# Supplementary material for: Chromatin activity of IκBα mediates the exit from naïve pluripotency
Source: eLife journal article supplement (doi:10.7554/elife.102784), 2025-01-16
Supplement: fig5-data1 [file Figure 5E-annotated.pdf › Figure 5_source data 1/Figure 5E-annotated.pdf]

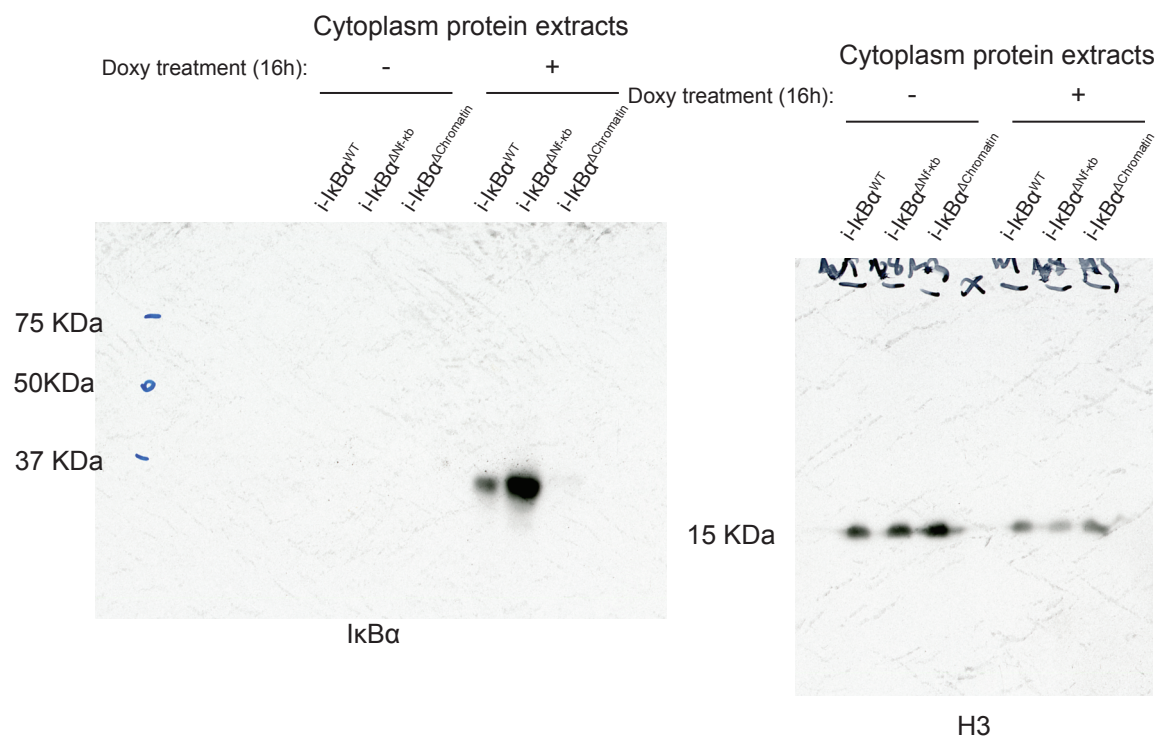

Figure 5. Source data 1. Original membranes corresponding to Figure 5, panel E. Only chromatin protein extracts were loaded into the gel.
