# Supplementary material for: Chromatin activity of IκBα mediates the exit from naïve pluripotency
Source: eLife. 2025 Oct 22;14:RP102784. doi: 10.7554/eLife.102784 (PMC12543326; doi:10.7554/eLife.102784)
Supplement: Supplementary file 1. [file elife-102784-supp1.xlsx]

## Sheet: Hoja1
gRNAs to generate Nfkbia-/- mESCs
Name	Forward sequence	Reverse sequence
Nfkbia gRNA 1	CACCGTGGACGATCGCCACGACAG	aaacCTGTCGTGGCGATCGTCCAC
Nfkbia gRNA 2	CACCGCCTTCTTGAGGCCATCCCGC	aaacGCGGGATGGCCTCAAGAAGGC
Primers used for qPCR
Gene	Foward sequence	Reverse sequence
Tbp	ACCCTTCACCAATGACTCCTATG	ATGATGACTGCAGCAAATCGC
Gapdh	TGTTCCTACCCCCAATGTGT	TGTGAGGGAGATGCTCAGTG
Pou5f1	GGAGGGAGAGGTGAAACCGT	CCAGGTTCGAGGATCCACCC
Zfp42 (Rex1)	GTTCGTCCATCTAAAAAGGG	TAGTCCATTTCTCTAATGCCC
Nanog	AGGGTCTGCTACTGAGATGCTCTG	CAACCACTGGTTTTTCTGCCACCG
Sox2	TACAGAGAAAACCTGAGGGCGG	CGCCCGGAGTCTAGCTCTAAAT
Klf2	CTGCGTACACACACAGGTGAG	CGCTTCATGTGCAAGGCCAG
Sall4	CCACGAGCGAACACACACGGGA	CCTCGGGCGCTCTCTTTCCCT
Esrrb	GGGATGCTGAAGGAAGGTGTG	GGGGATATCGTTGGGAGGCAT
Tbx3	CAAAGCCGAGGCGCTCCAAGC	GCGTGGCCGGGGTCTTCTTC
Gbx2	CGGTGGATGGTGGCCGGTAAG	GCTCTGACGATGTGGAACCGCG
Klf4	GACCAGATGCAGTCACAAGTCC	GGTTTCTCGCCTGTGTGAGTTC
Nfkbia	AACCTGCAGCAGACTCCACT	GACACGTGTGGCCATTGTAG
Oligos to generate PB-TRE-mNfkbia-T2A-EGFP
BmtI-mNfkbia-FWD	TAAGCAGCTAGCgccaccatgtttCAGCCAGCTGGGCACGGCCA
SalI-mNfkbia-REV	TGCTTAGTCGACTAATGTCAGACGCTGGCCTCC
SalI-T2A-GFP-FWD	TAAGCAGTCGACgagggcagaggaagtctgctaa
AgeI-T2A-GFP-REV	TGCTTAaccggtttagaattccttgtacagctcgtcc
