# Supplementary material for: Chromatin activity of IκBα mediates the exit from naïve pluripotency
Source: eLife. 2025 Oct 22;14:RP102784. doi: 10.7554/eLife.102784 (PMC12543326; doi:10.7554/eLife.102784)
Supplement: Supplementary file 2. [file elife-102784-supp2.xlsx]

## Sheet: H3K4me3_DBA_KOvsWT
seqnames	start	end	width	strand	Conc	Conc_KO	Conc_WT	Fold	p.value	FDR	annotation	geneChr	geneStart	geneEnd	geneLength	geneStrand	geneId	transcriptId	distanceToTSS	ENTREZID	SYMBOL	GENENAME
8	121542077	121542377	301	*	5.40264	6.37397	0.735716	5.49501	1.73039e-17	4.04168e-13	Promoter (<=1kb)	8	121542080	121543481	1402	1	ENSMUSG00000098211	ENSMUST00000182145	0
6	30738209	30738509	301	*	4.81756	5.74761	1.41641	4.22688	2.45027e-13	2.86155e-09	5' UTR	6	30738055	30738878	824	1	ENSMUSG00000051855	ENSMUST00000131465	154	17294	Mest	mesoderm specific transcript
16	38447232	38447532	301	*	5.00059	5.82486	2.87629	2.88518	1.46928e-11	1.00226e-07	Promoter (4-5kb)	16	38451982	38453494	1513	1	ENSMUSG00000097576	ENSMUST00000180735	-4450
2	157560043	157560343	301	*	4.53471	5.47096	1.0029	4.34339	1.71641e-11	1.00226e-07	Promoter (<=1kb)	2	157560078	157562504	2427	1	ENSMUSG00000067786	ENSMUST00000153739	0	18111	Nnat	neuronatin
12	55492315	55492615	301	*	4.98658	3.06095	5.78299	-2.74606	1.52574e-10	5.79389e-07	Promoter (<=1kb)	12	55489410	55492647	3238	2	ENSMUSG00000021025	ENSMUST00000021413	32	18035	Nfkbia	nuclear factor of kappa light polypeptide gene enhancer in B cells inhibitor, alpha
2	174262018	174262318	301	*	3.77388	4.77388	0	7.75942	1.82158e-10	5.79389e-07	Distal Intergenic	2	174267047	174267125	79	2	ENSMUSG00000065521	ENSMUST00000083587	4807	723906	Mir296	microRNA 296
16	38450133	38450433	301	*	4.21986	5.15393	0.735494	4.27811	1.89016e-10	5.79389e-07	Promoter (1-2kb)	16	38451982	38453494	1513	1	ENSMUSG00000097576	ENSMUST00000180735	-1549
16	48431249	48431549	301	*	3.79086	4.79086	0	7.77631	1.98446e-10	5.79389e-07	Promoter (<=1kb)	16	48431237	48630900	199664	1	ENSMUSG00000022652	ENSMUST00000023330	12	17450	Morc1	microrchidia 1
8	117801674	117801974	301	*	5.71143	6.37678	4.43927	1.88894	7.23543e-10	1.87775e-06	Promoter (<=1kb)	8	117791645	117801943	10299	2	ENSMUSG00000031843	ENSMUST00000034303	0	68533	Mphosph6	M phase phosphoprotein 6
12	112645087	112645387	301	*	5.93427	4.93886	6.5177	-1.61742	1.41025e-09	3.29391e-06	Intron (ENSMUST00000021728/ENSMUSG00000064326, intron 1 of 3)	12	112644967	112649037	4071	1	ENSMUSG00000064326	ENSMUST00000109755	120	30954	Siva1	SIVA1, apoptosis-inducing factor
3	135549184	135549484	301	*	3.85588	4.82232	0	5.12829	1.87639e-09	3.91856e-06	3' UTR	3	135548904	135554769	5866	1	ENSMUSG00000028164	ENSMUST00000147872	280	110173	Manba	mannosidase, beta A, lysosomal
1	120086257	120086557	301	*	3.7401	4.72197	0	5.8164	2.07576e-09	3.91856e-06	Distal Intergenic	1	120067377	120074074	6698	2	ENSMUSG00000050777	ENSMUST00000056089	-12183	170706	Tmem37	transmembrane protein 37
2	71719425	71719725	301	*	3.60472	4.60472	0	7.59108	2.18098e-09	3.91856e-06	Promoter (<=1kb)	2	71719417	71730966	11550	1	ENSMUSG00000064263	ENSMUST00000079720	8	381371	Platr26	pluripotency associated transcript 26
17	46808225	46808525	301	*	3.98479	4.92285	0.412224	4.34658	4.85763e-09	7.39375e-06	Exon (ENSMUST00000040624/ENSMUSG00000036568, exon 8 of 11)	17	46807273	46812185	4913	2	ENSMUSG00000036568	ENSMUST00000233142	3660	210982	Bicral	BRD4 interacting chromatin remodeling complex associated protein like
7	28173610	28173910	301	*	3.54374	4.54374	0	7.53043	4.90961e-09	7.39375e-06	Promoter (<=1kb)	7	28174872	28176206	1335	1	ENSMUSG00000046865	ENSMUST00000207384	-962	14113	Fbl	fibrillarin
10	79612119	79612419	301	*	3.5212	0	4.5212	-7.55036	5.06486e-09	7.39375e-06	Exon (ENSMUST00000059699/ENSMUSG00000045912, exon 2 of 2)	10	79606854	79614000	7147	2	ENSMUSG00000045912	ENSMUST00000059699	1581	237397	C2cd4c	C2 calcium-dependent domain containing 4C
2	17937956	17938256	301	*	3.78925	4.75405	0	5.05893	7.74532e-09	1.06416e-05	Distal Intergenic	2	17996417	17996958	542	2	ENSMUSG00000062651	ENSMUST00000105001	58702	68231	H2al2a	H2A histone family member L2A
10	13090840	13091140	301	*	4.68339	5.49349	2.664	2.76318	1.01318e-08	1.31471e-05	Promoter (<=1kb)	10	13090841	13113444	22604	1	ENSMUSG00000019817	ENSMUST00000130638	0	22634	Plagl1	pleiomorphic adenoma gene-like 1
8	40650767	40651067	301	*	4.50309	5.31077	2.50081	2.74095	1.1829e-08	1.45403e-05	Distal Intergenic	8	40606905	40634797	27893	2	ENSMUSG00000039431	ENSMUST00000174537	-15970	54384	Mtmr7	myotubularin related protein 7
8	89015334	89015634	301	*	3.8962	4.84693	0	4.64354	1.30712e-08	1.45403e-05	Distal Intergenic	8	89024735	89024831	97	1	ENSMUSG00000099078	ENSMUST00000183771	-9101	102465899	Mir8110	microRNA 8110
5	30905551	30905851	301	*	3.87455	4.8073	0.417855	4.22594	1.3073e-08	1.45403e-05	3' UTR	5	30906518	30907725	1208	2	ENSMUSG00000038803	ENSMUST00000132034	1874	67695	Ost4	oligosaccharyltransferase complex subunit 4 (non-catalytic)
11	107347617	107347917	301	*	4.30557	5.13822	2.1149	2.94548	1.49175e-08	1.58376e-05	Intron (ENSMUST00000103064/ENSMUSG00000040430, intron 1 of 9)	11	107226257	107348130	121874	2	ENSMUSG00000040430	ENSMUST00000134763	213	71795	Pitpnc1	phosphatidylinositol transfer protein, cytoplasmic 1
7	27649688	27649988	301	*	3.60735	4.58749	0	5.68404	1.56025e-08	1.58447e-05	Exon (ENSMUST00000239103/ENSMUSG00000118518, exon 2 of 3)	7	27649777	27650983	1207	2	ENSMUSG00000108592	ENSMUST00000238805	995
1	63200451	63200751	301	*	4.8078	5.52436	3.32074	2.14734	2.51132e-08	2.44403e-05	Promoter (<=1kb)	1	63200708	63207967	7260	1	ENSMUSG00000086730	ENSMUST00000189722	0
13	59679130	59679430	301	*	3.37174	4.37174	0	7.35942	5.22526e-08	4.88186e-05	Promoter (3-4kb)	13	59634626	59675811	41186	2	ENSMUSG00000021556	ENSMUST00000022039	-3319	105348	Golm1	golgi membrane protein 1
8	116672647	116672947	301	*	5.28787	5.93358	4.08857	1.795	5.82381e-08	5.23179e-05	Intron (ENSMUST00000109102/ENSMUSG00000031758, intron 1 of 6)	8	116574400	116732991	158592	2	ENSMUSG00000031758	ENSMUST00000109102	60044	75796	Cdyl2	chromodomain protein, Y chromosome-like 2
3	51211067	51211367	301	*	4.073	4.92278	1.7349	3.09896	6.08545e-08	5.26436e-05	Distal Intergenic	3	51224447	51251644	27198	1	ENSMUSG00000023087	ENSMUST00000023849	-13080	12457	Noct	nocturnin
10	70365794	70366094	301	*	3.95213	4.82209	1.41583	3.305	6.53076e-08	5.44782e-05	Distal Intergenic	10	70338302	70338454	153	1	ENSMUSG00000112676	ENSMUST00000219977	27492	102636776	Gm20108	putative 60S ribosomal protein L39-like 5
8	57498572	57498872	301	*	3.4985	4.47707	0	5.57425	6.78007e-08	5.46076e-05	Intron (ENSMUST00000180690/ENSMUSG00000096917, intron 2 of 2)	8	57505815	57506731	917	1	ENSMUSG00000096917	ENSMUST00000210752	-6943	78353	2500002B13Rik	RIKEN cDNA 2500002B13 gene
7	42592156	42592456	301	*	4.2223	5.0588	1.99996	2.97797	7.35527e-08	5.72656e-05	Promoter (<=1kb)	7	42579783	42592547	12765	2	ENSMUSG00000092335	ENSMUST00000173283	91	637776	Zfp977	zinc finger protein 977
8	88951749	88952049	301	*	3.88847	4.78776	0.997984	3.66756	8.51848e-08	6.41826e-05	Distal Intergenic	8	89024735	89024831	97	1	ENSMUSG00000099078	ENSMUST00000183771	-72686	102465899	Mir8110	microRNA 8110
9	78526194	78526494	301	*	3.32364	4.32364	0	7.31161	9.35768e-08	6.71578e-05	Distal Intergenic	9	78520546	78522157	1612	1	ENSMUSG00000111417	ENSMUST00000214586	5648
2	129253136	129253436	301	*	3.32207	4.32207	0	7.31005	9.61606e-08	6.71578e-05	Intron (ENSMUST00000141964/ENSMUSG00000085485, intron 1 of 2)	2	129246376	129268526	22151	1	ENSMUSG00000085485	ENSMUST00000141964	6760
8	107422304	107422604	301	*	3.31903	4.31903	0	7.30703	9.77593e-08	6.71578e-05	Promoter (<=1kb)	8	107418056	107422327	4272	2	ENSMUSG00000003848	ENSMUST00000076585	0	67619	Nob1	NIN1/RPN12 binding protein 1 homolog
8	41374324	41374624	301	*	6.22028	6.73855	5.40365	1.28983	1.05539e-07	7.04309e-05	Promoter (<=1kb)	8	41346180	41374635	28456	2	ENSMUSG00000031591	ENSMUST00000110417	11	11886	Asah1	N-acylsphingosine amidohydrolase 1
7	35185310	35185610	301	*	4.09889	2.0008	4.91973	-2.92234	1.15183e-07	7.47311e-05	Promoter (<=1kb)	7	35186385	35195449	9065	1	ENSMUSG00000030495	ENSMUST00000135452	-775	53896	Slc7a10	solute carrier family 7 (cationic amino acid transporter, y+ system), member 10
5	137574623	137574923	301	*	3.29989	4.29989	0	7.28802	1.30544e-07	8.24085e-05	Exon (ENSMUST00000198866/ENSMUSG00000029716, exon 6 of 19)	5	137574515	137577775	3261	1	ENSMUSG00000029716	ENSMUST00000197705	108	50765	Tfr2	transferrin receptor 2
17	17491506	17491806	301	*	4.52618	5.27657	2.87214	2.34252	1.42052e-07	8.73131e-05	Distal Intergenic	17	17500343	17500944	602	1	ENSMUSG00000116532	ENSMUST00000232178	-8537	383297	Gm5232	proteasome (prosome, macropain) subunit, beta type 3 pseudogene
1	164454943	164455243	301	*	3.56355	4.52236	0	4.83055	1.47535e-07	8.79781e-05	Promoter (1-2kb)	1	164441459	164453777	12319	2	ENSMUSG00000026576	ENSMUST00000193367	-1166	11931	Atp1b1	ATPase, Na+/K+ transporting, beta 1 polypeptide
18	34512057	34512357	301	*	3.56389	4.52265	0	4.82881	1.50667e-07	8.79781e-05	Distal Intergenic	18	34509737	34509853	117	1	ENSMUSG00000084467	ENSMUST00000122518	2320
8	84893445	84893745	301	*	6.26699	6.76884	5.49095	1.23303	1.92651e-07	0.000105303	Promoter (<=1kb)	8	84892651	84893475	825	2	ENSMUSG00000003809	ENSMUST00000128023	0	270076	Gcdh	glutaryl-Coenzyme A dehydrogenase
8	107133758	107134058	301	*	4.34374	5.1133	2.58376	2.4629	1.93731e-07	0.000105303	Distal Intergenic	8	107119110	107119892	783	1	ENSMUSG00000102271	ENSMUST00000193420	14648
8	78435935	78436235	301	*	5.19121	5.81816	4.05737	1.71082	1.94677e-07	0.000105303	Exon (ENSMUST00000034115/ENSMUSG00000031688, exon 1 of 2)	8	78433010	78436645	3636	2	ENSMUSG00000031688	ENSMUST00000034115	410	18997	Pou4f2	POU domain, class 4, transcription factor 2
8	85554945	85555245	301	*	6.61707	7.09511	5.89717	1.15371	1.9837e-07	0.000105303	Promoter (<=1kb)	8	85537633	85555344	17712	2	ENSMUSG00000031701	ENSMUST00000034138	99	56445	Dnaja2	DnaJ heat shock protein family (Hsp40) member A2
5	123377162	123377462	301	*	3.24898	4.24898	0	7.23743	2.17828e-07	0.000113063	Distal Intergenic	5	123366999	123368919	1921	1	ENSMUSG00000104830	ENSMUST00000200118	10163
6	82705134	82705434	301	*	3.80825	4.70131	1.00125	3.57828	2.26629e-07	0.000115074	Promoter (<=1kb)	6	82618992	82705365	86374	2	ENSMUSG00000030042	ENSMUST00000161309	0	66979	Pole4	polymerase (DNA-directed), epsilon 4 (p12 subunit)
12	111758917	111759217	301	*	6.08848	5.3475	6.57562	-1.26808	2.60047e-07	0.000129232	Promoter (<=1kb)	12	111758956	111794897	35942	1	ENSMUSG00000021288	ENSMUST00000118471	0	16593	Klc1	kinesin light chain 1
11	52358328	52358628	301	*	3.22181	4.22181	0	7.21045	2.93193e-07	0.000142669	Promoter (2-3kb)	11	52360860	52389397	28538	1	ENSMUSG00000020402	ENSMUST00000102758	-2232	22333	Vdac1	voltage-dependent anion channel 1
5	138280802	138281102	301	*	4.11692	4.90857	2.22234	2.61214	3.63742e-07	0.000171955	Intron (ENSMUST00000160729/ENSMUSG00000036928, intron 1 of 6)	5	138280556	138290406	9851	1	ENSMUSG00000036928	ENSMUST00000161691	246	50878	Stag3	stromal antigen 3
5	148371175	148371475	301	*	4.59502	5.32237	3.05717	2.206	3.75937e-07	0.000171955	Promoter (<=1kb)	5	148352153	148371546	19394	2	ENSMUSG00000041313	ENSMUST00000138596	71	11987	Slc7a1	solute carrier family 7 (cationic amino acid transporter, y+ system), member 1
8	64733232	64733532	301	*	6.08391	6.5843	5.3114	1.22774	3.82802e-07	0.000171955	Promoter (<=1kb)	8	64724981	64733548	8568	2	ENSMUSG00000031604	ENSMUST00000135943	16	66234	Msmo1	methylsterol monoxygenase 1
7	143295956	143296256	301	*	5.53859	6.10843	4.58304	1.47806	3.83412e-07	0.000171955	Exon (ENSMUST00000185789/ENSMUSG00000101609, exon 1 of 1)	7	143203458	143296549	93092	2	ENSMUSG00000101609	ENSMUST00000185789	293	63830	Kcnq1ot1	KCNQ1 overlapping transcript 1
1	153094654	153094954	301	*	4.07312	4.9071	1.87156	2.95136	3.95584e-07	0.000171955	Intron (ENSMUST00000186368/ENSMUSG00000042751, intron 8 of 11)	1	153093480	153094597	1118	1	ENSMUSG00000042751	ENSMUST00000190960	1174	226518	Nmnat2	nicotinamide nucleotide adenylyltransferase 2
15	88710992	88711292	301	*	3.60593	4.54546	0	4.34371	3.9755e-07	0.000171955	Intron (ENSMUST00000109381/ENSMUSG00000022387, intron 6 of 12)	15	88713433	88717040	3608	2	ENSMUSG00000022387	ENSMUST00000139515	5748	223770	Brd1	bromodomain containing 1
8	84990635	84990935	301	*	6.19351	6.67791	5.45894	1.17413	4.05097e-07	0.000172033	Promoter (<=1kb)	8	84990642	84999706	9065	1	ENSMUSG00000052566	ENSMUST00000210326	0	170833	Hook2	hook microtubule tethering protein 2
2	31672084	31672384	301	*	3.8779	4.77632	0.999218	3.65497	4.1759e-07	0.000174172	Promoter (<=1kb)	2	31673256	31678533	5278	1	ENSMUSG00000039356	ENSMUST00000146135	-872	227715	Exosc2	exosome component 2
2	167445858	167446158	301	*	3.20046	4.20046	0	7.18924	4.28852e-07	0.000174875	Promoter (4-5kb)	2	167450966	167467724	16759	1	ENSMUSG00000039463	ENSMUST00000125855	-4808	77031	Slc9a8	solute carrier family 9 (sodium/hydrogen exchanger), member 8
3	80800644	80800944	301	*	3.60283	0.417375	4.52127	-4.02313	4.3425e-07	0.000174875	Exon (ENSMUST00000194164/ENSMUSG00000033981, exon 2 of 2)	3	80688040	80802579	114540	2	ENSMUSG00000033981	ENSMUST00000192463	1635	14800	Gria2	glutamate receptor, ionotropic, AMPA2 (alpha 2)
5	148303407	148303707	301	*	4.21137	5.04672	1.99861	2.96729	4.6469e-07	0.000181867	3' UTR	5	148303174	148314000	10827	1	ENSMUSG00000029651	ENSMUST00000085554	233	77521	Mtus2	microtubule associated tumor suppressor candidate 2
10	77199978	77200278	301	*	3.97217	4.82768	1.58076	3.15269	4.70466e-07	0.000181867	Distal Intergenic	10	77052178	77166548	114371	2	ENSMUSG00000001435	ENSMUST00000081654	-33430	12822	Col18a1	collagen, type XVIII, alpha 1
7	126864556	126864856	301	*	3.34534	4.32145	0	5.4173	4.76136e-07	0.000181867	Exon (ENSMUST00000037248/ENSMUSG00000042606, exon 6 of 7)	7	126864416	126864918	503	1	ENSMUSG00000042606	ENSMUST00000146120	140	233876	Hirip3	HIRA interacting protein 3
7	44819989	44820289	301	*	3.34918	4.32536	0	5.42119	4.87866e-07	0.000181867	Intron (ENSMUST00000208626/ENSMUSG00000109511, intron 1 of 1)	7	44818437	44828688	10252	1	ENSMUSG00000109511	ENSMUST00000207085	1552	18226	Nup62	nucleoporin 62
12	109033753	109034053	301	*	4.72099	3.50395	5.3716	-1.89848	4.90543e-07	0.000181867	Exon (ENSMUST00000209829/ENSMUSG00000040867, exon 7 of 7)	12	109034610	109037087	2478	2	ENSMUSG00000040867	ENSMUST00000187230	3034	380785	Begain	brain-enriched guanylate kinase-associated
17	46846177	46846477	301	*	4.99205	5.62463	3.83898	1.73441	5.36415e-07	0.000192459	Intron (ENSMUST00000233455/ENSMUSG00000036568, intron 1 of 4)	17	46825795	46858482	32688	2	ENSMUSG00000036568	ENSMUST00000233455	12005	210982	Bicral	BRD4 interacting chromatin remodeling complex associated protein like
8	80918838	80919138	301	*	3.67897	4.60189	0.41435	4.02499	5.42089e-07	0.000192459	Distal Intergenic	8	80933677	80934588	912	1	ENSMUSG00000098223	ENSMUST00000182279	-14539	234501	Gm4891	glyceraldehyde-3-phosphate dehydrogenase pseudogene
8	95177941	95178241	301	*	3.69707	4.60143	0.734559	3.72892	5.43833e-07	0.000192459	Intron (ENSMUST00000212424/ENSMUSG00000031788, intron 1 of 4)	8	95110249	95182791	72543	2	ENSMUSG00000031788	ENSMUST00000212424	4550	16582	Kifc3	kinesin family member C3
8	47994970	47995270	301	*	4.10263	4.89223	2.22118	2.59702	5.59899e-07	0.000195188	Promoter (4-5kb)	8	47985333	47990924	5592	2	ENSMUSG00000031563	ENSMUST00000212282	-4046	52357	Wwc2	WW, C2 and coiled-coil domain containing 2
8	72547689	72547989	301	*	6.55494	7.01214	5.88177	1.08619	5.95817e-07	0.000204655	5' UTR	8	72494561	72548270	53710	2	ENSMUSG00000045248	ENSMUST00000058534	281	70625	Med26	mediator complex subunit 26
15	79843551	79843851	301	*	3.45829	4.41387	0	4.72071	6.16775e-07	0.000208783	Intron (ENSMUST00000230701/ENSMUSG00000115971, intron 1 of 1)	15	79843163	79846763	3601	1	ENSMUSG00000115971	ENSMUST00000230701	388
9	75402213	75402513	301	*	3.56686	4.50469	0	4.30319	6.59194e-07	0.000219954	Promoter (4-5kb)	9	75393089	75397607	4519	2	ENSMUSG00000042688	ENSMUST00000174034	-4606	50772	Mapk6	mitogen-activated protein kinase 6
11	96111511	96111811	301	*	4.80645	5.44753	3.62371	1.77108	7.06754e-07	0.000229467	Intron (ENSMUST00000068686/ENSMUSG00000006056, intron 1 of 5)	11	96099914	96111962	12049	2	ENSMUSG00000006056	ENSMUST00000097162	151	76815	Calcoco2	calcium binding and coiled-coil domain 2
12	108792290	108792590	301	*	5.99287	5.28647	6.46499	-1.21844	7.07353e-07	0.000229467	Exon (ENSMUST00000223001/ENSMUSG00000114045, exon 1 of 1)	12	108790035	108792743	2709	2	ENSMUSG00000114045	ENSMUST00000223001	153
10	76027401	76027701	301	*	4.12967	4.95527	1.99505	2.87974	7.30671e-07	0.000233785	Promoter (4-5kb)	10	76032650	76038388	5739	1	ENSMUSG00000049764	ENSMUST00000218627	-4949	64453	Zfp280b	zinc finger protein 280B
8	71745825	71746125	301	*	4.07523	4.90974	1.86925	2.95629	7.62104e-07	0.000240547	Distal Intergenic	8	71760118	71760591	474	1	ENSMUSG00000110473	ENSMUST00000212598	-13993
12	103325241	103325541	301	*	4.03061	2.22213	4.8084	-2.5965	7.72541e-07	0.00024059	Exon (ENSMUST00000021617/ENSMUSG00000021200, exon 8 of 10)	12	103321146	103335584	14439	2	ENSMUSG00000021200	ENSMUST00000127447	10043	65256	Asb2	ankyrin repeat and SOCS box-containing 2
3	135522458	135522758	301	*	3.68215	4.58548	0.734513	3.7131	8.02501e-07	0.000246632	Promoter (<=1kb)	3	135522935	135524559	1625	1	ENSMUSG00000028164	ENSMUST00000134095	-177	110173	Manba	mannosidase, beta A, lysosomal
8	71406199	71406499	301	*	6.79164	7.2386	6.14063	1.05407	8.27081e-07	0.000250231	Exon (ENSMUST00000119976/ENSMUSG00000046295, exon 2 of 9)	8	71406024	71409483	3460	1	ENSMUSG00000046295	ENSMUST00000120725	175	234396	Ankle1	ankyrin repeat and LEM domain containing 1
8	70871978	70872278	301	*	4.10163	4.92278	2.00115	2.84132	8.35638e-07	0.000250231	Intron (ENSMUST00000007865/ENSMUSG00000007721, intron 1 of 4)	8	70869988	70873383	3396	2	ENSMUSG00000007721	ENSMUST00000212680	1105	234388	Ccdc124	coiled-coil domain containing 124
15	72809714	72810014	301	*	3.11685	4.11685	0	7.10622	9.44974e-07	0.000279389	Exon (ENSMUST00000202826/ENSMUSG00000106847, exon 1 of 1)	15	72805600	72810324	4725	2	ENSMUSG00000106847	ENSMUST00000202826	310	353342	Peg13	paternally expressed 13
6	87846608	87846908	301	*	3.11616	4.11616	0	7.10553	9.6345e-07	0.000281291	Promoter (<=1kb)	6	87845530	87846317	788	2	ENSMUSG00000030057	ENSMUST00000204104	-291	12785	Cnbp	cellular nucleic acid binding protein
17	27325372	27325672	301	*	3.71848	4.62419	0.736165	3.74997	9.78168e-07	0.000282062	Exon (ENSMUST00000232347/ENSMUSG00000073430, exon 1 of 1)	17	27325206	27344828	19623	1	ENSMUSG00000073430	ENSMUST00000232125	166	100038429	Gm10505	predicted gene 10505
7	144789689	144789989	301	*	3.11905	4.11905	0	7.10841	9.94229e-07	0.000282303	Intron (ENSMUST00000207398/ENSMUSG00000109442, intron 1 of 2)	7	144787041	144791808	4768	2	ENSMUSG00000109442	ENSMUST00000207398	1819
8	94152568	94152868	301	*	4.64169	5.31968	3.32007	1.94392	1.00986e-06	0.000282303	Promoter (<=1kb)	8	94152607	94154146	1540	1	ENSMUSG00000031760	ENSMUST00000034211	0	17751	Mt3	metallothionein 3
4	11385834	11386134	301	*	4.87448	3.73893	5.50194	-1.79587	1.01526e-06	0.000282303	Intron (ENSMUST00000043781/ENSMUSG00000040728, intron 1 of 14)	4	11357586	11386394	28809	2	ENSMUSG00000040728	ENSMUST00000155519	260	207920	Esrp1	epithelial splicing regulatory protein 1
8	83566822	83567122	301	*	6.26005	6.72267	5.57495	1.10314	1.06218e-06	0.000291875	Promoter (<=1kb)	8	83566758	83571626	4869	1	ENSMUSG00000033938	ENSMUST00000127162	64	66916	Ndufb7	NADH:ubiquinone oxidoreductase subunit B7
8	84247876	84248176	301	*	3.52413	4.4602	0	4.26204	1.0749e-06	0.000291934	Intron (ENSMUST00000019506/ENSMUSG00000019362, intron 2 of 2)	8	84246238	84249719	3482	2	ENSMUSG00000019362	ENSMUST00000019506	1543	101966	D8Ertd738e	DNA segment, Chr 8, ERATO Doi 738, expressed
8	110846847	110847147	301	*	5.80725	6.32853	4.98297	1.29964	1.12648e-06	0.000302427	Promoter (<=1kb)	8	110847024	110853728	6705	1	ENSMUSG00000031753	ENSMUST00000174165	0	102339	Cog4	component of oligomeric golgi complex 4
8	123760939	123761239	301	*	3.47819	4.41201	0	4.21142	1.17904e-06	0.000311733	Intron (ENSMUST00000127664/ENSMUSG00000092329, intron 1 of 15)	8	123744631	123754726	10096	2	ENSMUSG00000097203	ENSMUST00000181805	-6213	100042484	4732419C18Rik	RIKEN cDNA 4732419C18 gene
17	30601964	30602264	301	*	4.50451	5.19926	3.11389	2.02739	1.18783e-06	0.000311733	Promoter (<=1kb)	17	30600051	30602355	2305	2	ENSMUSG00000024026	ENSMUST00000237063	91	109801	Glo1	glyoxalase 1
1	19209690	19209990	301	*	3.108	0	4.108	-7.13971	1.26579e-06	0.000328501	Intron (ENSMUST00000027059/ENSMUSG00000025927, intron 1 of 6)	1	19208960	19238083	29124	1	ENSMUSG00000025927	ENSMUST00000187754	730	21419	Tfap2b	transcription factor AP-2 beta
9	20878548	20878848	301	*	4.59494	5.26028	3.32283	1.88196	1.29345e-06	0.000331989	5' UTR	9	20873808	20879727	5920	2	ENSMUSG00000038742	ENSMUST00000043726	879	70726	Angptl6	angiopoietin-like 6
8	120736170	120736470	301	*	4.12886	4.92161	2.22713	2.62035	1.31841e-06	0.000332668	Promoter (<=1kb)	8	120736358	120755404	19047	1	ENSMUSG00000041515	ENSMUST00000160943	0	15900	Irf8	interferon regulatory factor 8
4	155220276	155220576	301	*	3.09097	4.09097	0	7.08054	1.33588e-06	0.000332668	Intron (ENSMUST00000084103/ENSMUSG00000029050, intron 2 of 7)	4	155154075	155222535	68461	2	ENSMUSG00000029050	ENSMUST00000084103	1959	20481	Ski	ski sarcoma viral oncogene homolog (avian)
9	99574813	99575113	301	*	3.27864	4.25365	0	5.35228	1.33882e-06	0.000332668	Promoter (<=1kb)	9	99575799	99584501	8703	1	ENSMUSG00000032469	ENSMUST00000066650	-686	83703	Dbr1	debranching RNA lariats 1
8	95434542	95434842	301	*	6.28825	6.77181	5.55563	1.17149	1.36028e-06	0.000334442	Promoter (<=1kb)	8	95420249	95434757	14509	2	ENSMUSG00000031796	ENSMUST00000212731	0	14894	Cfap20	cilia and flagella associated protein 20
5	143128962	143129262	301	*	3.95532	4.7909	1.74058	2.96201	1.45902e-06	0.000354982	Distal Intergenic	5	143137238	143138200	963	2	ENSMUSG00000090981	ENSMUST00000218872	8938
12	113098737	113099037	301	*	5.3298	4.46007	5.86858	-1.44586	1.54549e-06	0.000372145	Intron (ENSMUST00000109727/ENSMUSG00000021144, intron 1 of 19)	12	113098401	113136669	38269	1	ENSMUSG00000021144	ENSMUST00000130926	336	116870	Mta1	metastasis associated 1
1	182028683	182028983	301	*	4.17003	4.92247	2.50509	2.34981	1.61243e-06	0.000382669	Distal Intergenic	1	181904400	182019990	115591	2	ENSMUSG00000022995	ENSMUST00000111024	-8693	13800	Enah	ENAH actin regulator
9	44421510	44421810	301	*	3.60504	4.50285	0.7349	3.63053	1.62431e-06	0.000382669	Intron (ENSMUST00000213494/ENSMUSG00000111849, intron 2 of 2)	9	44419938	44423391	3454	2	ENSMUSG00000111849	ENSMUST00000213494	1581
15	83044806	83045106	301	*	3.34448	4.29641	0	4.60535	1.63835e-06	0.000382669	Distal Intergenic	15	82992973	83033306	40334	2	ENSMUSG00000058099	ENSMUST00000231165	-11500	74039	Nfam1	Nfat activating molecule with ITAM motif 1
12	111671823	111672123	301	*	4.24795	2.80802	4.95407	-2.16846	1.76113e-06	0.000406233	5' UTR	12	111669361	111672282	2922	2	ENSMUSG00000001270	ENSMUST00000222705	159	12709	Ckb	creatine kinase, brain
6	71607607	71607907	301	*	3.39747	4.35111	0	4.65838	1.77882e-06	0.000406233	Intron (ENSMUST00000065509/ENSMUSG00000053470, intron 11 of 26)	6	71594609	71609139	14531	2	ENSMUSG00000053470	ENSMUST00000205470	1232	104263	Kdm3a	lysine (K)-specific demethylase 3A
12	108793859	108794159	301	*	5.99721	5.32277	6.45499	-1.17227	1.79141e-06	0.000406233	Exon (ENSMUST00000021692/ENSMUSG00000021264, exon 1 of 5)	12	108792973	108820148	27176	1	ENSMUSG00000021264	ENSMUST00000021692	886	22632	Yy1	YY1 transcription factor
8	105295824	105296124	301	*	4.70914	5.34511	3.54434	1.74753	1.92671e-06	0.000432714	Promoter (<=1kb)	8	105289924	105296098	6175	2	ENSMUSG00000043251	ENSMUST00000057855	0	277978	Exoc3l	exocyst complex component 3-like
8	79639775	79640075	301	*	6.80206	7.23971	6.17079	1.02507	1.95608e-06	0.000435125	Promoter (<=1kb)	8	79639704	79677672	37969	1	ENSMUSG00000036990	ENSMUST00000173286	71	73945	Otud4	OTU domain containing 4
15	81667127	81667427	301	*	3.05337	4.05337	0	7.0432	2.00193e-06	0.000441123	Promoter (1-2kb)	15	81668678	81670369	1692	1	ENSMUSG00000022394	ENSMUST00000173105	-1251	214669	L3mbtl2	L3MBTL2 polycomb repressive complex 1 subunit
4	134118890	134119190	301	*	3.96766	4.78849	1.86968	2.83512	2.19605e-06	0.000479375	Promoter (4-5kb)	4	134123469	134126774	3306	1	ENSMUSG00000012126	ENSMUST00000139616	-4279	67586	Ubxn11	UBX domain protein 11
8	71592209	71592509	301	*	6.83206	7.26572	6.2091	1.01282	2.23746e-06	0.000483891	Promoter (<=1kb)	8	71592211	71595665	3455	1	ENSMUSG00000031807	ENSMUST00000123240	0	66171	Pgls	6-phosphogluconolactonase
16	32657749	32658049	301	*	3.03046	4.03046	0	7.02047	2.31263e-06	0.00049556	Intron (ENSMUST00000145627/ENSMUSG00000022791, intron 1 of 3)	16	32657023	32668271	11249	1	ENSMUSG00000022791	ENSMUST00000150383	726	51789	Tnk2	tyrosine kinase, non-receptor, 2
12	110187894	110188194	301	*	4.0165	2.32293	4.77424	-2.46425	2.39584e-06	0.000508725	Promoter (<=1kb)	12	110177956	110188061	10106	2	ENSMUSG00000113733	ENSMUST00000222571	0	102638153	Gm34785	predicted gene, 34785
8	54077515	54077815	301	*	6.32166	6.77652	5.65361	1.07846	2.44058e-06	0.000511526	Promoter (<=1kb)	8	54077606	54187096	109491	1	ENSMUSG00000031520	ENSMUST00000033919	0	22341	Vegfc	vascular endothelial growth factor C
4	133064265	133064565	301	*	3.03056	4.03056	0	7.02057	2.45284e-06	0.000511526	Promoter (1-2kb)	4	133066249	133072063	5815	1	ENSMUSG00000037692	ENSMUST00000148518	-1684	230793	Ahdc1	AT hook, DNA binding motif, containing 1
13	37929518	37929818	301	*	3.34775	4.29974	0	4.60736	2.47748e-06	0.000512093	Exon (ENSMUST00000110238/ENSMUSG00000039087, exon 10 of 10)	13	37947016	37949206	2191	1	ENSMUSG00000039087	ENSMUST00000162849	-17198	68750	Rreb1	ras responsive element binding protein 1
8	123446260	123446560	301	*	3.77845	4.66936	0.999123	3.54861	2.51282e-06	0.000514842	Promoter (<=1kb)	8	123446939	123452895	5957	1	ENSMUSG00000001482	ENSMUST00000212391	-379	23854	Def8	differentially expressed in FDCP 8
11	95841972	95842272	301	*	3.66365	4.54491	1.00172	3.42223	2.56136e-06	0.000520223	Promoter (<=1kb)	11	95837077	95842098	5022	2	ENSMUSG00000018381	ENSMUST00000143492	0	66610	Abi3	ABI family member 3
4	83330110	83330410	301	*	3.03513	4.03513	0	7.02511	2.58696e-06	0.000520893	Distal Intergenic	4	83220300	83324255	103956	2	ENSMUSG00000038172	ENSMUST00000102823	-5855	69863	Ttc39b	tetratricopeptide repeat domain 39B
5	119673765	119674065	301	*	3.60008	4.49763	0.733397	3.62682	2.64688e-06	0.000528402	Promoter (1-2kb)	5	119675445	119680630	5186	1	ENSMUSG00000018604	ENSMUST00000145647	-1380	21386	Tbx3	T-box 3
12	111039814	111040114	301	*	5.89526	5.22306	6.35202	-1.16883	2.72278e-06	0.000538437	Promoter (<=1kb)	12	111039798	111113384	73587	1	ENSMUSG00000037896	ENSMUST00000116388	16	217864	Rcor1	REST corepressor 1
5	53566998	53567298	301	*	3.95335	4.75351	2.00276	2.67119	2.76064e-06	0.000538437	Intron (ENSMUST00000201991/ENSMUSG00000039191, intron 2 of 6)	5	53555834	53657358	101525	1	ENSMUSG00000039191	ENSMUST00000087360	11164	19664	Rbpj	recombination signal binding protein for immunoglobulin kappa J region
4	156188512	156188812	301	*	3.71697	4.58277	1.2241	3.24951	2.78225e-06	0.000538437	Promoter (2-3kb)	4	156165294	156186107	20814	2	ENSMUSG00000041936	ENSMUST00000181062	-2405	11603	Agrn	agrin
8	72160548	72160848	301	*	5.76063	6.27407	4.95609	1.27204	2.7981e-06	0.000538437	Promoter (<=1kb)	8	72147601	72160855	13255	2	ENSMUSG00000087502	ENSMUST00000156664	7
X	168795316	168795616	301	*	2.97152	0	3.97152	-7.00426	2.8124e-06	0.000538437	5' UTR	20	168795099	169304435	509337	1	ENSMUSG00000031355	ENSMUST00000033721	217	11856	Arhgap6	Rho GTPase activating protein 6
8	122556567	122556867	301	*	5.03182	5.62648	4.00231	1.57423	2.90787e-06	0.000552188	Intron (ENSMUST00000127664/ENSMUSG00000092329, intron 1 of 15)	8	122481698	122551329	69632	2	ENSMUSG00000014444	ENSMUST00000156333	-5238	234839	Piezo1	piezo-type mechanosensitive ion channel component 1
18	82760156	82760456	301	*	4.65553	5.31145	3.41897	1.83794	2.93305e-06	0.000552209	Promoter (1-2kb)	18	82754505	82759041	4537	2	ENSMUSG00000101773	ENSMUST00000188435	-1115	76961	2210420H20Rik	RIKEN cDNA 2210420H20 gene
5	149052617	149052917	301	*	6.40067	5.83307	6.80694	-1.01484	2.95526e-06	0.000552209	Promoter (<=1kb)	5	149050373	149052981	2609	2	ENSMUSG00000066551	ENSMUST00000123645	64	15289	Hmgb1	high mobility group box 1
13	45493623	45493923	301	*	3.00107	4.00107	0	6.99132	3.04503e-06	0.000563251	Distal Intergenic	13	45486224	45486330	107	2	ENSMUSG00000089211	ENSMUST00000158586	-7293
14	21482125	21482425	301	*	5.40055	5.94961	4.50318	1.39898	3.06259e-06	0.000563251	Intron (ENSMUST00000182996/ENSMUSG00000021767, intron 1 of 1)	14	21481459	21621977	140519	1	ENSMUSG00000021767	ENSMUST00000183201	666	54169	Kat6b	K(lysine) acetyltransferase 6B
5	136881552	136881852	301	*	2.96923	0	3.96923	-7.00198	3.18783e-06	0.000580794	Intron (ENSMUST00000057497/ENSMUSG00000004415, intron 1 of 12)	5	136765341	136882743	117403	2	ENSMUSG00000004415	ENSMUST00000173496	891	140709	Col26a1	collagen, type XXVI, alpha 1
9	65128461	65128761	301	*	3.90617	2.11581	4.68093	-2.573	3.20771e-06	0.000580794	Exon (ENSMUST00000035499/ENSMUSG00000032816, exon 11 of 20)	9	65141189	65185872	44684	1	ENSMUSG00000032394	ENSMUST00000034961	-12428	19289	Igdcc3	immunoglobulin superfamily, DCC subclass, member 3
8	86903341	86903641	301	*	4.07023	4.8382	2.31944	2.44743	3.30451e-06	0.000589282	Exon (ENSMUST00000183752/ENSMUSG00000098534, exon 2 of 3)	8	86902453	86919422	16970	1	ENSMUSG00000098534	ENSMUST00000183752	888
8	107150595	107150895	301	*	5.51977	6.0463	4.68207	1.3175	3.30504e-06	0.000589282	Promoter (<=1kb)	8	107150640	107187471	36832	1	ENSMUSG00000031924	ENSMUST00000034400	0	66427	Cyb5b	cytochrome b5 type B
11	107382030	107382330	301	*	3.43576	4.36755	0	4.16693	3.40867e-06	0.000603154	Promoter (4-5kb)	11	107386983	107388971	1989	1	ENSMUSG00000087683	ENSMUST00000129139	-4653
8	83389871	83390171	301	*	6.04054	6.50302	5.35573	1.10239	3.56107e-06	0.000625382	Promoter (<=1kb)	8	83389878	83426831	36954	1	ENSMUSG00000002190	ENSMUST00000109831	0	12745	Clgn	calmegin
15	8110704	8111004	301	*	3.17151	4.14461	0	5.2457	3.59098e-06	0.000625929	Intron (ENSMUST00000163765/ENSMUSG00000022142, intron 1 of 34)	15	8109336	8157036	47701	1	ENSMUSG00000022142	ENSMUST00000230017	1368	170762	Nup155	nucleoporin 155
8	86884792	86885092	301	*	6.58107	7.00484	5.97849	0.982372	3.72752e-06	0.000644917	5' UTR	8	86841139	86885258	44120	2	ENSMUSG00000031652	ENSMUST00000034074	166	80750	N4bp1	NEDD4 binding protein 1
8	94857729	94858029	301	*	6.64918	7.07061	6.05135	0.975357	3.86053e-06	0.000663017	Promoter (<=1kb)	8	94857632	94863541	5910	1	ENSMUSG00000031783	ENSMUST00000212124	97	20021	Polr2c	polymerase (RNA) II (DNA directed) polypeptide C
8	107293545	107293845	301	*	6.2711	6.71528	5.62602	1.04482	3.96931e-06	0.000676723	Promoter (<=1kb)	8	107293559	107372178	78620	1	ENSMUSG00000003847	ENSMUST00000125721	0	54446	Nfat5	nuclear factor of activated T cells 5
2	33463952	33464252	301	*	2.9687	3.9687	0	6.9592	4.13722e-06	0.000697688	Intron (ENSMUST00000028125/ENSMUSG00000026788, intron 2 of 2)	2	33454619	33465082	10464	2	ENSMUSG00000026788	ENSMUST00000155198	830	71834	Zbtb43	zinc finger and BTB domain containing 43
16	20375030	20375330	301	*	2.97211	3.97211	0	6.96258	4.15202e-06	0.000697688	Exon (ENSMUST00000079158/ENSMUSG00000022822, exon 16 of 30)	16	20368877	20376642	7766	2	ENSMUSG00000022822	ENSMUST00000127582	1312	27416	Abcc5	ATP-binding cassette, sub-family C (CFTR/MRP), member 5
8	69271101	69271401	301	*	5.80739	6.29726	5.06003	1.19164	4.25627e-06	0.000710098	Promoter (<=1kb)	8	69271094	69293726	22633	1	ENSMUSG00000079038	ENSMUST00000211805	7	211135	D130040H23Rik	RIKEN cDNA D130040H23 gene
19	8943172	8943472	301	*	3.27356	4.22294	0	4.53013	4.35894e-06	0.000717551	Promoter (<=1kb)	19	8944034	8947136	3103	1	ENSMUSG00000071646	ENSMUST00000132463	-562	23942	Mta2	metastasis-associated gene family, member 2
16	32128052	32128352	301	*	3.88917	4.68026	1.99813	2.60289	4.36239e-06	0.000717551	Distal Intergenic	16	32108865	32113743	4879	1	ENSMUSG00000086146	ENSMUST00000125829	19187
7	98193912	98194212	301	*	4.41645	3.22168	5.0609	-1.86765	4.41229e-06	0.000720685	Exon (ENSMUST00000098278/ENSMUSG00000074004, exon 2 of 2)	7	98192417	98199481	7065	2	ENSMUSG00000074004	ENSMUST00000098278	5269	272411	B3gnt6	UDP-GlcNAc:betaGal beta-1,3-N-acetylglucosaminyltransferase 6 (core 3 synthase)
8	122565104	122565404	301	*	5.26892	5.86908	4.22233	1.5978	4.45691e-06	0.000722917	Promoter (2-3kb)	8	122568015	122573128	5114	1	ENSMUSG00000006585	ENSMUST00000006760	-2611	67177	Cdt1	chromatin licensing and DNA replication factor 1
8	80738663	80738963	301	*	6.85837	7.26439	6.29127	0.929454	4.72869e-06	0.000757701	Exon (ENSMUST00000043359/ENSMUSG00000031715, exon 1 of 24)	8	80705485	80739425	33941	2	ENSMUSG00000031715	ENSMUST00000122807	462	93762	Smarca5	SWI/SNF related, matrix associated, actin dependent regulator of chromatin, subfamily a, member 5
10	61355882	61356182	301	*	3.92538	4.73954	1.87689	2.77925	4.73624e-06	0.000757701	Promoter (3-4kb)	10	61359666	61361407	1742	1	ENSMUSG00000112256	ENSMUST00000219025	-3484
18	56727022	56727322	301	*	3.63989	4.51958	0.996265	3.40242	4.84913e-06	0.000770483	Promoter (1-2kb)	18	56728441	56733456	5016	1	ENSMUSG00000024590	ENSMUST00000128651	-1119	16906	Lmnb1	lamin B1
12	109053165	109053465	301	*	4.67432	3.62637	5.27492	-1.68097	4.90756e-06	0.000774499	5' UTR	12	109037652	109053581	15930	2	ENSMUSG00000040867	ENSMUST00000185745	116	380785	Begain	brain-enriched guanylate kinase-associated
17	47571282	47571582	301	*	4.71846	5.34635	3.58146	1.71205	5.14194e-06	0.000806042	Intron (ENSMUST00000182129/ENSMUSG00000034165, intron 1 of 5)	17	47593436	47598174	4739	1	ENSMUSG00000034165	ENSMUST00000182281	-21854	12445	Ccnd3	cyclin D3
12	112106886	112107186	301	*	2.90525	0	3.90525	-6.93851	5.1855e-06	0.000807452	Promoter (<=1kb)	12	112106886	112113537	6652	1	ENSMUSG00000037686	ENSMUST00000221091	0	104816	Aspg	asparaginase
3	65109403	65109703	301	*	2.90356	0	3.90356	-6.93683	5.44921e-06	0.000842895	Promoter (<=1kb)	3	65109384	65378219	268836	1	ENSMUSG00000027827	ENSMUST00000049230	19	16497	Kcnab1	potassium voltage-gated channel, shaker-related subfamily, beta member 1
15	51989385	51989685	301	*	2.94266	3.94266	0	6.93338	5.65959e-06	0.000869677	Intron (ENSMUST00000022927/ENSMUSG00000022314, intron 1 of 13)	15	51973837	51991510	17674	2	ENSMUSG00000022314	ENSMUST00000226529	1825	19357	Rad21	RAD21 cohesin complex component
11	48849536	48849836	301	*	3.09115	0	4.0627	-5.23779	5.80611e-06	0.000886361	Exon (ENSMUST00000109213/ENSMUSG00000040350, exon 7 of 7)	11	48847902	48852209	4308	1	ENSMUSG00000040350	ENSMUST00000131270	1634	94089	Trim7	tripartite motif-containing 7
7	133088796	133089096	301	*	3.41218	4.34281	0	4.14237	5.85839e-06	0.000888535	Intron (ENSMUST00000124096/ENSMUSG00000030849, intron 1 of 6)	7	133025720	133111791	86072	2	ENSMUSG00000030970	ENSMUST00000155996	22695	13017	Ctbp2	C-terminal binding protein 2
10	62597296	62597596	301	*	3.50119	4.39108	0.734652	3.51965	5.98768e-06	0.000902285	Intron (ENSMUST00000045866/ENSMUSG00000020075, intron 2 of 14)	10	62580251	62602281	22031	2	ENSMUSG00000020075	ENSMUST00000045866	4685	56200	Ddx21	DExD box helicase 21
8	70594538	70594838	301	*	6.39791	6.82035	5.79801	0.978175	6.0501e-06	0.000905848	Promoter (<=1kb)	8	70594727	70595757	1031	1	ENSMUSG00000019139	ENSMUST00000211501	0	71780	Isyna1	myo-inositol 1-phosphate synthase A1
5	118437412	118437712	301	*	3.27039	4.21969	0	4.52787	6.1227e-06	0.000910652	Distal Intergenic	5	118418727	118418818	92	2	ENSMUSG00000093041	ENSMUST00000175300	-18594
5	137610405	137610705	301	*	5.10311	5.6655	4.16878	1.4479	6.16017e-06	0.000910652	Promoter (<=1kb)	5	137605105	137610474	5370	2	ENSMUSG00000029718	ENSMUST00000197912	0	18542	Pcolce	procollagen C-endopeptidase enhancer protein
5	81794526	81794826	301	*	2.90994	0	3.90994	-6.94317	6.41389e-06	0.000939077	3' UTR	5	81791561	81793595	2035	1	ENSMUSG00000037605	ENSMUST00000201803	2965	319387	Adgrl3	adhesion G protein-coupled receptor L3
17	29463698	29463998	301	*	4.96806	5.55362	3.96628	1.53733	6.43286e-06	0.000939077	Intron (ENSMUST00000234231/ENSMUSG00000117427, intron 1 of 3)	17	29462619	29464155	1537	2	ENSMUSG00000097125	ENSMUST00000235107	157
8	90828887	90829187	301	*	5.99553	6.45276	5.32231	1.0855	6.50463e-06	0.000942158	Promoter (<=1kb)	8	90828856	90850181	21326	1	ENSMUSG00000056608	ENSMUST00000209531	31	109151	Chd9	chromodomain helicase DNA binding protein 9
12	112999994	113000294	301	*	6.09712	5.47257	6.53155	-1.09937	6.53464e-06	0.000942158	Promoter (<=1kb)	12	112999964	113001926	1963	1	ENSMUSG00000097100	ENSMUST00000180971	30
8	86745570	86745870	301	*	6.62514	7.04117	6.03821	0.959052	6.72936e-06	0.00096428	Promoter (<=1kb)	8	86745699	86746603	905	1	ENSMUSG00000074178	ENSMUST00000098532	0
8	70172383	70172683	301	*	5.69189	6.19108	4.92226	1.22289	6.79645e-06	0.000967956	Promoter (<=1kb)	8	70172405	70183667	11263	1	ENSMUSG00000002342	ENSMUST00000182715	0	234371	Tmem161a	transmembrane protein 161A
8	126422565	126422865	301	*	6.49296	6.91698	5.88985	0.983061	7.15118e-06	0.00100969	Promoter (<=1kb)	8	126422528	126425345	2818	1	ENSMUSG00000051671	ENSMUST00000211868	37	67892	Coa6	cytochrome c oxidase assembly factor 6
7	118111161	118111461	301	*	4.29611	4.98364	2.93571	1.98811	7.21269e-06	0.00100969	Intron (ENSMUST00000131374/ENSMUSG00000008683, intron 3 of 4)	7	118109663	118115228	5566	2	ENSMUSG00000008683	ENSMUST00000134270	3767	267019	Rps15a	ribosomal protein S15A
2	173291815	173292115	301	*	2.90818	3.90818	0	6.89918	7.21916e-06	0.00100969	Distal Intergenic	2	173276698	173278428	1731	1	ENSMUSG00000087600	ENSMUST00000150185	15117
19	8715009	8715309	301	*	3.54997	4.44308	0.742357	3.56374	7.31698e-06	0.00101728	Promoter (<=1kb)	19	8709766	8714433	4668	2	ENSMUSG00000010095	ENSMUST00000206797	-576	17254	Slc3a2	solute carrier family 3 (activators of dibasic and neutral amino acid transport), member 2
8	54529440	54529740	301	*	6.23603	6.67247	5.60728	1.02075	7.40607e-06	0.00101935	Promoter (<=1kb)	8	54529580	54583637	54058	1	ENSMUSG00000031519	ENSMUST00000209937	0	76294	Asb5	ankyrin repeat and SOCs box-containing 5
8	75109761	75110061	301	*	6.68765	7.09997	6.10812	0.948015	7.41914e-06	0.00101935	Exon (ENSMUST00000164309/ENSMUSG00000005410, exon 2 of 17)	8	75109624	75127688	18065	1	ENSMUSG00000005410	ENSMUST00000212811	137	17218	Mcm5	minichromosome maintenance complex component 5
8	70352799	70353099	301	*	7.03977	7.44142	6.48122	0.916672	7.52997e-06	0.00102634	5' UTR	8	70331525	70353211	21687	2	ENSMUSG00000058301	ENSMUST00000215817	112	19704	Upf1	UPF1 regulator of nonsense transcripts homolog (yeast)
5	134440940	134441240	301	*	2.91067	3.91067	0	6.90165	7.5579e-06	0.00102634	Intron (ENSMUST00000111244/ENSMUSG00000023079, intron 1 of 29)	5	134448574	134448672	99	1	ENSMUSG00000076320	ENSMUST00000102365	-7334
11	120253026	120253326	301	*	4.17091	4.87516	2.73922	2.07318	7.68871e-06	0.00103623	Intron (ENSMUST00000122148/ENSMUSG00000039741, intron 2 of 27)	11	120236699	120292282	55584	1	ENSMUSG00000039741	ENSMUST00000118987	16327	268515	Bahcc1	BAH domain and coiled-coil containing 1
1	75427540	75427840	301	*	2.87808	0	3.87808	-6.91157	7.71952e-06	0.00103623	Exon (ENSMUST00000087122/ENSMUSG00000026207, exon 35 of 41)	1	75423510	75427623	4114	1	ENSMUSG00000026207	ENSMUST00000143679	4030	11790	Speg	SPEG complex locus
2	152686271	152686571	301	*	3.38871	4.29391	0.413723	3.71941	7.76434e-06	0.0010363	Promoter (<=1kb)	2	152687035	152687946	912	1	ENSMUSG00000042814	ENSMUST00000062148	-464	66405	Mcts2	malignant T cell amplified sequence 2
1	86530877	86531177	301	*	4.29604	4.99859	2.87181	2.06586	7.84129e-06	0.00103781	Downstream (<=300bp)	1	86526807	86530209	3403	1	ENSMUSG00000026238	ENSMUST00000188533	4070	19231	Ptma	prothymosin alpha
1	136627173	136627473	301	*	2.90607	3.90607	0	6.89708	7.86457e-06	0.00103781	Exon (ENSMUST00000047734/ENSMUSG00000041483, exon 2 of 2)	1	136624901	136630053	5153	1	ENSMUSG00000041483	ENSMUST00000112046	2272	226442	Zfp281	zinc finger protein 281
8	87780643	87780943	301	*	2.90346	3.90346	0	6.8945	7.92614e-06	0.00104006	Exon (ENSMUST00000165770/ENSMUSG00000045333, exon 2 of 6)	8	87783147	87803823	20677	2	ENSMUSG00000045333	ENSMUST00000174249	22880	94187	Zfp423	zinc finger protein 423
8	84066920	84067220	301	*	5.58699	6.09638	4.79251	1.25755	8.00951e-06	0.00104471	Promoter (<=1kb)	8	84065236	84067287	2052	2	ENSMUSG00000056753	ENSMUST00000071067	67
18	77042311	77042611	301	*	4.05804	4.7889	2.5032	2.2187	8.05099e-06	0.00104471	Intron (ENSMUST00000126153/ENSMUSG00000025420, intron 1 of 15)	18	76977149	77047243	70095	2	ENSMUSG00000025420	ENSMUST00000135029	4632	71206	Katnal2	katanin p60 subunit A-like 2
7	102289078	102289378	301	*	3.41464	4.32146	0.415664	3.74488	8.13614e-06	0.00104992	Intron (ENSMUST00000033289/ENSMUSG00000030987, intron 1 of 11)	7	102268327	102435900	167574	1	ENSMUSG00000030987	ENSMUST00000211457	20751	20866	Stim1	stromal interaction molecule 1
8	120532229	120532529	301	*	2.902	3.902	0	6.89304	8.4491e-06	0.00108432	Promoter (3-4kb)	8	120535857	120579480	43624	1	ENSMUSG00000031822	ENSMUST00000120493	-3328	382034	Gse1	genetic suppressor element 1, coiled-coil protein
12	111814268	111814568	301	*	5.89572	5.2861	6.32293	-1.07696	8.71464e-06	0.00111077	Promoter (<=1kb)	12	111814241	111825325	11085	1	ENSMUSG00000021286	ENSMUST00000221488	27	68520	Zfyve21	zinc finger, FYVE domain containing 21
11	100374216	100374516	301	*	4.70825	5.30822	3.66226	1.59402	8.75036e-06	0.00111077	Promoter (<=1kb)	11	100371059	100374125	3067	2	ENSMUSG00000001552	ENSMUST00000151476	-91	16480	Jup	junction plakoglobin
2	168978073	168978373	301	*	4.04523	4.77339	2.50351	2.20295	9.15061e-06	0.0011553	Promoter (<=1kb)	2	168978268	168978906	639	1	ENSMUSG00000086348	ENSMUST00000140241	0	75508	1700017J07Rik	RIKEN cDNA 1700017J07 gene
19	44299081	44299381	301	*	3.09138	4.06283	0	5.1598	9.2371e-06	0.00115995	Promoter (3-4kb)	19	44303171	44303231	61	1	ENSMUSG00000093315	ENSMUST00000175574	-3790	100628619	Mir5114	microRNA 5114
11	74773074	74773374	301	*	3.11308	4.08506	0	5.1867	9.30084e-06	0.00116171	Intron (ENSMUST00000010698/ENSMUSG00000010554, intron 1 of 10)	11	74770925	74817894	46970	1	ENSMUSG00000010554	ENSMUST00000092912	2149	67493	Mettl16	methyltransferase like 16
17	35161649	35161949	301	*	3.08279	4.05417	0	5.15611	9.5738e-06	0.00118598	Exon (ENSMUST00000025253/ENSMUSG00000024393, exon 4 of 31)	17	35162563	35162696	134	2	ENSMUSG00000064853	ENSMUST00000082919	747	115488838	Gm23442	predicted gene, 23442
8	123341585	123341885	301	*	4.85819	5.44827	3.84273	1.55479	9.5967e-06	0.00118598	Intron (ENSMUST00000127664/ENSMUSG00000092329, intron 1 of 15)	8	123350251	123369515	19265	1	ENSMUSG00000010154	ENSMUST00000212404	-8366	234857	Spire2	spire type actin nucleation factor 2
8	88949678	88949978	301	*	4.47132	5.10269	3.32238	1.72538	9.74124e-06	0.00119751	Distal Intergenic	8	89024735	89024831	97	1	ENSMUSG00000099078	ENSMUST00000183771	-74757	102465899	Mir8110	microRNA 8110
12	108702201	108702501	301	*	4.37123	3.11581	5.03218	-1.94342	1.00956e-05	0.00123231	Promoter (<=1kb)	12	108688239	108702297	14059	2	ENSMUSG00000021263	ENSMUST00000167978	0	70059	Degs2	delta(4)-desaturase, sphingolipid 2
3	129661252	129661552	301	*	2.87911	3.87911	0	6.87036	1.01299e-05	0.00123231	Distal Intergenic	3	129678337	129681546	3210	2	ENSMUSG00000028017	ENSMUST00000197250	19994	13645	Egf	epidermal growth factor
12	70969448	70969748	301	*	3.37404	0.417816	4.27796	-3.78081	1.05709e-05	0.00127929	Promoter (4-5kb)	12	70974621	70996347	21727	1	ENSMUSG00000060073	ENSMUST00000160027	-4873	19167	Psma3	proteasome subunit alpha 3
8	117847540	117847840	301	*	3.47883	4.36681	0.736308	3.49389	1.06589e-05	0.0012833	Distal Intergenic	8	117802062	117803234	1173	1	ENSMUSG00000074065	ENSMUST00000098368	45478
2	27740180	27740480	301	*	3.7772	4.58982	1.73978	2.76271	1.09569e-05	0.00131241	Promoter (<=1kb)	2	27740201	27748671	8471	1	ENSMUSG00000015846	ENSMUST00000148756	0	20181	Rxra	retinoid X receptor alpha
14	65172266	65172566	301	*	3.94345	4.75934	1.88223	2.79366	1.12132e-05	0.00133626	Promoter (<=1kb)	14	65172355	65185432	13078	1	ENSMUSG00000114693	ENSMUST00000223930	0	105245784	Gm41177	predicted gene, 41177
10	41451754	41452054	301	*	3.54591	4.41722	0.995225	3.30168	1.13681e-05	0.00134784	Exon (ENSMUST00000080771/ENSMUSG00000019826, exon 2 of 7)	10	41450435	41453468	3034	1	ENSMUSG00000019826	ENSMUST00000216656	1319	268294	Zbtb24	zinc finger and BTB domain containing 24
4	106858966	106859266	301	*	3.56234	4.43525	0.994425	3.32039	1.14447e-05	0.00135007	Distal Intergenic	4	106841761	106847920	6160	2	ENSMUSG00000086940	ENSMUST00000151369	-11046
8	43300048	43300348	301	*	4.82337	5.41301	3.80926	1.55282	1.15875e-05	0.00136005	Intron (ENSMUST00000211248/ENSMUSG00000051176, intron 4 of 4)	8	43295063	43306936	11874	2	ENSMUSG00000051176	ENSMUST00000211248	6588	22702	Zfp42	zinc finger protein 42
8	72219800	72220100	301	*	5.89956	6.35298	5.23463	1.07329	1.17091e-05	0.00136655	Promoter (<=1kb)	8	72219764	72223430	3667	1	ENSMUSG00000003039	ENSMUST00000212117	36	67922	Fam32a	family with sequence similarity 32, member A
19	4003671	4003971	301	*	3.16843	0	4.11407	-4.50431	1.17599e-05	0.00136655	Promoter (<=1kb)	19	4003700	4006133	2434	1	ENSMUSG00000024871	ENSMUST00000127016	0	60425	Doc2g	double C2, gamma
17	30606182	30606482	301	*	4.14527	4.85999	2.66668	2.12924	1.20662e-05	0.00138594	Promoter (<=1kb)	17	30607056	30608265	1210	1	ENSMUSG00000117749	ENSMUST00000236095	-574
8	107133067	107133367	301	*	4.5574	5.18669	3.4156	1.71696	1.21015e-05	0.00138594	Distal Intergenic	8	107119110	107119892	783	1	ENSMUSG00000102271	ENSMUST00000193420	13957
14	99310069	99310369	301	*	3.22434	4.17197	0	4.48052	1.21048e-05	0.00138594	Intron (ENSMUST00000005279/ENSMUSG00000005148, intron 3 of 3)	14	99299154	99305326	6173	1	ENSMUSG00000005148	ENSMUST00000226784	10915	12224	Klf5	Kruppel-like factor 5
8	46151786	46152086	301	*	6.19636	6.62487	5.58407	0.996364	1.24533e-05	0.00141476	Promoter (<=1kb)	8	46151771	46170191	18421	1	ENSMUSG00000031631	ENSMUST00000154040	15	66756	Cfap97	cilia and flagella associated protein 97
8	69183889	69184189	301	*	4.63528	5.24852	3.54697	1.64862	1.24777e-05	0.00141476	Promoter (<=1kb)	8	69182160	69184205	2046	2	ENSMUSG00000036306	ENSMUST00000184961	16	211134	Lzts1	leucine zipper, putative tumor suppressor 1
16	97610754	97611054	301	*	3.42384	0.41804	4.33111	-3.83342	1.27745e-05	0.00144142	Promoter (<=1kb)	16	97591437	97610969	19533	2	ENSMUSG00000000385	ENSMUST00000232141	0	50528	Tmprss2	transmembrane protease, serine 2
8	95176999	95177299	301	*	3.68028	4.52198	1.41387	3.00831	1.29812e-05	0.00145092	Intron (ENSMUST00000212424/ENSMUSG00000031788, intron 1 of 4)	8	95110249	95182791	72543	2	ENSMUSG00000031788	ENSMUST00000212424	5492	16582	Kifc3	kinesin family member C3
8	83973016	83973316	301	*	6.60246	7.0044	6.04335	0.917194	1.30075e-05	0.00145092	Promoter (<=1kb)	8	83972993	83996443	23451	1	ENSMUSG00000005469	ENSMUST00000005606	23	18747	Prkaca	protein kinase, cAMP dependent, catalytic, alpha
10	60811480	60811780	301	*	2.83905	3.83905	0	6.83064	1.30542e-05	0.00145092	Exon (ENSMUST00000218180/ENSMUSG00000112592, exon 1 of 1)	10	60808660	60814323	5664	2	ENSMUSG00000112592	ENSMUST00000218180	2543
8	111299851	111300151	301	*	6.57538	6.97351	6.02366	0.905981	1.31072e-05	0.00145092	Promoter (<=1kb)	8	111279368	111300191	20824	2	ENSMUSG00000033596	ENSMUST00000212958	40	234736	Rfwd3	ring finger and WD repeat domain 3
11	117598889	117599189	301	*	3.80859	4.62645	1.73282	2.80605	1.32378e-05	0.00145846	Distal Intergenic	11	117611247	117613857	2611	1	ENSMUSG00000054418	ENSMUST00000155384	-12058
8	57321392	57321692	301	*	4.70186	5.30023	3.66087	1.58745	1.3452e-05	0.00146886	Promoter (<=1kb)	8	57304265	57321228	16964	2	ENSMUSG00000100510	ENSMUST00000223675	-164	102636514	Hand2os1	Hand2, opposite strand 1
8	72322573	72322873	301	*	4.00061	4.73791	2.41401	2.25521	1.34579e-05	0.00146886	Distal Intergenic	8	72319033	72321656	2624	1	ENSMUSG00000055148	ENSMUST00000067912	3540	16598	Klf2	Kruppel-like factor 2 (lung)
10	128544549	128544849	301	*	3.58755	4.44062	1.21922	3.11297	1.39183e-05	0.00151204	Exon (ENSMUST00000040572/ENSMUSG00000039810, exon 3 of 3)	10	128545080	128547639	2560	2	ENSMUSG00000039810	ENSMUST00000152539	2790	103284	Zc3h10	zinc finger CCCH type containing 10
4	138706965	138707265	301	*	3.54021	4.41082	0.997035	3.29352	1.42215e-05	0.00153251	Distal Intergenic	4	138724792	138746132	21341	1	ENSMUSG00000028750	ENSMUST00000105808	-17527	18781	Pla2g2c	phospholipase A2, group IIC
16	41533245	41533545	301	*	3.85646	2.22411	4.60271	-2.38981	1.42379e-05	0.00153251	Promoter (<=1kb)	16	41533419	41539253	5835	1	ENSMUSG00000061080	ENSMUST00000187185	0	268890	Lsamp	limbic system-associated membrane protein
5	114090370	114090670	301	*	3.27574	0.0023078	4.19914	-4.07683	1.47615e-05	0.00158158	Intron (ENSMUST00000202603/ENSMUSG00000029592, intron 1 of 3)	5	114054534	114091367	36834	2	ENSMUSG00000042078	ENSMUST00000150106	697	68666	Svop	SV2 related protein
2	160655548	160655848	301	*	5.41602	5.91557	4.64555	1.22338	1.50923e-05	0.00160964	Intron (ENSMUST00000109468/ENSMUSG00000070544, intron 2 of 20)	2	160645980	160650107	4128	1	ENSMUSG00000070544	ENSMUST00000133262	9568	21969	Top1	topoisomerase (DNA) I
17	56326577	56326877	301	*	3.4836	4.34847	1.00014	3.2285	1.52361e-05	0.00161554	Intron (ENSMUST00000139679/ENSMUSG00000024201, intron 1 of 5)	17	56326091	56402859	76769	1	ENSMUSG00000024201	ENSMUST00000086835	486	193796	Kdm4b	lysine (K)-specific demethylase 4B
2	165807753	165808053	301	*	5.52457	6.00833	4.79148	1.17069	1.5286e-05	0.00161554	Exon (ENSMUST00000109266/ENSMUSG00000039671, exon 14 of 22)	2	165769186	165771262	2077	1	ENSMUSG00000017897	ENSMUST00000128280	38567	14049	Eya2	EYA transcriptional coactivator and phosphatase 2
7	133005209	133005509	301	*	2.83877	3.83877	0	6.83036	1.55239e-05	0.0016333	Intron (ENSMUST00000124096/ENSMUSG00000030849, intron 2 of 6)	7	132987578	133015248	27671	2	ENSMUSG00000030970	ENSMUST00000169570	9739	13017	Ctbp2	C-terminal binding protein 2
8	79711416	79711716	301	*	6.15004	6.58137	5.53192	1.00493	1.56211e-05	0.00163615	Promoter (<=1kb)	8	79686206	79711670	25465	2	ENSMUSG00000058355	ENSMUST00000211509	0	24015	Abce1	ATP-binding cassette, sub-family E (OABP), member 1
13	73328125	73328425	301	*	5.88484	6.34786	5.19884	1.10384	1.57286e-05	0.00164006	Promoter (<=1kb)	13	73319879	73328452	8574	2	ENSMUSG00000021606	ENSMUST00000147407	27	407785	Ndufs6	NADH:ubiquinone oxidoreductase core subunit S6
9	108562557	108562857	301	*	3.03314	4.00351	0	5.10598	1.59033e-05	0.00164168	Promoter (<=1kb)	9	108563135	108565394	2260	1	ENSMUSG00000062867	ENSMUST00000194904	-278	23918	Impdh2	inosine monophosphate dehydrogenase 2
8	70158571	70158871	301	*	5.37452	5.87348	4.60548	1.22124	1.59254e-05	0.00164168	Intron (ENSMUST00000163756/ENSMUSG00000079033, intron 1 of 8)	8	70152781	70167487	14707	1	ENSMUSG00000079033	ENSMUST00000110141	5790	17259	Mef2b	myocyte enhancer factor 2B
9	61911926	61912226	301	*	3.68339	4.50451	1.58317	2.82873	1.6047e-05	0.00164168	Distal Intergenic	9	61913284	61914542	1259	2	ENSMUSG00000007892	ENSMUST00000008036	2316	56040	Rplp1	ribosomal protein, large, P1
11	84914382	84914682	301	*	3.37227	4.27619	0.416058	3.69952	1.60574e-05	0.00164168	Exon (ENSMUST00000144552/ENSMUSG00000020526, exon 3 of 5)	11	84911505	84916305	4801	2	ENSMUSG00000020526	ENSMUST00000127838	1623	448850	Znhit3	zinc finger, HIT type 3
7	127934308	127934608	301	*	3.41302	4.31984	0.414103	3.7448	1.60956e-05	0.00164168	Exon (ENSMUST00000153110/ENSMUSG00000070371, exon 2 of 5)	7	127932902	127935429	2528	2	ENSMUSG00000070371	ENSMUST00000141385	821	77613	Prss36	protease, serine 36
8	111033936	111034236	301	*	6.27595	6.71319	5.64555	1.02325	1.6814e-05	0.0017075	Promoter (<=1kb)	8	111033916	111046743	12828	1	ENSMUSG00000031960	ENSMUST00000142770	20	234734	Aars	alanyl-tRNA synthetase
3	88334155	88334455	301	*	4.02685	4.76965	2.41239	2.2884	1.69106e-05	0.00170855	Promoter (<=1kb)	3	88329046	88334268	5223	2	ENSMUSG00000001420	ENSMUST00000107553	0	71913	Tmem79	transmembrane protein 79
2	31887212	31887512	301	*	4.10216	2.5056	4.84143	-2.35268	1.69707e-05	0.00170855	Promoter (<=1kb)	2	31887291	31945246	57956	1	ENSMUSG00000026840	ENSMUST00000138325	0	23928	Lamc3	laminin gamma 3
12	113156382	113156682	301	*	5.83368	5.2479	6.24912	-1.04134	1.77429e-05	0.00177863	Promoter (<=1kb)	12	113156421	113164544	8124	1	ENSMUSG00000037466	ENSMUST00000049271	0	104732	Tedc1	tubulin epsilon and delta complex 1
12	108835584	108835884	301	*	5.03794	4.16689	5.57722	-1.4465	1.78248e-05	0.0017792	Promoter (<=1kb)	12	108825873	108835883	10011	2	ENSMUSG00000021265	ENSMUST00000021693	0	214663	Slc25a29	solute carrier family 25 (mitochondrial carrier, palmitoylcarnitine transporter), member 29
8	70691480	70691780	301	*	4.54578	5.17144	3.41634	1.70102	1.81425e-05	0.00180321	Distal Intergenic	8	70698949	70700616	1668	1	ENSMUSG00000071076	ENSMUST00000095267	-7169	16478	Jund	jun D proto-oncogene
8	84840153	84840453	301	*	6.13919	6.58781	5.48462	1.05853	1.89246e-05	0.00187285	Intron (ENSMUST00000003911/ENSMUSG00000003813, intron 1 of 8)	8	84838299	84840636	2338	2	ENSMUSG00000003813	ENSMUST00000125711	183	19358	Rad23a	RAD23 homolog A, nucleotide excision repair protein
1	74036882	74037182	301	*	4.30854	2.93435	4.99939	-2.08948	1.90035e-05	0.00187285	Promoter (<=1kb)	1	73993163	74037133	43971	2	ENSMUSG00000055322	ENSMUST00000187281	0	21961	Tns1	tensin 1
2	169288262	169288562	301	*	4.28845	5.0028	2.81151	2.12925	1.91655e-05	0.00188088	Distal Intergenic	2	169234991	169237770	2780	1	ENSMUSG00000085369	ENSMUST00000152494	53271
18	77045408	77045708	301	*	3.34507	4.2469	0.418982	3.66753	2.0898e-05	0.00204232	Intron (ENSMUST00000126153/ENSMUSG00000025420, intron 1 of 15)	18	76977149	77047243	70095	2	ENSMUSG00000025420	ENSMUST00000135029	1535	71206	Katnal2	katanin p60 subunit A-like 2
8	81014471	81014771	301	*	6.95322	7.33863	6.42577	0.869337	2.10823e-05	0.00205174	5' UTR	8	80998213	81014913	16701	2	ENSMUSG00000038250	ENSMUST00000211538	142	74841	Usp38	ubiquitin specific peptidase 38
8	106603675	106603975	301	*	6.43901	6.84365	5.87464	0.924982	2.15714e-05	0.00209064	Promoter (<=1kb)	8	106604143	106653919	49777	1	ENSMUSG00000000303	ENSMUST00000136580	-168	12550	Cdh1	cadherin 1
3	121578321	121578621	301	*	4.27235	4.92187	3.05933	1.80481	2.16839e-05	0.00209285	Distal Intergenic	3	121459528	121532404	72877	2	ENSMUSG00000039865	ENSMUST00000039197	-45917	213603	Slc44a3	solute carrier family 44, member 3
8	85071731	85072031	301	*	6.60464	6.99207	6.07337	0.874907	2.18893e-05	0.00209722	Promoter (<=1kb)	8	85071757	85075162	3406	1	ENSMUSG00000060038	ENSMUST00000078665	0	330817	Dhps	deoxyhypusine synthase
12	105563708	105564008	301	*	3.11847	0	4.06193	-4.44693	2.19087e-05	0.00209722	Intron (ENSMUST00000001652/ENSMUSG00000021070, intron 1 of 2)	12	105563226	105595237	32012	1	ENSMUSG00000021070	ENSMUST00000001652	482	12062	Bdkrb2	bradykinin receptor, beta 2
10	108285302	108285602	301	*	3.85938	4.66558	1.86739	2.71508	2.2086e-05	0.00210557	Distal Intergenic	10	108268570	108284475	15906	1	ENSMUSG00000019907	ENSMUST00000219559	16732	17931	Ppp1r12a	protein phosphatase 1, regulatory subunit 12A
5	137599260	137599560	301	*	3.00323	3.97286	0	5.07027	2.22308e-05	0.00210897	Intron (ENSMUST00000111007/ENSMUSG00000037221, intron 3 of 4)	5	137600083	137600691	609	2	ENSMUSG00000037221	ENSMUST00000196366	1131	68929	Mospd3	motile sperm domain containing 3
15	98985423	98985723	301	*	4.01555	4.73792	2.50141	2.16974	2.23023e-05	0.00210897	Promoter (<=1kb)	15	98985894	98989281	3388	1	ENSMUSG00000097587	ENSMUST00000180490	-171	75951	4930578M01Rik	RIKEN cDNA 4930578M01 gene
11	65157946	65158246	301	*	3.90411	4.69716	2.00048	2.61738	2.24793e-05	0.00211714	Intron (ENSMUST00000047463/ENSMUSG00000033389, intron 1 of 20)	11	65151910	65159890	7981	2	ENSMUSG00000020548	ENSMUST00000020855	1644
3	83570149	83570449	301	*	3.3413	4.24347	0.410384	3.67258	2.29576e-05	0.00214941	Intron (ENSMUST00000185938/ENSMUSG00000101334, intron 1 of 4)	3	83555363	83574122	18760	2	ENSMUSG00000101334	ENSMUST00000185938	3673	69460	1700028M03Rik	RIKEN cDNA 1700028M03 gene
10	63192386	63192686	301	*	2.99974	3.96937	0	5.07017	2.3006e-05	0.00214941	Exon (ENSMUST00000095580/ENSMUSG00000020067, exon 2 of 20)	10	63115795	63203952	88158	2	ENSMUSG00000020067	ENSMUST00000095580	11266	68802	Mypn	myopalladin
2	28505161	28505461	301	*	2.77477	3.77477	0	6.76694	2.32143e-05	0.00215311	Promoter (<=1kb)	2	28506095	28506475	381	1	ENSMUSG00000063611	ENSMUST00000074761	-634
12	118301632	118301932	301	*	5.35777	4.64356	5.83333	-1.22816	2.33019e-05	0.00215311	Promoter (<=1kb)	12	118261792	118301440	39649	2	ENSMUSG00000025323	ENSMUST00000221844	-192	20688	Sp4	trans-acting transcription factor 4
4	91374799	91375099	301	*	4.20868	2.99769	4.85764	-1.88594	2.33222e-05	0.00215311	Intron (ENSMUST00000107120/ENSMUSG00000008489, intron 1 of 7)	4	91258666	91376307	117642	2	ENSMUSG00000008489	ENSMUST00000176469	1208	15569	Elavl2	ELAV like RNA binding protein 1
5	123997797	123998097	301	*	2.73297	0	3.73297	-6.76772	2.36442e-05	0.00217424	Exon (ENSMUST00000000939/ENSMUSG00000000915, exon 18 of 32)	5	123996852	123996930	79	1	ENSMUSG00000098454	ENSMUST00000185154	945	102465625	Mir7032	microRNA 7032
8	119910961	119911261	301	*	6.77001	7.1578	6.23804	0.876096	2.47658e-05	0.00226845	Intron (ENSMUST00000144458/ENSMUSG00000031826, intron 1 of 13)	8	119910857	119951934	41078	1	ENSMUSG00000031826	ENSMUST00000108982	104	22224	Usp10	ubiquitin specific peptidase 10
8	95142113	95142413	301	*	5.96882	6.4096	5.33095	1.0338	2.54804e-05	0.00231984	Promoter (<=1kb)	8	95126556	95142503	15948	2	ENSMUSG00000031788	ENSMUST00000212554	90	16582	Kifc3	kinesin family member C3
9	123156882	123157182	301	*	3.58954	1.21685	4.44307	-3.20053	2.55254e-05	0.00231984	3' UTR	9	123162371	123162503	133	1	ENSMUSG00000077659	ENSMUST00000104471	-5189	115485699	Gm23323	predicted gene, 23323
6	125426571	125426871	301	*	4.23689	4.9235	2.88031	1.98261	2.57019e-05	0.00232682	Distal Intergenic	6	125462116	125463024	909	2	ENSMUSG00000030342	ENSMUST00000140024	36153	12527	Cd9	CD9 antigen
3	131084958	131085258	301	*	2.7693	3.7693	0	6.76152	2.61637e-05	0.00235078	Distal Intergenic	3	131110471	131224356	113886	1	ENSMUSG00000027985	ENSMUST00000029611	-25213	16842	Lef1	lymphoid enhancer binding factor 1
8	106870731	106871031	301	*	5.97828	6.41643	5.34595	1.02567	2.62443e-05	0.00235078	Promoter (<=1kb)	8	106870836	106881197	10362	1	ENSMUSG00000031910	ENSMUST00000176144	0	15118	Has3	hyaluronan synthase 3
18	38584044	38584344	301	*	3.14212	4.08674	0	4.3992	2.62686e-05	0.00235078	Distal Intergenic	18	38582850	38583455	606	1	ENSMUSG00000118296	ENSMUST00000236625	1194	100418251	Gm19100	proteasome (prosome, macropain) subunit, alpha type 2 pseudogene
6	117917673	117917973	301	*	5.75259	6.23293	5.02741	1.15994	2.6714e-05	0.00238153	Promoter (<=1kb)	6	117916531	117917722	1192	2	ENSMUSG00000107608	ENSMUST00000203822	0
8	84629810	84630110	301	*	3.71856	4.50222	1.87433	2.54568	2.68815e-05	0.00238735	Exon (ENSMUST00000238701/ENSMUSG00000034656, exon 42 of 49)	8	84638991	84639434	444	1	ENSMUSG00000034656	ENSMUST00000130507	-8881	12286	Cacna1a	calcium channel, voltage-dependent, P/Q type, alpha 1A subunit
8	95545633	95545933	301	*	4.77256	5.33331	3.84284	1.44007	2.80274e-05	0.00247968	Exon (ENSMUST00000041569/ENSMUSG00000036598, exon 6 of 9)	8	95551793	95552302	510	1	ENSMUSG00000110577	ENSMUST00000212067	-5860
11	97742967	97743267	301	*	3.48568	4.35118	0.995877	3.2354	2.89426e-05	0.00255099	Intron (ENSMUST00000018691/ENSMUSG00000018547, intron 1 of 9)	11	97715157	97744704	29548	2	ENSMUSG00000018547	ENSMUST00000018691	1437	108083	Pip4k2b	phosphatidylinositol-5-phosphate 4-kinase, type II, beta
8	123643621	123643921	301	*	4.08573	4.80532	2.58469	2.15525	2.95677e-05	0.00259629	Intron (ENSMUST00000127664/ENSMUSG00000092329, intron 1 of 15)	8	123653929	123655985	2057	1	ENSMUSG00000039960	ENSMUST00000136615	-10008	69581	Rhou	ras homolog family member U
12	111966623	111966923	301	*	5.67177	5.04264	6.1084	-1.10539	3.00227e-05	0.00261036	Promoter (<=1kb)	12	111961376	111966894	5519	2	ENSMUSG00000021290	ENSMUST00000222874	0	70257	Atp5mpl	ATP synthase membrane subunit 6.8PL
4	138677837	138678137	301	*	4.20969	4.87473	2.93873	1.87664	3.00553e-05	0.00261036	Distal Intergenic	4	138581630	138635884	54255	2	ENSMUSG00000028753	ENSMUST00000105812	-41953	75718	Vwa5b1	von Willebrand factor A domain containing 5B1
18	82758845	82759145	301	*	3.82569	4.58679	2.11358	2.39777	3.00632e-05	0.00261036	Promoter (<=1kb)	18	82754505	82759041	4537	2	ENSMUSG00000101773	ENSMUST00000188435	0	76961	2210420H20Rik	RIKEN cDNA 2210420H20 gene
11	4463818	4464118	301	*	2.73445	3.73445	0	6.72699	3.06621e-05	0.00265013	Distal Intergenic	11	4424248	4441105	16858	2	ENSMUSG00000020419	ENSMUST00000130174	-22713	75828	Hormad2	HORMA domain containing 2
8	61243222	61243522	301	*	2.74165	3.74165	0	6.73413	3.07482e-05	0.00265013	Intron (ENSMUST00000034060/ENSMUSG00000031642, intron 2 of 11)	8	61224244	61386641	162398	1	ENSMUSG00000031642	ENSMUST00000209611	18978	59009	Sh3rf1	SH3 domain containing ring finger 1
8	124231710	124232010	301	*	6.45726	6.84587	5.92373	0.878213	3.12221e-05	0.00268108	Intron (ENSMUST00000127664/ENSMUSG00000092329, intron 1 of 15)	8	124231508	124334310	102803	1	ENSMUSG00000089704	ENSMUST00000142578	202	108148	Galnt2	polypeptide N-acetylgalactosaminyltransferase 2
17	26095075	26095375	301	*	5.86133	6.2902	5.24829	0.996983	3.15241e-05	0.0026971	Promoter (<=1kb)	17	26091736	26095473	3738	2	ENSMUSG00000024177	ENSMUST00000236547	98	56520	Nme4	NME/NM23 nucleoside diphosphate kinase 4
8	122523695	122523995	301	*	4.81502	5.36854	3.90545	1.41312	3.16564e-05	0.00269854	Promoter (3-4kb)	8	122520568	122520674	107	2	ENSMUSG00000065080	ENSMUST00000083146	-3021	115487007	Gm26497	predicted gene, 26497
8	70139679	70139979	301	*	6.26297	6.6755	5.683	0.948235	3.29306e-05	0.00279695	Promoter (<=1kb)	8	70139707	70145535	5829	1	ENSMUSG00000002345	ENSMUST00000123976	0	72368	Borcs8	BLOC-1 related complex subunit 8
4	128789818	128790118	301	*	3.62514	1.58531	4.43809	-2.84381	3.30623e-05	0.00279795	Promoter (<=1kb)	4	128789321	128790092	772	2	ENSMUSG00000028799	ENSMUST00000138371	0	230761	Zfp362	zinc finger protein 362
8	68793985	68794285	301	*	6.24261	6.65831	5.65634	0.957659	3.3381e-05	0.00281473	Promoter (<=1kb)	8	68794014	68829408	35395	1	ENSMUSG00000031864	ENSMUST00000070713	0	70885	Ints10	integrator complex subunit 10
8	104641448	104641748	301	*	6.11482	6.52223	5.545	0.932823	3.36962e-05	0.00283109	Promoter (<=1kb)	8	104639841	104641699	1859	2	ENSMUSG00000031879	ENSMUST00000163140	0	68523	Ciao2b	cytosolic iron-sulfur assembly component 2B
1	88460507	88460807	301	*	3.71819	4.52335	1.73351	2.7028	3.44023e-05	0.00288005	Intron (ENSMUST00000186556/ENSMUSG00000100908, intron 1 of 1)	1	88459683	88465558	5876	1	ENSMUSG00000100908	ENSMUST00000186556	824
8	72492274	72492574	301	*	6.66815	7.07008	6.10905	0.917228	3.47398e-05	0.00289792	Promoter (<=1kb)	8	72480641	72492614	11974	2	ENSMUSG00000019731	ENSMUST00000152080	40	270066	Slc35e1	solute carrier family 35, member E1
2	127788617	127788917	301	*	4.73944	3.87408	5.27657	-1.43724	3.4951e-05	0.00290516	Promoter (<=1kb)	2	127740732	127788854	48123	2	ENSMUSG00000027378	ENSMUST00000028857	0	53885	Nphp1	nephronophthisis 1 (juvenile) homolog (human)
15	88712091	88712391	301	*	4.1137	4.78755	2.80858	1.91783	3.53388e-05	0.00292698	Intron (ENSMUST00000109381/ENSMUSG00000022387, intron 6 of 12)	15	88713433	88717040	3608	2	ENSMUSG00000022387	ENSMUST00000139515	4649	223770	Brd1	bromodomain containing 1
16	30935070	30935370	301	*	2.7449	3.7449	0	6.73736	3.55284e-05	0.00293228	Exon (ENSMUST00000232539/ENSMUSG00000116581, exon 1 of 4)	16	30913331	30935629	22299	2	ENSMUSG00000116581	ENSMUST00000232539	259
8	70906324	70906624	301	*	6.6006	6.98249	6.07972	0.858996	3.61605e-05	0.00296416	Promoter (<=1kb)	8	70906262	70912997	6736	1	ENSMUSG00000019261	ENSMUST00000213001	62	270058	Map1s	microtubule-associated protein 1S
2	35446762	35447062	301	*	4.07068	4.77034	2.65905	2.04757	3.63465e-05	0.00296416	Promoter (<=1kb)	2	35423329	35445833	22505	2	ENSMUSG00000035778	ENSMUST00000130913	-929	14594	Ggta1	glycoprotein galactosyltransferase alpha 1, 3
3	121601113	121601413	301	*	4.22077	4.87201	3.00143	1.81218	3.63702e-05	0.00296416	Distal Intergenic	3	121637128	121643367	6240	2	ENSMUSG00000044522	ENSMUST00000198402	41954	100503044	A730020M07Rik	RIKEN cDNA A730020M07 gene
1	132269555	132269855	301	*	2.93984	3.90817	0	5.00951	3.64828e-05	0.00296416	Distal Intergenic	1	132274716	132280411	5696	2	ENSMUSG00000101549	ENSMUST00000185761	10556
8	84661881	84662181	301	*	6.82711	7.21301	6.29872	0.870682	3.65722e-05	0.00296416	3' UTR	8	84661331	84662854	1524	2	ENSMUSG00000053560	ENSMUST00000060427	673	15936	Ier2	immediate early response 2
11	93952849	93953149	301	*	3.83982	4.58339	2.22138	2.28944	3.6676e-05	0.00296416	Exon (ENSMUST00000021217/ENSMUSG00000020857, exon 3 of 5)	11	93949817	93955783	5967	2	ENSMUSG00000020857	ENSMUST00000072566	2634	18103	Nme2	NME/NM23 nucleoside diphosphate kinase 2
1	84869441	84869741	301	*	4.1028	4.82551	2.58707	2.17299	3.79163e-05	0.00305383	Exon (ENSMUST00000151737/ENSMUSG00000073633, exon 1 of 4)	1	84869151	84900487	31337	1	ENSMUSG00000073633	ENSMUST00000151737	290	66153	Fbxo36	F-box protein 36
12	108757687	108757987	301	*	5.08904	4.30036	5.59607	-1.33271	3.81324e-05	0.00306068	Distal Intergenic	12	108762032	108762970	939	2	ENSMUSG00000112971	ENSMUST00000222233	4983
5	149229280	149229580	301	*	4.78904	3.80542	5.3685	-1.59694	3.83825e-05	0.00306458	Promoter (1-2kb)	5	149231332	149237984	6653	1	ENSMUSG00000100783	ENSMUST00000189493	-1752
10	122448854	122449154	301	*	4.91563	4.11415	5.42784	-1.34988	3.84887e-05	0.00306458	Exon (ENSMUST00000020323/ENSMUSG00000020123, exon 1 of 2)	10	122448499	122453452	4954	1	ENSMUSG00000020123	ENSMUST00000020323	355	54140	Avpr1a	arginine vasopressin receptor 1A
8	89052497	89052797	301	*	5.42803	5.90913	4.7011	1.16167	3.86172e-05	0.00306458	Distal Intergenic	8	89027235	89044162	16928	2	ENSMUSG00000031665	ENSMUST00000034090	-8335	58198	Sall1	spalt like transcription factor 1
8	72270760	72271060	301	*	4.77245	5.33439	3.83939	1.44459	3.87058e-05	0.00306458	Distal Intergenic	8	72283698	72284154	457	2	ENSMUSG00000110443	ENSMUST00000212069	13094	105243218	Gm39197	predicted gene, 39197
12	91647320	91647620	301	*	3.69776	4.47803	1.87433	2.52163	3.89517e-05	0.00307363	Exon (ENSMUST00000052969/ENSMUSG00000020961, exon 5 of 7)	12	91615896	91617677	1782	2	ENSMUSG00000113943	ENSMUST00000222304	-29643
5	149184790	149185090	301	*	6.77362	6.32221	7.11694	-0.836317	3.91944e-05	0.00307642	Promoter (<=1kb)	5	149184781	149194094	9314	1	ENSMUSG00000041264	ENSMUST00000149896	9	231915	Uspl1	ubiquitin specific peptidase like 1
8	105566385	105566685	301	*	4.79125	5.34735	3.8745	1.42269	3.93721e-05	0.00307642	Promoter (<=1kb)	8	105566351	105578109	11759	1	ENSMUSG00000104168	ENSMUST00000192691	34
17	34906107	34906407	301	*	3.99848	4.77113	2.22053	2.4771	3.94586e-05	0.00307642	Exon (ENSMUST00000114033/ENSMUSG00000013787, exon 12 of 28)	17	34906002	34908558	2557	1	ENSMUSG00000013787	ENSMUST00000124846	105	110147	Ehmt2	euchromatic histone lysine N-methyltransferase 2
8	83955789	83956089	301	*	6.47314	6.86647	5.93064	0.891899	3.96087e-05	0.00307642	Promoter (<=1kb)	8	83955714	83967847	12134	1	ENSMUSG00000005470	ENSMUST00000124913	75	66929	Asf1b	anti-silencing function 1B histone chaperone
16	31299334	31299634	301	*	2.70379	3.70379	0	6.69663	3.96456e-05	0.00307642	Intron (ENSMUST00000130560/ENSMUSG00000022548, intron 5 of 5)	16	31297420	31303445	6026	2	ENSMUSG00000022548	ENSMUST00000156456	3811	11815	Apod	apolipoprotein D
11	49901915	49902215	301	*	5.84221	6.26795	5.2356	0.987417	3.98079e-05	0.00307879	Promoter (<=1kb)	11	49902161	49980994	78834	1	ENSMUSG00000020374	ENSMUST00000063444	0	74563	Rasgef1c	RasGEF domain family, member 1C
17	84499215	84499515	301	*	3.36838	4.24707	0.736229	3.37499	4.03363e-05	0.00310449	Distal Intergenic	17	84511895	84622138	110244	1	ENSMUSG00000040852	ENSMUST00000047206	-12380	213556	Plekhh2	pleckstrin homology domain containing, family H (with MyTH4 domain) member 2
12	110447431	110447731	301	*	5.20174	4.5031	5.67043	-1.20536	4.0534e-05	0.00310449	Intron (ENSMUST00000222276/ENSMUSG00000017843, intron 1 of 2)	12	110447307	110570911	123605	1	ENSMUSG00000017843	ENSMUST00000223168	124	26931	Ppp2r5c	protein phosphatase 2, regulatory subunit B', gamma
8	120634246	120634546	301	*	5.92244	6.34516	5.322	0.978388	4.0539e-05	0.00310449	Promoter (<=1kb)	8	120608602	120634492	25891	2	ENSMUSG00000043687	ENSMUST00000123927	0	68918	1190005I06Rik	RIKEN cDNA 1190005I06 gene
8	69903419	69903719	301	*	5.39331	5.86767	4.68183	1.13947	4.11368e-05	0.00313075	Promoter (<=1kb)	8	69887788	69902712	14925	2	ENSMUSG00000048967	ENSMUST00000180068	-707	234365	Yjefn3	YjeF N-terminal domain containing 3
12	102743722	102744022	301	*	6.04532	6.45531	5.47039	0.940411	4.1169e-05	0.00313075	Promoter (<=1kb)	12	102743762	102747561	3800	1	ENSMUSG00000046675	ENSMUST00000057416	0	320351	Tmem251	transmembrane protein 251
8	41239814	41240114	301	*	6.40001	6.80166	5.84146	0.916148	4.1284e-05	0.00313075	Promoter (<=1kb)	8	41239778	41332092	92315	1	ENSMUSG00000031592	ENSMUST00000211247	36	18536	Pcm1	pericentriolar material 1
3	121588944	121589244	301	*	4.04607	4.73882	2.66389	2.0114	4.26492e-05	0.00322381	Distal Intergenic	3	121637128	121643367	6240	2	ENSMUSG00000044522	ENSMUST00000198402	54123	100503044	A730020M07Rik	RIKEN cDNA A730020M07 gene
2	144262720	144263020	301	*	2.70682	3.70682	0	6.69964	4.38453e-05	0.00329299	Promoter (<=1kb)	2	144261589	144261726	138	2	ENSMUSG00000065725	ENSMUST00000083791	-994	115486130	Gm26165	predicted gene, 26165
5	137613191	137613491	301	*	3.43859	4.29953	0.994664	3.18526	4.38547e-05	0.00329299	Intron (ENSMUST00000196660/ENSMUSG00000106617, intron 1 of 1)	5	137607510	137613762	6253	2	ENSMUSG00000029718	ENSMUST00000155251	271	18542	Pcolce	procollagen C-endopeptidase enhancer protein
18	65631177	65631477	301	*	2.69835	3.69835	0	6.69124	4.39874e-05	0.00329299	Promoter (3-4kb)	18	65634793	65637470	2678	1	ENSMUSG00000117775	ENSMUST00000237947	-3316
6	87845488	87845788	301	*	3.39184	4.24739	1.00015	3.12804	4.43767e-05	0.0032992	5' UTR	6	87845530	87846317	788	2	ENSMUSG00000030057	ENSMUST00000204104	529	12785	Cnbp	cellular nucleic acid binding protein
10	95315535	95315835	301	*	3.17087	4.08855	0	3.89051	4.44138e-05	0.0032992	Promoter (<=1kb)	10	95312870	95314853	1984	2	ENSMUSG00000112744	ENSMUST00000219461	-682
8	64849661	64849961	301	*	5.91617	6.33582	5.32194	0.969113	4.4494e-05	0.0032992	Promoter (<=1kb)	8	64739848	64849924	110077	2	ENSMUSG00000031605	ENSMUST00000210166	0	77113	Klhl2	kelch-like 2, Mayven
14	8140047	8140347	301	*	4.46992	5.05867	3.45851	1.54698	4.47604e-05	0.00330844	Intron (ENSMUST00000036682/ENSMUSG00000033885, intron 7 of 17)	14	8135354	8140696	5343	1	ENSMUSG00000033885	ENSMUST00000224462	4693	218699	Pxk	PX domain containing serine/threonine kinase
19	24111287	24111587	301	*	2.70808	3.70808	0	6.70089	4.50263e-05	0.0033176	Exon (ENSMUST00000233027/ENSMUSG00000024812, exon 14 of 23)	19	24131315	24143082	11768	2	ENSMUSG00000024812	ENSMUST00000236570	31495	21873	Tjp2	tight junction protein 2
8	43305641	43305941	301	*	6.37196	6.7644	5.83115	0.88923	4.53706e-05	0.00333245	Intron (ENSMUST00000211248/ENSMUSG00000051176, intron 1 of 4)	8	43295063	43306936	11874	2	ENSMUSG00000051176	ENSMUST00000211248	995	22702	Zfp42	zinc finger protein 42
15	102999140	102999440	301	*	3.93635	2.50329	4.64092	-2.15538	4.56268e-05	0.00333765	Intron (ENSMUST00000174869/ENSMUSG00000022485, intron 1 of 1)	15	102998257	103010768	12512	1	ENSMUSG00000001661	ENSMUST00000173210	883	15425	Hoxc6	homeobox C6
2	93868893	93869193	301	*	3.94079	4.71989	2.12448	2.51937	4.57319e-05	0.00333765	Promoter (<=1kb)	2	93855361	93869157	13797	2	ENSMUSG00000075023	ENSMUST00000099690	0	381411	Accsl	1-aminocyclopropane-1-carboxylate synthase (non-functional)-like
8	60890431	60890731	301	*	6.15022	6.55052	5.5943	0.911905	4.587e-05	0.00333765	Promoter (<=1kb)	8	60890445	60907573	17129	1	ENSMUSG00000038005	ENSMUST00000149267	0	72612	Hpf1	histone PARylation factor 1
11	6605470	6605770	301	*	4.6073	3.66546	5.17235	-1.54003	4.63546e-05	0.00336244	5' UTR	11	6597823	6606053	8231	2	ENSMUSG00000041073	ENSMUST00000045713	283	192950	Nacad	NAC alpha domain containing
2	35282292	35282592	301	*	4.35732	4.98343	3.22634	1.70138	4.65447e-05	0.00336321	Promoter (<=1kb)	2	35282380	35307892	25513	1	ENSMUSG00000026879	ENSMUST00000028239	0	227753	Gsn	gelsolin
4	139197113	139197413	301	*	3.27329	4.17014	0.416165	3.59407	4.66533e-05	0.00336321	Promoter (1-2kb)	4	139199267	139262097	62831	1	ENSMUSG00000028745	ENSMUST00000145368	-1854	12345	Capzb	capping actin protein of muscle Z-line subunit beta
12	111485763	111486063	301	*	4.23383	3.11599	4.85603	-1.76779	4.70181e-05	0.00337196	Promoter (<=1kb)	12	111484609	111485823	1215	2	ENSMUSG00000010529	ENSMUST00000010673	0	212539	Gm266	predicted gene 266
15	79209351	79209651	301	*	4.53453	5.13055	3.50081	1.57677	4.70633e-05	0.00337196	Promoter (<=1kb)	15	79209311	79217383	8073	1	ENSMUSG00000075555	ENSMUST00000148028	40	100041655	Gm10863	predicted gene 10863
18	65588920	65589220	301	*	4.5146	5.10391	3.50148	1.54955	4.72221e-05	0.00337298	Intron (ENSMUST00000235822/ENSMUSG00000042439, intron 3 of 10)	18	65583937	65623193	39257	1	ENSMUSG00000042439	ENSMUST00000182973	4983	328977	Zfp532	zinc finger protein 532
5	147159540	147159840	301	*	2.70909	3.70909	0	6.70189	4.79264e-05	0.00341286	Distal Intergenic	5	147188696	147190947	2252	1	ENSMUSG00000053129	ENSMUST00000065382	-28856	14842	Gsx1	GS homeobox 1
14	84447794	84448094	301	*	4.04529	2.73889	4.71945	-2.0027	4.86095e-05	0.00344238	Promoter (<=1kb)	14	84448507	84479227	30721	1	ENSMUSG00000035566	ENSMUST00000226362	-413	219228	Pcdh17	protocadherin 17
12	105031759	105032059	301	*	5.64587	5.0455	6.06856	-1.06276	4.86357e-05	0.00344238	Exon (ENSMUST00000222812/ENSMUSG00000113722, exon 1 of 2)	12	105030617	105032277	1661	2	ENSMUSG00000113722	ENSMUST00000222812	218	69434	Snhg10	small nucleolar RNA host gene 10
12	112929044	112929344	301	*	5.64901	5.07279	6.05966	-1.0267	4.90288e-05	0.00345492	Exon (ENSMUST00000075827/ENSMUSG00000002799, exon 2 of 26)	12	112907819	112929776	21958	2	ENSMUSG00000002799	ENSMUST00000075827	432	16450	Jag2	jagged 2
11	103386896	103387196	301	*	3.08156	4.02377	0	4.33693	4.91087e-05	0.00345492	Exon (ENSMUST00000041272/ENSMUSG00000034247, exon 5 of 12)	11	103366617	103394768	28152	2	ENSMUSG00000034247	ENSMUST00000184350	7572	353047	Plekhm1	pleckstrin homology domain containing, family M (with RUN domain) member 1
8	121116319	121116619	301	*	5.80283	6.2279	5.19761	0.985301	4.95524e-05	0.00347504	5' UTR	8	121116171	121118895	2725	1	ENSMUSG00000046714	ENSMUST00000054691	148	14234	Foxc2	forkhead box C2
17	29158948	29159248	301	*	4.05748	4.75435	2.65777	2.03294	4.96923e-05	0.00347504	3' UTR	17	29159034	29159505	472	2	ENSMUSG00000024008	ENSMUST00000234157	257	240058	Cpne5	copine V
4	117367625	117367925	301	*	4.76329	5.32231	3.83843	1.4335	4.98463e-05	0.0034754	Intron (ENSMUST00000030439/ENSMUSG00000028677, intron 2 of 14)	4	117271927	117375457	103531	2	ENSMUSG00000028677	ENSMUST00000094853	7532	66743	Rnf220	ring finger protein 220
3	129575900	129576200	301	*	2.69417	3.69417	0	6.68709	5.03062e-05	0.00349703	Intron (ENSMUST00000199910/ENSMUSG00000041220, intron 1 of 3)	3	129552380	129628319	75940	1	ENSMUSG00000041220	ENSMUST00000198369	23520	170439	Elovl6	ELOVL family member 6, elongation of long chain fatty acids (yeast)
12	111712769	111713069	301	*	5.99069	5.44581	6.38526	-0.979979	5.07825e-05	0.00351967	Promoter (<=1kb)	12	111709904	111712927	3024	2	ENSMUSG00000049792	ENSMUST00000160576	0	70369	Bag5	BCL2-associated athanogene 5
2	129226808	129227108	301	*	2.66289	3.66289	0	6.65613	5.09829e-05	0.0035231	Promoter (<=1kb)	2	129205958	129226438	20481	2	ENSMUSG00000087528	ENSMUST00000127525	-370
8	41133498	41133798	301	*	6.51613	6.8916	6.00719	0.840604	5.14193e-05	0.00354277	Promoter (<=1kb)	8	40990914	41133726	142813	2	ENSMUSG00000045636	ENSMUST00000059115	0	102103	Mtus1	mitochondrial tumor suppressor 1
15	98594416	98594716	301	*	2.87686	0	3.84371	-5.01685	5.17944e-05	0.00355812	Promoter (<=1kb)	15	98592707	98594234	1528	2	ENSMUSG00000022994	ENSMUST00000228596	-182	11512	Adcy6	adenylate cyclase 6
12	84613833	84614133	301	*	3.16721	4.08449	0.00163467	3.88348	5.31591e-05	0.00364116	Exon (ENSMUST00000222581/ENSMUSG00000021240, exon 4 of 19)	12	84611444	84615387	3944	2	ENSMUSG00000021240	ENSMUST00000222889	1254	19300	Abcd4	ATP-binding cassette, sub-family D (ALD), member 4
8	84969656	84969956	301	*	5.87448	6.30358	5.26098	0.997699	5.36278e-05	0.00365881	Promoter (<=1kb)	8	84969694	84971125	1432	1	ENSMUSG00000005161	ENSMUST00000138748	0	21672	Prdx2	peroxiredoxin 2
2	26459992	26460292	301	*	4.75456	5.3099	3.83993	1.41964	5.38999e-05	0.00365881	Exon (ENSMUST00000028288/ENSMUSG00000026923, exon 34 of 34)	2	26462218	26462747	530	2	ENSMUSG00000026923	ENSMUST00000132941	2455	18128	Notch1	notch 1
11	77906186	77906486	301	*	3.79023	4.56479	2.00102	2.48515	5.39773e-05	0.00365881	Distal Intergenic	11	77880615	77894096	13482	2	ENSMUSG00000017453	ENSMUST00000017597	-12090	19193	Pipox	pipecolic acid oxidase
11	115266814	115267114	301	*	4.61728	3.69856	5.17409	-1.50903	5.40433e-05	0.00365881	5' UTR	11	115249169	115267243	18075	2	ENSMUSG00000020734	ENSMUST00000106554	129	14813	Grin2c	glutamate receptor, ionotropic, NMDA2C (epsilon 3)
10	95893208	95893508	301	*	3.05892	4.00021	0	4.31366	5.43318e-05	0.00366771	Promoter (<=1kb)	10	95893443	95897257	3815	1	ENSMUSG00000112400	ENSMUST00000218392	0
8	84656478	84656778	301	*	6.03074	6.44823	5.44086	0.96278	5.46773e-05	0.00367212	Distal Intergenic	8	84661331	84662854	1524	2	ENSMUSG00000053560	ENSMUST00000060427	6076	15936	Ier2	immediate early response 2
8	95137594	95137894	301	*	4.39159	4.9999	3.31922	1.62612	5.47115e-05	0.00367212	Promoter (<=1kb)	8	95129209	95137898	8690	2	ENSMUSG00000031788	ENSMUST00000212786	4	16582	Kifc3	kinesin family member C3
8	123948950	123949250	301	*	6.68635	7.05571	6.18861	0.823451	5.55788e-05	0.00371501	Promoter (<=1kb)	8	123919836	123949255	29420	2	ENSMUSG00000039509	ENSMUST00000212133	5	234865	Nup133	nucleoporin 133
1	164020116	164020416	301	*	3.05763	3.99872	0	4.30866	5.56686e-05	0.00371501	Distal Intergenic	1	164031960	164032348	389	1	ENSMUSG00000103960	ENSMUST00000195691	-11544
8	84686548	84686848	301	*	5.71158	6.15174	5.07502	1.03143	5.64427e-05	0.00374557	5' UTR	8	84686339	84691322	4984	1	ENSMUSG00000001909	ENSMUST00000177531	209	212528	Trmt1	tRNA methyltransferase 1
5	106453405	106453705	301	*	4.43784	3.50189	5.00081	-1.531	5.64473e-05	0.00374557	Exon (ENSMUST00000086795/ENSMUSG00000034384, exon 3 of 3)	5	106452523	106458166	5644	2	ENSMUSG00000034384	ENSMUST00000086795	4461	104382	Barhl2	BarH like homeobox 2
6	7689326	7689626	301	*	3.58571	4.39387	1.58005	2.72182	5.72855e-05	0.00377904	5' UTR	6	7685182	7692222	7041	2	ENSMUSG00000029752	ENSMUST00000139596	2596	27053	Asns	asparagine synthetase
11	4803150	4803450	301	*	2.66329	3.66329	0	6.65652	5.73714e-05	0.00377904	Intron (ENSMUST00000109910/ENSMUSG00000009073, intron 7 of 15)	11	4794431	4815240	20810	2	ENSMUSG00000009073	ENSMUST00000155600	11790	18016	Nf2	neurofibromin 2
8	57512951	57513251	301	*	5.17129	5.66478	4.41535	1.20214	5.74371e-05	0.00377904	Exon (ENSMUST00000067925/ENSMUSG00000054717, exon 3 of 5)	8	57512548	57513207	660	1	ENSMUSG00000054717	ENSMUST00000211198	403	97165	Hmgb2	high mobility group box 2
4	98857662	98857962	301	*	2.67049	3.67049	0	6.66366	5.82645e-05	0.00382271	Distal Intergenic	4	98855614	98856034	421	1	ENSMUSG00000084188	ENSMUST00000117920	2048	102639194	Gm12851	predicted gene 12851
7	19816791	19817091	301	*	5.35138	5.83198	4.62559	1.15982	5.85154e-05	0.00382779	Intron (ENSMUST00000137373/ENSMUSG00000087593, intron 1 of 1)	7	19816553	19818625	2073	1	ENSMUSG00000087593	ENSMUST00000137373	238	102638408	Gm16174	predicted gene 16174
2	152693583	152693883	301	*	3.56884	4.39617	1.42073	2.87645	5.86697e-05	0.00382779	Intron (ENSMUST00000125366/ENSMUSG00000019188, intron 8 of 11)	2	152691839	152696241	4403	1	ENSMUSG00000019188	ENSMUST00000129439	1744	14950	H13	histocompatibility 13
15	84189725	84190025	301	*	3.42147	4.30475	0.735845	3.43269	5.92192e-05	0.00385288	Promoter (2-3kb)	15	84192241	84217267	25027	1	ENSMUSG00000022437	ENSMUST00000023071	-2216	68653	Samm50	SAMM50 sorting and assembly machinery component
3	153906301	153906601	301	*	3.19466	4.11326	0.006624	3.90714	5.95794e-05	0.00386554	Promoter (<=1kb)	3	153857149	153906138	48990	2	ENSMUSG00000005493	ENSMUST00000005630	-163	55993	Msh4	mutS homolog 4
8	47990036	47990336	301	*	6.67705	7.04442	6.18295	0.81782	5.99223e-05	0.00387702	5' UTR	8	47823959	47990551	166593	2	ENSMUSG00000031563	ENSMUST00000057561	215	52357	Wwc2	WW, C2 and coiled-coil domain containing 2
8	79608463	79608763	301	*	3.80897	4.54569	2.22521	2.24815	6.04533e-05	0.00390057	Distal Intergenic	8	79639618	79677724	38107	1	ENSMUSG00000036990	ENSMUST00000173078	-30855	73945	Otud4	OTU domain containing 4
11	102948614	102948914	301	*	4.26228	3.17288	4.87586	-1.73143	6.06729e-05	0.00390396	Promoter (1-2kb)	11	102939264	102946688	7425	2	ENSMUSG00000045532	ENSMUST00000057849	-1926	23829	C1ql1	complement component 1, q subcomponent-like 1
18	65567318	65567618	301	*	3.61003	4.44405	1.4081	2.93655	6.2596e-05	0.00401664	Distal Intergenic	18	65579912	65689443	109532	1	ENSMUSG00000042439	ENSMUST00000235822	-12294	328977	Zfp532	zinc finger protein 532
7	25246422	25246722	301	*	4.32131	4.93813	3.2213	1.66128	6.2963e-05	0.00402911	Intron (ENSMUST00000045847/ENSMUSG00000040857, intron 1 of 3)	7	25245447	25250730	5284	2	ENSMUSG00000040857	ENSMUST00000116343	4008	13875	Erf	Ets2 repressor factor
15	79847287	79847587	301	*	4.91726	5.47247	4.00301	1.41993	6.35059e-05	0.00405275	Distal Intergenic	15	79843163	79846763	3601	1	ENSMUSG00000115971	ENSMUST00000230701	4124
8	122376636	122376936	301	*	6.58886	6.96707	6.07485	0.848455	6.37121e-05	0.00405483	Promoter (<=1kb)	8	122376643	122417360	40718	1	ENSMUSG00000017478	ENSMUST00000093073	0	76014	Zc3h18	zinc finger CCCH-type containing 18
5	122994479	122994779	301	*	3.24499	4.14001	0.412174	3.56808	6.40562e-05	0.00406565	Promoter (4-5kb)	5	122871705	122989823	118119	2	ENSMUSG00000029475	ENSMUST00000121739	-4656	30841	Kdm2b	lysine (K)-specific demethylase 2B
8	84249287	84249587	301	*	6.26447	6.64987	5.73702	0.868748	6.4673e-05	0.00409368	Exon (ENSMUST00000019506/ENSMUSG00000019362, exon 2 of 3)	8	84246238	84249719	3482	2	ENSMUSG00000019362	ENSMUST00000019506	132	101966	D8Ertd738e	DNA segment, Chr 8, ERATO Doi 738, expressed
11	97806225	97806525	301	*	4.54288	5.11361	3.58476	1.47679	6.50175e-05	0.00410436	Promoter (<=1kb)	11	97806310	97806900	591	1	ENSMUSG00000038366	ENSMUST00000138919	0	16796	Lasp1	LIM and SH3 protein 1
8	70760636	70760936	301	*	6.54995	6.91948	6.05192	0.823805	6.54645e-05	0.00412144	Promoter (<=1kb)	8	70759009	70760837	1829	2	ENSMUSG00000035559	ENSMUST00000213010	0	234384	Mpv17l2	MPV17 mitochondrial membrane protein-like 2
8	33903610	33903910	301	*	3.96978	4.68236	2.50095	2.1149	6.6478e-05	0.004174	Intron (ENSMUST00000053251/ENSMUSG00000031586, intron 1 of 7)	8	33863007	33891764	28758	2	ENSMUSG00000031586	ENSMUST00000182871	-11846	19663	Rbpms	RNA binding protein gene with multiple splicing
9	40235020	40235320	301	*	2.62508	3.62508	0	6.6187	6.7278e-05	0.0042129	Distal Intergenic	9	40269217	40291618	22402	1	ENSMUSG00000049281	ENSMUST00000049941	-33897	235281	Scn3b	sodium channel, voltage-gated, type III, beta
19	53322876	53323176	301	*	3.16933	4.08689	0	3.8884	6.77697e-05	0.00422998	Intron (ENSMUST00000003870/ENSMUSG00000025025, intron 1 of 5)	19	53320598	53325725	5128	2	ENSMUSG00000118369	ENSMUST00000236942	2549
3	34765229	34765529	301	*	3.16881	4.08634	0	3.88785	6.79129e-05	0.00422998	Distal Intergenic	3	34772075	34782346	10272	1	ENSMUSG00000106519	ENSMUST00000197492	-6546	102638436	Gm38509	predicted gene, 38509
8	84965587	84965887	301	*	6.20483	6.60769	5.64392	0.919506	6.86757e-05	0.00426611	Promoter (<=1kb)	8	84957974	84965961	7988	2	ENSMUSG00000052926	ENSMUST00000122931	74	69724	Rnaseh2a	ribonuclease H2, large subunit
8	48136941	48137241	301	*	3.52956	4.37588	1.2226	3.04528	6.91541e-05	0.00428443	Intron (ENSMUST00000174278/ENSMUSG00000031562, intron 3 of 5)	8	48110211	48153233	43023	1	ENSMUSG00000031562	ENSMUST00000174379	26730	320685	Dctd	dCMP deaminase
3	96419318	96419618	301	*	3.54699	4.39543	1.22111	3.06619	7.00078e-05	0.00432585	Promoter (3-4kb)	3	96422733	96422897	165	1	ENSMUSG00000095513	ENSMUST00000083374	-3115
8	71476328	71476628	301	*	6.09529	6.49855	5.53358	0.920575	7.07631e-05	0.00435491	3' UTR	8	71470411	71476098	5688	1	ENSMUSG00000074247	ENSMUST00000146677	5917	66498	Dda1	DET1 and DDB1 associated 1
11	115830897	115831197	301	*	4.61527	5.17083	3.70004	1.41966	7.08509e-05	0.00435491	Promoter (<=1kb)	11	115831968	115844883	12916	1	ENSMUSG00000020782	ENSMUST00000172552	-771	217325	Llgl2	LLGL2 scribble cell polarity complex component
8	123809053	123809353	301	*	3.5889	4.41984	1.41204	2.90858	7.1809e-05	0.00440221	Intron (ENSMUST00000127664/ENSMUSG00000092329, intron 1 of 15)	8	123806068	123834485	28418	1	ENSMUSG00000019478	ENSMUST00000117702	2985	19341	Rab4a	RAB4A, member RAS oncogene family
13	113777673	113777973	301	*	2.62928	3.62928	0	6.62286	7.38628e-05	0.00450615	Distal Intergenic	13	113764615	113764921	307	1	ENSMUSG00000114781	ENSMUST00000225989	13058
6	120274532	120274832	301	*	3.0304	3.97034	0	4.28053	7.38903e-05	0.00450615	Intron (ENSMUST00000057283/ENSMUSG00000041372, intron 1 of 19)	6	120203094	120294559	91466	2	ENSMUSG00000041372	ENSMUST00000057283	19727	330406	B4galnt3	beta-1,4-N-acetyl-galactosaminyl transferase 3
2	168159051	168159351	301	*	4.24836	4.87524	3.11475	1.70376	7.45465e-05	0.0045241	Promoter (4-5kb)	2	168152603	168154513	1911	2	ENSMUSG00000087648	ENSMUST00000129713	-4538	77017	E130018N17Rik	RIKEN cDNA E130018N17 gene
8	116732959	116733259	301	*	6.09183	6.50833	5.50393	0.959907	7.4572e-05	0.0045241	Promoter (<=1kb)	8	116574400	116732991	158592	2	ENSMUSG00000031758	ENSMUST00000109102	0	75796	Cdyl2	chromodomain protein, Y chromosome-like 2
8	56294520	56294820	301	*	4.51417	5.11743	3.45783	1.60621	7.612e-05	0.00460605	Promoter (<=1kb)	8	56294585	56321043	26459	1	ENSMUSG00000031613	ENSMUST00000034026	0	15446	Hpgd	hydroxyprostaglandin dehydrogenase 15 (NAD)
8	121950932	121951232	301	*	6.89366	7.25255	6.41483	0.794245	7.64806e-05	0.00461005	Promoter (<=1kb)	8	121949674	121950645	972	2	ENSMUSG00000098184	ENSMUST00000182352	-287	115486886	Gm27011	predicted gene, 27011
12	117843818	117844118	301	*	5.55067	4.97024	5.96344	-1.03281	7.65809e-05	0.00461005	Promoter (<=1kb)	12	117843884	117873757	29874	1	ENSMUSG00000021175	ENSMUST00000176735	0	217946	Cdca7l	cell division cycle associated 7 like
8	48842802	48843102	301	*	5.6489	6.08696	5.01676	1.02481	7.68847e-05	0.00461644	Promoter (<=1kb)	8	48843665	48869016	25352	1	ENSMUSG00000100706	ENSMUST00000187946	-563
4	133103488	133103788	301	*	4.95886	5.48824	4.11383	1.32566	7.75167e-05	0.00464245	Distal Intergenic	4	133130505	133199756	69252	1	ENSMUSG00000028868	ENSMUST00000084241	-26717	242687	Wasf2	WASP family, member 2
8	121378959	121379259	301	*	3.72122	4.48364	2.00173	2.40375	7.78321e-05	0.00464942	Intron (ENSMUST00000127664/ENSMUSG00000092329, intron 1 of 15)	8	121256747	121356836	100090	2	ENSMUSG00000097384	ENSMUST00000181200	-22123
8	117436501	117436801	301	*	3.16829	4.08579	0	3.8873	8.00497e-05	0.00476969	Exon (ENSMUST00000166750/ENSMUSG00000034390, exon 10 of 21)	8	117423416	117459423	36008	1	ENSMUSG00000034390	ENSMUST00000212884	13085	74440	Cmip	c-Maf inducing protein
8	69716514	69716814	301	*	6.05631	6.46039	5.49303	0.922903	8.12791e-05	0.00482548	Promoter (<=1kb)	8	69705137	69716824	11688	2	ENSMUSG00000054648	ENSMUST00000238657	10	66869	Zfp869	zinc finger protein 869
2	180701922	180702222	301	*	5.79925	6.22268	5.19735	0.980348	8.13991e-05	0.00482548	Promoter (<=1kb)	2	180685024	180701992	16969	2	ENSMUSG00000038914	ENSMUST00000103054	0	23856	Dido1	death inducer-obliterator 1
12	108179892	108180192	301	*	5.99968	5.5122	6.36339	-0.891934	8.26453e-05	0.00488695	5' UTR	12	108179738	108203359	23622	1	ENSMUSG00000021258	ENSMUST00000101055	154	12454	Ccnk	cyclin K
16	94010825	94011125	301	*	3.52531	4.34851	1.40923	2.84044	8.35322e-05	0.00492692	Promoter (<=1kb)	16	94011441	94012236	796	1	ENSMUSG00000116947	ENSMUST00000231382	-316
2	17936152	17936452	301	*	3.52555	4.34789	1.41601	2.83313	8.42024e-05	0.00494155	Distal Intergenic	2	17996417	17996958	542	2	ENSMUSG00000062651	ENSMUST00000105001	60506	68231	H2al2a	H2A histone family member L2A
4	141285467	141285767	301	*	4.34659	4.95613	3.27025	1.6309	8.42033e-05	0.00494155	Distal Intergenic	4	141278439	141279794	1356	1	ENSMUSG00000085395	ENSMUST00000142429	7028	100503810	Gm13056	predicted gene 13056
8	88199580	88199880	301	*	5.17559	5.66196	4.43641	1.17839	8.54188e-05	0.00500032	Intron (ENSMUST00000066748/ENSMUSG00000036779, intron 1 of 11)	8	88199214	88259722	60509	1	ENSMUSG00000036779	ENSMUST00000118952	366	214627	Tent4b	terminal nucleotidyltransferase 4B
4	99569786	99570086	301	*	4.39192	4.99846	3.32519	1.61874	8.62379e-05	0.00503565	Intron (ENSMUST00000132108/ENSMUSG00000087332, intron 1 of 1)	4	99569500	99573011	3512	1	ENSMUSG00000087332	ENSMUST00000132108	286
11	77893188	77893488	301	*	4.34718	4.97239	3.21925	1.69744	8.75953e-05	0.0050997	Intron (ENSMUST00000017597/ENSMUSG00000017453, intron 1 of 7)	11	77880615	77894096	13482	2	ENSMUSG00000017453	ENSMUST00000017597	608	19193	Pipox	pipecolic acid oxidase
8	72319423	72319723	301	*	6.63327	7.00343	6.13406	0.825682	8.77715e-05	0.0050997	Exon (ENSMUST00000067912/ENSMUSG00000055148, exon 2 of 3)	8	72319033	72321656	2624	1	ENSMUSG00000055148	ENSMUST00000067912	390	16598	Klf2	Kruppel-like factor 2 (lung)
5	144679829	144680129	301	*	3.22621	4.11931	0.418544	3.54128	8.89928e-05	0.00515783	Distal Intergenic	5	144723627	144723797	171	2	ENSMUSG00000082524	ENSMUST00000121256	43668	108169117	Gm6272	predicted pseudogene 6272
8	84183704	84184004	301	*	6.18739	6.57074	5.66379	0.862778	8.96443e-05	0.00518272	Intron (ENSMUST00000211482/ENSMUSG00000056155, intron 1 of 1)	8	84173731	84185217	11487	2	ENSMUSG00000056155	ENSMUST00000211482	1213	244551	Nanos3	nanos C2HC-type zinc finger 3
1	165845048	165845348	301	*	3.69897	2.11715	4.4353	-2.32732	9.01435e-05	0.00519872	Promoter (<=1kb)	1	165844047	165844608	562	2	ENSMUSG00000102363	ENSMUST00000192693	-440
8	71371277	71371577	301	*	6.18395	6.60592	5.58503	0.976478	9.19343e-05	0.00526873	Promoter (<=1kb)	8	71371298	71374382	3085	1	ENSMUSG00000002396	ENSMUST00000110051	0	77090	Ocel1	occludin/ELL domain containing 1
15	77857901	77858201	301	*	4.93122	5.43839	4.14221	1.24778	9.19812e-05	0.00526873	Distal Intergenic	15	77760587	77842175	81589	2	ENSMUSG00000022443	ENSMUST00000016771	-15726	17886	Myh9	myosin, heavy polypeptide 9, non-muscle
7	3347474	3347774	301	*	4.46019	5.07538	3.36554	1.65556	9.20341e-05	0.00526873	Intron (ENSMUST00000092891/ENSMUSG00000069806, intron 4 of 5)	7	3338216	3366899	28684	1	ENSMUSG00000069806	ENSMUST00000203497	9258	81904	Cacng7	calcium channel, voltage-dependent, gamma subunit 7
5	31610399	31610699	301	*	3.64132	4.41155	1.87746	2.45244	9.36236e-05	0.00534662	Promoter (3-4kb)	5	31613939	31622644	8706	1	ENSMUSG00000106918	ENSMUST00000031024	-3240	66845	Mrpl33	mitochondrial ribosomal protein L33
8	70539586	70539886	301	*	6.19441	6.57634	5.67348	0.8587	9.49968e-05	0.0054118	Promoter (<=1kb)	8	70539688	70592858	53171	1	ENSMUSG00000070002	ENSMUST00000093454	0	13716	Ell	elongation factor RNA polymerase II
8	83954905	83955205	301	*	5.30547	5.77468	4.60564	1.12251	9.63022e-05	0.00547282	Promoter (<=1kb)	8	83932329	83955205	22877	2	ENSMUSG00000074219	ENSMUST00000098595	0	100126034	Gm10644	predicted gene 10644
7	45693968	45694268	301	*	3.50347	1.41914	4.32249	-2.8878	9.66122e-05	0.00547712	5' UTR	7	45677686	45694402	16717	2	ENSMUSG00000040364	ENSMUST00000040636	134	56546	Sec1	secretory blood group 1
8	107048353	107048653	301	*	6.70827	7.09296	6.18216	0.867111	9.71751e-05	0.00549052	Promoter (<=1kb)	8	107046520	107048614	2095	2	ENSMUSG00000078931	ENSMUST00000055316	0	68023	Pdf	peptide deformylase (mitochondrial)
8	95131417	95131717	301	*	4.14399	4.79043	2.94207	1.78939	9.75486e-05	0.00549052	Intron (ENSMUST00000212199/ENSMUSG00000110428, intron 1 of 1)	8	95126666	95134867	8202	1	ENSMUSG00000110428	ENSMUST00000212199	4751
8	110919992	110920292	301	*	6.42723	6.79607	5.93044	0.821773	9.75539e-05	0.00549052	Promoter (<=1kb)	8	110919958	110956987	37030	1	ENSMUSG00000031749	ENSMUST00000129639	34	20444	St3gal2	ST3 beta-galactoside alpha-2,3-sialyltransferase 2
8	94012239	94012539	301	*	6.18031	6.57041	5.64398	0.882206	9.80199e-05	0.00550349	Promoter (<=1kb)	8	93999215	94012127	12913	2	ENSMUSG00000031751	ENSMUST00000143265	-112	23802	Amfr	autocrine motility factor receptor
8	123805987	123806287	301	*	6.11214	6.50271	5.57492	0.883496	9.93292e-05	0.00556362	Promoter (<=1kb)	8	123806068	123834485	28418	1	ENSMUSG00000019478	ENSMUST00000117702	0	19341	Rab4a	RAB4A, member RAS oncogene family
8	120537212	120537512	301	*	6.20378	6.59084	5.67318	0.873489	0.000100427	0.00561167	Promoter (<=1kb)	8	120537429	120579326	41898	1	ENSMUSG00000031822	ENSMUST00000118136	0	382034	Gse1	genetic suppressor element 1, coiled-coil protein
8	84189666	84189966	301	*	3.43877	4.27412	1.22595	2.94084	0.000100969	0.00562046	Promoter (4-5kb)	8	84173731	84185217	11487	2	ENSMUSG00000056155	ENSMUST00000211482	-4449	244551	Nanos3	nanos C2HC-type zinc finger 3
8	71671233	71671533	301	*	6.35455	6.72383	5.85696	0.822946	0.000101138	0.00562046	Intron (ENSMUST00000030170/ENSMUSG00000034799, intron 1 of 43)	8	71629054	71671736	42683	2	ENSMUSG00000034799	ENSMUST00000177517	203	382018	Unc13a	unc-13 homolog A
6	125133207	125133507	301	*	4.54402	5.10176	3.62273	1.42742	0.000101306	0.00562046	Intron (ENSMUST00000044200/ENSMUSG00000038279, intron 2 of 15)	6	125132033	125134704	2672	1	ENSMUSG00000038279	ENSMUST00000204185	1174	110109	Nop2	NOP2 nucleolar protein
12	111574632	111574932	301	*	6.06193	5.57364	6.42609	-0.89327	0.000102376	0.00566632	Promoter (<=1kb)	12	111575014	111627152	52139	1	ENSMUSG00000007411	ENSMUST00000221448	-82	17169	Mark3	MAP/microtubule affinity regulating kinase 3
2	55437369	55437669	301	*	4.28557	3.32202	4.85818	-1.56668	0.000102634	0.00566717	Exon (ENSMUST00000067101/ENSMUSG00000026824, exon 2 of 4)	2	55437165	55598140	160976	1	ENSMUSG00000026824	ENSMUST00000112632	204	16519	Kcnj3	potassium inwardly-rectifying channel, subfamily J, member 3
8	90908624	90908924	301	*	5.91854	6.31506	5.3699	0.900577	0.000104919	0.00577009	Promoter (<=1kb)	8	90908614	90976950	68337	1	ENSMUSG00000056608	ENSMUST00000211403	10	109151	Chd9	chromodomain helicase DNA binding protein 9
8	77549352	77549652	301	*	6.23849	6.61441	5.72872	0.841621	0.000104991	0.00577009	Promoter (<=1kb)	8	77549397	77581338	31942	1	ENSMUSG00000037134	ENSMUST00000056237	0	102182	Prmt9	protein arginine methyltransferase 9
2	91931144	91931444	301	*	5.58051	6.00791	4.97049	0.992017	0.000106	0.00580564	Exon (ENSMUST00000111309/ENSMUSG00000027239, exon 2 of 5)	2	91929805	91931688	1884	2	ENSMUSG00000027239	ENSMUST00000111309	244	17242	Mdk	midkine
17	36981168	36981468	301	*	4.13027	4.77392	2.93837	1.77664	0.000106135	0.00580564	Promoter (<=1kb)	17	36977701	36981237	3537	2	ENSMUSG00000064308	ENSMUST00000039846	0	76797	2410137M14Rik	RIKEN cDNA 2410137M14 gene
7	34233712	34234012	301	*	5.32807	5.79092	4.64245	1.10209	0.000106413	0.0058072	Promoter (<=1kb)	7	34230420	34234102	3683	2	ENSMUSG00000086526	ENSMUST00000140881	90
17	73804912	73805212	301	*	4.89952	4.1409	5.39412	-1.28971	0.000106755	0.00581228	Promoter (<=1kb)	17	73804841	73832094	27254	1	ENSMUSG00000024065	ENSMUST00000024860	71	57440	Ehd3	EH-domain containing 3
8	84995680	84995980	301	*	4.15539	4.80695	2.93486	1.81302	0.00010736	0.00583165	Promoter (2-3kb)	8	84998491	85001428	2938	1	ENSMUSG00000052566	ENSMUST00000209652	-2511	170833	Hook2	hook microtubule tethering protein 2
8	15034144	15034444	301	*	3.3216	4.16942	1.0013	3.04947	0.000107929	0.00584896	Distal Intergenic	8	15032390	15032964	575	1	ENSMUSG00000055675	ENSMUST00000184243	1754	74901	Kbtbd11	kelch repeat and BTB (POZ) domain containing 11
4	43266924	43267224	301	*	2.99461	3.93301	0	4.24351	0.000110722	0.00598642	Promoter (<=1kb)	4	43267159	43344582	77424	1	ENSMUSG00000028457	ENSMUST00000056010	0	320571	Atp8b5	ATPase, class I, type 8B, member 5
4	106858122	106858422	301	*	4.71114	5.25002	3.84117	1.35872	0.000111358	0.00599668	Distal Intergenic	4	106841761	106847920	6160	2	ENSMUSG00000086940	ENSMUST00000151369	-10202
3	41587997	41588297	301	*	3.19743	4.08877	0.412461	3.51694	0.000111425	0.00599668	Promoter (3-4kb)	3	41591673	41600171	8499	1	ENSMUSG00000025764	ENSMUST00000195322	-3376	269424	Jade1	jade family PHD finger 1
8	121907361	121907661	301	*	6.54785	6.90844	6.06598	0.79875	0.000112093	0.00599851	Promoter (<=1kb)	8	121881150	121907694	26545	2	ENSMUSG00000040010	ENSMUST00000045557	33	20539	Slc7a5	solute carrier family 7 (cationic amino acid transporter, y+ system), member 5
8	122522849	122523149	301	*	4.45995	5.0458	3.45727	1.53541	0.000112371	0.00599851	Promoter (2-3kb)	8	122520568	122520674	107	2	ENSMUSG00000065080	ENSMUST00000083146	-2175	115487007	Gm26497	predicted gene, 26497
8	121578420	121578720	301	*	6.52602	6.90517	6.01026	0.851098	0.000112396	0.00599851	Promoter (<=1kb)	8	121560011	121578747	18737	2	ENSMUSG00000052934	ENSMUST00000212985	27	76454	Fbxo31	F-box protein 31
8	83996648	83996948	301	*	5.42728	5.89827	4.72344	1.12858	0.000112486	0.00599851	Promoter (<=1kb)	8	83997501	84000409	2909	1	ENSMUSG00000079003	ENSMUST00000095228	-553	666704	Samd1	sterile alpha motif domain containing 1
4	15267700	15268000	301	*	3.73822	4.5047	1.99587	2.4305	0.000113578	0.0060429	Intron (ENSMUST00000062684/ENSMUSG00000043252, intron 1 of 2)	4	15265831	15286753	20923	1	ENSMUSG00000043252	ENSMUST00000062684	1869	100201	Tmem64	transmembrane protein 64
19	8850865	8851165	301	*	2.93784	0	3.87389	-4.26692	0.000114455	0.00607202	Promoter (<=1kb)	19	8850785	8853909	3125	1	ENSMUSG00000071656	ENSMUST00000096257	80	68852	Lrrn4cl	LRRN4 C-terminal like
8	57511122	57511422	301	*	5.91223	6.31663	5.34831	0.923672	0.000114645	0.00607202	Promoter (<=1kb)	8	57511907	57515999	4093	1	ENSMUSG00000054717	ENSMUST00000067925	-485	97165	Hmgb2	high mobility group box 2
11	35391756	35392056	301	*	2.54436	3.54436	0	6.53882	0.000115358	0.00609597	Intron (ENSMUST00000069837/ENSMUSG00000056427, intron 4 of 35)	11	35350069	35350785	717	1	ENSMUSG00000086311	ENSMUST00000124503	41687
9	59663230	59663530	301	*	3.58329	4.36704	1.73851	2.54245	0.000115775	0.00610417	Promoter (1-2kb)	9	59664802	59668609	3808	1	ENSMUSG00000032294	ENSMUST00000216857	-1272	18746	Pkm	pyruvate kinase, muscle
12	33345884	33346184	301	*	3.80805	4.52433	2.32229	2.13227	0.000116801	0.00614443	Exon (ENSMUST00000146040/ENSMUSG00000020564, exon 7 of 13)	12	33345305	33368278	22974	1	ENSMUSG00000020564	ENSMUST00000126275	579	380753	Atxn7l1	ataxin 7-like 1
15	102510356	102510656	301	*	5.67904	6.10352	5.07501	0.983317	0.000117301	0.00615683	Promoter (<=1kb)	15	102498776	102510700	11925	2	ENSMUSG00000023050	ENSMUST00000171565	44	26404	Map3k12	mitogen-activated protein kinase kinase kinase 12
12	108555115	108555415	301	*	5.64002	5.10201	6.03099	-0.96896	0.00011818	0.00618906	Promoter (<=1kb)	12	108537243	108555464	18222	2	ENSMUSG00000097788	ENSMUST00000223178	49
12	108003011	108003311	301	*	4.65366	3.87451	5.1568	-1.31743	0.000118565	0.00619533	5' UTR	12	107915222	108003414	88193	2	ENSMUSG00000048251	ENSMUST00000109887	103	58208	Bcl11b	B cell leukemia/lymphoma 11B
8	84908700	84909000	301	*	5.82143	6.22978	5.24975	0.935208	0.000119327	0.00622127	Promoter (<=1kb)	8	84908721	84914521	5801	1	ENSMUSG00000003812	ENSMUST00000128400	0	13423	Dnase2a	deoxyribonuclease II alpha
11	97779118	97779418	301	*	4.10249	4.73789	2.93964	1.73951	0.00012113	0.00630121	Promoter (<=1kb)	11	97778056	97778635	580	2	ENSMUSG00000071415	ENSMUST00000150955	-483	65019	Rpl23	ribosomal protein L23
8	124363170	124363470	301	*	4.07321	4.73626	2.80985	1.86552	0.00012213	0.00633908	Distal Intergenic	8	124357238	124357323	86	1	ENSMUSG00000064664	ENSMUST00000082730	5932	115486995	Gm24459	predicted gene, 24459
4	141279233	141279533	301	*	3.41645	4.25018	1.21692	2.92598	0.000123644	0.00640344	Exon (ENSMUST00000142429/ENSMUSG00000085395, exon 2 of 2)	4	141278439	141279794	1356	1	ENSMUSG00000085395	ENSMUST00000142429	794	100503810	Gm13056	predicted gene 13056
19	41743229	41743529	301	*	4.49437	3.62572	5.03275	-1.44029	0.00012449	0.00643301	Promoter (<=1kb)	19	41600257	41743492	143236	2	ENSMUSG00000025020	ENSMUST00000169141	0	20562	Slit1	slit guidance ligand 1
4	134482458	134482758	301	*	3.14564	4.0618	0	3.86352	0.00012581	0.00648686	Distal Intergenic	4	134493222	134493974	753	1	ENSMUSG00000083001	ENSMUST00000117209	-10464
11	53326953	53327253	301	*	3.70137	4.48099	1.88187	2.51711	0.000127668	0.00656815	Promoter (<=1kb)	11	53327400	53332479	5080	1	ENSMUSG00000018239	ENSMUST00000141585	-147	67966	Zcchc10	zinc finger, CCHC domain containing 10
8	124021470	124021770	301	*	6.38371	6.76471	5.86453	0.856226	0.000128475	0.00658729	Promoter (<=1kb)	8	124021508	124048504	26997	1	ENSMUSG00000031976	ENSMUST00000173168	0	382038	Urb2	URB2 ribosome biogenesis 2 homolog (S. cerevisiae)
1	166152634	166152934	301	*	3.66261	4.41432	2.00155	2.335	0.000128604	0.00658729	5' UTR	1	166130467	166166509	36043	1	ENSMUSG00000000544	ENSMUST00000166860	22167	59290	Gpa33	glycoprotein A33 (transmembrane)
12	111274873	111275173	301	*	4.40584	3.45973	4.97238	-1.54435	0.000130158	0.00665231	Exon (ENSMUST00000021707/ENSMUSG00000021278, exon 7 of 12)	12	111274674	111276252	1579	1	ENSMUSG00000021278	ENSMUST00000220551	199	93835	Amn	amnionless
8	122475922	122476222	301	*	6.68704	7.03792	6.22243	0.771916	0.000131713	0.00671709	Promoter (<=1kb)	8	122466147	122476064	9918	2	ENSMUSG00000014470	ENSMUST00000014614	0	68718	Rnf166	ring finger protein 166
8	89006402	89006702	301	*	5.26109	5.73625	4.54778	1.14172	0.000132247	0.00672963	Distal Intergenic	8	89024735	89024831	97	1	ENSMUSG00000099078	ENSMUST00000183771	-18033	102465899	Mir8110	microRNA 8110
8	105635877	105636177	301	*	6.33512	6.7109	5.82561	0.841306	0.000132892	0.00674296	Promoter (<=1kb)	8	105636568	105681647	45080	1	ENSMUSG00000005698	ENSMUST00000132679	-391	13018	Ctcf	CCCTC-binding factor
8	122571555	122571855	301	*	3.41824	4.25207	1.21793	2.92686	0.000133403	0.00674296	Promoter (<=1kb)	8	122571792	122572535	744	1	ENSMUSG00000006585	ENSMUST00000212821	0	67177	Cdt1	chromatin licensing and DNA replication factor 1
2	112263113	112263413	301	*	4.24547	4.88895	3.05416	1.77718	0.000133517	0.00674296	3' UTR	2	112261926	112263269	1344	1	ENSMUSG00000027133	ENSMUST00000028553	1187	66181	Nop10	NOP10 ribonucleoprotein
5	148509211	148509511	301	*	3.17114	4.06041	0.412396	3.48885	0.000133664	0.00674296	Exon (ENSMUST00000079324/ENSMUSG00000001687, exon 3 of 5)	5	148505978	148537590	31613	2	ENSMUSG00000001687	ENSMUST00000201688	28079	24109	Ubl3	ubiquitin-like 3
3	117359885	117360185	301	*	4.45172	3.5461	5.0038	-1.49023	0.000134055	0.0067481	Promoter (<=1kb)	3	117321911	117360248	38338	2	ENSMUSG00000044667	ENSMUST00000197743	63	229791	Plppr4	phospholipid phosphatase related 4
6	52104089	52104389	301	*	4.59675	5.14455	3.7028	1.39073	0.000135183	0.00677566	Intron (ENSMUST00000125374/ENSMUSG00000085412, intron 1 of 2)	6	52103003	52112188	9186	1	ENSMUSG00000085412	ENSMUST00000155758	1086
14	33955657	33955957	301	*	3.52433	1.73322	4.29921	-2.56366	0.000135221	0.00677566	Exon (ENSMUST00000035695/ENSMUSG00000041534, exon 1 of 4)	14	33954003	33964216	10214	1	ENSMUSG00000041534	ENSMUST00000035695	1654	19661	Rbp3	retinol binding protein 3, interstitial
8	43296076	43296376	301	*	4.47065	5.03068	3.54298	1.43554	0.000135473	0.00677566	Exon (ENSMUST00000211248/ENSMUSG00000051176, exon 5 of 5)	8	43295063	43306936	11874	2	ENSMUSG00000051176	ENSMUST00000211248	10560	22702	Zfp42	zinc finger protein 42
4	83342833	83343133	301	*	4.64535	5.18565	3.77159	1.36355	0.000135962	0.00677738	Distal Intergenic	4	83220300	83324255	103956	2	ENSMUSG00000038172	ENSMUST00000102823	-18578	69863	Ttc39b	tetratricopeptide repeat domain 39B
8	83608414	83608714	301	*	6.87196	7.21211	6.42603	0.742658	0.000136746	0.00677738	Promoter (<=1kb)	8	83608553	83612653	4101	1	ENSMUSG00000005483	ENSMUST00000212300	0	81489	Dnajb1	DnaJ heat shock protein family (Hsp40) member B1
9	21981134	21981434	301	*	3.06211	0.00340951	3.97283	-3.85108	0.000137035	0.00677738	Promoter (3-4kb)	9	21974467	21977421	2955	2	ENSMUSG00000040146	ENSMUST00000213130	-3713	71746	Rgl3	ral guanine nucleotide dissociation stimulator-like 3
17	65867772	65868072	301	*	3.60578	4.37003	1.87609	2.41253	0.000137079	0.00677738	Promoter (<=1kb)	17	65849420	65867830	18411	2	ENSMUSG00000024096	ENSMUST00000233054	0	19765	Ralbp1	ralA binding protein 1
4	134472955	134473255	301	*	4.0464	4.70186	2.81153	1.82962	0.000137164	0.00677738	Exon (ENSMUST00000030636/ENSMUSG00000028832, exon 4 of 5)	4	134469742	134473499	3758	1	ENSMUSG00000028832	ENSMUST00000105868	3213	16765	Stmn1	stathmin 1
17	37010201	37010501	301	*	3.65607	4.42957	1.87313	2.47462	0.000137248	0.00677738	Promoter (4-5kb)	17	37015343	37015590	248	1	ENSMUSG00000088819	ENSMUST00000158194	-4842
8	95806193	95806493	301	*	5.60157	6.03251	4.98428	1.00283	0.000138853	0.00684216	Promoter (<=1kb)	8	95806744	95810700	3957	1	ENSMUSG00000074136	ENSMUST00000212647	-251	319960	4930513N10Rik	RIKEN cDNA 4930513N10 gene
19	6531661	6531961	301	*	4.28655	3.3216	4.85963	-1.56855	0.000139856	0.00687709	Promoter (<=1kb)	19	6530789	6531788	1000	2	ENSMUSG00000052188	ENSMUST00000137184	0
2	170184973	170185273	301	*	4.16991	4.79027	3.05819	1.67492	0.00014106	0.00691001	Distal Intergenic	2	170120719	170148103	27385	2	ENSMUSG00000052056	ENSMUST00000149318	-36870	228913	Zfp217	zinc finger protein 217
3	133517283	133517583	301	*	4.96166	5.44821	4.22207	1.17824	0.000141117	0.00691001	Intron (ENSMUST00000098603/ENSMUSG00000040943, intron 1 of 10)	3	133538762	133544286	5525	2	ENSMUSG00000040943	ENSMUST00000195913	26703	214133	Tet2	tet methylcytosine dioxygenase 2
2	71751563	71751863	301	*	3.4162	4.24928	1.22202	2.92004	0.000141544	0.00691516	Intron (ENSMUST00000133124/ENSMUSG00000027111, intron 2 of 5)	2	71749925	71759801	9877	1	ENSMUSG00000084794	ENSMUST00000157059	1638
4	117151559	117151859	301	*	4.75402	5.27262	3.93656	1.28665	0.000141815	0.00691516	Distal Intergenic	4	117154093	117154162	70	2	ENSMUSG00000064542	ENSMUST00000082608	2303	115490044	Gm22980	predicted gene, 22980
4	47437849	47438149	301	*	2.7408	0	3.70446	-4.88337	0.000142291	0.00692396	Distal Intergenic	4	47453632	47454953	1322	1	ENSMUSG00000081152	ENSMUST00000121539	-15483
19	21714105	21714405	301	*	3.79238	4.54767	2.1121	2.36033	0.000143368	0.00696185	Distal Intergenic	19	21729270	21729745	476	1	ENSMUSG00000118055	ENSMUST00000235761	-14865
8	57487391	57487691	301	*	6.72914	7.08082	6.26311	0.774153	0.0001438	0.00696833	5' UTR	8	57482707	57487860	5154	2	ENSMUSG00000031609	ENSMUST00000034022	169	60406	Sap30	sin3 associated polypeptide
4	133957378	133957678	301	*	4.69086	5.23553	3.80541	1.37974	0.0001441	0.0069684	Distal Intergenic	4	133965444	133967243	1800	2	ENSMUSG00000003038	ENSMUST00000123234	9565	15331	Hmgn2	high mobility group nucleosomal binding domain 2
4	56947744	56948044	301	*	3.41241	4.24432	1.22774	2.90947	0.000144665	0.0069813	Promoter (<=1kb)	4	56866923	56947437	80515	2	ENSMUSG00000055296	ENSMUST00000068792	-307	242474	Tmem245	transmembrane protein 245
12	105009705	105010005	301	*	4.65179	3.8395	5.16834	-1.36364	0.000145733	0.00701833	Promoter (<=1kb)	12	104929933	105009809	79877	2	ENSMUSG00000054150	ENSMUST00000067005	0	212073	Syne3	spectrin repeat containing, nuclear envelope family member 3
18	14706116	14706416	301	*	4.85009	5.35842	4.05823	1.25144	0.000147105	0.00705717	Promoter (<=1kb)	18	14706151	14762298	56148	1	ENSMUSG00000036743	ENSMUST00000040860	0	73677	Psma8	proteasome subunit alpha 8
7	123220116	123220416	301	*	3.6611	4.43644	1.86727	2.48728	0.000147478	0.00705717	Intron (ENSMUST00000131933/ENSMUSG00000030769, intron 1 of 13)	7	123214813	123273253	58441	1	ENSMUSG00000030769	ENSMUST00000033035	5303	233836	Slc5a11	solute carrier family 5 (sodium/glucose cotransporter), member 11
8	70776659	70776959	301	*	6.07714	6.45465	5.56441	0.845987	0.000147543	0.00705717	Promoter (<=1kb)	8	70768176	70776713	8538	2	ENSMUSG00000031834	ENSMUST00000034296	0	18709	Pik3r2	phosphoinositide-3-kinase regulatory subunit 2
8	53511845	53512145	301	*	3.96887	4.64261	2.66414	1.9154	0.000147748	0.00705717	Promoter (<=1kb)	8	53511798	53523421	11624	1	ENSMUSG00000031521	ENSMUST00000209811	47	11593	Aga	aspartylglucosaminidase
8	120549355	120549655	301	*	3.50143	4.32104	1.41266	2.80975	0.000149031	0.00710393	Intron (ENSMUST00000127664/ENSMUSG00000092329, intron 1 of 15)	8	120538696	120538754	59	1	ENSMUSG00000098280	ENSMUST00000184722	10659	102466849	Mir7687	microRNA 7687
11	87756920	87757220	301	*	4.01251	4.67982	2.73282	1.8851	0.000149346	0.00710445	Promoter (<=1kb)	11	87756841	87756955	115	2	ENSMUSG00000065420	ENSMUST00000083486	0	102466883	Mir142b	microRNA 142b
1	135631741	135632041	301	*	3.39231	4.24806	0.998667	3.13017	0.000150674	0.00715303	Intron (ENSMUST00000190298/ENSMUSG00000009418, intron 1 of 30)	1	135434580	135585705	151126	2	ENSMUSG00000009418	ENSMUST00000067414	-46036	215690	Nav1	neuron navigator 1
11	22800379	22800679	301	*	3.08642	3.99927	0	3.80636	0.000152692	0.00723415	Exon (ENSMUST00000189990/ENSMUSG00000051650, exon 2 of 6)	11	22786811	22787247	437	2	ENSMUSG00000082576	ENSMUST00000118614	-13132
11	70979751	70980051	301	*	3.27319	4.14338	0.734421	3.2738	0.000153678	0.00726609	Promoter (<=1kb)	11	70977848	70978871	1024	2	ENSMUSG00000018446	ENSMUST00000155371	-880	12261	C1qbp	complement component 1, q subcomponent binding protein
11	8573430	8573730	301	*	3.93512	4.62028	2.5845	1.97128	0.000154346	0.00728295	Intron (ENSMUST00000239091/ENSMUSG00000020422, intron 4 of 30)	11	8545693	8579121	33429	2	ENSMUSG00000020422	ENSMUST00000134823	5391	319939	Tns3	tensin 3
8	121335168	121335468	301	*	3.47861	4.27046	1.58278	2.59647	0.000155514	0.00732326	Intron (ENSMUST00000127664/ENSMUSG00000092329, intron 1 of 15)	8	121256747	121356836	100090	2	ENSMUSG00000097384	ENSMUST00000181200	21368
14	52022761	52023061	301	*	2.50792	3.50792	0	6.50279	0.000156654	0.00735628	Promoter (<=1kb)	14	52023284	52024108	825	1	ENSMUSG00000115141	ENSMUST00000227187	-223
8	70695503	70695803	301	*	4.08658	4.80646	2.58411	2.15696	0.000156845	0.00735628	Promoter (3-4kb)	8	70698949	70700616	1668	1	ENSMUSG00000071076	ENSMUST00000095267	-3146	16478	Jund	jun D proto-oncogene
17	24350846	24351146	301	*	3.87763	2.58493	4.54831	-1.98337	0.000157412	0.00736807	Promoter (<=1kb)	17	24264259	24351029	86771	2	ENSMUSG00000035435	ENSMUST00000121226	0	381072	Abca17	ATP-binding cassette, sub-family A (ABC1), member 17
5	64392233	64392533	301	*	4.06067	4.72202	2.80375	1.85742	0.000158138	0.00738726	Distal Intergenic	5	64383454	64386205	2752	1	ENSMUSG00000105443	ENSMUST00000200306	8779
8	123318866	123319166	301	*	4.00085	4.66461	2.73478	1.86801	0.000158499	0.00738933	Promoter (<=1kb)	8	123268300	123318576	50277	2	ENSMUSG00000032815	ENSMUST00000035495	-290	14087	Fanca	Fanconi anemia, complementation group A
8	69902566	69902866	301	*	6.46344	6.82147	5.98617	0.791524	0.000159122	0.0074036	Promoter (<=1kb)	8	69887788	69902712	14925	2	ENSMUSG00000048967	ENSMUST00000180068	0	234365	Yjefn3	YjeF N-terminal domain containing 3
5	142969568	142969868	301	*	2.93832	3.8744	0	4.18938	0.000160064	0.00741949	Promoter (<=1kb)	5	142970085	142971989	1905	1	ENSMUSG00000029581	ENSMUST00000135293	-217	14086	Fscn1	fascin actin-bundling protein 1
8	94179257	94179557	301	*	5.4867	5.91465	4.87557	0.993468	0.000160412	0.00741949	Promoter (<=1kb)	8	94179241	94180325	1085	1	ENSMUSG00000031765	ENSMUST00000211807	16	17748	Mt1	metallothionein 1
8	83652665	83652965	301	*	6.34261	6.70034	5.86586	0.790605	0.000160453	0.00741949	Promoter (<=1kb)	8	83652677	83664694	12018	1	ENSMUSG00000019433	ENSMUST00000019577	0	67903	Gipc1	GIPC PDZ domain containing family, member 1
9	99419404	99419704	301	*	4.03098	4.68319	2.80809	1.81445	0.000160734	0.00741949	Intron (ENSMUST00000035045/ENSMUSG00000032470, intron 1 of 5)	9	99393001	99420152	27152	2	ENSMUSG00000032470	ENSMUST00000123771	448	17532	Mras	muscle and microspikes RAS
15	89548203	89548503	301	*	4.78751	3.99882	5.29455	-1.33144	0.000161881	0.00745769	3' UTR	15	89547626	89560261	12636	1	ENSMUSG00000022623	ENSMUST00000039074	577	58234	Shank3	SH3 and multiple ankyrin repeat domains 3
8	122443117	122443417	301	*	6.18483	6.56214	5.67249	0.845517	0.000163067	0.00749276	Promoter (<=1kb)	8	122433601	122443396	9796	2	ENSMUSG00000006517	ENSMUST00000211883	0	192156	Mvd	mevalonate (diphospho) decarboxylase
18	46921742	46922042	301	*	3.54312	4.3208	1.73536	2.49961	0.000163284	0.00749276	Promoter (<=1kb)	18	46921815	46934232	12418	1	ENSMUSG00000073568	ENSMUST00000234910	0	381142	Arl14epl	ADP-ribosylation factor-like 14 effector protein-like
3	55780420	55780720	301	*	3.23042	0.731491	4.09681	-3.31236	0.000163736	0.00749878	Promoter (1-2kb)	3	55782510	55785001	2492	1	ENSMUSG00000056947	ENSMUST00000075422	-1790	17116	Mab21l1	mab-21-like 1
12	118836713	118837013	301	*	4.53409	3.73682	5.0446	-1.34209	0.000164408	0.00750906	Distal Intergenic	12	118846329	118852576	6248	1	ENSMUSG00000048562	ENSMUST00000063918	-9316	320145	Sp8	trans-acting transcription factor 8
8	104442481	104442781	301	*	6.9017	7.23947	6.45987	0.736195	0.000164603	0.00750906	Promoter (<=1kb)	8	104440501	104442744	2244	2	ENSMUSG00000035770	ENSMUST00000212148	0	234663	Dync1li2	dynein, cytoplasmic 1 light intermediate chain 2
15	101277080	101277380	301	*	2.49741	3.49741	0	6.49238	0.000166801	0.00759344	Distal Intergenic	15	101272861	101273847	987	1	ENSMUSG00000023034	ENSMUST00000231153	4219	15370	Nr4a1	nuclear receptor subfamily 4, group A, member 1
5	137634020	137634320	301	*	3.25066	4.11888	0.732704	3.25117	0.000167103	0.00759344	3' UTR	5	137630130	137640180	10051	1	ENSMUSG00000093445	ENSMUST00000175968	3890	231798	Lrch4	leucine-rich repeats and calponin homology (CH) domain containing 4
12	112950234	112950534	301	*	5.32132	4.73679	5.73615	-1.03843	0.000168564	0.00764495	Promoter (<=1kb)	12	112946363	112950512	4150	2	ENSMUSG00000097476	ENSMUST00000181436	0
1	93206257	93206557	301	*	3.32422	4.1722	1.00244	3.05112	0.000169638	0.00767877	Intron (ENSMUST00000138595/ENSMUSG00000084989, intron 20 of 31)	1	93235841	93301065	65225	1	ENSMUSG00000047793	ENSMUST00000062202	-29284	208777	Sned1	sushi, nidogen and EGF-like domains 1
17	45696785	45697085	301	*	3.82704	4.52631	2.4171	2.04162	0.000172194	0.00777938	Exon (ENSMUST00000149040/ENSMUSG00000023939, exon 3 of 4)	17	45695416	45698400	2985	1	ENSMUSG00000023939	ENSMUST00000148537	1369	68463	Mrpl14	mitochondrial ribosomal protein L14
3	146117489	146117789	301	*	2.45477	0	3.45477	-6.49232	0.0001734	0.00781872	Promoter (<=1kb)	3	146117450	146124806	7357	1	ENSMUSG00000036853	ENSMUST00000140214	39	171166	Mcoln3	mucolipin 3
8	72443411	72443711	301	*	5.59475	6.00734	5.01468	0.947422	0.000174181	0.00783882	5' UTR	8	72424176	72443870	19695	2	ENSMUSG00000019732	ENSMUST00000019876	159	73316	Calr3	calreticulin 3
13	73344103	73344403	301	*	3.41632	4.24967	1.21992	2.92251	0.000175386	0.00784254	Distal Intergenic	13	73344665	73347384	2720	2	ENSMUSG00000113346	ENSMUST00000223470	2981	432777	Eprn	ephemeron, early developmental lncRNA
17	56992484	56992784	301	*	3.72399	4.46537	2.11678	2.27385	0.000175438	0.00784254	Intron (ENSMUST00000002735/ENSMUSG00000002660, intron 3 of 5)	17	56990392	56990825	434	1	ENSMUSG00000002660	ENSMUST00000233845	2092	53895	Clpp	caseinolytic mitochondrial matrix peptidase proteolytic subunit
8	119558390	119558690	301	*	6.33198	6.71582	5.80747	0.864322	0.000175539	0.00784254	Promoter (<=1kb)	8	119547089	119558441	11353	2	ENSMUSG00000031835	ENSMUST00000212813	0	56453	Mbtps1	membrane-bound transcription factor peptidase, site 1
17	33819736	33820036	301	*	3.92335	4.60439	2.58947	1.95054	0.000175607	0.00784254	Promoter (<=1kb)	17	33819649	33821955	2307	1	ENSMUSG00000042099	ENSMUST00000234152	87	80880	Kank3	KN motif and ankyrin repeat domains 3
9	108653084	108653384	301	*	3.75406	4.4801	2.22249	2.18562	0.000176768	0.00787934	Distal Intergenic	9	108653608	108653728	121	2	ENSMUSG00000095798	ENSMUST00000116956	344
8	88118750	88119050	301	*	6.20169	6.57777	5.69163	0.842026	0.000177857	0.00791278	Promoter (<=1kb)	8	88118769	88135106	16338	1	ENSMUSG00000036810	ENSMUST00000095214	0	382030	Cnep1r1	CTD nuclear envelope phosphatase 1 regulatory subunit 1
12	105032703	105033003	301	*	5.64055	5.11591	6.02445	-0.948597	0.000178811	0.0079401	Promoter (<=1kb)	12	105032690	105042906	10217	1	ENSMUSG00000021102	ENSMUST00000021522	13	73046	Glrx5	glutaredoxin 5
4	154655084	154655384	301	*	4.48905	5.05534	3.54367	1.45941	0.000179998	0.00797764	Promoter (<=1kb)	4	154645754	154655318	9565	2	ENSMUSG00000086810	ENSMUST00000138077	0
X	93297010	93297310	301	*	3.54539	1.87707	4.29846	-2.42395	0.000180814	0.00799863	Exon (ENSMUST00000046565/ENSMUSG00000035277, exon 5 of 5)	20	93286510	93298062	11553	1	ENSMUSG00000035277	ENSMUST00000113947	10500	11878	Arx	aristaless related homeobox
8	106150477	106150777	301	*	6.2399	6.61159	5.7379	0.829642	0.000181254	0.00800292	Promoter (<=1kb)	8	106150506	106160534	10029	1	ENSMUSG00000031903	ENSMUST00000212116	0	192654	Pla2g15	phospholipase A2, group XV
12	51844829	51845129	301	*	4.44837	5.01392	3.50509	1.45631	0.000182458	0.00804089	Promoter (4-5kb)	12	51840417	51840621	205	2	ENSMUSG00000112746	ENSMUST00000218295	-4208
8	84912977	84913277	301	*	5.79958	6.21859	5.20665	0.967013	0.000184333	0.00810824	Promoter (<=1kb)	8	84913391	84922915	9525	1	ENSMUSG00000003812	ENSMUST00000148573	-114	13423	Dnase2a	deoxyribonuclease II alpha
18	56975081	56975381	301	*	4.54481	3.73844	5.05899	-1.3548	0.000188151	0.0082606	Promoter (<=1kb)	18	56955833	56975368	19536	2	ENSMUSG00000024592	ENSMUST00000025488	0	77422	C330018D20Rik	RIKEN cDNA C330018D20 gene
1	186967730	186968030	301	*	4.94608	5.4697	4.11587	1.30515	0.000189177	0.00827408	Promoter (<=1kb)	1	186964528	186967603	3076	2	ENSMUSG00000104312	ENSMUST00000191895	-127
5	73947195	73947495	301	*	5.0508	5.52301	4.3442	1.13148	0.000189402	0.00827408	Intron (ENSMUST00000202711/ENSMUSG00000106968, intron 1 of 1)	5	73946381	73948376	1996	1	ENSMUSG00000106968	ENSMUST00000202711	814
12	86801475	86801775	301	*	3.95602	4.62553	2.66781	1.89477	0.000189521	0.00827408	Distal Intergenic	12	86809957	86810258	302	1	ENSMUSG00000088403	ENSMUST00000157778	-8182
17	56474365	56474665	301	*	4.15365	3.11279	4.75197	-1.66737	0.000190882	0.00831798	Promoter (<=1kb)	17	56454966	56474627	19662	2	ENSMUSG00000013236	ENSMUST00000223742	0	19280	Ptprs	protein tyrosine phosphatase, receptor type, S
12	110738092	110738392	301	*	5.62816	5.10127	6.01326	-0.952007	0.000191792	0.00834205	Promoter (<=1kb)	12	110738209	110793316	55108	1	ENSMUSG00000037957	ENSMUST00000195886	0	69641	Wdr20	WD repeat domain 20
1	86308970	86309270	301	*	4.11405	4.73583	2.99761	1.68043	0.000193226	0.0083587	Promoter (4-5kb)	1	86303195	86304059	865	2	ENSMUSG00000099644	ENSMUST00000187004	-4911
10	44441359	44441659	301	*	4.70935	5.23504	3.8738	1.31144	0.000193403	0.0083587	Exon (ENSMUST00000039174/ENSMUSG00000038151, exon 6 of 8)	10	44439667	44457210	17544	2	ENSMUSG00000038151	ENSMUST00000218369	15551	12142	Prdm1	PR domain containing 1, with ZNF domain
8	83593941	83594241	301	*	6.27965	6.6434	5.79209	0.807342	0.000193462	0.0083587	Intron (ENSMUST00000163837/ENSMUSG00000031708, intron 1 of 12)	8	83572663	83594421	21759	2	ENSMUSG00000031708	ENSMUST00000212575	180	106529	Tecr	trans-2,3-enoyl-CoA reductase
16	35645810	35646110	301	*	3.05736	3.96806	0	3.77059	0.000193924	0.0083587	Exon (ENSMUST00000133554/ENSMUSG00000052133, exon 5 of 6)	16	35658095	35658487	393	1	ENSMUSG00000052133	ENSMUST00000139805	-11985	20357	Sema5b	sema domain, seven thrombospondin repeats (type 1 and type 1-like), transmembrane domain (TM) and short cytoplasmic domain, (semaphorin) 5B
8	117158074	117158374	301	*	6.30751	6.66334	5.83414	0.785307	0.000193965	0.0083587	Promoter (<=1kb)	8	117158135	117205186	47052	1	ENSMUSG00000052557	ENSMUST00000064488	0	209239	Gan	giant axonal neuropathy
8	80971923	80972223	301	*	3.85572	4.54155	2.50232	1.97346	0.000194354	0.0083587	Distal Intergenic	8	80933534	80938667	5134	2	ENSMUSG00000098001	ENSMUST00000182891	-33256
8	69996617	69996917	301	*	6.02701	6.40506	5.51331	0.847425	0.00019468	0.0083587	Promoter (<=1kb)	8	69908657	69996384	87728	2	ENSMUSG00000036180	ENSMUST00000212478	-233	234366	Gatad2a	GATA zinc finger domain containing 2A
8	110970706	110971006	301	*	5.64034	6.06647	5.03293	0.988248	0.000195272	0.00836875	3' UTR	8	110978542	110980634	2093	2	ENSMUSG00000015023	ENSMUST00000130133	9628	13680	Ddx19a	DEAD box helicase 19a
18	77563373	77563673	301	*	4.21023	4.8252	3.11628	1.65241	0.000197938	0.00846747	Exon (ENSMUST00000182294/ENSMUSG00000025427, exon 1 of 1)	18	77562093	77564609	2517	2	ENSMUSG00000025427	ENSMUST00000182294	936	225743	Rnf165	ring finger protein 165
8	71367186	71367486	301	*	6.21624	6.58606	5.71767	0.824335	0.000198638	0.00848187	Promoter (<=1kb)	8	71367217	71369732	2516	1	ENSMUSG00000002395	ENSMUST00000019169	0	67023	Use1	unconventional SNARE in the ER 1 homolog (S. cerevisiae)
7	142580392	142580692	301	*	3.56705	4.32454	1.87485	2.36855	0.000200177	0.008532	Promoter (2-3kb)	7	142575529	142578143	2615	2	ENSMUSG00000000031	ENSMUST00000136359	-2249	14955	H19	H19, imprinted maternally expressed transcript
13	44811460	44811760	301	*	2.73603	3.6995	0	4.80279	0.000201198	0.00855991	Intron (ENSMUST00000174068/ENSMUSG00000038518, intron 2 of 3)	13	44838165	44838283	119	2	ENSMUSG00000088189	ENSMUST00000157564	26523
3	130180933	130181233	301	*	4.69112	3.91001	5.19506	-1.32034	0.000202432	0.00859673	Promoter (<=1kb)	3	130180891	130599877	418987	1	ENSMUSG00000058897	ENSMUST00000106353	42	77018	Col25a1	collagen, type XXV, alpha 1
8	120521498	120521798	301	*	4.04511	4.68268	2.8747	1.74847	0.000203506	0.00862667	Exon (ENSMUST00000182423/ENSMUSG00000097983, exon 1 of 1)	8	120520615	120521686	1072	1	ENSMUSG00000097983	ENSMUST00000182423	883
16	23100452	23100752	301	*	4.63343	5.15595	3.80603	1.29981	0.000204256	0.00863324	Distal Intergenic	16	23107444	23113947	6504	1	ENSMUSG00000022884	ENSMUST00000023599	-6692	13682	Eif4a2	eukaryotic translation initiation factor 4A2
2	168758265	168758565	301	*	4.04338	4.68076	2.87362	1.74763	0.000204523	0.00863324	Promoter (2-3kb)	2	168754915	168755943	1029	2	ENSMUSG00000027547	ENSMUST00000150588	-2322	99377	Sall4	spalt like transcription factor 4
17	24640544	24640844	301	*	4.82711	5.33655	4.03249	1.25517	0.00020477	0.00863324	Exon (ENSMUST00000019684/ENSMUSG00000002504, exon 5 of 6)	17	24638176	24638836	661	1	ENSMUSG00000041429	ENSMUST00000234888	2368	18207	Nthl1	nth (endonuclease III)-like 1 (E.coli)
5	135656925	135657225	301	*	3.70078	4.46097	1.99375	2.38912	0.000206885	0.00869194	Intron (ENSMUST00000198157/ENSMUSG00000105239, intron 2 of 3)	5	135643955	135644336	382	2	ENSMUSG00000094372	ENSMUST00000179536	-12589
12	110601613	110601913	301	*	6.09493	5.65399	6.43218	-0.819205	0.000206994	0.00869194	Promoter (<=1kb)	12	110599745	110601963	2219	2	ENSMUSG00000113662	ENSMUST00000222675	50
9	110476581	110476881	301	*	6.03679	6.40844	5.53489	0.829287	0.000207279	0.00869194	Promoter (<=1kb)	9	110425926	110476694	50769	2	ENSMUSG00000054792	ENSMUST00000068025	0	270201	Klhl18	kelch-like 18
3	95653714	95654014	301	*	3.66254	4.39202	2.1144	2.20328	0.000208592	0.00873133	Promoter (4-5kb)	3	95658788	95663176	4389	1	ENSMUSG00000038612	ENSMUST00000037947	-4774	17210	Mcl1	myeloid cell leukemia sequence 1
4	140402223	140402523	301	*	3.43929	4.27612	1.21411	2.95453	0.000210088	0.00877821	Distal Intergenic	4	140391148	140396604	5457	1	ENSMUSG00000086960	ENSMUST00000156409	11075
8	119916209	119916509	301	*	3.3916	4.22068	1.2296	2.88416	0.00021185	0.00883604	Intron (ENSMUST00000144458/ENSMUSG00000031826, intron 1 of 13)	8	119910857	119951934	41078	1	ENSMUSG00000031826	ENSMUST00000108982	5352	22224	Usp10	ubiquitin specific peptidase 10
15	99652532	99652832	301	*	2.45501	3.45501	0	6.45045	0.000213041	0.00886333	Promoter (<=1kb)	15	99620497	99651656	31160	2	ENSMUSG00000023015	ENSMUST00000023756	-876	26934	Racgap1	Rac GTPase-activating protein 1
10	81144289	81144589	301	*	4.42468	4.98256	3.50302	1.42713	0.000213263	0.00886333	Exon (ENSMUST00000125261/ENSMUSG00000035011, exon 2 of 2)	10	81137953	81148458	10506	1	ENSMUSG00000035011	ENSMUST00000117956	6336	16969	Zbtb7a	zinc finger and BTB domain containing 7a
17	36970707	36971007	301	*	4.27536	4.89208	3.17569	1.66037	0.000213659	0.00886401	Exon (ENSMUST00000119193/ENSMUSG00000083534, exon 2 of 5)	17	36969195	36971396	2202	2	ENSMUSG00000083534	ENSMUST00000119193	389	14994	H2-M6-ps	histocompatibility 2, M region locus 6, pseudogene
17	47820532	47820832	301	*	3.47472	4.29135	1.40805	2.7848	0.00021462	0.00888486	Exon (ENSMUST00000113280/ENSMUSG00000032717, exon 3 of 4)	17	47816039	47833169	17131	2	ENSMUSG00000032717	ENSMUST00000131971	12337	17240	Mdfi	MyoD family inhibitor
2	162934505	162934805	301	*	3.08825	3.97064	0.41327	3.39891	0.000214922	0.00888486	3' UTR	2	162931661	162933509	1849	1	ENSMUSG00000016921	ENSMUST00000126163	2844	67996	Srsf6	serine and arginine-rich splicing factor 6
5	117360039	117360339	301	*	3.37064	4.19767	1.22483	2.86602	0.00021633	0.00892723	Promoter (<=1kb)	5	117361022	117370922	9901	1	ENSMUSG00000029364	ENSMUST00000138071	-683	59043	Wsb2	WD repeat and SOCS box-containing 2
15	77057521	77057821	301	*	3.62499	4.37043	1.99689	2.296	0.000216944	0.00893487	Distal Intergenic	15	77052751	77056044	3294	1	ENSMUSG00000033576	ENSMUST00000139304	4770	71939	Apol6	apolipoprotein L 6
2	165987138	165987438	301	*	4.46019	5.01542	3.54588	1.41746	0.00021728	0.00893487	Promoter (1-2kb)	2	165976757	165985924	9168	2	ENSMUSG00000084816	ENSMUST00000130022	-1214
8	85473171	85473471	301	*	2.87743	3.8106	0	4.12434	0.000217779	0.00893964	Distal Intergenic	8	85492576	85527560	34985	1	ENSMUSG00000031700	ENSMUST00000034136	-19105	108682	Gpt2	glutamic pyruvate transaminase (alanine aminotransferase) 2
13	97295633	97295933	301	*	4.14077	4.7709	2.99608	1.71686	0.000218544	0.00895437	Distal Intergenic	13	97283183	97285560	2378	1	ENSMUSG00000097932	ENSMUST00000181148	12450
6	120086993	120087293	301	*	2.46696	3.46696	0	6.4623	0.000218904	0.00895437	Distal Intergenic	6	120093350	120200339	106990	1	ENSMUSG00000041377	ENSMUST00000112711	-6057	29862	Ninj2	ninjurin 2
18	38595416	38595716	301	*	3.11384	3.9979	0.418922	3.42041	0.000221528	0.00904586	Intron (ENSMUST00000025295/ENSMUSG00000024427, intron 1 of 1)	18	38594365	38594483	119	1	ENSMUSG00000099157	ENSMUST00000185135	1051
8	83998457	83998757	301	*	6.25526	6.62138	5.76342	0.813954	0.000223466	0.00909703	Promoter (<=1kb)	8	83998424	83998864	441	1	ENSMUSG00000079003	ENSMUST00000209606	33	666704	Samd1	sterile alpha motif domain containing 1
8	12486474	12486774	301	*	2.91192	3.84661	0	4.15793	0.00022356	0.00909703	Distal Intergenic	8	12502899	12505341	2443	1	ENSMUSG00000109582	ENSMUST00000211062	-16125
2	167633917	167634217	301	*	3.56217	4.34378	1.73058	2.52718	0.000224369	0.00911406	Promoter (1-2kb)	2	167607638	167632095	24458	2	ENSMUSG00000078923	ENSMUST00000109207	-1822	66589	Ube2v1	ubiquitin-conjugating enzyme E2 variant 1
3	121429538	121429838	301	*	2.7329	3.69629	0	4.79961	0.000225207	0.00912424	Intron (ENSMUST00000029773/ENSMUSG00000053931, intron 1 of 6)	3	121428046	121429331	1286	1	ENSMUSG00000106022	ENSMUST00000198374	1492
9	114530705	114531005	301	*	4.1037	4.72146	3.00058	1.66318	0.000225401	0.00912424	Intron (ENSMUST00000111816/ENSMUSG00000079259, intron 1 of 3)	9	114515697	114516601	905	1	ENSMUSG00000097821	ENSMUST00000238379	15008
8	72240052	72240352	301	*	6.50194	6.85403	6.03519	0.775123	0.000227821	0.00919449	Promoter (<=1kb)	8	72240095	72249879	9785	1	ENSMUSG00000003033	ENSMUST00000212708	0	11767	Ap1m1	adaptor-related protein complex AP-1, mu subunit 1
10	62889375	62889675	301	*	3.79107	4.50492	2.31642	2.1188	0.000228014	0.00919449	Promoter (1-2kb)	10	62879873	62887512	7640	2	ENSMUSG00000047146	ENSMUST00000228901	-1863	52463	Tet1	tet methylcytosine dioxygenase 1
16	44487554	44487854	301	*	2.73364	3.69693	0	4.79595	0.000228619	0.00919449	Exon (ENSMUST00000114634/ENSMUSG00000022687, exon 16 of 19)	16	44470444	44482428	11985	1	ENSMUSG00000071550	ENSMUST00000127303	17110	212517	Cfap44	cilia and flagella associated protein 44
9	78484418	78484718	301	*	2.46824	3.46824	0	6.46356	0.000228941	0.00919449	Promoter (2-3kb)	9	78478449	78481724	3276	2	ENSMUSG00000037742	ENSMUST00000042235	-2694	13627	Eef1a1	eukaryotic translation elongation factor 1 alpha 1
16	38445784	38446084	301	*	4.70046	5.22307	3.87283	1.30047	0.000229104	0.00919449	Exon (ENSMUST00000002923/ENSMUSG00000002844, exon 4 of 4)	16	38451982	38453494	1513	1	ENSMUSG00000097576	ENSMUST00000180735	-5898
16	38459252	38459552	301	*	3.22084	4.08567	0.737819	3.21316	0.000229661	0.00920103	Exon (ENSMUST00000231716/ENSMUSG00000075122, exon 2 of 7)	16	38459118	38486447	27330	1	ENSMUSG00000075122	ENSMUST00000232409	134	12519	Cd80	CD80 antigen
15	11036708	11037008	301	*	3.48856	1.73615	4.2568	-2.51863	0.000231653	0.00926493	Exon (ENSMUST00000058007/ENSMUSG00000060735, exon 1 of 1)	15	11033717	11037991	4275	2	ENSMUSG00000060735	ENSMUST00000058007	983	239336	Rxfp3	relaxin family peptide receptor 3
2	168970455	168970755	301	*	4.0016	4.6462	2.8063	1.77943	0.000236024	0.00942359	Distal Intergenic	2	168978268	168978906	639	1	ENSMUSG00000086348	ENSMUST00000140241	-7513	75508	1700017J07Rik	RIKEN cDNA 1700017J07 gene
8	107140812	107141112	301	*	3.48416	4.27649	1.58515	2.60013	0.000237436	0.00944514	Distal Intergenic	8	107150640	107187471	36832	1	ENSMUSG00000031924	ENSMUST00000034400	-9528	66427	Cyb5b	cytochrome b5 type B
13	55338090	55338390	301	*	2.99671	3.90369	0	3.71029	0.000237637	0.00944514	Distal Intergenic	13	55325487	55329823	4337	2	ENSMUSG00000021485	ENSMUST00000225561	-8267	17121	Mxd3	Max dimerization protein 3
7	5061221	5061521	301	*	5.53989	5.95443	4.9559	0.953166	0.000237776	0.00944514	Exon (ENSMUST00000207548/ENSMUSG00000109274, exon 1 of 1)	7	5059277	5062049	2773	2	ENSMUSG00000109274	ENSMUST00000207548	528
5	149287327	149287627	301	*	4.30915	3.41406	4.85737	-1.47496	0.000243373	0.00965104	Promoter (<=1kb)	5	149287415	149288044	630	1	ENSMUSG00000060063	ENSMUST00000202629	0	11690	Alox5ap	arachidonate 5-lipoxygenase activating protein
17	35490295	35490595	301	*	3.83639	4.53908	2.41156	2.0598	0.000243935	0.00965691	Distal Intergenic	17	35506018	35510772	4755	1	ENSMUSG00000024406	ENSMUST00000025271	-15423	18999	Pou5f1	POU domain, class 5, transcription factor 1
19	8990499	8990799	301	*	4.27402	4.85854	3.27533	1.52866	0.000245334	0.00969588	Intron (ENSMUST00000092956/ENSMUSG00000069833, intron 1 of 4)	19	8989295	9076714	87420	1	ENSMUSG00000069833	ENSMUST00000092955	1204	66395	Ahnak	AHNAK nucleoprotein (desmoyokin)
8	41041380	41041680	301	*	3.91035	4.60802	2.50725	2.03468	0.000246684	0.00973278	5' UTR	8	40991052	41041866	50815	2	ENSMUSG00000045636	ENSMUST00000051379	186	102103	Mtus1	mitochondrial tumor suppressor 1
1	86307606	86307906	301	*	4.31099	4.90779	3.27486	1.57818	0.000248553	0.00978521	Promoter (3-4kb)	1	86303195	86304059	865	2	ENSMUSG00000099644	ENSMUST00000187004	-3547
3	17786392	17786692	301	*	4.39229	3.54489	4.92258	-1.41053	0.000248851	0.00978521	Promoter (3-4kb)	3	17789921	17800073	10153	1	ENSMUSG00000100252	ENSMUST00000188983	-3229	70441	Mir124-2hg	Mir124-2 host gene (non-protein coding)
6	52217283	52217583	301	*	4.56558	3.80831	5.05963	-1.28622	0.000249607	0.00979845	Promoter (<=1kb)	6	52214498	52217505	3008	2	ENSMUSG00000038236	ENSMUST00000048715	0	15404	Hoxa7	homeobox A7
8	75093636	75093936	301	*	6.23868	6.59025	5.77284	0.773472	0.00025013	0.00980249	Promoter (<=1kb)	8	75093621	75100589	6969	1	ENSMUSG00000005413	ENSMUST00000005548	15	15368	Hmox1	heme oxygenase 1
13	55336970	55337270	301	*	2.45311	3.45311	0	6.44857	0.000252511	0.00985566	Distal Intergenic	13	55325487	55329823	4337	2	ENSMUSG00000021485	ENSMUST00000225561	-7147	17121	Mxd3	Max dimerization protein 3
8	84066113	84066413	301	*	6.04516	6.42794	5.52265	0.860962	0.000253007	0.00985566	Promoter (<=1kb)	8	84066834	84096459	29626	1	ENSMUSG00000031706	ENSMUST00000211046	-421	19724	Rfx1	regulatory factor X, 1 (influences HLA class II expression)
11	116674622	116674922	301	*	3.96884	4.62294	2.73903	1.82232	0.000253148	0.00985566	Promoter (<=1kb)	11	116674598	116674671	74	1	ENSMUSG00000065094	ENSMUST00000083160	24	100216538	Snord1a	small nucleolar RNA, C/D box 1A
8	116943598	116943898	301	*	6.78447	7.12441	6.33889	0.742049	0.000253174	0.00985566	Exon (ENSMUST00000109099/ENSMUSG00000047388, exon 1 of 4)	8	116943393	116960445	17053	1	ENSMUSG00000047388	ENSMUST00000109099	205	234776	Atmin	ATM interactor
8	79295077	79295377	301	*	5.96006	6.35921	5.40637	0.908285	0.000253619	0.00985654	Promoter (<=1kb)	8	79295123	79308961	13839	1	ENSMUSG00000097174	ENSMUST00000181030	0
9	120932914	120933214	301	*	3.7568	2.4114	4.44069	-2.0461	0.000255896	0.0099285	Promoter (<=1kb)	9	120933400	120960507	27108	1	ENSMUSG00000006932	ENSMUST00000007130	-186	12387	Ctnnb1	catenin (cadherin associated protein), beta 1
15	103245142	103245442	301	*	3.14191	4.02871	0.413805	3.456	0.000256858	0.00994931	3' UTR	15	103240494	103244955	4462	1	ENSMUSG00000046434	ENSMUST00000231141	4648	15382	Hnrnpa1	heterogeneous nuclear ribonucleoprotein A1
7	29964874	29965174	301	*	2.42009	3.42009	0	6.41596	0.000258978	0.0100148	Exon (ENSMUST00000239012/ENSMUSG00000063623, exon 5 of 5)	7	29965218	29965565	348	2	ENSMUSG00000083669	ENSMUST00000121822	391
12	113014493	113014793	301	*	5.36857	4.72174	5.81357	-1.13064	0.000259737	0.0100276	Promoter (<=1kb)	12	113014508	113072138	57631	1	ENSMUSG00000021143	ENSMUST00000223502	0	217893	Pacs2	phosphofurin acidic cluster sorting protein 2
2	71747285	71747585	301	*	4.47229	5.06158	3.45924	1.54915	0.000260553	0.0100425	Promoter (<=1kb)	2	71747507	71750200	2694	1	ENSMUSG00000086641	ENSMUST00000145563	0
10	34232577	34232877	301	*	3.84127	4.56556	2.31807	2.17747	0.000261295	0.0100545	Intron (ENSMUST00000216701/ENSMUSG00000111149, intron 1 of 2)	10	34230907	34233531	2625	2	ENSMUSG00000111149	ENSMUST00000216701	654
8	84025997	84026297	301	*	5.4917	5.92373	4.87214	1.00596	0.00026445	0.0101592	Promoter (<=1kb)	8	84026075	84027049	975	1	ENSMUSG00000047986	ENSMUST00000154171	0	74337	Palm3	paralemmin 3
8	111940824	111941124	301	*	7.01481	7.33682	6.59964	0.693889	0.000271936	0.0104296	Promoter (<=1kb)	8	111941068	111952742	11675	1	ENSMUSG00000031950	ENSMUST00000133628	0	93739	Gabarapl2	gamma-aminobutyric acid (GABA) A receptor-associated protein-like 2
19	8839758	8840058	301	*	2.87467	3.80761	0	4.11929	0.000275033	0.0105206	5' UTR	19	8839390	8848638	9249	1	ENSMUSG00000071657	ENSMUST00000160897	368	14705	Bscl2	Berardinelli-Seip congenital lipodystrophy 2 (seipin)
8	112011539	112011839	301	*	6.78498	7.12063	6.34677	0.730403	0.000275209	0.0105206	Exon (ENSMUST00000052138/ENSMUSG00000033430, exon 1 of 3)	8	112011402	112013540	2139	1	ENSMUSG00000033430	ENSMUST00000212732	137	57321	Terf2ip	telomeric repeat binding factor 2, interacting protein
11	32614394	32614694	301	*	5.27303	5.71767	4.62698	1.04439	0.000275764	0.0105245	Exon (ENSMUST00000102821/ENSMUSG00000020272, exon 16 of 19)	11	32588595	32598528	9934	1	ENSMUSG00000020272	ENSMUST00000143397	25799	20868	Stk10	serine/threonine kinase 10
8	90877184	90877484	301	*	3.98479	4.62466	2.80629	1.75801	0.000281003	0.010707	Exon (ENSMUST00000210665/ENSMUSG00000109812, exon 1 of 1)	8	90876581	90878476	1896	1	ENSMUSG00000109812	ENSMUST00000210665	603
11	95980364	95980664	301	*	4.62332	5.14167	3.80649	1.28513	0.000282415	0.0107433	Intron (ENSMUST00000013559/ENSMUSG00000013415, intron 2 of 14)	11	95973144	95982594	9451	2	ENSMUSG00000013415	ENSMUST00000152896	1930	140486	Igf2bp1	insulin-like growth factor 2 mRNA binding protein 1
15	89169302	89169602	301	*	3.54729	4.32521	1.73809	2.5013	0.000284169	0.0107839	Intron (ENSMUST00000060808/ENSMUSG00000036606, intron 1 of 35)	15	89155549	89170688	15140	2	ENSMUSG00000036606	ENSMUST00000060808	1086	140570	Plxnb2	plexin B2
8	87938525	87938825	301	*	4.63498	5.1438	3.8419	1.25213	0.000284407	0.0107839	Intron (ENSMUST00000109655/ENSMUSG00000045333, intron 1 of 7)	8	87783316	87944052	160737	2	ENSMUSG00000045333	ENSMUST00000173725	5227	94187	Zfp423	zinc finger protein 423
11	70980366	70980666	301	*	3.43616	4.22102	1.58451	2.54564	0.000287027	0.0108656	Promoter (1-2kb)	11	70977848	70978871	1024	2	ENSMUSG00000018446	ENSMUST00000155371	-1495	12261	C1qbp	complement component 1, q subcomponent binding protein
8	87982800	87983100	301	*	3.43652	4.22094	1.58763	2.54248	0.000287816	0.0108779	Distal Intergenic	8	87661810	87959595	297786	2	ENSMUSG00000045333	ENSMUST00000109655	-23205	94187	Zfp423	zinc finger protein 423
2	152687326	152687626	301	*	4.64472	5.17121	3.80714	1.31392	0.000288677	0.0108849	Exon (ENSMUST00000062148/ENSMUSG00000042814, exon 1 of 1)	2	152687035	152687946	912	1	ENSMUSG00000042814	ENSMUST00000062148	291	66405	Mcts2	malignant T cell amplified sequence 2
8	43294569	43294869	301	*	3.44261	4.25273	1.42308	2.7316	0.000288935	0.0108849	Distal Intergenic	8	43295063	43306936	11874	2	ENSMUSG00000051176	ENSMUST00000211248	12067	22702	Zfp42	zinc finger protein 42
6	72655378	72655678	301	*	2.87313	3.80565	0	4.11029	0.000290857	0.0109397	Intron (ENSMUST00000069536/ENSMUSG00000055799, intron 3 of 11)	6	72652320	72653600	1281	1	ENSMUSG00000102983	ENSMUST00000192767	3058
12	110278682	110278982	301	*	5.02289	4.32251	5.49235	-1.20726	0.000294084	0.0110433	Promoter (<=1kb)	12	110279068	110281097	2030	1	ENSMUSG00000075707	ENSMUST00000173014	-86	107585	Dio3	deiodinase, iodothyronine type III
4	129884130	129884430	301	*	3.85657	4.52244	2.58247	1.87599	0.000296263	0.0111073	Distal Intergenic	4	129895573	129895724	152	1	ENSMUSG00000065768	ENSMUST00000083834	-11143	115489377	Gm23845	predicted gene, 23845
7	27232930	27233230	301	*	3.85636	4.54341	2.49796	1.97963	0.000296865	0.011112	Promoter (<=1kb)	7	27233023	27257950	24928	1	ENSMUSG00000003762	ENSMUST00000003860	0	76889	Coq8b	coenzyme Q8B
3	96559904	96560204	301	*	5.31025	5.74642	4.68209	1.01823	0.000299826	0.0112049	Promoter (<=1kb)	3	96560054	96560565	512	1	ENSMUSG00000038393	ENSMUST00000128221	0	56338	Txnip	thioredoxin interacting protein
12	112941896	112942196	301	*	3.92545	2.74096	4.56702	-1.84896	0.000300354	0.0112067	Promoter (<=1kb)	12	112934291	112942124	7834	2	ENSMUSG00000002804	ENSMUST00000221397	0	66174	Nudt14	nudix (nucleoside diphosphate linked moiety X)-type motif 14
9	108308260	108308560	301	*	3.75742	4.46317	2.31916	2.07457	0.000301948	0.0112482	Exon (ENSMUST00000193619/ENSMUSG00000007815, exon 1 of 1)	9	108306829	108330916	24088	1	ENSMUSG00000007815	ENSMUST00000193490	1431	11848	Rhoa	ras homolog family member A
4	148752507	148752807	301	*	3.87202	4.58099	2.41943	2.09369	0.000302507	0.011251	Distal Intergenic	4	148713703	148716581	2879	1	ENSMUSG00000087273	ENSMUST00000139895	38804	115489366	Gm13203	predicted gene 13203
13	9277037	9277337	301	*	5.17771	5.65277	4.46465	1.14111	0.000303106	0.0112554	Promoter (<=1kb)	13	9276982	9666178	389197	1	ENSMUSG00000048264	ENSMUST00000166299	55	208440	Dip2c	disco interacting protein 2 homolog C
5	149353138	149353438	301	*	3.14472	0.731064	4.00256	-3.2192	0.000304925	0.011305	Distal Intergenic	5	149367636	149393596	25961	1	ENSMUSG00000107271	ENSMUST00000202022	-14198
12	54068104	54068404	301	*	4.66418	3.91005	5.1569	-1.28228	0.000309226	0.0114463	Exon (ENSMUST00000223358/ENSMUSG00000021010, exon 11 of 11)	12	54062048	54079392	17345	2	ENSMUSG00000099407	ENSMUST00000185390	10988
12	110485795	110486095	301	*	4.80653	4.14298	5.25931	-1.15323	0.000311067	0.0114962	Promoter (<=1kb)	12	110485859	110580804	94946	1	ENSMUSG00000017843	ENSMUST00000084985	0	26931	Ppp2r5c	protein phosphatase 2, regulatory subunit B', gamma
5	121582235	121582535	301	*	2.99858	3.90545	0	3.70855	0.000320368	0.0118212	Promoter (2-3kb)	5	121567879	121579666	11788	2	ENSMUSG00000029455	ENSMUST00000199369	-2569	11669	Aldh2	aldehyde dehydrogenase 2, mitochondrial
19	43520854	43521154	301	*	3.43482	4.24497	1.41506	2.7318	0.000322516	0.0118817	Intron (ENSMUST00000026196/ENSMUSG00000025190, intron 1 of 8)	19	43512254	43524485	12232	2	ENSMUSG00000025190	ENSMUST00000124954	3331	14718	Got1	glutamic-oxaloacetic transaminase 1, soluble
1	36064692	36064992	301	*	3.77243	4.45982	2.41264	1.97993	0.000324195	0.0118982	Promoter (3-4kb)	1	36068400	36106446	38047	1	ENSMUSG00000045216	ENSMUST00000088174	-3408	50785	Hs6st1	heparan sulfate 6-O-sulfotransferase 1
8	71542946	71543246	301	*	6.42947	6.77854	5.96803	0.766752	0.000324243	0.0118982	Promoter (<=1kb)	8	71542943	71545720	2778	1	ENSMUSG00000031813	ENSMUST00000212326	3	73711	Mvb12a	multivesicular body subunit 12A
2	31576393	31576693	301	*	3.11823	4.00359	0.407723	3.43704	0.000324524	0.0118982	Intron (ENSMUST00000113482/ENSMUSG00000026843, intron 1 of 18)	2	31572827	31598548	25722	1	ENSMUSG00000026843	ENSMUST00000154050	3566	320267	Fubp3	far upstream element (FUSE) binding protein 3
12	112976617	112976917	301	*	5.82667	5.33526	6.19255	-0.897783	0.000325	0.0118982	Promoter (<=1kb)	12	112976621	112977534	914	1	ENSMUSG00000002803	ENSMUST00000222209	0	399566	Btbd6	BTB (POZ) domain containing 6
8	108715051	108715351	301	*	6.01193	6.38084	5.51502	0.821537	0.000328808	0.0120187	5' UTR	8	108714644	108961630	246987	1	ENSMUSG00000038872	ENSMUST00000043896	407	11906	Zfhx3	zinc finger homeobox 3
9	44420084	44420384	301	*	3.48427	4.25147	1.73782	2.42832	0.000329385	0.012021	Promoter (1-2kb)	9	44410159	44418569	8411	2	ENSMUSG00000043923	ENSMUST00000053286	-1515	382073	Ccdc84	coiled-coil domain containing 84
12	112619976	112620276	301	*	4.48239	3.70235	4.98589	-1.31773	0.000330956	0.0120474	Promoter (<=1kb)	12	112620045	112641339	21295	1	ENSMUSG00000011148	ENSMUST00000021726	0	11565	Adssl1	adenylosuccinate synthetase like 1
4	98817306	98817606	301	*	6.0342	6.39938	5.54408	0.811077	0.000331651	0.0120474	Promoter (<=1kb)	4	98754898	98817537	62640	2	ENSMUSG00000035407	ENSMUST00000102790	0	242553	Kank4	KN motif and ankyrin repeat domains 4
17	23785935	23786235	301	*	5.24552	5.71616	4.54247	1.12697	0.000331655	0.0120474	Promoter (<=1kb)	17	23776916	23786081	9166	2	ENSMUSG00000023911	ENSMUST00000024704	0	76917	Flywch2	FLYWCH family member 2
17	87980939	87981239	301	*	3.09196	3.97439	0.416376	3.3996	0.000332755	0.0120526	Intron (ENSMUST00000005503/ENSMUSG00000005370, intron 2 of 9)	17	87979703	87984558	4856	1	ENSMUSG00000005370	ENSMUST00000234756	1236	17688	Msh6	mutS homolog 6
14	48655386	48655686	301	*	2.66371	3.62514	0	4.72466	0.000332829	0.0120526	Distal Intergenic	14	48652499	48652602	104	1	ENSMUSG00000087756	ENSMUST00000157131	2887
8	79029474	79029774	301	*	6.04758	6.40902	5.5642	0.800629	0.000334436	0.012092	Intron (ENSMUST00000087927/ENSMUSG00000071064, intron 1 of 2)	8	79028587	79190856	162270	1	ENSMUSG00000071064	ENSMUST00000238669	887	622675	Zfp827	zinc finger protein 827
7	141168393	141168693	301	*	4.28844	4.87879	3.27215	1.552	0.000340203	0.0122734	Promoter (<=1kb)	7	141160326	141168689	8364	2	ENSMUSG00000038650	ENSMUST00000210314	0	107702	Rnh1	ribonuclease/angiogenin inhibitor 1
4	127313769	127314069	301	*	4.8158	4.144	5.27237	-1.16523	0.000340614	0.0122734	Promoter (<=1kb)	4	127311421	127314039	2619	2	ENSMUSG00000050234	ENSMUST00000053753	0	14612	Gja4	gap junction protein, alpha 4
8	88137914	88138214	301	*	6.5455	6.88738	6.0966	0.747131	0.000341497	0.0122734	Promoter (<=1kb)	8	88138206	88138274	69	1	ENSMUSG00000099080	ENSMUST00000184847	0	102465649	Mir7071	microRNA 7071
8	111680526	111680826	301	*	4.29717	4.85685	3.37046	1.43301	0.000341554	0.0122734	Distal Intergenic	8	111689601	111689674	74	2	ENSMUSG00000099129	ENSMUST00000183519	8848	102466993	Mir7076	microRNA 7076
17	27056021	27056321	301	*	3.47674	4.24317	1.73466	2.42317	0.000342463	0.0122871	Promoter (<=1kb)	17	27057304	27122223	64920	1	ENSMUSG00000042644	ENSMUST00000049308	-983	16440	Itpr3	inositol 1,4,5-triphosphate receptor 3
10	80922210	80922510	301	*	3.169	4.02943	0.730058	3.16497	0.000346492	0.0123991	Promoter (3-4kb)	10	80901364	80918245	16882	2	ENSMUSG00000062075	ENSMUST00000179022	-3965	16907	Lmnb2	lamin B2
5	115415196	115415496	301	*	3.18685	4.04894	0.731536	3.18286	0.000346646	0.0123991	Intron (ENSMUST00000151159/ENSMUSG00000087292, intron 2 of 2)	5	115420597	115422500	1904	2	ENSMUSG00000106887	ENSMUST00000201293	7004
11	65270044	65270344	301	*	3.89389	2.73839	4.52717	-1.81189	0.000348251	0.012404	Promoter (<=1kb)	11	65176574	65269989	93416	2	ENSMUSG00000020542	ENSMUST00000108695	-55	214384	Myocd	myocardin
1	91536466	91536766	301	*	3.48594	4.30335	1.41352	2.79134	0.000348313	0.012404	Promoter (3-4kb)	1	91540544	91556088	15545	1	ENSMUSG00000026311	ENSMUST00000086843	-3778	65247	Asb1	ankyrin repeat and SOCS box-containing 1
4	98730609	98730909	301	*	4.8059	5.29506	4.06019	1.18631	0.000348376	0.012404	Promoter (2-3kb)	4	98733203	98738116	4914	1	ENSMUSG00000087166	ENSMUST00000173659	-2294	381591	L1td1	LINE-1 type transposase domain containing 1
8	125569467	125569767	301	*	6.20333	6.56519	5.71919	0.801963	0.000349129	0.0124119	Promoter (<=1kb)	8	125418074	125569756	151683	2	ENSMUSG00000001995	ENSMUST00000212168	0	244668	Sipa1l2	signal-induced proliferation-associated 1 like 2
8	71882010	71882310	301	*	5.8905	6.27128	5.37171	0.855053	0.000350439	0.0124395	Promoter (<=1kb)	8	71882019	71895727	13709	1	ENSMUSG00000056019	ENSMUST00000188685	0	236193	Zfp709	zinc finger protein 709
12	111377396	111377696	301	*	5.6254	5.1037	6.00774	-0.944073	0.000351637	0.0124603	Promoter (<=1kb)	12	111339821	111377619	37799	2	ENSMUSG00000021279	ENSMUST00000222196	0	217866	Cdc42bpb	CDC42 binding protein kinase beta
7	127217509	127217809	301	*	4.02993	4.68336	2.80255	1.82014	0.000352091	0.0124603	Exon (ENSMUST00000106314/ENSMUSG00000000486, exon 4 of 11)	7	127216972	127218231	1260	2	ENSMUSG00000000486	ENSMUST00000138541	422	54204	Septin1	septin 1
8	70476712	70477012	301	*	6.16164	6.53702	5.65285	0.840019	0.000353346	0.0124791	Promoter (<=1kb)	8	70450219	70476950	26732	2	ENSMUSG00000055707	ENSMUST00000209415	0	234378	Klhl26	kelch-like 26
2	125506721	125507021	301	*	3.82169	2.50355	4.49882	-2.01376	0.000353692	0.0124791	Promoter (<=1kb)	2	125300594	125506385	205792	2	ENSMUSG00000027204	ENSMUST00000028633	-336	14118	Fbn1	fibrillin 1
X	103457338	103457638	301	*	2.84218	3.77355	0	4.08557	0.000355339	0.0125183	Intron (ENSMUST00000182089/ENSMUSG00000098078, intron 1 of 1)	20	103461218	103461285	68	2	ENSMUSG00000099312	ENSMUST00000184803	3647
17	27038980	27039280	301	*	3.94041	4.58643	2.74004	1.78501	0.000359235	0.0126295	Distal Intergenic	17	27032859	27037624	4766	1	ENSMUSG00000048731	ENSMUST00000235543	6121	70772	Ggnbp1	gametogenetin binding protein 1
17	23679647	23679947	301	*	4.52399	3.77137	5.01608	-1.27945	0.000359575	0.0126295	Promoter (<=1kb)	17	23679659	23681962	2304	1	ENSMUSG00000023906	ENSMUST00000233364	0	54419	Cldn6	claudin 6
8	47288954	47289254	301	*	6.34296	6.68198	5.89899	0.73921	0.00036045	0.0126412	5' UTR	8	47185956	47289362	103407	2	ENSMUSG00000038143	ENSMUST00000211737	108	71069	Stox2	storkhead box 2
6	136532707	136533007	301	*	2.84271	3.77432	0	4.0906	0.00036159	0.0126621	Promoter (<=1kb)	6	136532927	136587668	54742	1	ENSMUSG00000030213	ENSMUST00000187429	0	54343	Atf7ip	activating transcription factor 7 interacting protein
11	106723982	106724282	301	*	4.88234	5.36917	4.1421	1.17887	0.000362392	0.0126712	Intron (ENSMUST00000068021/ENSMUSG00000020717, intron 1 of 15)	11	106654218	106715394	61177	2	ENSMUSG00000020717	ENSMUST00000106796	-8588	18613	Pecam1	platelet/endothelial cell adhesion molecule 1
2	51446970	51447270	301	*	3.47867	4.2695	1.58928	2.58909	0.000363154	0.0126789	Distal Intergenic	2	51420984	51438785	17802	2	ENSMUSG00000086007	ENSMUST00000152467	-8185	73375	1700057H21Rik	RIKEN cDNA 1700057H21 gene
8	105254428	105254728	301	*	6.1614	6.52016	5.6828	0.79331	0.000369898	0.0128951	Exon (ENSMUST00000136822/ENSMUSG00000069920, exon 1 of 1)	8	105252639	105255151	2513	2	ENSMUSG00000069920	ENSMUST00000093217	423	97440	B3gnt9	UDP-GlcNAc:betaGal beta-1,3-N-acetylglucosaminyltransferase 9
8	84236773	84237073	301	*	5.6882	6.08293	5.14302	0.895002	0.000370733	0.0129049	Promoter (<=1kb)	8	84210678	84237055	26378	2	ENSMUSG00000035671	ENSMUST00000039480	0	212168	Zswim4	zinc finger SWIM-type containing 4
11	98962821	98963121	301	*	4.79904	5.31043	3.9996	1.26179	0.000373004	0.0129639	Intron (ENSMUST00000107474/ENSMUSG00000037992, intron 2 of 8)	11	98960412	98974942	14531	1	ENSMUSG00000037992	ENSMUST00000107473	2409	19401	Rara	retinoic acid receptor, alpha
12	110446557	110446857	301	*	5.58977	5.07237	5.96981	-0.937438	0.000373536	0.0129639	Promoter (<=1kb)	12	110447120	110450999	3880	1	ENSMUSG00000017843	ENSMUST00000222276	-263	26931	Ppp2r5c	protein phosphatase 2, regulatory subunit B', gamma
7	126859677	126859977	301	*	3.5878	4.35038	1.86749	2.40152	0.000374224	0.0129685	Exon (ENSMUST00000154881/ENSMUSG00000030689, exon 3 of 3)	7	126850960	126861271	10312	2	ENSMUSG00000030689	ENSMUST00000205619	1294	233875	Ino80e	INO80 complex subunit E
3	95891637	95891937	301	*	3.45977	4.22295	1.7361	2.40167	0.00037527	0.0129854	Promoter (<=1kb)	3	95884973	95891930	6958	2	ENSMUSG00000038543	ENSMUST00000171519	0	229600	BC028528	cDNA sequence BC028528
10	78037778	78038078	301	*	4.59446	5.10128	3.80632	1.24505	0.000375825	0.0129854	3' UTR	10	78030023	78038258	8236	2	ENSMUSG00000000731	ENSMUST00000143548	180	11634	Aire	autoimmune regulator (autoimmune polyendocrinopathy candidiasis ectodermal dystrophy)
8	85840486	85840786	301	*	6.41825	6.75557	5.9772	0.734649	0.000377004	0.0130069	5' UTR	8	85717578	85840921	123344	2	ENSMUSG00000031703	ENSMUST00000034140	135	71927	Itfg1	integrin alpha FG-GAP repeat containing 1
8	94913065	94913365	301	*	5.45926	5.87531	4.87227	0.957507	0.000380556	0.0131009	Exon (ENSMUST00000077955/ENSMUSG00000063605, exon 2 of 9)	8	94913565	94917521	3957	2	ENSMUSG00000063605	ENSMUST00000162020	4156	234582	Ccdc102a	coiled-coil domain containing 102A
17	12507072	12507372	301	*	4.52515	3.77173	5.01757	-1.28058	0.000380851	0.0131009	Promoter (<=1kb)	17	12418960	12507416	88457	2	ENSMUSG00000023828	ENSMUST00000233535	44	20519	Slc22a3	solute carrier family 22 (organic cation transporter), member 3
8	78509062	78509362	301	*	6.5554	6.90392	6.09492	0.765335	0.000383436	0.0131501	Promoter (<=1kb)	8	78509346	78712757	203412	1	ENSMUSG00000031684	ENSMUST00000211332	0	76775	Slc10a7	solute carrier family 10 (sodium/bile acid cotransporter family), member 7
11	89003593	89003893	301	*	3.11745	3.97202	0.735033	3.10313	0.000383618	0.0131501	Intron (ENSMUST00000100627/ENSMUSG00000000275, intron 1 of 4)	11	88999376	89020293	20918	1	ENSMUSG00000000275	ENSMUST00000107896	4217	217069	Trim25	tripartite motif-containing 25
11	96252603	96252903	301	*	3.56494	4.36783	1.59585	2.6803	0.000384754	0.0131501	Promoter (<=1kb)	11	96252532	96261693	9162	1	ENSMUSG00000078706	ENSMUST00000139381	71
7	45560502	45560802	301	*	4.42726	4.98484	3.50642	1.42602	0.000384825	0.0131501	Promoter (1-2kb)	7	45562096	45566184	4089	1	ENSMUSG00000030825	ENSMUST00000209566	-1294	66065	Hsd17b14	hydroxysteroid (17-beta) dehydrogenase 14
11	68954367	68954667	301	*	4.5025	3.73692	5.00002	-1.29757	0.000385162	0.0131501	Exon (ENSMUST00000065040/ENSMUSG00000052921, exon 1 of 15)	11	68943155	68955074	11920	2	ENSMUSG00000052921	ENSMUST00000065040	407	442801	Arhgef15	Rho guanine nucleotide exchange factor (GEF) 15
7	92670212	92670512	301	*	4.59577	5.13066	3.73634	1.34368	0.000385657	0.0131501	Promoter (<=1kb)	7	92643543	92669934	26392	2	ENSMUSG00000041328	ENSMUST00000119954	-278	74737	Pcf11	PCF11 cleavage and polyadenylation factor subunit
8	107588002	107588302	301	*	7.04073	7.36595	6.62018	0.702489	0.000388778	0.0132288	Exon (ENSMUST00000044106/ENSMUSG00000039067, exon 1 of 7)	8	107587599	107588458	860	2	ENSMUSG00000039067	ENSMUST00000213080	156	17463	Psmd7	proteasome (prosome, macropain) 26S subunit, non-ATPase, 7
2	27544452	27544752	301	*	3.24218	4.0818	0.993583	2.97007	0.0003891	0.0132288	Distal Intergenic	2	27540429	27543185	2757	1	ENSMUSG00000085929	ENSMUST00000132898	4023	105244102	Gm13421	predicted gene 13421
11	116972888	116973188	301	*	2.84714	3.77839	0	4.08314	0.000390974	0.0132732	Promoter (<=1kb)	11	116973073	116986940	13868	1	ENSMUSG00000043857	ENSMUST00000126757	0	268510	Mgat5b	mannoside acetylglucosaminyltransferase 5, isoenzyme B
8	91070144	91070444	301	*	6.63676	6.97751	6.1898	0.744147	0.00039517	0.0133962	Promoter (<=1kb)	8	91070158	91123842	53685	1	ENSMUSG00000031666	ENSMUST00000209518	0	19651	Rbl2	RB transcriptional corepressor like 2
6	112489181	112489481	301	*	4.13138	3.16826	4.70383	-1.56477	0.00039624	0.013413	Exon (ENSMUST00000053306/ENSMUSG00000049112, exon 1 of 2)	6	112473683	112489943	16261	2	ENSMUSG00000049112	ENSMUST00000053306	462	18430	Oxtr	oxytocin receptor
19	34474928	34475228	301	*	4.60724	3.87484	5.0907	-1.25124	0.000397352	0.0134162	Promoter (<=1kb)	19	34473778	34475164	1387	2	ENSMUSG00000050370	ENSMUST00000050562	0	12642	Ch25h	cholesterol 25-hydroxylase
8	107263255	107263555	301	*	4.1013	4.71918	2.9978	1.66367	0.000397482	0.0134162	Promoter (<=1kb)	8	107262793	107263248	456	2	ENSMUSG00000057657	ENSMUST00000080443	-7	100042791	Rps18-ps3	ribosomal protein S18, pseudogene 3
8	84021058	84021358	301	*	4.27332	4.84085	3.32437	1.46261	0.000401239	0.0135234	Promoter (<=1kb)	8	84021471	84029188	7718	1	ENSMUSG00000047986	ENSMUST00000142367	-113	74337	Palm3	paralemmin 3
8	124793760	124794060	301	*	5.43758	5.85775	4.84229	0.96983	0.000403922	0.0135943	5' UTR	8	124793092	124834713	41622	1	ENSMUSG00000036913	ENSMUST00000211867	668	330863	Trim67	tripartite motif-containing 67
2	173228033	173228333	301	*	3.58289	4.31886	2.00292	2.23876	0.000405775	0.0136237	Exon (ENSMUST00000036248/ENSMUSG00000038400, exon 4 of 4)	2	173228211	173234722	6512	2	ENSMUSG00000038400	ENSMUST00000124124	6389	65112	Pmepa1	prostate transmembrane protein, androgen induced 1
19	46073892	46074192	301	*	3.34789	4.14601	1.41095	2.63758	0.000405964	0.0136237	Promoter (1-2kb)	19	46075863	46085528	9666	1	ENSMUSG00000015176	ENSMUST00000165017	-1671	70769	Nolc1	nucleolar and coiled-body phosphoprotein 1
12	108178671	108178971	301	*	6.03349	5.60351	6.36431	-0.801794	0.000406846	0.0136337	Intron (ENSMUST00000071095/ENSMUSG00000056770, intron 1 of 12)	12	108157984	108179213	21230	2	ENSMUSG00000056770	ENSMUST00000125916	242	52690	Setd3	SET domain containing 3
13	111580355	111580655	301	*	3.11921	3.97396	0.735034	3.10506	0.000407431	0.0136338	Promoter (<=1kb)	13	111580261	111644830	64570	1	ENSMUSG00000086649	ENSMUST00000156236	94	105245631	Gm15286	predicted gene 15286
9	58234484	58234784	301	*	3.90624	4.56299	2.66656	1.8338	0.000410517	0.0137058	Promoter (1-2kb)	9	58230391	58233395	3005	2	ENSMUSG00000036986	ENSMUST00000138775	-1089	18854	Pml	promyelocytic leukemia
11	97428030	97428330	301	*	4.40561	4.97252	3.45844	1.46125	0.000410758	0.0137058	Intron (ENSMUST00000121799/ENSMUSG00000049807, intron 1 of 23)	11	97436285	97444228	7944	1	ENSMUSG00000049807	ENSMUST00000152933	-7955	58996	Arhgap23	Rho GTPase activating protein 23
11	120011906	120012206	301	*	4.11859	3.11592	4.70444	-1.61696	0.000412696	0.0137508	Exon (ENSMUST00000142959/ENSMUSG00000025375, exon 1 of 3)	11	120007313	120012408	5096	2	ENSMUSG00000025375	ENSMUST00000142959	202	11302	Aatk	apoptosis-associated tyrosine kinase
15	72810248	72810548	301	*	3.77549	4.46379	2.41192	1.9846	0.000415636	0.0138291	Promoter (<=1kb)	15	72805600	72810324	4725	2	ENSMUSG00000106847	ENSMUST00000202826	0	353342	Peg13	paternally expressed 13
2	18587406	18587706	301	*	4.24855	3.37054	4.79045	-1.45132	0.00041743	0.013869	Distal Intergenic	2	18568126	18568198	73	1	ENSMUSG00000081181	ENSMUST00000120891	19280
8	95633627	95633927	301	*	6.37886	6.72817	5.917	0.767364	0.000423364	0.0140462	Promoter (<=1kb)	8	95633554	95638233	4680	1	ENSMUSG00000031669	ENSMUST00000212434	73	78833	Gins3	GINS complex subunit 3 (Psf3 homolog)
1	134571944	134572244	301	*	2.97013	3.87445	0.00818403	3.66874	0.000424755	0.0140723	Intron (ENSMUST00000047714/ENSMUSG00000042207, intron 1 of 26)	1	134560207	134606791	46585	1	ENSMUSG00000042207	ENSMUST00000112197	11737	75605	Kdm5b	lysine (K)-specific demethylase 5B
1	134565552	134565852	301	*	3.20071	4.06444	0.728903	3.20086	0.000428109	0.0141634	Intron (ENSMUST00000047714/ENSMUSG00000042207, intron 1 of 26)	1	134560207	134606791	46585	1	ENSMUSG00000042207	ENSMUST00000112197	5345	75605	Kdm5b	lysine (K)-specific demethylase 5B
12	111284674	111284974	301	*	2.99812	0.413289	3.87258	-3.38281	0.000428813	0.0141666	Promoter (<=1kb)	12	111284762	111287377	2616	1	ENSMUSG00000097381	ENSMUST00000181561	0
5	139547142	139547442	301	*	3.88629	2.58085	4.56022	-1.99926	0.00043034	0.014197	Exon (ENSMUST00000172997/ENSMUSG00000029546, exon 3 of 3)	5	139543898	139545268	1371	1	ENSMUSG00000029546	ENSMUST00000174792	3244	22255	Uncx	UNC homeobox
17	66364046	66364346	301	*	5.12864	5.57397	4.48112	1.04616	0.000432364	0.0142376	Intron (ENSMUST00000086693/ENSMUSG00000052105, intron 8 of 13)	17	66366344	66374664	8321	2	ENSMUSG00000052105	ENSMUST00000129841	10318	68617	Mtcl1	microtubule crosslinking factor 1
11	102582654	102582954	301	*	3.64319	4.36985	2.1087	2.18689	0.000432792	0.0142376	Promoter (3-4kb)	11	102576398	102579461	3064	2	ENSMUSG00000078640	ENSMUST00000107081	-3193	100040792	Gm11627	predicted gene 11627
11	93098161	93098461	301	*	4.02831	2.93948	4.6417	-1.72825	0.000438263	0.0143792	Promoter (<=1kb)	11	93098404	93368999	270596	1	ENSMUSG00000056158	ENSMUST00000107859	0	72605	Car10	carbonic anhydrase 10
5	53556175	53556475	301	*	5.39254	5.8236	4.77498	1.00278	0.000438325	0.0143792	Exon (ENSMUST00000201721/ENSMUSG00000039191, exon 1 of 1)	5	53555834	53657358	101525	1	ENSMUSG00000039191	ENSMUST00000087360	341	19664	Rbpj	recombination signal binding protein for immunoglobulin kappa J region
15	77078378	77078678	301	*	4.2742	4.84395	3.31889	1.47116	0.00043957	0.0143998	Distal Intergenic	15	77084398	77091119	6722	1	ENSMUSG00000097267	ENSMUST00000227532	-5720	74303	1700109K24Rik	RIKEN cDNA 1700109K24 gene
11	22972451	22972751	301	*	5.94641	6.30388	5.47012	0.789473	0.000442727	0.0144829	5' UTR	11	22900023	22972859	72837	2	ENSMUSG00000051355	ENSMUST00000162924	108	17846	Commd1	COMM domain containing 1
8	121585140	121585440	301	*	5.52257	5.92148	4.96934	0.906898	0.000444711	0.0145219	Intron (ENSMUST00000127664/ENSMUSG00000092329, intron 1 of 15)	8	121581765	121582191	427	1	ENSMUSG00000097987	ENSMUST00000182000	3375	100048204	Gm17786	predicted gene, 17786
13	62264542	62264842	301	*	3.71994	4.41627	2.32257	2.02456	0.000445162	0.0145219	Intron (ENSMUST00000221637/ENSMUSG00000113081, intron 1 of 2)	13	62263566	62273287	9722	1	ENSMUSG00000113081	ENSMUST00000221637	976
8	123318242	123318542	301	*	5.57967	5.96966	5.04355	0.881062	0.000447367	0.0145601	Promoter (<=1kb)	8	123286189	123318560	32372	2	ENSMUSG00000032815	ENSMUST00000155488	18	14087	Fanca	Fanconi anemia, complementation group A
8	123065574	123065874	301	*	6.74222	7.06768	6.32128	0.702947	0.000447582	0.0145601	Promoter (<=1kb)	8	123065508	123097751	32244	1	ENSMUSG00000000738	ENSMUST00000128803	66	234847	Spg7	SPG7, paraplegin matrix AAA peptidase subunit
17	45619522	45619822	301	*	4.61411	5.1286	3.80696	1.27163	0.000448926	0.0145835	Promoter (<=1kb)	17	45620679	45620759	81	1	ENSMUSG00000065743	ENSMUST00000083809	-857	115488875	Gm25008	predicted gene, 25008
6	58906724	58907024	301	*	4.00077	4.62541	2.87476	1.69143	0.000451382	0.014643	Promoter (<=1kb)	6	58905804	58906673	870	2	ENSMUSG00000055430	ENSMUST00000205101	-51	58243	Nap1l5	nucleosome assembly protein 1-like 5
8	69654538	69654838	301	*	5.62096	6.03031	5.04729	0.937858	0.000454301	0.0146835	Promoter (<=1kb)	8	69654492	69666982	12491	1	ENSMUSG00000091764	ENSMUST00000204285	46	636741	Zfp964	zinc finger protein 964
9	58008617	58008917	301	*	3.84047	4.52408	2.49619	1.96217	0.000454325	0.0146835	Intron (ENSMUST00000188116/ENSMUSG00000032323, intron 1 of 3)	9	58006411	58020742	14332	1	ENSMUSG00000032323	ENSMUST00000188116	2206	13070	Cyp11a1	cytochrome P450, family 11, subfamily a, polypeptide 1
6	88894657	88894957	301	*	3.62532	4.34771	2.11113	2.16248	0.000454518	0.0146835	Promoter (<=1kb)	6	88893169	88893727	559	2	ENSMUSG00000002870	ENSMUST00000203172	-930	17216	Mcm2	minichromosome maintenance complex component 2
3	87999861	88000161	301	*	4.99934	4.36797	5.43703	-1.10692	0.000456016	0.0147109	Promoter (<=1kb)	3	87987531	88000230	12700	2	ENSMUSG00000004892	ENSMUST00000090971	69	12032	Bcan	brevican
8	84203407	84203707	301	*	4.77365	5.2494	4.05903	1.14196	0.000457107	0.0147109	Distal Intergenic	8	84200869	84203049	2181	1	ENSMUSG00000103593	ENSMUST00000193908	2538
7	19469598	19469898	301	*	4.08858	3.11397	4.66498	-1.57962	0.000457254	0.0147109	Exon (ENSMUST00000137613/ENSMUSG00000011263, exon 2 of 12)	7	19468228	19468549	322	1	ENSMUSG00000109301	ENSMUST00000208007	1370
7	27197493	27197793	301	*	2.31843	3.31843	0	6.31552	0.000459107	0.0147502	Intron (ENSMUST00000179391/ENSMUSG00000078786, intron 2 of 6)	7	27197123	27204161	7039	1	ENSMUSG00000078786	ENSMUST00000155931	370	414069	BC024978	cDNA sequence BC024978
10	85624831	85625131	301	*	3.50346	4.27545	1.72938	2.46048	0.000461239	0.0147983	Promoter (4-5kb)	10	85629515	85641636	12122	1	ENSMUSG00000020042	ENSMUST00000145323	-4384	74007	Btbd11	BTB (POZ) domain containing 11
2	164168135	164168435	301	*	4.65328	3.97006	5.11505	-1.18106	0.000461905	0.0147993	Exon (ENSMUST00000045196/ENSMUSG00000040164, exon 3 of 4)	2	164163619	164171113	7495	2	ENSMUSG00000040164	ENSMUST00000045196	2678	16538	Kcns1	K+ voltage-gated channel, subfamily S, 1
9	52678090	52678390	301	*	3.22403	1.22552	4.03117	-2.78275	0.000465125	0.0148775	5' UTR	9	52673044	52679429	6386	2	ENSMUSG00000078307	ENSMUST00000098768	1039	330941	AI593442	expressed sequence AI593442
17	47569899	47570199	301	*	3.19396	4.05635	0.735566	3.18628	0.000465835	0.0148775	Intron (ENSMUST00000182129/ENSMUSG00000034165, intron 1 of 5)	17	47593436	47598174	4739	1	ENSMUSG00000034165	ENSMUST00000182281	-23237	12445	Ccnd3	cyclin D3
13	21279246	21279546	301	*	4.07276	3.11399	4.64371	-1.55843	0.000466257	0.0148775	Distal Intergenic	13	21286429	21292731	6303	2	ENSMUSG00000004344	ENSMUST00000110491	13185	14780	Gpx5	glutathione peroxidase 5
8	71988793	71989093	301	*	4.36845	4.90588	3.50231	1.35148	0.000469916	0.0149738	Exon (ENSMUST00000003574/ENSMUSG00000003484, exon 12 of 13)	8	71988483	71992915	4433	2	ENSMUSG00000003484	ENSMUST00000141975	3822	72054	Cyp4f18	cytochrome P450, family 4, subfamily f, polypeptide 18
8	72161403	72161703	301	*	6.79467	7.11181	6.38758	0.680837	0.000471029	0.0149889	Promoter (<=1kb)	8	72161359	72176057	14699	1	ENSMUSG00000003037	ENSMUST00000128203	44	17274	Rab8a	RAB8A, member RAS oncogene family
8	33914563	33914863	301	*	3.3665	4.16764	1.40931	2.66067	0.000473258	0.0150393	Intron (ENSMUST00000053251/ENSMUSG00000031586, intron 1 of 7)	8	33806768	33929276	122509	2	ENSMUSG00000031586	ENSMUST00000231786	14413	19663	Rbpms	RNA binding protein gene with multiple splicing
8	94772207	94772507	301	*	4.82322	5.29703	4.11301	1.13585	0.000475881	0.0151021	Promoter (<=1kb)	8	94772225	94780022	7798	1	ENSMUSG00000031778	ENSMUST00000150307	0	20312	Cx3cl1	chemokine (C-X3-C motif) ligand 1
4	44014282	44014582	301	*	3.66102	4.36741	2.2199	2.07615	0.000476906	0.0151141	Intron (ENSMUST00000107846/ENSMUSG00000028478, intron 2 of 5)	4	44012686	44032846	20161	1	ENSMUSG00000028478	ENSMUST00000107845	1596	12757	Clta	clathrin, light polypeptide (Lca)
8	95081262	95081562	301	*	6.26394	6.60054	5.82411	0.732589	0.000481356	0.0152345	Promoter (<=1kb)	8	95081186	95100211	19026	1	ENSMUSG00000031787	ENSMUST00000034239	76	74187	Katnb1	katanin p80 (WD40-containing) subunit B 1
7	27311513	27311813	301	*	4.19763	4.77337	3.22494	1.49362	0.000484314	0.0152898	Promoter (<=1kb)	7	27307560	27310678	3119	2	ENSMUSG00000040488	ENSMUST00000148594	-835	108075	Ltbp4	latent transforming growth factor beta binding protein 4
8	75213164	75213464	301	*	5.82962	6.19719	5.33513	0.817568	0.000484415	0.0152898	Promoter (<=1kb)	8	75213944	75224113	10170	1	ENSMUSG00000034472	ENSMUST00000139848	-480	75141	Rasd2	RASD family, member 2
8	123477921	123478221	301	*	6.41043	6.76413	5.94083	0.779493	0.000485306	0.0152973	Promoter (<=1kb)	8	123477940	123481293	3354	1	ENSMUSG00000031967	ENSMUST00000133606	0	114896	Afg3l1	AFG3-like AAA ATPase 1
15	84185736	84186036	301	*	2.80489	3.73442	0	4.04682	0.000486059	0.0153004	Promoter (<=1kb)	15	84186014	84187236	1223	1	ENSMUSG00000041653	ENSMUST00000230926	0	116939	Pnpla3	patatin-like phospholipase domain containing 3
7	139947718	139948018	301	*	3.43836	4.22422	1.58049	2.5528	0.000488103	0.015344	Promoter (2-3kb)	7	139950396	139963327	12932	1	ENSMUSG00000086742	ENSMUST00000134312	-2378	102635948	Gm16201	predicted gene 16201
5	135892896	135893196	301	*	2.81257	3.74249	0	4.05483	0.000489789	0.0153659	Distal Intergenic	5	135896330	135896486	157	2	ENSMUSG00000105047	ENSMUST00000196247	3290
2	37775923	37776223	301	*	3.41186	1.73421	4.16667	-2.43099	0.000490113	0.0153659	Promoter (<=1kb)	2	37776249	37799103	22855	1	ENSMUSG00000035403	ENSMUST00000050372	-26	241324	Crb2	crumbs family member 2
7	29124875	29125175	301	*	4.38838	4.94995	3.45636	1.44083	0.000493193	0.0154417	Promoter (<=1kb)	7	29003344	29125015	121672	2	ENSMUSG00000030592	ENSMUST00000214374	0	20190	Ryr1	ryanodine receptor 1, skeletal muscle
11	72444417	72444717	301	*	3.29662	4.11432	1.22198	2.78606	0.000495042	0.0154683	Exon (ENSMUST00000045633/ENSMUSG00000040463, exon 9 of 26)	11	72443772	72444563	792	1	ENSMUSG00000040463	ENSMUST00000134119	645	18432	Mybbp1a	MYB binding protein (P160) 1a
5	115050352	115050652	301	*	3.72023	4.43793	2.22791	2.13831	0.000495772	0.0154683	Intron (ENSMUST00000031530/ENSMUSG00000029550, intron 1 of 10)	5	115053469	115053840	372	2	ENSMUSG00000086167	ENSMUST00000148801	3188
2	165814284	165814584	301	*	3.56323	4.32005	1.87462	2.36431	0.00049603	0.0154683	Intron (ENSMUST00000109266/ENSMUSG00000039671, intron 12 of 21)	2	165845744	165852122	6379	2	ENSMUSG00000039671	ENSMUST00000139202	37538	228880	Zmynd8	zinc finger, MYND-type containing 8
3	108571800	108572100	301	*	5.1086	5.5539	4.46114	1.046	0.000497636	0.0154977	Promoter (<=1kb)	3	108571711	108573304	1594	1	ENSMUSG00000048100	ENSMUST00000139603	89	99730	Taf13	TATA-box binding protein associated factor 13
8	87960230	87960530	301	*	5.98875	6.34033	5.5229	0.77324	0.00050018	0.0155512	Promoter (<=1kb)	8	87661810	87959595	297786	2	ENSMUSG00000045333	ENSMUST00000109655	-635	94187	Zfp423	zinc finger protein 423
2	170202030	170202330	301	*	4.61383	5.15573	3.73581	1.36919	0.000500685	0.0155512	Distal Intergenic	2	170120719	170148103	27385	2	ENSMUSG00000052056	ENSMUST00000149318	-53927	228913	Zfp217	zinc finger protein 217
17	45733812	45734112	301	*	4.78365	4.08714	5.25139	-1.20078	0.000505815	0.0156805	Promoter (<=1kb)	17	45732864	45733844	981	2	ENSMUSG00000094690	ENSMUST00000178179	0	72240	1600014C23Rik	RIKEN cDNA 1600014C23 gene
4	150878960	150879260	301	*	3.22215	4.05956	0.992207	2.94936	0.000506192	0.0156805	Distal Intergenic	4	150897384	150901835	4452	2	ENSMUSG00000028964	ENSMUST00000132265	22575	57320	Park7	Parkinson disease (autosomal recessive, early onset) 7
16	4885415	4885715	301	*	4.27123	4.83961	3.31988	1.46584	0.000508178	0.0157092	Promoter (<=1kb)	16	4886249	4938295	52047	1	ENSMUSG00000022517	ENSMUST00000023159	-534	17237	Mgrn1	mahogunin, ring finger 1
5	113226032	113226332	301	*	3.69865	2.4157	4.36681	-1.96838	0.000508463	0.0157092	Promoter (<=1kb)	5	113226909	113239263	12355	1	ENSMUSG00000066964	ENSMUST00000086615	-577	333048	Tmem211	transmembrane protein 211
8	69749704	69750004	301	*	5.89628	6.26945	5.39158	0.833432	0.000512769	0.0158213	Promoter (<=1kb)	8	69741639	69749962	8324	2	ENSMUSG00000092260	ENSMUST00000130458	0	620419	Zfp963	zinc finger protein 963
8	120228869	120229169	301	*	6.07953	6.44618	5.58674	0.815256	0.000513926	0.0158361	Exon (ENSMUST00000180448/ENSMUSG00000031822, exon 1 of 3)	8	120228456	120553634	325179	1	ENSMUSG00000031822	ENSMUST00000180448	413	382034	Gse1	genetic suppressor element 1, coiled-coil protein
8	110618582	110618882	301	*	6.86323	7.18682	6.44542	0.698018	0.000514734	0.0158401	Promoter (<=1kb)	8	110618585	110720396	101812	1	ENSMUSG00000010936	ENSMUST00000213003	0	234729	Vac14	Vac14 homolog (S. cerevisiae)
5	147155085	147155385	301	*	3.50067	4.26995	1.74232	2.44221	0.000520123	0.0159849	Distal Intergenic	5	147188696	147190947	2252	1	ENSMUSG00000053129	ENSMUST00000065382	-33311	14842	Gsx1	GS homeobox 1
2	70568510	70568810	301	*	2.87129	0	3.76919	-3.65259	0.000523093	0.016055	Intron (ENSMUST00000130604/ENSMUSG00000070880, intron 3 of 8)	2	70566377	70602012	35636	1	ENSMUSG00000070880	ENSMUST00000140478	2133	14415	Gad1	glutamate decarboxylase 1
7	12924866	12925166	301	*	4.63452	5.129	3.87619	1.20338	0.000525467	0.0160995	Promoter (2-3kb)	7	12927416	12931072	3657	1	ENSMUSG00000033967	ENSMUST00000045870	-2250	381845	Rnf225	ring finger protein 225
15	85131716	85132016	301	*	4.56475	5.07439	3.76965	1.25462	0.000525922	0.0160995	Promoter (<=1kb)	15	85064689	85131964	67276	2	ENSMUSG00000022432	ENSMUST00000023068	0	140557	Smc1b	structural maintenance of chromosomes 1B
10	80226034	80226334	301	*	2.76515	0	3.69248	-4.07986	0.000527337	0.0161039	Promoter (<=1kb)	10	80226434	80243903	17470	1	ENSMUSG00000020156	ENSMUST00000020365	-100	68114	Pwwp3a	PWWP domain containing 3A, DNA repair factor
7	3578555	3578855	301	*	3.83905	4.5	2.58365	1.85249	0.000527443	0.0161039	Distal Intergenic	7	3589164	3589264	101	1	ENSMUSG00000095674	ENSMUST00000179750	-10309
17	30608171	30608471	301	*	3.49926	4.26863	1.7404	2.44278	0.000528225	0.0161067	Exon (ENSMUST00000236095/ENSMUSG00000117749, exon 1 of 1)	17	30607056	30608265	1210	1	ENSMUSG00000117749	ENSMUST00000236095	1115
8	121652735	121653035	301	*	5.69131	6.07452	5.16797	0.861735	0.000528962	0.0161082	Promoter (<=1kb)	8	121598703	121652901	54199	2	ENSMUSG00000061410	ENSMUST00000046386	0	142682	Zcchc14	zinc finger, CCHC domain containing 14
11	103103209	103103509	301	*	4.09451	4.72927	2.93391	1.73662	0.000530124	0.0161175	Promoter (<=1kb)	11	103103252	103104482	1231	1	ENSMUSG00000056938	ENSMUST00000142630	0	67131	Acbd4	acyl-Coenzyme A binding domain containing 4
8	111643485	111643785	301	*	6.48133	6.80685	6.06028	0.702945	0.000530898	0.0161175	Promoter (<=1kb)	8	111643506	111671011	27506	1	ENSMUSG00000055835	ENSMUST00000077791	0	22640	Zfp1	zinc finger protein 1
8	70797480	70797780	301	*	5.95511	6.32424	5.45778	0.822123	0.000531338	0.0161175	Promoter (<=1kb)	8	70798135	70798192	58	1	ENSMUSG00000099031	ENSMUST00000184074	-355	102466823	Mir7240	microRNA 7240
8	85083289	85083589	301	*	6.00433	6.36548	5.52145	0.799799	0.000540101	0.0163391	Promoter (<=1kb)	8	85083304	85087278	3975	1	ENSMUSG00000005142	ENSMUST00000209361	0	17159	Man2b1	mannosidase 2, alpha B1
9	66126846	66127146	301	*	4.59781	5.11937	3.77283	1.29627	0.000540348	0.0163391	5' UTR	9	66126611	66138955	12345	1	ENSMUSG00000032381	ENSMUST00000034945	235	68250	Ciao2a	cytosolic iron-sulfur assembly component 2A
8	94186461	94186761	301	*	3.7715	4.48084	2.31724	2.09404	0.000540743	0.0163391	Distal Intergenic	8	94183289	94184969	1681	1	ENSMUSG00000110524	ENSMUST00000212456	3172
5	108061656	108061956	301	*	4.50162	5.01294	3.70235	1.26006	0.000542621	0.0163747	Promoter (3-4kb)	5	108065674	108107163	41490	1	ENSMUSG00000029267	ENSMUST00000131291	-3718	17765	Mtf2	metal response element binding transcription factor 2
18	12879773	12880073	301	*	2.27566	3.27566	0	6.2733	0.00054431	0.0164045	Promoter (<=1kb)	18	12756192	12879977	123786	2	ENSMUSG00000044252	ENSMUST00000119512	0	64291	Osbpl1a	oxysterol binding protein-like 1A
3	152106882	152107182	301	*	4.27638	3.41663	4.8114	-1.42663	0.00054616	0.016439	Promoter (<=1kb)	3	152093841	152107032	13192	2	ENSMUSG00000039131	ENSMUST00000128741	0	54120	Gipc2	GIPC PDZ domain containing family, member 2
12	79089292	79089592	301	*	5.79028	6.15637	5.2985	0.813339	0.000547227	0.0164499	Promoter (<=1kb)	12	79081248	79089645	8398	2	ENSMUSG00000021120	ENSMUST00000217998	53	110417	Pigh	phosphatidylinositol glycan anchor biosynthesis, class H
2	166014124	166014424	301	*	3.55478	4.31078	1.87069	2.35897	0.000548784	0.0164755	Intron (ENSMUST00000109252/ENSMUSG00000027678, intron 1 of 22)	2	165992637	166073242	80606	1	ENSMUSG00000027678	ENSMUST00000088095	21487	17979	Ncoa3	nuclear receptor coactivator 3
19	5492796	5493096	301	*	3.44026	4.22627	1.58141	2.55394	0.000551607	0.016539	Exon (ENSMUST00000209469/ENSMUSG00000056201, exon 2 of 4)	19	5490565	5493579	3015	1	ENSMUSG00000056201	ENSMUST00000237122	2231	12631	Cfl1	cofilin 1, non-muscle
8	84270069	84270369	301	*	6.47927	6.80359	6.06025	0.699728	0.000555786	0.016643	Promoter (<=1kb)	8	84258301	84270347	12047	2	ENSMUSG00000004994	ENSMUST00000005120	0	67736	Ccdc130	coiled-coil domain containing 130
8	106935823	106936123	301	*	6.84628	7.16407	6.43812	0.682587	0.000558912	0.0167029	Promoter (<=1kb)	8	106936149	106981744	45596	1	ENSMUSG00000041308	ENSMUST00000212298	-26	20650	Sntb2	syntrophin, basic 2
5	110435668	110435968	301	*	3.44232	4.2548	1.40591	2.75062	0.00055922	0.0167029	Promoter (2-3kb)	5	110429875	110433321	3447	2	ENSMUSG00000043323	ENSMUST00000198415	-2347	381668	Fbrsl1	fibrosin-like 1
8	120472302	120472602	301	*	2.58258	3.54189	0	4.64686	0.000563284	0.0167987	Intron (ENSMUST00000127664/ENSMUSG00000092329, intron 1 of 15)	8	120488447	120581390	92944	1	ENSMUSG00000031822	ENSMUST00000034279	-15845	382034	Gse1	genetic suppressor element 1, coiled-coil protein
8	87974791	87975091	301	*	4.96849	5.44883	4.24332	1.15776	0.000564293	0.0167987	Distal Intergenic	8	87661810	87959595	297786	2	ENSMUSG00000045333	ENSMUST00000109655	-15196	94187	Zfp423	zinc finger protein 423
8	33923837	33924137	301	*	2.2687	3.2687	0	6.26641	0.000564582	0.0167987	Intron (ENSMUST00000053251/ENSMUSG00000031586, intron 1 of 7)	8	33806768	33929276	122509	2	ENSMUSG00000031586	ENSMUST00000231786	5139	19663	Rbpms	RNA binding protein gene with multiple splicing
8	57499219	57499519	301	*	3.60135	4.36554	1.87202	2.41209	0.000569553	0.016925	Intron (ENSMUST00000180690/ENSMUSG00000096917, intron 2 of 2)	8	57505815	57506731	917	1	ENSMUSG00000096917	ENSMUST00000210752	-6296	78353	2500002B13Rik	RIKEN cDNA 2500002B13 gene
12	111678137	111678437	301	*	5.94576	5.53436	6.2655	-0.772098	0.000572107	0.0169692	Promoter (<=1kb)	12	111678116	111678908	793	1	ENSMUSG00000060950	ENSMUST00000222737	21	328162	Trmt61a	tRNA methyltransferase 61A
8	120588748	120589048	301	*	6.18384	6.52917	5.72894	0.756277	0.000572687	0.0169692	Promoter (<=1kb)	8	120578633	120588980	10348	2	ENSMUSG00000031821	ENSMUST00000146526	0	272551	Gins2	GINS complex subunit 2 (Psf2 homolog)
14	73238475	73238775	301	*	4.93951	4.32256	5.37028	-1.08548	0.000573221	0.0169692	5' UTR	14	73237895	73243294	5400	1	ENSMUSG00000033446	ENSMUST00000044405	580	67168	Lpar6	lysophosphatidic acid receptor 6
8	70511288	70511588	301	*	4.03001	4.62463	3.00062	1.56679	0.000583171	0.0172306	Promoter (<=1kb)	8	70508328	70510801	2474	2	ENSMUSG00000090137	ENSMUST00000135446	-487	22186	Uba52	ubiquitin A-52 residue ribosomal protein fusion product 1
11	95088640	95088940	301	*	2.77362	3.70182	0	4.01907	0.000583527	0.0172306	Distal Intergenic	11	95044474	95076801	32328	2	ENSMUSG00000001507	ENSMUST00000120375	-11839	16400	Itga3	integrin alpha 3
14	30950997	30951297	301	*	4.12932	4.71971	3.11292	1.55075	0.000585093	0.0172551	Promoter (<=1kb)	14	30951377	30988818	37442	1	ENSMUSG00000021918	ENSMUST00000226551	-80	23955	Nek4	NIMA (never in mitosis gene a)-related expressed kinase 4
8	85432304	85432604	301	*	6.0976	6.4549	5.62162	0.78918	0.000587376	0.0173006	Promoter (<=1kb)	8	85432686	85433315	630	1	ENSMUSG00000103341	ENSMUST00000194864	-82
8	105347565	105347865	301	*	6.24558	6.61115	5.75475	0.812387	0.000589083	0.0173162	Promoter (<=1kb)	8	105329163	105347909	18747	2	ENSMUSG00000014778	ENSMUST00000132777	44	234686	Fhod1	formin homology 2 domain containing 1
8	94037183	94037483	301	*	6.08143	6.42781	5.62468	0.759064	0.00058939	0.0173162	Promoter (<=1kb)	8	94037198	94067921	30724	1	ENSMUSG00000033009	ENSMUST00000109556	0	270086	Ogfod1	2-oxoglutarate and iron-dependent oxygenase domain containing 1
5	143122299	143122599	301	*	3.72133	4.41752	2.32455	2.02385	0.000595728	0.0174211	Distal Intergenic	5	142990893	143112994	122102	2	ENSMUSG00000045078	ENSMUST00000053498	-9305	108086	Rnf216	ring finger protein 216
13	113612960	113613260	301	*	3.93612	4.60305	2.65791	1.88224	0.000596302	0.0174211	Exon (ENSMUST00000223993/ENSMUSG00000042364, exon 1 of 2)	13	113592185	113613641	21457	2	ENSMUSG00000042364	ENSMUST00000223993	381	170625	Snx18	sorting nexin 18
11	95516258	95516558	301	*	2.55428	0	3.51269	-4.68854	0.000596584	0.0174211	Promoter (1-2kb)	11	95509845	95514570	4726	2	ENSMUSG00000046719	ENSMUST00000058866	-1688	104079	Nxph3	neurexophilin 3
11	6418572	6418872	301	*	4.74738	5.22352	4.03185	1.14314	0.000596836	0.0174211	Intron (ENSMUST00000132846/ENSMUSG00000071866, intron 3 of 4)	11	6416312	6419804	3493	1	ENSMUSG00000071866	ENSMUST00000213200	2260	268373	Ppia	peptidylprolyl isomerase A
4	133095090	133095390	301	*	4.86802	5.33519	4.17278	1.11451	0.000597379	0.0174211	Distal Intergenic	4	133066249	133072063	5815	1	ENSMUSG00000037692	ENSMUST00000148518	28841	230793	Ahdc1	AT hook, DNA binding motif, containing 1
11	93099300	93099600	301	*	4.13119	3.22329	4.6841	-1.49084	0.000597437	0.0174211	Promoter (<=1kb)	11	93099290	93601749	502460	1	ENSMUSG00000056158	ENSMUST00000107863	10	72605	Car10	carbonic anhydrase 10
8	124862938	124863238	301	*	6.55317	6.87563	6.13724	0.694836	0.000598286	0.0174242	Promoter (<=1kb)	8	124836945	124863014	26070	2	ENSMUSG00000031984	ENSMUST00000211971	0	66523	2810004N23Rik	RIKEN cDNA 2810004N23 gene
8	121083327	121083627	301	*	4.65355	5.14402	3.90476	1.19003	0.000602901	0.0175367	Promoter (<=1kb)	8	121059119	121083110	23992	2	ENSMUSG00000097336	ENSMUST00000182264	-217	68790	Fendrr	Foxf1 adjacent non-coding developmental regulatory RNA
4	152329451	152329751	301	*	3.91019	4.56799	2.66661	1.83873	0.000605674	0.0175954	Intron (ENSMUST00000142735/ENSMUSG00000028936, intron 2 of 3)	4	152327557	152332474	4918	1	ENSMUSG00000028936	ENSMUST00000156445	1894	19934	Rpl22	ribosomal protein L22
1	87228077	87228377	301	*	2.27042	3.27042	0	6.26812	0.00060699	0.0176118	3' UTR	1	87214286	87228064	13779	1	ENSMUSG00000026254	ENSMUST00000113231	13791	26987	Eif4e2	eukaryotic translation initiation factor 4E member 2
4	124710098	124710398	301	*	3.58575	2.22223	4.27404	-2.06487	0.000610629	0.0176954	Promoter (4-5kb)	4	124714776	124732460	17685	1	ENSMUSG00000028902	ENSMUST00000030734	-4378	75062	Sf3a3	splicing factor 3a, subunit 3
8	71951109	71951409	301	*	6.10789	6.44778	5.66241	0.741365	0.000612585	0.01773	Promoter (<=1kb)	8	71951091	71993792	42702	1	ENSMUSG00000052446	ENSMUST00000136878	18	234413	Zfp961	zinc finger protein 961
11	101771967	101772267	301	*	3.80249	4.49808	2.40828	2.02229	0.000617312	0.0178443	Promoter (<=1kb)	11	101770354	101772181	1828	2	ENSMUSG00000017724	ENSMUST00000132040	0	18612	Etv4	ets variant 4
16	91220150	91220450	301	*	3.4745	1.87697	4.21396	-2.34008	0.000618386	0.0178443	Distal Intergenic	16	91222100	91222926	827	2	ENSMUSG00000116882	ENSMUST00000231709	2476
19	23135747	23136047	301	*	5.04878	5.51036	4.36597	1.09723	0.000619226	0.0178443	Downstream (<=300bp)	19	23134900	23135717	818	1	ENSMUSG00000044387	ENSMUST00000142712	847
2	55436260	55436560	301	*	4.00349	3.0016	4.58908	-1.61476	0.000619605	0.0178443	5' UTR	2	55435970	55598145	162176	1	ENSMUSG00000026824	ENSMUST00000067101	290	16519	Kcnj3	potassium inwardly-rectifying channel, subfamily J, member 3
18	65604004	65604304	301	*	2.77657	3.70468	0	4.0174	0.000620873	0.0178443	Exon (ENSMUST00000195369/ENSMUSG00000103194, exon 1 of 1)	18	65603834	65605093	1260	1	ENSMUSG00000103194	ENSMUST00000195369	170
16	84777293	84777593	301	*	3.48258	4.22493	1.87042	2.27397	0.000621115	0.0178443	Intron (ENSMUST00000114195/ENSMUSG00000053062, intron 1 of 9)	16	84774386	84810996	36611	1	ENSMUSG00000053062	ENSMUST00000098407	2907	67374	Jam2	junction adhesion molecule 2
8	70659447	70659747	301	*	5.85338	6.22148	5.35794	0.81907	0.000622059	0.0178494	Promoter (<=1kb)	8	70646435	70659738	13304	2	ENSMUSG00000056204	ENSMUST00000070173	0	66522	Pgpep1	pyroglutamyl-peptidase I
8	121651933	121652233	301	*	5.74687	6.11729	5.24721	0.825456	0.000624071	0.0178678	5' UTR	8	121598703	121652901	54199	2	ENSMUSG00000061410	ENSMUST00000046386	668	142682	Zcchc14	zinc finger, CCHC domain containing 14
17	30598741	30599041	301	*	3.95448	4.58698	2.80166	1.72514	0.000624229	0.0178678	Promoter (1-2kb)	17	30592861	30597539	4679	2	ENSMUSG00000024026	ENSMUST00000235873	-1202	109801	Glo1	glyoxalase 1
8	46552150	46552450	301	*	6.10572	6.4499	5.65281	0.753057	0.000627236	0.0178986	Promoter (<=1kb)	8	46552087	46578368	26282	1	ENSMUSG00000031629	ENSMUST00000093518	63	71876	Cenpu	centromere protein U
8	123442988	123443288	301	*	6.07784	6.42184	5.62524	0.752545	0.000627365	0.0178986	Promoter (<=1kb)	8	123442996	123452822	9827	1	ENSMUSG00000001482	ENSMUST00000124741	0	23854	Def8	differentially expressed in FDCP 8
11	84764479	84764779	301	*	3.34586	1.41866	4.14251	-2.70948	0.000627603	0.0178986	Intron (ENSMUST00000155046/ENSMUSG00000087407, intron 2 of 2)	11	84763855	84777829	13975	2	ENSMUSG00000087407	ENSMUST00000155046	13050
9	57940147	57940447	301	*	6.22225	6.55873	5.78261	0.732241	0.000628669	0.0179071	Promoter (<=1kb)	9	57940113	57962865	22753	1	ENSMUSG00000038264	ENSMUST00000043059	34	20361	Sema7a	sema domain, immunoglobulin domain (Ig), and GPI membrane anchor, (semaphorin) 7A
8	111095120	111095420	301	*	4.61409	5.10097	3.87373	1.1779	0.000637138	0.0181262	Intron (ENSMUST00000135302/ENSMUSG00000033624, intron 1 of 3)	8	111094655	111135147	40493	1	ENSMUSG00000033624	ENSMUST00000144377	465	319518	Pdpr	pyruvate dehydrogenase phosphatase regulatory subunit
8	123848975	123849275	301	*	3.89127	4.56476	2.58752	1.91307	0.00063889	0.0181282	Promoter (4-5kb)	8	123853829	123854195	367	1	ENSMUSG00000083911	ENSMUST00000118982	-4554	100043296	Gm4342	predicted gene 4342
7	109986592	109986892	301	*	3.98226	4.60259	2.87064	1.67282	0.000639381	0.0181282	Promoter (<=1kb)	7	109973485	109986929	13445	2	ENSMUSG00000047554	ENSMUST00000118429	37	233724	Tmem41b	transmembrane protein 41B
8	120336038	120336338	301	*	4.65495	5.14549	3.90598	1.19028	0.000639918	0.0181282	Intron (ENSMUST00000127664/ENSMUSG00000092329, intron 1 of 15)	8	120443459	120443549	91	2	ENSMUSG00000080549	ENSMUST00000116899	107211
17	31732096	31732396	301	*	2.73374	3.65975	0	3.97525	0.000640313	0.0181282	Distal Intergenic	17	31688735	31690425	1691	2	ENSMUSG00000117656	ENSMUST00000237283	-41671
8	105965812	105966112	301	*	6.37164	6.6995	5.94665	0.709136	0.000643562	0.0181814	Promoter (<=1kb)	8	105943590	105966044	22455	2	ENSMUSG00000017765	ENSMUST00000116429	0	20498	Slc12a4	solute carrier family 12, member 4
11	89002642	89002942	301	*	3.40983	4.19155	1.57758	2.52321	0.000643746	0.0181814	Intron (ENSMUST00000100627/ENSMUSG00000000275, intron 1 of 4)	11	88999376	89020293	20918	1	ENSMUSG00000000275	ENSMUST00000107896	3266	217069	Trim25	tripartite motif-containing 25
19	23147425	23147725	301	*	3.14186	3.99967	0.728491	3.13698	0.000646822	0.0182342	Promoter (1-2kb)	19	23149431	23149551	121	1	ENSMUSG00000080626	ENSMUST00000116976	-1706	100316672	Mir1192	microRNA 1192
11	88696047	88696347	301	*	3.1983	4.03259	0.994199	2.92064	0.000647724	0.0182342	Intron (ENSMUST00000107909/ENSMUSG00000069769, intron 5 of 13)	11	88343889	88718101	374213	2	ENSMUSG00000069769	ENSMUST00000092794	21754	76626	Msi2	musashi RNA-binding protein 2
7	3221650	3221950	301	*	3.29498	4.11353	1.21405	2.7931	0.000647959	0.0182342	3' UTR	7	3220773	3220841	69	1	ENSMUSG00000077886	ENSMUST00000104694	877	100049713	Mir295	microRNA 295
15	82917390	82917690	301	*	3.14261	4.0005	0.728494	3.1378	0.000648869	0.0182378	Intron (ENSMUST00000229547/ENSMUSG00000041852, intron 1 of 1)	15	82808436	82912134	103699	2	ENSMUSG00000041852	ENSMUST00000048966	-5256	21411	Tcf20	transcription factor 20
8	33885603	33885903	301	*	4.14069	4.73502	3.11221	1.5667	0.000651656	0.0182941	Promoter (<=1kb)	8	33884774	33885747	974	2	ENSMUSG00000098166	ENSMUST00000182843	0
18	21653052	21653352	301	*	3.98836	3.00086	4.56913	-1.59565	0.000653004	0.01831	Exon (ENSMUST00000143378/ENSMUSG00000043168, exon 1 of 3)	18	21652563	21656105	3543	1	ENSMUSG00000043168	ENSMUST00000139804	489	74644	4930426D05Rik	RIKEN cDNA 4930426D05 gene
8	84687720	84688020	301	*	6.05828	6.40919	5.59363	0.771448	0.000657408	0.0184114	Promoter (<=1kb)	8	84670479	84687902	17424	2	ENSMUSG00000001910	ENSMUST00000001975	0	66830	Nacc1	nucleus accumbens associated 1, BEN and BTB (POZ) domain containing
17	56120436	56120736	301	*	4.89724	4.29681	5.31995	-1.06089	0.000658626	0.0184234	Exon (ENSMUST00000041357/ENSMUSG00000037095, exon 2 of 2)	17	56119678	56122001	2324	2	ENSMUSG00000037095	ENSMUST00000041357	1265	76905	Lrg1	leucine-rich alpha-2-glycoprotein 1
1	93207087	93207387	301	*	4.76598	5.23806	4.05969	1.13	0.000659513	0.0184261	Intron (ENSMUST00000138595/ENSMUSG00000084989, intron 20 of 31)	1	93235841	93301065	65225	1	ENSMUSG00000047793	ENSMUST00000062202	-28454	208777	Sned1	sushi, nidogen and EGF-like domains 1
8	84639406	84639706	301	*	4.15957	4.74034	3.17208	1.51291	0.000664652	0.0185297	Exon (ENSMUST00000238701/ENSMUSG00000034656, exon 49 of 49)	8	84638991	84639434	444	1	ENSMUSG00000034656	ENSMUST00000130507	415	12286	Cacna1a	calcium channel, voltage-dependent, P/Q type, alpha 1A subunit
5	122768974	122769274	301	*	2.87322	3.77149	0	3.57782	0.000665441	0.0185297	Intron (ENSMUST00000111668/ENSMUSG00000029471, intron 1 of 16)	5	122746443	122763865	17423	2	ENSMUSG00000029471	ENSMUST00000199179	-5109	207565	Camkk2	calcium/calmodulin-dependent protein kinase kinase 2, beta
11	77884939	77885239	301	*	4.04364	4.64317	2.99901	1.58683	0.000666192	0.0185297	Promoter (<=1kb)	11	77882619	77884544	1926	2	ENSMUSG00000017453	ENSMUST00000155401	-395	19193	Pipox	pipecolic acid oxidase
15	77036828	77037128	301	*	2.73173	3.65763	0	3.97314	0.000666392	0.0185297	Intron (ENSMUST00000166179/ENSMUSG00000018893, intron 1 of 3)	15	77044729	77056298	11570	1	ENSMUSG00000033576	ENSMUST00000142405	-7601	71939	Apol6	apolipoprotein L 6
11	69679547	69679847	301	*	4.59428	5.0876	3.83874	1.19929	0.00066858	0.0185684	Promoter (<=1kb)	11	69678157	69679195	1039	2	ENSMUSG00000005204	ENSMUST00000128355	-352	80886	Senp3	SUMO/sentrin specific peptidase 3
1	118650534	118650834	301	*	3.3709	4.14548	1.58158	2.47353	0.000672993	0.0186688	Intron (ENSMUST00000027629/ENSMUSG00000026380, intron 2 of 14)	1	118651482	118651795	314	2	ENSMUSG00000101624	ENSMUST00000185504	961
14	99348197	99348497	301	*	3.22063	4.02775	1.22231	2.69981	0.000678349	0.018795	Distal Intergenic	14	99352048	99352169	122	2	ENSMUSG00000084700	ENSMUST00000122751	3672	115488431	Gm22984	predicted gene, 22984
8	70088011	70088311	301	*	5.50202	5.8899	4.9699	0.874831	0.000679848	0.0188142	Exon (ENSMUST00000007738/ENSMUSG00000007594, exon 5 of 5)	8	70084144	70084887	744	1	ENSMUSG00000007594	ENSMUST00000213092	3867	330790	Hapln4	hyaluronan and proteoglycan link protein 4
12	86867763	86868063	301	*	4.29567	4.83877	3.41442	1.37156	0.00069736	0.0192343	Distal Intergenic	12	86880701	86884798	4098	2	ENSMUSG00000034168	ENSMUST00000038422	16735	238330	Irf2bpl	interferon regulatory factor 2 binding protein-like
7	118849593	118849893	301	*	3.14717	4.00356	0.747404	3.12227	0.000698043	0.0192343	Intron (ENSMUST00000116280/ENSMUSG00000030980, intron 3 of 4)	7	118845501	118855613	10113	2	ENSMUSG00000030980	ENSMUST00000106549	5720	66356	Knop1	lysine rich nucleolar protein 1
2	168951707	168952007	301	*	3.29478	4.0842	1.41442	2.57279	0.000698656	0.0192343	Exon (ENSMUST00000109162/ENSMUSG00000027551, exon 2 of 9)	2	168950575	168955266	4692	2	ENSMUSG00000027551	ENSMUST00000136242	3259	22722	Zfp64	zinc finger protein 64
16	20531264	20531564	301	*	3.27649	1.21287	4.09271	-2.85631	0.000698706	0.0192343	Promoter (3-4kb)	16	20535478	20544056	8579	1	ENSMUSG00000022841	ENSMUST00000090023	-3914	11773	Ap2m1	adaptor-related protein complex 2, mu 1 subunit
13	89539286	89539586	301	*	4.23601	3.36634	4.77478	-1.4399	0.000700546	0.0192343	Promoter (<=1kb)	13	89539796	89611652	71857	1	ENSMUSG00000021613	ENSMUST00000022108	-210	12950	Hapln1	hyaluronan and proteoglycan link protein 1
11	69965568	69965868	301	*	4.16943	3.32153	4.69991	-1.4096	0.000700604	0.0192343	5' UTR	11	69965396	69967885	2490	1	ENSMUSG00000018569	ENSMUST00000018713	172	53624	Cldn7	claudin 7
12	59068240	59068540	301	*	3.46185	4.1995	1.87346	2.24571	0.000700811	0.0192343	Exon (ENSMUST00000021381/ENSMUSG00000020994, exon 3 of 9)	12	59066964	59068691	1728	1	ENSMUSG00000020994	ENSMUST00000217676	1276	18949	Pnn	pinin
18	64265280	64265580	301	*	3.99913	3.00315	4.58275	-1.60691	0.000701687	0.0192343	Promoter (<=1kb)	18	64265986	64272240	6255	1	ENSMUSG00000056812	ENSMUST00000139622	-406	20451	St8sia3	ST8 alpha-N-acetyl-neuraminide alpha-2,8-sialyltransferase 3
1	63205100	63205400	301	*	3.14111	3.99811	0.735496	3.12855	0.00070244	0.0192343	Intron (ENSMUST00000141027/ENSMUSG00000086730, intron 1 of 1)	1	63200708	63207967	7260	1	ENSMUSG00000086730	ENSMUST00000189722	4392
8	43180740	43181040	301	*	4.89854	5.34568	4.24716	1.05109	0.000703936	0.0192527	Intron (ENSMUST00000209200/ENSMUSG00000091490, intron 1 of 7)	8	43180541	43193881	13341	1	ENSMUSG00000091490	ENSMUST00000210136	199	622117	Triml2	tripartite motif family-like 2
17	20945639	20945939	301	*	5.4922	5.89048	4.94018	0.905007	0.000708127	0.0193447	Intron (ENSMUST00000007708/ENSMUSG00000007564, intron 1 of 14)	17	20945487	20958784	13298	1	ENSMUSG00000007564	ENSMUST00000173658	152	51792	Ppp2r1a	protein phosphatase 2, regulatory subunit A, alpha
8	91133651	91133951	301	*	6.78116	7.10027	6.37082	0.686041	0.000710464	0.0193859	Promoter (<=1kb)	8	91129683	91133772	4090	2	ENSMUSG00000031667	ENSMUST00000209444	0	14339	Aktip	AKT interacting protein
7	126390615	126390915	301	*	3.18884	4.02177	0.995834	2.90827	0.000715095	0.0194895	Promoter (<=1kb)	7	126384877	126390557	5681	2	ENSMUSG00000030722	ENSMUST00000142947	-58	18020	Nfatc2ip	nuclear factor of activated T cells, cytoplasmic, calcineurin dependent 2 interacting protein
10	128095235	128095535	301	*	3.36612	4.14034	1.57894	2.47102	0.000716455	0.0195038	Promoter (<=1kb)	10	128096380	128119340	22961	1	ENSMUSG00000040054	ENSMUST00000219980	-845	116848	Baz2a	bromodomain adjacent to zinc finger domain, 2A
11	79016221	79016521	301	*	3.24811	4.05983	1.21718	2.73671	0.000720183	0.0195824	Exon (ENSMUST00000018478/ENSMUSG00000018334, exon 19 of 19)	11	79017036	79020410	3375	2	ENSMUSG00000018334	ENSMUST00000209031	3889	16706	Ksr1	kinase suppressor of ras 1
8	78139398	78139698	301	*	3.75625	4.41657	2.50325	1.84826	0.000727511	0.0197371	Distal Intergenic	8	78107960	78108110	151	1	ENSMUSG00000109948	ENSMUST00000210236	31438
2	74762971	74763271	301	*	5.66498	5.20946	6.01066	-0.84161	0.000727562	0.0197371	Promoter (<=1kb)	2	74762980	74765142	2163	1	ENSMUSG00000042448	ENSMUST00000047793	0	15429	Hoxd1	homeobox D1
17	23806579	23806879	301	*	4.24668	4.8072	3.31761	1.43585	0.000730105	0.0197801	Promoter (1-2kb)	17	23807918	23810006	2089	1	ENSMUSG00000039218	ENSMUST00000191385	-1039	75956	Srrm2	serine/arginine repetitive matrix 2
12	106010428	106010728	301	*	5.57775	5.01878	5.97962	-1.00061	0.000730839	0.0197801	Intron (ENSMUST00000072040/ENSMUSG00000021115, intron 1 of 12)	12	106010316	106075409	65094	1	ENSMUSG00000021115	ENSMUST00000021539	112	22367	Vrk1	vaccinia related kinase 1
9	40730784	40731084	301	*	3.89085	2.74212	4.52216	-1.80319	0.000734806	0.0198543	Intron (ENSMUST00000139577/ENSMUSG00000032024, intron 1 of 2)	9	40718906	40719986	1081	2	ENSMUSG00000086014	ENSMUST00000128235	-10798
15	92051382	92051682	301	*	4.8295	4.16672	5.28193	-1.15222	0.000735281	0.0198543	Intron (ENSMUST00000141187/ENSMUSG00000055022, intron 1 of 8)	15	92051165	92341967	290803	1	ENSMUSG00000055022	ENSMUST00000169825	217	12805	Cntn1	contactin 1
8	111933466	111933766	301	*	6.42304	6.75308	5.99438	0.71502	0.000737469	0.0198623	Promoter (<=1kb)	8	111912073	111933799	21727	2	ENSMUSG00000031951	ENSMUST00000211866	33	234740	Tmem231	transmembrane protein 231
8	111743564	111743864	301	*	6.66307	6.98039	6.25569	0.681232	0.000738051	0.0198623	Promoter (<=1kb)	8	111710474	111743809	33336	2	ENSMUSG00000031955	ENSMUST00000166232	0	12927	Bcar1	breast cancer anti-estrogen resistance 1
8	46163670	46163970	301	*	6.20324	6.54373	5.75673	0.743082	0.000738442	0.0198623	Promoter (<=1kb)	8	46163692	46170795	7104	1	ENSMUSG00000031631	ENSMUST00000145080	0	66756	Cfap97	cilia and flagella associated protein 97
15	100729361	100729661	301	*	4.70826	4.05707	5.1553	-1.13486	0.00073898	0.0198623	Promoter (<=1kb)	15	100691813	100729376	37564	2	ENSMUSG00000037280	ENSMUST00000159715	0	207839	Galnt6	polypeptide N-acetylgalactosaminyltransferase 6
8	88950319	88950619	301	*	4.01546	4.60603	2.99848	1.55042	0.00074885	0.0201045	Distal Intergenic	8	89024735	89024831	97	1	ENSMUSG00000099078	ENSMUST00000183771	-74116	102465899	Mir8110	microRNA 8110
17	31853500	31853800	301	*	2.88131	3.78017	0	3.58642	0.000754909	0.0202439	Promoter (1-2kb)	17	31849754	31851575	1822	2	ENSMUSG00000024042	ENSMUST00000234867	-1925	17691	Sik1	salt inducible kinase 1
4	152330599	152330899	301	*	3.14523	3.97245	0.997923	2.85731	0.000757995	0.0203033	Intron (ENSMUST00000142735/ENSMUSG00000028936, intron 3 of 3)	4	152327557	152332474	4918	1	ENSMUSG00000028936	ENSMUST00000156445	3042	19934	Rpl22	ribosomal protein L22
X	139998830	139999130	301	*	2.7357	3.66193	0	3.97973	0.00075929	0.0203147	Promoter (<=1kb)	20	139889511	139998595	109085	2	ENSMUSG00000031433	ENSMUST00000087400	-235	237073	Rbm41	RNA binding motif protein 41
7	133109240	133109540	301	*	3.68414	4.37268	2.31959	1.98418	0.00076268	0.0203821	Intron (ENSMUST00000124096/ENSMUSG00000030849, intron 1 of 6)	7	133025720	133111791	86072	2	ENSMUSG00000030970	ENSMUST00000155996	2251	13017	Ctbp2	C-terminal binding protein 2
8	84237395	84237695	301	*	5.19074	5.60598	4.60537	0.95449	0.00076778	0.0204764	Promoter (<=1kb)	8	84210678	84237055	26378	2	ENSMUSG00000035671	ENSMUST00000039480	-340	212168	Zswim4	zinc finger SWIM-type containing 4
6	100424536	100424836	301	*	3.72134	4.39414	2.42031	1.90703	0.000767964	0.0204764	Distal Intergenic	6	100494681	100494814	134	2	ENSMUSG00000087929	ENSMUST00000157304	69978	115486365	Gm23234	predicted gene, 23234
18	65832336	65832636	301	*	3.27562	4.06214	1.41364	2.55167	0.00077646	0.0206793	Distal Intergenic	18	65835474	65835744	271	2	ENSMUSG00000117866	ENSMUST00000237664	3108
2	179570178	179570478	301	*	3.25225	4.06344	1.22511	2.73248	0.000780324	0.0207586	Intron (ENSMUST00000000314/ENSMUSG00000000305, intron 2 of 15)	2	179612622	179613567	946	2	ENSMUSG00000083410	ENSMUST00000120800	43089
8	46617559	46617859	301	*	5.43941	5.84269	4.87768	0.919568	0.000786677	0.0208887	Intron (ENSMUST00000211115/ENSMUSG00000031628, intron 1 of 6)	8	46617442	46639566	22125	1	ENSMUSG00000031628	ENSMUST00000210534	117	12367	Casp3	caspase 3
8	121590564	121590864	301	*	6.7932	7.09885	6.40488	0.650617	0.000787004	0.0208887	Promoter (<=1kb)	8	121590712	121596995	6284	1	ENSMUSG00000031812	ENSMUST00000181521	0	67443	Map1lc3b	microtubule-associated protein 1 light chain 3 beta
11	19983226	19983526	301	*	4.31048	4.84303	3.45716	1.33358	0.000791266	0.0209741	Intron (ENSMUST00000093299/ENSMUSG00000045671, intron 1 of 6)	11	19954570	20018133	63564	1	ENSMUSG00000045671	ENSMUST00000123036	28656	114716	Spred2	sprouty-related EVH1 domain containing 2
8	84977589	84977889	301	*	6.28865	6.61501	5.8662	0.705039	0.000792917	0.0209741	Exon (ENSMUST00000064922/ENSMUSG00000052837, exon 1 of 1)	8	84976910	84978718	1809	2	ENSMUSG00000052837	ENSMUST00000064922	829	16477	Junb	jun B proto-oncogene
15	10714500	10714800	301	*	5.35223	5.75484	4.7918	0.917434	0.000793329	0.0209741	Promoter (<=1kb)	15	10568969	10714567	145599	2	ENSMUSG00000022246	ENSMUST00000169385	0	75646	Rai14	retinoic acid induced 14
8	119840260	119840560	301	*	6.09773	6.43601	5.655	0.737008	0.000794285	0.0209741	Promoter (<=1kb)	8	119809222	119840544	31323	2	ENSMUSG00000031827	ENSMUST00000034285	0	72042	Cotl1	coactosin-like 1 (Dictyostelium)
16	30388462	30388762	301	*	6.04519	6.38804	5.5946	0.749357	0.000794712	0.0209741	Promoter (<=1kb)	16	30312423	30388530	76108	2	ENSMUSG00000022533	ENSMUST00000061350	0	224088	Atp13a3	ATPase type 13A3
11	100145298	100145598	301	*	4.44342	3.66151	4.94769	-1.32012	0.000796741	0.0210039	Exon (ENSMUST00000007317/ENSMUSG00000020911, exon 1 of 6)	11	100140810	100146120	5311	2	ENSMUSG00000020911	ENSMUST00000007317	522	16669	Krt19	keratin 19
12	119238354	119238654	301	*	4.34326	3.54676	4.85346	-1.33982	0.000800399	0.0210766	5' UTR	12	119201463	119238770	37308	2	ENSMUSG00000025321	ENSMUST00000137804	116	320910	Itgb8	integrin beta 8
9	61912881	61913181	301	*	4.25965	4.80644	3.36845	1.38483	0.000805734	0.021171	Distal Intergenic	9	61913284	61914542	1259	2	ENSMUSG00000007892	ENSMUST00000008036	1361	56040	Rplp1	ribosomal protein, large, P1
8	79055757	79056057	301	*	3.2925	4.0814	1.41549	2.56894	0.000805799	0.021171	Intron (ENSMUST00000087927/ENSMUSG00000071064, intron 1 of 2)	8	79028587	79190856	162270	1	ENSMUSG00000071064	ENSMUST00000238669	27170	622675	Zfp827	zinc finger protein 827
11	84871067	84871367	301	*	4.57647	5.08873	3.77488	1.26369	0.000808936	0.0212296	Promoter (<=1kb)	11	84832361	84870817	38457	2	ENSMUSG00000020530	ENSMUST00000168434	-250	217039	Ggnbp2	gametogenetin binding protein 2
16	10170292	10170592	301	*	4.18254	4.7724	3.16773	1.54914	0.000810347	0.0212427	Promoter (<=1kb)	16	10170228	10174911	4684	1	ENSMUSG00000039209	ENSMUST00000044103	64	68172	Rpl39l	ribosomal protein L39-like
7	46100429	46100729	301	*	4.26226	3.46125	4.77429	-1.34557	0.000816726	0.0213351	Promoter (<=1kb)	7	46099420	46100658	1239	2	ENSMUSG00000096146	ENSMUST00000209291	0	16514	Kcnj11	potassium inwardly rectifying channel, subfamily J, member 11
16	38547394	38547694	301	*	3.41407	4.16935	1.73389	2.35062	0.000816761	0.0213351	Intron (ENSMUST00000036210/ENSMUSG00000034064, intron 3 of 10)	16	38525140	38550222	25083	2	ENSMUSG00000034064	ENSMUST00000153187	2528	224143	Poglut1	protein O-glucosyltransferase 1
4	150119783	150120083	301	*	2.96707	3.83912	0.408451	3.2732	0.000817092	0.0213351	5' UTR	4	150119283	150144169	24887	1	ENSMUSG00000028976	ENSMUST00000030826	500	56485	Slc2a5	solute carrier family 2 (facilitated glucose transporter), member 5
2	174291547	174291847	301	*	3.75512	4.41575	2.50095	1.84972	0.000817523	0.0213351	Promoter (3-4kb)	2	174295071	174295192	122	1	ENSMUSG00000098535	ENSMUST00000184327	-3224
8	9770520	9770820	301	*	3.41862	1.59061	4.19964	-2.6016	0.000822728	0.0214289	Promoter (<=1kb)	8	9770728	9770880	153	2	ENSMUSG00000105098	ENSMUST00000196300	60
8	71537123	71537423	301	*	5.63892	6.01508	5.12869	0.841564	0.00082436	0.0214289	Promoter (<=1kb)	8	71535805	71537331	1527	2	ENSMUSG00000046718	ENSMUST00000212386	0	69550	Bst2	bone marrow stromal cell antigen 2
19	23074179	23074479	301	*	3.51893	4.2426	1.99868	2.1672	0.000825691	0.0214289	Intron (ENSMUST00000236056/ENSMUSG00000097930, intron 1 of 1)	19	23037390	23075853	38464	2	ENSMUSG00000097930	ENSMUST00000181623	1374
8	107424666	107424966	301	*	6.83074	7.13321	6.44756	0.642327	0.000826046	0.0214289	Promoter (<=1kb)	8	107416238	107424986	8749	2	ENSMUSG00000003848	ENSMUST00000163757	20	67619	Nob1	NIN1/RPN12 binding protein 1 homolog
8	106011050	106011350	301	*	6.89089	7.20349	6.49127	0.668894	0.000826545	0.0214289	Promoter (<=1kb)	8	106011507	106053819	42313	1	ENSMUSG00000031901	ENSMUST00000034375	-157	66369	Dus2	dihydrouridine synthase 2
16	45844063	45844363	301	*	4.79802	4.19593	5.22154	-1.063	0.000826623	0.0214289	Promoter (<=1kb)	16	45746394	45844234	97841	2	ENSMUSG00000033149	ENSMUST00000076333	0	208177	Phldb2	pleckstrin homology like domain, family B, member 2
8	109705615	109705915	301	*	6.1431	6.48152	5.70015	0.737411	0.000829559	0.0214812	Promoter (<=1kb)	8	109705620	109724589	18970	1	ENSMUSG00000031728	ENSMUST00000212192	0	75871	Zfp821	zinc finger protein 821
12	109067671	109067971	301	*	4.65083	3.97038	5.11134	-1.17704	0.000835131	0.0216015	Intron (ENSMUST00000190647/ENSMUSG00000040867, intron 1 of 6)	12	109032187	109068217	36031	2	ENSMUSG00000040867	ENSMUST00000190647	246	380785	Begain	brain-enriched guanylate kinase-associated
8	121665471	121665771	301	*	3.31641	4.1092	1.41443	2.59758	0.000837365	0.0216353	Intron (ENSMUST00000127664/ENSMUSG00000092329, intron 1 of 15)	8	121666628	121666706	79	2	ENSMUSG00000064642	ENSMUST00000082708	935
6	34191795	34192095	301	*	3.50545	4.22637	1.9981	2.15166	0.000840777	0.0216939	Distal Intergenic	6	34179232	34186392	7161	1	ENSMUSG00000087613	ENSMUST00000145644	12563
7	4702500	4702800	301	*	2.87405	3.77267	0	3.58284	0.000842458	0.0216939	Intron (ENSMUST00000120836/ENSMUSG00000035390, intron 8 of 19)	7	4708978	4710992	2015	1	ENSMUSG00000035390	ENSMUST00000123637	-6178	381979	Brsk1	BR serine/threonine kinase 1
13	68581947	68582247	301	*	4.8005	5.27376	4.09154	1.13395	0.000843256	0.0216939	Promoter (<=1kb)	13	68582234	68583811	1578	1	ENSMUSG00000021532	ENSMUST00000222660	0	69577	Fastkd3	FAST kinase domains 3
9	22388698	22388998	301	*	6.38756	6.71497	5.96333	0.707951	0.000843345	0.0216939	5' UTR	9	22332012	22389188	57177	2	ENSMUSG00000036777	ENSMUST00000040912	190	68743	Anln	anillin, actin binding protein
11	70214468	70214768	301	*	4.12915	3.27413	4.66235	-1.41901	0.000846364	0.0217475	Promoter (<=1kb)	11	70214562	70215480	919	1	ENSMUSG00000040938	ENSMUST00000131468	0	216867	Slc16a11	solute carrier family 16 (monocarboxylic acid transporters), member 11
7	34387310	34387610	301	*	2.69567	3.61965	0	3.93564	0.000852859	0.0218717	Promoter (1-2kb)	7	34388665	34394779	6115	1	ENSMUSG00000086184	ENSMUST00000145961	-1055
2	154427767	154428067	301	*	4.56491	5.04434	3.84186	1.15309	0.000853067	0.0218717	Distal Intergenic	2	154436481	154539356	102876	1	ENSMUSG00000038533	ENSMUST00000109725	-8414	12396	Cbfa2t2	CBFA2/RUNX1 translocation partner 2
8	128685846	128686146	301	*	6.54485	6.86335	6.1355	0.684306	0.000856995	0.0219483	Promoter (<=1kb)	8	128685870	128710660	24791	1	ENSMUSG00000025809	ENSMUST00000135281	0	16412	Itgb1	integrin beta 1 (fibronectin receptor beta)
19	44670629	44670929	301	*	3.70035	2.32388	4.39175	-2.08277	0.000860533	0.0219985	Distal Intergenic	19	44692357	44695275	2919	2	ENSMUSG00000097683	ENSMUST00000181365	24346	102639186	Gm26644	predicted gene, 26644
14	121505092	121505392	301	*	4.55398	5.0446	3.80483	1.19007	0.000861655	0.0219985	Promoter (<=1kb)	14	121459621	121505252	45632	2	ENSMUSG00000025557	ENSMUST00000088386	0	56643	Slc15a1	solute carrier family 15 (oligopeptide transporter), member 1
11	97916352	97916652	301	*	3.41758	4.19979	1.58226	2.52679	0.000861779	0.0219985	Distal Intergenic	11	97941671	97941740	70	2	ENSMUSG00000093013	ENSMUST00000175272	25088
8	95331853	95332153	301	*	6.22541	6.55486	5.79774	0.713283	0.000863418	0.0220162	Promoter (<=1kb)	8	95323011	95331950	8940	2	ENSMUSG00000046556	ENSMUST00000057717	0	79233	Zfp319	zinc finger protein 319
9	114543191	114543491	301	*	2.69601	3.61979	0	3.93173	0.000865326	0.0220408	Intron (ENSMUST00000111816/ENSMUSG00000079259, intron 1 of 3)	9	114507133	114564369	57237	2	ENSMUSG00000079259	ENSMUST00000111816	20878	636931	Trim71	tripartite motif-containing 71
8	120488979	120489279	301	*	5.78206	6.13746	5.30946	0.783539	0.000887264	0.0225731	5' UTR	8	120488447	120581390	92944	1	ENSMUSG00000031822	ENSMUST00000034279	532	382034	Gse1	genetic suppressor element 1, coiled-coil protein
8	105605119	105605419	301	*	5.59946	5.97567	5.08916	0.841602	0.000888157	0.0225731	Promoter (<=1kb)	8	105605255	105622219	16965	1	ENSMUSG00000038604	ENSMUST00000043531	0	75687	Ripor1	RHO family interacting cell polarization regulator 1
8	105758260	105758560	301	*	6.6837	6.99493	6.28631	0.665186	0.00089009	0.0225976	Promoter (<=1kb)	8	105727101	105758596	31496	2	ENSMUSG00000013150	ENSMUST00000135959	36	70575	Gfod2	glucose-fructose oxidoreductase domain containing 2
7	49779170	49779470	301	*	4.01035	4.63833	2.87302	1.706	0.000892448	0.0226329	Promoter (<=1kb)	7	49779876	49787344	7469	1	ENSMUSG00000030505	ENSMUST00000146052	-406	71974	Prmt3	protein arginine N-methyltransferase 3
8	43183030	43183330	301	*	3.39158	4.14149	1.7401	2.31682	0.000897921	0.022747	Promoter (<=1kb)	8	43183119	43193881	10763	1	ENSMUSG00000091490	ENSMUST00000163869	0	622117	Triml2	tripartite motif family-like 2
6	142987754	142988054	301	*	3.68262	4.34675	2.41513	1.86507	0.000899948	0.0227737	Promoter (1-2kb)	6	142989610	142989996	387	1	ENSMUSG00000107839	ENSMUST00000203259	-1556
12	111537504	111537804	301	*	5.80193	5.36752	6.13536	-0.808533	0.000904462	0.0228631	Promoter (<=1kb)	12	111538016	111546752	8737	1	ENSMUSG00000021282	ENSMUST00000166123	-212	217869	Eif5	eukaryotic translation initiation factor 5
2	169006278	169006578	301	*	6.2241	6.55669	5.79112	0.721718	0.000910862	0.023	Distal Intergenic	2	169020025	169021385	1361	1	ENSMUSG00000052368	ENSMUST00000180562	-13447
17	53559553	53559853	301	*	2.50386	3.46095	0	4.56989	0.000911914	0.0230017	Distal Intergenic	17	53566861	53624491	57631	1	ENSMUSG00000000708	ENSMUST00000163648	-7008	18519	Kat2b	K(lysine) acetyltransferase 2B
9	40806936	40807236	301	*	2.17467	3.17467	0	6.17367	0.000914687	0.0230468	Intron (ENSMUST00000215526/ENSMUSG00000015656, intron 1 of 1)	9	40804748	40804837	90	1	ENSMUSG00000064791	ENSMUST00000082857	2188
6	84094558	84094858	301	*	3.50156	2.11596	4.19512	-2.08981	0.000924198	0.0232613	Exon (ENSMUST00000137673/ENSMUSG00000087001, exon 4 of 4)	6	84105373	84112199	6827	1	ENSMUSG00000033788	ENSMUST00000127459	-10515	26903	Dysf	dysferlin
15	34437849	34438149	301	*	2.17623	3.17623	0	6.17521	0.000929274	0.0233394	Distal Intergenic	15	34440791	34440922	132	2	ENSMUSG00000065899	ENSMUST00000083965	2773	115488553	Gm24523	predicted gene, 24523
17	23549100	23549400	301	*	4.68365	4.0306	5.13156	-1.13746	0.0009293	0.0233394	Promoter (1-2kb)	17	23550799	23565291	14493	1	ENSMUSG00000117322	ENSMUST00000233076	-1399	320020	6330415G19Rik	RIKEN cDNA 6330415G19 gene
5	110468071	110468371	301	*	2.16554	3.16554	0	6.16464	0.0009313	0.0233567	Distal Intergenic	5	110480755	110482201	1447	2	ENSMUSG00000105603	ENSMUST00000199828	13830	102635734	Gm32996	predicted gene, 32996
18	38636916	38637216	301	*	4.04468	4.62549	3.05708	1.51205	0.000932817	0.0233567	Intron (ENSMUST00000145090/ENSMUSG00000118257, intron 2 of 2)	18	38627287	38642930	15644	1	ENSMUSG00000118257	ENSMUST00000149112	9629
12	119946068	119946368	301	*	3.22007	1.22579	4.02661	-2.77795	0.000932986	0.0233567	Promoter (<=1kb)	12	119946410	120018813	72404	1	ENSMUSG00000048004	ENSMUST00000183694	-42	217951	Tmem196	transmembrane protein 196
2	76807000	76807300	301	*	3.80636	4.45975	2.57915	1.81695	0.000940851	0.0235283	Exon (ENSMUST00000011934/ENSMUSG00000051747, exon 68 of 191)	2	76821131	76826542	5412	2	ENSMUSG00000051747	ENSMUST00000142251	19242	22138	Ttn	titin
12	110417570	110417870	301	*	3.89024	2.59076	4.56264	-1.99182	0.000946278	0.0236387	Distal Intergenic	12	110447120	110450999	3880	1	ENSMUSG00000017843	ENSMUST00000222276	-29250	26931	Ppp2r5c	protein phosphatase 2, regulatory subunit B', gamma
2	163033529	163033829	301	*	3.75677	4.41739	2.50263	1.8497	0.000948299	0.0236639	Intron (ENSMUST00000018002/ENSMUSG00000017858, intron 9 of 12)	2	163022443	163028429	5987	1	ENSMUSG00000017858	ENSMUST00000152201	11086	245866	Ift52	intraflagellar transport 52
14	25661198	25661498	301	*	4.9161	5.35841	4.27499	1.03612	0.000953919	0.0237788	Exon (ENSMUST00000162645/ENSMUSG00000007817, exon 23 of 24)	14	25656830	25658405	1576	1	ENSMUSG00000007817	ENSMUST00000162546	4368	328365	Zmiz1	zinc finger, MIZ-type containing 1
10	108296275	108296575	301	*	3.43934	4.1982	1.73962	2.37362	0.000958387	0.0238398	Distal Intergenic	10	108268570	108284475	15906	1	ENSMUSG00000019907	ENSMUST00000219559	27705	17931	Ppp1r12a	protein phosphatase 1, regulatory subunit 12A
18	38631265	38631565	301	*	3.02445	3.86833	0.739053	2.99634	0.000959419	0.0238398	Intron (ENSMUST00000145090/ENSMUSG00000118257, intron 2 of 2)	18	38627287	38642930	15644	1	ENSMUSG00000118257	ENSMUST00000149112	3978
1	189727641	189727941	301	*	5.13918	5.57804	4.50536	1.02611	0.000960084	0.0238398	Promoter (<=1kb)	1	189728268	189876695	148428	1	ENSMUSG00000026604	ENSMUST00000097442	-327	19250	Ptpn14	protein tyrosine phosphatase, non-receptor type 14
17	70818056	70818356	301	*	4.98238	5.45825	4.26745	1.14319	0.000960769	0.0238398	3' UTR	17	70809072	70819401	10330	1	ENSMUSG00000003279	ENSMUST00000233780	8984	224997	Dlgap1	DLG associated protein 1
4	74261579	74261879	301	*	3.25114	4.06129	1.23141	2.72415	0.000961473	0.0238398	Promoter (<=1kb)	4	74262809	74331560	68752	1	ENSMUSG00000028397	ENSMUST00000156065	-930	76804	Kdm4c	lysine (K)-specific demethylase 4C
8	70510124	70510424	301	*	6.84229	7.14836	6.4533	0.65173	0.000964091	0.0238681	Promoter (<=1kb)	8	70508263	70510350	2088	2	ENSMUSG00000090137	ENSMUST00000140679	0	22186	Uba52	ubiquitin A-52 residue ribosomal protein fusion product 1
2	147187677	147187977	301	*	3.39409	1.87569	4.11737	-2.24543	0.000965063	0.0238681	Exon (ENSMUST00000144411/ENSMUSG00000053545, exon 2 of 3)	2	147187424	147188407	984	1	ENSMUSG00000053545	ENSMUST00000144411	253	78068	6430503K07Rik	RIKEN cDNA 6430503K07 gene
8	85060175	85060475	301	*	6.6222	6.92753	6.2344	0.649685	0.00096568	0.0238681	Promoter (<=1kb)	8	85053160	85060460	7301	2	ENSMUSG00000087026	ENSMUST00000125244	0	320466	A230103J11Rik	RIKEN cDNA A230103J11 gene
10	81559555	81559855	301	*	5.47504	5.85805	4.95209	0.860794	0.00096727	0.0238822	Promoter (<=1kb)	10	81559494	81566362	6869	1	ENSMUSG00000054452	ENSMUST00000002518	61	14797	Tle5	TLE family member 5, transcriptional modulator
8	124020602	124020902	301	*	6.47287	6.78555	6.07311	0.668869	0.000971591	0.0239635	Promoter (<=1kb)	8	124003266	124020940	17675	2	ENSMUSG00000038697	ENSMUST00000212010	38	102162	Taf5l	TATA-box binding protein associated factor 5 like
7	126928952	126929252	301	*	6.28543	6.62071	5.84786	0.729042	0.000975735	0.0240403	Promoter (<=1kb)	7	126928879	126945631	16753	1	ENSMUSG00000030685	ENSMUST00000032924	73	233877	Kctd13	potassium channel tetramerisation domain containing 13
14	76518369	76518669	301	*	3.301	4.09073	1.4187	2.57506	0.000978395	0.0240805	Distal Intergenic	14	76526592	76530616	4025	1	ENSMUSG00000115092	ENSMUST00000228107	-7923
4	135578915	135579215	301	*	4.52386	5.01477	3.77402	1.19087	0.000981402	0.0241284	Promoter (4-5kb)	4	135583748	135583848	101	1	ENSMUSG00000088179	ENSMUST00000157554	-4533
5	64812462	64812762	301	*	4.91756	5.39462	4.19991	1.14682	0.000982669	0.0241284	Promoter (<=1kb)	5	64812384	64822243	9860	1	ENSMUSG00000029178	ENSMUST00000197879	78	16599	Klf3	Kruppel-like factor 3 (basic)
12	110695840	110696140	301	*	6.49295	6.15056	6.76946	-0.660548	0.000984371	0.0241284	Promoter (<=1kb)	12	110695286	110695951	666	2	ENSMUSG00000021270	ENSMUST00000149189	0	15519	Hsp90aa1	heat shock protein 90, alpha (cytosolic), class A member 1
8	125734301	125734601	301	*	5.47596	5.85901	4.9529	0.860953	0.000985334	0.0241284	Promoter (<=1kb)	8	125734238	125739179	4942	1	ENSMUSG00000031851	ENSMUST00000065135	63	66566	Ntpcr	nucleoside-triphosphatase, cancer-related
1	36269425	36269725	301	*	4.79978	4.19807	5.22311	-1.06244	0.000986106	0.0241284	Exon (ENSMUST00000056946/ENSMUSG00000047180, exon 2 of 4)	1	36264597	36273435	8839	2	ENSMUSG00000047180	ENSMUST00000056946	3710	214854	Neurl3	neuralized E3 ubiquitin protein ligase 3
10	42632963	42633263	301	*	2.18275	0	3.18275	-6.22367	0.000986542	0.0241284	Intron (ENSMUST00000105497/ENSMUSG00000038280, intron 2 of 5)	10	42678916	42702459	23544	1	ENSMUSG00000038280	ENSMUST00000040718	-45653	14628	Ostm1	osteopetrosis associated transmembrane protein 1
17	6827496	6827796	301	*	4.99912	5.4369	4.36757	1.02238	0.000991136	0.0242155	Distal Intergenic	17	6808509	6818529	10021	1	ENSMUSG00000116644	ENSMUST00000231816	18987
15	73423012	73423312	301	*	5.41982	5.80711	4.88881	0.872985	0.000993989	0.0242598	Promoter (<=1kb)	15	73205102	73423128	218027	2	ENSMUSG00000022607	ENSMUST00000226988	0	14083	Ptk2	PTK2 protein tyrosine kinase 2
7	19796541	19796841	301	*	5.22897	4.69747	5.61651	-0.958222	0.00099633	0.0242915	Promoter (<=1kb)	7	19779718	19796793	17076	2	ENSMUSG00000040525	ENSMUST00000108449	0	80794	Cblc	Casitas B-lineage lymphoma c
X	167382104	167382404	301	*	4.80921	5.26327	4.14287	1.07255	0.000998375	0.024316	Intron (ENSMUST00000026839/ENSMUSG00000025742, intron 1 of 6)	20	167372409	167382710	10302	2	ENSMUSG00000025742	ENSMUST00000145456	306	110639	Prps2	phosphoribosyl pyrophosphate synthetase 2
3	88276416	88276716	301	*	4.19744	4.75621	3.27328	1.42883	0.00100204	0.0243799	Intron (ENSMUST00000165196/ENSMUSG00000103766, intron 1 of 9)	3	88284607	88284753	147	2	ENSMUSG00000103574	ENSMUST00000195161	8037
4	150236560	150236860	301	*	4.73752	5.19687	4.05962	1.08902	0.00100372	0.0243953	Promoter (<=1kb)	4	150236721	150244289	7569	1	ENSMUSG00000063524	ENSMUST00000150175	0	13806	Eno1	enolase 1, alpha non-neuron
8	83900492	83900792	301	*	5.75574	6.1166	5.27338	0.798681	0.00100538	0.0244101	Promoter (<=1kb)	8	83900573	83940011	39439	1	ENSMUSG00000013033	ENSMUST00000124355	0	330814	Adgrl1	adhesion G protein-coupled receptor L1
2	180731941	180732241	301	*	3.60398	4.29534	2.22763	1.99687	0.0010096	0.0244872	Promoter (4-5kb)	2	180736418	180741338	4921	1	ENSMUSG00000023393	ENSMUST00000154882	-4177	228993	Slc17a9	solute carrier family 17, member 9
8	121829219	121829519	301	*	6.78693	7.09296	6.398	0.651603	0.00101287	0.0245411	Promoter (<=1kb)	8	121796547	121829480	32934	2	ENSMUSG00000040263	ENSMUST00000174192	0	234825	Klhdc4	kelch domain containing 4
8	70820539	70820839	301	*	4.38266	4.90742	3.54953	1.30625	0.00101397	0.0245423	3' UTR	8	70813216	70813923	708	1	ENSMUSG00000000791	ENSMUST00000212826	7323	16161	Il12rb1	interleukin 12 receptor, beta 1
5	123158650	123158950	301	*	3.19485	4.02821	0.998393	2.91216	0.00101748	0.0246016	Promoter (3-4kb)	5	123162709	123165162	2454	1	ENSMUSG00000038384	ENSMUST00000173221	-3759	208043	Setd1b	SET domain containing 1B
7	45759377	45759677	301	*	3.35045	1.59064	4.11997	-2.52245	0.00102136	0.02467	Promoter (<=1kb)	7	45729983	45759612	29630	2	ENSMUSG00000003271	ENSMUST00000075571	0	54200	Sult2b1	sulfotransferase family, cytosolic, 2B, member 1
15	25781355	25781655	301	*	4.51285	4.99876	3.77475	1.17419	0.00102539	0.0247419	Exon (ENSMUST00000110457/ENSMUSG00000022272, exon 25 of 41)	15	25780190	25781368	1179	1	ENSMUSG00000022272	ENSMUST00000145587	1165	17909	Myo10	myosin X
17	45457056	45457356	301	*	3.64316	4.32105	2.32197	1.93051	0.00102738	0.0247599	Exon (ENSMUST00000233323/ENSMUSG00000023935, exon 3 of 6)	17	45465788	45466270	483	1	ENSMUSG00000061242	ENSMUST00000095268	-8432	668319	Gm9104	ribosomal protein L21 pseudogene
2	146045497	146045797	301	*	2.6675	0	3.58956	-3.97723	0.0010285	0.0247599	Promoter (<=1kb)	2	146045458	146129096	83639	1	ENSMUSG00000037143	ENSMUST00000125223	39	78774	Cfap61	cilia and flagella associated protein 61
3	133515105	133515405	301	*	3.08708	3.93834	0.735424	3.06934	0.00102932	0.0247599	Intron (ENSMUST00000098603/ENSMUSG00000040943, intron 1 of 10)	3	133538762	133544286	5525	2	ENSMUSG00000040943	ENSMUST00000195913	28881	214133	Tet2	tet methylcytosine dioxygenase 2
17	65877038	65877338	301	*	2.94274	3.81147	0.419539	3.23496	0.0010321	0.0248012	Intron (ENSMUST00000024905/ENSMUSG00000024096, intron 1 of 9)	17	65867532	65883940	16409	2	ENSMUSG00000024096	ENSMUST00000232885	6602	19765	Ralbp1	ralA binding protein 1
8	69121777	69122077	301	*	4.1578	4.73629	3.17706	1.50391	0.00103513	0.0248484	Distal Intergenic	8	69103128	69108340	5213	1	ENSMUSG00000006273	ENSMUST00000129797	18649	11966	Atp6v1b2	ATPase, H+ transporting, lysosomal V1 subunit B2
17	31655817	31656117	301	*	3.32301	4.11785	1.40772	2.61281	0.00103985	0.024936	Intron (ENSMUST00000166526/ENSMUSG00000061613, intron 1 of 7)	17	31648312	31656490	8179	2	ENSMUSG00000061613	ENSMUST00000236260	373	108121	U2af1	U2 small nuclear ribonucleoprotein auxiliary factor (U2AF) 1
14	61037573	61037873	301	*	4.57755	5.06198	3.84289	1.16964	0.00104175	0.0249561	Promoter (<=1kb)	14	60974522	61037891	63370	2	ENSMUSG00000060548	ENSMUST00000225730	18	29820	Tnfrsf19	tumor necrosis factor receptor superfamily, member 19
8	89014249	89014549	301	*	4.18283	4.73594	3.27439	1.40755	0.00104445	0.0249952	Distal Intergenic	8	89024735	89024831	97	1	ENSMUSG00000099078	ENSMUST00000183771	-10186	102465899	Mir8110	microRNA 8110
8	105900584	105900884	301	*	6.88014	7.18182	6.49824	0.640275	0.00104678	0.0250031	Intron (ENSMUST00000049699/ENSMUSG00000048310, intron 1 of 2)	8	105900441	105931778	31338	1	ENSMUSG00000048310	ENSMUST00000049699	143	244631	Pskh1	protein serine kinase H1
3	146812660	146812960	301	*	6.38144	6.70167	5.96923	0.688776	0.00104692	0.0250031	Promoter (<=1kb)	3	146729574	146812960	83387	2	ENSMUSG00000005034	ENSMUST00000102515	0	18749	Prkacb	protein kinase, cAMP dependent, catalytic, beta
2	152189427	152189727	301	*	4.67178	5.14216	3.96932	1.12412	0.00105566	0.025186	Promoter (3-4kb)	2	152185291	152185682	392	2	ENSMUSG00000081087	ENSMUST00000117430	-3745	100043843	Rps15a-ps7	ribosomal protein S15A, pseudogene 7
8	70131373	70131673	301	*	6.41859	6.74623	5.99398	0.70858	0.00105695	0.0251872	Promoter (<=1kb)	8	70131347	70133749	2403	1	ENSMUSG00000071078	ENSMUST00000212851	26	75692	Nr2c2ap	nuclear receptor 2C2-associated protein
7	37569170	37569470	301	*	3.58546	4.27428	2.21973	1.98378	0.00105787	0.0251872	Promoter (<=1kb)	7	37318024	37568390	250367	2	ENSMUSG00000043456	ENSMUST00000206763	-780	243937	Zfp536	zinc finger protein 536
4	141596861	141597161	301	*	3.52258	2.11851	4.22048	-2.11246	0.00106703	0.0253794	Promoter (<=1kb)	4	141590050	141596469	6420	2	ENSMUSG00000006219	ENSMUST00000137491	-392	74202	Fblim1	filamin binding LIM protein 1
11	87748435	87748735	301	*	2.66658	3.5886	0	3.89842	0.00107112	0.0254025	Distal Intergenic	11	87755577	87757270	1694	1	ENSMUSG00000084796	ENSMUST00000123700	-6842
15	79845941	79846241	301	*	3.43573	4.19604	1.72803	2.38293	0.00107122	0.0254025	Exon (ENSMUST00000230701/ENSMUSG00000115971, exon 2 of 2)	15	79843163	79846763	3601	1	ENSMUSG00000115971	ENSMUST00000230701	2778
8	124520819	124521119	301	*	6.18706	6.51336	5.7647	0.704799	0.00107126	0.0254025	Promoter (<=1kb)	8	124520819	124529903	9085	1	ENSMUSG00000031979	ENSMUST00000176279	0	76332	Cog2	component of oligomeric golgi complex 2
15	99470609	99470909	301	*	4.13014	4.70229	3.16788	1.47922	0.00107361	0.0254325	Exon (ENSMUST00000040313/ENSMUSG00000037525, exon 2 of 2)	15	99470081	99474708	4628	2	ENSMUSG00000037525	ENSMUST00000229827	3799	75284	Bcdin3d	BCDIN3 domain containing
8	90955303	90955603	301	*	4.41351	4.95319	3.5414	1.35994	0.00107527	0.0254458	Promoter (<=1kb)	8	90955435	90990632	35198	1	ENSMUSG00000056608	ENSMUST00000209341	0	109151	Chd9	chromodomain helicase DNA binding protein 9
4	132274320	132274620	301	*	5.74995	6.1088	5.2712	0.793065	0.00107969	0.0254739	Promoter (<=1kb)	4	132274375	132295766	21392	1	ENSMUSG00000028899	ENSMUST00000030731	0	66464	Taf12	TATA-box binding protein associated factor 12
8	61224249	61224549	301	*	6.6161	6.9381	6.20095	0.693638	0.00108004	0.0254739	Promoter (<=1kb)	8	61224244	61386641	162398	1	ENSMUSG00000031642	ENSMUST00000209611	5	59009	Sh3rf1	SH3 domain containing ring finger 1
8	60993286	60993586	301	*	6.54206	6.85057	6.14911	0.657951	0.00108071	0.0254739	Promoter (<=1kb)	8	60993265	61130908	137644	1	ENSMUSG00000031644	ENSMUST00000211672	21	18004	Nek1	NIMA (never in mitosis gene a)-related expressed kinase 1
8	107056288	107056588	301	*	7.18457	7.46996	6.82844	0.598396	0.00108082	0.0254739	Promoter (<=1kb)	8	107052908	107056498	3591	2	ENSMUSG00000031916	ENSMUST00000134772	0	97484	Cog8	component of oligomeric golgi complex 8
8	119515382	119515682	301	*	3.82315	4.45731	2.66459	1.73065	0.00108366	0.0255109	Promoter (<=1kb)	8	119513650	119515655	2006	2	ENSMUSG00000031835	ENSMUST00000212082	0	56453	Mbtps1	membrane-bound transcription factor peptidase, site 1
11	33158359	33158659	301	*	3.05825	3.9052	0.745633	3.02646	0.00108457	0.0255109	Promoter (1-2kb)	11	33156026	33157277	1252	2	ENSMUSG00000057113	ENSMUST00000146759	-1082	18148	Npm1	nucleophosmin 1
8	123254435	123254735	301	*	6.43196	6.74183	6.0368	0.661441	0.00109058	0.0256265	Promoter (<=1kb)	8	123254686	123265070	10385	1	ENSMUSG00000001065	ENSMUST00000154450	0	57247	Zfp276	zinc finger protein (C2H2 type) 276
5	114979635	114979935	301	*	4.00314	4.60716	2.94443	1.60467	0.00109563	0.0257191	Intron (ENSMUST00000129609/ENSMUSG00000086054, intron 1 of 2)	5	114975456	114976013	558	1	ENSMUSG00000106838	ENSMUST00000202592	4179
8	84192324	84192624	301	*	5.32203	5.72874	4.75357	0.929451	0.00109697	0.0257249	Distal Intergenic	8	84192774	84197667	4894	2	ENSMUSG00000097120	ENSMUST00000181282	5043
12	112673649	112673949	301	*	5.33938	4.82374	5.71846	-0.934234	0.00109973	0.0257626	Promoter (<=1kb)	12	112659160	112673944	14785	2	ENSMUSG00000001729	ENSMUST00000130342	0	11651	Akt1	thymoma viral proto-oncogene 1
9	75303913	75304213	301	*	5.10243	4.56435	5.49344	-0.96791	0.00110078	0.0257626	Promoter (2-3kb)	9	75306288	75345477	39190	1	ENSMUSG00000032192	ENSMUST00000213990	-2075	14697	Gnb5	guanine nucleotide binding protein (G protein), beta 5
7	34546667	34546967	301	*	4.69277	5.15901	3.9996	1.11087	0.00110698	0.0258817	Promoter (<=1kb)	7	34547206	34581691	34486	1	ENSMUSG00000086631	ENSMUST00000206001	-239
8	119778079	119778379	301	*	5.56965	5.94679	5.05762	0.844224	0.00110827	0.0258858	Promoter (<=1kb)	8	119772468	119778394	5927	2	ENSMUSG00000034105	ENSMUST00000212534	15	74347	Meak7	MTOR associated protein, eak-7 homolog
8	124751460	124751760	301	*	5.8244	6.16924	5.37034	0.754563	0.00111152	0.0259354	Promoter (<=1kb)	8	124740257	124751832	11576	2	ENSMUSG00000043068	ENSMUST00000055257	72	69627	Fam89a	family with sequence similarity 89, member A
13	23505864	23506164	301	*	4.72638	4.11496	5.15447	-1.07656	0.00111261	0.0259354	Distal Intergenic	13	23518142	23518250	109	1	ENSMUSG00000104750	ENSMUST00000199903	-11978
12	103532525	103532825	301	*	5.28985	4.77323	5.66947	-0.935636	0.00111393	0.0259402	Promoter (<=1kb)	12	103532570	103612904	80335	1	ENSMUSG00000021209	ENSMUST00000189871	0	74521	Ppp4r4	protein phosphatase 4, regulatory subunit 4
1	179652508	179652808	301	*	3.48392	4.19975	2.00023	2.12312	0.00111855	0.0260219	Distal Intergenic	1	179668210	179687189	18980	1	ENSMUSG00000038936	ENSMUST00000040538	-15402	109232	Sccpdh	saccharopine dehydrogenase (putative)
17	17490934	17491234	301	*	3.54565	4.24836	2.12077	2.05421	0.0011197	0.0260227	Distal Intergenic	17	17500343	17500944	602	1	ENSMUSG00000116532	ENSMUST00000232178	-9109	383297	Gm5232	proteasome (prosome, macropain) subunit, beta type 3 pseudogene
8	83698788	83699088	301	*	6.27128	6.60157	5.84219	0.715576	0.00112225	0.0260561	Promoter (<=1kb)	8	83670099	83699097	28999	2	ENSMUSG00000057672	ENSMUST00000132945	9	320795	Pkn1	protein kinase N1
8	89025726	89026026	301	*	5.08119	5.51436	4.45928	1.00843	0.00113061	0.0262241	Distal Intergenic	8	89024735	89024831	97	1	ENSMUSG00000099078	ENSMUST00000183771	991	102465899	Mir8110	microRNA 8110
19	23151674	23151974	301	*	4.31085	4.82568	3.50286	1.27108	0.00113558	0.0262984	Intron (ENSMUST00000036884/ENSMUSG00000033863, intron 1 of 1)	19	23149431	23149551	121	1	ENSMUSG00000080626	ENSMUST00000116976	2243	100316672	Mir1192	microRNA 1192
8	71381275	71381575	301	*	6.75655	7.05953	6.37255	0.643624	0.00113695	0.0262984	Promoter (<=1kb)	8	71375819	71381177	5359	2	ENSMUSG00000002393	ENSMUST00000137058	-98	13864	Nr2f6	nuclear receptor subfamily 2, group F, member 6
8	69885975	69886275	301	*	3.72444	2.4195	4.39823	-1.99586	0.00113719	0.0262984	Exon (ENSMUST00000057831/ENSMUSG00000044006, exon 3 of 8)	8	69880369	69887687	7319	2	ENSMUSG00000044006	ENSMUST00000057831	1412	68709	Cilp2	cartilage intermediate layer protein 2
8	92827405	92827705	301	*	4.92153	5.39189	4.21913	1.12503	0.00114309	0.0264086	5' UTR	8	92827291	92853420	26130	1	ENSMUSG00000031740	ENSMUST00000034187	114	17390	Mmp2	matrix metallopeptidase 2
8	47675070	47675370	301	*	6.0876	6.41503	5.66335	0.707727	0.00114545	0.0264371	Promoter (<=1kb)	8	47667178	47675158	7981	2	ENSMUSG00000063049	ENSMUST00000080353	0	69260	Ing2	inhibitor of growth family, member 2
8	70673413	70673713	301	*	5.98561	6.32947	5.53325	0.752076	0.00114725	0.0264475	Promoter (<=1kb)	8	70673432	70678746	5315	1	ENSMUSG00000031848	ENSMUST00000210987	0	50783	Lsm4	LSM4 homolog, U6 small nuclear RNA and mRNA degradation associated
8	84180307	84180607	301	*	3.95154	4.56254	2.87048	1.63314	0.00114817	0.0264475	Promoter (1-2kb)	8	84178873	84178961	89	2	ENSMUSG00000065483	ENSMUST00000083549	-1346	723819	Mir181c	microRNA 181c
17	30609322	30609622	301	*	4.74715	5.21021	4.06105	1.10089	0.00115001	0.0264639	Intron (ENSMUST00000235858/ENSMUSG00000118341, intron 1 of 6)	17	30607056	30608265	1210	1	ENSMUSG00000117749	ENSMUST00000236095	2266
3	96440780	96441080	301	*	3.56605	2.21687	4.25086	-2.04715	0.00115197	0.0264642	Exon (ENSMUST00000093126/ENSMUSG00000046317, exon 3 of 5)	3	96450446	96450611	166	1	ENSMUSG00000096838	ENSMUST00000083360	-9366
10	117024136	117024436	301	*	3.98329	2.99709	4.56362	-1.59391	0.00115229	0.0264642	Exon (ENSMUST00000020378/ENSMUSG00000020169, exon 10 of 10)	10	117043746	117045101	1356	1	ENSMUSG00000112242	ENSMUST00000217799	-19310
8	87690291	87690591	301	*	3.5007	4.22039	1.99911	2.14471	0.00116287	0.0266809	Intron (ENSMUST00000165770/ENSMUSG00000045333, intron 3 of 5)	8	87636657	87637013	357	1	ENSMUSG00000089301	ENSMUST00000158676	53634
8	105637130	105637430	301	*	6.54652	6.85291	6.15702	0.652385	0.00116917	0.0267992	Promoter (<=1kb)	8	105566698	105637393	70696	2	ENSMUSG00000005705	ENSMUST00000194091	0	11604	Agrp	agouti related neuropeptide
2	135648086	135648386	301	*	3.19794	4.00183	1.22195	2.67446	0.00117243	0.0268315	Promoter (<=1kb)	2	135648907	135652063	3157	1	ENSMUSG00000084762	ENSMUST00000146980	-521	102642414	Platr3	pluripotency associated transcript 3
12	86482736	86483036	301	*	3.4148	4.19778	1.57481	2.53215	0.00117288	0.0268315	Intron (ENSMUST00000116402/ENSMUSG00000021255, intron 2 of 6)	12	86470117	86519065	48949	1	ENSMUSG00000021255	ENSMUST00000167891	12619	26380	Esrrb	estrogen related receptor, beta
6	6138612	6138912	301	*	3.25159	4.03362	1.41741	2.51965	0.00117796	0.0269213	Intron (ENSMUST00000015256/ENSMUSG00000015112, intron 4 of 17)	6	6114988	6173951	58964	2	ENSMUSG00000015112	ENSMUST00000203990	35039	50799	Slc25a13	solute carrier family 25 (mitochondrial carrier, adenine nucleotide translocator), member 13
11	97060113	97060413	301	*	3.64189	2.21251	4.34562	-2.14563	0.00118343	0.0270199	Promoter (3-4kb)	11	97063768	97063874	107	1	ENSMUSG00000098769	ENSMUST00000183945	-3355	102465893	Mir8103	microRNA 8103
8	111056673	111056973	301	*	6.84299	7.14386	6.46237	0.638176	0.00118553	0.0270414	3' UTR	8	111056339	111057664	1326	1	ENSMUSG00000109941	ENSMUST00000210390	334	72544	Exosc6	exosome component 6
14	21489057	21489357	301	*	3.21675	4.0239	1.21825	2.69999	0.00118989	0.0271145	Intron (ENSMUST00000182996/ENSMUSG00000021767, intron 1 of 1)	14	21481459	21621977	140519	1	ENSMUSG00000021767	ENSMUST00000183201	7598	54169	Kat6b	K(lysine) acetyltransferase 6B
11	33202275	33202575	301	*	3.68355	2.50101	4.32456	-1.84304	0.00119674	0.0272269	Exon (ENSMUST00000037746/ENSMUSG00000040610, exon 2 of 3)	11	33200752	33203589	2838	2	ENSMUSG00000040610	ENSMUST00000037746	1014	27140	Tlx3	T cell leukemia, homeobox 3
11	85841806	85842106	301	*	3.93658	2.99935	4.49999	-1.52836	0.00119842	0.0272269	3' UTR	11	85846790	85850333	3544	2	ENSMUSG00000069785	ENSMUST00000146433	8227
6	77242984	77243284	301	*	3.79735	2.58766	4.44594	-1.87886	0.00119925	0.0272269	Promoter (<=1kb)	6	77242922	77244112	1191	1	ENSMUSG00000060780	ENSMUST00000161811	62	74342	Lrrtm1	leucine rich repeat transmembrane neuronal 1
2	131179282	131179582	301	*	6.3127	6.63406	5.89861	0.691727	0.00119949	0.0272269	Exon (ENSMUST00000089510/ENSMUSG00000068267, exon 1 of 1)	2	131175182	131180067	4886	2	ENSMUSG00000068267	ENSMUST00000089510	485	12616	Cenpb	centromere protein B
12	111538567	111538867	301	*	6.13307	5.77239	6.42137	-0.6903	0.00120074	0.0272287	Promoter (<=1kb)	12	111538782	111544923	6142	1	ENSMUSG00000021282	ENSMUST00000050993	0	217869	Eif5	eukaryotic translation initiation factor 5
8	125669918	125670218	301	*	6.1125	6.44311	5.68286	0.716308	0.00120234	0.0272388	Promoter (<=1kb)	8	125669818	125673359	3542	1	ENSMUSG00000050930	ENSMUST00000053078	100	74393	Map10	microtubule-associated protein 10
12	111445678	111445978	301	*	4.43926	3.70264	4.92454	-1.25633	0.00120773	0.0273178	Promoter (<=1kb)	12	111446084	111453825	7742	1	ENSMUSG00000021281	ENSMUST00000174692	-106	21928	Tnfaip2	tumor necrosis factor, alpha-induced protein 2
8	124721588	124721888	301	*	6.79199	7.09962	6.40047	0.655782	0.00120817	0.0273178	Promoter (<=1kb)	8	124671332	124721964	50633	2	ENSMUSG00000037300	ENSMUST00000117624	76	234875	Ttc13	tetratricopeptide repeat domain 13
3	96684946	96685246	301	*	3.90699	2.87382	4.50284	-1.65468	0.00121036	0.0273408	3' UTR	3	96680093	96683202	3110	1	ENSMUSG00000038354	ENSMUST00000130429	4853	213121	Ankrd35	ankyrin repeat domain 35
18	84935406	84935706	301	*	4.82497	5.28453	4.1466	1.09001	0.00121647	0.0274522	Intron (ENSMUST00000224467/ENSMUSG00000034391, intron 1 of 9)	18	84935158	84981376	46219	1	ENSMUSG00000034391	ENSMUST00000037718	248	50764	Fbxo15	F-box protein 15
8	83715457	83715757	301	*	6.90057	7.20477	6.51461	0.646871	0.00122267	0.0275422	Promoter (<=1kb)	8	83715548	83723348	7801	1	ENSMUSG00000005481	ENSMUST00000109810	0	68278	Ddx39a	DEAD box helicase 39a
9	110380830	110381130	301	*	4.36869	3.66293	4.84054	-1.21201	0.00122281	0.0275422	Exon (ENSMUST00000098350/ENSMUSG00000032485, exon 16 of 23)	9	110378293	110378776	484	1	ENSMUSG00000032485	ENSMUST00000196424	2537	235623	Scap	SREBF chaperone
X	100767807	100768107	301	*	5.05136	4.52453	5.43643	-0.950656	0.00123467	0.0277824	Promoter (<=1kb)	20	100767995	100818410	50416	1	ENSMUSG00000000881	ENSMUST00000147863	0	53310	Dlg3	discs large MAGUK scaffold protein 3
8	94214603	94214903	301	*	6.43549	6.78156	5.9793	0.758511	0.00123682	0.0278039	Promoter (<=1kb)	8	94214606	94292816	78211	1	ENSMUSG00000032939	ENSMUST00000212062	0	71805	Nup93	nucleoporin 93
11	77904104	77904404	301	*	3.62375	4.29664	2.32235	1.90588	0.0012458	0.027979	Distal Intergenic	11	77880615	77894096	13482	2	ENSMUSG00000017453	ENSMUST00000017597	-10008	19193	Pipox	pipecolic acid oxidase
4	143296889	143297189	301	*	3.22362	4.00167	1.41358	2.49173	0.00124781	0.0279829	Intron (ENSMUST00000030317/ENSMUSG00000028583, intron 1 of 5)	4	143268346	143299463	31118	2	ENSMUSG00000028583	ENSMUST00000119654	2274	14726	Pdpn	podoplanin
11	8634590	8634890	301	*	3.58474	4.27191	2.22585	1.97536	0.00124837	0.0279829	Intron (ENSMUST00000020695/ENSMUSG00000020422, intron 1 of 30)	11	8431652	8624887	193236	2	ENSMUSG00000020422	ENSMUST00000239091	-9703	319939	Tns3	tensin 3
8	84201001	84201301	301	*	6.21345	6.52983	5.80763	0.678413	0.00125669	0.0281425	Exon (ENSMUST00000193908/ENSMUSG00000103593, exon 1 of 1)	8	84200869	84203049	2181	1	ENSMUSG00000103593	ENSMUST00000193908	132
8	111030046	111030346	301	*	4.22423	4.77317	3.32721	1.39241	0.00125978	0.0281847	Intron (ENSMUST00000065784/ENSMUSG00000033658, intron 1 of 11)	8	111006659	111031751	25093	2	ENSMUSG00000033658	ENSMUST00000065784	1405	234733	Ddx19b	DEAD box helicase 19b
3	34764727	34765027	301	*	3.52466	4.22309	2.11831	2.03155	0.00126624	0.028302	Distal Intergenic	3	34772075	34782346	10272	1	ENSMUSG00000106519	ENSMUST00000197492	-7048	102638436	Gm38509	predicted gene, 38509
4	141287253	141287553	301	*	4.66192	5.12948	3.96581	1.11499	0.00127826	0.0285434	Distal Intergenic	4	141278439	141279794	1356	1	ENSMUSG00000085395	ENSMUST00000142429	8814	100503810	Gm13056	predicted gene 13056
11	62510165	62510465	301	*	3.58197	4.2699	2.21993	1.97923	0.00128158	0.0285901	Intron (ENSMUST00000014389/ENSMUSG00000014245, intron 5 of 6)	11	62522741	62523542	802	1	ENSMUSG00000086636	ENSMUST00000143382	-12276
13	113600114	113600414	301	*	2.66623	3.58846	0	3.90243	0.001283	0.0285946	Intron (ENSMUST00000109241/ENSMUSG00000042364, intron 1 of 1)	13	113592185	113613641	21457	2	ENSMUSG00000042364	ENSMUST00000223993	13227	170625	Snx18	sorting nexin 18
2	44556879	44557179	301	*	4.01293	3.11617	4.56177	-1.47472	0.00128473	0.0285964	Distal Intergenic	2	44565133	44571347	6215	2	ENSMUSG00000036890	ENSMUST00000134813	14168	227835	Gtdc1	glycosyltransferase-like domain containing 1
14	118698943	118699243	301	*	2.66122	3.58317	0	3.89719	0.00128615	0.0285964	Intron (ENSMUST00000036554/ENSMUSG00000032849, intron 1 of 30)	14	118484333	118699492	215160	2	ENSMUSG00000032849	ENSMUST00000228848	249	239273	Abcc4	ATP-binding cassette, sub-family C (CFTR/MRP), member 4
16	96757575	96757875	301	*	3.05953	0.997297	3.87556	-2.84415	0.00128704	0.0285964	Intron (ENSMUST00000232800/ENSMUSG00000117000, intron 2 of 4)	16	96723512	96730778	7267	1	ENSMUSG00000117000	ENSMUST00000233368	34063
2	166010804	166011104	301	*	3.27478	4.06073	1.41627	2.54768	0.00128798	0.0285964	Intron (ENSMUST00000109252/ENSMUSG00000027678, intron 1 of 22)	2	165992637	166073242	80606	1	ENSMUSG00000027678	ENSMUST00000088095	18167	17979	Ncoa3	nuclear receptor coactivator 3
13	40869293	40869593	301	*	2.90971	3.77558	0.41605	3.20281	0.00128953	0.0286036	Intron (ENSMUST00000110191/ENSMUSG00000021360, intron 1 of 2)	13	40865791	40865862	72	1	ENSMUSG00000093269	ENSMUST00000175528	3502	100628630	Mir5124a	microRNA 5124a
11	101265072	101265372	301	*	3.72335	2.58418	4.35187	-1.78879	0.00129233	0.028613	Promoter (<=1kb)	11	101265308	101274129	8822	1	ENSMUSG00000035112	ENSMUST00000170056	0	69847	Wnk4	WNK lysine deficient protein kinase 4
8	92355873	92356173	301	*	6.15405	6.48719	5.72015	0.723119	0.00129241	0.028613	Promoter (<=1kb)	8	92326038	92356120	30083	2	ENSMUSG00000031736	ENSMUST00000034183	0	71296	Crnde	colorectal neoplasia differentially expressed (non-protein coding)
9	110727022	110727322	301	*	3.98817	2.9331	4.59103	-1.68418	0.00129642	0.0286747	Exon (ENSMUST00000198865/ENSMUSG00000032492, exon 9 of 16)	9	110741861	110769147	27287	1	ENSMUSG00000059741	ENSMUST00000200011	-14539	17897	Myl3	myosin, light polypeptide 3
8	77610228	77610528	301	*	6.18439	6.51451	5.7556	0.715034	0.00129973	0.0286942	5' UTR	8	77595982	77610653	14672	2	ENSMUSG00000031617	ENSMUST00000034030	125	234463	Tmem184c	transmembrane protein 184C
8	122550880	122551180	301	*	6.7154	7.01213	6.34141	0.627351	0.00130001	0.0286942	5' UTR	8	122481698	122551329	69632	2	ENSMUSG00000014444	ENSMUST00000067252	149	234839	Piezo1	piezo-type mechanosensitive ion channel component 1
8	40634455	40634755	301	*	5.87484	6.20992	5.4376	0.728102	0.00130099	0.0286942	Promoter (<=1kb)	8	40564031	40634759	70729	2	ENSMUSG00000039431	ENSMUST00000173957	4	54384	Mtmr7	myotubularin related protein 7
10	76028552	76028852	301	*	3.64506	4.32272	2.32481	1.92936	0.00130232	0.0286966	Promoter (3-4kb)	10	76032650	76038388	5739	1	ENSMUSG00000049764	ENSMUST00000218627	-3798	64453	Zfp280b	zinc finger protein 280B
2	71746500	71746800	301	*	4.3705	4.87696	3.58323	1.24262	0.00130718	0.0287764	Promoter (<=1kb)	2	71747507	71750200	2694	1	ENSMUSG00000086641	ENSMUST00000145563	-707
9	69759345	69759645	301	*	4.48202	3.73237	4.97285	-1.27505	0.00130933	0.0287965	Exon (ENSMUST00000071281/ENSMUSG00000059246, exon 2 of 2)	9	69758740	69830845	72106	1	ENSMUSG00000097623	ENSMUST00000180488	605
15	81936829	81937129	301	*	4.07459	3.22072	4.60735	-1.41702	0.0013113	0.0287977	Promoter (<=1kb)	15	81936982	81946869	9888	1	ENSMUSG00000042109	ENSMUST00000135663	0	105859	Csdc2	cold shock domain containing C2, RNA binding
12	111907885	111908185	301	*	5.21665	4.70268	5.59483	-0.931392	0.00131218	0.0287977	Promoter (<=1kb)	12	111828457	111908110	79654	2	ENSMUSG00000021285	ENSMUST00000054815	0	21981	Ppp1r13b	protein phosphatase 1, regulatory subunit 13B
8	69395264	69395564	301	*	5.83735	6.17738	5.39163	0.741459	0.00131308	0.0287977	Promoter (<=1kb)	8	69366510	69395522	29013	2	ENSMUSG00000110444	ENSMUST00000072427	0	378466	Gm10033	predicted gene 10033
1	93227352	93227652	301	*	3.77372	4.4157	2.58773	1.76464	0.00132466	0.0290246	Intron (ENSMUST00000138595/ENSMUSG00000084989, intron 31 of 31)	1	93235841	93301065	65225	1	ENSMUSG00000047793	ENSMUST00000062202	-8189	208777	Sned1	sushi, nidogen and EGF-like domains 1
8	126592699	126592999	301	*	6.49855	6.80914	6.10221	0.66339	0.00132836	0.0290684	Exon (ENSMUST00000054960/ENSMUSG00000051495, exon 1 of 2)	8	126588296	126593986	5691	2	ENSMUSG00000051495	ENSMUST00000054960	987	270110	Irf2bp2	interferon regulatory factor 2 binding protein 2
2	75632890	75633190	301	*	4.22279	4.75542	3.36926	1.33324	0.00132951	0.0290684	Exon (ENSMUST00000119695/ENSMUSG00000082152, exon 1 of 1)	2	75632638	75633382	745	2	ENSMUSG00000082152	ENSMUST00000119695	192
1	165655441	165655741	301	*	3.36809	4.11375	1.73884	2.29053	0.0013304	0.0290684	Exon (ENSMUST00000097474/ENSMUSG00000040723, exon 5 of 6)	1	165643899	165644688	790	2	ENSMUSG00000104517	ENSMUST00000192126	-10753	100417122	Gm18407	translin-associated factor X pseudogene
15	97592767	97593067	301	*	3.22572	4.00329	1.4186	2.48838	0.00133607	0.0291649	Distal Intergenic	15	97557791	97558290	500	2	ENSMUSG00000116131	ENSMUST00000230522	-34477
14	34768527	34768827	301	*	4.41526	4.94116	3.57919	1.31057	0.0013416	0.0292585	Exon (ENSMUST00000181044/ENSMUSG00000097310, exon 3 of 3)	14	34768956	34770055	1100	2	ENSMUSG00000115109	ENSMUST00000228194	1228
10	114801605	114801905	301	*	4.81498	4.24838	5.22075	-1.01013	0.00134395	0.0292822	Promoter (<=1kb)	10	114801726	114816831	15106	1	ENSMUSG00000084865	ENSMUST00000139331	0	102633245	Gm15723	predicted gene 15723
X	68762105	68762405	301	*	3.60538	4.27343	2.32283	1.88235	0.001346	0.0292997	Exon (ENSMUST00000069731/ENSMUSG00000062170, exon 1 of 5)	20	68761934	68804567	42634	1	ENSMUSG00000062170	ENSMUST00000071848	171	207854	Fmr1nb	Fmr1 neighbor
6	39410837	39411137	301	*	3.6255	4.29848	2.32374	1.90634	0.00134919	0.0293416	Intron (ENSMUST00000114823/ENSMUSG00000029922, intron 1 of 7)	6	39401275	39405081	3807	2	ENSMUSG00000029922	ENSMUST00000122874	-5756	54484	Mkrn1	makorin, ring finger protein, 1
9	40782421	40782721	301	*	4.53457	5.02928	3.77571	1.20364	0.00135044	0.0293417	3' UTR	9	40780748	40783461	2714	2	ENSMUSG00000087135	ENSMUST00000132716	740
10	13501143	13501443	301	*	3.90851	2.94171	4.48224	-1.5674	0.00135425	0.0293704	Promoter (<=1kb)	10	13501084	13513098	12015	1	ENSMUSG00000019810	ENSMUST00000150048	59	66848	Fuca2	fucosidase, alpha-L- 2, plasma
8	120276537	120276837	301	*	5.00714	5.42575	4.41502	0.96409	0.00135443	0.0293704	Intron (ENSMUST00000127664/ENSMUSG00000092329, intron 1 of 15)	8	120228456	120553634	325179	1	ENSMUSG00000031822	ENSMUST00000180448	48081	382034	Gse1	genetic suppressor element 1, coiled-coil protein
4	123667884	123668184	301	*	2.80711	3.70075	0	3.51197	0.00135554	0.0293704	Intron (ENSMUST00000140510/ENSMUSG00000087307, intron 2 of 2)	4	123667616	123671217	3602	1	ENSMUSG00000087307	ENSMUST00000138861	268
11	76357208	76357508	301	*	3.22532	4.00314	1.41666	2.49015	0.00135754	0.0293866	Intron (ENSMUST00000021204/ENSMUSG00000020844, intron 1 of 7)	11	76358803	76399068	40266	2	ENSMUSG00000020844	ENSMUST00000131472	41560	18230	Nxn	nucleoredoxin
12	86823966	86824266	301	*	4.78802	5.25896	4.08431	1.1264	0.00136792	0.0295839	Distal Intergenic	12	86809957	86810258	302	1	ENSMUSG00000088403	ENSMUST00000157778	14009
8	82773774	82774074	301	*	6.37819	6.69202	5.97654	0.671839	0.00137536	0.0297052	Promoter (<=1kb)	8	82764398	82774114	9717	2	ENSMUSG00000031711	ENSMUST00000211462	40	30932	Zfp330	zinc finger protein 330
9	21238745	21239045	301	*	6.17779	6.50486	5.75413	0.706868	0.00137622	0.0297052	Promoter (<=1kb)	9	21230067	21238813	8747	2	ENSMUSG00000003308	ENSMUST00000164812	0	50868	Keap1	kelch-like ECH-associated protein 1
7	28825514	28825814	301	*	4.24508	4.76935	3.4132	1.30367	0.00137769	0.0297052	Promoter (<=1kb)	7	28825958	28831233	5276	1	ENSMUSG00000053898	ENSMUST00000124017	-144	51798	Ech1	enoyl coenzyme A hydratase 1, peroxisomal
15	59633826	59634126	301	*	3.45781	4.16888	1.99582	2.09681	0.00137862	0.0297052	Distal Intergenic	15	59648350	59657099	8750	1	ENSMUSG00000032501	ENSMUST00000067543	-14224	211770	Trib1	tribbles pseudokinase 1
2	31305244	31305544	301	*	3.11054	3.93413	0.991453	2.82564	0.00138179	0.0297268	Distal Intergenic	2	31314415	31460738	146324	1	ENSMUSG00000055632	ENSMUST00000113532	-8871	665700	Hmcn2	hemicentin 2
8	110997511	110997811	301	*	6.73192	7.0384	6.34227	0.652737	0.0013849	0.0297268	Promoter (<=1kb)	8	110974996	110997800	22805	2	ENSMUSG00000015023	ENSMUST00000040416	0	13680	Ddx19a	DEAD box helicase 19a
16	37916309	37916609	301	*	4.71884	4.11534	5.14305	-1.0648	0.00138524	0.0297268	Promoter (<=1kb)	16	37916496	38007530	91035	1	ENSMUSG00000046961	ENSMUST00000061274	0	239845	Gpr156	G protein-coupled receptor 156
12	111038595	111038895	301	*	4.97583	4.4368	5.36734	-0.969004	0.00138591	0.0297268	Promoter (<=1kb)	12	111039351	111115901	76551	1	ENSMUSG00000037896	ENSMUST00000084968	-456	217864	Rcor1	REST corepressor 1
3	87412026	87412326	301	*	2.90917	3.77576	0.408127	3.21073	0.00138661	0.0297268	Distal Intergenic	3	87435773	87467523	31751	1	ENSMUSG00000048031	ENSMUST00000194102	-23447	329693	Fcrl5	Fc receptor-like 5
13	62263642	62263942	301	*	4.86694	5.2979	4.24961	1.00102	0.00138773	0.0297268	Promoter (<=1kb)	13	62263566	62273287	9722	1	ENSMUSG00000113081	ENSMUST00000221637	76
3	58636672	58636972	301	*	4.96179	4.41577	5.35695	-0.979548	0.00138998	0.0297268	Exon (ENSMUST00000041115/ENSMUSG00000070471, exon 1 of 14)	3	58616300	58637207	20908	2	ENSMUSG00000070471	ENSMUST00000041115	235	545527	Erich6	glutamate rich 6
8	111853874	111854174	301	*	6.81784	7.11689	6.44014	0.633431	0.00139031	0.0297268	Exon (ENSMUST00000034432/ENSMUSG00000031954, exon 1 of 7)	8	111768491	111854291	85801	2	ENSMUSG00000031954	ENSMUST00000034432	117	23837	Cfdp1	craniofacial development protein 1
X	10485440	10485740	301	*	3.2733	1.40457	4.06089	-2.64233	0.0013921	0.0297268	Intron (ENSMUST00000076354/ENSMUSG00000058254, intron 1 of 7)	20	10485158	10596605	111448	1	ENSMUSG00000058254	ENSMUST00000149982	282	21912	Tspan7	tetraspanin 7
4	148891091	148891391	301	*	5.03955	5.46176	4.44013	0.975014	0.00139235	0.0297268	Exon (ENSMUST00000140617/ENSMUSG00000028977, exon 3 of 3)	4	148889381	148891936	2556	1	ENSMUSG00000028977	ENSMUST00000140617	1710	69743	Casz1	castor zinc finger 1
2	151970597	151970897	301	*	4.23432	4.77072	3.37091	1.34681	0.00139589	0.0297752	5' UTR	2	151969737	151973394	3658	2	ENSMUSG00000027459	ENSMUST00000109863	2497	73847	Fam110a	family with sequence similarity 110, member A
16	11175951	11176251	301	*	6.35797	6.67743	5.94703	0.686721	0.00139749	0.0297822	Promoter (<=1kb)	16	11145210	11176100	30891	2	ENSMUSG00000037965	ENSMUST00000138185	0	106205	Zc3h7a	zinc finger CCCH type containing 7 A
8	41416771	41417071	301	*	6.14389	6.46665	5.72746	0.695324	0.001402	0.0298463	Promoter (<=1kb)	8	41397459	41417074	19616	2	ENSMUSG00000031590	ENSMUST00000033999	3	14300	Frg1	FSHD region gene 1
3	152100163	152100463	301	*	4.15338	3.32037	4.67809	-1.38904	0.00140306	0.0298463	Intron (ENSMUST00000152283/ENSMUSG00000039131, intron 3 of 3)	3	152094019	152102854	8836	2	ENSMUSG00000039131	ENSMUST00000152680	2391	54120	Gipc2	GIPC PDZ domain containing family, member 2
2	168106890	168107190	301	*	3.62506	4.29901	2.31947	1.9111	0.0014087	0.0299391	Distal Intergenic	2	168114877	168172664	57788	1	ENSMUSG00000118526	ENSMUST00000239040	-7687
4	132733303	132733603	301	*	4.15438	4.69725	3.27375	1.36967	0.00141078	0.029956	Promoter (<=1kb)	4	132724897	132732546	7650	2	ENSMUSG00000037752	ENSMUST00000045550	-757	381560	Xkr8	X-linked Kx blood group related 8
15	98565281	98565581	301	*	2.63012	3.55022	0	3.86288	0.00142476	0.0301558	Promoter (<=1kb)	15	98544567	98565139	20573	2	ENSMUSG00000011960	ENSMUST00000164294	-142	12455	Ccnt1	cyclin T1
4	94601640	94601940	301	*	2.91198	3.77855	0.41119	3.2105	0.0014255	0.0301558	Intron (ENSMUST00000107107/ENSMUSG00000028577, intron 1 of 13)	4	94585760	94603135	17376	2	ENSMUSG00000028577	ENSMUST00000136669	1195	18786	Plaa	phospholipase A2, activating protein
17	29039643	29039943	301	*	3.79157	4.41804	2.65937	1.69681	0.00142586	0.0301558	Promoter (<=1kb)	17	29039694	29041731	2038	1	ENSMUSG00000071172	ENSMUST00000233105	0	20383	Srsf3	serine and arginine-rich splicing factor 3
2	59630447	59630747	301	*	3.80413	4.43453	2.65853	1.71402	0.00142642	0.0301558	Intron (ENSMUST00000112568/ENSMUSG00000035168, intron 1 of 26)	2	59630063	59647005	16943	1	ENSMUSG00000035168	ENSMUST00000128030	384	66860	Tanc1	tetratricopeptide repeat, ankyrin repeat and coiled-coil containing 1
3	95904680	95904980	301	*	3.58078	2.22238	4.26783	-2.05854	0.00142664	0.0301558	Promoter (<=1kb)	3	95897768	95904691	6924	2	ENSMUSG00000038526	ENSMUST00000036181	0	23831	Car14	carbonic anhydrase 14
8	69935877	69936177	301	*	3.94003	4.52608	2.93674	1.53168	0.00142861	0.0301701	5' UTR	8	69917761	69936526	18766	2	ENSMUSG00000036180	ENSMUST00000212277	349	234366	Gatad2a	GATA zinc finger domain containing 2A
4	32995663	32995963	301	*	3.43453	4.16692	1.87222	2.21457	0.00143194	0.0301739	Exon (ENSMUST00000098190/ENSMUSG00000028278, exon 2 of 7)	4	33001995	33002321	327	2	ENSMUSG00000081025	ENSMUST00000119473	6358
10	75648830	75649130	301	*	3.0879	3.90818	0.99406	2.79735	0.00143254	0.0301739	Promoter (4-5kb)	10	75636708	75644008	7301	2	ENSMUSG00000006342	ENSMUST00000219733	-4822	71733	Susd2	sushi domain containing 2
12	102878043	102878343	301	*	5.83553	5.40295	6.16788	-0.805674	0.00143374	0.0301739	Promoter (<=1kb)	12	102784638	102878278	93641	2	ENSMUSG00000041702	ENSMUST00000045652	0	238386	Btbd7	BTB (POZ) domain containing 7
11	100322095	100322395	301	*	3.85834	4.45957	2.8084	1.59171	0.00143396	0.0301739	3' UTR	11	100320884	100321533	650	1	ENSMUSG00000035530	ENSMUST00000132618	1211	20918	Eif1	eukaryotic translation initiation factor 1
16	38476400	38476700	301	*	3.58682	4.27482	2.22446	1.97964	0.00143729	0.0302168	Intron (ENSMUST00000231716/ENSMUSG00000075122, intron 3 of 6)	16	38459118	38486447	27330	1	ENSMUSG00000075122	ENSMUST00000232409	17282	12519	Cd80	CD80 antigen
7	120835109	120835409	301	*	3.58885	2.22573	4.27704	-2.06438	0.00144095	0.0302487	Distal Intergenic	7	120842831	120907450	64620	1	ENSMUSG00000035064	ENSMUST00000047875	-7422	13631	Eef2k	eukaryotic elongation factor-2 kinase
1	136677368	136677668	301	*	3.71712	4.36627	2.50542	1.79611	0.0014414	0.0302487	Intron (ENSMUST00000180495/ENSMUSG00000097113, intron 3 of 4)	1	136676473	136682727	6255	1	ENSMUSG00000097113	ENSMUST00000181491	895	100503460	Gm19705	predicted gene, 19705
2	170195097	170195397	301	*	4.10506	4.68756	3.11241	1.51929	0.00145171	0.0304378	Distal Intergenic	2	170120719	170148103	27385	2	ENSMUSG00000052056	ENSMUST00000149318	-46994	228913	Zfp217	zinc finger protein 217
10	62895498	62895798	301	*	3.32318	4.1172	1.41327	2.60669	0.00145497	0.0304788	Promoter (1-2kb)	10	62893409	62893514	106	2	ENSMUSG00000084569	ENSMUST00000122620	-1984	115487492	Gm26479	predicted gene, 26479
8	88697128	88697428	301	*	6.29652	6.62121	5.87687	0.700581	0.00145795	0.0305138	Promoter (<=1kb)	8	88697075	88748455	51381	1	ENSMUSG00000036712	ENSMUST00000209559	53	74256	Cyld	CYLD lysine 63 deubiquitinase
8	70866075	70866375	301	*	4.262	4.79232	3.4145	1.32526	0.00146597	0.0306542	Promoter (2-3kb)	8	70843906	70863258	19353	2	ENSMUSG00000002908	ENSMUST00000212611	-2817	84036	Kcnn1	potassium intermediate/small conductance calcium-activated channel, subfamily N, member 1
9	123930520	123930820	301	*	5.08035	4.56475	5.45942	-0.933578	0.001468	0.0306691	Distal Intergenic	9	123962124	123968692	6569	2	ENSMUSG00000025804	ENSMUST00000026911	37872	12768	Ccr1	chemokine (C-C motif) receptor 1
18	33831765	33832065	301	*	3.34638	4.08906	1.73247	2.27231	0.00147119	0.0306787	Intron (ENSMUST00000025234/ENSMUSG00000024376, intron 14 of 23)	18	33802540	33832794	30255	2	ENSMUSG00000024376	ENSMUST00000236514	729	13824	Epb41l4a	erythrocyte membrane protein band 4.1 like 4a
7	79592415	79592715	301	*	4.22181	3.46124	4.71723	-1.28879	0.00147148	0.0306787	Promoter (<=1kb)	7	79586648	79592613	5966	2	ENSMUSG00000108776	ENSMUST00000205717	0
17	70834849	70835149	301	*	5.07136	5.49077	4.47763	0.966667	0.0014724	0.0306787	Intron (ENSMUST00000175668/ENSMUSG00000093622, intron 1 of 1)	17	70834664	70836044	1381	1	ENSMUSG00000093622	ENSMUST00000175668	185
8	106168810	106169110	301	*	6.39945	6.7112	6.00124	0.66634	0.00148983	0.0310143	Promoter (<=1kb)	8	106168857	106198706	29850	1	ENSMUSG00000031904	ENSMUST00000034378	0	330836	Slc7a6	solute carrier family 7 (cationic amino acid transporter, y+ system), member 6
6	124809195	124809495	301	*	5.24281	5.6355	4.70152	0.888252	0.00149146	0.0310206	Promoter (<=1kb)	6	124809298	124810619	1322	1	ENSMUSG00000038451	ENSMUST00000112473	0	14794	Spsb2	splA/ryanodine receptor domain and SOCS box containing 2
7	3338797	3339097	301	*	4.37292	4.89452	3.54783	1.29511	0.00150196	0.0312112	Exon (ENSMUST00000092891/ENSMUSG00000069806, exon 4 of 6)	7	3338216	3366899	28684	1	ENSMUSG00000069806	ENSMUST00000203497	581	81904	Cacng7	calcium channel, voltage-dependent, gamma subunit 7
13	21169466	21169766	301	*	3.86005	2.87672	4.43941	-1.58873	0.00151437	0.0314411	Distal Intergenic	13	21179445	21194724	15280	1	ENSMUSG00000021326	ENSMUST00000222544	-9679	19720	Trim27	tripartite motif-containing 27
8	48135565	48135865	301	*	3.56223	4.24388	2.22591	1.94745	0.00152673	0.0316695	Intron (ENSMUST00000174278/ENSMUSG00000031562, intron 3 of 5)	8	48110211	48153233	43023	1	ENSMUSG00000031562	ENSMUST00000174379	25354	320685	Dctd	dCMP deaminase
2	173516537	173516837	301	*	2.78224	0.00362856	3.67309	-3.55375	0.00153112	0.0317276	Distal Intergenic	2	173522586	173528501	5916	1	ENSMUSG00000027518	ENSMUST00000029023	-5749	72221	1700021F07Rik	RIKEN cDNA 1700021F07 gene
8	105851631	105851931	301	*	6.58928	6.90594	6.18298	0.679456	0.00153225	0.0317276	Promoter (<=1kb)	8	105848749	105851969	3221	2	ENSMUSG00000036672	ENSMUST00000212873	38	320394	Cenpt	centromere protein T
8	108704523	108704823	301	*	6.17052	6.49297	5.75462	0.694501	0.00153362	0.0317278	Intron (ENSMUST00000220518/ENSMUSG00000038872, intron 7 of 15)	8	108703100	108800270	97171	1	ENSMUSG00000038872	ENSMUST00000188994	1423	11906	Zfhx3	zinc finger homeobox 3
6	116673494	116673794	301	*	4.35846	3.6205	4.84431	-1.25781	0.00154144	0.0318615	Promoter (<=1kb)	6	116642925	116673789	30865	2	ENSMUSG00000042129	ENSMUST00000204313	0	213391	Rassf4	Ras association (RalGDS/AF-6) domain family member 4
17	27048188	27048488	301	*	3.64329	4.29774	2.41217	1.81929	0.00154284	0.0318621	Exon (ENSMUST00000236359/ENSMUSG00000117799, exon 2 of 2)	17	27048276	27051414	3139	2	ENSMUSG00000117799	ENSMUST00000236359	2926
4	136177832	136178132	301	*	3.62611	4.32332	2.22498	2.02731	0.0015476	0.0319058	Promoter (2-3kb)	4	136180783	136186807	6025	1	ENSMUSG00000018983	ENSMUST00000149750	-2651	242705	E2f2	E2F transcription factor 2
9	32096469	32096769	301	*	3.29332	4.05458	1.58033	2.38452	0.00154769	0.0319058	Distal Intergenic	9	32078281	32078765	485	1	ENSMUSG00000110840	ENSMUST00000214707	18188
7	120809777	120810077	301	*	4.43856	3.77439	4.89163	-1.15249	0.00155423	0.0320124	Promoter (2-3kb)	7	120812365	120831193	18829	1	ENSMUSG00000109392	ENSMUST00000208668	-2288	436008	Gm5737	predicted gene 5737
18	56710680	56710980	301	*	2.16349	3.16349	0	6.16262	0.00155823	0.0320358	Intron (ENSMUST00000025486/ENSMUSG00000024590, intron 1 of 10)	18	56707813	56753424	45612	1	ENSMUSG00000024590	ENSMUST00000025486	2867	16906	Lmnb1	lamin B1
7	24087160	24087460	301	*	4.0721	4.62346	3.16845	1.40021	0.00155893	0.0320358	Intron (ENSMUST00000207002/ENSMUSG00000057101, intron 2 of 2)	7	24081954	24107692	25739	1	ENSMUSG00000057101	ENSMUST00000203854	5206	210135	Zfp180	zinc finger protein 180
2	27540748	27541048	301	*	5.01717	5.44009	4.41631	0.977097	0.00156066	0.0320358	Intron (ENSMUST00000142511/ENSMUSG00000085929, intron 1 of 1)	2	27540429	27543185	2757	1	ENSMUSG00000085929	ENSMUST00000132898	319	105244102	Gm13421	predicted gene 13421
10	21374080	21374380	301	*	2.58495	0	3.50287	-3.90091	0.00156085	0.0320358	Promoter (2-3kb)	10	21377291	21396585	19295	1	ENSMUSG00000037542	ENSMUST00000042699	-2911	237320	Aldh8a1	aldehyde dehydrogenase 8 family, member A1
10	80399935	80400235	301	*	5.47555	5.84851	4.97124	0.832193	0.00156976	0.0321732	Promoter (<=1kb)	10	80392539	80399550	7012	2	ENSMUSG00000035478	ENSMUST00000105349	-385	17192	Mbd3	methyl-CpG binding domain protein 3
17	27038374	27038674	301	*	3.87259	4.47905	2.80613	1.61334	0.0015703	0.0321732	Distal Intergenic	17	27032859	27037624	4766	1	ENSMUSG00000048731	ENSMUST00000235543	5515	70772	Ggnbp1	gametogenetin binding protein 1
19	3842782	3843082	301	*	3.45843	4.16803	2.00302	2.08885	0.00157179	0.0321755	Intron (ENSMUST00000118575/ENSMUSG00000082848, intron 1 of 2)	19	3851773	3894365	42593	1	ENSMUSG00000024843	ENSMUST00000128694	-8691	12660	Chka	choline kinase alpha
17	88625169	88625469	301	*	4.74563	5.18277	4.11542	1.01957	0.00157574	0.0322281	Promoter (1-2kb)	17	88626555	88645724	19170	1	ENSMUSG00000033855	ENSMUST00000163588	-1086	77057	Ston1	stonin 1
17	21731080	21731380	301	*	4.62411	5.08843	3.93521	1.10444	0.00158343	0.0323572	Intron (ENSMUST00000182827/ENSMUSG00000061544, intron 1 of 5)	17	21730795	21745061	14267	1	ENSMUSG00000061544	ENSMUST00000182827	285	381067	Zfp229	zinc finger protein 229
2	131846143	131846443	301	*	2.06776	3.06776	0	6.0683	0.00159645	0.0325946	Promoter (<=1kb)	2	131846395	131847688	1294	1	ENSMUSG00000083469	ENSMUST00000121700	0	100417991	Gm14281	chromosome segregation 1-like pseudogene
8	80857864	80858164	301	*	4.3601	4.86178	3.58447	1.22627	0.00159968	0.032595	Intron (ENSMUST00000210676/ENSMUSG00000031714, intron 1 of 10)	8	80879940	80881169	1230	1	ENSMUSG00000109587	ENSMUST00000211421	-21776
5	64808903	64809203	301	*	3.58481	4.27187	2.22634	1.97484	0.0016001	0.032595	Promoter (3-4kb)	5	64812339	64829482	17144	1	ENSMUSG00000029178	ENSMUST00000166409	-3136	16599	Klf3	Kruppel-like factor 3 (basic)
3	133513852	133514152	301	*	3.243	4.02488	1.40979	2.51847	0.00160066	0.032595	5' UTR	3	133538762	133544286	5525	2	ENSMUSG00000040943	ENSMUST00000195913	30134	214133	Tet2	tet methylcytosine dioxygenase 2
1	52431527	52431827	301	*	3.68068	4.3211	2.50025	1.75634	0.00160626	0.0326686	Distal Intergenic	1	52444436	52444544	109	2	ENSMUSG00000065192	ENSMUST00000083258	12717	115487589	Gm23460	predicted gene, 23460
2	154645765	154646065	301	*	4.4593	3.80627	4.9072	-1.13642	0.00160761	0.0326686	3' UTR	2	154651705	154694780	43076	1	ENSMUSG00000038467	ENSMUST00000151668	-5640	75608	Chmp4b	charged multivesicular body protein 4B
11	77766588	77766888	301	*	4.48027	4.95266	3.77328	1.12974	0.00160846	0.0326686	Promoter (<=1kb)	11	77766736	77865980	99245	1	ENSMUSG00000000631	ENSMUST00000108376	0	360013	Myo18a	myosin XVIIIA
17	14960575	14960875	301	*	4.92387	5.34703	4.32254	0.97754	0.0016102	0.0326734	Intron (ENSMUST00000024657/ENSMUSG00000023883, intron 1 of 11)	17	14945009	14961273	16265	2	ENSMUSG00000023883	ENSMUST00000024657	398	72057	Phf10	PHD finger protein 10
8	85021386	85021686	301	*	4.10036	4.64324	3.2197	1.36933	0.0016115	0.0326734	Intron (ENSMUST00000064314/ENSMUSG00000052456, intron 2 of 6)	8	85019848	85024868	5021	2	ENSMUSG00000052456	ENSMUST00000211702	3182	56495	Get3	guided entry of tail-anchored proteins factor 3, ATPase
7	19789941	19790241	301	*	2.99836	3.83936	0.737992	2.96867	0.00161716	0.0327598	Promoter (<=1kb)	7	19778881	19789059	10179	2	ENSMUSG00000040525	ENSMUST00000125050	-882	80794	Cblc	Casitas B-lineage lymphoma c
8	106893707	106894007	301	*	6.96559	7.26495	6.58739	0.634314	0.00161908	0.0327703	Promoter (<=1kb)	8	106893651	106923088	29438	1	ENSMUSG00000041438	ENSMUST00000047629	56	21771	Utp4	UTP4 small subunit processome component
5	120440013	120440313	301	*	3.95484	3.05918	4.50328	-1.47272	0.00162951	0.0329527	Exon (ENSMUST00000031591/ENSMUSG00000029595, exon 5 of 5)	5	120419659	120431767	12109	2	ENSMUSG00000098649	ENSMUST00000185026	-8246	102634302	Gm27199	predicted gene 27199
7	45558610	45558910	301	*	4.40532	4.89223	3.66488	1.17696	0.00163282	0.0329912	Promoter (<=1kb)	7	45559206	45566009	6804	1	ENSMUSG00000030825	ENSMUST00000211029	-296	66065	Hsd17b14	hydroxysteroid (17-beta) dehydrogenase 14
9	20972437	20972737	301	*	4.08746	4.64439	3.16842	1.42106	0.00163934	0.0330784	Intron (ENSMUST00000054197/ENSMUSG00000043895, intron 1 of 1)	9	20968249	20973978	5730	2	ENSMUSG00000043895	ENSMUST00000216499	1241	14739	S1pr2	sphingosine-1-phosphate receptor 2
12	81019623	81019923	301	*	3.77377	4.4372	2.50896	1.8631	0.00163997	0.0330784	Distal Intergenic	12	81026808	81186414	159607	1	ENSMUSG00000021136	ENSMUST00000110347	-6885	64075	Smoc1	SPARC related modular calcium binding 1
12	111423758	111424058	301	*	4.29621	3.58566	4.77017	-1.21843	0.00164451	0.0331413	Exon (ENSMUST00000222126/ENSMUSG00000021280, exon 5 of 5)	12	111421561	111431182	9622	1	ENSMUSG00000021280	ENSMUST00000222897	2197	74190	Exoc3l4	exocyst complex component 3-like 4
7	16158874	16159174	301	*	4.73536	4.14276	5.1542	-1.04868	0.00164607	0.0331438	Exon (ENSMUST00000211649/ENSMUSG00000030376, exon 10 of 10)	7	16175090	16178793	3704	1	ENSMUSG00000041420	ENSMUST00000176342	-15916	17537	Meis3	Meis homeobox 3
11	50602126	50602426	301	*	5.37596	5.75653	4.85753	0.853678	0.00164774	0.0331438	Promoter (<=1kb)	11	50599298	50602448	3151	2	ENSMUSG00000085564	ENSMUST00000154068	22
7	39544522	39544822	301	*	4.11536	4.66356	3.22032	1.38893	0.00165009	0.0331438	Promoter (<=1kb)	7	39542537	39544906	2370	2	ENSMUSG00000104150	ENSMUST00000191753	84
8	125995410	125995710	301	*	6.0002	6.3275	5.57617	0.707295	0.00165068	0.0331438	Promoter (<=1kb)	8	125995436	126030683	35248	1	ENSMUSG00000033998	ENSMUST00000212831	0	16525	Kcnk1	potassium channel, subfamily K, member 1
2	168961139	168961439	301	*	3.8602	4.50308	2.67104	1.76976	0.00165173	0.0331438	Distal Intergenic	2	168893331	168955587	62257	2	ENSMUSG00000027551	ENSMUST00000109162	-5552	22722	Zfp64	zinc finger protein 64
11	62503008	62503308	301	*	3.08157	3.901	0.994046	2.79024	0.0016541	0.033163	Intron (ENSMUST00000014389/ENSMUSG00000014245, intron 2 of 6)	11	62522741	62523542	802	1	ENSMUSG00000086636	ENSMUST00000143382	-19433
8	94666727	94667027	301	*	6.36093	6.6714	5.96479	0.662974	0.00165767	0.0331752	Promoter (<=1kb)	8	94666864	94673160	6297	1	ENSMUSG00000031776	ENSMUST00000211858	0	107566	Arl2bp	ADP-ribosylation factor-like 2 binding protein
8	74993836	74994136	301	*	5.86027	6.20506	5.40629	0.754472	0.00165947	0.0331752	Intron (ENSMUST00000041759/ENSMUSG00000034518, intron 1 of 10)	8	74993712	75000784	7073	1	ENSMUSG00000034518	ENSMUST00000133585	124	70823	Hmgxb4	HMG box domain containing 4
8	70283125	70283425	301	*	6.63783	6.93562	6.26214	0.630073	0.00166032	0.0331752	Promoter (<=1kb)	8	70283034	70286302	3269	1	ENSMUSG00000003573	ENSMUST00000155711	91	26558	Homer3	homer scaffolding protein 3
19	6365715	6366015	301	*	3.25135	4.0331	1.41886	2.51771	0.00166039	0.0331752	Exon (ENSMUST00000131252/ENSMUSG00000024949, exon 2 of 13)	19	6364557	6372619	8063	1	ENSMUSG00000024949	ENSMUST00000155973	1158	22668	Sf1	splicing factor 1
2	120076086	120076386	301	*	4.27214	3.5438	4.75385	-1.24361	0.00166456	0.0332299	Exon (ENSMUST00000156159/ENSMUSG00000074899, exon 11 of 66)	2	120041493	120085678	44186	2	ENSMUSG00000074899	ENSMUST00000156159	9292	640524	Sptbn5	spectrin beta, non-erythrocytic 5
7	27658072	27658372	301	*	4.36732	3.66299	4.83853	-1.20994	0.00166717	0.0332464	Exon (ENSMUST00000036453/ENSMUSG00000040390, exon 9 of 10)	7	27653915	27657346	3432	1	ENSMUSG00000007944	ENSMUST00000008088	4157	73032	Ttc9b	tetratricopeptide repeat domain 9B
12	113187831	113188131	301	*	5.00019	4.46157	5.39148	-0.968444	0.00166898	0.0332464	5' UTR	12	113185930	113189523	3594	1	ENSMUSG00000049036	ENSMUST00000058491	1901	69195	Tmem121	transmembrane protein 121
2	129247301	129247601	301	*	3.68282	4.34793	2.41158	1.86976	0.00166965	0.0332464	Intron (ENSMUST00000141964/ENSMUSG00000085485, intron 1 of 2)	2	129246376	129268526	22151	1	ENSMUSG00000085485	ENSMUST00000141964	925
19	42384718	42385018	301	*	2.87741	3.73973	0.419769	3.16367	0.00167295	0.0332837	Intron (ENSMUST00000238290/ENSMUSG00000042401, intron 2 of 14)	19	42378991	42379101	111	2	ENSMUSG00000117706	ENSMUST00000237236	-5617
8	71525441	71525741	301	*	4.9684	5.41482	4.31855	1.0491	0.00167492	0.0332893	Promoter (<=1kb)	8	71520120	71525711	5592	2	ENSMUSG00000108900	ENSMUST00000207913	0	619297	Ccdc194	coiled-coil domain containing 194
8	107109059	107109359	301	*	4.65261	5.11391	3.9704	1.0949	0.00167608	0.0332893	Distal Intergenic	8	107119110	107119892	783	1	ENSMUSG00000102271	ENSMUST00000193420	-9751
18	60821578	60821878	301	*	3.94967	4.53924	2.93578	1.5457	0.00167781	0.0332953	Exon (ENSMUST00000175934/ENSMUSG00000024613, exon 19 of 26)	18	60828067	60829027	961	2	ENSMUSG00000024613	ENSMUST00000176088	7149	21453	Tcof1	treacle ribosome biogenesis factor 1
10	87494723	87495023	301	*	3.50219	2.22483	4.1689	-1.95783	0.00168412	0.0333776	Promoter (1-2kb)	10	87490819	87493660	2842	2	ENSMUSG00000020052	ENSMUST00000020243	-1063	17172	Ascl1	achaete-scute family bHLH transcription factor 1
8	105496731	105497031	301	*	6.32539	6.64384	5.91613	0.684013	0.00168482	0.0333776	Promoter (<=1kb)	8	105472423	105496870	24448	2	ENSMUSG00000039199	ENSMUST00000212303	0	70796	Zdhhc1	zinc finger, DHHC domain containing 1
2	152706143	152706443	301	*	4.82487	5.2754	4.16619	1.06149	0.00169536	0.0335416	3' UTR	2	152691839	152696241	4403	1	ENSMUSG00000019188	ENSMUST00000129439	14304	14950	H13	histocompatibility 13
8	84987043	84987343	301	*	3.52695	4.25292	1.99574	2.18038	0.00169596	0.0335416	Promoter (3-4kb)	8	84990603	85003343	12741	1	ENSMUSG00000052566	ENSMUST00000209764	-3260	170833	Hook2	hook microtubule tethering protein 2
4	44711876	44712176	301	*	3.7197	2.66336	4.32296	-1.68244	0.00171325	0.0338548	Promoter (1-2kb)	4	44524757	44710487	185731	2	ENSMUSG00000014030	ENSMUST00000014174	-1389	18507	Pax5	paired box 5
8	46471193	46471493	301	*	6.473	6.77211	6.09522	0.633367	0.00171606	0.0338818	Promoter (<=1kb)	8	46471183	46534684	63502	1	ENSMUSG00000018796	ENSMUST00000210929	10	14081	Acsl1	acyl-CoA synthetase long-chain family member 1
12	8673703	8674003	301	*	3.85483	2.87389	4.43339	-1.58553	0.00171941	0.033919	Promoter (<=1kb)	12	8674134	8751454	77321	1	ENSMUSG00000020594	ENSMUST00000111123	-131	80913	Pum2	pumilio RNA-binding family member 2
8	107031446	107031746	301	*	6.89602	7.187	6.53114	0.612605	0.00172299	0.0339612	5' UTR	8	107031222	107045755	14534	1	ENSMUSG00000031913	ENSMUST00000034388	224	116733	Vps4a	vacuolar protein sorting 4A
8	69088782	69089082	301	*	6.46581	6.77297	6.07506	0.654361	0.00172649	0.0340013	Promoter (<=1kb)	8	69088787	69102249	13463	1	ENSMUSG00000006273	ENSMUST00000153680	0	11966	Atp6v1b2	ATPase, H+ transporting, lysosomal V1 subunit B2
13	78194883	78195183	301	*	4.059	3.22002	4.58604	-1.3965	0.00172997	0.0340218	Exon (ENSMUST00000091458/ENSMUSG00000069171, exon 2 of 3)	13	78189733	78196373	6641	2	ENSMUSG00000069171	ENSMUST00000125176	1190	13865	Nr2f1	nuclear receptor subfamily 2, group F, member 1
8	109692857	109693157	301	*	6.30072	6.62067	5.88899	0.687957	0.00173044	0.0340218	Promoter (<=1kb)	8	109671328	109693247	21920	2	ENSMUSG00000031729	ENSMUST00000212562	90	71955	Ist1	increased sodium tolerance 1 homolog (yeast)
17	36993804	36994104	301	*	3.2273	4.03561	1.22064	2.70927	0.00173683	0.0341188	Promoter (4-5kb)	17	36984061	36989537	5477	2	ENSMUSG00000024459	ENSMUST00000145260	-4267	240095	H2-M5	histocompatibility 2, M region locus 5
3	102168117	102168417	301	*	3.14146	3.9378	1.21633	2.61646	0.00174406	0.034232	Promoter (1-2kb)	3	102163186	102166973	3788	2	ENSMUSG00000027860	ENSMUST00000160226	-1144	229658	Vangl1	VANGL planar cell polarity 1
10	20400217	20400517	301	*	4.05878	3.22022	4.58564	-1.39591	0.00175583	0.0344339	3' UTR	10	20365010	20365437	428	2	ENSMUSG00000111351	ENSMUST00000213596	-34780
15	76617554	76617854	301	*	2.99098	3.8318	0.732142	2.96689	0.00175953	0.0344775	Promoter (<=1kb)	15	76612391	76617384	4994	2	ENSMUSG00000063354	ENSMUST00000230977	-170	72027	Slc39a4	solute carrier family 39 (zinc transporter), member 4
2	157561506	157561806	301	*	3.50111	4.1957	2.11118	2.01141	0.0017638	0.0345323	3' UTR	2	157561009	157561855	847	1	ENSMUSG00000067786	ENSMUST00000134513	497	18111	Nnat	neuronatin
5	125393395	125393695	301	*	3.87664	4.48196	2.81378	1.60864	0.00176608	0.034548	Promoter (3-4kb)	5	125385977	125390202	4226	2	ENSMUSG00000008348	ENSMUST00000156249	-3193	22190	Ubc	ubiquitin C
17	91088219	91088519	301	*	4.22125	3.45724	4.71812	-1.29365	0.00177126	0.0346022	Promoter (<=1kb)	17	90535206	91088483	553278	2	ENSMUSG00000024109	ENSMUST00000161637	0	18189	Nrxn1	neurexin I
2	25290577	25290877	301	*	4.82512	4.24893	5.23575	-1.02452	0.00177181	0.0346022	Promoter (<=1kb)	2	25291220	25298925	7706	1	ENSMUSG00000085830	ENSMUST00000129723	-343	320354	Grin1os	glutamate receptor, ionotropic, NMDA1 (zeta 1), opposite strand
1	86357454	86357754	301	*	4.84086	5.27161	4.22396	1.00031	0.00178093	0.0347513	Promoter (1-2kb)	1	86356261	86356330	70	2	ENSMUSG00000064823	ENSMUST00000082889	-1124	80828	Snord82	small nucleolar RNA, C/D box 82
7	25755337	25755637	301	*	5.19663	5.62662	4.5813	0.999033	0.00178795	0.0348591	Promoter (<=1kb)	7	25721165	25754757	33593	2	ENSMUSG00000040725	ENSMUST00000206832	-580	232989	Hnrnpul1	heterogeneous nuclear ribonucleoprotein U-like 1
12	116077737	116078037	301	*	4.34497	3.66194	4.80665	-1.17925	0.00179283	0.0349245	Promoter (<=1kb)	12	116077760	116098382	20623	1	ENSMUSG00000011171	ENSMUST00000100988	0	22355	Vipr2	vasoactive intestinal peptide receptor 2
8	71485688	71485988	301	*	5.70147	6.04619	5.24762	0.754074	0.00179545	0.0349245	Promoter (<=1kb)	8	71476019	71485963	9945	2	ENSMUSG00000034863	ENSMUST00000093450	0	382014	Ano8	anoctamin 8
2	18047642	18047942	301	*	5.22845	5.62538	4.67903	0.900551	0.00179579	0.0349245	Exon (ENSMUST00000091420/ENSMUSG00000054074, exon 2 of 2)	2	18045253	18048449	3197	2	ENSMUSG00000054074	ENSMUST00000066885	507	72668	Skida1	SKI/DACH domain containing 1
8	70608058	70608358	301	*	6.0728	6.39222	5.66193	0.686376	0.00180455	0.0350657	Promoter (<=1kb)	8	70597490	70608314	10825	2	ENSMUSG00000070003	ENSMUST00000049908	0	76900	Ssbp4	single stranded DNA binding protein 4
4	108118217	108118517	301	*	4.73683	5.16994	4.11501	1.00719	0.00180935	0.0351296	Promoter (<=1kb)	4	108044835	108118476	73642	2	ENSMUSG00000028603	ENSMUST00000135379	0	20280	Scp2	sterol carrier protein 2, liver
15	79972532	79972832	301	*	3.50391	4.19777	2.11706	2.00765	0.00181575	0.0352246	Promoter (1-2kb)	15	79918417	79971119	52703	2	ENSMUSG00000053411	ENSMUST00000128931	-1413	52609	Cbx7	chromobox 7
6	60828668	60828968	301	*	3.73455	2.58787	4.36527	-1.79842	0.00181781	0.0352354	Promoter (<=1kb)	6	60814691	60828872	14182	2	ENSMUSG00000025889	ENSMUST00000203177	0	20617	Snca	synuclein, alpha
2	152181669	152181969	301	*	2.77562	3.66634	0	3.47184	0.00182397	0.0353157	Distal Intergenic	2	152185291	152185682	392	2	ENSMUSG00000081087	ENSMUST00000117430	3713	100043843	Rps15a-ps7	ribosomal protein S15A, pseudogene 7
5	137116044	137116344	301	*	3.82539	2.8104	4.41532	-1.62992	0.00182501	0.0353157	Promoter (<=1kb)	5	137105644	137116207	10564	2	ENSMUSG00000043279	ENSMUST00000054384	0	384309	Trim56	tripartite motif-containing 56
12	113140323	113140623	301	*	5.0934	4.56558	5.47899	-0.952263	0.00182649	0.0353157	Promoter (<=1kb)	12	113140572	113145103	4532	1	ENSMUSG00000006356	ENSMUST00000200380	0	68337	Crip2	cysteine rich protein 2
10	61381405	61381705	301	*	3.66186	4.32234	2.40825	1.84762	0.00182812	0.0353179	Intron (ENSMUST00000020289/ENSMUSG00000020092, intron 1 of 19)	10	61350950	61381993	31044	2	ENSMUSG00000020092	ENSMUST00000219132	288	27355	Pald1	phosphatase domain containing, paladin 1
6	48048554	48048854	301	*	5.50799	5.87434	5.01573	0.813652	0.00183037	0.0353322	Promoter (<=1kb)	6	48048703	48048795	93	1	ENSMUSG00000092928	ENSMUST00000175187	0
4	136144128	136144428	301	*	5.63023	5.99171	5.14678	0.800196	0.00183677	0.0354161	3' UTR	4	136143864	136144716	853	1	ENSMUSG00000007872	ENSMUST00000151001	264	15903	Id3	inhibitor of DNA binding 3
12	105684726	105685026	301	*	6.15979	5.81609	6.43717	-0.662474	0.00183775	0.0354161	Promoter (<=1kb)	12	105684829	105699151	14323	1	ENSMUSG00000044715	ENSMUST00000222284	0	66787	Gskip	GSK3B interacting protein
4	88722049	88722349	301	*	5.68347	6.03219	5.22265	0.764995	0.00184659	0.0355571	5' UTR	4	88718292	88722465	4174	2	ENSMUSG00000070923	ENSMUST00000094993	116	242521	Klhl9	kelch-like 9
4	156189318	156189618	301	*	3.71802	4.34574	2.58158	1.7012	0.00185012	0.0355958	Promoter (3-4kb)	4	156165294	156186107	20814	2	ENSMUSG00000041936	ENSMUST00000181062	-3211	11603	Agrn	agrin
13	23424831	23425131	301	*	4.08636	3.27343	4.60316	-1.3608	0.00186207	0.0357962	Promoter (<=1kb)	13	23418361	23423866	5506	2	ENSMUSG00000036376	ENSMUST00000041782	-965	30946	Abt1	activator of basal transcription 1
8	84857054	84857354	301	*	6.56874	6.86397	6.19713	0.623404	0.00187368	0.0359897	Promoter (<=1kb)	8	84857020	84869256	12237	1	ENSMUSG00000003808	ENSMUST00000156970	34	66590	Farsa	phenylalanyl-tRNA synthetase, alpha subunit
17	74272657	74272957	301	*	3.62473	4.27282	2.41686	1.78989	0.00188197	0.0361084	Intron (ENSMUST00000233514/ENSMUSG00000058704, intron 1 of 8)	17	74200702	74288648	87947	2	ENSMUSG00000058704	ENSMUST00000233422	15691	76890	Memo1	mediator of cell motility 1
8	89028482	89028782	301	*	4.22036	4.76809	3.3266	1.38796	0.00188295	0.0361084	Exon (ENSMUST00000034090/ENSMUSG00000031665, exon 4 of 4)	8	89024735	89024831	97	1	ENSMUSG00000099078	ENSMUST00000183771	3747	102465899	Mir8110	microRNA 8110
12	112678944	112679244	301	*	4.79189	4.22475	5.19793	-1.01085	0.00188883	0.0361544	Promoter (<=1kb)	12	112678878	112679970	1093	1	ENSMUSG00000037638	ENSMUST00000173942	66	382639	Zbtb42	zinc finger and BTB domain containing 42
2	118430982	118431282	301	*	3.77278	2.73791	4.36918	-1.65524	0.00188911	0.0361544	Exon (ENSMUST00000005233/ENSMUSG00000005102, exon 12 of 39)	2	118438842	118452290	13449	1	ENSMUSG00000005102	ENSMUST00000110869	-7560	27103	Eif2ak4	eukaryotic translation initiation factor 2 alpha kinase 4
1	89867599	89867899	301	*	3.20005	3.97454	1.41123	2.46714	0.00188999	0.0361544	Intron (ENSMUST00000027521/ENSMUSG00000055013, intron 16 of 17)	1	89825481	89827525	2045	1	ENSMUSG00000103252	ENSMUST00000193177	42118
19	46059601	46059901	301	*	4.07222	4.62281	3.17067	1.39735	0.00189312	0.0361846	Intron (ENSMUST00000134015/ENSMUSG00000055491, intron 1 of 2)	19	46057259	46062644	5386	1	ENSMUSG00000055491	ENSMUST00000147640	2342	226169	Pprc1	peroxisome proliferative activated receptor, gamma, coactivator-related 1
9	44698092	44698392	301	*	3.73704	2.65861	4.34723	-1.71128	0.00189482	0.0361875	Promoter (<=1kb)	9	44687634	44697845	10212	2	ENSMUSG00000048537	ENSMUST00000129806	-247	102693	Phldb1	pleckstrin homology like domain, family B, member 1
5	129156486	129156786	301	*	3.17356	3.97218	1.23326	2.63392	0.00190923	0.0364329	Intron (ENSMUST00000056617/ENSMUSG00000044017, intron 14 of 25)	5	129128077	129128517	441	2	ENSMUSG00000060419	ENSMUST00000140155	-27969
8	84429671	84429971	301	*	3.34289	4.08509	1.73151	2.26931	0.0019135	0.0364525	Intron (ENSMUST00000238701/ENSMUSG00000034656, intron 3 of 48)	8	84415784	84640246	224463	1	ENSMUSG00000034656	ENSMUST00000215756	13887	12286	Cacna1a	calcium channel, voltage-dependent, P/Q type, alpha 1A subunit
11	75400163	75400463	301	*	3.25012	4.03278	1.41203	2.52412	0.00191516	0.0364525	Exon (ENSMUST00000044530/ENSMUSG00000018809, exon 7 of 11)	11	75399609	75400633	1025	1	ENSMUSG00000018809	ENSMUST00000135774	554	319822	Smyd4	SET and MYND domain containing 4
11	104287290	104287590	301	*	3.9863	4.54569	3.06041	1.42935	0.00191846	0.0364525	Intron (ENSMUST00000106992/ENSMUSG00000018411, intron 2 of 9)	11	104282381	104328187	45807	1	ENSMUSG00000018411	ENSMUST00000106989	4909	17762	Mapt	microtubule-associated protein tau
18	74064477	74064777	301	*	5.23684	5.62707	4.70026	0.881098	0.00192054	0.0364525	Promoter (<=1kb)	18	73928486	74064392	135907	2	ENSMUSG00000024558	ENSMUST00000162863	-85	225724	Mapk4	mitogen-activated protein kinase 4
9	35561187	35561487	301	*	3.31742	4.05381	1.7353	2.23452	0.00192085	0.0364525	Exon (ENSMUST00000115110/ENSMUSG00000050555, exon 4 of 4)	9	35559466	35566839	7374	1	ENSMUSG00000032103	ENSMUST00000121246	1721	67049	Pus3	pseudouridine synthase 3
8	87958556	87958856	301	*	6.18513	6.50408	5.77503	0.685228	0.00192192	0.0364525	Intron (ENSMUST00000109655/ENSMUSG00000045333, intron 1 of 7)	8	87661810	87959595	297786	2	ENSMUSG00000045333	ENSMUST00000109655	739	94187	Zfp423	zinc finger protein 423
1	171258808	171259108	301	*	3.62009	2.22748	4.31531	-2.10066	0.00192214	0.0364525	Exon (ENSMUST00000111315/ENSMUSG00000006403, exon 9 of 9)	1	171252116	171260637	8522	1	ENSMUSG00000006403	ENSMUST00000111314	6692	240913	Adamts4	a disintegrin-like and metallopeptidase (reprolysin type) with thrombospondin type 1 motif, 4
5	119680574	119680874	301	*	5.04564	5.44938	4.48301	0.920038	0.00192274	0.0364525	Exon (ENSMUST00000079719/ENSMUSG00000018604, exon 6 of 7)	5	119680249	119680832	584	1	ENSMUSG00000018604	ENSMUST00000154680	325	21386	Tbx3	T-box 3
12	110844785	110845085	301	*	4.78048	4.22111	5.18255	-0.999138	0.00192629	0.0364626	Exon (ENSMUST00000180988/ENSMUSG00000097832, exon 1 of 2)	12	110842276	110845216	2941	2	ENSMUSG00000097832	ENSMUST00000180988	131
15	89425488	89425788	301	*	2.69423	0	3.57858	-3.46768	0.0019264	0.0364626	Promoter (<=1kb)	15	89424836	89425795	960	2	ENSMUSG00000078937	ENSMUST00000168376	7	12895	Cpt1b	carnitine palmitoyltransferase 1b, muscle
5	27049530	27049830	301	*	4.29987	3.58608	4.77524	-1.22307	0.0019412	0.0367131	5' UTR	5	27049393	27052130	2738	1	ENSMUSG00000061576	ENSMUST00000200274	137	13483	Dpp6	dipeptidylpeptidase 6
10	77150732	77151032	301	*	2.96883	3.80743	0.728816	2.94602	0.00195746	0.0369906	Intron (ENSMUST00000081654/ENSMUSG00000001435, intron 2 of 41)	10	77137100	77137952	853	1	ENSMUSG00000112612	ENSMUST00000218871	13632
4	152096751	152097051	301	*	4.97888	5.39323	4.39531	0.95124	0.0019675	0.0371503	Promoter (<=1kb)	4	152096719	152115400	18682	1	ENSMUSG00000039713	ENSMUST00000084115	32	269608	Plekhg5	pleckstrin homology domain containing, family G (with RhoGef domain) member 5
10	68132845	68133145	301	*	3.98501	4.54558	3.05578	1.43385	0.00197086	0.0371837	Intron (ENSMUST00000219238/ENSMUSG00000019947, intron 5 of 9)	10	68096454	68136626	40173	2	ENSMUSG00000019947	ENSMUST00000218532	3481	71371	Arid5b	AT rich interactive domain 5B (MRF1-like)
1	74855165	74855465	301	*	5.85886	6.19139	5.42598	0.72119	0.00198158	0.0373557	Exon (ENSMUST00000160379/ENSMUSG00000090071, exon 1 of 1)	1	74854934	74857732	2799	1	ENSMUSG00000090071	ENSMUST00000160379	231	12570	Cdk5r2	cyclin-dependent kinase 5, regulatory subunit 2 (p39)
17	31520124	31520424	301	*	5.77714	6.10884	5.34568	0.718855	0.00199632	0.0376032	Promoter (<=1kb)	17	31520150	31529398	9249	1	ENSMUSG00000024038	ENSMUST00000189436	0	78330	Ndufv3	NADH:ubiquinone oxidoreductase core subunit V3
9	21038468	21038768	301	*	3.22646	1.5792	3.97557	-2.3904	0.00200058	0.0376531	Promoter (<=1kb)	9	21034290	21037782	3493	2	ENSMUSG00000097535	ENSMUST00000180870	-686
8	70527381	70527681	301	*	5.57141	5.93911	5.0767	0.817536	0.0020077	0.0377515	Promoter (<=1kb)	8	70527724	70535328	7605	1	ENSMUSG00000019428	ENSMUST00000119353	-43	14232	Fkbp8	FK506 binding protein 8
11	103363098	103363398	301	*	4.68378	5.13103	4.03216	1.05066	0.00200904	0.0377515	Promoter (<=1kb)	11	103363213	103364651	1439	1	ENSMUSG00000085733	ENSMUST00000130556	0
8	126970657	126970957	301	*	6.83229	7.11697	6.47728	0.596421	0.00201239	0.0377815	Promoter (<=1kb)	8	126963836	126971049	7214	2	ENSMUSG00000033931	ENSMUST00000212583	92	52202	Rbm34	RNA binding motif protein 34
7	19692198	19692498	301	*	4.53151	5.02696	3.77088	1.20614	0.00201387	0.0377815	Promoter (<=1kb)	7	19692221	19692491	271	2	ENSMUSG00000040564	ENSMUST00000207500	0	11812	Apoc1	apolipoprotein C-I
17	56427863	56428163	301	*	4.57466	3.97046	4.99923	-1.06527	0.00201593	0.0377897	Promoter (<=1kb)	17	56423394	56427994	4601	2	ENSMUSG00000013236	ENSMUST00000224777	0	19280	Ptprs	protein tyrosine phosphatase, receptor type, S
2	153239805	153240105	301	*	3.7339	4.39051	2.49477	1.83077	0.00202483	0.0379261	Intron (ENSMUST00000056924/ENSMUSG00000051413, intron 1 of 2)	2	153227759	153241426	13668	2	ENSMUSG00000051413	ENSMUST00000056924	1321	54711	Plagl2	pleiomorphic adenoma gene-like 2
17	46460789	46461089	301	*	4.27177	4.77111	3.5018	1.21781	0.00202757	0.0379454	Exon (ENSMUST00000225808/ENSMUSG00000015599, exon 13 of 13)	17	46476507	46477659	1153	1	ENSMUSG00000114244	ENSMUST00000224870	-15418
11	8602984	8603284	301	*	3.22343	4.00229	1.40855	2.49729	0.00202926	0.0379454	Intron (ENSMUST00000239091/ENSMUSG00000020422, intron 2 of 30)	11	8431652	8624887	193236	2	ENSMUSG00000020422	ENSMUST00000239091	21603	319939	Tns3	tensin 3
8	116993100	116993400	301	*	6.29193	6.59988	5.8999	0.656297	0.00203073	0.0379454	Exon (ENSMUST00000040484/ENSMUSG00000034424, exon 1 of 5)	8	116981810	116993537	11728	2	ENSMUSG00000034424	ENSMUST00000040484	137	68133	Gcsh	glycine cleavage system protein H (aminomethyl carrier)
4	141136286	141136586	301	*	3.45328	4.18991	1.86998	2.23961	0.00203655	0.0380021	Intron (ENSMUST00000148204/ENSMUSG00000040842, intron 1 of 3)	4	141113001	141139727	26727	2	ENSMUSG00000040842	ENSMUST00000148204	3141	213491	Szrd1	SUZ RNA binding domain containing 1
17	29519341	29519641	301	*	3.47987	4.19687	1.99077	2.12962	0.00203702	0.0380021	Exon (ENSMUST00000234305/ENSMUSG00000091614, exon 5 of 5)	17	29519281	29519790	510	2	ENSMUSG00000091614	ENSMUST00000168877	149	71138	Tmem217	transmembrane protein 217
17	35555237	35555537	301	*	5.03713	5.43755	4.48098	0.910256	0.00203952	0.0380141	Exon (ENSMUST00000044804/ENSMUSG00000039518, exon 2 of 2)	17	35552128	35557180	5053	1	ENSMUSG00000039518	ENSMUST00000044804	3109	386463	Cdsn	corneodesmosin
6	86471927	86472227	301	*	4.42396	4.92137	3.65865	1.21217	0.00204091	0.0380141	3' UTR	6	86464040	86469947	5908	1	ENSMUSG00000046679	ENSMUST00000148768	7887	232196	C87436	expressed sequence C87436
8	57491683	57491983	301	*	4.27312	4.77182	3.50471	1.21561	0.00204563	0.0380714	Intron (ENSMUST00000180690/ENSMUSG00000096917, intron 2 of 2)	8	57488054	57508877	20824	1	ENSMUSG00000096917	ENSMUST00000180690	3629	78353	2500002B13Rik	RIKEN cDNA 2500002B13 gene
15	102954747	102955047	301	*	3.9707	3.11399	4.50455	-1.41999	0.00204972	0.0380893	Exon (ENSMUST00000001701/ENSMUSG00000001656, exon 1 of 2)	15	102954427	102957708	3282	1	ENSMUSG00000001656	ENSMUST00000001701	320	109663	Hoxc11	homeobox C11
3	121206781	121207081	301	*	3.58542	4.24839	2.32237	1.85793	0.00204985	0.0380893	3' UTR	3	121228378	121231533	3156	2	ENSMUSG00000028132	ENSMUST00000200402	24452	99887	Tlcd4	TLC domain containing 4
8	78820796	78821096	301	*	6.18806	6.49868	5.79168	0.663227	0.00205574	0.0381685	Promoter (<=1kb)	8	78804865	78821140	16276	2	ENSMUSG00000031683	ENSMUST00000130325	44	78651	Lsm6	LSM6 homolog, U6 small nuclear RNA and mRNA degradation associated
12	89260083	89260383	301	*	3.5486	2.32592	4.20076	-1.89096	0.00205992	0.0382156	Promoter (4-5kb)	12	89253452	89255361	1910	2	ENSMUSG00000103136	ENSMUST00000194420	-4722
8	94899110	94899410	301	*	4.69158	5.13022	4.05822	1.02401	0.00206731	0.0383224	Distal Intergenic	8	94913565	94917521	3957	2	ENSMUSG00000063605	ENSMUST00000162020	18111	234582	Ccdc102a	coiled-coil domain containing 102A
4	135175383	135175683	301	*	4.69078	4.11684	5.10028	-1.02069	0.00207881	0.0385049	Exon (ENSMUST00000056977/ENSMUSG00000070691, exon 6 of 6)	4	135154436	135155342	907	1	ENSMUSG00000070691	ENSMUST00000127109	20947	12399	Runx3	runt related transcription factor 3
8	43178296	43178596	301	*	4.34707	4.8431	3.58504	1.20711	0.00209051	0.0386911	Promoter (1-2kb)	8	43180541	43193864	13324	1	ENSMUSG00000091490	ENSMUST00000209200	-1945	622117	Triml2	tripartite motif family-like 2
8	85037973	85038273	301	*	6.60389	6.90782	6.21836	0.646003	0.00209714	0.038783	Exon (ENSMUST00000210576/ENSMUSG00000031691, exon 1 of 22)	8	85037717	85057580	19864	1	ENSMUSG00000031691	ENSMUST00000210576	256	212999	Tnpo2	transportin 2 (importin 3, karyopherin beta 2b)
11	55077993	55078293	301	*	3.3498	1.7433	4.09103	-2.34692	0.00210498	0.0388972	Promoter (<=1kb)	11	55049731	55078107	28377	2	ENSMUSG00000049588	ENSMUST00000055040	0	52570	Ccdc69	coiled-coil domain containing 69
7	25816328	25816628	301	*	5.05192	5.44966	4.50094	0.902498	0.00211581	0.0390139	Promoter (<=1kb)	7	25804148	25816558	12411	2	ENSMUSG00000040703	ENSMUST00000152560	0	74134	Cyp2s1	cytochrome P450, family 2, subfamily s, polypeptide 1
8	66486112	66486412	301	*	6.33852	6.64062	5.95593	0.641075	0.0021161	0.0390139	Promoter (<=1kb)	8	66474330	66486497	12168	2	ENSMUSG00000025591	ENSMUST00000143972	85	66282	Tma16	translation machinery associated 16
5	143732095	143732395	301	*	5.13654	5.52438	4.60449	0.873984	0.00211631	0.0390139	Promoter (<=1kb)	5	143710325	143732280	21956	2	ENSMUSG00000051306	ENSMUST00000053287	0	76800	Usp42	ubiquitin specific peptidase 42
7	143007536	143007836	301	*	4.19474	4.73635	3.31749	1.36543	0.00212785	0.0391957	Exon (ENSMUST00000207449/ENSMUSG00000000244, exon 1 of 1)	7	142988969	143008033	19065	2	ENSMUSG00000052281	ENSMUST00000131740	197
7	28732524	28732824	301	*	5.14283	5.53415	4.60418	0.884041	0.00212968	0.0391985	Promoter (<=1kb)	7	28732500	28737482	4983	1	ENSMUSG00000030598	ENSMUST00000167118	24	50760	Fbxo17	F-box protein 17
6	124476580	124476880	301	*	4.45058	4.9425	3.69834	1.19391	0.00214297	0.0394087	Distal Intergenic	6	124466765	124470598	3834	1	ENSMUSG00000118414	ENSMUST00000238756	9815
19	38064738	38065038	301	*	3.24644	3.99859	1.58305	2.32629	0.00214447	0.0394087	Intron (ENSMUST00000236044/ENSMUSG00000024989, intron 5 of 9)	19	38071929	38072053	125	1	ENSMUSG00000064646	ENSMUST00000082712	-6891	115489089	Gm23300	predicted gene, 23300
3	49756944	49757244	301	*	3.6011	2.3217	4.26833	-1.96226	0.00215027	0.0394841	Promoter (<=1kb)	3	49754826	49757283	2458	2	ENSMUSG00000037892	ENSMUST00000195086	39	73173	Pcdh18	protocadherin 18
8	76899152	76899452	301	*	5.35202	5.7199	4.85698	0.817687	0.0021526	0.0394959	Promoter (<=1kb)	8	76899442	76908413	8972	1	ENSMUSG00000031618	ENSMUST00000143284	0	110784	Nr3c2	nuclear receptor subfamily 3, group C, member 2
8	87662999	87663299	301	*	4.79991	5.22337	4.19796	0.978063	0.00215956	0.0395762	Intron (ENSMUST00000165770/ENSMUSG00000045333, intron 5 of 5)	8	87636657	87637013	357	1	ENSMUSG00000089301	ENSMUST00000158676	26342
9	76323423	76323723	301	*	3.97015	3.11598	4.50303	-1.4165	0.00216037	0.0395762	Promoter (<=1kb)	9	76225880	76323611	97732	2	ENSMUSG00000032360	ENSMUST00000063140	0	387285	Hcrtr2	hypocretin (orexin) receptor 2
6	120275490	120275790	301	*	3.00531	3.84742	0.735311	2.97931	0.00216435	0.0396182	Intron (ENSMUST00000057283/ENSMUSG00000041372, intron 1 of 19)	6	120203094	120294559	91466	2	ENSMUSG00000041372	ENSMUST00000057283	18769	330406	B4galnt3	beta-1,4-N-acetyl-galactosaminyl transferase 3
4	80911231	80911531	301	*	5.57901	5.92966	5.1148	0.770151	0.00218116	0.039873	5' UTR	4	80910646	80955628	44983	1	ENSMUSG00000048706	ENSMUST00000055922	585	52829	Lurap1l	leucine rich adaptor protein 1-like
8	70897016	70897316	301	*	6.53295	6.82586	6.16503	0.617381	0.00218169	0.039873	Promoter (<=1kb)	8	70895383	70897283	1901	2	ENSMUSG00000045128	ENSMUST00000212709	0	76808	Rpl18a	ribosomal protein L18A
11	46166294	46166594	301	*	4.97648	4.46086	5.35555	-0.933323	0.00218354	0.0398756	Promoter (<=1kb)	11	46148155	46166508	18354	2	ENSMUSG00000020411	ENSMUST00000020679	0	214112	Nipal4	NIPA-like domain containing 4
12	118846748	118847048	301	*	4.80684	4.27161	5.19636	-0.962735	0.00219139	0.0399876	Intron (ENSMUST00000063918/ENSMUSG00000048562, intron 1 of 2)	12	118846329	118852576	6248	1	ENSMUSG00000048562	ENSMUST00000063918	419	320145	Sp8	trans-acting transcription factor 8
5	112576855	112577155	301	*	4.48147	3.83952	4.92418	-1.12037	0.00219779	0.0400732	Promoter (<=1kb)	5	112419151	112576975	157825	2	ENSMUSG00000058153	ENSMUST00000079491	0	56747	Sez6l	seizure related 6 homolog like
5	64813905	64814205	301	*	3.87795	4.46309	2.87741	1.52736	0.00219997	0.0400817	Intron (ENSMUST00000165536/ENSMUSG00000029178, intron 1 of 5)	5	64812384	64822243	9860	1	ENSMUSG00000029178	ENSMUST00000197879	1521	16599	Klf3	Kruppel-like factor 3 (basic)
8	70716788	70717088	301	*	3.87393	4.46021	2.86994	1.53191	0.00220405	0.0401247	Promoter (1-2kb)	8	70718543	70722632	4090	1	ENSMUSG00000095026	ENSMUST00000179347	-1455	100502950	Gm3336	predicted gene 3336
7	3349742	3350042	301	*	2.58755	3.50477	0	3.81091	0.00221171	0.0402327	Intron (ENSMUST00000092891/ENSMUSG00000069806, intron 4 of 5)	7	3338216	3366899	28684	1	ENSMUSG00000069806	ENSMUST00000203497	11526	81904	Cacng7	calcium channel, voltage-dependent, gamma subunit 7
10	20170689	20170989	301	*	3.27515	4.0334	1.57876	2.36506	0.002218	0.0403158	Promoter (<=1kb)	10	20170780	20172679	1900	1	ENSMUSG00000019996	ENSMUST00000216909	0	17761	Map7	microtubule-associated protein 7
5	74094746	74095046	301	*	5.08081	5.47126	4.54382	0.881373	0.00222904	0.0404572	Exon (ENSMUST00000066220/ENSMUSG00000106943, exon 1 of 1)	5	74093530	74093650	121	1	ENSMUSG00000093355	ENSMUST00000175614	1216	100313943	Snora26	small nucleolar RNA, H/ACA box 26
7	29985985	29986285	301	*	3.75573	4.37095	2.66094	1.64844	0.00222924	0.0404572	Intron (ENSMUST00000148442/ENSMUSG00000074221, intron 2 of 9)	7	29985299	30028282	42984	1	ENSMUSG00000074221	ENSMUST00000146074	686	243905	Zfp568	zinc finger protein 568
17	70924671	70924971	301	*	3.58564	4.27308	2.22564	1.97672	0.00223392	0.0405106	Promoter (<=1kb)	17	70874352	70924996	50645	2	ENSMUSG00000097154	ENSMUST00000180468	25
12	111417329	111417629	301	*	2.90552	0.730003	3.73629	-2.95617	0.00224023	0.0405634	Promoter (<=1kb)	12	111417430	111422145	4716	1	ENSMUSG00000021280	ENSMUST00000220537	0	74190	Exoc3l4	exocyst complex component 3-like 4
17	84181748	84182048	301	*	3.14154	3.93744	1.21924	2.61324	0.00224031	0.0405634	Promoter (3-4kb)	17	84185756	84216056	30301	1	ENSMUSG00000117393	ENSMUST00000234321	-3708
10	80619728	80620028	301	*	3.93866	4.52575	2.93227	1.53579	0.00224674	0.0406484	Promoter (2-3kb)	10	80622838	80640741	17904	1	ENSMUSG00000003345	ENSMUST00000079773	-2810	103236	Csnk1g2	casein kinase 1, gamma 2
8	92855320	92855620	301	*	5.69696	6.038	5.24948	0.744043	0.00225251	0.0407212	Promoter (<=1kb)	8	92855339	92919279	63941	1	ENSMUSG00000033192	ENSMUST00000046290	0	270084	Lpcat2	lysophosphatidylcholine acyltransferase 2
8	61549745	61550045	301	*	5.8336	6.15769	5.41493	0.698575	0.00225738	0.0407778	Exon (ENSMUST00000121200/ENSMUSG00000058056, exon 2 of 12)	8	61525121	61533841	8721	2	ENSMUSG00000058056	ENSMUST00000136825	-15904	72333	Palld	palladin, cytoskeletal associated protein
6	122333053	122333353	301	*	3.4149	4.14229	1.8769	2.18549	0.00226284	0.0408214	3' UTR	6	122332672	122335145	2474	2	ENSMUSG00000040669	ENSMUST00000160863	1792	13619	Phc1	polyhomeotic 1
4	125122532	125122832	301	*	3.14315	3.94026	1.2129	2.62228	0.00226329	0.0408214	Promoter (<=1kb)	4	125120094	125122520	2427	2	ENSMUSG00000042677	ENSMUST00000131685	-12	230738	Zc3h12a	zinc finger CCCH type containing 12A
8	57493588	57493888	301	*	2.83799	3.69662	0.41667	3.12399	0.00227303	0.0409655	Intron (ENSMUST00000180690/ENSMUSG00000096917, intron 2 of 2)	8	57488054	57508877	20824	1	ENSMUSG00000096917	ENSMUST00000180690	5534	78353	2500002B13Rik	RIKEN cDNA 2500002B13 gene
1	181921777	181922077	301	*	3.82715	4.46128	2.66869	1.73054	0.00230596	0.0415173	Exon (ENSMUST00000177811/ENSMUSG00000022995, exon 7 of 15)	1	181919451	181923764	4314	2	ENSMUSG00000022995	ENSMUST00000192967	1687	13800	Enah	ENAH actin regulator
8	27272893	27273193	301	*	3.34719	4.08827	1.74146	2.26266	0.00230721	0.0415173	Intron (ENSMUST00000033880/ENSMUSG00000031490, intron 1 of 2)	8	27279441	27281070	1630	1	ENSMUSG00000109953	ENSMUST00000209427	-6248
13	23299667	23299967	301	*	5.39856	4.96942	5.72888	-0.799564	0.00231558	0.0416358	Intron (ENSMUST00000155432/ENSMUSG00000085488, intron 1 of 1)	13	23298049	23298196	148	1	ENSMUSG00000080698	ENSMUST00000119479	1618
11	45980531	45980831	301	*	4.63429	4.03173	5.05805	-1.06308	0.0023189	0.0416484	Exon (ENSMUST00000049038/ENSMUSG00000040489, exon 1 of 5)	11	45980310	46017994	37685	1	ENSMUSG00000040489	ENSMUST00000049038	221	214105	Sox30	SRY (sex determining region Y)-box 30
6	65063928	65064228	301	*	2.73624	3.62382	0	3.42978	0.00231984	0.0416484	Intron (ENSMUST00000031984/ENSMUSG00000029920, intron 5 of 23)	6	65057614	65074857	17244	1	ENSMUSG00000029920	ENSMUST00000204420	6314	13990	Smarcad1	SWI/SNF-related, matrix-associated actin-dependent regulator of chromatin, subfamily a, containing DEAD/H box 1
1	86063777	86064077	301	*	3.02855	3.84101	0.992327	2.73244	0.0023246	0.0417017	Promoter (<=1kb)	1	86064387	86070776	6390	1	ENSMUSG00000026229	ENSMUST00000147807	-310	70247	Psmd1	proteasome (prosome, macropain) 26S subunit, non-ATPase, 1
8	120668287	120668587	301	*	6.83774	7.12213	6.48317	0.595696	0.00232922	0.0417434	Promoter (<=1kb)	8	120668308	120674032	5725	1	ENSMUSG00000031818	ENSMUST00000181795	0	12857	Cox4i1	cytochrome c oxidase subunit 4I1
3	45381069	45381369	301	*	4.61499	4.00139	5.04414	-1.07933	0.00233105	0.0417434	Promoter (1-2kb)	3	45382633	45432493	49861	1	ENSMUSG00000049100	ENSMUST00000195655	-1264	18526	Pcdh10	protocadherin 10
15	102235977	102236277	301	*	3.67766	4.31596	2.50467	1.74685	0.00233228	0.0417434	Promoter (4-5kb)	15	102215995	102231944	15950	2	ENSMUSG00000001281	ENSMUST00000001327	-4033	16421	Itgb7	integrin beta 7
3	14641677	14641977	301	*	3.83943	2.81159	4.43355	-1.64687	0.00233709	0.0417975	Promoter (<=1kb)	3	14641727	14663002	21276	1	ENSMUSG00000027555	ENSMUST00000029071	0	71934	Car13	carbonic anhydrase 13
19	23092491	23092791	301	*	4.74867	5.19977	4.08874	1.06301	0.00234495	0.0419059	Distal Intergenic	19	22978230	23075924	97695	2	ENSMUSG00000097930	ENSMUST00000236056	-16567
10	62947861	62948161	301	*	2.7007	3.58555	0	3.39413	0.00234707	0.0419117	Intron (ENSMUST00000131422/ENSMUSG00000036875, intron 1 of 20)	10	62947110	62966135	19026	1	ENSMUSG00000036875	ENSMUST00000129785	751	327762	Dna2	DNA replication helicase/nuclease 2
10	63243141	63243441	301	*	4.46016	4.92325	3.774	1.09974	0.00235135	0.041956	Promoter (<=1kb)	10	63243810	63245716	1907	1	ENSMUSG00000020064	ENSMUST00000219856	-369	67345	Herc4	hect domain and RLD 4
12	101017307	101017607	301	*	2.74176	3.62978	0	3.43569	0.00235563	0.0420004	Intron (ENSMUST00000068411/ENSMUSG00000021182, intron 3 of 29)	12	101021673	101021768	96	2	ENSMUSG00000080575	ENSMUST00000116925	4161	100316805	Mir1190	microRNA 1190
17	66479046	66479346	301	*	5.05205	5.44813	4.50429	0.897619	0.00236331	0.0420738	Distal Intergenic	17	66497490	66500319	2830	2	ENSMUSG00000023460	ENSMUST00000155026	20973	19328	Rab12	RAB12, member RAS oncogene family
6	122742955	122743255	301	*	3.03135	3.84379	0.995244	2.73235	0.00236459	0.0420738	Promoter (<=1kb)	6	122739892	122742920	3029	2	ENSMUSG00000003153	ENSMUST00000168801	-35	20527	Slc2a3	solute carrier family 2 (facilitated glucose transporter), member 3
8	80858389	80858689	301	*	3.96783	4.54354	2.99524	1.49147	0.00236515	0.0420738	Intron (ENSMUST00000210676/ENSMUSG00000031714, intron 1 of 10)	8	80879940	80881169	1230	1	ENSMUSG00000109587	ENSMUST00000211421	-21251
11	102946320	102946620	301	*	5.51358	5.86679	5.04485	0.777109	0.00236716	0.0420774	Promoter (<=1kb)	11	102939264	102946688	7425	2	ENSMUSG00000045532	ENSMUST00000057849	68	23829	C1ql1	complement component 1, q subcomponent-like 1
15	102396118	102396418	301	*	3.78878	4.41323	2.66338	1.68804	0.0023812	0.0422947	Distal Intergenic	15	102406143	102408235	2093	1	ENSMUSG00000001280	ENSMUST00000170884	-9725	20683	Sp1	trans-acting transcription factor 1
2	31130569	31130869	301	*	3.02839	3.84013	0.997294	2.7267	0.00239278	0.0424682	Intron (ENSMUST00000073879/ENSMUSG00000075415, intron 1 of 13)	2	31026206	31141802	115597	2	ENSMUSG00000075415	ENSMUST00000073879	10933	14269	Fnbp1	formin binding protein 1
18	61257061	61257361	301	*	2.74338	3.63063	0.00982833	3.42564	0.00240784	0.0427031	Exon (ENSMUST00000025468/ENSMUSG00000024575, exon 12 of 22)	18	61259083	61259961	879	2	ENSMUSG00000091957	ENSMUST00000076842	2600	667279	Rps2-ps10	ribosomal protein S2, pseudogene 10
3	127545427	127545727	301	*	3.69838	2.6633	4.29485	-1.65455	0.00242235	0.0428675	Promoter (<=1kb)	3	127545624	127545689	66	1	ENSMUSG00000065447	ENSMUST00000083513	0	723928	Mir302d	microRNA 302d
10	79708739	79709039	301	*	3.87685	4.50379	2.74306	1.69981	0.00242275	0.0428675	Promoter (<=1kb)	10	79709598	79711969	2372	1	ENSMUSG00000023175	ENSMUST00000105381	-559	12215	Bsg	basigin
8	107436527	107436827	301	*	5.99496	6.31887	5.57662	0.698225	0.00242436	0.0428675	Intron (ENSMUST00000166615/ENSMUSG00000031930, intron 1 of 23)	8	107436416	107483590	47175	1	ENSMUSG00000031930	ENSMUST00000212645	111	66894	Wwp2	WW domain containing E3 ubiquitin protein ligase 2
5	124598740	124599040	301	*	5.42781	4.98569	5.76575	-0.820149	0.00242445	0.0428675	Promoter (<=1kb)	5	124598749	124602080	3332	1	ENSMUSG00000029386	ENSMUST00000140953	0
8	89032537	89032837	301	*	3.14755	3.94437	1.21925	2.62012	0.0024297	0.0428899	Exon (ENSMUST00000034090/ENSMUSG00000031665, exon 3 of 4)	8	89024735	89024831	97	1	ENSMUSG00000099078	ENSMUST00000183771	7802	102465899	Mir8110	microRNA 8110
5	110804589	110804889	301	*	3.17106	3.9712	1.22056	2.64544	0.00243113	0.0428899	Intron (ENSMUST00000031490/ENSMUSG00000029512, intron 3 of 27)	5	110786094	110810053	23960	2	ENSMUSG00000029512	ENSMUST00000200299	5164	22241	Ulk1	unc-51 like kinase 1
12	86829914	86830214	301	*	3.73802	4.34792	2.66052	1.62596	0.00243123	0.0428899	Distal Intergenic	12	86845778	86846467	690	2	ENSMUSG00000113555	ENSMUST00000222765	16253
2	163067250	163067550	301	*	1.93492	2.93492	0	5.93751	0.00243654	0.0429511	Promoter (<=1kb)	2	163068090	163068155	66	1	ENSMUSG00000099091	ENSMUST00000184607	-540	102465607	Mir7003	microRNA 7003
19	45737056	45737356	301	*	4.2231	3.46267	4.71846	-1.28859	0.00244489	0.0430659	Exon (ENSMUST00000026240/ENSMUSG00000025219, exon 6 of 6)	19	45736971	45742684	5714	2	ENSMUSG00000025219	ENSMUST00000111924	5328	14179	Fgf8	fibroblast growth factor 8
9	87739669	87739969	301	*	4.47034	3.83856	4.90822	-1.10545	0.00246937	0.0434345	Promoter (<=1kb)	9	87738192	87740020	1829	2	ENSMUSG00000102684	ENSMUST00000194954	51
17	27040188	27040488	301	*	4.40333	4.87455	3.69896	1.12562	0.00247065	0.0434345	Distal Intergenic	17	27032859	27037624	4766	1	ENSMUSG00000048731	ENSMUST00000235543	7329	70772	Ggnbp1	gametogenetin binding protein 1
19	3903623	3903923	301	*	3.7304	2.58541	4.36062	-1.79623	0.0024714	0.0434345	Promoter (<=1kb)	19	3898736	3903355	4620	2	ENSMUSG00000001750	ENSMUST00000132164	-268	27060	Tcirg1	T cell, immune regulator 1, ATPase, H+ transporting, lysosomal V0 protein A3
8	70863075	70863375	301	*	4.99275	5.41664	4.38992	0.979961	0.00247497	0.0434646	Promoter (<=1kb)	8	70843906	70863258	19353	2	ENSMUSG00000002908	ENSMUST00000212611	0	84036	Kcnn1	potassium intermediate/small conductance calcium-activated channel, subfamily N, member 1
18	61697470	61697770	301	*	3.92152	4.50159	2.93609	1.50795	0.00248251	0.0435371	Exon (ENSMUST00000025472/ENSMUSG00000024579, exon 6 of 6)	18	61691046	61692384	1339	2	ENSMUSG00000102778	ENSMUST00000191654	-5086
7	105787277	105787577	301	*	4.90599	4.3912	5.28461	-0.931866	0.00248283	0.0435371	Promoter (<=1kb)	7	105763645	105787552	23908	2	ENSMUSG00000036862	ENSMUST00000154659	0	233651	Dchs1	dachsous cadherin related 1
7	4792393	4792693	301	*	5.16111	5.55298	4.62139	0.885697	0.00248647	0.0435683	Promoter (<=1kb)	7	4792874	4795066	2193	1	ENSMUSG00000030432	ENSMUST00000032597	-181	19943	Rpl28	ribosomal protein L28
9	40804623	40804923	301	*	4.41554	4.89122	3.70107	1.14012	0.0024985	0.0437462	Promoter (<=1kb)	9	40804748	40804837	90	1	ENSMUSG00000064791	ENSMUST00000082857	0
16	30070026	30070326	301	*	4.18631	4.74167	3.27162	1.41602	0.00250078	0.0437533	Distal Intergenic	16	30066338	30067319	982	1	ENSMUSG00000022528	ENSMUST00000161839	3688	15205	Hes1	hes family bHLH transcription factor 1
8	80859142	80859442	301	*	5.26068	5.64319	4.73864	0.858973	0.00250332	0.0437649	Intron (ENSMUST00000210676/ENSMUSG00000031714, intron 1 of 10)	8	80879940	80881169	1230	1	ENSMUSG00000109587	ENSMUST00000211421	-20498
9	50123854	50124154	301	*	2.94331	3.77705	0.743659	2.90139	0.00250693	0.0437694	Distal Intergenic	9	50186043	50187045	1003	2	ENSMUSG00000098012	ENSMUST00000182240	62891	667975	Gm8907	glyceraldehyde-3-phosphate dehydrogenase pseudogene
13	90924963	90925263	301	*	3.98464	4.54276	3.06229	1.42456	0.00250752	0.0437694	Downstream (<=300bp)	13	90924185	90924724	540	1	ENSMUSG00000049517	ENSMUST00000224430	778	66475	Rps23	ribosomal protein S23
8	109608195	109608495	301	*	5.96668	6.28736	5.55371	0.689623	0.0025092	0.0437694	Promoter (<=1kb)	8	109596030	109608366	12337	2	ENSMUSG00000031730	ENSMUST00000150804	0	56749	Dhodh	dihydroorotate dehydrogenase
X	12155996	12156296	301	*	3.22593	1.59101	3.97269	-2.37589	0.00251728	0.043873	Intron (ENSMUST00000043441/ENSMUSG00000040363, intron 1 of 13)	20	12131493	12160346	28854	2	ENSMUSG00000040363	ENSMUST00000209776	4050	71458	Bcor	BCL6 interacting corepressor
10	77195656	77195956	301	*	3.85701	4.43547	2.87633	1.50096	0.00251889	0.043873	Distal Intergenic	10	77052178	77166548	114371	2	ENSMUSG00000001435	ENSMUST00000081654	-29108	12822	Col18a1	collagen, type XVIII, alpha 1
2	109280835	109281135	301	*	5.90028	6.22362	5.48289	0.696608	0.00253636	0.0441269	Promoter (<=1kb)	2	109280840	109307501	26662	1	ENSMUSG00000027115	ENSMUST00000151395	0	228421	Kif18a	kinesin family member 18A
8	123454271	123454571	301	*	5.44296	5.81708	4.9365	0.835445	0.00253725	0.0441269	Exon (ENSMUST00000093049/ENSMUSG00000001482, exon 5 of 11)	8	123447182	123452793	5612	1	ENSMUSG00000001482	ENSMUST00000212827	7089	23854	Def8	differentially expressed in FDCP 8
8	46740914	46741214	301	*	5.66408	6.00161	5.22265	0.734477	0.00254207	0.0441569	Intron (ENSMUST00000034041/ENSMUSG00000031627, intron 1 of 8)	8	46740266	46807300	67035	1	ENSMUSG00000031627	ENSMUST00000207571	648	16363	Irf2	interferon regulatory factor 2
9	32032876	32033176	301	*	5.63598	5.97884	5.18536	0.748906	0.00254275	0.0441569	Distal Intergenic	9	32044385	32044858	474	2	ENSMUSG00000110845	ENSMUST00000216731	11682	115487157	Gm47481	60S ribosomal protein L21 pseudogene
10	76029824	76030124	301	*	3.1707	3.94074	1.40793	2.43685	0.00255012	0.044252	Promoter (2-3kb)	10	76032650	76038388	5739	1	ENSMUSG00000049764	ENSMUST00000218627	-2526	64453	Zfp280b	zinc finger protein 280B
17	46771982	46772282	301	*	4.22258	4.73881	3.41109	1.27539	0.00255254	0.0442612	Promoter (<=1kb)	17	46772635	46773396	762	1	ENSMUSG00000062619	ENSMUST00000071430	-353	67101	2310039H08Rik	RIKEN cDNA 2310039H08 gene
8	122576516	122576816	301	*	6.25568	6.55605	5.87588	0.636493	0.00255522	0.0442747	Promoter (<=1kb)	8	122574849	122576732	1884	2	ENSMUSG00000006589	ENSMUST00000212093	0	11821	Aprt	adenine phosphoribosyl transferase
17	33760690	33760990	301	*	3.45806	4.17033	1.99059	2.10342	0.0025593	0.0443124	Promoter (<=1kb)	17	33742484	33760530	18047	2	ENSMUSG00000077450	ENSMUST00000057373	-160	19326	Rab11b	RAB11B, member RAS oncogene family
3	5219328	5219628	301	*	4.15832	3.36852	4.66581	-1.32926	0.0025722	0.0445028	Intron (ENSMUST00000175866/ENSMUSG00000025255, intron 1 of 10)	3	5218554	5415855	197302	1	ENSMUSG00000025255	ENSMUST00000026284	774	80892	Zfhx4	zinc finger homeodomain 4
17	37009610	37009910	301	*	3.08746	3.90522	1.0125	2.77631	0.00257968	0.0445574	Exon (ENSMUST00000089968/ENSMUSG00000036036, exon 6 of 6)	17	37004603	37006248	1646	1	ENSMUSG00000036036	ENSMUST00000172502	5007	22715	Zfp57	zinc finger protein 57
8	91436380	91436680	301	*	3.37425	4.09255	1.87917	2.13388	0.00258344	0.0445574	Intron (ENSMUST00000069718/ENSMUSG00000055932, intron 3 of 8)	8	91450306	91452512	2207	1	ENSMUSG00000110079	ENSMUST00000211232	-13626
17	25282425	25282725	301	*	4.28676	4.77404	3.54547	1.17751	0.00258465	0.0445574	Distal Intergenic	17	25262393	25274622	12230	2	ENSMUSG00000015120	ENSMUST00000174001	-7803	22196	Ube2i	ubiquitin-conjugating enzyme E2I
12	112144076	112144376	301	*	4.23511	3.50193	4.71891	-1.25025	0.00258532	0.0445574	Promoter (1-2kb)	12	112146208	112181747	35540	1	ENSMUSG00000021294	ENSMUST00000128402	-1832	668303	Kif26a	kinesin family member 26A
9	114526985	114527285	301	*	4.95307	5.36775	4.36881	0.952202	0.00258606	0.0445574	Intron (ENSMUST00000111816/ENSMUSG00000079259, intron 1 of 3)	9	114515697	114516601	905	1	ENSMUSG00000097821	ENSMUST00000238379	11288
4	58553119	58553419	301	*	5.7382	6.08254	5.28501	0.753089	0.0025868	0.0445574	Promoter (<=1kb)	4	58435255	58553311	118057	2	ENSMUSG00000038668	ENSMUST00000107571	0	14745	Lpar1	lysophosphatidic acid receptor 1
11	117083321	117083621	301	*	4.19839	4.70253	3.41681	1.23359	0.00259627	0.0446876	Promoter (2-3kb)	11	117085836	117085912	77	1	ENSMUSG00000093083	ENSMUST00000175342	-2215
8	105297814	105298114	301	*	6.91414	7.19033	6.57224	0.57488	0.00260217	0.0447562	Promoter (<=1kb)	8	105297717	105298270	554	1	ENSMUSG00000014859	ENSMUST00000212037	97	104394	E2f4	E2F transcription factor 4
3	82145156	82145456	301	*	4.06999	3.27418	4.57991	-1.33692	0.00261509	0.0449149	Promoter (<=1kb)	3	82092427	82145073	52647	2	ENSMUSG00000033910	ENSMUST00000193924	-83	60596	Gucy1a1	guanylate cyclase 1, soluble, alpha 1
4	134496875	134497175	301	*	3.92664	4.5485	2.80995	1.67862	0.00261525	0.0449149	Promoter (<=1kb)	4	134496975	134507215	10241	1	ENSMUSG00000037348	ENSMUST00000134506	0	71904	Paqr7	progestin and adipoQ receptor family member VII
11	100386614	100386914	301	*	3.78654	4.38831	2.73492	1.59308	0.00262056	0.0449732	Promoter (<=1kb)	11	100383395	100386741	3347	2	ENSMUSG00000001552	ENSMUST00000128268	0	16480	Jup	junction plakoglobin
13	46736063	46736363	301	*	4.49103	4.96875	3.77188	1.14717	0.00262787	0.0450655	Distal Intergenic	13	46679905	46727940	48036	2	ENSMUSG00000021374	ENSMUST00000021803	-8123	218210	Nup153	nucleoporin 153
8	87469090	87469390	301	*	3.02964	1.00591	3.84035	-2.80079	0.00263641	0.0451677	3' UTR	8	87468867	87471068	2202	2	ENSMUSG00000031654	ENSMUST00000211279	1678	12404	Cbln1	cerebellin 1 precursor protein
8	105269549	105269849	301	*	4.14385	4.70063	3.22525	1.42091	0.00263838	0.0451677	Promoter (<=1kb)	8	105269801	105275686	5886	1	ENSMUSG00000033249	ENSMUST00000173640	0	26386	Hsf4	heat shock transcription factor 4
16	22405231	22405531	301	*	3.24668	4.0286	1.41315	2.51887	0.00263964	0.0451677	Promoter (3-4kb)	16	22383579	22401829	18251	2	ENSMUSG00000013089	ENSMUST00000170803	-3402	104156	Etv5	ets variant 5
6	55676828	55677128	301	*	3.6269	2.50471	4.25039	-1.76566	0.00264265	0.0451721	Distal Intergenic	6	55677822	55681263	3442	2	ENSMUSG00000037984	ENSMUST00000044767	4135	11922	Neurod6	neurogenic differentiation 6
7	4123307	4123607	301	*	2.32987	3.28126	0	4.38944	0.00264376	0.0451721	Promoter (<=1kb)	7	4124489	4134239	9751	1	ENSMUSG00000030428	ENSMUST00000206869	-882	57776	Ttyh1	tweety family member 1
8	78556756	78557056	301	*	3.39626	4.11877	1.88149	2.15761	0.00265124	0.0452668	Intron (ENSMUST00000211332/ENSMUSG00000031684, intron 4 of 10)	8	78577751	78734002	156252	1	ENSMUSG00000031684	ENSMUST00000210703	-20695	76775	Slc10a7	solute carrier family 10 (sodium/bile acid cotransporter family), member 7
9	25151200	25151500	301	*	5.90338	6.22317	5.49189	0.687203	0.00265935	0.045324	5' UTR	9	25147744	25151698	3955	2	ENSMUSG00000008429	ENSMUST00000214190	198	80517	Herpud2	HERPUD family member 2
17	29437104	29437404	301	*	4.56532	5.01453	3.90949	1.05631	0.00265979	0.045324	Promoter (<=1kb)	17	29432310	29437066	4757	2	ENSMUSG00000117575	ENSMUST00000234020	-38
12	103425436	103425736	301	*	5.6903	5.31022	5.99084	-0.7214	0.00266046	0.045324	Promoter (<=1kb)	12	103407983	103425780	17798	2	ENSMUSG00000041645	ENSMUST00000110001	44	27225	Ddx24	DEAD box helicase 24
7	141429117	141429417	301	*	4.14693	3.36826	4.64987	-1.31367	0.00266235	0.045324	Promoter (<=1kb)	7	141426451	141429351	2901	2	ENSMUSG00000060240	ENSMUST00000164387	0	57754	Cend1	cell cycle exit and neuronal differentiation 1
4	106837878	106838178	301	*	3.8904	4.46018	2.93501	1.46786	0.00266926	0.0454085	Distal Intergenic	4	106841761	106847920	6160	2	ENSMUSG00000086940	ENSMUST00000151369	9742
1	153009713	153010013	301	*	2.96376	3.80195	0.727189	2.94217	0.00267337	0.0454334	Intron (ENSMUST00000186368/ENSMUSG00000042751, intron 1 of 11)	1	153033374	153074252	40879	1	ENSMUSG00000042751	ENSMUST00000187569	-23361	226518	Nmnat2	nicotinamide nucleotide adenylyltransferase 2
5	25025629	25025929	301	*	3.82435	4.41658	2.80232	1.55503	0.00267461	0.0454334	Intron (ENSMUST00000030784/ENSMUSG00000028944, intron 2 of 15)	5	24862748	24995753	133006	2	ENSMUSG00000028944	ENSMUST00000076306	-29876	108099	Prkag2	protein kinase, AMP-activated, gamma 2 non-catalytic subunit
2	164997506	164997806	301	*	4.88322	4.37081	5.26057	-0.92816	0.00268356	0.0455154	3' UTR	2	164996591	164999722	3132	1	ENSMUSG00000017740	ENSMUST00000137302	915	57138	Slc12a5	solute carrier family 12, member 5
19	38395945	38396245	301	*	5.76121	6.09573	5.32495	0.72643	0.00268396	0.0455154	Promoter (<=1kb)	19	38395980	38405610	9631	1	ENSMUSG00000044026	ENSMUST00000054098	0	240660	Slc35g1	solute carrier family 35, member G1
1	164493929	164494229	301	*	3.06021	3.84285	1.2223	2.51645	0.00268528	0.0455154	Distal Intergenic	1	164489060	164489375	316	1	ENSMUSG00000103226	ENSMUST00000194377	4869
5	25498119	25498419	301	*	5.77622	6.1006	5.35709	0.699256	0.00269709	0.0456823	Exon (ENSMUST00000045291/ENSMUSG00000038056, exon 1 of 59)	5	25315737	25498702	182966	2	ENSMUSG00000038056	ENSMUST00000173073	283	231051	Kmt2c	lysine (K)-specific methyltransferase 2C
3	97227877	97228177	301	*	5.10035	4.62299	5.45841	-0.874646	0.00269972	0.0456937	Intron (ENSMUST00000141861/ENSMUSG00000038256, intron 1 of 3)	3	97214484	97228330	13847	2	ENSMUSG00000038256	ENSMUST00000141861	153	77578	Bcl9	B cell CLL/lymphoma 9
1	136674402	136674702	301	*	3.36759	4.11204	1.74458	2.28316	0.0027059	0.0457098	Promoter (1-2kb)	1	136676473	136682727	6255	1	ENSMUSG00000097113	ENSMUST00000181491	-1771	100503460	Gm19705	predicted gene, 19705
11	120236907	120237207	301	*	5.54387	5.89081	5.08615	0.759928	0.00270613	0.0457098	5' UTR	11	120236699	120292282	55584	1	ENSMUSG00000039741	ENSMUST00000118987	208	268515	Bahcc1	BAH domain and coiled-coil containing 1
8	57511960	57512260	301	*	5.92326	6.25581	5.49035	0.721314	0.00270821	0.0457098	Promoter (<=1kb)	8	57511974	57513209	1236	1	ENSMUSG00000054717	ENSMUST00000210871	0	97165	Hmgb2	high mobility group box 2
5	96209615	96209915	301	*	4.5244	4.97073	3.87476	1.04714	0.0027085	0.0457098	Intron (ENSMUST00000117766/ENSMUSG00000029486, intron 1 of 9)	5	96209493	96266727	57235	1	ENSMUSG00000029486	ENSMUST00000117766	122	94061	Mrpl1	mitochondrial ribosomal protein L1
6	117919682	117919982	301	*	2.86761	3.73031	0.406087	3.16767	0.00271106	0.0457201	Promoter (1-2kb)	6	117916531	117917722	1192	2	ENSMUSG00000107608	ENSMUST00000203822	-1960
8	47336269	47336569	301	*	4.38281	4.86147	3.6615	1.1497	0.00271791	0.0458024	Intron (ENSMUST00000211882/ENSMUSG00000038143, intron 2 of 5)	8	47185940	47352348	166409	2	ENSMUSG00000038143	ENSMUST00000110367	15779	71069	Stox2	storkhead box 2
7	118853474	118853774	301	*	3.24682	3.99893	1.58367	2.326	0.00273777	0.0461039	Intron (ENSMUST00000116280/ENSMUSG00000030980, intron 1 of 4)	7	118845501	118855613	10113	2	ENSMUSG00000030980	ENSMUST00000106549	1839	66356	Knop1	lysine rich nucleolar protein 1
12	108275985	108276285	301	*	4.88932	4.36715	5.27191	-0.943099	0.0027432	0.04614	Promoter (<=1kb)	12	108203602	108275425	71824	2	ENSMUSG00000084883	ENSMUST00000222310	-560	668158	Ccdc85c	coiled-coil domain containing 85C
14	55767926	55768226	301	*	2.97257	1.00567	3.77514	-2.73638	0.00274452	0.04614	Exon (ENSMUST00000057569/ENSMUSG00000046908, exon 2 of 2)	14	55765962	55768494	2533	1	ENSMUSG00000046908	ENSMUST00000057569	1964	16995	Ltb4r1	leukotriene B4 receptor 1
8	119604836	119605136	301	*	5.87084	6.191	5.45875	0.688129	0.00274584	0.04614	Promoter (<=1kb)	8	119597871	119605206	7336	2	ENSMUSG00000031832	ENSMUST00000212929	70	21341	Taf1c	TATA-box binding protein associated factor, RNA polymerase I, C
1	5916977	5917277	301	*	3.92224	3.05635	4.45958	-1.43207	0.00275668	0.0462888	Exon (ENSMUST00000044180/ENSMUSG00000033774, exon 1 of 1)	1	5913707	5917398	3692	2	ENSMUSG00000033774	ENSMUST00000044180	121	226304	Npbwr1	neuropeptides B/W receptor 1
2	75137404	75137704	301	*	2.97007	0.994754	3.77386	-2.74581	0.00276014	0.0463108	Promoter (<=1kb)	2	75124871	75137798	12928	2	ENSMUSG00000087333	ENSMUST00000143898	94	102634853	Gm13652	predicted gene 13652
7	35204000	35204300	301	*	3.43708	4.11526	2.11473	1.92802	0.00276196	0.0463108	Promoter (<=1kb)	7	35200878	35203225	2348	2	ENSMUSG00000001802	ENSMUST00000155404	-775	435965	Lrp3	low density lipoprotein receptor-related protein 3
8	110844602	110844902	301	*	3.73851	4.34772	2.66324	1.62307	0.00277631	0.0465182	Exon (ENSMUST00000212613/ENSMUSG00000033732, exon 1 of 1)	8	110840568	110845057	4490	2	ENSMUSG00000033732	ENSMUST00000212613	155	101943	Sf3b3	splicing factor 3b, subunit 3
15	7813075	7813375	301	*	3.92546	3.05779	4.46347	-1.43451	0.00278071	0.046543	Intron (ENSMUST00000022744/ENSMUSG00000022144, intron 1 of 2)	15	7810846	7837575	26730	1	ENSMUSG00000022144	ENSMUST00000022744	2229	14573	Gdnf	glial cell line derived neurotrophic factor
15	101438736	101439036	301	*	3.68358	2.66356	4.27516	-1.63474	0.00278178	0.046543	Promoter (<=1kb)	15	101431038	101438804	7767	2	ENSMUSG00000047641	ENSMUST00000081945	0	406219	Krt87	keratin 87
2	71875188	71875488	301	*	4.14505	4.66504	3.32405	1.28795	0.00278981	0.0466412	Exon (ENSMUST00000006669/ENSMUSG00000006494, exon 2 of 11)	2	71875079	71883607	8529	1	ENSMUSG00000006494	ENSMUST00000129887	109	228026	Pdk1	pyruvate dehydrogenase kinase, isoenzyme 1
17	56148810	56149110	301	*	2.66234	0.00393703	3.5433	-3.42494	0.00279164	0.0466412	Distal Intergenic	17	56123085	56140343	17259	2	ENSMUSG00000001227	ENSMUST00000001256	-8467	20359	Sema6b	sema domain, transmembrane domain (TM), and cytoplasmic domain, (semaphorin) 6B
8	105231653	105231953	301	*	3.68338	4.32609	2.49484	1.76668	0.00280738	0.0468705	Intron (ENSMUST00000034361/ENSMUSG00000031889, intron 2 of 15)	8	105230968	105240039	9072	1	ENSMUSG00000031889	ENSMUST00000132964	685	234678	Phaf1	phagosome assembly factor 1
14	70638466	70638766	301	*	3.19031	3.96324	1.41073	2.45639	0.0028152	0.0469675	Promoter (2-3kb)	14	70602185	70636048	33864	2	ENSMUSG00000022099	ENSMUST00000022695	-2418	13829	Dmtn	dematin actin binding protein
8	84985808	84986108	301	*	6.05565	6.35767	5.6732	0.640635	0.00281948	0.0470054	Promoter (4-5kb)	8	84990603	85003343	12741	1	ENSMUSG00000052566	ENSMUST00000209764	-4495	170833	Hook2	hook microtubule tethering protein 2
8	69791284	69791584	301	*	7.16198	7.43149	6.83029	0.558103	0.00282313	0.0470326	Promoter (<=1kb)	8	69791271	69807746	16476	1	ENSMUSG00000031862	ENSMUST00000238491	13	170759	Atp13a1	ATPase type 13A1
8	116978667	116978967	301	*	6.42097	6.7053	6.06649	0.595318	0.00282847	0.0470881	Promoter (<=1kb)	8	116969594	116978943	9350	2	ENSMUSG00000031847	ENSMUST00000070577	0	69528	1700030J22Rik	RIKEN cDNA 1700030J22 gene
5	112179677	112179977	301	*	3.66266	2.50151	4.29758	-1.81572	0.00283951	0.0472283	Distal Intergenic	5	112156237	112165244	9008	1	ENSMUSG00000104538	ENSMUST00000197688	23440	75640	1700016B01Rik	RIKEN cDNA 1700016B01 gene
8	106632714	106633014	301	*	3.98605	4.56721	2.99739	1.51288	0.00284094	0.0472283	Intron (ENSMUST00000000312/ENSMUSG00000000303, intron 2 of 15)	8	106604143	106653919	49777	1	ENSMUSG00000000303	ENSMUST00000136580	28571	12550	Cdh1	cadherin 1
8	126945182	126945482	301	*	6.39079	6.68828	6.01559	0.62913	0.00284446	0.0472532	Promoter (<=1kb)	8	126944847	126944980	134	2	ENSMUSG00000065637	ENSMUST00000083703	-202	115487043	Gm26397	predicted gene, 26397
12	101016707	101017007	301	*	3.19443	3.9687	1.4069	2.46559	0.00284784	0.0472757	Intron (ENSMUST00000068411/ENSMUSG00000021182, intron 3 of 29)	12	101021673	101021768	96	2	ENSMUSG00000080575	ENSMUST00000116925	4761	100316805	Mir1190	microRNA 1190
3	132086972	132087272	301	*	3.14864	1.22839	3.94423	-2.69367	0.00285163	0.0472952	Intron (ENSMUST00000029665/ENSMUSG00000028031, intron 1 of 3)	3	132085292	132180304	95013	1	ENSMUSG00000028031	ENSMUST00000029665	1680	56811	Dkk2	dickkopf WNT signaling pathway inhibitor 2
10	61448148	61448448	301	*	3.24506	3.99779	1.57862	2.32985	0.00285306	0.0472952	Exon (ENSMUST00000220281/ENSMUSG00000112229, exon 2 of 2)	10	61446902	61450717	3816	2	ENSMUSG00000112229	ENSMUST00000220281	2269
19	23145205	23145505	301	*	3.11532	1.22753	3.90591	-2.65649	0.00286141	0.0473999	Intron (ENSMUST00000036884/ENSMUSG00000033863, intron 1 of 1)	19	23143644	23165471	21828	1	ENSMUSG00000033863	ENSMUST00000236357	1561	16601	Klf9	Kruppel-like factor 9
14	21486213	21486513	301	*	3.77061	4.3879	2.66903	1.65724	0.00288154	0.0476666	Intron (ENSMUST00000182996/ENSMUSG00000021767, intron 1 of 1)	14	21481459	21621977	140519	1	ENSMUSG00000021767	ENSMUST00000183201	4754	54169	Kat6b	K(lysine) acetyltransferase 6B
8	94191364	94191664	301	*	3.39325	4.08801	2.00258	2.00984	0.00288159	0.0476666	Distal Intergenic	8	94183289	94184969	1681	1	ENSMUSG00000110524	ENSMUST00000212456	8075
6	82703431	82703731	301	*	3.82638	4.41778	2.80691	1.55165	0.00288515	0.0476918	Intron (ENSMUST00000161309/ENSMUSG00000030042, intron 1 of 3)	6	82618992	82705365	86374	2	ENSMUSG00000030042	ENSMUST00000161309	1634	66979	Pole4	polymerase (DNA-directed), epsilon 4 (p12 subunit)
11	88045972	88046272	301	*	3.58518	4.22251	2.4156	1.74116	0.00288928	0.0477263	Promoter (1-2kb)	11	88047373	88053755	6383	1	ENSMUSG00000018379	ENSMUST00000139129	-1101	110809	Srsf1	serine and arginine-rich splicing factor 1
16	4597074	4597374	301	*	2.69981	3.5844	0	3.39081	0.00289347	0.0477617	Intron (ENSMUST00000014447/ENSMUSG00000014303, intron 1 of 6)	16	4594713	4615957	21245	1	ENSMUSG00000014303	ENSMUST00000014447	2361	83396	Glis2	GLIS family zinc finger 2
5	115470743	115471043	301	*	3.58724	4.22498	2.41626	1.74296	0.00289767	0.0477764	Exon (ENSMUST00000145785/ENSMUSG00000029522, exon 2 of 3)	5	115466272	115474561	8290	1	ENSMUSG00000029522	ENSMUST00000125568	4471	18778	Pla2g1b	phospholipase A2, group IB, pancreas
14	20663281	20663581	301	*	3.38884	4.08275	2.00172	2.00546	0.00289845	0.0477764	Intron (ENSMUST00000057090/ENSMUSG00000039376, intron 3 of 3)	14	20658948	20664574	5627	2	ENSMUSG00000039376	ENSMUST00000119483	993	68760	Synpo2l	synaptopodin 2-like
18	76087331	76087631	301	*	3.90801	4.48324	2.93682	1.48899	0.00290536	0.0478565	Intron (ENSMUST00000058997/ENSMUSG00000044646, intron 3 of 4)	18	76091557	76098471	6915	2	ENSMUSG00000117797	ENSMUST00000236092	10840	73009	2900057B20Rik	RIKEN cDNA 2900057B20 gene
15	102411869	102412169	301	*	3.11785	3.90807	1.23245	2.57113	0.00291151	0.0479091	Intron (ENSMUST00000163709/ENSMUSG00000001280, intron 3 of 5)	15	102407588	102408385	798	1	ENSMUSG00000001280	ENSMUST00000168802	4281	20683	Sp1	trans-acting transcription factor 1
2	102121235	102121535	301	*	2.54075	3.45514	0	3.76161	0.0029142	0.0479091	Intron (ENSMUST00000111222/ENSMUSG00000048058, intron 1 of 5)	2	102111569	102138119	26551	2	ENSMUSG00000048058	ENSMUST00000127888	16584	241576	Ldlrad3	low density lipoprotein receptor class A domain containing 3
12	84640966	84641266	301	*	3.84165	2.93747	4.39321	-1.48308	0.0029148	0.0479091	Promoter (<=1kb)	12	84641019	84648873	7855	1	ENSMUSG00000071235	ENSMUST00000221915	0	432677	Vrtn	vertebrae development associated
5	122145459	122145759	301	*	3.60256	4.27239	2.31316	1.89089	0.00291676	0.0479091	Promoter (4-5kb)	5	122136119	122140823	4705	2	ENSMUSG00000043036	ENSMUST00000196608	-4636	330188	Ccdc63	coiled-coil domain containing 63
8	84147573	84147873	301	*	6.11483	6.41487	5.73555	0.635545	0.00291934	0.0479125	Promoter (<=1kb)	8	84132828	84147865	15038	2	ENSMUSG00000036686	ENSMUST00000117424	0	212139	Cc2d1a	coiled-coil and C2 domain containing 1A
10	67099002	67099302	301	*	4.59495	5.04466	3.93805	1.058	0.00292119	0.0479125	Promoter (2-3kb)	10	67009189	67096945	87757	2	ENSMUSG00000019873	ENSMUST00000020023	-2057	28193	Reep3	receptor accessory protein 3
6	145866268	145866568	301	*	4.68104	4.14259	5.07224	-0.967195	0.00292312	0.0479125	Promoter (<=1kb)	6	145858243	145865558	7316	2	ENSMUSG00000030256	ENSMUST00000032386	-710	79362	Bhlhe41	basic helix-loop-helix family, member e41
17	35263018	35263318	301	*	5.01442	4.54401	5.36859	-0.86364	0.00292773	0.0479241	Promoter (<=1kb)	17	35263096	35267353	4258	1	ENSMUSG00000073411	ENSMUST00000172503	0	14964	H2-D1	histocompatibility 2, D region locus 1
12	99412254	99412554	301	*	4.14414	4.6631	3.32575	1.28433	0.00292793	0.0479241	Promoter (<=1kb)	12	99341503	99412605	71103	2	ENSMUSG00000033713	ENSMUST00000177269	51	71375	Foxn3	forkhead box N3
1	128591520	128591820	301	*	4.69123	4.14091	5.08863	-0.9852	0.00293299	0.0479732	Intron (ENSMUST00000052172/ENSMUSG00000045382, intron 1 of 1)	1	128588199	128592290	4092	2	ENSMUSG00000045382	ENSMUST00000052172	470	12767	Cxcr4	chemokine (C-X-C motif) receptor 4
10	63339316	63339616	301	*	4.63589	5.07504	4.00147	1.02534	0.00294875	0.0481972	Promoter (<=1kb)	10	63319058	63339035	19978	2	ENSMUSG00000020063	ENSMUST00000105442	-281	93759	Sirt1	sirtuin 1
4	55651260	55651560	301	*	4.0282	3.16517	4.56445	-1.42915	0.00295141	0.0482071	Distal Intergenic	4	55605149	55636901	31753	1	ENSMUSG00000085375	ENSMUST00000123620	46111
8	48228559	48228859	301	*	4.66383	5.08876	4.0589	0.982019	0.00295942	0.048304	Exon (ENSMUST00000033965/ENSMUSG00000031561, exon 29 of 29)	8	48270248	48270985	738	2	ENSMUSG00000110480	ENSMUST00000212653	42126
8	129234047	129234347	301	*	4.62375	5.07212	3.96974	1.05392	0.00296235	0.0483148	Promoter (<=1kb)	8	129216354	129234046	17693	2	ENSMUSG00000071302	ENSMUST00000190157	-1	72139	2610044O15Rik8	RIKEN cDNA 2610044O15 gene
11	58640488	58640788	301	*	3.73486	2.73564	4.31956	-1.60817	0.00296609	0.0483148	Promoter (<=1kb)	11	58640465	58652404	11940	1	ENSMUSG00000037124	ENSMUST00000075084	23	216781	Trim58	tripartite motif-containing 58
11	95989500	95989800	301	*	2.668	3.54997	0	3.35746	0.00296628	0.0483148	Intron (ENSMUST00000013559/ENSMUSG00000013415, intron 2 of 14)	11	95973979	95982611	8633	2	ENSMUSG00000013415	ENSMUST00000146586	-6889	140486	Igf2bp1	insulin-like growth factor 2 mRNA binding protein 1
8	106210595	106210895	301	*	6.69719	6.97694	6.34982	0.583799	0.00297575	0.0484353	Promoter (<=1kb)	8	106209727	106210925	1199	2	ENSMUSG00000033106	ENSMUST00000212397	30	66432	Slc7a6os	solute carrier family 7, member 6 opposite strand
8	64947263	64947563	301	*	6.46968	6.75919	6.10711	0.608598	0.00298226	0.0485074	Promoter (<=1kb)	8	64947254	64969031	21778	1	ENSMUSG00000025521	ENSMUST00000079896	9	73067	Tmem192	transmembrane protein 192
19	10457773	10458073	301	*	3.98164	4.53926	3.06069	1.42266	0.00299191	0.0486305	Promoter (<=1kb)	19	10455371	10457473	2103	2	ENSMUSG00000090291	ENSMUST00000171400	-300	278795	Lrrc10b	leucine rich repeat containing 10B
2	154603919	154604219	301	*	2.31806	3.26916	0	4.38089	0.00299539	0.0486533	Promoter (<=1kb)	2	154585758	154603708	17951	2	ENSMUSG00000000876	ENSMUST00000000896	-211	59038	Pxmp4	peroxisomal membrane protein 4
18	49755798	49756098	301	*	4.91523	5.31068	4.36866	0.895465	0.00299865	0.0486723	Promoter (<=1kb)	18	49755794	49757189	1396	1	ENSMUSG00000087020	ENSMUST00000149935	4	102635853	Gm16283	predicted gene 16283
8	69625230	69625530	301	*	5.85731	6.17574	5.4481	0.683512	0.00301037	0.0488016	Promoter (<=1kb)	8	69618869	69625545	6677	2	ENSMUSG00000060427	ENSMUST00000140522	15	234362	Zfp868	zinc finger protein 868
17	29038624	29038924	301	*	3.84021	4.41401	2.87319	1.48275	0.00301148	0.0488016	Promoter (<=1kb)	17	29039454	29040735	1282	1	ENSMUSG00000071172	ENSMUST00000233010	-530	20383	Srsf3	serine and arginine-rich splicing factor 3
7	29784003	29784303	301	*	5.66849	6.00741	5.22469	0.738218	0.0030148	0.0488016	Promoter (<=1kb)	7	29784023	29791912	7890	1	ENSMUSG00000047473	ENSMUST00000126504	0	22693	Zfp30	zinc finger protein 30
8	89012077	89012377	301	*	4.54539	5.00089	3.87593	1.07602	0.00301498	0.0488016	Distal Intergenic	8	89024735	89024831	97	1	ENSMUSG00000099078	ENSMUST00000183771	-12358	102465899	Mir8110	microRNA 8110
17	56883815	56884115	301	*	3.62476	4.24816	2.5029	1.68125	0.00301822	0.0488204	Exon (ENSMUST00000025048/ENSMUSG00000024209, exon 10 of 14)	17	56875503	56877818	2316	1	ENSMUSG00000024209	ENSMUST00000125425	8312	78625	Acsbg3	acyl-CoA synthetase bubblegum family member 3
12	104864578	104864878	301	*	5.06007	4.58478	5.41698	-0.871339	0.00302648	0.04892	Exon (ENSMUST00000109936/ENSMUSG00000021097, exon 1 of 13)	12	104771480	104865009	93530	2	ENSMUSG00000021097	ENSMUST00000109937	131	94040	Clmn	calmin
2	20445380	20445680	301	*	3.05817	3.8719	1.01278	2.74299	0.00304765	0.049222	Intron (ENSMUST00000114610/ENSMUSG00000036617, intron 3 of 7)	2	20420570	20432934	12365	2	ENSMUSG00000085477	ENSMUST00000149398	-12446
5	148399451	148399751	301	*	5.90661	6.21573	5.51268	0.659028	0.00305005	0.049222	Promoter (<=1kb)	5	148342081	148399791	57711	2	ENSMUSG00000041313	ENSMUST00000202457	40	11987	Slc7a1	solute carrier family 7 (cationic amino acid transporter, y+ system), member 1
4	41123304	41123604	301	*	4.50175	4.95325	3.841	1.06321	0.00305148	0.049222	Promoter (<=1kb)	4	41121547	41123534	1988	2	ENSMUSG00000028430	ENSMUST00000129112	0	230082	Nol6	nucleolar protein family 6 (RNA-associated)
13	38345441	38345741	301	*	4.92407	4.43778	5.28712	-0.888055	0.00307525	0.0495178	5' UTR	13	38345107	38500302	155196	1	ENSMUSG00000039004	ENSMUST00000171970	334	12161	Bmp6	bone morphogenetic protein 6
9	35116525	35116825	301	*	5.35117	5.71834	4.85744	0.815665	0.00307527	0.0495178	Promoter (<=1kb)	9	35116728	35130922	14195	1	ENSMUSG00000070315	ENSMUST00000093873	0	78934	4930581F22Rik	RIKEN cDNA 4930581F22 gene
4	134852985	134853285	301	*	6.33194	6.62582	5.96247	0.619772	0.00307651	0.0495178	Promoter (<=1kb)	4	134811194	134853149	41956	2	ENSMUSG00000028826	ENSMUST00000137707	0	66146	Maco1	macoilin 1
12	106310761	106311061	301	*	3.21835	1.59139	3.96356	-2.36645	0.0030783	0.0495178	Distal Intergenic	12	106327368	106330821	3454	1	ENSMUSG00000091280	ENSMUST00000164367	-16307
11	102896766	102897066	301	*	3.5476	2.41564	4.174	-1.77686	0.00308056	0.0495201	Promoter (<=1kb)	11	102887336	102897131	9796	2	ENSMUSG00000020932	ENSMUST00000067444	65	14580	Gfap	glial fibrillary acidic protein
13	40732781	40733081	301	*	3.75408	2.8074	4.32082	-1.53897	0.00308943	0.0496285	Intron (ENSMUST00000181176/ENSMUSG00000097752, intron 1 of 2)	13	40721104	40733778	12675	2	ENSMUSG00000021359	ENSMUST00000223908	697	21418	Tfap2a	transcription factor AP-2, alpha
19	57314556	57314856	301	*	5.16889	4.67963	5.53358	-0.893251	0.0030979	0.0497303	Promoter (<=1kb)	19	57130606	57314911	184306	2	ENSMUSG00000025085	ENSMUST00000111524	55	226251	Ablim1	actin-binding LIM protein 1
9	20948049	20948349	301	*	3.08529	3.87202	1.22191	2.54575	0.00310621	0.0498294	Intron (ENSMUST00000178110/ENSMUSG00000004099, intron 1 of 38)	9	20907521	20952605	45085	2	ENSMUSG00000004099	ENSMUST00000216540	4256	13433	Dnmt1	DNA methyltransferase (cytosine-5) 1
4	156192120	156192420	301	*	3.80868	4.39295	2.81077	1.52313	0.00311364	0.0499143	Intron (ENSMUST00000180572/ENSMUSG00000041936, intron 2 of 35)	4	156165778	156197488	31711	2	ENSMUSG00000041936	ENSMUST00000180572	5068	11603	Agrn	agrin
8	69973777	69974077	301	*	6.45202	6.73334	6.10222	0.58766	0.00313179	0.050171	Intron (ENSMUST00000177851/ENSMUSG00000036180, intron 1 of 11)	8	69908656	69974271	65616	2	ENSMUSG00000036180	ENSMUST00000116463	194	234366	Gatad2a	GATA zinc finger domain containing 2A
14	118696249	118696549	301	*	3.70152	4.34953	2.49396	1.79085	0.00313754	0.0502286	Intron (ENSMUST00000036554/ENSMUSG00000032849, intron 1 of 30)	14	118484333	118699492	215160	2	ENSMUSG00000032849	ENSMUST00000228848	2943	239273	Abcc4	ATP-binding cassette, sub-family C (CFTR/MRP), member 4
7	6730178	6730478	301	*	5.43823	5.79041	4.97133	0.774137	0.00314034	0.0502389	Promoter (<=1kb)	7	6703892	6730421	26530	2	ENSMUSG00000002265	ENSMUST00000051209	0	18616	Peg3	paternally expressed 3
9	79745262	79745562	301	*	3.34541	4.05918	1.87112	2.10871	0.00315727	0.0504752	Distal Intergenic	9	79755406	79759251	3846	2	ENSMUSG00000032330	ENSMUST00000215933	13689	12866	Cox7a2	cytochrome c oxidase subunit 7A2
8	104248278	104248578	301	*	6.07234	6.39445	5.65699	0.69352	0.00317546	0.0507314	Promoter (<=1kb)	8	104226685	104248558	21874	2	ENSMUSG00000035824	ENSMUST00000050211	0	57813	Tk2	thymidine kinase 2, mitochondrial
4	129810245	129810545	301	*	3.85661	4.43751	2.86875	1.51052	0.0031805	0.0507772	Promoter (<=1kb)	4	129811219	129839232	28014	1	ENSMUSG00000028788	ENSMUST00000132386	-674	19244	Ptp4a2	protein tyrosine phosphatase 4a2
18	80211313	80211613	301	*	2.81552	3.67242	0.410901	3.10567	0.00319552	0.0509668	Promoter (3-4kb)	18	80215380	80222338	6959	1	ENSMUSG00000057130	ENSMUST00000130675	-3767	27366	Txnl4a	thioredoxin-like 4A
11	20173390	20173690	301	*	3.16993	3.93825	1.41708	2.42536	0.00319675	0.0509668	Distal Intergenic	11	20194633	20194735	103	2	ENSMUSG00000084442	ENSMUST00000122493	21045	115487858	Gm26253	predicted gene, 26253
1	91345136	91345436	301	*	4.35721	3.73674	4.78967	-1.08827	0.00321755	0.0512635	Exon (ENSMUST00000088904/ENSMUSG00000049515, exon 9 of 9)	1	91351016	91362416	11401	1	ENSMUSG00000026308	ENSMUST00000027533	-5580	70788	Klhl30	kelch-like 30
18	56675171	56675471	301	*	3.48071	4.14178	2.22487	1.84709	0.00322777	0.0513607	Distal Intergenic	18	56667778	56668222	445	1	ENSMUSG00000118275	ENSMUST00000235398	7393
10	120167560	120167860	301	*	3.56863	4.22552	2.32843	1.82921	0.00322805	0.0513607	Promoter (<=1kb)	10	120168649	120170345	1697	1	ENSMUSG00000112894	ENSMUST00000220425	-789
8	123411625	123411925	301	*	5.4761	5.83345	5.00002	0.788506	0.00323649	0.05146	Promoter (<=1kb)	8	123411590	123421094	9505	1	ENSMUSG00000062380	ENSMUST00000212743	35	22152	Tubb3	tubulin, beta 3 class III
5	104025356	104025656	301	*	3.37133	4.08913	1.87854	2.13111	0.00324868	0.0516187	Promoter (3-4kb)	5	103989762	104021919	32158	2	ENSMUSG00000029311	ENSMUST00000031251	-3437	114664	Hsd17b11	hydroxysteroid (17-beta) dehydrogenase 11
2	73279690	73279990	301	*	2.73883	0.408871	3.58771	-3.10487	0.0032528	0.0516372	Intron (ENSMUST00000147133/ENSMUSG00000068859, intron 1 of 2)	2	73271966	73284706	12741	1	ENSMUSG00000068859	ENSMUST00000147133	7724	381373	Sp9	trans-acting transcription factor 9
17	29078568	29078868	301	*	3.99949	4.54267	3.11804	1.36952	0.00325452	0.0516372	Intron (ENSMUST00000133221/ENSMUSG00000085912, intron 1 of 1)	17	29057430	29079179	21750	2	ENSMUSG00000085912	ENSMUST00000133221	311	100504267	Trp53cor1	tumor protein p53 pathway corepressor 1
4	40227489	40227789	301	*	3.60261	4.24699	2.4081	1.77291	0.00325899	0.0516372	Exon (ENSMUST00000149539/ENSMUSG00000040296, exon 4 of 4)	4	40226570	40228356	1787	2	ENSMUSG00000040296	ENSMUST00000139110	567	230073	Rigi	RNA sensor RIG-I
6	105677782	105678082	301	*	3.87578	2.99681	4.41803	-1.44939	0.00325945	0.0516372	Promoter (<=1kb)	6	105677775	106699310	1021536	1	ENSMUSG00000064293	ENSMUST00000089208	7	269784	Cntn4	contactin 4
5	144182876	144183176	301	*	3.48147	4.14376	2.221	1.8529	0.0032609	0.0516372	Intron (ENSMUST00000041804/ENSMUSG00000038970, intron 12 of 13)	5	144190286	144194441	4156	1	ENSMUSG00000052271	ENSMUST00000060747	-7110	17341	Bhlha15	basic helix-loop-helix family, member a15
2	129039035	129039335	301	*	5.03644	4.56261	5.39252	-0.869015	0.00327035	0.0517517	Exon (ENSMUST00000145798/ENSMUSG00000079051, exon 3 of 7)	2	129025073	129048172	23100	2	ENSMUSG00000079051	ENSMUST00000145798	8837	668894	Vinac1	vinculin/alpha-catenin family member 1
12	28607810	28608110	301	*	3.22822	1.73781	3.9455	-2.20792	0.00327774	0.051821	Intron (ENSMUST00000036136/ENSMUSG00000036655, intron 3 of 6)	12	28594657	28623260	28604	2	ENSMUSG00000036655	ENSMUST00000220836	15150	71693	Colec11	collectin sub-family member 11
10	81414080	81414380	301	*	2.27957	3.22933	0	4.34172	0.00327917	0.051821	Intron (ENSMUST00000105321/ENSMUSG00000055053, intron 2 of 8)	10	81416240	81416297	58	2	ENSMUSG00000105379	ENSMUST00000199973	1917	102465778	Mir1191b	microRNA 1191b
2	24762717	24763017	301	*	4.80859	4.2968	5.18559	-0.926981	0.00329529	0.0520276	Promoter (<=1kb)	2	24606375	24763047	156673	2	ENSMUSG00000004113	ENSMUST00000100348	30	12287	Cacna1b	calcium channel, voltage-dependent, N type, alpha 1B subunit
8	70856721	70857021	301	*	4.98566	5.38245	4.43652	0.899547	0.00329669	0.0520276	Promoter (<=1kb)	8	70842049	70857008	14960	2	ENSMUSG00000002908	ENSMUST00000110081	0	84036	Kcnn1	potassium intermediate/small conductance calcium-activated channel, subfamily N, member 1
2	112377567	112377867	301	*	3.67829	4.34354	2.40653	1.8704	0.00330128	0.0520649	Promoter (1-2kb)	2	112379211	112414240	35030	1	ENSMUSG00000027132	ENSMUST00000028552	-1344	72425	Katnbl1	katanin p80 subunit B like 1
4	155084627	155084927	301	*	3.97042	4.5225	3.06482	1.40189	0.00330593	0.052103	Intron (ENSMUST00000149796/ENSMUSG00000029048, intron 1 of 7)	4	155074110	155086371	12262	2	ENSMUSG00000029048	ENSMUST00000149796	1444	67830	Rer1	retention in endoplasmic reticulum sorting receptor 1
2	71750302	71750602	301	*	3.87025	4.45382	2.87441	1.52111	0.00331265	0.0521569	Intron (ENSMUST00000133124/ENSMUSG00000027111, intron 2 of 5)	2	71749925	71759801	9877	1	ENSMUSG00000084794	ENSMUST00000157059	377
18	84085803	84086103	301	*	4.54481	4.98499	3.90823	1.02814	0.00331547	0.0521569	5' UTR	18	84011627	84086404	74778	2	ENSMUSG00000046982	ENSMUST00000060303	301	110796	Tshz1	teashirt zinc finger family member 1
7	30592702	30593002	301	*	3.24878	3.9994	1.59359	2.31669	0.00331605	0.0521569	Promoter (<=1kb)	7	30589681	30592942	3262	2	ENSMUSG00000006310	ENSMUST00000108151	0	58206	Zbtb32	zinc finger and BTB domain containing 32
8	84638476	84638776	301	*	5.38161	5.7459	4.89308	0.807662	0.00334052	0.052481	Promoter (<=1kb)	8	84638991	84639434	444	1	ENSMUSG00000034656	ENSMUST00000130507	-215	12286	Cacna1a	calcium channel, voltage-dependent, P/Q type, alpha 1A subunit
12	110591353	110591653	301	*	5.54957	5.15776	5.85738	-0.740157	0.00334115	0.052481	Exon (ENSMUST00000221143/ENSMUSG00000113361, exon 1 of 1)	12	110590512	110592700	2189	1	ENSMUSG00000113361	ENSMUST00000221143	841
9	99424340	99424640	301	*	3.48137	4.14437	2.2182	1.85627	0.00334485	0.0525039	Intron (ENSMUST00000035045/ENSMUSG00000032470, intron 1 of 5)	9	99387979	99425896	37918	2	ENSMUSG00000032470	ENSMUST00000119472	1256	17532	Mras	muscle and microspikes RAS
15	25764816	25765116	301	*	4.02962	4.56549	3.1676	1.34339	0.00334858	0.052527	Promoter (3-4kb)	15	25768556	25776345	7790	1	ENSMUSG00000022272	ENSMUST00000151360	-3440	17909	Myo10	myosin X
4	47474363	47474663	301	*	4.38922	4.87227	3.65779	1.16413	0.00335145	0.0525368	Promoter (<=1kb)	4	47474658	47483242	8585	1	ENSMUSG00000053317	ENSMUST00000065678	0	66212	Sec61b	Sec61 beta subunit
5	147957424	147957724	301	*	5.95059	6.26584	5.54661	0.675218	0.00335663	0.0525827	Promoter (<=1kb)	5	147957342	148076537	119196	1	ENSMUSG00000029651	ENSMUST00000129092	82	77521	Mtus2	microtubule associated tumor suppressor candidate 2
16	18066482	18066782	301	*	6.13991	6.43742	5.76469	0.628983	0.0033746	0.0528288	Promoter (<=1kb)	16	18066448	18071632	5185	1	ENSMUSG00000003531	ENSMUST00000155387	34	13353	Dgcr6	DiGeorge syndrome critical region gene 6
19	38397334	38397634	301	*	2.77672	3.62968	0.409401	3.0648	0.00337986	0.0528758	Intron (ENSMUST00000054098/ENSMUSG00000044026, intron 1 of 2)	19	38396041	38401782	5742	1	ENSMUSG00000044026	ENSMUST00000236865	1293	240660	Slc35g1	solute carrier family 35, member G1
11	118202335	118202635	301	*	4.58537	3.99851	5.00135	-1.03958	0.00338558	0.0528789	Intron (ENSMUST00000100181/ENSMUSG00000017132, intron 1 of 13)	11	118204712	118205179	468	2	ENSMUSG00000080810	ENSMUST00000118713	2544
6	51465794	51466094	301	*	3.89387	4.46169	2.94409	1.46034	0.00338575	0.0528789	Exon (ENSMUST00000205204/ENSMUSG00000004980, exon 4 of 4)	6	51464632	51466237	1606	2	ENSMUSG00000004980	ENSMUST00000204902	143	53379	Hnrnpa2b1	heterogeneous nuclear ribonucleoprotein A2/B1
16	8737601	8737901	301	*	5.77204	6.10031	5.34636	0.709659	0.00339048	0.0528789	Intron (ENSMUST00000160405/ENSMUSG00000022710, intron 2 of 31)	16	8690146	8738342	48197	2	ENSMUSG00000022710	ENSMUST00000161046	441	252870	Usp7	ubiquitin specific peptidase 7
8	107403169	107403469	301	*	4.55383	4.9999	3.90472	1.04649	0.00339175	0.0528789	Promoter (<=1kb)	8	107388225	107403206	14982	2	ENSMUSG00000003849	ENSMUST00000003947	0	18104	Nqo1	NAD(P)H dehydrogenase, quinone 1
8	120114196	120114496	301	*	6.44063	6.71921	6.09508	0.580678	0.00339282	0.0528789	Promoter (<=1kb)	8	120114153	120165304	51152	1	ENSMUSG00000031824	ENSMUST00000108951	43	234797	6430548M08Rik	RIKEN cDNA 6430548M08 gene
8	70873119	70873419	301	*	6.86691	7.1363	6.5354	0.557695	0.00339365	0.0528789	Promoter (<=1kb)	8	70869988	70873383	3396	2	ENSMUSG00000007721	ENSMUST00000212680	0	234388	Ccdc124	coiled-coil domain containing 124
19	5751309	5751609	301	*	3.45822	2.22653	4.11282	-1.90046	0.00339701	0.052896	Exon (ENSMUST00000237317/ENSMUSG00000024940, exon 15 of 19)	19	5750651	5751245	595	1	ENSMUSG00000024940	ENSMUST00000237128	658	16998	Ltbp3	latent transforming growth factor beta binding protein 3
2	168968027	168968327	301	*	3.37285	4.09181	1.87466	2.13761	0.00340444	0.0529764	Distal Intergenic	2	168978268	168978906	639	1	ENSMUSG00000086348	ENSMUST00000140241	-9941	75508	1700017J07Rik	RIKEN cDNA 1700017J07 gene
10	81407547	81407847	301	*	3.36842	4.05896	1.9955	1.988	0.00340695	0.0529802	Promoter (<=1kb)	10	81400769	81407641	6873	2	ENSMUSG00000055053	ENSMUST00000140916	0	18029	Nfic	nuclear factor I/C
9	10904626	10904926	301	*	4.7471	4.22234	5.13107	-0.946617	0.00341709	0.0531025	Promoter (<=1kb)	9	9660891	10904726	1243836	2	ENSMUSG00000039488	ENSMUST00000162484	0	244682	Cntn5	contactin 5
8	95182076	95182376	301	*	3.41518	4.11731	1.99278	2.04862	0.00342069	0.053123	Intron (ENSMUST00000212424/ENSMUSG00000031788, intron 1 of 4)	8	95110249	95182791	72543	2	ENSMUSG00000031788	ENSMUST00000212424	415	16582	Kifc3	kinesin family member C3
6	87847706	87848006	301	*	3.32126	4.03017	1.86891	2.0821	0.00343004	0.0532328	Promoter (1-2kb)	6	87845530	87846317	788	2	ENSMUSG00000030057	ENSMUST00000204104	-1389	12785	Cnbp	cellular nucleic acid binding protein
4	144404443	144404743	301	*	3.83909	4.41197	2.87474	1.47917	0.00344197	0.0533433	Promoter (<=1kb)	4	144404868	144406301	1434	1	ENSMUSG00000028590	ENSMUST00000133334	-125
4	127341889	127342189	301	*	4.25984	4.73606	3.54414	1.14103	0.00344367	0.0533433	Distal Intergenic	4	127325235	127330844	5610	2	ENSMUSG00000042367	ENSMUST00000046532	-11045	14620	Gjb3	gap junction protein, beta 3
10	44005817	44006117	301	*	4.7178	4.17052	5.11362	-0.980682	0.00344456	0.0533433	Promoter (1-2kb)	10	43950638	44004369	53732	2	ENSMUSG00000019866	ENSMUST00000020017	-1448	11630	Crybg1	crystallin beta-gamma domain containing 1
17	80479833	80480133	301	*	6.12952	6.42118	5.76355	0.613913	0.00344629	0.0533433	Promoter (<=1kb)	17	80393751	80479969	86219	2	ENSMUSG00000024241	ENSMUST00000068714	0	20662	Sos1	SOS Ras/Rac guanine nucleotide exchange factor 1
7	127213677	127213977	301	*	4.44964	4.90944	3.77076	1.08922	0.00345195	0.0533954	Promoter (<=1kb)	7	127213896	127214287	392	1	ENSMUSG00000030672	ENSMUST00000139613	0	17907	Mylpf	myosin light chain, phosphorylatable, fast skeletal muscle
17	17375650	17375950	301	*	3.54239	4.22248	2.21237	1.93961	0.00346673	0.0535886	Intron (ENSMUST00000024620/ENSMUSG00000116564, intron 1 of 9)	17	17374590	17385662	11073	1	ENSMUSG00000116564	ENSMUST00000232199	1060	67045	Riok2	RIO kinase 2
14	79836236	79836536	301	*	3.58039	2.49988	4.19122	-1.71166	0.0034714	0.0536253	Promoter (<=1kb)	14	79836712	79958726	122015	1	ENSMUSG00000097927	ENSMUST00000180427	-176
8	66860252	66860552	301	*	5.50264	5.84097	5.05985	0.736393	0.00347976	0.053719	Promoter (<=1kb)	8	66860217	66890564	30348	1	ENSMUSG00000014907	ENSMUST00000118009	35	234344	Naf1	nuclear assembly factor 1 ribonucleoprotein
17	47167059	47167359	301	*	3.02845	3.84008	0.998152	2.72581	0.00348722	0.0537781	Intron (ENSMUST00000188947/ENSMUSG00000064043, intron 2 of 11)	17	47141216	47318790	177575	1	ENSMUSG00000064043	ENSMUST00000191153	25843	224829	Trerf1	transcriptional regulating factor 1
6	5298119	5298419	301	*	4.46821	3.87372	4.88799	-1.05042	0.00348819	0.0537781	Promoter (<=1kb)	6	5270173	5298330	28158	2	ENSMUSG00000032667	ENSMUST00000123838	0	330260	Pon2	paraoxonase 2
4	124741879	124742179	301	*	3.66767	4.30188	2.50898	1.72859	0.00349264	0.0538111	Promoter (<=1kb)	4	124741878	124751441	9564	1	ENSMUSG00000028894	ENSMUST00000154229	1	16330	Inpp5b	inositol polyphosphate-5-phosphatase B
15	74708969	74709269	301	*	6.08152	6.38186	5.70175	0.636294	0.00349887	0.0538716	Promoter (<=1kb)	15	74709161	74710372	1212	1	ENSMUSG00000044276	ENSMUST00000185751	0	66769	4933427E11Rik	RIKEN cDNA 4933427E11 gene
5	53561026	53561326	301	*	3.0284	3.84002	0.998152	2.72576	0.00350406	0.053916	Intron (ENSMUST00000201991/ENSMUSG00000039191, intron 1 of 6)	5	53555834	53657358	101525	1	ENSMUSG00000039191	ENSMUST00000087360	5192	19664	Rbpj	recombination signal binding protein for immunoglobulin kappa J region
18	61640422	61640722	301	*	3.324	4.03248	1.8736	2.07976	0.0035173	0.0540339	Intron (ENSMUST00000183083/ENSMUSG00000098098, intron 1 of 2)	18	61639653	61647472	7820	1	ENSMUSG00000098098	ENSMUST00000183087	769
5	67269182	67269482	301	*	3.36834	4.05773	2.00025	1.98209	0.00351834	0.0540339	Intron (ENSMUST00000037918/ENSMUSG00000037720, intron 6 of 7)	5	67259971	67261262	1292	2	ENSMUSG00000107319	ENSMUST00000201816	-7920
5	74535655	74535955	301	*	6.37793	6.65839	6.02946	0.585429	0.00351867	0.0540339	Promoter (<=1kb)	5	74535684	74585431	49748	1	ENSMUSG00000029227	ENSMUST00000121950	0	66899	Fip1l1	FIP1 like 1 (S. cerevisiae)
6	24955469	24955769	301	*	5.28077	4.84215	5.61667	-0.814371	0.00352886	0.054129	5' UTR	6	24951141	24956297	5157	2	ENSMUSG00000048022	ENSMUST00000127247	528	319832	Tmem229a	transmembrane protein 229A
3	121517498	121517798	301	*	4.32297	4.79057	3.62677	1.11347	0.00353075	0.054129	Intron (ENSMUST00000039197/ENSMUSG00000039865, intron 5 of 14)	3	121520151	121527107	6957	2	ENSMUSG00000039865	ENSMUST00000199422	9309	213603	Slc44a3	solute carrier family 44, member 3
7	82783664	82783964	301	*	2.49846	3.41082	0	3.72687	0.00353406	0.054129	Distal Intergenic	7	82743368	82755644	12277	2	ENSMUSG00000086690	ENSMUST00000144828	-28020	77800	4933406J10Rik	RIKEN cDNA 4933406J10 gene
4	151881835	151882135	301	*	3.82462	4.39257	2.87447	1.46017	0.00353624	0.054129	Distal Intergenic	4	151059525	151861876	802352	2	ENSMUSG00000014592	ENSMUST00000097774	-19959	100072	Camta1	calmodulin binding transcription activator 1
4	57016657	57016957	301	*	3.54217	2.41662	4.16667	-1.76859	0.00353664	0.054129	Exon (ENSMUST00000095076/ENSMUSG00000028434, exon 22 of 26)	4	56995678	57027676	31999	2	ENSMUSG00000028434	ENSMUST00000044022	10719	54357	Epb41l4b	erythrocyte membrane protein band 4.1 like 4b
4	137681546	137681846	301	*	4.52438	3.90462	4.9565	-1.08804	0.00353876	0.054129	Promoter (<=1kb)	4	137681667	137729860	48194	1	ENSMUSG00000041351	ENSMUST00000047243	0	110351	Rap1gap	Rap1 GTPase-activating protein
10	99262643	99262943	301	*	3.70067	4.29777	2.66365	1.57303	0.00355321	0.0543143	Promoter (<=1kb)	10	99263231	99267488	4258	1	ENSMUSG00000019960	ENSMUST00000020118	-288	67603	Dusp6	dual specificity phosphatase 6
11	116841682	116841982	301	*	3.03248	1.22299	3.81044	-2.5663	0.00355701	0.0543368	Promoter (<=1kb)	11	116837435	116841251	3817	2	ENSMUSG00000056962	ENSMUST00000124831	-431	107817	Jmjd6	jumonji domain containing 6
14	120911521	120911821	301	*	5.67394	6.01006	5.23494	0.730651	0.0035622	0.054361	Intron (ENSMUST00000032898/ENSMUSG00000030662, intron 1 of 25)	14	120911233	120927604	16372	1	ENSMUSG00000030662	ENSMUST00000227270	288	70572	Ipo5	importin 5
8	106611459	106611759	301	*	3.95422	4.50441	3.05377	1.3949	0.00356324	0.054361	Intron (ENSMUST00000000312/ENSMUSG00000000303, intron 2 of 15)	8	106604143	106653919	49777	1	ENSMUSG00000000303	ENSMUST00000136580	7316	12550	Cdh1	cadherin 1
4	130521444	130521744	301	*	3.87345	4.43552	2.94005	1.43832	0.00358024	0.0545847	Distal Intergenic	4	130539063	130557988	18926	2	ENSMUSG00000078532	ENSMUST00000180498	36244	67149	Nkain1	Na+/K+ transporting ATPase interacting 1
18	65581733	65582033	301	*	3.62513	4.24965	2.49952	1.68608	0.00359123	0.0547165	Promoter (<=1kb)	18	65581742	65625334	43593	1	ENSMUSG00000042439	ENSMUST00000182979	0	328977	Zfp532	zinc finger protein 532
3	113629417	113629717	301	*	3.87612	4.4392	2.93986	1.44218	0.00359519	0.0547411	Intron (ENSMUST00000153853/ENSMUSG00000027981, intron 1 of 13)	3	113605067	113629900	24834	2	ENSMUSG00000027981	ENSMUST00000153853	183	67225	Rnpc3	RNA-binding region (RNP1, RRM) containing 3
7	123214555	123214855	301	*	3.54408	4.22316	2.21811	1.93461	0.00360868	0.0549107	Promoter (<=1kb)	7	123214780	123265680	50901	1	ENSMUSG00000030769	ENSMUST00000131933	0	233836	Slc5a11	solute carrier family 5 (sodium/glucose cotransporter), member 11
11	16261137	16261437	301	*	2.89987	0.742692	3.72834	-2.93588	0.00363056	0.0551992	Intron (ENSMUST00000109645/ENSMUSG00000048834, intron 2 of 4)	11	16260591	16282218	21628	1	ENSMUSG00000048834	ENSMUST00000208440	546	211739	Vstm2a	V-set and transmembrane domain containing 2A
13	92844765	92845065	301	*	5.4384	5.03135	5.75551	-0.764452	0.00363237	0.0551992	Promoter (<=1kb)	13	92844787	92858230	13444	1	ENSMUSG00000021704	ENSMUST00000076169	0	382793	Mtx3	metaxin 3
8	120101131	120101431	301	*	6.70246	6.9785	6.36081	0.574391	0.00363565	0.0552133	Promoter (<=1kb)	8	120080890	120101482	20593	2	ENSMUSG00000031823	ENSMUST00000034280	51	102193	Zdhhc7	zinc finger, DHHC domain containing 7
14	63164617	63164917	301	*	4.40389	4.85896	3.73537	1.07402	0.00364243	0.0552802	Promoter (<=1kb)	14	63145150	63164925	19776	2	ENSMUSG00000021273	ENSMUST00000238526	8	14137	Fdft1	farnesyl diphosphate farnesyl transferase 1
10	18743503	18743803	301	*	4.51211	3.90684	4.9372	-1.06659	0.00364495	0.0552825	Promoter (<=1kb)	10	18589403	18743753	154351	2	ENSMUSG00000019852	ENSMUST00000019999	0	215821	Arfgef3	ARFGEF family member 3
13	97297045	97297345	301	*	2.65949	3.54067	0	3.34757	0.00364746	0.0552847	Distal Intergenic	13	97283183	97285560	2378	1	ENSMUSG00000097932	ENSMUST00000181148	13862
16	92300972	92301272	301	*	4.41594	3.77	4.86053	-1.1259	0.00365541	0.0553595	Promoter (<=1kb)	16	92301286	92313041	11756	1	ENSMUSG00000051989	ENSMUST00000063641	-14	68936	Smim11	small integral membrane protein 11
10	19934381	19934681	301	*	5.90028	6.21086	5.50395	0.662878	0.00365834	0.0553595	Promoter (<=1kb)	10	19934472	20142753	208282	1	ENSMUSG00000071369	ENSMUST00000095806	0	26408	Map3k5	mitogen-activated protein kinase kinase kinase 5
18	37766019	37766319	301	*	4.10177	4.60519	3.32193	1.23051	0.00365951	0.0553595	5' UTR	18	37765773	37770124	4352	1	ENSMUSG00000102428	ENSMUST00000193045	246	93724	Pcdhga12	protocadherin gamma subfamily A, 12
8	109778852	109779152	301	*	6.67562	6.95152	6.33418	0.574031	0.0036622	0.0553645	Promoter (<=1kb)	8	109778897	109805668	26772	1	ENSMUSG00000031731	ENSMUST00000173200	0	11765	Ap1g1	adaptor protein complex AP-1, gamma 1 subunit
18	32559628	32559928	301	*	3.71477	2.73394	4.29329	-1.58374	0.00367088	0.0553951	Promoter (<=1kb)	18	32528325	32559980	31656	2	ENSMUSG00000090523	ENSMUST00000174000	52	71683	Gypc	glycophorin C
3	10367015	10367315	301	*	5.28691	5.6456	4.80845	0.791882	0.003671	0.0553951	Promoter (<=1kb)	3	10366958	10428856	61899	1	ENSMUSG00000027536	ENSMUST00000191826	57	66371	Chmp4c	charged multivesicular body protein 4C
2	152741688	152741988	301	*	3.58095	4.24521	2.313	1.86404	0.00367166	0.0553951	Promoter (3-4kb)	2	152745707	152746307	601	1	ENSMUSG00000082318	ENSMUST00000121985	-3719
17	34204509	34204809	301	*	4.66314	4.08999	5.07224	-1.01939	0.00367372	0.0553951	Promoter (<=1kb)	17	34204567	34216318	11752	1	ENSMUSG00000024339	ENSMUST00000127543	0	21355	Tap2	transporter 2, ATP-binding cassette, sub-family B (MDR/TAP)
10	81291114	81291414	301	*	3.99944	3.17126	4.52225	-1.38111	0.00367621	0.0553969	Promoter (<=1kb)	10	81273207	81291267	18061	2	ENSMUSG00000034917	ENSMUST00000045744	0	27375	Tjp3	tight junction protein 3
8	80057584	80057884	301	*	5.49623	5.85523	5.01721	0.793103	0.00368523	0.0554807	5' UTR	8	79965853	80058006	92154	2	ENSMUSG00000064325	ENSMUST00000079038	122	15245	Hhip	Hedgehog-interacting protein
3	135505702	135506002	301	*	3.69929	4.32168	2.58079	1.67808	0.00368652	0.0554807	Intron (ENSMUST00000131610/ENSMUSG00000028164, intron 1 of 13)	3	135495653	135495883	231	1	ENSMUSG00000083045	ENSMUST00000120489	10049
8	92357939	92358239	301	*	5.05268	5.45027	4.50201	0.902025	0.00369184	0.0555251	5' UTR	8	92357749	92361456	3708	1	ENSMUSG00000031737	ENSMUST00000034184	190	54352	Irx5	Iroquois homeobox 5
8	70234329	70234629	301	*	5.83693	6.15598	5.42668	0.68514	0.00369701	0.055567	Promoter (<=1kb)	8	70220172	70234466	14295	2	ENSMUSG00000002343	ENSMUST00000019679	0	76813	Armc6	armadillo repeat containing 6
15	74519143	74519443	301	*	4.83319	5.23576	4.27284	0.916018	0.00370435	0.0556415	Intron (ENSMUST00000042035/ENSMUSG00000034730, intron 1 of 30)	15	74516831	74589464	72634	1	ENSMUSG00000034730	ENSMUST00000187485	2312	107831	Adgrb1	adhesion G protein-coupled receptor B1
8	46686782	46687082	301	*	5.1304	5.51313	4.60795	0.859306	0.00371632	0.0557601	Intron (ENSMUST00000208508/ENSMUSG00000097534, intron 2 of 4)	8	46668808	46739508	70701	2	ENSMUSG00000097534	ENSMUST00000208508	52426	100503498	Gm16675	predicted gene, 16675
17	34941517	34941817	301	*	3.68055	2.65721	4.27321	-1.63911	0.00371702	0.0557601	Distal Intergenic	17	34950952	34951017	66	2	ENSMUSG00000093009	ENSMUST00000175268	9200	100217427	Snord52	small nucleolar RNA, C/D box 52
15	97361376	97361676	301	*	3.11342	3.8711	1.42016	2.35574	0.00372176	0.0557953	Intron (ENSMUST00000059433/ENSMUSG00000044250, intron 4 of 5)	15	97361217	97384349	23133	1	ENSMUSG00000044250	ENSMUST00000226495	159	239647	Pced1b	PC-esterase domain containing 1B
11	116220661	116220961	301	*	2.81034	0.739093	3.62759	-2.83963	0.00373152	0.0559058	3' UTR	11	116216540	116220287	3748	1	ENSMUSG00000092300	ENSMUST00000173567	4121	69681	Cdk3	cyclin-dependent kinase 3
1	58795579	58795879	301	*	4.41786	4.87827	3.73764	1.09099	0.00375885	0.0562555	5' UTR	1	58795477	58846754	51278	1	ENSMUSG00000026029	ENSMUST00000191201	102	12370	Casp8	caspase 8
2	18057291	18057591	301	*	4.99206	5.38	4.4598	0.873942	0.00375968	0.0562555	Promoter (<=1kb)	2	18057846	18057903	58	1	ENSMUSG00000099050	ENSMUST00000183376	-255	102466840	Mir7655	microRNA 7655
7	127929686	127929986	301	*	4.31905	3.66261	4.76854	-1.14064	0.00377073	0.0563645	5' UTR	7	127926762	127930095	3334	2	ENSMUSG00000030800	ENSMUST00000206568	109	76560	Prss8	protease, serine 8 (prostasin)
19	43522430	43522730	301	*	3.36647	4.08515	1.86963	2.13594	0.00377179	0.0563645	Intron (ENSMUST00000026196/ENSMUSG00000025190, intron 1 of 8)	19	43512254	43524485	12232	2	ENSMUSG00000025190	ENSMUST00000124954	1755	14718	Got1	glutamic-oxaloacetic transaminase 1, soluble
11	86257105	86257405	301	*	5.3697	5.71967	4.90667	0.767963	0.00377772	0.0564171	Promoter (<=1kb)	11	86256353	86257340	988	2	ENSMUSG00000018068	ENSMUST00000130614	0	70422	Ints2	integrator complex subunit 2
15	102966985	102967285	301	*	3.85795	3.00269	4.39124	-1.4169	0.00378744	0.056526	Promoter (<=1kb)	15	102967443	103015676	48234	1	ENSMUSG00000022485	ENSMUST00000174869	-158	15424	Hoxc5	homeobox C5
X	136115806	136116106	301	*	3.48121	4.14324	2.22175	1.85163	0.00379125	0.0565387	Distal Intergenic	20	136104603	136115420	10818	1	ENSMUSG00000087553	ENSMUST00000147100	11203	70491	5730412P04Rik	RIKEN cDNA 5730412P04 gene
9	13826851	13827151	301	*	5.47587	5.82509	5.01416	0.766072	0.00379313	0.0565387	Promoter (<=1kb)	9	13807792	13826991	19200	2	ENSMUSG00000031922	ENSMUST00000142494	0	74360	Cep57	centrosomal protein 57
9	75625819	75626119	301	*	5.7603	6.08226	5.3452	0.6928	0.00380765	0.0567148	Promoter (<=1kb)	9	75625759	75637308	11550	1	ENSMUSG00000032184	ENSMUST00000214961	60	70082	Lysmd2	LysM, putative peptidoglycan-binding, domain containing 2
2	94010402	94010702	301	*	5.92726	6.23681	5.53262	0.660185	0.0038098	0.0567148	Promoter (<=1kb)	2	93996178	94010431	14254	2	ENSMUSG00000040174	ENSMUST00000138046	0	69113	Alkbh3	alkB homolog 3, alpha-ketoglutarate-dependent dioxygenase
10	20166705	20167005	301	*	2.65833	3.53942	0	3.34633	0.00381276	0.0567227	Promoter (3-4kb)	10	20170780	20172679	1900	1	ENSMUSG00000019996	ENSMUST00000216909	-3775	17761	Map7	microtubule-associated protein 7
7	27446258	27446558	301	*	4.92306	4.41763	5.29662	-0.917548	0.00381528	0.0567241	Promoter (<=1kb)	7	27445954	27446517	564	2	ENSMUSG00000011751	ENSMUST00000137414	0	80297	Sptbn4	spectrin beta, non-erythrocytic 4
10	8835613	8835913	301	*	2.87185	3.69861	0.728223	2.83877	0.00382403	0.0567936	Intron (ENSMUST00000015449/ENSMUSG00000015305, intron 2 of 19)	10	8824011	8824147	137	2	ENSMUSG00000065692	ENSMUST00000083758	-11466	115487519	Gm25410	predicted gene, 25410
17	47920174	47920474	301	*	3.52255	4.16929	2.31955	1.78216	0.00382482	0.0567936	Promoter (1-2kb)	17	47922378	47923429	1052	1	ENSMUSG00000085932	ENSMUST00000122904	-1904
8	78427347	78427647	301	*	4.50179	4.95457	3.83825	1.06727	0.00382849	0.0567944	Distal Intergenic	8	78433010	78436645	3636	2	ENSMUSG00000031688	ENSMUST00000034115	8998	18997	Pou4f2	POU domain, class 4, transcription factor 2
13	30544946	30545246	301	*	6.13292	6.4265	5.76393	0.618842	0.00383183	0.0567944	Exon (ENSMUST00000042834/ENSMUSG00000038462, exon 1 of 2)	13	30540308	30545362	5055	2	ENSMUSG00000038462	ENSMUST00000042834	116	66694	Uqcrfs1	ubiquinol-cytochrome c reductase, Rieske iron-sulfur polypeptide 1
5	43807941	43808241	301	*	3.56398	4.19606	2.41265	1.71781	0.0038362	0.0567944	Exon (ENSMUST00000199304/ENSMUSG00000104701, exon 1 of 1)	5	43807705	43808743	1039	2	ENSMUSG00000104701	ENSMUST00000199304	502
8	122864835	122865135	301	*	3.17351	3.91053	1.58829	2.23378	0.00383779	0.0567944	Exon (ENSMUST00000034443/ENSMUSG00000031962, exon 11 of 14)	8	122870174	122895890	25717	1	ENSMUSG00000110440	ENSMUST00000211940	-5039
2	69592186	69592486	301	*	4.67365	5.10134	4.06305	0.990406	0.00383906	0.0567944	Distal Intergenic	2	69424340	69586065	161726	2	ENSMUSG00000027070	ENSMUST00000080953	-6121	14725	Lrp2	low density lipoprotein receptor-related protein 2
5	129874903	129875203	301	*	3.29497	4.02587	1.73995	2.20222	0.00383946	0.0567944	Promoter (<=1kb)	5	129866230	129874105	7876	2	ENSMUSG00000025537	ENSMUST00000154932	-798	18682	Phkg1	phosphorylase kinase gamma 1
8	85028970	85029270	301	*	3.30097	4.00409	1.87427	2.05094	0.00384556	0.0568486	Intron (ENSMUST00000047281/ENSMUSG00000041203, intron 1 of 2)	8	85026823	85030286	3464	1	ENSMUSG00000041203	ENSMUST00000047281	2147	68544	Trir	telomerase RNA component interacting RNase
8	72474741	72475041	301	*	7.04169	7.30162	6.72439	0.534115	0.00385935	0.0570164	Promoter (<=1kb)	8	72470930	72474836	3907	2	ENSMUSG00000052488	ENSMUST00000212870	0	27967	Cherp	calcium homeostasis endoplasmic reticulum protein
9	31914886	31915186	301	*	3.71886	2.73604	4.29804	-1.5864	0.00386322	0.0570374	Promoter (1-2kb)	9	31846044	31913462	67419	2	ENSMUSG00000032033	ENSMUST00000116615	-1424	12023	Barx2	BarH-like homeobox 2
19	6416926	6417226	301	*	3.36979	4.06102	1.99401	1.99153	0.00387015	0.0571037	Exon (ENSMUST00000131314/ENSMUSG00000084876, exon 2 of 2)	19	6409400	6418606	9207	2	ENSMUSG00000084876	ENSMUST00000124118	1380	105246848	Gm14965	predicted gene 14965
7	19212548	19212848	301	*	5.1438	5.51356	4.64535	0.822525	0.00387491	0.0571378	Promoter (<=1kb)	7	19212538	19224174	11637	1	ENSMUSG00000044317	ENSMUST00000060225	10	319197	Gpr4	G protein-coupled receptor 4
8	85700344	85700644	301	*	6.05219	6.35246	5.67255	0.636081	0.00387847	0.0571542	Exon (ENSMUST00000209479/ENSMUSG00000036902, exon 1 of 9)	8	85637237	85700754	63518	2	ENSMUSG00000036902	ENSMUST00000209479	110	74513	Neto2	neuropilin (NRP) and tolloid (TLL)-like 2
7	29908390	29908690	301	*	5.19053	5.5559	4.70003	0.810347	0.00388475	0.0572106	Promoter (<=1kb)	7	29908517	29916807	8291	1	ENSMUSG00000099689	ENSMUST00000186475	0	73729	Zfp383	zinc finger protein 383
8	105880968	105881268	301	*	6.56386	6.84535	6.21382	0.588137	0.00389702	0.0573551	Promoter (<=1kb)	8	105881077	105894908	13832	1	ENSMUSG00000036270	ENSMUST00000136048	0	234699	Edc4	enhancer of mRNA decapping 4
8	25847170	25847470	301	*	5.61064	5.94882	5.16812	0.736138	0.00390503	0.0574369	Intron (ENSMUST00000110610/ENSMUSG00000031575, intron 1 of 15)	8	25816876	25847694	30819	2	ENSMUSG00000031575	ENSMUST00000110610	224	23808	Ash2l	ASH2 like histone lysine methyltransferase complex subunit
1	132195705	132196005	301	*	3.92455	4.48374	2.99921	1.42805	0.00390903	0.0574541	Promoter (2-3kb)	1	132198088	132198184	97	1	ENSMUSG00000065435	ENSMUST00000083501	-2083	723818	Mir135b	microRNA 135b
3	129557840	129558140	301	*	3.77195	4.34512	2.80674	1.4796	0.00391321	0.0574541	Intron (ENSMUST00000199910/ENSMUSG00000041220, intron 1 of 3)	3	129552380	129628319	75940	1	ENSMUSG00000041220	ENSMUST00000198369	5460	170439	Elovl6	ELOVL family member 6, elongation of long chain fatty acids (yeast)
18	38680649	38680949	301	*	3.90816	4.46188	2.99803	1.40749	0.00391358	0.0574541	Intron (ENSMUST00000127448/ENSMUSG00000118257, intron 3 of 3)	18	38676718	38775996	99279	1	ENSMUSG00000118257	ENSMUST00000134388	3931
10	80295812	80296112	301	*	3.8545	3.00015	4.38745	-1.41564	0.00391843	0.0574566	Promoter (<=1kb)	10	80295977	80318263	22287	1	ENSMUSG00000020135	ENSMUST00000105359	0	23805	Apc2	APC regulator of WNT signaling pathway 2
8	117503628	117503928	301	*	3.54466	4.19502	2.32855	1.79879	0.00391867	0.0574566	Intron (ENSMUST00000081232/ENSMUSG00000034330, intron 1 of 32)	8	117498291	117635142	136852	1	ENSMUSG00000034330	ENSMUST00000081232	5337	234779	Plcg2	phospholipase C, gamma 2
2	28638724	28639024	301	*	3.736	2.80456	4.29736	-1.51847	0.00392994	0.057585	Promoter (2-3kb)	2	28641228	28672507	31280	1	ENSMUSG00000026812	ENSMUST00000156857	-2204	64930	Tsc1	TSC complex subunit 1
14	79768752	79769052	301	*	3.59953	2.21094	4.2938	-2.09567	0.00393236	0.057585	Promoter (<=1kb)	14	79769908	79772743	2836	1	ENSMUSG00000102774	ENSMUST00000194881	-856	102633266	Gm9748	predicted gene 9748
12	113097903	113098203	301	*	5.46013	5.04269	5.7835	-0.781091	0.0039413	0.0576797	Promoter (<=1kb)	12	113098278	113137205	38928	1	ENSMUSG00000021144	ENSMUST00000109727	-75	116870	Mta1	metastasis associated 1
5	106448136	106448436	301	*	3.87524	3.00418	4.41453	-1.43858	0.00394641	0.0577183	Distal Intergenic	5	106452523	106458166	5644	2	ENSMUSG00000034384	ENSMUST00000086795	9730	104382	Barhl2	BarH like homeobox 2
2	94265061	94265361	301	*	3.22816	3.97547	1.59034	2.29617	0.00395375	0.0577865	Promoter (<=1kb)	2	94160637	94264918	104282	2	ENSMUSG00000075020	ENSMUST00000211430	-143
5	28209740	28210040	301	*	5.02343	5.40506	4.50304	0.855928	0.00395601	0.0577865	Promoter (<=1kb)	5	28202449	28210022	7574	2	ENSMUSG00000044681	ENSMUST00000118882	0	269637	Cnpy1	canopy FGF signaling regulator 1
5	136919007	136919307	301	*	5.39823	5.75577	4.92183	0.788889	0.00396091	0.0578218	Promoter (<=1kb)	5	136919146	136937106	17961	1	ENSMUSG00000097908	ENSMUST00000181045	0	66752	4933404O12Rik	RIKEN cDNA 4933404O12 gene
8	118284334	118284634	301	*	4.70955	5.12829	4.11717	0.963542	0.00396658	0.057835	Intron (ENSMUST00000117160/ENSMUSG00000031841, intron 1 of 13)	8	118283797	119202402	918606	1	ENSMUSG00000031841	ENSMUST00000148836	537	12554	Cdh13	cadherin 13
9	110951287	110951587	301	*	3.68239	4.3211	2.50796	1.7487	0.00396782	0.057835	Promoter (<=1kb)	9	110951545	110984066	32522	1	ENSMUSG00000032495	ENSMUST00000035076	0	74249	Lrrc2	leucine rich repeat containing 2
5	113597011	113597311	301	*	3.221	1.57315	3.97022	-2.39104	0.00396924	0.057835	Distal Intergenic	5	113578788	113581866	3079	1	ENSMUSG00000063430	ENSMUST00000198673	18223	320916	Wscd2	WSC domain containing 2
12	84053366	84053666	301	*	3.75711	2.73932	4.34795	-1.63275	0.00397326	0.0578575	5' UTR	12	84039469	84053807	14339	2	ENSMUSG00000097762	ENSMUST00000180751	141
17	23541623	23541923	301	*	2.70313	0.416536	3.54714	-3.05726	0.00398573	0.0579781	Distal Intergenic	17	23550799	23565291	14493	1	ENSMUSG00000117322	ENSMUST00000233076	-8876	320020	6330415G19Rik	RIKEN cDNA 6330415G19 gene
8	120631826	120632126	301	*	3.97006	4.50401	3.11309	1.33601	0.00398651	0.0579781	Intron (ENSMUST00000127664/ENSMUSG00000092329, intron 1 of 15)	8	120608935	120634363	25429	2	ENSMUSG00000043687	ENSMUST00000144417	2237	68918	1190005I06Rik	RIKEN cDNA 1190005I06 gene
8	83332073	83332373	301	*	6.7848	7.05618	6.45026	0.562675	0.00399644	0.0580864	Promoter (<=1kb)	8	83324222	83332404	8183	2	ENSMUSG00000035151	ENSMUST00000141565	31	244548	Elmod2	ELMO/CED-12 domain containing 2
5	140332953	140333253	301	*	2.9646	3.76801	0.991968	2.66044	0.00400043	0.0581083	Intron (ENSMUST00000198660/ENSMUSG00000036639, intron 1 of 3)	5	140332424	140335696	3273	1	ENSMUSG00000036639	ENSMUST00000110825	529	17766	Nudt1	nudix (nucleoside diphosphate linked moiety X)-type motif 1
7	5066058	5066358	301	*	4.28433	4.77281	3.5402	1.18153	0.00400326	0.0581131	Promoter (<=1kb)	7	5067228	5079494	12267	1	ENSMUSG00000030435	ENSMUST00000207498	-870	22185	U2af2	U2 small nuclear ribonucleoprotein auxiliary factor (U2AF) 2
6	72901937	72902237	301	*	3.47962	4.16761	2.11731	1.97743	0.00400642	0.058123	Promoter (1-2kb)	6	72841114	72899979	58866	2	ENSMUSG00000055239	ENSMUST00000068697	-1958	74287	Kcmf1	potassium channel modulatory factor 1
8	95352393	95352693	301	*	6.55601	6.83957	6.20274	0.593418	0.00402681	0.0583824	5' UTR	8	95352268	95375080	22813	1	ENSMUSG00000031790	ENSMUST00000034243	125	17388	Mmp15	matrix metallopeptidase 15
19	6909643	6909943	301	*	5.72694	6.04322	5.32126	0.6777	0.00403567	0.0584747	Promoter (<=1kb)	19	6909698	6911049	1352	1	ENSMUSG00000038812	ENSMUST00000088257	0	67674	Trmt112	tRNA methyltransferase 11-2
1	166154763	166155063	301	*	4.38106	4.84087	3.70216	1.08889	0.0040424	0.0585106	Intron (ENSMUST00000060833/ENSMUSG00000000544, intron 3 of 6)	1	166130467	166166509	36043	1	ENSMUSG00000000544	ENSMUST00000166860	24296	59290	Gpa33	glycoprotein A33 (transmembrane)
11	88534606	88534906	301	*	3.50575	4.17503	2.21849	1.88644	0.00404316	0.0585106	Intron (ENSMUST00000107909/ENSMUSG00000069769, intron 6 of 13)	11	88365515	88590147	224633	2	ENSMUSG00000069769	ENSMUST00000148013	55241	76626	Msi2	musashi RNA-binding protein 2
8	68276904	68277204	301	*	4.71694	5.12665	4.14259	0.936667	0.00404628	0.0585195	Intron (ENSMUST00000066594/ENSMUSG00000053886, intron 1 of 8)	8	68276567	68347694	71128	1	ENSMUSG00000053886	ENSMUST00000066594	337	72281	Sh2d4a	SH2 domain containing 4A
10	67102120	67102420	301	*	4.11618	4.62436	3.32467	1.24685	0.0040559	0.0585581	Intron (ENSMUST00000174062/ENSMUSG00000037876, intron 1 of 2)	10	67009189	67096945	87757	2	ENSMUSG00000019873	ENSMUST00000020023	-5175	28193	Reep3	receptor accessory protein 3
17	29849125	29849425	301	*	3.39098	2.11941	4.05618	-1.94842	0.00405623	0.0585581	Exon (ENSMUST00000171691/ENSMUSG00000043557, exon 6 of 17)	17	29849640	29850541	902	2	ENSMUSG00000043557	ENSMUST00000234114	1116	74762	Mdga1	MAM domain containing glycosylphosphatidylinositol anchor 1
11	74619718	74620018	301	*	5.47196	5.81809	5.01567	0.757584	0.00405647	0.0585581	5' UTR	11	74619605	74641516	21912	1	ENSMUSG00000069814	ENSMUST00000100866	113	432582	Ccdc92b	coiled-coil domain containing 92B
8	83442051	83442351	301	*	6.46981	6.77017	6.09002	0.63662	0.0040636	0.0586248	Promoter (<=1kb)	8	83430510	83442450	11941	2	ENSMUSG00000063253	ENSMUST00000212449	99	56367	Scoc	short coiled-coil protein
11	95308309	95308609	301	*	4.0725	4.60452	3.22056	1.32995	0.00407065	0.0586902	Intron (ENSMUST00000072621/ENSMUSG00000038909, intron 1 of 13)	11	95303172	95309513	6342	2	ENSMUSG00000038909	ENSMUST00000154327	904	217127	Kat7	K(lysine) acetyltransferase 7
11	62512316	62512616	301	*	4.44879	4.89149	3.80685	1.03557	0.00408162	0.0588121	Intron (ENSMUST00000014389/ENSMUSG00000014245, intron 6 of 6)	11	62522741	62523542	802	1	ENSMUSG00000086636	ENSMUST00000143382	-10125
11	8624367	8624667	301	*	5.67776	6.00756	5.24952	0.713619	0.00409924	0.0590296	5' UTR	11	8431652	8624887	193236	2	ENSMUSG00000020422	ENSMUST00000239091	220	319939	Tns3	tensin 3
15	80395267	80395567	301	*	4.41627	3.80702	4.84331	-1.07205	0.00410373	0.0590431	3' UTR	15	80389328	80393820	4493	1	ENSMUSG00000022416	ENSMUST00000160175	5939	239556	Cacna1i	calcium channel, voltage-dependent, alpha 1I subunit
1	39655949	39656249	301	*	4.32343	4.79201	3.62501	1.11667	0.00410753	0.0590431	Promoter (4-5kb)	1	39618406	39651474	33069	2	ENSMUSG00000050967	ENSMUST00000053355	-4475	263764	Creg2	cellular repressor of E1A-stimulated genes 2
4	148075245	148075545	301	*	3.52513	4.1995	2.21792	1.9113	0.00410776	0.0590431	Promoter (<=1kb)	4	148071607	148075420	3814	2	ENSMUSG00000078494	ENSMUST00000144031	0
15	45114276	45114576	301	*	4.31268	3.66537	4.75791	-1.12732	0.00411723	0.0591224	Exon (ENSMUST00000022967/ENSMUSG00000022342, exon 1 of 3)	15	45106284	45114827	8544	2	ENSMUSG00000022342	ENSMUST00000022967	251	67498	Kcnv1	potassium channel, subfamily V, member 1
5	143364147	143364447	301	*	3.80686	2.93923	4.34485	-1.43326	0.00411835	0.0591224	Intron (ENSMUST00000110733/ENSMUSG00000010825, intron 2 of 21)	5	143363908	143391798	27891	1	ENSMUSG00000010825	ENSMUST00000010969	239	170935	Grid2ip	glutamate receptor, ionotropic, delta 2 (Grid2) interacting protein 1
2	94001263	94001563	301	*	3.48248	4.16989	2.12262	1.97445	0.00413752	0.0593612	Exon (ENSMUST00000111240/ENSMUSG00000040174, exon 7 of 10)	2	93996247	94005187	8941	2	ENSMUSG00000040174	ENSMUST00000127231	3624	69113	Alkbh3	alkB homolog 3, alpha-ketoglutarate-dependent dioxygenase
11	98789289	98789589	301	*	5.09549	5.47191	4.58479	0.84126	0.00414811	0.0594766	Distal Intergenic	11	98795516	98807859	12344	1	ENSMUSG00000052915	ENSMUST00000037915	-5927	74026	Msl1	male specific lethal 1
11	48858029	48858329	301	*	4.36861	3.77251	4.78919	-1.05234	0.00415071	0.0594774	Promoter (4-5kb)	11	48843648	48853493	9846	2	ENSMUSG00000086245	ENSMUST00000156882	-4536
12	110696705	110697005	301	*	4.7216	4.19837	5.10475	-0.944188	0.00415361	0.0594824	Promoter (<=1kb)	12	110690605	110696395	5791	2	ENSMUSG00000021270	ENSMUST00000094361	-310	15519	Hsp90aa1	heat shock protein 90, alpha (cytosolic), class A member 1
1	86309709	86310009	301	*	4.15654	4.64446	3.41372	1.17889	0.00415654	0.0594879	Distal Intergenic	1	86303195	86304059	865	2	ENSMUSG00000099644	ENSMUST00000187004	-5650
1	51623665	51623965	301	*	2.78256	3.63499	0.420119	3.05963	0.00416493	0.0595354	Distal Intergenic	1	51509505	51596718	87214	2	ENSMUSG00000099413	ENSMUST00000189410	-26947	100045066	Gm17767	predicted gene, 17767
9	54559889	54560189	301	*	4.08621	3.36908	4.56305	-1.22645	0.00416496	0.0595354	Promoter (<=1kb)	9	54544794	54560218	15425	2	ENSMUSG00000037493	ENSMUST00000041901	29	56506	Cib2	calcium and integrin binding family member 2
10	10689170	10689470	301	*	3.60485	2.58177	4.19742	-1.63769	0.0041736	0.0595864	3' UTR	10	10681348	10681858	511	1	ENSMUSG00000078481	ENSMUST00000105564	7822
4	117494655	117494955	301	*	4.27491	4.80785	3.42056	1.33468	0.00417362	0.0595864	Promoter (<=1kb)	4	117490235	117495011	4777	2	ENSMUSG00000028677	ENSMUST00000123222	56	66743	Rnf220	ring finger protein 220
8	84501783	84502083	301	*	4.12927	4.66351	3.27155	1.33829	0.00418272	0.0596798	Intron (ENSMUST00000238701/ENSMUSG00000034656, intron 5 of 48)	8	84547094	84554084	6991	1	ENSMUSG00000034656	ENSMUST00000129620	-45011	12286	Cacna1a	calcium channel, voltage-dependent, P/Q type, alpha 1A subunit
7	29793038	29793338	301	*	4.50446	4.94058	3.87638	1.01551	0.00418984	0.0597405	Exon (ENSMUST00000032803/ENSMUSG00000047473, exon 5 of 5)	7	29798712	29799796	1085	2	ENSMUSG00000109565	ENSMUST00000208224	6458
9	118862864	118863164	301	*	3.87649	4.4392	2.94127	1.44078	0.00419209	0.0597405	Intron (ENSMUST00000044165/ENSMUSG00000039115, intron 23 of 27)	9	118872069	118897312	25244	1	ENSMUSG00000039115	ENSMUST00000155437	-8905	104099	Itga9	integrin alpha 9
2	164400566	164400866	301	*	4.41298	3.80796	4.83794	-1.06575	0.00421006	0.0599414	Promoter (2-3kb)	2	164403141	164414791	11651	1	ENSMUSG00000017007	ENSMUST00000137427	-2275	19668	Rbpjl	recombination signal binding protein for immunoglobulin kappa J region-like
3	122244886	122245186	301	*	2.9999	3.80878	0.989181	2.70359	0.00421167	0.0599414	Promoter (<=1kb)	3	122245557	122270732	25176	1	ENSMUSG00000028124	ENSMUST00000029769	-371	14630	Gclm	glutamate-cysteine ligase, modifier subunit
17	56007775	56008075	301	*	4.04283	4.56205	3.2238	1.28447	0.00421389	0.0599414	Promoter (1-2kb)	17	56009201	56016790	7590	1	ENSMUSG00000003199	ENSMUST00000149441	-1126	68047	Mpnd	MPN domain containing
2	84677599	84677899	301	*	5.66695	5.9918	5.24703	0.700388	0.0042337	0.0601866	5' UTR	2	84601439	84678041	76603	2	ENSMUSG00000101645	ENSMUST00000189772	142
10	7867508	7867808	301	*	4.48194	3.80992	4.93861	-1.16406	0.00425241	0.0604158	Exon (ENSMUST00000039484/ENSMUSG00000039981, exon 6 of 6)	10	7848361	7848481	121	2	ENSMUSG00000088857	ENSMUST00000158232	-19027	115487532	Gm24726	predicted gene, 24726
17	66234367	66234667	301	*	3.45776	2.32217	4.08523	-1.77993	0.00426234	0.0605201	Exon (ENSMUST00000233985/ENSMUSG00000117220, exon 3 of 5)	17	66232014	66234945	2932	2	ENSMUSG00000117220	ENSMUST00000233452	278
17	25723457	25723757	301	*	3.80347	4.38847	2.80337	1.52603	0.00426759	0.0605578	Promoter (2-3kb)	17	25719046	25720901	1856	2	ENSMUSG00000019214	ENSMUST00000167940	-2556	214901	Chtf18	CTF18, chromosome transmission fidelity factor 18
9	40877833	40878133	301	*	3.62352	2.58283	4.2218	-1.66085	0.00427301	0.0605909	3' UTR	9	40874127	40880057	5931	1	ENSMUSG00000054360	ENSMUST00000067375	3706	244813	Bsx	brain specific homeobox
3	105800695	105800995	301	*	4.92517	5.32332	4.37341	0.903313	0.00427511	0.0605909	Intron (ENSMUST00000090678/ENSMUSG00000068798, intron 1 of 7)	3	105728643	105801285	72643	2	ENSMUSG00000068798	ENSMUST00000197094	290	109905	Rap1a	RAS-related protein 1a
8	71272796	71273096	301	*	6.63891	6.90681	6.30965	0.553845	0.00428745	0.0607289	Promoter (<=1kb)	8	71251125	71272934	21810	2	ENSMUSG00000035439	ENSMUST00000035960	0	76478	Haus8	4HAUS augmin-like complex, subunit 8
3	63898864	63899164	301	*	5.26755	4.85766	5.58637	-0.768704	0.00429839	0.0608469	Intron (ENSMUST00000177143/ENSMUSG00000036834, intron 1 of 22)	3	63869450	63899373	29924	2	ENSMUSG00000036834	ENSMUST00000161052	209	269437	Plch1	phospholipase C, eta 1
17	87636162	87636462	301	*	4.40594	4.86097	3.7375	1.07391	0.00430933	0.06091	5' UTR	17	87636017	87641462	5446	1	ENSMUSG00000045394	ENSMUST00000234354	145	17075	Epcam	epithelial cell adhesion molecule
4	106622718	106623018	301	*	4.62558	4.08898	5.01582	-0.964197	0.0043194	0.06091	Exon (ENSMUST00000047922/ENSMUSG00000034919, exon 1 of 7)	4	106622432	106640189	17758	1	ENSMUSG00000034919	ENSMUST00000047922	286	230576	Ttc22	tetratricopeptide repeat domain 22
5	38319416	38319716	301	*	4.63502	4.11543	5.01623	-0.938355	0.00431946	0.06091	Promoter (<=1kb)	5	38319367	38322518	3152	1	ENSMUSG00000039358	ENSMUST00000041646	49	13492	Drd5	dopamine receptor D5
11	100493821	100494121	301	*	4.36888	4.82385	3.70057	1.07353	0.00431994	0.06091	Promoter (<=1kb)	11	100482259	100494199	11941	2	ENSMUSG00000020917	ENSMUST00000152969	78	104112	Acly	ATP citrate lyase
3	82074310	82074610	301	*	3.64653	2.66131	4.22654	-1.58867	0.00432001	0.06091	Promoter (<=1kb)	3	82051056	82074673	23618	2	ENSMUSG00000028005	ENSMUST00000193085	63	54195	Gucy1b1	guanylate cyclase 1, soluble, beta 1
5	31488232	31488532	301	*	5.48654	5.82353	5.04606	0.732735	0.00432004	0.06091	Promoter (<=1kb)	5	31486629	31487948	1320	2	ENSMUSG00000107142	ENSMUST00000202605	-284
18	77050259	77050559	301	*	3.73901	4.32368	2.73986	1.52396	0.0043211	0.06091	Promoter (2-3kb)	18	76977148	77047308	70161	2	ENSMUSG00000025420	ENSMUST00000126153	-2951	71206	Katnal2	katanin p60 subunit A-like 2
11	97450176	97450476	301	*	3.62534	2.57846	4.2256	-1.66896	0.00432511	0.0609298	Promoter (<=1kb)	11	97450160	97502400	52241	1	ENSMUSG00000049807	ENSMUST00000107601	16	58996	Arhgap23	Rho GTPase activating protein 23
3	79591496	79591796	301	*	5.81632	6.12259	5.42702	0.65147	0.00432823	0.060937	Promoter (<=1kb)	3	79591488	79595308	3821	1	ENSMUSG00000027804	ENSMUST00000162690	8	67738	Ppid	peptidylprolyl isomerase D (cyclophilin D)
8	105259325	105259625	301	*	5.49161	5.84088	5.02982	0.766232	0.00433122	0.0609424	3' UTR	8	105259190	105260120	931	2	ENSMUSG00000031887	ENSMUST00000136239	495	71609	Tradd	TNFRSF1A-associated via death domain
4	136290504	136290804	301	*	4.2727	3.62732	4.71703	-1.12428	0.00434822	0.0611448	Exon (ENSMUST00000069195/ENSMUSG00000051351, exon 3 of 3)	4	136286104	136290248	4145	1	ENSMUSG00000051351	ENSMUST00000130658	4400	22704	Zfp46	zinc finger protein 46
19	4803456	4803756	301	*	4.2089	4.69868	3.46171	1.18535	0.00435454	0.0611787	Promoter (1-2kb)	19	4792635	4802002	9368	2	ENSMUSG00000096370	ENSMUST00000177776	-1454	102902673	Gm21992	predicted gene 21992
2	170130714	170131014	301	*	6.39337	6.6741	6.04449	0.586116	0.00435587	0.0611787	Intron (ENSMUST00000063710/ENSMUSG00000052056, intron 1 of 5)	2	170108643	170131220	22578	2	ENSMUSG00000052056	ENSMUST00000063710	206	228913	Zfp217	zinc finger protein 217
X	98150936	98151236	301	*	3.29625	1.87367	3.99843	-2.12934	0.00436726	0.0612697	Exon (ENSMUST00000052837/ENSMUSG00000046532, exon 1 of 8)	20	98148769	98323215	174447	1	ENSMUSG00000046532	ENSMUST00000052837	2167	11835	Ar	androgen receptor
8	78147362	78147662	301	*	3.69941	4.2953	2.66613	1.56811	0.0043676	0.0612697	Distal Intergenic	8	78107960	78108110	151	1	ENSMUSG00000109948	ENSMUST00000210236	39402
12	91587613	91587913	301	*	3.5227	4.17075	2.31499	1.78813	0.00437437	0.0613256	Intron (ENSMUST00000021345/ENSMUSG00000020962, intron 1 of 8)	12	91586625	91589639	3015	2	ENSMUSG00000020962	ENSMUST00000163693	1726	83602	Gtf2a1	general transcription factor II A, 1
8	70042441	70042741	301	*	6.7066	6.97478	6.37693	0.554583	0.00437886	0.0613256	Promoter (<=1kb)	8	70016123	70042685	26563	2	ENSMUSG00000031858	ENSMUST00000168013	0	74549	Mau2	MAU2 sister chromatid cohesion factor
5	21674786	21675086	301	*	2.73625	0.420547	3.58355	-3.08938	0.00437946	0.0613256	Intron (ENSMUST00000115217/ENSMUSG00000044968, intron 3 of 4)	5	21689541	21690175	635	1	ENSMUSG00000081242	ENSMUST00000120619	-14455
1	120603480	120603780	301	*	4.04593	3.32074	4.52627	-1.23763	0.00439768	0.0615437	Exon (ENSMUST00000079721/ENSMUSG00000058665, exon 1 of 2)	1	120602418	120607992	5575	1	ENSMUSG00000058665	ENSMUST00000079721	1062	13798	En1	engrailed 1
19	5406930	5407230	301	*	4.36922	3.73942	4.80617	-1.10203	0.00440472	0.0615502	Promoter (<=1kb)	19	5406886	5422209	15324	1	ENSMUSG00000086938	ENSMUST00000174415	44	74931	4930481A15Rik	RIKEN cDNA 4930481A15 gene
8	71923010	71923310	301	*	6.49908	6.77188	6.16239	0.566094	0.00440625	0.0615502	Intron (ENSMUST00000131544/ENSMUSG00000066880, intron 1 of 3)	8	71922852	71934629	11778	1	ENSMUSG00000066880	ENSMUST00000119003	158	170938	Zfp617	zinc finger protein 617
8	70302354	70302654	301	*	6.18619	6.48154	5.81439	0.623453	0.00440628	0.0615502	Promoter (<=1kb)	8	70302518	70312990	10473	1	ENSMUSG00000055681	ENSMUST00000066469	0	59042	Cope	coatomer protein complex, subunit epsilon
4	135397959	135398259	301	*	4.12776	3.41457	4.60288	-1.22113	0.00440868	0.0615502	Promoter (<=1kb)	4	135369576	135398190	28615	2	ENSMUSG00000043924	ENSMUST00000105859	0	230822	Ncmap	noncompact myelin associated protein
11	83427214	83427514	301	*	4.29741	3.5848	4.77227	-1.22137	0.00441284	0.0615716	Exon (ENSMUST00000052521/ENSMUSG00000020686, exon 2 of 6)	11	83421902	83429455	7554	2	ENSMUSG00000020686	ENSMUST00000052521	1941	237891	Gas2l2	growth arrest-specific 2 like 2
2	28911396	28911696	301	*	3.25184	1.87561	3.94318	-2.07262	0.00441577	0.0615756	Exon (ENSMUST00000050776/ENSMUSG00000026805, exon 2 of 3)	2	28907684	28912495	4812	2	ENSMUSG00000026805	ENSMUST00000124059	799	54422	Barhl1	BarH like homeobox 1
1	74391348	74391648	301	*	5.28569	5.6348	4.82417	0.765455	0.00442135	0.0616167	Promoter (<=1kb)	1	74391509	74397285	5777	1	ENSMUSG00000026176	ENSMUST00000027367	0	227292	Ctdsp1	CTD (carboxy-terminal domain, RNA polymerase II, polypeptide A) small phosphatase 1
5	35104255	35104555	301	*	4.64226	5.07211	4.0272	0.996896	0.00443055	0.0616414	Promoter (<=1kb)	5	35102509	35104540	2032	2	ENSMUSG00000029103	ENSMUST00000132754	0	16976	Lrpap1	low density lipoprotein receptor-related protein associated protein 1
12	108318390	108318690	301	*	3.73628	2.8056	4.29738	-1.51745	0.0044332	0.0616414	Exon (ENSMUST00000021685/ENSMUSG00000021260, exon 4 of 9)	12	108313779	108328030	14252	2	ENSMUSG00000097847	ENSMUST00000181875	9340
17	56124279	56124579	301	*	5.40277	4.98158	5.72839	-0.786975	0.00443324	0.0616414	Promoter (2-3kb)	17	56119678	56122001	2324	2	ENSMUSG00000037095	ENSMUST00000041357	-2278	76905	Lrg1	leucine-rich alpha-2-glycoprotein 1
9	75413765	75414065	301	*	2.62526	3.5041	0	3.31834	0.00443368	0.0616414	Intron (ENSMUST00000180574/ENSMUSG00000097021, intron 2 of 3)	9	75410184	75417709	7526	1	ENSMUSG00000097021	ENSMUST00000180533	3581	71274	4933433G15Rik	RIKEN cDNA 4933433G15 gene
8	60982912	60983212	301	*	6.69083	6.96185	6.35685	0.561707	0.0044428	0.0617314	Promoter (<=1kb)	8	60911923	60983239	71317	2	ENSMUSG00000004319	ENSMUST00000004430	27	12725	Clcn3	chloride channel, voltage-sensitive 3
17	47527246	47527546	301	*	3.28166	4.04001	1.58475	2.36572	0.00446288	0.0619683	Intron (ENSMUST00000182129/ENSMUSG00000034165, intron 1 of 5)	17	47505241	47598649	93409	1	ENSMUSG00000034165	ENSMUST00000182506	22005	12445	Ccnd3	cyclin D3
4	141573831	141574131	301	*	3.39178	4.059	2.11244	1.87444	0.0044668	0.0619683	Distal Intergenic	4	141590050	141596469	6420	2	ENSMUSG00000006219	ENSMUST00000137491	22338	74202	Fblim1	filamin binding LIM protein 1
8	71507680	71507980	301	*	5.20902	5.56423	4.73675	0.782108	0.00446781	0.0619683	Exon (ENSMUST00000048452/ENSMUSG00000034845, exon 3 of 6)	8	71497765	71511752	13988	2	ENSMUSG00000034845	ENSMUST00000048452	3772	84094	Plvap	plasmalemma vesicle associated protein
8	109868676	109868976	301	*	6.51707	6.81133	6.14701	0.620846	0.00447142	0.0619816	Promoter (<=1kb)	8	109868611	109944671	76061	1	ENSMUSG00000031732	ENSMUST00000034175	65	244650	Phlpp2	PH domain and leucine rich repeat protein phosphatase 2
1	120265017	120265317	301	*	5.29014	5.64243	4.82303	0.774205	0.00447641	0.0620139	Promoter (<=1kb)	1	120190757	120265255	74499	2	ENSMUSG00000026389	ENSMUST00000140490	0	68428	Steap3	STEAP family member 3
8	27263766	27264066	301	*	3.6074	4.22577	2.50227	1.65964	0.00448133	0.0620243	Promoter (<=1kb)	8	27264414	27275498	11085	1	ENSMUSG00000031490	ENSMUST00000210959	-348	13685	Eif4ebp1	eukaryotic translation initiation factor 4E binding protein 1
11	107354343	107354643	301	*	4.21304	4.70449	3.46192	1.19094	0.00448246	0.0620243	Intron (ENSMUST00000103064/ENSMUSG00000040430, intron 1 of 9)	11	107226257	107348130	121874	2	ENSMUSG00000040430	ENSMUST00000134763	-6213	71795	Pitpnc1	phosphatidylinositol transfer protein, cytoplasmic 1
18	80192375	80192675	301	*	3.98609	4.52551	3.11469	1.35579	0.00448789	0.0620626	3' UTR	18	80192659	80195203	2545	2	ENSMUSG00000024570	ENSMUST00000236460	2528	68731	Rbfa	ribosome binding factor A
8	95080441	95080741	301	*	5.79123	6.10307	5.39285	0.666068	0.00449147	0.0620753	Promoter (<=1kb)	8	95081186	95100211	19026	1	ENSMUSG00000031787	ENSMUST00000034239	-445	74187	Katnb1	katanin p80 (WD40-containing) subunit B 1
5	143121258	143121558	301	*	2.73703	3.58407	0.423728	3.0057	0.00449932	0.0621326	Distal Intergenic	5	142990893	143112994	122102	2	ENSMUSG00000045078	ENSMUST00000053498	-8264	108086	Rnf216	ring finger protein 216
7	45896425	45896725	301	*	3.50343	4.14407	2.32219	1.75451	0.00450193	0.0621326	Promoter (<=1kb)	7	45885222	45896699	11478	2	ENSMUSG00000040231	ENSMUST00000211254	0	58867	Syngr4	synaptogyrin 4
3	54156208	54156508	301	*	3.09344	1.42103	3.84728	-2.4142	0.00450392	0.0621326	Promoter (<=1kb)	3	54156373	54224237	67865	1	ENSMUSG00000027748	ENSMUST00000199359	0	22066	Trpc4	transient receptor potential cation channel, subfamily C, member 4
8	116946692	116946992	301	*	3.29355	3.99638	1.86811	2.04935	0.00450625	0.0621326	Intron (ENSMUST00000109099/ENSMUSG00000047388, intron 1 of 3)	8	116943393	116960445	17053	1	ENSMUSG00000047388	ENSMUST00000109099	3299	234776	Atmin	ATM interactor
14	32597508	32597808	301	*	4.00115	3.22229	4.50416	-1.3128	0.00451191	0.0621368	Promoter (1-2kb)	14	32599407	32649204	49798	1	ENSMUSG00000041730	ENSMUST00000187377	-1599	107751	Prrxl1	paired related homeobox protein-like 1
1	51746594	51746894	301	*	3.24728	3.99982	1.58184	2.32869	0.0045122	0.0621368	Promoter (<=1kb)	1	51697125	51746943	49819	2	ENSMUSG00000101741	ENSMUST00000186769	49
7	28739969	28740269	301	*	4.93041	5.34666	4.34302	0.956827	0.00451454	0.0621368	Promoter (<=1kb)	7	28739641	28740067	427	2	ENSMUSG00000045948	ENSMUST00000165246	0	24030	Mrps12	mitochondrial ribosomal protein S12
7	118597716	118598016	301	*	2.99542	1.21847	3.7679	-2.52854	0.00453504	0.0623822	Intron (ENSMUST00000098088/ENSMUSG00000030650, intron 1 of 21)	7	118597297	118675086	77790	1	ENSMUSG00000030650	ENSMUST00000121715	419	74424	Tmc5	transmembrane channel-like gene family 5
5	101665586	101665886	301	*	3.8109	2.94033	4.35	-1.43729	0.00454678	0.0625069	Promoter (<=1kb)	5	101658139	101664996	6858	2	ENSMUSG00000035187	ENSMUST00000044125	-590	18096	Nkx6-1	NK6 homeobox 1
16	74411581	74411881	301	*	4.88939	4.39076	5.25924	-0.907008	0.00455717	0.0625855	Promoter (<=1kb)	16	74349795	74411825	62031	2	ENSMUSG00000052516	ENSMUST00000156010	0	268902	Robo2	roundabout guidance receptor 2
3	32341226	32341526	301	*	5.0742	5.46106	4.54399	0.871028	0.0045604	0.0625855	3' UTR	3	32361072	32365460	4389	2	ENSMUSG00000027663	ENSMUST00000139660	23934	22401	Zmat3	zinc finger matrin type 3
8	117498374	117498674	301	*	6.43285	6.70574	6.09602	0.566284	0.00456054	0.0625855	Promoter (<=1kb)	8	117498291	117635142	136852	1	ENSMUSG00000034330	ENSMUST00000081232	83	234779	Plcg2	phospholipase C, gamma 2
7	80208232	80208532	301	*	3.52353	4.19373	2.23269	1.89093	0.00456714	0.0625908	Promoter (<=1kb)	7	80209394	80211678	2285	1	ENSMUSG00000108389	ENSMUST00000206885	-862
11	69714971	69715271	301	*	4.72836	5.13049	4.16887	0.914407	0.00456854	0.0625908	Distal Intergenic	11	69729995	69730584	590	2	ENSMUSG00000081333	ENSMUST00000120581	15313
17	33601719	33602019	301	*	3.27391	3.97039	1.87593	2.01585	0.00456897	0.0625908	3' UTR	17	33598141	33601847	3707	1	ENSMUSG00000024300	ENSMUST00000235099	3578	17916	Myo1f	myosin IF
9	44267894	44268194	301	*	5.1628	5.52333	4.68103	0.796771	0.00457667	0.0626085	Promoter (<=1kb)	9	44252718	44268128	15411	2	ENSMUSG00000032109	ENSMUST00000169651	0	270151	Nlrx1	NLR family member X1
4	55350237	55350537	301	*	6.23227	6.51924	5.87368	0.601937	0.00457693	0.0626085	5' UTR	4	55350090	55381116	31027	1	ENSMUSG00000028426	ENSMUST00000156263	147	19359	Rad23b	RAD23 homolog B, nucleotide excision repair protein
15	59314489	59314789	301	*	4.72918	5.13077	4.17074	0.912825	0.0045783	0.0626085	Promoter (<=1kb)	15	59315077	59328958	13882	1	ENSMUSG00000022351	ENSMUST00000162142	-288	20775	Sqle	squalene epoxidase
1	38210141	38210441	301	*	4.40529	3.81015	4.8254	-1.05109	0.00458703	0.0626912	Exon (ENSMUST00000095027/ENSMUSG00000037138, exon 12 of 22)	1	38181262	38197443	16182	2	ENSMUSG00000037138	ENSMUST00000136641	-12698	16764	Aff3	AF4/FMR2 family, member 3
4	155173229	155173529	301	*	3.2227	3.93914	1.73622	2.11986	0.00459111	0.0627102	Intron (ENSMUST00000129314/ENSMUSG00000029050, intron 1 of 6)	4	155154075	155188296	34222	2	ENSMUSG00000029050	ENSMUST00000129314	14767	20481	Ski	ski sarcoma viral oncogene homolog (avian)
7	25132403	25132703	301	*	2.69893	3.54291	0.412663	2.97574	0.00459451	0.06272	Promoter (<=1kb)	7	25087344	25132488	45145	2	ENSMUSG00000008496	ENSMUST00000108415	0	18987	Pou2f2	POU domain, class 2, transcription factor 2
4	133115914	133116214	301	*	3.39527	4.08921	2.00809	2.00559	0.00459757	0.0627252	Distal Intergenic	4	133130505	133199756	69252	1	ENSMUSG00000028868	ENSMUST00000084241	-14291	242687	Wasf2	WASP family, member 2
11	101582347	101582647	301	*	3.50013	4.1397	2.3227	1.74965	0.00460409	0.0627774	Promoter (<=1kb)	11	101582300	101588895	6596	1	ENSMUSG00000034947	ENSMUST00000128614	47	217203	Tmem106a	transmembrane protein 106A
7	143445622	143445922	301	*	3.6966	2.73274	4.26931	-1.56111	0.00461034	0.062826	Promoter (1-2kb)	7	143447605	143447665	61	1	ENSMUSG00000099103	ENSMUST00000184559	-1683
2	166141162	166141462	301	*	2.99508	3.802	0.998107	2.6881	0.00461353	0.0628328	Intron (ENSMUST00000109249/ENSMUSG00000006800, intron 1 of 20)	2	166132593	166154423	21831	2	ENSMUSG00000006800	ENSMUST00000133395	12961	72043	Sulf2	sulfatase 2
11	97664157	97664457	301	*	5.52564	5.86781	5.07622	0.746872	0.00461876	0.0628674	Promoter (<=1kb)	11	97665001	97673548	8548	1	ENSMUSG00000038437	ENSMUST00000134158	-544	246198	Mllt6	myeloid/lymphoid or mixed-lineage leukemia; translocated to, 6
3	88623382	88623682	301	*	4.29738	4.75479	3.62373	1.08089	0.0046219	0.0628735	Promoter (<=1kb)	3	88623354	88633617	10264	1	ENSMUSG00000028059	ENSMUST00000176243	28	16800	Arhgef2	rho/rac guanine nucleotide exchange factor (GEF) 2
1	84847030	84847330	301	*	2.93145	3.72958	0.994444	2.61994	0.004655	0.0632868	Intron (ENSMUST00000097672/ENSMUSG00000073633, intron 1 of 3)	1	84721189	84840516	119328	2	ENSMUSG00000026219	ENSMUST00000186465	-6514	14897	Trip12	thyroid hormone receptor interactor 12
4	118179490	118179790	301	*	5.24999	5.61859	4.75366	0.81949	0.00466195	0.0633445	Promoter (<=1kb)	4	118136959	118179654	42696	2	ENSMUSG00000033326	ENSMUST00000097911	0	230674	Kdm4a	lysine (K)-specific demethylase 4A
11	22973496	22973796	301	*	4.86848	5.26319	4.32334	0.893164	0.0046681	0.0633782	Exon (ENSMUST00000049506/ENSMUSG00000044068, exon 1 of 1)	11	22973228	22974514	1287	1	ENSMUSG00000044068	ENSMUST00000229075	268	22183	Zrsr1	zinc finger (CCCH type), RNA binding motif and serine/arginine rich 1
6	122486034	122486334	301	*	5.02852	5.41246	4.50381	0.862537	0.00466986	0.0633782	5' UTR	6	122464170	122486439	22270	2	ENSMUSG00000040649	ENSMUST00000205114	105	108653	Rimklb	ribosomal modification protein rimK-like family member B
7	34131885	34132185	301	*	3.76996	4.34262	2.80623	1.47762	0.00468261	0.0635007	Intron (ENSMUST00000038537/ENSMUSG00000036459, intron 1 of 7)	7	34110226	34132818	22593	2	ENSMUSG00000036459	ENSMUST00000140911	633	101543	Wtip	WT1 interacting protein
9	99422429	99422729	301	*	2.63149	3.51024	0	3.31753	0.00468432	0.0635007	Promoter (2-3kb)	9	99393001	99420152	27152	2	ENSMUSG00000032470	ENSMUST00000123771	-2277	17532	Mras	muscle and microspikes RAS
10	62901812	62902112	301	*	3.83947	4.3906	2.93645	1.39725	0.00469261	0.063563	Promoter (2-3kb)	10	62804577	62899118	94542	2	ENSMUSG00000047146	ENSMUST00000174189	-2694	52463	Tet1	tet methylcytosine dioxygenase 1
11	116725391	116725691	301	*	3.41461	4.08557	2.1208	1.89254	0.00469703	0.063563	Distal Intergenic	11	116739062	116749833	10772	2	ENSMUSG00000078586	ENSMUST00000106377	24142
10	75940090	75940390	301	*	3.64422	4.32289	2.31988	1.93441	0.00469708	0.063563	Intron (ENSMUST00000059658/ENSMUSG00000050157, intron 2 of 6)	10	75938176	75940611	2436	2	ENSMUSG00000050157	ENSMUST00000219979	221	333670	Gm867	predicted gene 867
7	127691566	127691866	301	*	3.96765	4.50167	3.11052	1.33623	0.00472516	0.0639059	Promoter (<=1kb)	7	127691935	127700183	8249	1	ENSMUSG00000108801	ENSMUST00000205992	-69
3	88409796	88410096	301	*	5.9203	6.22466	5.53407	0.646612	0.0047483	0.0641817	Intron (ENSMUST00000193338/ENSMUSG00000028066, intron 1 of 2)	3	88394379	88410265	15887	2	ENSMUSG00000028066	ENSMUST00000192365	169	67037	Pmf1	polyamine-modulated factor 1
16	8781117	8781417	301	*	3.77022	4.3434	2.805	1.47961	0.00477789	0.0645444	Intron (ENSMUST00000160405/ENSMUSG00000022710, intron 1 of 31)	16	8689595	8792308	102714	2	ENSMUSG00000022710	ENSMUST00000160405	10891	252870	Usp7	ubiquitin specific peptidase 7
17	24686380	24686680	301	*	3.45659	4.16908	1.98814	2.1046	0.00479611	0.064753	Exon (ENSMUST00000130936/ENSMUSG00000007021, exon 3 of 4)	17	24685092	24688199	3108	2	ENSMUSG00000007021	ENSMUST00000130936	1519	20974	Syngr3	synaptogyrin 3
4	141272986	141273286	301	*	3.95258	4.48002	3.11253	1.3127	0.00480323	0.0647614	Distal Intergenic	4	141278439	141279794	1356	1	ENSMUSG00000085395	ENSMUST00000142429	-5153	100503810	Gm13056	predicted gene 13056
2	168080985	168081285	301	*	6.35563	6.64064	6.00009	0.597019	0.00480459	0.0647614	Promoter (<=1kb)	2	168081004	168101203	20200	1	ENSMUSG00000044641	ENSMUST00000052125	0	58220	Pard6b	par-6 family cell polarity regulator beta
16	15594034	15594334	301	*	5.61521	5.93847	5.19794	0.696079	0.00480505	0.0647614	Exon (ENSMUST00000229244/ENSMUSG00000022674, exon 1 of 1)	16	15555881	15594472	38592	2	ENSMUSG00000022674	ENSMUST00000118236	138	70620	Ube2v2	ubiquitin-conjugating enzyme E2 variant 2
6	122343543	122343843	301	*	3.98574	4.50427	3.16846	1.28165	0.00482824	0.0650317	Promoter (2-3kb)	6	122318304	122340561	22258	2	ENSMUSG00000040669	ENSMUST00000112600	-2982	13619	Phc1	polyhomeotic 1
6	39401365	39401665	301	*	4.14243	4.64235	3.37107	1.2189	0.00483181	0.0650317	Exon (ENSMUST00000114823/ENSMUSG00000029922, exon 5 of 8)	6	39399143	39404730	5588	2	ENSMUSG00000029922	ENSMUST00000150575	3065	54484	Mkrn1	makorin, ring finger protein, 1
8	94695794	94696094	301	*	6.18813	6.47849	5.82423	0.610584	0.00483488	0.0650317	Exon (ENSMUST00000034227/ENSMUSG00000031775, exon 1 of 4)	8	94674894	94696278	21385	2	ENSMUSG00000031775	ENSMUST00000034227	184	67801	Pllp	plasma membrane proteolipid
10	95311163	95311463	301	*	3.39224	4.05804	2.11839	1.8676	0.00483806	0.0650317	Exon (ENSMUST00000218651/ENSMUSG00000045867, exon 3 of 3)	10	95312870	95314853	1984	2	ENSMUSG00000112744	ENSMUST00000219461	3390
7	25437598	25437898	301	*	3.2222	3.93752	1.74087	2.11366	0.00483903	0.0650317	Intron (ENSMUST00000206436/ENSMUSG00000053714, intron 5 of 5)	7	25442152	25443463	1312	2	ENSMUSG00000081732	ENSMUST00000117570	5565
11	75621202	75621502	301	*	3.27432	3.97134	1.87398	2.01872	0.00484292	0.0650466	Intron (ENSMUST00000143219/ENSMUSG00000017781, intron 10 of 11)	11	75620671	75626306	5636	1	ENSMUSG00000017781	ENSMUST00000153768	531	18738	Pitpna	phosphatidylinositol transfer protein, alpha
8	72135610	72135910	301	*	5.56677	5.90164	5.12989	0.727148	0.0048459	0.0650492	Promoter (<=1kb)	8	72135808	72153140	17333	1	ENSMUSG00000031799	ENSMUST00000238492	0	326618	Tpm4	tropomyosin 4
8	83997535	83997835	301	*	5.2476	5.60376	4.77363	0.784817	0.00485308	0.0651082	Promoter (<=1kb)	8	83997501	84000409	2909	1	ENSMUSG00000079003	ENSMUST00000095228	34	666704	Samd1	sterile alpha motif domain containing 1
2	22774452	22774752	301	*	3.34704	2.11144	4.0027	-1.90322	0.00486284	0.0652017	Promoter (<=1kb)	2	22774445	22828586	54142	1	ENSMUSG00000026786	ENSMUST00000132993	7	54519	Apbb1ip	amyloid beta (A4) precursor protein-binding, family B, member 1 interacting protein
9	16502018	16502318	301	*	3.90723	3.116	4.41531	-1.32924	0.00486686	0.0652089	Promoter (<=1kb)	9	15910189	16501285	591097	2	ENSMUSG00000074505	ENSMUST00000217308	-733	270120	Fat3	FAT atypical cadherin 3
12	108333216	108333516	301	*	3.22366	1.73027	3.9416	-2.21147	0.00487199	0.0652089	Promoter (<=1kb)	12	108334381	108362234	27854	1	ENSMUSG00000021259	ENSMUST00000021684	-865	13116	Cyp46a1	cytochrome P450, family 46, subfamily a, polypeptide 1
3	100969256	100969556	301	*	5.86781	6.18528	5.46018	0.680996	0.0048736	0.0652089	Exon (ENSMUST00000076941/ENSMUSG00000033222, exon 2 of 23)	3	100938860	100969663	30804	2	ENSMUSG00000033222	ENSMUST00000076941	107	74044	Ttf2	transcription termination factor, RNA polymerase II
18	65581123	65581423	301	*	5.54912	5.88207	5.11553	0.721931	0.00487455	0.0652089	Promoter (<=1kb)	18	65581444	65687646	106203	1	ENSMUSG00000042439	ENSMUST00000237714	-21	328977	Zfp532	zinc finger protein 532
11	103361876	103362176	301	*	3.68446	2.73983	4.25048	-1.53538	0.00487895	0.0652126	Promoter (<=1kb)	11	103331497	103360900	29404	2	ENSMUSG00000034255	ENSMUST00000107024	-976	544817	Arhgap27	Rho GTPase activating protein 27
8	123654048	123654348	301	*	6.02232	6.31012	5.66244	0.603884	0.0048804	0.0652126	Exon (ENSMUST00000136615/ENSMUSG00000039960, exon 1 of 2)	8	123653929	123663884	9956	1	ENSMUSG00000039960	ENSMUST00000045487	119	69581	Rhou	ras homolog family member U
11	44618221	44618521	301	*	4.69199	4.17074	5.07408	-0.941071	0.00488354	0.0652172	Promoter (<=1kb)	11	44618179	44643469	25291	1	ENSMUSG00000057098	ENSMUST00000135993	42	13591	Ebf1	early B cell factor 1
8	104534288	104534588	301	*	6.73785	7.00943	6.40302	0.563147	0.0048893	0.0652238	Promoter (<=1kb)	8	104522905	104534608	11704	2	ENSMUSG00000031878	ENSMUST00000159393	20	234664	Nae1	NEDD8 activating enzyme E1 subunit 1
17	32034133	32034433	301	*	4.96168	5.33353	4.45941	0.828004	0.00488962	0.0652238	Promoter (<=1kb)	17	31944769	32034508	89740	2	ENSMUSG00000002076	ENSMUST00000002145	75	74377	Hsf2bp	heat shock transcription factor 2 binding protein
18	21421418	21421718	301	*	3.86016	4.41625	2.94346	1.41579	0.0048946	0.0652307	Distal Intergenic	18	21380825	21380931	107	2	ENSMUSG00000096341	ENSMUST00000093714	-40487
16	33517423	33517723	301	*	4.96874	5.34463	4.45902	0.839466	0.00489768	0.0652307	Promoter (<=1kb)	16	33517328	33663408	146081	1	ENSMUSG00000035506	ENSMUST00000121925	95	171286	Slc12a8	solute carrier family 12 (potassium/chloride transporters), member 8
8	105225252	105225552	301	*	6.61811	6.88735	6.28683	0.557199	0.00490053	0.0652307	Promoter (<=1kb)	8	105225267	105253053	27787	1	ENSMUSG00000031889	ENSMUST00000124113	0	234678	Phaf1	phagosome assembly factor 1
10	75939279	75939579	301	*	3.19589	3.93766	1.58664	2.2623	0.00490335	0.0652307	Exon (ENSMUST00000059658/ENSMUSG00000050157, exon 5 of 7)	10	75938176	75940611	2436	2	ENSMUSG00000050157	ENSMUST00000219979	1032	333670	Gm867	predicted gene 867
13	48871128	48871428	301	*	5.42606	5.79715	4.92517	0.826826	0.00490677	0.0652307	Promoter (<=1kb)	13	48801750	48871119	69370	2	ENSMUSG00000038025	ENSMUST00000035540	-9	18676	Phf2	PHD finger protein 2
10	81332547	81332847	301	*	4.5973	4.06037	4.98771	-0.964597	0.0049069	0.0652307	Exon (ENSMUST00000105325/ENSMUSG00000034881, exon 2 of 3)	10	81328731	81335172	6442	1	ENSMUSG00000034881	ENSMUST00000220312	3816	21390	Tbxa2r	thromboxane A2 receptor
6	47820005	47820305	301	*	3.78731	4.3648	2.80947	1.49644	0.00491606	0.0653153	Promoter (4-5kb)	6	47815300	47815632	333	2	ENSMUSG00000094557	ENSMUST00000080603	-4373
5	134522722	134523022	301	*	4.28699	3.66094	4.72214	-1.09614	0.00492391	0.0653825	Promoter (1-2kb)	5	134519325	134520789	1465	2	ENSMUSG00000106691	ENSMUST00000202895	-1933
11	119297955	119298255	301	*	3.2727	3.96968	1.87259	2.01844	0.00492853	0.0654067	Intron (ENSMUST00000026667/ENSMUSG00000025580, intron 1 of 11)	11	119292841	119300014	7174	2	ENSMUSG00000025580	ENSMUST00000106253	1759	192170	Eif4a3	eukaryotic translation initiation factor 4A3
1	166137843	166138143	301	*	3.60661	4.25251	2.40663	1.77986	0.00493556	0.0654628	Intron (ENSMUST00000060833/ENSMUSG00000000544, intron 1 of 6)	1	166130467	166166509	36043	1	ENSMUSG00000000544	ENSMUST00000166860	7376	59290	Gpa33	glycoprotein A33 (transmembrane)
11	113710040	113710340	301	*	2.99622	3.8011	1.01338	2.67223	0.00495343	0.0656625	Promoter (<=1kb)	11	113698172	113710017	11846	2	ENSMUSG00000018727	ENSMUST00000018871	-23	52670	Cpsf4l	cleavage and polyadenylation specific factor 4-like
8	116921521	116921821	301	*	5.67663	5.9922	5.27213	0.675762	0.0049639	0.065764	Promoter (<=1kb)	8	116921730	116922720	991	1	ENSMUSG00000031756	ENSMUST00000212578	0	72155	Cenpn	centromere protein N
7	78902164	78902464	301	*	2.84832	3.67036	0.741123	2.79821	0.00497029	0.0658113	Promoter (<=1kb)	7	78902361	78906002	3642	1	ENSMUSG00000030609	ENSMUST00000206661	0	68048	Aen	apoptosis enhancing nuclease
14	25768526	25768826	301	*	5.79393	6.10085	5.40355	0.653182	0.00498942	0.0660271	Exon (ENSMUST00000069180/ENSMUSG00000055538, exon 1 of 4)	14	25711642	25769039	57398	2	ENSMUSG00000055538	ENSMUST00000069180	213	71918	Zcchc24	zinc finger, CCHC domain containing 24
10	80399018	80399318	301	*	6.29186	6.5714	5.94481	0.583043	0.00500231	0.0661602	5' UTR	10	80392839	80399422	6584	2	ENSMUSG00000035478	ENSMUST00000105348	104	17192	Mbd3	methyl-CpG binding domain protein 3
8	47713393	47713693	301	*	7.06932	7.32354	6.76052	0.519934	0.00501034	0.0662289	Exon (ENSMUST00000180928/ENSMUSG00000097706, exon 1 of 1)	8	47713266	47715021	1756	1	ENSMUSG00000097706	ENSMUST00000180928	127
8	66861246	66861546	301	*	5.59266	5.92036	5.16795	0.707899	0.00501427	0.0662433	Intron (ENSMUST00000118009/ENSMUSG00000014907, intron 1 of 7)	8	66860957	66883597	22641	1	ENSMUSG00000014907	ENSMUST00000212916	289	234344	Naf1	nuclear assembly factor 1 ribonucleoprotein
13	21200330	21200630	301	*	5.36929	4.98457	5.67271	-0.728449	0.0050258	0.0663582	Distal Intergenic	13	21189861	21190420	560	1	ENSMUSG00000021326	ENSMUST00000124794	10469	19720	Trim27	tripartite motif-containing 27
11	107446983	107447283	301	*	3.56077	4.21863	2.31698	1.8337	0.00503417	0.0664171	Intron (ENSMUST00000103064/ENSMUSG00000040430, intron 1 of 9)	11	107428276	107435686	7411	1	ENSMUSG00000087113	ENSMUST00000136927	18707	108167930	Gm11714	predicted gene 11714
8	84042272	84042572	301	*	4.35852	4.82673	3.66093	1.11569	0.00503595	0.0664171	Promoter (<=1kb)	8	84030352	84042569	12218	2	ENSMUSG00000005465	ENSMUST00000210245	0	50931	Il27ra	interleukin 27 receptor, alpha
7	5012781	5013081	301	*	5.77305	6.08724	5.37082	0.672224	0.00504172	0.0664482	5' UTR	7	5007275	5013238	5964	2	ENSMUSG00000061374	ENSMUST00000208944	157	23877	Fiz1	Flt3 interacting zinc finger protein 1
7	12910163	12910463	301	*	4.5745	5.00097	3.96638	0.986394	0.005044	0.0664482	Distal Intergenic	7	12922290	12926685	4396	1	ENSMUSG00000012848	ENSMUST00000108539	-11827	20103	Rps5	ribosomal protein S5
4	53440619	53440919	301	*	6.12927	6.41538	5.77201	0.599669	0.00505273	0.0665257	Promoter (<=1kb)	4	53440671	53528709	88039	1	ENSMUSG00000028412	ENSMUST00000136607	0	100434	Slc44a1	solute carrier family 44, member 1
8	13548935	13549235	301	*	2.54769	3.4187	0.00017804	3.2254	0.00505594	0.0665305	Promoter (1-2kb)	8	13537678	13547028	9351	2	ENSMUSG00000110278	ENSMUST00000210253	-1907
2	71539327	71539627	301	*	3.43728	4.08639	2.22574	1.79125	0.00506325	0.0665892	Promoter (1-2kb)	2	71532784	71537891	5108	2	ENSMUSG00000084946	ENSMUST00000137251	-1436	111970	Dlx1as	distal-less homeobox 1, antisense
8	12439619	12439919	301	*	4.23625	4.7014	3.54551	1.10517	0.00506635	0.0665925	Distal Intergenic	8	12461419	12466964	5546	2	ENSMUSG00000109921	ENSMUST00000209741	27045
11	3452089	3452389	301	*	5.98937	6.28523	5.61675	0.624604	0.00507268	0.0666381	Promoter (<=1kb)	11	3415982	3452363	36382	2	ENSMUSG00000020448	ENSMUST00000064364	0	193670	Rnf185	ring finger protein 185
7	127198881	127199181	301	*	3.98407	4.52391	3.11154	1.35734	0.00507721	0.0666601	3' UTR	7	127199057	127199985	929	2	ENSMUSG00000042492	ENSMUST00000153857	804	68449	Tbc1d10b	TBC1 domain family, member 10b
8	69209042	69209342	301	*	6.15002	6.44374	5.78079	0.619235	0.0050867	0.0667472	Promoter (<=1kb)	8	69209046	69228094	19049	1	ENSMUSG00000059897	ENSMUST00000212312	0	234358	Zfp930	zinc finger protein 930
16	22637064	22637364	301	*	3.14852	3.88047	1.58835	2.20392	0.00509934	0.0668755	Intron (ENSMUST00000089925/ENSMUSG00000022861, intron 1 of 24)	16	22595628	22657028	61401	2	ENSMUSG00000022861	ENSMUST00000150553	19664	110197	Dgkg	diacylglycerol kinase, gamma
[truncated: 21,576 more rows]

## Sheet: H3K27me3_DBA_KOvsWT
seqnames	start	end	width	strand	Conc	Conc_KO	Conc_WT	Fold	p.value	FDR	annotation	geneChr	geneStart	geneEnd	geneLength	geneStrand	geneId	transcriptId	distanceToTSS	ENTREZID	SYMBOL	GENENAME
[truncated: 29,085 more rows]

[truncated: 6 more sheets: H3K4me1_DBA_KOvsWT, H3K27ac_DBA_KOvsWT, Diff_Enh_Poised.Gained.KO, Diff_Enh_Poised.Lost.KO, Diff_Enh_Active.Gained.KO.wK4, Diff_Enh_Active.Lost.KO.wK4]
