# Supplementary material for: Chromatin activity of IκBα mediates the exit from naïve pluripotency
Source: eLife. 2025 Oct 22;14:RP102784. doi: 10.7554/eLife.102784 (PMC12543326; doi:10.7554/eLife.102784)
Supplement: Supplementary file 3. [file elife-102784-supp3.xlsx]

## Sheet: mESCs_DEA_KOvsWT
	baseMean	log2FoldChange	lfcSE	stat	pvalue	padj	Shrunken_lFC	Shrunken_lFCSE	chrom	source	start	end	gene_id	gene_name	Entrez	gene_biotype
ENSMUSG00000051951	9.12062	-1.89655	0.759514	-2.49706	0.0125228	0.0844871	-0.146455	0.275639	1	ensembl_havana	3205901	3671498	ENSMUSG00000051951	Xkr4	497097	protein_coding
ENSMUSG00000025902	46.0593	3.23253	0.743875	4.34554	1.38936e-05	0.000429377	2.85031	0.800259	1	ensembl_havana	4490931	4497354	ENSMUSG00000025902	Sox17	20671	protein_coding
ENSMUSG00000103922	320.514	0.044985	0.158187	0.284378	0.776121	0.912306	0.0275648	0.123301	1	havana	4771131	4772199	ENSMUSG00000103922	Gm6123	620009	processed_pseudogene
ENSMUSG00000033845	6952.16	-0.0356304	0.0747716	-0.476523	0.633702	0.840777	-0.0309979	0.0699369	1	ensembl_havana	4773206	4785739	ENSMUSG00000033845	Mrpl15	27395	protein_coding
ENSMUSG00000102275	55.6277	-0.236914	0.297316	-0.796843	0.425542	0.703131	-0.0740308	0.174848	1	havana	4778063	4779212	ENSMUSG00000102275	Gm37144		TEC
ENSMUSG00000025903	5042.38	-0.0788145	0.128429	-0.61368	0.539426	0.786372	-0.0554523	0.108994	1	ensembl_havana	4807788	4848410	ENSMUSG00000025903	Lypla1	18777	protein_coding
ENSMUSG00000033813	8410.58	-0.0811418	0.0957113	-0.847776	0.396563	0.681761	-0.0674815	0.0872432	1	ensembl_havana	4857814	4897909	ENSMUSG00000033813	Tcea1	21399	protein_coding
ENSMUSG00000062588	5.03191	-0.0947471	0.894322	-0.105943	0.915628		-0.00415788	0.189635	1	havana	4880049	4880651	ENSMUSG00000062588	Gm6104		processed_pseudogene
ENSMUSG00000002459	16.9372	0.759169	0.639801	1.18657	0.235397	0.522757	0.0671917	0.201501	1	ensembl_havana	4909576	5070285	ENSMUSG00000002459	Rgs20	58175	protein_coding
ENSMUSG00000033793	2527.51	0.17137	0.0866626	1.97743	0.0479927	0.205037	0.148528	0.0832199	1	ensembl_havana	5070018	5162529	ENSMUSG00000033793	Atp6v1h	108664	protein_coding
ENSMUSG00000025905	10.468	-0.660578	0.687162	-0.961314	0.336394	0.62604	-0.0501241	0.195528	1	ensembl_havana	5588466	5606131	ENSMUSG00000025905	Oprk1	18387	protein_coding
ENSMUSG00000025907	2023.8	-0.0679249	0.0968683	-0.701209	0.483173	0.748432	-0.0546937	0.0876473	1	ensembl_havana	6206197	6276648	ENSMUSG00000025907	Rb1cc1	12421	protein_coding
ENSMUSG00000090031	11.8715	0.466065	0.573288	0.812968	0.416236	0.697162	0.049525	0.191849	1	ensembl_havana	6209866	6215293	ENSMUSG00000090031	4732440D04Rik		antisense
ENSMUSG00000033740	1.66022	-0.28068	1.66571	-0.168505	0.866186		-0.00372562	0.192718	1	ensembl_havana	6487231	6860940	ENSMUSG00000033740	St18	240690	protein_coding
ENSMUSG00000102135	15.0467	0.63598	0.546014	1.16477	0.244113	0.533188	0.0764485	0.202177	1	havana	6916559	6923588	ENSMUSG00000102135	Gm37108		processed_pseudogene
ENSMUSG00000051285	3343.34	-0.409205	0.145235	-2.81754	0.00483935	0.0415565	-0.333966	0.14857	1	ensembl_havana	7088920	7173628	ENSMUSG00000051285	Pcmtd1	319263	protein_coding
ENSMUSG00000103509	256.338	-0.30626	0.18662	-1.64109	0.100779	0.327668	-0.187552	0.168447	1	havana	7148110	7152137	ENSMUSG00000103509	Gm38372		TEC
ENSMUSG00000048538	39.4952	0.168457	0.318082	0.529602	0.596388	0.820373	0.0468359	0.170832	1	ensembl_havana	7177739	7179037	ENSMUSG00000048538	Gm9826		processed_pseudogene
ENSMUSG00000097797	27.1331	0.371671	0.416137	0.893144	0.37178	0.659533	0.0700334	0.190096	1	havana	7349406	7397869	ENSMUSG00000097797	Gm26901		lincRNA
ENSMUSG00000103067	6.29895	-0.491311	0.799175	-0.614772	0.538705		-0.027532	0.191211	1	havana	7497968	7518149	ENSMUSG00000103067	Gm30414		lincRNA
ENSMUSG00000025909	2.72682	-0.291078	1.25947	-0.231111	0.817229		-0.00665115	0.191887	1	ensembl_havana	8361475	9299878	ENSMUSG00000025909	Sntg1	71096	protein_coding
ENSMUSG00000086235	3.30431	-0.0173614	1.0357	-0.0167631	0.986626		-0.00051879	0.190652	1	havana	8468426	8468825	ENSMUSG00000086235	Gm16284		processed_pseudogene
ENSMUSG00000084353	25.8114	0.0417399	0.399015	0.104607	0.916688	0.970388	0.00816802	0.174607	1	havana	8791923	8792162	ENSMUSG00000084353	Gm15452		processed_pseudogene
ENSMUSG00000103933	28.4879	0.316415	0.40155	0.787985	0.430706	0.70767	0.0626319	0.18578	1	havana	8815842	8816039	ENSMUSG00000103933	Gm36964		processed_pseudogene
ENSMUSG00000061024	2399.34	-0.180307	0.117716	-1.53171	0.125594	0.368759	-0.139269	0.10871	1	ensembl_havana	9545408	9547455	ENSMUSG00000061024	Rrs1	59014	protein_coding
ENSMUSG00000025911	58.9045	0.629672	0.326541	1.92831	0.0538163	0.220834	0.244232	0.300641	1	ensembl_havana	9547948	9580673	ENSMUSG00000025911	Adhfe1	76187	protein_coding
ENSMUSG00000081441	8.1592	-0.125359	0.685819	-0.182787	0.854965	0.945297	-0.00916415	0.186949	1	havana	9574548	9575649	ENSMUSG00000081441	Gm6161	620542	processed_pseudogene
ENSMUSG00000025912	929.002	0.0134577	0.129672	0.103783	0.917342	0.970616	0.00946538	0.107861	1	ensembl_havana	9667415	9700209	ENSMUSG00000025912	Mybl1	17864	protein_coding
ENSMUSG00000045210	2367.21	-0.119017	0.10377	-1.14693	0.251412	0.5419	-0.0944955	0.0946677	1	ensembl_havana	9718622	9748382	ENSMUSG00000045210	Vcpip1	70675	protein_coding
ENSMUSG00000097893	16.4221	-0.434763	0.499114	-0.871069	0.383716	0.670333	-0.0591436	0.191954	1	havana	9747648	9791924	ENSMUSG00000097893	1700034P13Rik		antisense
ENSMUSG00000025915	617.966	0.367462	0.168655	2.17878	0.0293484	0.14999	0.26412	0.167453	1	ensembl_havana	9798107	9900845	ENSMUSG00000025915	Sgk3	170755	protein_coding
ENSMUSG00000046334	2.20711	2.29952	1.54738	1.48607	0.137261		0.0389642	0.198139	1	havana	9802197	9802553	ENSMUSG00000046334	Gm6195	108167613	processed_pseudogene
ENSMUSG00000046101	30.9369	0.341369	0.35661	0.957262	0.338435	0.627307	0.0836853	0.188777	1	ensembl_havana	9908638	9942085	ENSMUSG00000046101	Mcmdc2	240697	protein_coding
ENSMUSG00000098234	1261.77	-0.116353	0.111976	-1.03909	0.298763	0.589058	-0.0892999	0.100416	1	havana	9941959	9944118	ENSMUSG00000098234	Snhg6	73824	lincRNA
ENSMUSG00000093178	48.942	-0.0510683	0.289818	-0.176208	0.86013	0.947674	-0.0156756	0.16174	1	ensembl	9942463	9942549	ENSMUSG00000093178	Snord87	266793	snoRNA
ENSMUSG00000099032	131.262	0.721142	0.227273	3.17302	0.00150865	0.0170434	0.575445	0.247816	1	ensembl_havana	9960163	9967932	ENSMUSG00000099032	Tcf24	100039596	protein_coding
ENSMUSG00000025917	3552.87	-0.0523841	0.0870166	-0.602001	0.547173	0.791131	-0.0439421	0.0798805	1	ensembl_havana	10024601	10038168	ENSMUSG00000025917	Cops5	26754	protein_coding
ENSMUSG00000056763	1494	-0.115064	0.128473	-0.895626	0.370452	0.658464	-0.0818386	0.111117	1	ensembl_havana	10037987	10136768	ENSMUSG00000056763	Cspp1	211660	protein_coding
ENSMUSG00000067851	2500	0.251664	0.125031	2.01281	0.0441344	0.194004	0.198058	0.119987	1	ensembl_havana	10137571	10232670	ENSMUSG00000067851	Arfgef1	211673	protein_coding
ENSMUSG00000048960	804.901	-0.433398	0.240521	-1.80192	0.0715585	0.264941	-0.224864	0.221813	1	ensembl_havana	10993465	11303681	ENSMUSG00000048960	Prex2	109294	protein_coding
ENSMUSG00000057715	88.3959	0.592223	0.322298	1.8375	0.066136	0.251751	0.222045	0.278515	1	ensembl_havana	11414105	11975901	ENSMUSG00000057715	A830018L16Rik	320492	protein_coding
ENSMUSG00000101610	3.53512	-0.452552	1.03676	-0.436508	0.662468		-0.015247	0.191531	1	havana	12120960	12121832	ENSMUSG00000101610	Gm7560		processed_pseudogene
ENSMUSG00000016918	2625.17	-0.253636	0.140126	-1.81006	0.0702873	0.261473	-0.186652	0.131791	1	ensembl_havana	12692277	12861192	ENSMUSG00000016918	Sulf1	240725	protein_coding
ENSMUSG00000025938	155.658	0.393223	0.200098	1.96515	0.049397	0.208855	0.248708	0.194605	1	ensembl_havana	12866549	12992650	ENSMUSG00000025938	Slco5a1	240726	protein_coding
ENSMUSG00000069620	10.9253	0.564342	0.793326	0.711362	0.47686	0.742623	0.0324095	0.192208	1	havana	13062025	13062345	ENSMUSG00000069620	Gm5250		processed_pseudogene
ENSMUSG00000099498	7.16671	-0.214141	0.775636	-0.276085	0.782483		-0.012559	0.188716	1	havana	13068838	13078662	ENSMUSG00000099498	Gm29283		lincRNA
ENSMUSG00000042414	515.457	0.0488433	0.143962	0.33928	0.734399	0.896185	0.0317303	0.116415	1	ensembl_havana	13113457	13127163	ENSMUSG00000042414	Prdm14	383491	protein_coding
ENSMUSG00000005886	1540.96	-0.0950259	0.0901439	-1.05416	0.291811	0.582164	-0.0791274	0.0833856	1	ensembl_havana	13139105	13374083	ENSMUSG00000005886	Ncoa2	17978	protein_coding
ENSMUSG00000025935	2973.71	0.224258	0.0842224	2.66269	0.00775184	0.0593847	0.199719	0.0826744	1	ensembl_havana	13564698	13589910	ENSMUSG00000025935	Tram1	72265	protein_coding
ENSMUSG00000025937	3324.14	0.0887186	0.111316	0.796996	0.425453	0.703131	0.0678252	0.0985949	1	ensembl_havana	13623330	13660546	ENSMUSG00000025937	Lactb2	212442	protein_coding
ENSMUSG00000102982	16.3741	-0.0194135	0.56448	-0.0343917	0.972565	0.990265	-0.00195158	0.183435	1	havana	13641483	13642748	ENSMUSG00000102982	Gm38319		TEC
ENSMUSG00000067813	20.7572	1.08403	0.722155	1.50111	0.133327	0.381319	0.0770893	0.209322	1	ensembl_havana	13668771	13701723	ENSMUSG00000067813	Xkr9	381246	protein_coding
ENSMUSG00000097711	2.43778	-2.21554	1.41988	-1.56037	0.118672		-0.0428811	0.19921	1	havana	13785883	13786879	ENSMUSG00000097711	Gm5523	433273	processed_pseudogene
ENSMUSG00000025932	105.427	0.636004	0.329624	1.92948	0.0536707	0.220469	0.243215	0.303153	1	ensembl_havana	14168954	14310235	ENSMUSG00000025932	Eya1	14048	protein_coding
ENSMUSG00000054493	2.71884	-0.659129	1.23325	-0.534467	0.593018		-0.0158529	0.192573	1	ensembl_havana	14752937	14776931	ENSMUSG00000054493	Gm9947		antisense
ENSMUSG00000025930	220.459	-0.0025864	0.799057	-0.00323682	0.997417	0.998638	0.000210814	0.188482	1	ensembl_havana	14753346	14755992	ENSMUSG00000025930	Msc	17681	protein_coding
ENSMUSG00000082193	33.8766	-0.429656	0.362135	-1.18645	0.235443	0.522757	-0.10608	0.201236	1	ensembl_havana	14865072	14865965	ENSMUSG00000082193	Rpl5-ps1	665407	processed_pseudogene
ENSMUSG00000032769	78.033	-0.273836	0.289434	-0.946111	0.344092	0.633033	-0.0904881	0.17908	1	ensembl_havana	14872648	14918862	ENSMUSG00000032769	Trpa1	277328	protein_coding
ENSMUSG00000073737	12.8026	0.582429	0.664229	0.87685	0.380568	0.667616	0.0471825	0.19394	1	havana	15268802	15269797	ENSMUSG00000073737	Gm10566	100039959	processed_pseudogene
ENSMUSG00000025925	5694.51	-0.319701	0.146832	-2.17733	0.0294562	0.150163	-0.240766	0.143884	1	ensembl_havana	15805646	15844052	ENSMUSG00000025925	Terf1	21749	protein_coding
ENSMUSG00000104379	22.6566	-0.503692	0.457679	-1.10054	0.271099	0.561015	-0.0820215	0.199478	1	havana	15853331	15856499	ENSMUSG00000104379	Gm37509		TEC
ENSMUSG00000067795	1.79787	0.538824	1.55121	0.347357	0.728323		0.00835272	0.192729	1	ensembl_havana	16065979	16093325	ENSMUSG00000067795	4930444P10Rik	75799	protein_coding
ENSMUSG00000043716	63907.8	-0.106479	0.0940476	-1.13219	0.257556	0.547971	-0.0873467	0.0867888	1	ensembl_havana	16101295	16104662	ENSMUSG00000043716	Rpl7	19989	protein_coding
ENSMUSG00000025921	207.634	-0.0449177	0.16494	-0.272328	0.78537	0.916843	-0.0260699	0.126346	1	ensembl_havana	16105774	16133734	ENSMUSG00000025921	Rdh10	98711	protein_coding
ENSMUSG00000025920	275.41	-0.0224591	0.14489	-0.155008	0.876815	0.954047	-0.0142406	0.116229	1	ensembl_havana	16228674	16520112	ENSMUSG00000025920	Stau2	29819	protein_coding
ENSMUSG00000025939	843.799	-0.0488137	0.0978578	-0.498823	0.617904	0.831827	-0.0389859	0.0878919	1	ensembl_havana	16540790	16619489	ENSMUSG00000025939	Ube2w	66799	protein_coding
ENSMUSG00000079658	4222.45	-0.047396	0.0856779	-0.553188	0.580135	0.811345	-0.0400772	0.0787615	1	ensembl_havana	16641725	16657042	ENSMUSG00000079658	Eloc	67923	protein_coding
ENSMUSG00000097744	2.09135	0.878192	1.4565	0.602945	0.546545		0.0154643	0.193171	1	havana	16657552	16662278	ENSMUSG00000097744	D030040B21Rik	329101	lincRNA
ENSMUSG00000025940	748.331	0.138987	0.114625	1.21254	0.225307	0.51109	0.106671	0.103612	1	ensembl_havana	16665207	16678275	ENSMUSG00000025940	Tmem70	70397	protein_coding
ENSMUSG00000025779	6.54169	0.112596	0.763675	0.14744	0.882785		0.00694288	0.188156	1	ensembl_havana	16688051	16709611	ENSMUSG00000025779	Ly96	17087	protein_coding
ENSMUSG00000091020	23.5927	0.0481269	0.452587	0.106337	0.915315	0.969796	0.00763865	0.178443	1	havana	16768279	16770138	ENSMUSG00000091020	Gm5828	545306	processed_pseudogene
ENSMUSG00000042686	144.969	-0.77151	0.313286	-2.46264	0.0137919	0.0902802	-0.453376	0.383185	1	ensembl_havana	16964560	17097889	ENSMUSG00000042686	Jph1	57339	protein_coding
ENSMUSG00000025777	4.67547	0.152266	1.04099	0.146271	0.883707		0.00518955	0.190788	1	ensembl_havana	17145362	17164271	ENSMUSG00000025777	Gdap1	14545	protein_coding
ENSMUSG00000100398	14.8641	0.234582	0.614649	0.381652	0.702719	0.880667	0.0215462	0.186524	1	havana	17394958	17395429	ENSMUSG00000100398	Gm5251		processed_pseudogene
ENSMUSG00000101589	4.37221	-1.37359	0.984447	-1.39529	0.162928		-0.0530654	0.200866	1	havana	17397412	17400281	ENSMUSG00000101589	Rbm6-ps1	108212	processed_pseudogene
ENSMUSG00000025776	22.5208	-1.13536	0.450323	-2.52121	0.0116953	0.0806544	-0.539353	0.763033	1	ensembl_havana	17727045	17766344	ENSMUSG00000025776	Crispld1	83691	protein_coding
ENSMUSG00000100720	9.42923	-0.965348	0.71935	-1.34197	0.179605	0.450929	-0.0690477	0.2045	1	havana	19153422	19153966	ENSMUSG00000100720	Gm10075		processed_pseudogene
ENSMUSG00000100204	5.72994	-0.309418	0.934859	-0.330979	0.740661		-0.0126617	0.190526	1	havana	19330939	19333184	ENSMUSG00000100204	Gm4849	226901	processed_pseudogene
ENSMUSG00000043760	73.9168	0.516541	0.412823	1.25124	0.210846	0.493534	0.104052	0.207694	1	ensembl_havana	20057779	20618064	ENSMUSG00000043760	Pkhd1	241035	protein_coding
ENSMUSG00000041872	9.25176	0.255717	0.880499	0.290423	0.771493	0.910228	0.0120224	0.189932	1	ensembl_havana	20777146	20790617	ENSMUSG00000041872	Il17f	257630	protein_coding
ENSMUSG00000041859	16676.2	-0.0116622	0.0951212	-0.122604	0.902421	0.965562	-0.00912582	0.0854309	1	ensembl_havana	20802968	20820312	ENSMUSG00000041859	Mcm3	17215	protein_coding
ENSMUSG00000097934	2.46519	-0.11539	1.20139	-0.0960467	0.923484		-0.00288228	0.191514	1	havana	20888650	20890473	ENSMUSG00000097934	6720483E21Rik	77741	lincRNA
ENSMUSG00000025931	150.607	0.0718042	0.247077	0.290614	0.771346	0.910228	0.0277698	0.154037	1	ensembl_havana	20890606	20939650	ENSMUSG00000025931	Paqr8	74229	protein_coding
ENSMUSG00000041809	43.6275	-0.514929	0.344818	-1.49334	0.135349	0.384541	-0.149565	0.226607	1	ensembl_havana	20951626	20990841	ENSMUSG00000041809	Efhc1	71877	protein_coding
ENSMUSG00000041779	451.223	0.230401	0.16803	1.37119	0.170316	0.437843	0.145051	0.145739	1	ensembl_havana	20996299	21079229	ENSMUSG00000041779	Tram2	170829	protein_coding
ENSMUSG00000100819	5.36667	-0.0914566	0.911578	-0.100328	0.920084		-0.00387662	0.189762	1	havana	21178988	21187427	ENSMUSG00000100819	Gm2693		unprocessed_pseudogene
ENSMUSG00000025933	111.829	0.146459	0.22943	0.638358	0.523241	0.778004	0.0632301	0.154903	1	ensembl_havana	21218575	21230167	ENSMUSG00000025933	Tmem14a	75712	protein_coding
ENSMUSG00000025934	391.361	0.557633	0.275654	2.02294	0.043079	0.190746	0.281046	0.280074	1	ensembl_havana	21240589	21265661	ENSMUSG00000025934	Gsta3	14859	protein_coding
ENSMUSG00000099343	32.18	0.239956	0.366342	0.655005	0.512465	0.770405	0.0525568	0.178773	1	havana	21250359	21271593	ENSMUSG00000099343	Gm28836		antisense
ENSMUSG00000028033	13.4935	0.519546	0.61357	0.846759	0.397129	0.682115	0.0486094	0.193004	1	ensembl_havana	21398403	21961942	ENSMUSG00000028033	Kcnq5	226922	protein_coding
ENSMUSG00000082935	78.0096	-0.0166255	0.23749	-0.0700051	0.94419	0.980695	-0.00650325	0.150283	1	havana	21511933	21513056	ENSMUSG00000082935	Gm7658	665489	processed_pseudogene
ENSMUSG00000041670	153.204	-0.174881	0.425991	-0.410527	0.681419	0.867385	-0.0300946	0.179214	1	ensembl_havana	22286251	22805994	ENSMUSG00000041670	Rims1	116837	protein_coding
ENSMUSG00000097970	6.31705	0.695937	0.971799	0.716132	0.47391		0.0269263	0.192923	1	havana	23291537	23291935	ENSMUSG00000097970	Gm27028		lincRNA
ENSMUSG00000026158	515.996	-0.135708	0.142802	-0.950323	0.341948	0.631184	-0.0910667	0.12108	1	ensembl_havana	23366424	23397772	ENSMUSG00000026158	Ogfrl1	70155	protein_coding
ENSMUSG00000026155	2520.24	0.329997	0.0952225	3.46553	0.000529179	0.00772548	0.297504	0.095662	1	ensembl_havana	23844846	23922317	ENSMUSG00000026155	Smap1	98366	protein_coding
ENSMUSG00000026154	399.533	0.016432	0.204872	0.0802059	0.936074	0.977725	0.00794038	0.140961	1	ensembl_havana	23995939	24005656	ENSMUSG00000026154	Sdhaf4	68002	protein_coding
ENSMUSG00000026153	1276.84	-0.116007	0.107149	-1.08267	0.278956	0.56849	-0.0908243	0.0969859	1	ensembl_havana	24011093	24100341	ENSMUSG00000026153	Fam135a	68187	protein_coding
ENSMUSG00000026147	4.47809	-0.989143	1.01047	-0.978893	0.327633		-0.0354677	0.195216	1	ensembl_havana	24177610	24252684	ENSMUSG00000026147	Col9a1	12839	protein_coding
ENSMUSG00000099997	7.86542	-0.370664	0.706577	-0.524591	0.599867		-0.0260463	0.189435	1	havana	24594087	24595423	ENSMUSG00000099997	Tubb4b-ps2	665829	processed_pseudogene
ENSMUSG00000100131	356.652	0.0510591	0.159662	0.319796	0.749123	0.902045	0.0307318	0.1242	1	havana	24611535	24612410	ENSMUSG00000100131	Gm28439		unprocessed_pseudogene
ENSMUSG00000067736	128.329	0.102751	0.193001	0.532384	0.59446	0.819511	0.0527082	0.140502	1	ensembl_havana	24612407	24612700	ENSMUSG00000067736	Gm10222	100142658	unprocessed_pseudogene
ENSMUSG00000101939	279.483	-0.0187061	0.201418	-0.0928724	0.926005	0.973607	-0.00886595	0.139819	1	havana	24612775	24613119	ENSMUSG00000101939	Gm28438		unprocessed_pseudogene
ENSMUSG00000101111	1466.77	-0.0561228	0.11613	-0.483275	0.6289	0.838702	-0.0412101	0.100518	1	havana	24613189	24613971	ENSMUSG00000101111	Gm28437		unprocessed_pseudogene
ENSMUSG00000100862	1838.56	-0.319859	0.119305	-2.68103	0.00733961	0.0568093	-0.267858	0.119037	1	havana	24613974	24614651	ENSMUSG00000100862	Gm10925	100503946	unprocessed_pseudogene
ENSMUSG00000102070	1306.99	-0.142972	0.132317	-1.08053	0.279908	0.569392	-0.101704	0.11561	1	havana	24614885	24615565	ENSMUSG00000102070	Gm28661		unprocessed_pseudogene
ENSMUSG00000101249	940.696	0.0146071	0.110636	0.132029	0.894961	0.963481	0.0112464	0.09616	1	havana	24615706	24616197	ENSMUSG00000101249	Gm29216		unprocessed_pseudogene
ENSMUSG00000073725	415.974	-0.0619132	0.136942	-0.452113	0.651188	0.850449	-0.0414977	0.113138	1	ensembl_havana	24678630	24766301	ENSMUSG00000073725	Lmbrd1	68421	protein_coding
ENSMUSG00000033569	13.5652	0.13873	0.528726	0.262386	0.793024	0.919233	0.0166773	0.182968	1	ensembl_havana	25067476	25829707	ENSMUSG00000033569	Adgrb3	210933	protein_coding
ENSMUSG00000086240	211.826	-0.104947	0.205696	-0.510204	0.609909	0.827337	-0.0501112	0.144773	1	havana	28580499	28580772	ENSMUSG00000086240	Gm7846		processed_pseudogene
ENSMUSG00000099492	22.1104	0.374864	0.439343	0.853237	0.393528	0.678524	0.0641377	0.189735	1	havana	29484604	29485915	ENSMUSG00000099492	Gm5525	433283	processed_pseudogene
ENSMUSG00000048874	8059.81	-0.138871	0.107591	-1.29073	0.196798	0.475208	-0.109221	0.0985093	1	ensembl_havana	30802339	30873921	ENSMUSG00000048874	Phf3	213109	protein_coding
ENSMUSG00000103783	1.94334	-2.47369	1.68174	-1.47091	0.141314		-0.0339352	0.197131	1	havana	30833548	30836431	ENSMUSG00000103783	Gm37522		TEC
ENSMUSG00000104315	15.9772	0.555548	0.615497	0.902601	0.366738	0.654853	0.0518108	0.194217	1	havana	30865504	30868538	ENSMUSG00000104315	Gm37906		TEC
ENSMUSG00000026064	59.7827	-0.102437	0.262978	-0.389528	0.696886	0.876734	-0.0363157	0.158737	1	havana	30940302	30949309	ENSMUSG00000026064	Ptp4a1	19243	protein_coding
ENSMUSG00000117091	21.1558	0.0641553	0.482424	0.132985	0.894205	0.963089	0.0090993	0.180196	1	ensembl_havana	30977243	30977968	ENSMUSG00000117091	Gm5698	435615	protein_coding
ENSMUSG00000086726	1.76087	-0.121804	1.60877	-0.0757126	0.939648		-0.00172134	0.192574	1	havana	30986225	30986953	ENSMUSG00000086726	Gm9458	669402	processed_pseudogene
ENSMUSG00000086727	13.853	-0.400628	0.738283	-0.542649	0.587372	0.815185	-0.0259765	0.189998	1	ensembl_havana	30997842	31222684	ENSMUSG00000086727	4931428L18Rik		protein_coding
ENSMUSG00000094215	11.9545	0.124874	0.624637	0.199915	0.841547	0.939652	0.0111736	0.185635	1	havana	31286945	31287640	ENSMUSG00000094215	Gm6489		processed_pseudogene
ENSMUSG00000070960	3.55549	0.794533	1.15906	0.685497	0.49303		0.0218628	0.193101	1	havana	31615149	31616661	ENSMUSG00000070960	Gm19680	100503415	processed_pseudogene
ENSMUSG00000026058	7.54438	-0.677572	0.754267	-0.898319	0.369016		-0.0426272	0.19439	1	ensembl_havana	32172714	32658568	ENSMUSG00000026058	Khdrbs2	170771	protein_coding
ENSMUSG00000026134	1727.96	-0.0376957	0.134509	-0.280246	0.779288	0.914153	-0.0254759	0.111002	1	ensembl_havana	33453810	33669795	ENSMUSG00000026134	Prim2	19076	protein_coding
ENSMUSG00000103746	2.58984	0.40942	1.25016	0.327494	0.743295		0.00971588	0.192017	1	ensembl_havana	33669824	33670712	ENSMUSG00000103746	1700001G17Rik	67503	TEC
ENSMUSG00000004768	1929.86	-0.224895	0.174496	-1.28883	0.197456	0.476196	-0.136836	0.14807	1	ensembl_havana	33719887	33742564	ENSMUSG00000004768	Rab23	19335	protein_coding
ENSMUSG00000042215	168.554	-0.0233892	0.226682	-0.10318	0.91782	0.970756	-0.00974549	0.147549	1	ensembl_havana	33745484	33757795	ENSMUSG00000042215	Bag2	213539	protein_coding
ENSMUSG00000042197	2995.67	-0.203765	0.0858843	-2.37255	0.0176656	0.107299	-0.179099	0.0836096	1	ensembl_havana	33761545	33814595	ENSMUSG00000042197	Zfp451	98403	protein_coding
ENSMUSG00000081402	22.9096	-0.0862097	0.450855	-0.191214	0.848358	0.942426	-0.0133531	0.178692	1	havana	33836124	33838680	ENSMUSG00000081402	Gm15455	433287	processed_pseudogene
ENSMUSG00000042182	47.5809	0.224611	0.346001	0.649163	0.516233	0.772753	0.0555201	0.17711	1	ensembl_havana	33852052	33907816	ENSMUSG00000042182	Bend6	320705	protein_coding
ENSMUSG00000026131	7324.37	-0.230444	0.137412	-1.67703	0.0935358	0.312978	-0.16915	0.127433	1	ensembl_havana	33908225	34308661	ENSMUSG00000026131	Dst	13518	protein_coding
ENSMUSG00000103596	2.54194	-1.34551	1.32024	-1.01914	0.308135		-0.0288206	0.195081	1	havana	33922455	33924838	ENSMUSG00000103596	Gm37354		TEC
ENSMUSG00000103364	5.50705	0.536229	0.986376	0.543636	0.586692		0.0201368	0.191828	1	havana	34032100	34033797	ENSMUSG00000103364	Gm38157		TEC
ENSMUSG00000096992	23.5257	-0.622578	0.553333	-1.12514	0.26053	0.550637	-0.0716282	0.200356	1	havana	34165856	34178446	ENSMUSG00000096992	Gm26788	108167617	processed_transcript
ENSMUSG00000102336	8.56353	-0.10786	0.712803	-0.151318	0.879725	0.955722	-0.00730202	0.187367	1	havana	34427002	34433264	ENSMUSG00000102336	Gm37233		lincRNA
ENSMUSG00000042111	824.455	-0.192572	0.106118	-1.8147	0.0695697	0.25976	-0.156827	0.100529	1	ensembl_havana	34436670	34439672	ENSMUSG00000042111	Ccdc115	69668	protein_coding
ENSMUSG00000026127	3206.09	-0.0203076	0.0924116	-0.219752	0.826064	0.933894	-0.0165732	0.0835055	1	ensembl_havana	34439851	34449356	ENSMUSG00000026127	Imp4	27993	protein_coding
ENSMUSG00000026126	31.4169	-0.420266	0.416338	-1.00944	0.312766	0.603849	-0.0798924	0.194566	1	ensembl_havana	34459762	34475733	ENSMUSG00000026126	Ptpn18	19253	protein_coding
ENSMUSG00000100280	2.63181	-0.71503	1.29623	-0.551621	0.581208		-0.0157141	0.192769	1	havana	34468834	34473148	ENSMUSG00000100280	Gm28417		processed_transcript
ENSMUSG00000026125	1.93504	-0.375504	1.61669	-0.232268	0.81633		-0.00532086	0.192689	1	ensembl_havana	34498410	34503063	ENSMUSG00000026125	Prss39	21755	protein_coding
ENSMUSG00000026124	14.4474	-1.05183	0.656562	-1.60203	0.109149	0.342495	-0.0921201	0.216802	1	ensembl_havana	34535648	34544313	ENSMUSG00000026124	Cfc1	12627	protein_coding
ENSMUSG00000045174	2.78269	-0.157923	1.16521	-0.135532	0.892192		-0.00420732	0.191394	1	ensembl_havana	34579657	34590944	ENSMUSG00000045174	Amer3	211383	protein_coding
ENSMUSG00000037509	206.244	-0.0939265	0.173035	-0.542818	0.587255	0.815089	-0.053062	0.132249	1	ensembl_havana	34678188	34813309	ENSMUSG00000037509	Arhgef4	226970	protein_coding
ENSMUSG00000104002	14.09	-0.0742715	0.586035	-0.126736	0.89915	0.964606	-0.00717687	0.184339	1	havana	34809360	34811908	ENSMUSG00000104002	Gm38336		antisense
ENSMUSG00000037503	3475.28	-0.17286	0.0917902	-1.8832	0.0596727	0.236011	-0.146962	0.0876666	1	ensembl_havana	34813219	34843065	ENSMUSG00000037503	Fam168b	214469	protein_coding
ENSMUSG00000026123	661.831	0.31452	0.237474	1.32444	0.185356	0.459156	0.144291	0.184197	1	ensembl_havana	34849976	34879580	ENSMUSG00000026123	Plekhb2	226971	protein_coding
ENSMUSG00000103708	10.7147	0.939878	0.660937	1.42204	0.155015	0.415219	0.0810601	0.209403	1	havana	36002985	36011044	ENSMUSG00000103708	Gm33222		lincRNA
ENSMUSG00000045216	2313.99	0.00496738	0.0886987	0.0560029	0.95534	0.98409	0.00412612	0.0806704	1	ensembl_havana	36068400	36106446	ENSMUSG00000045216	Hs6st1	50785	protein_coding
ENSMUSG00000037470	4684.02	0.262902	0.106307	2.47305	0.0133966	0.0884477	0.222714	0.104389	1	ensembl_havana	36140027	36244720	ENSMUSG00000037470	Uggt1	320011	protein_coding
ENSMUSG00000047180	8.39086	-0.264851	0.689784	-0.383963	0.701006	0.879033	-0.0194132	0.188026	1	ensembl_havana	36264597	36274679	ENSMUSG00000047180	Neurl3	214854	protein_coding
ENSMUSG00000037447	128.85	0.280444	0.213577	1.31308	0.189156	0.464282	0.144099	0.172128	1	ensembl_havana	36307733	36324029	ENSMUSG00000037447	Arid5a	214855	protein_coding
ENSMUSG00000010453	1929.04	0.104359	0.10557	0.988525	0.322896	0.612735	0.0823406	0.095317	1	ensembl_havana	36335730	36369181	ENSMUSG00000010453	Kansl3	226976	protein_coding
ENSMUSG00000001143	462.905	0.261674	0.130064	2.01189	0.0442314	0.194281	0.20288	0.124836	1	ensembl_havana	36419871	36445271	ENSMUSG00000001143	Lman2l	214895	protein_coding
ENSMUSG00000037408	268.652	0.00254243	0.140995	0.0180321	0.985613	0.994358	0.00178877	0.114041	1	ensembl_havana	36471620	36508764	ENSMUSG00000037408	Cnnm4	94220	protein_coding
ENSMUSG00000104316	1.92774	0.693171	1.42894	0.485095	0.627609		0.0126877	0.192796	1	havana	36473952	36476110	ENSMUSG00000104316	Gm37909		TEC
ENSMUSG00000001138	911.372	-0.0851152	0.1269	-0.670724	0.502396	0.762873	-0.0607671	0.108442	1	ensembl_havana	36511867	36528237	ENSMUSG00000001138	Cnnm3	94218	protein_coding
ENSMUSG00000067653	13.5135	-0.186287	0.549982	-0.338715	0.734825	0.896305	-0.0205407	0.18432	1	ensembl_havana	36530188	36536883	ENSMUSG00000067653	Ankrd23	78321	protein_coding
ENSMUSG00000079610	125.205	0.191106	0.238569	0.80105	0.423102	0.702207	0.0801042	0.161772	1	ensembl_havana	36537507	36547445	ENSMUSG00000079610	Ankrd39	109346	protein_coding
ENSMUSG00000026121	198.214	0.482827	0.181276	2.66349	0.00773346	0.0593232	0.368378	0.189882	1	ensembl_havana	36548639	36558349	ENSMUSG00000026121	Sema4c	20353	protein_coding
ENSMUSG00000046337	294.4	0.71804	0.223077	3.2188	0.00128727	0.0150881	0.578038	0.242619	1	ensembl_havana	36562692	36683183	ENSMUSG00000046337	Fam178b	381337	protein_coding
ENSMUSG00000061518	3870.2	0.0694928	0.0766017	0.907196	0.364303	0.652268	0.0606754	0.0719074	1	ensembl_havana	36691449	36693681	ENSMUSG00000061518	Cox5b	12859	protein_coding
ENSMUSG00000037351	3360.51	0.00919207	0.106611	0.086221	0.931291	0.974922	0.00591159	0.0934472	1	ensembl_havana	36698114	36714422	ENSMUSG00000037351	Actr1b	226977	protein_coding
ENSMUSG00000102416	1.5487	1.67234	1.70991	0.978029	0.32806		0.0221122	0.194552	1	havana	36710149	36757953	ENSMUSG00000102416	4933424G06Rik	71166	protein_coding
ENSMUSG00000026117	74.1559	0.582059	0.265163	2.1951	0.0281565	0.146211	0.331241	0.28588	1	ensembl_havana	36761798	36782818	ENSMUSG00000026117	Zap70	22637	protein_coding
ENSMUSG00000026116	7137.61	-0.225541	0.137268	-1.64308	0.100367	0.326941	-0.168891	0.127284	1	ensembl_havana	36792191	36943666	ENSMUSG00000026116	Tmem131	56030	protein_coding
ENSMUSG00000103016	5.03152	-1.2159	0.886748	-1.37119	0.170316		-0.0578451	0.20187	1	havana	36871903	36872045	ENSMUSG00000103016	Gm37506		TEC
ENSMUSG00000050122	508.601	0.157659	0.21918	0.719311	0.471949	0.740136	0.071864	0.153418	1	ensembl_havana	37026596	37187613	ENSMUSG00000050122	Vwa3b	70853	protein_coding
ENSMUSG00000026114	247.967	0.478177	0.300474	1.59141	0.111517	0.346886	0.175408	0.230008	1	ensembl_havana	37214434	37263384	ENSMUSG00000026114	Cnga3	12790	protein_coding
ENSMUSG00000026113	278.435	0.374275	0.155142	2.41248	0.0158446	0.0994948	0.286866	0.156181	1	ensembl_havana	37299865	37410736	ENSMUSG00000026113	Inpp4a	269180	protein_coding
ENSMUSG00000026112	3955.59	-0.0390509	0.083518	-0.467575	0.640089	0.845156	-0.0328981	0.0769598	1	ensembl_havana	37417084	37430103	ENSMUSG00000026112	Coa5	76178	protein_coding
ENSMUSG00000026111	828.296	-0.072123	0.119639	-0.602837	0.546617	0.791116	-0.053032	0.103352	1	ensembl_havana	37430139	37439124	ENSMUSG00000026111	Unc50	67387	protein_coding
ENSMUSG00000026110	635.553	-0.0753094	0.121897	-0.61781	0.536701	0.785379	-0.0544867	0.104868	1	ensembl_havana	37439340	37541016	ENSMUSG00000026110	Mgat4a	269181	protein_coding
ENSMUSG00000026090	34.8597	-0.0459899	0.341157	-0.134806	0.892765	0.962142	-0.0110537	0.168919	1	ensembl_havana	37611677	37720085	ENSMUSG00000026090	2010300C02Rik	72097	protein_coding
ENSMUSG00000060771	186.689	-0.203784	0.200692	-1.01541	0.309912	0.601108	-0.10599	0.154446	1	ensembl_havana	37754776	37866429	ENSMUSG00000060771	Tsga10	211484	protein_coding
ENSMUSG00000037216	222.003	-0.128717	0.156842	-0.820684	0.411827	0.69423	-0.080203	0.127737	1	ensembl_havana	37871738	37876228	ENSMUSG00000037216	Lipt1	623661	protein_coding
ENSMUSG00000026088	868.79	-0.183478	0.0984012	-1.86459	0.0622389	0.242561	-0.153307	0.0937077	1	ensembl_havana	37874801	37890411	ENSMUSG00000026088	Mitd1	69028	protein_coding
ENSMUSG00000026087	1828.65	-0.0979968	0.115329	-0.849717	0.395482	0.680714	-0.0764536	0.101885	1	ensembl_havana	37890477	37898535	ENSMUSG00000026087	Mrpl30	107734	protein_coding
ENSMUSG00000058407	3282.89	-0.024249	0.0908223	-0.266994	0.789474	0.918011	-0.0200249	0.0823598	1	ensembl_havana	37985189	37997893	ENSMUSG00000058407	Txndc9	98258	protein_coding
ENSMUSG00000026083	10356.3	0.00880403	0.0993897	0.0885809	0.929415	0.974502	0.00689028	0.0884691	1	ensembl_havana	37998010	38055579	ENSMUSG00000026083	Eif5b	226982	protein_coding
ENSMUSG00000026082	3699.99	-0.294204	0.156141	-1.88422	0.0595358	0.235661	-0.208345	0.148234	1	ensembl_havana	38052786	38129801	ENSMUSG00000026082	Rev1	56210	protein_coding
ENSMUSG00000103804	16.346	0.2795	0.506401	0.551934	0.580993	0.811775	0.0364551	0.185323	1	havana	38076295	38077305	ENSMUSG00000103804	Gm37062		sense_intronic
ENSMUSG00000037138	200.573	-0.147043	0.254101	-0.578681	0.562805	0.800026	-0.0554771	0.160086	1	ensembl_havana	38177326	38664955	ENSMUSG00000037138	Aff3	16764	protein_coding
ENSMUSG00000048814	73.5952	-0.149999	0.47093	-0.318516	0.750094	0.902209	-0.0216202	0.180808	1	ensembl_havana	38793645	38836711	ENSMUSG00000048814	Lonrf2	381338	protein_coding
ENSMUSG00000026080	462.006	-0.422503	0.15404	-2.74281	0.00609159	0.0493269	-0.337549	0.15823	1	ensembl_havana	38863867	38898161	ENSMUSG00000026080	Chst10	98388	protein_coding
ENSMUSG00000026078	2075.43	-0.018859	0.092194	-0.204558	0.837918	0.937976	-0.0153211	0.0833408	1	ensembl_havana	38985608	38997238	ENSMUSG00000026078	Pdcl3	68833	protein_coding
ENSMUSG00000103046	16.8263	-0.152095	0.507751	-0.299547	0.764523	0.907425	-0.0193123	0.182375	1	havana	38992678	38994316	ENSMUSG00000103046	Gm37309		TEC
ENSMUSG00000026077	15.7137	0.666064	0.500344	1.33121	0.183119	0.456019	0.097067	0.21134	1	ensembl_havana	39193731	39363236	ENSMUSG00000026077	Npas2	18143	protein_coding
ENSMUSG00000073702	23825.8	-0.0508606	0.0930939	-0.546336	0.584835	0.813519	-0.0433881	0.0844998	1	ensembl_havana	39367842	39371911	ENSMUSG00000073702	Rpl31	114641	protein_coding
ENSMUSG00000003134	507.4	0.65394	0.201673	3.24257	0.00118456	0.0142937	0.534498	0.216563	1	ensembl_havana	39371492	39478755	ENSMUSG00000003134	Tbc1d8	54610	protein_coding
ENSMUSG00000003135	2642.31	-0.0191428	0.10759	-0.177923	0.858783	0.947385	-0.0145776	0.0941802	1	ensembl_havana	39534992	39546889	ENSMUSG00000003135	Cnot11	52846	protein_coding
ENSMUSG00000085894	73.1158	-0.140365	0.257514	-0.545079	0.585699	0.814216	-0.051746	0.160151	1	havana	39547570	39552002	ENSMUSG00000085894	Gm15832		processed_transcript
ENSMUSG00000077704	16.9194	0.229837	0.565359	0.406532	0.684352	0.869251	0.024489	0.185459	1	ensembl	39548745	39548854	ENSMUSG00000077704	Snord89	100217461	snoRNA
ENSMUSG00000048234	1449.46	0.0179991	0.116004	0.15516	0.876695	0.954037	0.0129153	0.0996428	1	ensembl_havana	39551296	39577405	ENSMUSG00000048234	Rnf149	67702	protein_coding
ENSMUSG00000064936	4.01639	0.203305	1.02818	0.197732	0.843255		0.00704717	0.190794	1	ensembl	39573746	39573875	ENSMUSG00000064936	Gm23722	115485772	snoRNA
ENSMUSG00000050967	29.4343	1.1586	0.543279	2.13261	0.0329565	0.160878	0.173565	0.296865	1	ensembl_havana	39618406	39651474	ENSMUSG00000050967	Creg2	263764	protein_coding
ENSMUSG00000097083	32.4445	0.71843	0.457696	1.56966	0.116493	0.356037	0.129059	0.231977	1	havana	39650176	39657390	ENSMUSG00000097083	D930019O06Rik		antisense
ENSMUSG00000101634	23.1673	0.135582	0.442331	0.306517	0.759211	0.905059	0.0221681	0.179074	1	havana	39839175	39847334	ENSMUSG00000101634	1700066B17Rik	73426	lincRNA
ENSMUSG00000026074	9234.46	-0.147858	0.0907802	-1.62875	0.103367	0.332302	-0.125133	0.0858302	1	ensembl_havana	39900913	40026310	ENSMUSG00000026074	Map4k4	26921	protein_coding
ENSMUSG00000026073	26.0425	-0.0971282	0.503953	-0.192733	0.847168	0.942426	-0.0124148	0.181483	1	ensembl_havana	40074079	40125231	ENSMUSG00000026073	Il1r2	16178	protein_coding
ENSMUSG00000026072	16.6235	-0.101563	0.581646	-0.174613	0.861383	0.948177	-0.0100494	0.184317	1	ensembl_havana	40225080	40317257	ENSMUSG00000026072	Il1r1	16177	protein_coding
ENSMUSG00000070942	17.8862	0.215603	0.517199	0.416867	0.676776	0.864971	0.0270327	0.183906	1	ensembl_havana	40324610	40367562	ENSMUSG00000070942	Il1rl2	107527	protein_coding
ENSMUSG00000026062	7.14185	-0.0991315	0.739841	-0.13399	0.89341		-0.00626624	0.187771	1	ensembl_havana	40680574	40769273	ENSMUSG00000026062	Slc9a2	226999	protein_coding
ENSMUSG00000041945	92.9092	-0.359608	0.27092	-1.32736	0.18439	0.457791	-0.141395	0.196918	1	ensembl_havana	40772038	40790687	ENSMUSG00000041945	Mfsd9	211798	protein_coding
ENSMUSG00000045515	11.0609	1.21726	0.679555	1.79127	0.0732505	0.269459	0.104191	0.2264	1	ensembl_havana	42694925	42703176	ENSMUSG00000045515	Pou3f3	18993	protein_coding
ENSMUSG00000060679	2452.85	0.100542	0.0783522	1.28321	0.199419	0.478443	0.0877005	0.074015	1	ensembl_havana	42851233	42905683	ENSMUSG00000060679	Mrps9	69527	protein_coding
ENSMUSG00000041907	5.60597	-1.65728	0.906189	-1.82885	0.0674225		-0.0783847	0.212962	1	ensembl_havana	42952872	43035456	ENSMUSG00000041907	Gpr45	93690	protein_coding
ENSMUSG00000070939	401.809	0.0825766	0.133444	0.618809	0.536042	0.784834	0.0569956	0.112138	1	ensembl_havana	43047200	43098637	ENSMUSG00000070939	Tgfbrap1	73122	protein_coding
ENSMUSG00000010290	1570.69	-0.130137	0.0927414	-1.40322	0.16055	0.423485	-0.108558	0.0867024	1	ensembl_havana	43098710	43115947	ENSMUSG00000010290	AI597479	98404	protein_coding
ENSMUSG00000008136	25.1195	-0.38416	0.395078	-0.972364	0.33087	0.620584	-0.0793209	0.191989	1	ensembl_havana	43123074	43196984	ENSMUSG00000008136	Fhl2	14200	protein_coding
ENSMUSG00000094497	2057.87	0.0253276	0.112556	0.225022	0.821962	0.93229	0.0199859	0.097546	1	ensembl_havana	43189156	43189638	ENSMUSG00000094497	Gm8210		processed_pseudogene
ENSMUSG00000099576	2.78951	-0.175094	1.15346	-0.151799	0.879346		-0.00476538	0.191362	1	havana	43250156	43302925	ENSMUSG00000099576	Gm29040		lincRNA
ENSMUSG00000066877	301.126	-0.0813002	0.177871	-0.457074	0.647618	0.84906	-0.0445111	0.13341	1	ensembl_havana	43444579	43570515	ENSMUSG00000066877	Nck2	17974	protein_coding
ENSMUSG00000103945	36.6207	-0.18856	0.367511	-0.513072	0.607901	0.826571	-0.0416957	0.176186	1	havana	43560273	43561565	ENSMUSG00000103945	Gm38228		TEC
ENSMUSG00000026051	3.77483	-0.212167	1.01082	-0.209895	0.833749		-0.00747824	0.190693	1	ensembl_havana	43730602	43742578	ENSMUSG00000026051	Ecrg4	78896	protein_coding
ENSMUSG00000100480	4.96583	0.550149	0.927285	0.59329	0.552987		0.0234149	0.191837	1	havana	43745784	43746282	ENSMUSG00000100480	Gm29156		lincRNA
ENSMUSG00000057363	1100.56	0.311962	0.0932912	3.34396	0.000825909	0.01083	0.280339	0.0934079	1	ensembl_havana	43746966	43827800	ENSMUSG00000057363	Uxs1	67883	protein_coding
ENSMUSG00000100701	2.50315	-0.126944	1.33824	-0.0948589	0.924427		-0.00255442	0.191988	1	havana	43888051	43888595	ENSMUSG00000100701	Gm19587		processed_pseudogene
ENSMUSG00000041763	6622.68	0.0203337	0.0726711	0.279804	0.779628	0.914177	0.019108	0.0681148	1	ensembl_havana	43933647	44003000	ENSMUSG00000041763	Tpp2	22019	protein_coding
ENSMUSG00000091844	10.8127	0.224958	0.633192	0.355276	0.722383	0.890274	0.0195338	0.186744	1	ensembl_havana	44055872	44079746	ENSMUSG00000091844	Gm8251	102636082	protein_coding
ENSMUSG00000026049	897.203	-0.0740766	0.110523	-0.670235	0.502708	0.762912	-0.0569734	0.0974907	1	ensembl_havana	44086613	44102441	ENSMUSG00000026049	Tex30	75623	protein_coding
ENSMUSG00000026047	669.087	0.293646	0.139648	2.10275	0.0354875	0.168169	0.22412	0.135549	1	ensembl_havana	44106546	44118808	ENSMUSG00000026047	Poglut2	72050	protein_coding
ENSMUSG00000041684	814.886	-0.0464357	0.109471	-0.424181	0.671434	0.86234	-0.0352538	0.0959	1	ensembl_havana	44118957	44144770	ENSMUSG00000041684	Bivm	246229	protein_coding
ENSMUSG00000026048	1224.92	-0.119306	0.116342	-1.02548	0.305139	0.595757	-0.0899524	0.103571	1	ensembl_havana	44147744	44181260	ENSMUSG00000026048	Ercc5	22592	protein_coding
ENSMUSG00000056870	119.415	-0.308959	0.211268	-1.4624	0.143632	0.396597	-0.164948	0.178102	1	ensembl_havana	44551511	44796838	ENSMUSG00000056870	Gulp1	70676	protein_coding
ENSMUSG00000026043	5.94005	-3.62085	1.17115	-3.0917	0.00199014		-0.133339	0.266944	1	ensembl_havana	45311538	45349706	ENSMUSG00000026043	Col3a1	12825	protein_coding
ENSMUSG00000026042	34.3564	0.37942	0.410961	0.923252	0.355876	0.64422	0.073383	0.191004	1	ensembl_havana	45374321	45503282	ENSMUSG00000026042	Col5a2	12832	protein_coding
ENSMUSG00000025995	7974.75	-0.171903	0.087975	-1.95399	0.0507021	0.211923	-0.148101	0.0843664	1	ensembl_havana	45795166	45823619	ENSMUSG00000025995	Wdr75	73674	protein_coding
ENSMUSG00000084817	42.5627	-0.0854328	0.310724	-0.274947	0.783357	0.916108	-0.0238109	0.165878	1	havana	45857332	45857754	ENSMUSG00000084817	Gm5526		processed_pseudogene
ENSMUSG00000025993	285.62	-1.30427	0.311945	-4.1811	2.90108e-05	0.000781337	-1.14183	0.334144	1	ensembl_havana	45908068	45926523	ENSMUSG00000025993	Slc40a1	53945	protein_coding
ENSMUSG00000041144	7.86094	0.0692188	0.778467	0.0889168	0.929148		0.00442699	0.188253	1	ensembl_havana	46066315	46373550	ENSMUSG00000041144	Dnah7b	227058	protein_coding
ENSMUSG00000101262	17.5131	-0.450767	0.470578	-0.957901	0.338113	0.627294	-0.0688083	0.194075	1	havana	46414502	46416932	ENSMUSG00000101262	Gm8326		processed_pseudogene
ENSMUSG00000101337	14.4358	0.0310832	0.817453	0.0380245	0.969668	0.989184	0.00180543	0.188714	1	ensembl_havana	46425592	46807476	ENSMUSG00000101337	Dnah7c	100101919	protein_coding
ENSMUSG00000025986	5494.13	-0.42402	0.106831	-3.96908	7.21496e-05	0.00162483	-0.384636	0.108668	1	ensembl_havana	46807544	46892852	ENSMUSG00000025986	Slc39a10	227059	protein_coding
ENSMUSG00000100213	14.1109	-0.75674	0.618991	-1.22254	0.221504	0.506534	-0.0712805	0.202817	1	havana	46849529	46850479	ENSMUSG00000100213	Gm28151		lincRNA
ENSMUSG00000101447	1.84541	0.616746	1.59879	0.385758	0.699676		0.00906231	0.192858	1	havana	47153461	47189071	ENSMUSG00000101447	Gm28826		lincRNA
ENSMUSG00000081185	5.26411	0.465414	0.866985	0.53682	0.591392		0.0225408	0.191089	1	ensembl_havana	47365644	47366372	ENSMUSG00000081185	Gm4852		processed_pseudogene
ENSMUSG00000100033	68.2111	-0.118424	0.249593	-0.474469	0.635166	0.841809	-0.0451506	0.157044	1	havana	47657693	47659630	ENSMUSG00000100033	Gm8337	666869	processed_pseudogene
ENSMUSG00000100816	12.9061	1.75503	0.675102	2.59966	0.00933173	0.0682618	0.195916	0.357002	1	havana	50815375	50817701	ENSMUSG00000100816	Gm28321	102633780	lincRNA
ENSMUSG00000026109	20.2824	-0.359073	0.446027	-0.805049	0.420791	0.700286	-0.059188	0.188463	1	ensembl_havana	50900647	51187270	ENSMUSG00000026109	Tmeff2	56363	protein_coding
ENSMUSG00000045954	1.76682	-2.33445	1.62431	-1.4372	0.150661		-0.0352443	0.197289	1	ensembl_havana	51289126	51302960	ENSMUSG00000045954	Cavin2	20324	protein_coding
ENSMUSG00000026107	3091.88	-0.342544	0.0936263	-3.65863	0.000253566	0.00433104	-0.310675	0.0942236	1	ensembl_havana	51465862	51478425	ENSMUSG00000026107	Nabp1	109019	protein_coding
ENSMUSG00000099413	11.4875	-0.163191	0.611052	-0.267066	0.789418	0.918011	-0.0148671	0.185609	1	havana	51507086	51596718	ENSMUSG00000099413	Gm17767	100045066	lincRNA
ENSMUSG00000018417	3037.9	0.534202	0.0891234	5.99395	2.048e-09	2.17228e-07	0.508528	0.0903065	1	ensembl_havana	51749765	51916071	ENSMUSG00000018417	Myo1b	17912	protein_coding
ENSMUSG00000072324	189.832	0.0661974	0.204583	0.323573	0.746262	0.900774	0.0317254	0.142223	1	havana	51940664	51941261	ENSMUSG00000072324	Gm8420	667014	processed_pseudogene
ENSMUSG00000062939	194.153	-0.385564	0.198033	-1.94697	0.0515385	0.21443	-0.243093	0.191606	1	ensembl_havana	51987148	52107189	ENSMUSG00000062939	Stat4	20849	protein_coding
ENSMUSG00000078291	4.13576	0.857407	0.958565	0.894469	0.371071		0.0347192	0.194479	1	ensembl_havana	52090635	52091066	ENSMUSG00000078291	Gm3940	100042634	processed_pseudogene
ENSMUSG00000109599	3.50633	-0.450179	0.994383	-0.452722	0.650749		-0.0164881	0.191383	1	havana	52108121	52113751	ENSMUSG00000109599	Gm31812		lincRNA
ENSMUSG00000026104	197.721	0.00949248	0.162465	0.0584278	0.953408	0.983515	0.00571954	0.124568	1	ensembl_havana	52119440	52161865	ENSMUSG00000026104	Stat1	20846	protein_coding
ENSMUSG00000026103	3061.83	-0.207937	0.108925	-1.90899	0.0562631	0.227505	-0.169384	0.103747	1	ensembl_havana	52163448	52233232	ENSMUSG00000026103	Gls	14660	protein_coding
ENSMUSG00000002881	758.319	0.476621	0.12065	3.95044	7.80071e-05	0.00172288	0.429408	0.123577	1	ensembl_havana	52457294	52500679	ENSMUSG00000002881	Nab1	17936	protein_coding
ENSMUSG00000097833	17.4443	1.22443	0.860618	1.42273	0.154814	0.414876	0.0602875	0.203105	1	havana	52503234	52504229	ENSMUSG00000097833	Gm5976	546736	processed_pseudogene
ENSMUSG00000100007	52.0338	-0.466999	0.322729	-1.44703	0.147888	0.403615	-0.148528	0.21921	1	havana	52584518	52585159	ENSMUSG00000100007	Gm5527		processed_pseudogene
ENSMUSG00000043015	412.419	0.0450087	0.136553	0.329607	0.741697	0.899406	0.0303362	0.112314	1	ensembl_havana	52630703	52651919	ENSMUSG00000043015	Nemp2	227094	protein_coding
ENSMUSG00000041439	74.0707	0.484709	0.367279	1.31973	0.186926	0.461256	0.121406	0.211725	1	ensembl_havana	52656286	52727462	ENSMUSG00000041439	Mfsd6	98682	protein_coding
ENSMUSG00000026102	134.871	0.36009	0.198671	1.81249	0.0699102	0.260465	0.220128	0.186198	1	ensembl_havana	52785427	52817688	ENSMUSG00000026102	Inpp1	16329	protein_coding
ENSMUSG00000041426	701.901	0.204944	0.145661	1.407	0.159428	0.422152	0.142378	0.129992	1	ensembl_havana	52844929	52920986	ENSMUSG00000041426	Hibch	227095	protein_coding
ENSMUSG00000043629	1846.4	-0.227963	0.169416	-1.34558	0.178439	0.449181	-0.142164	0.14603	1	ensembl_havana	52922324	53020179	ENSMUSG00000043629	1700019D03Rik	67080	protein_coding
ENSMUSG00000060715	167.48	0.603843	0.393793	1.5334	0.125177	0.367929	0.141947	0.232924	1	ensembl_havana	53158577	53187636	ENSMUSG00000060715	1700019A02Rik	69397	protein_coding
ENSMUSG00000026098	1199.76	-0.1259	0.10162	-1.23892	0.215375	0.499364	-0.101291	0.0934162	1	ensembl_havana	53189187	53297018	ENSMUSG00000026098	Pms1	227099	protein_coding
ENSMUSG00000026097	688.909	-0.0916464	0.160114	-0.572383	0.567063	0.802242	-0.0552075	0.12644	1	ensembl_havana	53297095	53310309	ENSMUSG00000026097	Ormdl1	227102	protein_coding
ENSMUSG00000026096	374.236	-0.0778767	0.145784	-0.534192	0.593208	0.818854	-0.050211	0.118608	1	ensembl_havana	53313624	53326343	ENSMUSG00000026096	Osgepl1	72085	protein_coding
ENSMUSG00000101838	2.00694	-0.288683	1.34796	-0.214162	0.83042		-0.00580733	0.192121	1	havana	53326206	53342186	ENSMUSG00000101838	Gm18800		transcribed_unprocessed_pseudogene
ENSMUSG00000026095	381.182	0.137503	0.156413	0.879099	0.379348	0.66711	0.0865589	0.128369	1	ensembl_havana	53344617	53352752	ENSMUSG00000026095	Asnsd1	70396	protein_coding
ENSMUSG00000096141	41.0562	0.858074	0.35596	2.41059	0.0159266	0.0996601	0.449063	0.465398	1	ensembl_havana	53397006	53706784	ENSMUSG00000096141	Dnah7a	627872	protein_coding
ENSMUSG00000026094	1101.31	-0.0483845	0.119264	-0.405692	0.684969	0.869456	-0.0346271	0.102251	1	ensembl_havana	53755506	53785224	ENSMUSG00000026094	Stk17b	98267	protein_coding
ENSMUSG00000042807	280.797	0.384644	0.261503	1.4709	0.141319	0.393181	0.164753	0.205268	1	ensembl_havana	53806876	54195168	ENSMUSG00000042807	Hecw2	329152	protein_coding
ENSMUSG00000025983	24.1252	-0.204124	0.408387	-0.499829	0.617195	0.831395	-0.037966	0.179362	1	ensembl_havana	54250683	54368727	ENSMUSG00000025983	Ccdc150	78016	protein_coding
ENSMUSG00000041303	3093.92	-0.194093	0.0831784	-2.33345	0.0196243	0.115957	-0.171048	0.080855	1	ensembl_havana	54396004	54438971	ENSMUSG00000041303	Gtf3c3	98488	protein_coding
ENSMUSG00000073678	1663.26	-0.0635959	0.16854	-0.377333	0.705926	0.882076	-0.0354179	0.128576	1	ensembl_havana	54472994	54557684	ENSMUSG00000073678	Pgap1	241062	protein_coding
ENSMUSG00000104136	1.64025	0.29207	1.51713	0.192515	0.847339		0.00473424	0.192479	1	havana	54518610	54520270	ENSMUSG00000104136	Gm36955		TEC
ENSMUSG00000052331	148.908	1.4908	0.418488	3.56235	0.000367551	0.00582085	1.22017	0.470142	1	ensembl_havana	54645340	54926387	ENSMUSG00000052331	Ankrd44	329154	protein_coding
ENSMUSG00000025982	24750.7	-0.131391	0.0912871	-1.43932	0.150061	0.40696	-0.109977	0.0855759	1	ensembl_havana	54985169	55027481	ENSMUSG00000025982	Sf3b1	81898	protein_coding
ENSMUSG00000103030	1.8058	-0.612384	1.51771	-0.403491	0.686587		-0.00986027	0.192772	1	havana	55051319	55053112	ENSMUSG00000103030	E330011M16Rik		TEC
ENSMUSG00000025981	791.261	-0.0410708	0.124407	-0.330132	0.741301	0.899374	-0.0290738	0.105211	1	ensembl_havana	55052770	55072702	ENSMUSG00000025981	Coq10b	67876	protein_coding
ENSMUSG00000101122	10.1234	-0.268596	0.651392	-0.412342	0.680088	0.866654	-0.0218744	0.187547	1	havana	55066264	55067069	ENSMUSG00000101122	Gm17971	100416214	processed_pseudogene
ENSMUSG00000025980	62489.7	-0.0598023	0.0911403	-0.656157	0.511723	0.76969	-0.0557424	0.0832733	1	ensembl_havana	55077835	55088243	ENSMUSG00000025980	Hspd1	15510	protein_coding
ENSMUSG00000073676	11853.7	-0.0431657	0.0870623	-0.495802	0.620034	0.833048	-0.0360196	0.0797644	1	ensembl_havana	55088132	55091307	ENSMUSG00000073676	Hspe1	15528	protein_coding
ENSMUSG00000100736	2.71394	-0.654514	1.14972	-0.569283	0.569164		-0.0181025	0.192498	1	havana	55120080	55120873	ENSMUSG00000100736	Gm5147	381258	processed_pseudogene
ENSMUSG00000089670	1.61628	-0.364798	1.6628	-0.219387	0.826349		-0.0049007	0.192747	1	havana	55127297	55128287	ENSMUSG00000089670	Gm16581	100417585	processed_pseudogene
ENSMUSG00000025979	2637.18	-0.257979	0.0850919	-3.03177	0.00243123	0.0246756	-0.231878	0.0843138	1	ensembl_havana	55131231	55154899	ENSMUSG00000025979	Mob4	19070	protein_coding
ENSMUSG00000025978	10.3633	0.629439	0.813943	0.773321	0.439333	0.714061	0.0344173	0.192996	1	ensembl_havana	55170159	55226782	ENSMUSG00000025978	Rftn2	74013	protein_coding
ENSMUSG00000046994	996.455	0.0347938	0.129118	0.269473	0.787566	0.917723	0.0243814	0.107866	1	ensembl_havana	55237177	55248470	ENSMUSG00000046994	Mars2	212679	protein_coding
ENSMUSG00000025977	70.0719	0.137585	0.266959	0.515379	0.606288	0.825942	0.0486963	0.161724	1	ensembl_havana	55248658	55363469	ENSMUSG00000025977	Boll	75388	protein_coding
ENSMUSG00000100215	10.8728	0.347417	0.638404	0.544196	0.586307	0.814628	0.02987	0.188611	1	havana	55335401	55335796	ENSMUSG00000100215	Gm8292	666793	processed_pseudogene
ENSMUSG00000101085	1.92446	0.118887	1.72435	0.0689461	0.945033		0.00152977	0.192753	1	havana	55381195	55382087	ENSMUSG00000101085	Gm8531	667237	processed_pseudogene
ENSMUSG00000038349	3.61285	0.857758	1.03376	0.829743	0.406684		0.0299372	0.1939	1	ensembl_havana	55405921	55754285	ENSMUSG00000038349	Plcl1	227120	protein_coding
ENSMUSG00000100309	42.5261	-0.0753737	0.309969	-0.243165	0.807877	0.925821	-0.0209915	0.165483	1	havana	55444074	55445024	ENSMUSG00000100309	Gm6644		processed_pseudogene
ENSMUSG00000099950	2.51237	3.55938	1.67601	2.12372	0.033694		0.0506505	0.202589	1	havana	55931241	55972328	ENSMUSG00000099950	9130227L01Rik	329159	lincRNA
ENSMUSG00000038331	296.813	1.42674	0.352817	4.04384	5.25832e-05	0.00124971	1.23403	0.381401	1	ensembl_havana	56793981	56978650	ENSMUSG00000038331	Satb2	212712	protein_coding
ENSMUSG00000087022	2.62278	2.61858	1.52536	1.71669	0.0860353		0.0466092	0.200637	1	havana	56971412	57050084	ENSMUSG00000087022	9130024F11Rik		processed_transcript
ENSMUSG00000097519	144.924	-0.0770564	0.17876	-0.43106	0.666425	0.858345	-0.0419653	0.133549	1	havana	57359222	57377544	ENSMUSG00000097519	4930558J18Rik	75323	lincRNA
ENSMUSG00000038323	383.949	0.172632	0.140345	1.23005	0.218678	0.50295	0.12005	0.123197	1	ensembl_havana	57377620	57385423	ENSMUSG00000038323	1700066M21Rik	73467	protein_coding
ENSMUSG00000048495	656.042	-0.0321818	0.136492	-0.235779	0.813604	0.928791	-0.0213842	0.11197	1	ensembl_havana	57388237	57407101	ENSMUSG00000048495	Tyw5	68736	protein_coding
ENSMUSG00000025971	766.792	-0.0211912	0.107522	-0.197087	0.843759	0.940839	-0.0162049	0.094162	1	ensembl_havana	57406328	57417953	ENSMUSG00000025971	Maip1	68115	protein_coding
ENSMUSG00000038305	53.8516	0.145567	0.40434	0.360011	0.718839	0.888162	0.0276347	0.17707	1	ensembl_havana	57774162	57948394	ENSMUSG00000038305	Spats2l	67198	protein_coding
ENSMUSG00000054770	431.978	0.11481	0.128247	0.895219	0.37067	0.658577	0.0823922	0.111009	1	ensembl_havana	57955101	58018956	ENSMUSG00000054770	Kctd18	51960	protein_coding
ENSMUSG00000026039	4552.67	0.089116	0.106855	0.833986	0.404289	0.688561	0.0693775	0.0955397	1	ensembl_havana	57995971	58025899	ENSMUSG00000026039	Sgo2a	68549	protein_coding
ENSMUSG00000063558	48.1946	0.361998	0.345489	1.04778	0.294738	0.585422	0.0945865	0.192179	1	ensembl_havana	58029931	58106413	ENSMUSG00000063558	Aox1	11761	protein_coding
ENSMUSG00000064294	70.9485	1.33066	0.362175	3.67407	0.000238715	0.00414746	1.10867	0.39945	1	ensembl_havana	58113130	58200698	ENSMUSG00000064294	Aox3	71724	protein_coding
ENSMUSG00000038242	60.0316	0.716552	0.46394	1.54449	0.122469	0.36494	0.124114	0.228853	1	ensembl_havana	58210397	58268597	ENSMUSG00000038242	Aox4	71872	protein_coding
ENSMUSG00000079554	2.06607	0.314893	1.48362	0.212246	0.831915		0.00536464	0.192429	1	ensembl_havana	58278326	58380259	ENSMUSG00000079554	Aox2	213043	protein_coding
ENSMUSG00000103839	82.4283	-0.366702	0.238464	-1.53776	0.124106	0.366117	-0.177092	0.198916	1	havana	58383512	58386134	ENSMUSG00000103839	Gm37607		TEC
ENSMUSG00000051223	22922.7	-0.316618	0.106878	-2.96243	0.00305222	0.0290883	-0.280762	0.107113	1	ensembl_havana	58392898	58407353	ENSMUSG00000051223	Bzw1	66882	protein_coding
ENSMUSG00000026034	3628.62	-0.408826	0.112327	-3.63959	0.000273076	0.00458229	-0.364429	0.114277	1	ensembl_havana	58410189	58424066	ENSMUSG00000026034	Clk1	12747	protein_coding
ENSMUSG00000026035	900.383	-0.28026	0.103132	-2.71749	0.00657795	0.0521274	-0.241676	0.102114	1	ensembl_havana	58430994	58445486	ENSMUSG00000026035	Ppil3	70225	protein_coding
ENSMUSG00000026036	2128.86	-0.162135	0.080026	-2.02603	0.0427614	0.18985	-0.143746	0.0771472	1	ensembl_havana	58445151	58481816	ENSMUSG00000026036	Nif3l1	65102	protein_coding
ENSMUSG00000026037	6959.66	0.0188738	0.0842136	0.224118	0.822666	0.932691	0.0161441	0.0773057	1	ensembl_havana	58462771	58505109	ENSMUSG00000026037	Orc2	18393	protein_coding
ENSMUSG00000094245	8.51477	0.37773	0.696838	0.542063	0.587775	0.815357	0.0275515	0.18949	1	ensembl	58466515	58466621	ENSMUSG00000094245	Gm23966		snRNA
ENSMUSG00000085054	8.59353	-0.443615	0.716031	-0.619548	0.535556	0.784675	-0.0306036	0.19051	1	havana	58505148	58523230	ENSMUSG00000085054	Gm15834		lincRNA
ENSMUSG00000038174	927.52	-0.0500971	0.114992	-0.435658	0.663085	0.856804	-0.03714	0.0996072	1	ensembl_havana	58522806	58586323	ENSMUSG00000038174	Fam126b	213056	protein_coding
ENSMUSG00000026032	1156.1	-0.0574097	0.104269	-0.550595	0.581911	0.812463	-0.0447228	0.0926317	1	ensembl_havana	58586384	58595964	ENSMUSG00000026032	Ndufb3	66495	protein_coding
ENSMUSG00000059647	12.1796	-1.00036	0.575572	-1.73803	0.0822048	0.289927	-0.118575	0.233555	1	havana	58646688	58647239	ENSMUSG00000059647	Cbx3-ps7		processed_pseudogene
ENSMUSG00000047528	1.5786	0.19458	1.69593	0.114733	0.908656		0.00255592	0.192725	1	ensembl_havana	58646903	58695989	ENSMUSG00000047528	Flacc1	108812	protein_coding
ENSMUSG00000026031	191.699	-1.0836	0.217965	-4.97141	6.64677e-07	3.4195e-05	-0.994495	0.226771	1	ensembl_havana	58711508	58758884	ENSMUSG00000026031	Cflar	12633	protein_coding
ENSMUSG00000026029	46.832	-0.370346	0.454965	-0.81401	0.415639	0.69711	-0.0587614	0.189076	1	ensembl_havana	58795374	58847503	ENSMUSG00000026029	Casp8	12370	protein_coding
ENSMUSG00000102719	32.1757	-0.736243	0.435246	-1.69155	0.0907309	0.306732	-0.15055	0.248624	1	havana	58797783	58801623	ENSMUSG00000102719	Gm37760		TEC
ENSMUSG00000026028	1655.68	0.089589	0.100593	0.890605	0.373141	0.661135	0.0716698	0.0910853	1	ensembl_havana	58900449	58973430	ENSMUSG00000026028	Trak2	70827	protein_coding
ENSMUSG00000026027	250.812	-0.00178975	0.163681	-0.0109344	0.991276	0.996097	-0.000928475	0.125106	1	ensembl_havana	58973522	58995715	ENSMUSG00000026027	Stradb	227154	protein_coding
ENSMUSG00000072295	9.06497	1.63453	0.80774	2.02359	0.0430126	0.19062	0.100669	0.227395	1	ensembl_havana	58997116	59094900	ENSMUSG00000072295	C2cd6	73463	protein_coding
ENSMUSG00000038079	664.015	-0.132443	0.119417	-1.10908	0.267395	0.557266	-0.0990895	0.106482	1	ensembl_havana	59100590	59120408	ENSMUSG00000038079	Tmem237	381259	protein_coding
ENSMUSG00000097573	3.72166	-0.562514	1.02963	-0.546327	0.584841		-0.019236	0.191999	1	ensembl_havana	59119833	59122141	ENSMUSG00000097573	G730003C15Rik		antisense
ENSMUSG00000079550	5.68142	0.432634	0.907875	0.476534	0.633694		0.019083	0.191008	1	ensembl_havana	59120935	59163389	ENSMUSG00000079550	Mpp4	227157	protein_coding
ENSMUSG00000026024	2568.37	0.163048	0.118205	1.37936	0.167783	0.434182	0.125122	0.107831	1	ensembl_havana	59162926	59237231	ENSMUSG00000026024	Als2	74018	protein_coding
ENSMUSG00000026023	8.21422	1.13574	0.936032	1.21336	0.224993	0.510707	0.0477949	0.198554	1	ensembl_havana	59256906	59352993	ENSMUSG00000026023	Cdk15	271697	protein_coding
ENSMUSG00000099922	4.53632	-0.137703	1.01756	-0.135327	0.892353		-0.00476075	0.190606	1	havana	59378930	59392299	ENSMUSG00000099922	Gm29016		lincRNA
ENSMUSG00000104502	2.10927	-1.91325	1.47544	-1.29673	0.194725		-0.0335016	0.196603	1	havana	59447865	59449502	ENSMUSG00000104502	Gm37737		TEC
ENSMUSG00000041075	3131.05	-0.453291	0.120651	-3.75704	0.000171932	0.00325006	-0.402897	0.123458	1	ensembl_havana	59482424	59486955	ENSMUSG00000041075	Fzd7	14369	protein_coding
ENSMUSG00000047361	132.92	0.152013	0.242082	0.627943	0.530041	0.781924	0.0615055	0.15819	1	ensembl_havana	59516264	59636417	ENSMUSG00000047361	Gm973	381260	protein_coding
ENSMUSG00000026021	8207.32	-0.0255624	0.0934926	-0.273416	0.784533	0.916352	-0.0207513	0.0843542	1	ensembl_havana	59586558	59670834	ENSMUSG00000026021	Sumo1	22218	protein_coding
ENSMUSG00000103821	44.0268	-0.377287	0.312445	-1.20753	0.227228	0.513427	-0.118061	0.197485	1	havana	59646200	59648071	ENSMUSG00000103821	D430013B06Rik		TEC
ENSMUSG00000026020	22300.7	-0.168623	0.0803087	-2.09969	0.0357563	0.168792	-0.149082	0.0775564	1	ensembl_havana	59684971	59719044	ENSMUSG00000026020	Nop58	55989	protein_coding
ENSMUSG00000077345	21.8286	-0.539589	0.539098	-1.00091	0.31687	0.606566	-0.0643137	0.19626	1	ensembl	59691934	59692020	ENSMUSG00000077345	Snord70		snoRNA
ENSMUSG00000089512	29.0267	-0.223742	0.440491	-0.507937	0.611498	0.828395	-0.036709	0.181566	1	ensembl	59704258	59704338	ENSMUSG00000089512	Gm26287	115487683	snoRNA
ENSMUSG00000089093	6.31163	-0.316462	0.764426	-0.413986	0.678884		-0.0191416	0.189312	1	ensembl	59704790	59704873	ENSMUSG00000089093	Snord11		snoRNA
ENSMUSG00000067336	1270.36	0.146242	0.14987	0.975791	0.329168	0.618897	0.0955901	0.125912	1	ensembl_havana	59763400	59879014	ENSMUSG00000067336	Bmpr2	12168	protein_coding
ENSMUSG00000041040	1696.52	0.065243	0.139886	0.466401	0.640928	0.845274	0.0433913	0.114887	1	ensembl_havana	59913006	59985346	ENSMUSG00000041040	Fam117b	72750	protein_coding
ENSMUSG00000026018	15.844	-0.399573	0.52198	-0.765495	0.443977	0.718281	-0.0496983	0.18981	1	ensembl_havana	59982490	60043184	ENSMUSG00000026018	Ica1l	70375	protein_coding
ENSMUSG00000026019	4674.28	-0.205054	0.0778996	-2.63229	0.00848116	0.0634997	-0.1842	0.0763094	1	ensembl_havana	60069785	60098645	ENSMUSG00000026019	Wdr12	57750	protein_coding
ENSMUSG00000026017	185.879	-0.2008	0.167754	-1.19699	0.231309	0.517538	-0.123676	0.141241	1	ensembl_havana	60098247	60153953	ENSMUSG00000026017	Carf	241066	protein_coding
ENSMUSG00000082609	5.89532	-0.510806	1.10314	-0.463045	0.643332		-0.0151935	0.19193	1	havana	60117255	60117685	ENSMUSG00000082609	Gm15464	100504573	processed_pseudogene
ENSMUSG00000073664	1163.61	-0.118892	0.093779	-1.26779	0.204872	0.485898	-0.0983214	0.0870705	1	ensembl_havana	60180599	60338328	ENSMUSG00000073664	Nbeal1	269198	protein_coding
ENSMUSG00000049439	858.286	-0.175566	0.133996	-1.31023	0.190118	0.465489	-0.125738	0.119495	1	ensembl_havana	60343323	60388060	ENSMUSG00000049439	Cyp20a1	77951	protein_coding
ENSMUSG00000026782	2692.41	-0.264246	0.0802353	-3.29339	0.000989875	0.0124335	-0.240907	0.0797405	1	ensembl_havana	60409619	60481158	ENSMUSG00000026782	Abi2	329165	protein_coding
ENSMUSG00000026014	2745.91	-0.242086	0.113802	-2.12725	0.0333994	0.162349	-0.197196	0.109903	1	ensembl_havana	60482292	60567104	ENSMUSG00000026014	Raph1	77300	protein_coding
ENSMUSG00000081562	4.6845	0.393574	0.895188	0.439655	0.660187		0.01788	0.190699	1	havana	60522839	60523066	ENSMUSG00000081562	Gm11575		processed_pseudogene
ENSMUSG00000101188	1667.29	-0.0499982	0.0912402	-0.547985	0.583702	0.813092	-0.041039	0.0830512	1	havana	60703932	60705149	ENSMUSG00000101188	Eif4a-ps4		processed_pseudogene
ENSMUSG00000026012	6.1079	-0.961455	0.84648	-1.13583	0.256029		-0.0492737	0.197979	1	ensembl_havana	60716800	60773359	ENSMUSG00000026012	Cd28	12487	protein_coding
ENSMUSG00000086795	1.54451	2.7682	1.87149	1.47914	0.139102		0.028971	0.196215	1	havana	60776665	60781834	ENSMUSG00000086795	Gm11579		lincRNA
ENSMUSG00000083355	2.384	0.234888	1.34909	0.174109	0.86178		0.00483831	0.192066	1	havana	60809116	60809942	ENSMUSG00000083355	Gm11581		processed_pseudogene
ENSMUSG00000102549	2.26942	1.0761	1.57939	0.681337	0.495658		0.0161074	0.193533	1	havana	60880338	60881738	ENSMUSG00000102549	Gm38137		TEC
ENSMUSG00000081382	60.8989	0.569946	0.274458	2.07662	0.0378365	0.174989	0.297398	0.284743	1	havana	60900898	60901422	ENSMUSG00000081382	Rpl18-ps1	667100	processed_pseudogene
ENSMUSG00000052062	4.67602	-0.82448	0.976442	-0.844371	0.398462		-0.0313878	0.19394	1	ensembl_havana	61638824	62642284	ENSMUSG00000052062	Pard3b	72823	protein_coding
ENSMUSG00000084333	7.07855	0.787321	0.825245	0.954045	0.340061		0.0422903	0.195302	1	havana	62660839	62661716	ENSMUSG00000084333	Gm11599	108167598	processed_pseudogene
ENSMUSG00000025969	1037.57	0.472513	0.56804	0.83183	0.405505	0.689456	0.0509967	0.192403	1	ensembl_havana	62703285	62818695	ENSMUSG00000025969	Nrp2	18187	protein_coding
ENSMUSG00000103032	4.35096	0.175626	1.00106	0.17544	0.860734		0.00642583	0.190583	1	havana	62809302	62811857	ENSMUSG00000103032	Gm37121		TEC
ENSMUSG00000040865	2243.98	0.153619	0.111407	1.37889	0.167927	0.434342	0.120503	0.102255	1	ensembl_havana	62958418	63114667	ENSMUSG00000040865	Ino80d	227195	protein_coding
ENSMUSG00000084799	55.4775	0.591885	0.291059	2.03356	0.041996	0.187433	0.284481	0.296556	1	havana	63113078	63158290	ENSMUSG00000084799	Ino80dos	100380944	lincRNA
ENSMUSG00000101599	68.4216	0.0789891	0.303066	0.260634	0.794375	0.919615	0.0232371	0.164641	1	havana	63117118	63126837	ENSMUSG00000101599	Gm20342		lincRNA
ENSMUSG00000025968	6786.38	0.0644652	0.0801684	0.804122	0.421327	0.700702	0.0551396	0.0746949	1	ensembl_havana	63143596	63176833	ENSMUSG00000025968	Ndufs1	227197	protein_coding
ENSMUSG00000025967	34389.6	-0.160749	0.0895551	-1.79497	0.0726589	0.26786	-0.137289	0.0853044	1	ensembl_havana	63176825	63180486	ENSMUSG00000025967	Eef1b2	55949	protein_coding
ENSMUSG00000064612	12.6695	-0.0405242	0.593719	-0.0682548	0.945583	0.981073	-0.00377317	0.184397	1	ensembl	63178677	63178754	ENSMUSG00000064612	Gm26457	115487641	snoRNA
ENSMUSG00000064602	150.576	-0.507393	0.191574	-2.64855	0.00808386	0.061408	-0.38023	0.202499	1	ensembl	63179004	63179135	ENSMUSG00000064602	Snora41	100217464	snoRNA
ENSMUSG00000046856	15.9687	-1.83715	0.632581	-2.90422	0.00368175	0.0338222	-1.2117	0.86412	1	ensembl_havana	63182691	63214543	ENSMUSG00000046856	Gpr1	241070	protein_coding
ENSMUSG00000086730	127.508	0.898418	0.274934	3.26776	0.00108403	0.0133144	0.71454	0.306015	1	havana	63200313	63207967	ENSMUSG00000086730	Platr12		processed_transcript
ENSMUSG00000027520	4499.38	0.419516	0.189211	2.21719	0.0266104	0.140605	0.289955	0.191793	1	ensembl_havana	63273265	63314576	ENSMUSG00000027520	Zdbf2	73884	protein_coding
ENSMUSG00000081643	18.0291	0.183924	0.509059	0.361302	0.717874	0.887851	0.0236632	0.182998	1	havana	63364720	63365365	ENSMUSG00000081643	Gm11605		processed_pseudogene
ENSMUSG00000025964	4169.38	-0.0612927	0.130969	-0.467995	0.639788	0.844872	-0.0423187	0.10973	1	ensembl_havana	63445891	63596276	ENSMUSG00000025964	Adam23	23792	protein_coding
ENSMUSG00000025963	4.58226	-2.05224	0.98792	-2.07733	0.0377707		-0.0858378	0.218594	1	ensembl_havana	63698819	63730318	ENSMUSG00000025963	Mdh1b	76668	protein_coding
ENSMUSG00000025962	2134.74	-0.251021	0.0834343	-3.00861	0.00262447	0.0260837	-0.225952	0.0825654	1	ensembl_havana	63730614	63754655	ENSMUSG00000025962	Fastkd2	75619	protein_coding
ENSMUSG00000025959	648.593	-0.368116	0.181476	-2.02846	0.0425137	0.189105	-0.248576	0.177462	1	ensembl_havana	64029447	64122282	ENSMUSG00000025959	Klf7	93691	protein_coding
ENSMUSG00000025958	2017.65	-0.493573	0.128413	-3.84363	0.000121229	0.00244313	-0.439459	0.132061	1	ensembl_havana	64532645	64604548	ENSMUSG00000025958	Creb1	12912	protein_coding
ENSMUSG00000025956	395.09	-0.0566004	0.175053	-0.323333	0.746443	0.900817	-0.0309038	0.131076	1	ensembl_havana	64606473	64617242	ENSMUSG00000025956	Mettl21a	67099	protein_coding
ENSMUSG00000087213	228.526	0.172302	0.147417	1.16881	0.242482	0.531481	0.115739	0.127226	1	havana	64679871	64690659	ENSMUSG00000087213	2810408I11Rik	69941	processed_transcript
ENSMUSG00000070871	1206.96	0.087341	0.124511	0.70147	0.48301	0.748257	0.062947	0.107065	1	ensembl_havana	64690455	64725644	ENSMUSG00000070871	Ccnyl1	227210	protein_coding
ENSMUSG00000045005	3335.18	0.245332	0.158119	1.55156	0.120767	0.362471	0.165115	0.142704	1	ensembl_havana	64730558	64737751	ENSMUSG00000045005	Fzd5	14367	protein_coding
ENSMUSG00000102140	3.18926	-0.476992	1.08002	-0.441652	0.658741		-0.0148672	0.191742	1	havana	64736240	64740607	ENSMUSG00000102140	Gm38058		TEC
ENSMUSG00000051344	542.484	0.207766	0.134004	1.55045	0.121034	0.362575	0.15238	0.122722	1	ensembl_havana	64785983	64956824	ENSMUSG00000051344	Plekhm3	241075	protein_coding
ENSMUSG00000084416	708.368	0.00964233	0.153678	0.0627436	0.949971	0.982015	0.00609888	0.120487	1	havana	64993951	64994604	ENSMUSG00000084416	Rpl10a-ps1	100043141	processed_pseudogene
ENSMUSG00000025955	32.823	2.24345	0.457811	4.90038	9.56529e-07	4.54034e-05	2.04407	0.478052	1	ensembl_havana	65012689	65032759	ENSMUSG00000025955	Akr1cl	70861	protein_coding
ENSMUSG00000090042	4.90795	0.954348	0.961344	0.992723	0.320845		0.0383093	0.195536	1	havana	65028080	65028732	ENSMUSG00000090042	Gm8550		processed_pseudogene
ENSMUSG00000070870	10.4208	2.38097	0.905023	2.63083	0.00851757	0.0637167	0.120788	0.249371	1	ensembl_havana	65048554	65051149	ENSMUSG00000070870	Cryge	12968	protein_coding
ENSMUSG00000067299	7.03305	1.47385	0.838121	1.75852	0.0786592		0.0821655	0.214222	1	ensembl_havana	65061872	65063452	ENSMUSG00000067299	Crygd	12967	protein_coding
ENSMUSG00000025952	3.54039	1.91716	1.4039	1.36559	0.172067		0.0360501	0.197241	1	ensembl_havana	65071525	65073689	ENSMUSG00000025952	Crygc	12966	protein_coding
ENSMUSG00000073658	2.37063	-0.684982	1.43864	-0.476132	0.63398		-0.0121457	0.192809	1	ensembl_havana	65080219	65082288	ENSMUSG00000073658	Crygb	12965	protein_coding
ENSMUSG00000100774	3.71497	1.59923	1.07421	1.48874	0.136556		0.0543485	0.201843	1	havana	65095227	65095436	ENSMUSG00000100774	Gm7329		processed_pseudogene
ENSMUSG00000044429	2.64455	2.61368	1.4615	1.78836	0.0737182		0.0523802	0.202563	1	ensembl_havana	65100389	65103373	ENSMUSG00000044429	Cryga	12964	protein_coding
ENSMUSG00000044816	443.836	0.0406594	0.158349	0.256771	0.797356	0.920787	0.0245903	0.123256	1	ensembl_havana	65105285	65123214	ENSMUSG00000044816	D630023F18Rik	98303	protein_coding
ENSMUSG00000025950	4594.54	0.508765	0.102279	4.97431	6.54802e-07	3.37882e-05	0.475938	0.104114	1	ensembl_havana	65158616	65186500	ENSMUSG00000025950	Idh1	15926	protein_coding
ENSMUSG00000025949	2309.51	-0.0168737	0.105631	-0.159741	0.873085	0.952346	-0.0124917	0.0928297	1	ensembl_havana	65186683	65278695	ENSMUSG00000025949	Pikfyve	18711	protein_coding
ENSMUSG00000025946	5.03247	-0.275652	0.995631	-0.276862	0.781886		-0.0104307	0.190799	1	ensembl_havana	65282056	65389244	ENSMUSG00000025946	Pth2r	213527	protein_coding
ENSMUSG00000015222	282.734	-0.708105	0.247783	-2.85776	0.00426644	0.0377111	-0.523474	0.277445	1	ensembl_havana	66175273	66442583	ENSMUSG00000015222	Map2	17756	protein_coding
ENSMUSG00000055567	15.3004	-0.306253	0.560374	-0.546516	0.584712	0.813519	-0.0331115	0.186898	1	ensembl_havana	66468367	66699148	ENSMUSG00000055567	Unc80	329178	protein_coding
ENSMUSG00000026005	3278.92	-0.246844	0.110817	-2.22749	0.0259144	0.138381	-0.203609	0.1076	1	ensembl_havana	66700831	66719805	ENSMUSG00000026005	Rpe	66646	protein_coding
ENSMUSG00000026004	181.256	0.0922845	0.176552	0.522703	0.601181	0.823026	0.0513972	0.133591	1	ensembl_havana	66719248	66817562	ENSMUSG00000026004	Kansl1l	68691	protein_coding
ENSMUSG00000102559	2.27264	1.04816	1.32086	0.793543	0.427461		0.0225865	0.193796	1	havana	66765626	66768731	ENSMUSG00000102559	Gm37570		TEC
ENSMUSG00000102776	7.37161	-0.3045	0.734553	-0.414538	0.67848		-0.0197972	0.188935	1	havana	66775511	66780107	ENSMUSG00000102776	Gm38162		TEC
ENSMUSG00000103756	33.2999	-0.0577811	0.341844	-0.169028	0.865775	0.94974	-0.0139588	0.169198	1	havana	66799659	66800797	ENSMUSG00000103756	Gm37285		TEC
ENSMUSG00000103382	7.67361	-0.585137	0.826462	-0.708003	0.478944		-0.0306081	0.192273	1	havana	66812315	66814493	ENSMUSG00000103382	Gm37755		TEC
ENSMUSG00000026003	663.347	-0.12656	0.15247	-0.830067	0.406501	0.690003	-0.0804807	0.125376	1	ensembl_havana	66830839	66863277	ENSMUSG00000026003	Acadl	11363	protein_coding
ENSMUSG00000082769	6.73091	0.195805	0.859312	0.227862	0.819753		0.00961538	0.189537	1	havana	66849108	66849602	ENSMUSG00000082769	Gm15793	102640707	processed_pseudogene
ENSMUSG00000094191	6.28726	0.00834807	0.797522	0.0104675	0.991648		0.000570026	0.188474	1	ensembl_havana	66948563	66948940	ENSMUSG00000094191	Rpl31-ps14	100043192	processed_pseudogene
ENSMUSG00000026000	1022.66	0.111498	0.100253	1.11217	0.266067	0.556109	0.0900323	0.0917447	1	ensembl_havana	67000517	67038872	ENSMUSG00000026000	Lancl1	14768	protein_coding
ENSMUSG00000025991	37.4272	-0.0476635	0.348479	-0.136776	0.891208	0.961656	-0.0110416	0.169796	1	ensembl_havana	67123026	67231259	ENSMUSG00000025991	Cps1	227231	protein_coding
ENSMUSG00000025997	29.8221	-0.70673	0.401736	-1.75919	0.0785454	0.281822	-0.172944	0.264125	1	ensembl_havana	69531214	69687245	ENSMUSG00000025997	Ikzf2	22779	protein_coding
ENSMUSG00000053153	26.9766	-0.273892	0.400776	-0.683403	0.494352	0.757366	-0.0533061	0.182695	1	ensembl_havana	69826970	70725132	ENSMUSG00000053153	Spag16	66722	protein_coding
ENSMUSG00000026196	1735.8	-0.16022	0.122462	-1.30833	0.190762	0.466333	-0.120114	0.110559	1	ensembl_havana	71027498	71103146	ENSMUSG00000026196	Bard1	12021	protein_coding
ENSMUSG00000089965	5.49922	0.19771	0.89599	0.220661	0.825357		0.00898511	0.189851	1	havana	71039652	71040030	ENSMUSG00000089965	Gm16236		processed_pseudogene
ENSMUSG00000050296	13.504	-0.339896	0.733652	-0.463293	0.643154	0.846715	-0.0222444	0.18927	1	ensembl_havana	71242276	71414910	ENSMUSG00000050296	Abca12	74591	protein_coding
ENSMUSG00000026192	10438.5	-0.0418427	0.0944523	-0.443004	0.657763	0.853715	-0.0343276	0.0852931	1	ensembl_havana	71557150	71579631	ENSMUSG00000026192	Atic	108147	protein_coding
ENSMUSG00000026193	23584.5	-0.0171794	0.127169	-0.135091	0.89254	0.962067	-0.0117617	0.106429	1	ensembl_havana	71585520	71653200	ENSMUSG00000026193	Fn1	14268	protein_coding
ENSMUSG00000073652	15.6368	-0.0593021	0.525552	-0.112838	0.910159	0.967934	-0.00695633	0.182142	1	ensembl_havana	71652837	71662843	ENSMUSG00000073652	Apol7d	100042814	antisense
ENSMUSG00000101834	3.21935	0.590465	1.10873	0.53256	0.594338		0.017769	0.192216	1	havana	71709705	71710055	ENSMUSG00000101834	Gm5829		processed_pseudogene
ENSMUSG00000100319	8.32698	0.866765	0.724407	1.19652	0.231495	0.51767	0.0610672	0.200633	1	havana	71714048	71714924	ENSMUSG00000100319	Gm5256		processed_pseudogene
ENSMUSG00000101496	36.465	-0.483779	0.338719	-1.42826	0.153217	0.41246	-0.141715	0.219122	1	havana	72087857	72088454	ENSMUSG00000101496	Gm8885	667937	processed_pseudogene
ENSMUSG00000039395	5132.44	-0.0847155	0.1318	-0.642756	0.520382	0.77591	-0.0587057	0.111277	1	ensembl_havana	72159442	72212307	ENSMUSG00000039395	Mreg	381269	protein_coding
ENSMUSG00000094655	3.91736	0.728938	1.07092	0.680669	0.496081		0.0234219	0.192896	1	ensembl	72226240	72226430	ENSMUSG00000094655	Gm25360		snRNA
ENSMUSG00000094050	1.67848	-0.931091	1.77781	-0.523731	0.600466		-0.0109028	0.193303	1	ensembl	72236946	72237136	ENSMUSG00000094050	Gm23472		snRNA
ENSMUSG00000093956	5.12781	-0.219318	0.845801	-0.259302	0.795402		-0.0108861	0.189487	1	ensembl	72244213	72244403	ENSMUSG00000093956	Gm24497		snRNA
ENSMUSG00000026189	814.848	-0.0581625	0.149906	-0.387994	0.698021	0.877338	-0.0365092	0.119783	1	ensembl_havana	72259167	72284314	ENSMUSG00000026189	Pecr	111175	protein_coding
ENSMUSG00000026188	16.0668	0.244335	0.645726	0.378387	0.705143	0.881903	0.0204289	0.187207	1	ensembl_havana	72284369	72303104	ENSMUSG00000026188	Tmem169	271711	protein_coding
ENSMUSG00000026187	6455.35	0.0273665	0.0730727	0.37451	0.708025	0.882681	0.0241586	0.0684762	1	ensembl_havana	72307427	72394952	ENSMUSG00000026187	Xrcc5	22596	protein_coding
ENSMUSG00000039354	1355.58	-0.0036431	0.110397	-0.0330001	0.973674	0.990457	-0.00263301	0.0959531	1	ensembl_havana	72583251	72633134	ENSMUSG00000039354	Smarcal1	54380	protein_coding
ENSMUSG00000110712	8.6623	0.678552	0.697819	0.972391	0.330856	0.620584	0.0505121	0.195808	1	havana	72641188	72642963	ENSMUSG00000110712	Gm39662		antisense
ENSMUSG00000046330	15216.8	-0.100738	0.090742	-1.11016	0.266931	0.55677	-0.085002	0.0840763	1	ensembl_havana	72711290	72713813	ENSMUSG00000046330	Rpl37a	19981	protein_coding
ENSMUSG00000039323	4679.31	0.0320101	0.12706	0.25193	0.801095	0.922206	0.0225699	0.106604	1	ensembl_havana	72824503	72852474	ENSMUSG00000039323	Igfbp2	16008	protein_coding
ENSMUSG00000026185	25.8326	0.103797	0.484604	0.214189	0.8304	0.935999	0.0145674	0.180699	1	ensembl_havana	72857932	72874884	ENSMUSG00000026185	Igfbp5	16011	protein_coding
ENSMUSG00000100444	2.12027	0.368281	1.28259	0.287139	0.774006		0.00830977	0.192031	1	havana	73522095	73529790	ENSMUSG00000100444	C530043A13Rik		lincRNA
ENSMUSG00000100301	2.0236	1.41484	1.47393	0.959905	0.337103		0.024845	0.194615	1	havana	73618088	73864466	ENSMUSG00000100301	6030407O03Rik	109198	lincRNA
ENSMUSG00000101344	2.67685	0.544961	1.32035	0.412739	0.679797		0.0116433	0.192407	1	havana	73750321	73841917	ENSMUSG00000101344	Gm29183		lincRNA
ENSMUSG00000055322	460.324	1.52093	0.23333	6.51836	7.10797e-11	1.06205e-08	1.44879	0.239002	1	ensembl_havana	73910231	74124449	ENSMUSG00000055322	Tns1	21961	protein_coding
ENSMUSG00000061815	7.33536	2.48083	0.923762	2.68557	0.00724061		0.135495	0.265597	1	ensembl_havana	74125541	74148223	ENSMUSG00000061815	Rufy4	435626	protein_coding
ENSMUSG00000006304	5086.59	-0.0362843	0.122003	-0.297405	0.766157	0.908244	-0.0259651	0.103665	1	ensembl_havana	74236084	74268209	ENSMUSG00000006304	Arpc2	76709	protein_coding
ENSMUSG00000006299	4668.84	0.189301	0.0919313	2.05915	0.0394794	0.179929	0.162392	0.0884667	1	ensembl_havana	74279840	74284738	ENSMUSG00000006299	Aamp	227290	protein_coding
ENSMUSG00000026179	1182.04	0.0351861	0.120773	0.291342	0.77079	0.909836	0.0256654	0.102899	1	ensembl_havana	74284930	74353694	ENSMUSG00000026179	Pnkd	56695	protein_coding
ENSMUSG00000006301	654.377	0.553497	0.115528	4.791	1.65955e-06	7.35065e-05	0.513184	0.118142	1	ensembl_havana	74288247	74305622	ENSMUSG00000006301	Tmbim1	69660	protein_coding
ENSMUSG00000099931	1.63277	0.26013	1.57589	0.165068	0.86889		0.00391599	0.192567	1	havana	74295603	74298867	ENSMUSG00000099931	Gm29358		sense_intronic
ENSMUSG00000073650	271.761	-0.461659	0.606231	-0.761524	0.446344	0.720494	-0.0436235	0.191339	1	ensembl_havana	74362108	74369321	ENSMUSG00000073650	Catip	241112	protein_coding
ENSMUSG00000026177	232.765	-0.075695	0.302636	-0.250119	0.802495	0.922915	-0.0219045	0.164427	1	ensembl_havana	74375195	74386062	ENSMUSG00000026177	Slc11a1	18173	protein_coding
ENSMUSG00000026176	1297.22	0.128843	0.123778	1.04092	0.297911	0.588392	0.094734	0.109143	1	ensembl_havana	74391509	74397285	ENSMUSG00000026176	Ctdsp1	227292	protein_coding
ENSMUSG00000026175	64.0313	0.442439	0.260805	1.69644	0.0898026	0.304794	0.205327	0.226243	1	ensembl_havana	74409376	74435559	ENSMUSG00000026175	Vil1	22349	protein_coding
ENSMUSG00000033364	2967.56	-0.108286	0.111831	-0.968303	0.332893	0.622659	-0.0828864	0.0998765	1	ensembl_havana	74435511	74544284	ENSMUSG00000033364	Usp37	319651	protein_coding
ENSMUSG00000103227	4.58387	-0.129905	0.917906	-0.141523	0.887457		-0.00547878	0.189878	1	havana	74500340	74503301	ENSMUSG00000103227	Gm37733		TEC
ENSMUSG00000026174	4820.26	-0.194201	0.101238	-1.91826	0.0550783	0.224014	-0.161189	0.0965994	1	ensembl_havana	74506058	74530842	ENSMUSG00000026174	Cnot9	58184	protein_coding
ENSMUSG00000026173	79.4593	0.447028	0.267217	1.6729	0.0943463	0.314693	0.198184	0.226607	1	ensembl_havana	74542888	74567794	ENSMUSG00000026173	Plcd4	18802	protein_coding
ENSMUSG00000026135	1614.98	0.00189527	0.089158	0.0212575	0.98304	0.9939	0.00161988	0.0810101	1	ensembl_havana	74565127	74588246	ENSMUSG00000026135	Zfp142	77264	protein_coding
ENSMUSG00000026172	601.521	0.0349736	0.151195	0.231314	0.817071	0.929809	0.0217135	0.119649	1	ensembl_havana	74588289	74592443	ENSMUSG00000026172	Bcs1l	66821	protein_coding
ENSMUSG00000026171	756.047	-0.160791	0.117425	-1.36931	0.170902	0.438615	-0.122838	0.107038	1	ensembl_havana	74593748	74601397	ENSMUSG00000026171	Rnf25	57751	protein_coding
ENSMUSG00000033276	119.463	-0.229821	0.244925	-0.938332	0.348074	0.637017	-0.0945157	0.168162	1	ensembl_havana	74601445	74636894	ENSMUSG00000033276	Stk36	269209	protein_coding
ENSMUSG00000033257	4511.04	-0.131524	0.149718	-0.878482	0.379682	0.667326	-0.0850806	0.124421	1	ensembl_havana	74661745	74703730	ENSMUSG00000033257	Ttll4	67534	protein_coding
ENSMUSG00000026170	50.5088	0.383635	0.385968	0.993955	0.320245	0.60986	0.0831035	0.19265	1	ensembl_havana	74713574	74737892	ENSMUSG00000026170	Cyp27a1	104086	protein_coding
ENSMUSG00000006542	13.2563	0.75037	0.602948	1.2445	0.213315	0.496463	0.075626	0.204293	1	ensembl_havana	74738922	74749221	ENSMUSG00000006542	Prkag3	241113	protein_coding
ENSMUSG00000033227	61.7727	1.07855	0.356516	3.02526	0.00248418	0.0250944	0.792942	0.421856	1	ensembl_havana	74771892	74785322	ENSMUSG00000033227	Wnt6	22420	protein_coding
ENSMUSG00000099472	3.57033	2.43101	1.24872	1.9468	0.0515587		0.0652932	0.207848	1	havana	74774943	74777405	ENSMUSG00000099472	Gm29539		antisense
ENSMUSG00000026167	9.81697	0.840387	0.764109	1.09983	0.271408	0.561541	0.052527	0.197997	1	ensembl_havana	74791516	74804179	ENSMUSG00000026167	Wnt10a	22409	protein_coding
ENSMUSG00000090071	79.2276	1.21352	0.327456	3.7059	0.000210642	0.00377226	1.01802	0.358586	1	ensembl_havana	74854934	74857732	ENSMUSG00000090071	Cdk5r2	12570	protein_coding
ENSMUSG00000047021	5.4224	-0.498669	0.911247	-0.547238	0.584215		-0.0215678	0.191442	1	ensembl_havana	74902071	74935599	ENSMUSG00000047021	Cfap65	241116	protein_coding
ENSMUSG00000006538	17.5777	1.12065	0.767891	1.45939	0.144458	0.397856	0.06997	0.206347	1	ensembl_havana	74945315	74951672	ENSMUSG00000006538	Ihh	16147	protein_coding
ENSMUSG00000026162	233.218	-0.0660262	0.166676	-0.396135	0.692006	0.874319	-0.0381457	0.127965	1	ensembl_havana	74967139	75125200	ENSMUSG00000026162	Nhej1	75570	protein_coding
ENSMUSG00000026205	1.70301	1.08136	1.78384	0.606196	0.544385		0.0127254	0.193465	1	ensembl_havana	75125541	75133890	ENSMUSG00000026205	Slc23a3	22626	protein_coding
ENSMUSG00000033159	729.061	0.2339	0.13045	1.79302	0.0729695	0.268832	0.177689	0.1227	1	ensembl_havana	75134554	75142711	ENSMUSG00000033159	Cnppd1	69171	protein_coding
ENSMUSG00000049339	623.146	0.121814	0.138415	0.880061	0.378826	0.666734	0.0834037	0.117503	1	ensembl_havana	75142778	75147913	ENSMUSG00000049339	Retreg2	227298	protein_coding
ENSMUSG00000026197	286.792	0.294554	0.165661	1.77805	0.0753956	0.274062	0.199656	0.154688	1	ensembl_havana	75168646	75171629	ENSMUSG00000026197	Zfand2b	68818	protein_coding
ENSMUSG00000026198	35.3927	0.330384	0.352446	0.937404	0.348551	0.637521	0.082323	0.187565	1	ensembl_havana	75171717	75180392	ENSMUSG00000026198	Abcb6	74104	protein_coding
ENSMUSG00000033124	366.238	0.210743	0.128109	1.64503	0.0999634	0.325934	0.15906	0.118832	1	ensembl_havana	75180860	75192196	ENSMUSG00000033124	Atg9a	245860	protein_coding
ENSMUSG00000026199	1004.49	-0.266045	0.115599	-2.30146	0.0213656	0.123088	-0.21841	0.112901	1	ensembl_havana	75192151	75199387	ENSMUSG00000026199	Ankzf1	52231	protein_coding
ENSMUSG00000026200	124.549	-0.289976	0.230977	-1.25543	0.209322	0.491364	-0.135295	0.17749	1	ensembl_havana	75198236	75210813	ENSMUSG00000026200	Glb1l	74577	protein_coding
ENSMUSG00000026201	1058.82	-0.124443	0.106759	-1.16565	0.243756	0.532851	-0.0979864	0.0971359	1	ensembl_havana	75210838	75215606	ENSMUSG00000026201	Stk16	20872	protein_coding
ENSMUSG00000026202	5968.06	0.167322	0.156778	1.06726	0.285855	0.575161	0.106034	0.131529	1	ensembl_havana	75214228	75219865	ENSMUSG00000026202	Tuba4a	22145	protein_coding
ENSMUSG00000096094	8.8291	1.5694	0.952946	1.64689	0.0995806	0.325118	0.0643221	0.205989	1	ensembl_havana	75220095	75232102	ENSMUSG00000096094	A630095N17Rik	381272	protein_coding
ENSMUSG00000118482	2.72456	1.44817	1.39801	1.03588	0.300256		0.0278726	0.195101	1	havana	75229552	75229779	ENSMUSG00000118482	Gm50472		processed_pseudogene
ENSMUSG00000026203	410.973	0.366413	0.169902	2.15661	0.031036	0.155257	0.261543	0.168309	1	ensembl_havana	75236406	75245692	ENSMUSG00000026203	Dnajb2	56812	protein_coding
ENSMUSG00000026204	217.949	-0.381718	0.253124	-1.50803	0.131548	0.378132	-0.171679	0.204521	1	ensembl_havana	75247027	75264502	ENSMUSG00000026204	Ptprn	19275	protein_coding
ENSMUSG00000026209	1622.63	0.314263	0.141306	2.22398	0.0261496	0.139068	0.24157	0.138716	1	ensembl_havana	75307896	75317990	ENSMUSG00000026209	Dnpep	13437	protein_coding
ENSMUSG00000026208	355.433	0.84114	0.240218	3.50157	0.000462521	0.00700838	0.698526	0.260753	1	ensembl_havana	75360329	75368579	ENSMUSG00000026208	Des	13346	protein_coding
ENSMUSG00000026207	217.711	-0.1391	0.194289	-0.715944	0.474026	0.74128	-0.0715206	0.144034	1	ensembl_havana	75375297	75432320	ENSMUSG00000026207	Speg	11790	protein_coding
ENSMUSG00000033021	969.505	0.152289	0.11384	1.33775	0.180978	0.452722	0.11854	0.103969	1	ensembl_havana	75435930	75443179	ENSMUSG00000033021	Gmppa	69080	protein_coding
ENSMUSG00000032997	660.984	0.377582	0.106758	3.53679	0.000405014	0.00629464	0.337007	0.108089	1	ensembl_havana	75474569	75479307	ENSMUSG00000032997	Chpf	74241	protein_coding
ENSMUSG00000026211	997.812	0.18744	0.132697	1.41254	0.157792	0.419776	0.136431	0.119845	1	ensembl_havana	75479310	75506452	ENSMUSG00000026211	Obsl1	98733	protein_coding
ENSMUSG00000051703	18.4539	0.448798	0.497906	0.901371	0.367391	0.65568	0.0618766	0.192901	1	ensembl_havana	75479532	75485705	ENSMUSG00000051703	Tmem198	319998	protein_coding
ENSMUSG00000032968	13.533	0.521601	0.617786	0.844307	0.398498	0.68303	0.0482428	0.193008	1	ensembl_havana	75507077	75510366	ENSMUSG00000032968	Inha	16322	protein_coding
ENSMUSG00000082745	3.31459	-0.630117	1.08376	-0.58142	0.560957		-0.0196478	0.192369	1	havana	75514107	75514283	ENSMUSG00000082745	Gm15181		unprocessed_pseudogene
ENSMUSG00000026213	1372.94	-0.101185	0.102592	-0.98628	0.323995	0.61407	-0.0803296	0.0930016	1	ensembl_havana	75521529	75537335	ENSMUSG00000026213	Stk11ip	71728	protein_coding
ENSMUSG00000006576	280.193	0.00897689	0.155991	0.0575476	0.954109	0.983884	0.00558258	0.12159	1	ensembl_havana	75546266	75562172	ENSMUSG00000006576	Slc4a3	20536	protein_coding
ENSMUSG00000026235	3467.19	0.199736	0.179332	1.11378	0.265375	0.55538	0.116579	0.146338	1	ensembl_havana	77367185	77515088	ENSMUSG00000026235	Epha4	13838	protein_coding
ENSMUSG00000101849	6.05761	0.448564	1.01993	0.439799	0.660082		0.0157926	0.191486	1	havana	77515280	77517128	ENSMUSG00000101849	Gm28386		lincRNA
ENSMUSG00000032908	12.1834	1.09908	0.669815	1.64087	0.100825	0.327668	0.0942149	0.218504	1	ensembl_havana	78310345	78420289	ENSMUSG00000032908	Sgpp2	433323	protein_coding
ENSMUSG00000026245	7447.95	0.149287	0.120408	1.23984	0.215033	0.498975	0.112855	0.108391	1	ensembl_havana	78417975	78488897	ENSMUSG00000026245	Farsb	23874	protein_coding
ENSMUSG00000104018	9.72574	-0.520069	0.633718	-0.820662	0.411839	0.69423	-0.0455169	0.192594	1	havana	78465448	78466926	ENSMUSG00000104018	4833412K13Rik		TEC
ENSMUSG00000090486	2.85852	-1.81182	1.52554	-1.18766	0.234968		-0.0280314	0.195582	1	ensembl_havana	78497026	78512158	ENSMUSG00000090486	BC035947		protein_coding
ENSMUSG00000099364	3.38256	0.0765144	1.09628	0.0697946	0.944357		0.00240548	0.191005	1	havana	78595031	78609508	ENSMUSG00000099364	5730419F03Rik		lincRNA
ENSMUSG00000032883	3083.79	0.307646	0.0990237	3.10679	0.00189132	0.0202523	0.272141	0.0989737	1	ensembl_havana	78657825	78707743	ENSMUSG00000032883	Acsl3	74205	protein_coding
ENSMUSG00000079470	902.846	-0.399295	0.136798	-2.91888	0.00351297	0.0325668	-0.331716	0.139452	1	ensembl_havana	78658038	78671512	ENSMUSG00000079470	Utp14b	195434	protein_coding
ENSMUSG00000099377	6.04804	-0.816162	0.823437	-0.991165	0.321605		-0.0439	0.1958	1	havana	78783136	78784859	ENSMUSG00000099377	Gm6159	620521	processed_pseudogene
ENSMUSG00000072978	5.44355	0.143502	0.828147	0.17328	0.862431		0.00756488	0.189056	1	havana	78967637	78968079	ENSMUSG00000072978	Gm5830		processed_pseudogene
ENSMUSG00000054702	239.424	-0.725414	0.208511	-3.47902	0.000503242	0.00742013	-0.606086	0.223582	1	ensembl_havana	79606876	79671972	ENSMUSG00000054702	Ap1s3	252903	protein_coding
ENSMUSG00000073643	1020.07	-0.0435455	0.142044	-0.306563	0.759176	0.905059	-0.0283112	0.115222	1	ensembl_havana	79702262	79776143	ENSMUSG00000073643	Wdfy1	69368	protein_coding
ENSMUSG00000026248	1287.36	-0.197926	0.0962179	-2.05706	0.0396808	0.180666	-0.167765	0.0925272	1	ensembl_havana	79776018	79781445	ENSMUSG00000026248	Mrpl44	69163	protein_coding
ENSMUSG00000026249	1122.75	0.200419	0.134473	1.4904	0.136118	0.385896	0.145926	0.122284	1	ensembl_havana	79794197	79861180	ENSMUSG00000026249	Serpine2	20720	protein_coding
ENSMUSG00000067106	12.7127	0.631111	0.550827	1.14575	0.251898	0.542265	0.0745993	0.201374	1	ensembl_havana	79922536	79923426	ENSMUSG00000067106	Gm5529		processed_pseudogene
ENSMUSG00000043230	4.42813	1.01356	1.0756	0.942316	0.346031		0.03259	0.194861	1	ensembl_havana	80198706	80218473	ENSMUSG00000043230	Fam124b	241128	protein_coding
ENSMUSG00000004364	8180.12	-0.0136723	0.106579	-0.128283	0.897925	0.964436	-0.0106558	0.0934537	1	ensembl_havana	80264923	80340480	ENSMUSG00000004364	Cul3	26554	protein_coding
ENSMUSG00000103076	10.8784	-0.344749	0.586031	-0.588278	0.556346	0.795898	-0.0343317	0.188097	1	havana	80274731	80276413	ENSMUSG00000103076	Gm37902		TEC
ENSMUSG00000103525	3.05192	-0.625674	1.16012	-0.539321	0.589666		-0.0169655	0.192405	1	havana	80326177	80327994	ENSMUSG00000103525	Gm37262		TEC
ENSMUSG00000090637	36.5923	0.597248	0.523798	1.14023	0.254192	0.544354	0.0769355	0.201476	1	havana	80383104	80385185	ENSMUSG00000090637	Gm6189	620899	processed_pseudogene
ENSMUSG00000038608	20.3623	0.244208	0.628369	0.388638	0.697544	0.877052	0.0214958	0.186929	1	ensembl_havana	80501073	80758527	ENSMUSG00000038608	Dock10	210293	protein_coding
ENSMUSG00000055980	48.7168	-1.22593	0.335142	-3.65795	0.000254244	0.00433401	-1.02057	0.368057	1	ensembl_havana	82233101	82291416	ENSMUSG00000055980	Irs1	16367	protein_coding
ENSMUSG00000026142	402.88	0.234315	0.224214	1.04505	0.295998	0.586855	0.109232	0.165437	1	ensembl_havana	82316452	82445366	ENSMUSG00000026142	Rhbdd1	76867	protein_coding
ENSMUSG00000104493	2.11012	0.888852	1.33509	0.665763	0.505563		0.0186891	0.193234	1	havana	82352217	82355049	ENSMUSG00000104493	Gm19552		TEC
ENSMUSG00000100786	9.38601	0.0611219	0.664829	0.0919363	0.926749	0.973607	0.00493609	0.18626	1	havana	82392493	82402746	ENSMUSG00000100786	Gm28940		antisense
ENSMUSG00000026150	2306.49	-0.150312	0.0915146	-1.64249	0.100489	0.327146	-0.126797	0.0865172	1	ensembl_havana	82724890	82752394	ENSMUSG00000026150	Mff	75734	protein_coding
ENSMUSG00000101450	21.8714	0.115442	0.44223	0.261045	0.794057	0.919615	0.0188641	0.178663	1	havana	82739691	82740707	ENSMUSG00000101450	Gm28941		sense_intronic
ENSMUSG00000026159	6121.99	0.0491221	0.089582	0.548347	0.583453	0.813031	0.0407385	0.081785	1	ensembl_havana	82839483	82901182	ENSMUSG00000026159	Agfg1	15463	protein_coding
ENSMUSG00000113880	3.86331	0.403944	1.18779	0.340081	0.733795		0.010602	0.191851	1	havana	82913325	82914130	ENSMUSG00000113880	A030005L19Rik		protein_coding
ENSMUSG00000038496	57.0574	0.261829	0.498187	0.525563	0.599192	0.822008	0.0351917	0.184666	1	ensembl_havana	83012523	83038448	ENSMUSG00000038496	Slc19a3	80721	protein_coding
ENSMUSG00000026166	7.64805	-2.94476	1.0371	-2.83941	0.00451973		-0.11352	0.243828	1	ensembl_havana	83116766	83119167	ENSMUSG00000026166	Ccl20	20297	protein_coding
ENSMUSG00000026163	9.88804	-0.451524	0.629615	-0.717144	0.473285	0.740974	-0.0397182	0.190775	1	ensembl_havana	83254139	83408200	ENSMUSG00000026163	Sphkap	77629	protein_coding
ENSMUSG00000100580	1.65299	1.82887	1.82639	1.00136	0.316652		0.0209033	0.194569	1	havana	83659550	83911644	ENSMUSG00000100580	4933436I20Rik		lincRNA
ENSMUSG00000045658	547.311	0.105126	0.21807	0.482077	0.629751	0.838838	0.0474064	0.148531	1	ensembl_havana	84036296	84364180	ENSMUSG00000045658	Pid1	98496	protein_coding
ENSMUSG00000036766	45.4467	0.526573	0.352578	1.4935	0.135307	0.384486	0.148243	0.22764	1	ensembl_havana	84369839	84696221	ENSMUSG00000036766	Dner	227325	protein_coding
ENSMUSG00000026219	32937.9	-0.0561455	0.0925171	-0.606866	0.54394	0.78947	-0.0514687	0.0843295	1	ensembl_havana	84721189	84840516	ENSMUSG00000026219	Trip12	14897	protein_coding
ENSMUSG00000104503	22.9862	-0.747704	0.420454	-1.77833	0.0753503	0.274062	-0.169951	0.265528	1	havana	84819968	84824683	ENSMUSG00000104503	Gm37738		TEC
ENSMUSG00000073633	126.927	0.180536	0.281516	0.641299	0.521328	0.776524	0.0604098	0.167535	1	ensembl_havana	84839841	84900487	ENSMUSG00000073633	Fbxo36	66153	protein_coding
ENSMUSG00000026220	25.672	0.523108	0.444794	1.17607	0.239568	0.527756	0.0916073	0.203429	1	ensembl_havana	84905898	84935134	ENSMUSG00000026220	Slc16a14	71781	protein_coding
ENSMUSG00000052477	2.67434	-0.299108	1.16924	-0.255814	0.798095		-0.00794835	0.191593	1	ensembl_havana	84992690	85270566	ENSMUSG00000052477	C130026I21Rik	620078	protein_coding
ENSMUSG00000064281	11.3739	-0.576017	0.630908	-0.912997	0.361244	0.649431	-0.0511553	0.194423	1	ensembl_havana	85012114	85012704	ENSMUSG00000064281	Rpl19-ps1	100039695	processed_pseudogene
ENSMUSG00000072109	6.89529	0.288333	0.942786	0.305831	0.759734		0.0119016	0.190487	1	ensembl_havana	85105946	85114035	ENSMUSG00000072109	A530040E14Rik	621875	antisense
ENSMUSG00000089716	6.95111	0.14581	0.968977	0.150478	0.880387		0.00576584	0.190295	1	havana	85159764	85194260	ENSMUSG00000089716	Gm6264		transcribed_unprocessed_pseudogene
ENSMUSG00000079455	4.3429	1.26009	1.22082	1.03216	0.301995		0.0313133	0.195351	1	havana	85266698	85285491	ENSMUSG00000079455	Gm16026		transcribed_unprocessed_pseudogene
ENSMUSG00000101751	2.1285	-0.105304	1.30754	-0.0805361	0.935811		-0.00222753	0.191881	1	havana	85501090	85514604	ENSMUSG00000101751	Gm2427		unprocessed_pseudogene
ENSMUSG00000089714	32.9634	0.200973	0.349582	0.574895	0.565362	0.801735	0.0486647	0.175719	1	havana	85511133	85527161	ENSMUSG00000089714	Gm16092		lincRNA
ENSMUSG00000070034	9.12275	0.224655	0.86753	0.25896	0.795666	0.919987	0.0108904	0.189701	1	ensembl_havana	85576899	85598817	ENSMUSG00000070034	Sp110	109032	protein_coding
ENSMUSG00000070031	11.5953	-0.685211	0.673709	-1.01707	0.309119	0.600241	-0.0542174	0.196738	1	ensembl_havana	85600378	85645037	ENSMUSG00000070031	Sp140	434484	protein_coding
ENSMUSG00000090246	4.84276	0.47642	0.862099	0.552628	0.580518		0.0233402	0.191162	1	havana	85641222	85650585	ENSMUSG00000090246	Gm17017		antisense
ENSMUSG00000052760	33.8531	-0.184906	0.535093	-0.345559	0.729674	0.893983	-0.0214399	0.183824	1	ensembl_havana	85717083	85778643	ENSMUSG00000052760	A630001G21Rik	319997	protein_coding
ENSMUSG00000036707	4273.02	-0.0992175	0.0767908	-1.29205	0.19634	0.474482	-0.0866963	0.0726714	1	ensembl_havana	85793441	85851576	ENSMUSG00000036707	Cab39	12283	protein_coding
ENSMUSG00000026223	753.965	0.00551906	0.110355	0.0500119	0.960113	0.985546	0.00417704	0.0959318	1	ensembl_havana	85894281	85908675	ENSMUSG00000026223	Itm2c	64294	protein_coding
ENSMUSG00000049608	1.60484	0.253224	1.46677	0.172641	0.862934		0.00440602	0.192352	1	ensembl_havana	85938318	85961007	ENSMUSG00000049608	Gpr55	227326	protein_coding
ENSMUSG00000099342	86.9452	0.0834897	0.283251	0.294756	0.76818	0.908648	0.0270064	0.161635	1	havana	86014403	86015886	ENSMUSG00000099342	Gm18180	100416669	processed_pseudogene
ENSMUSG00000026227	17.3673	0.843464	0.610065	1.38258	0.166794	0.432607	0.0840259	0.209566	1	ensembl_havana	86045863	86055456	ENSMUSG00000026227	2810459M11Rik	72792	protein_coding
ENSMUSG00000026229	15318.2	0.206921	0.141246	1.46497	0.14293	0.395767	0.146989	0.127469	1	ensembl_havana	86064387	86139151	ENSMUSG00000026229	Psmd1	70247	protein_coding
ENSMUSG00000077274	2.70371	-0.647476	1.20244	-0.538468	0.590254		-0.0163885	0.192511	1	ensembl	86087301	86087422	ENSMUSG00000077274	Gm22786	115485822	snoRNA
ENSMUSG00000103272	12.3373	-0.323157	0.633083	-0.510449	0.609737	0.827337	-0.0278272	0.188116	1	havana	86120883	86123561	ENSMUSG00000103272	Gm37914		TEC
ENSMUSG00000062590	533.888	0.0493036	0.14094	0.349821	0.726473	0.892216	0.0325467	0.114823	1	ensembl_havana	86154780	86278284	ENSMUSG00000062590	Armc9	78795	protein_coding
ENSMUSG00000079445	2651.34	-0.00502164	0.130379	-0.0385156	0.969277	0.98896	-0.00336947	0.108213	1	ensembl_havana	86302832	86307305	ENSMUSG00000079445	B3gnt7	227327	protein_coding
ENSMUSG00000026234	140913	-0.0898371	0.082109	-1.09412	0.273902	0.563647	-0.0788537	0.0768876	1	ensembl_havana	86344719	86359400	ENSMUSG00000026234	Ncl	17975	protein_coding
ENSMUSG00000064823	3.70568	-0.591032	1.07751	-0.548518	0.583336		-0.0184794	0.192185	1	ensembl	86356261	86356330	ENSMUSG00000064823	Snord82	80828	snoRNA
ENSMUSG00000073627	83.1187	-0.599042	0.269246	-2.22489	0.0260887	0.139007	-0.341836	0.294793	1	ensembl_havana	86359574	86373791	ENSMUSG00000073627	C130036L24Rik		processed_transcript
ENSMUSG00000026237	2.60117	-0.371161	1.26125	-0.29428	0.768544		-0.00856989	0.191982	1	ensembl_havana	86386303	86426228	ENSMUSG00000026237	Nmur1	14767	protein_coding
ENSMUSG00000101328	1.8159	-0.0754976	1.52701	-0.0494416	0.960567		-0.00116265	0.192424	1	havana	86473659	86474006	ENSMUSG00000101328	Rpl30-ps6		processed_pseudogene
ENSMUSG00000026238	69510.7	-0.120731	0.078138	-1.5451	0.122322	0.364781	-0.104818	0.0743187	1	ensembl_havana	86526726	86530712	ENSMUSG00000026238	Ptma	19231	protein_coding
ENSMUSG00000026239	493.361	0.194783	0.14887	1.30841	0.190736	0.466333	0.131857	0.130632	1	ensembl_havana	86542994	86582629	ENSMUSG00000026239	Pde6d	18582	protein_coding
ENSMUSG00000026240	1517.92	0.0378405	0.0904771	0.418233	0.675777	0.864747	0.0310826	0.0822679	1	ensembl_havana	86582904	86609375	ENSMUSG00000026240	Cops7b	26895	protein_coding
ENSMUSG00000026241	8.17682	0.988805	0.968584	1.02088	0.307313	0.598499	0.0386863	0.195854	1	ensembl_havana	86666291	86670571	ENSMUSG00000026241	Nppc	18159	protein_coding
ENSMUSG00000053333	578.504	-0.219639	0.179512	-1.22354	0.221126	0.506211	-0.12889	0.149201	1	ensembl_havana	86703808	87050095	ENSMUSG00000053333	Dis3l2	208718	protein_coding
ENSMUSG00000100768	2.73082	0.568777	1.19796	0.474788	0.634938		0.0147146	0.192262	1	havana	86774819	86776528	ENSMUSG00000100768	Gm29055		sense_intronic
ENSMUSG00000084106	334.294	0.00893245	0.152209	0.0586855	0.953203	0.98348	0.006385	0.119734	1	havana	86908793	86909683	ENSMUSG00000084106	Gm6136	620213	processed_pseudogene
ENSMUSG00000099401	2.05937	3.24848	1.81768	1.78716	0.0739124		0.0366276	0.198141	1	havana	86929387	87057596	ENSMUSG00000099401	Gm28375		antisense
ENSMUSG00000103984	2.0793	-1.30421	1.38546	-0.941351	0.346525		-0.0253359	0.194536	1	havana	87036723	87039650	ENSMUSG00000103984	Gm37447		TEC
ENSMUSG00000101940	5.66665	0.853523	0.834493	1.0228	0.3064		0.0454718	0.196348	1	havana	87067672	87071098	ENSMUSG00000101940	Akp-ps1	208256	transcribed_unprocessed_pseudogene
ENSMUSG00000026246	16.9115	1.58253	0.912307	1.73465	0.0828026	0.291318	0.0693863	0.208539	1	ensembl_havana	87086694	87089928	ENSMUSG00000026246	Alppl2	11650	protein_coding
ENSMUSG00000026247	24.2271	0.293927	0.40771	0.72092	0.470959	0.739988	0.0563363	0.184206	1	ensembl_havana	87147655	87156521	ENSMUSG00000026247	Ecel1	13599	protein_coding
ENSMUSG00000036480	14.7802	0.729832	0.536703	1.35984	0.173879	0.442829	0.0932085	0.21141	1	ensembl_havana	87183313	87188405	ENSMUSG00000036480	Prss56	69453	protein_coding
ENSMUSG00000026251	3.85548	-0.1067	1.61695	-0.0659885	0.947387		-0.00144113	0.192587	1	ensembl_havana	87190607	87200070	ENSMUSG00000026251	Chrnd	11447	protein_coding
ENSMUSG00000026253	3.94387	-0.635719	1.16216	-0.547015	0.584369		-0.0170842	0.192453	1	ensembl_havana	87204657	87212694	ENSMUSG00000026253	Chrng	11449	protein_coding
ENSMUSG00000026254	5466.49	0.08502	0.128559	0.661331	0.5084	0.767093	0.0601013	0.109408	1	ensembl_havana	87213914	87240488	ENSMUSG00000026254	Eif4e2	26987	protein_coding
ENSMUSG00000026255	147.663	0.583115	0.196288	2.97071	0.00297117	0.0284897	0.460045	0.209954	1	ensembl_havana	87264363	87310839	ENSMUSG00000026255	Efhd1	98363	protein_coding
ENSMUSG00000048000	5114.74	0.0653094	0.0770643	0.847467	0.396735	0.681866	0.0568482	0.0722114	1	ensembl_havana	87326998	87450796	ENSMUSG00000048000	Gigyf2	227331	protein_coding
ENSMUSG00000026258	2.40778	-1.74349	1.67062	-1.04362	0.29666		-0.0228103	0.194792	1	ensembl_havana	87470271	87475482	ENSMUSG00000026258	Snorc	73234	protein_coding
ENSMUSG00000026259	40.7946	1.08596	0.546434	1.98736	0.0468823	0.201395	0.15107	0.266769	1	ensembl_havana	87476834	87573870	ENSMUSG00000026259	Ngef	53972	protein_coding
ENSMUSG00000090994	4.01336	0.237829	1.00132	0.237515	0.812257		0.0087331	0.190687	1	havana	87543635	87544692	ENSMUSG00000090994	Gm6153	620454	processed_pseudogene
ENSMUSG00000026288	5861.1	0.274897	0.144859	1.89768	0.0577378	0.231045	0.202263	0.137723	1	ensembl_havana	87620312	87720507	ENSMUSG00000026288	Inpp5d	16331	protein_coding
ENSMUSG00000026289	2119	-0.0409179	0.117711	-0.347613	0.728131	0.892976	-0.0300046	0.101111	1	ensembl_havana	87755870	87792428	ENSMUSG00000026289	Atg16l1	77040	protein_coding
ENSMUSG00000087968	6.11715	-0.460247	0.892919	-0.515441	0.606245		-0.0206523	0.191132	1	ensembl	87776938	87777209	ENSMUSG00000087968	Gm25395	115485773	scaRNA
ENSMUSG00000089281	9.4683	-0.608333	0.662475	-0.918274	0.358475	0.646482	-0.0492158	0.194608	1	ensembl	87784556	87784820	ENSMUSG00000089281	Scarna6	100217415	scaRNA
ENSMUSG00000056055	9.25148	-0.586363	0.650371	-0.901582	0.367279	0.655547	-0.0491503	0.19425	1	ensembl_havana	87803680	87845158	ENSMUSG00000056055	Sag	20215	protein_coding
ENSMUSG00000070738	3655.21	0.0146265	0.0869158	0.168283	0.86636	0.949768	0.012139	0.0793495	1	ensembl_havana	87853287	87945180	ENSMUSG00000070738	Dgkd	227333	protein_coding
ENSMUSG00000005501	564.524	-0.0631919	0.119221	-0.53004	0.596084	0.82032	-0.045708	0.102686	1	ensembl_havana	87945119	88008551	ENSMUSG00000005501	Usp40	227334	protein_coding
ENSMUSG00000081984	19.7958	-0.129934	0.449176	-0.289271	0.772374	0.910455	-0.0203474	0.179339	1	ensembl_havana	88204732	88205782	ENSMUSG00000081984	Dnajb3	15504	protein_coding
ENSMUSG00000044783	5992.89	-0.046847	0.0906684	-0.516685	0.605376	0.825438	-0.0385544	0.0825631	1	ensembl_havana	88262471	88277633	ENSMUSG00000044783	Hjurp		protein_coding
ENSMUSG00000100908	6.76656	0.704326	0.844779	0.833739	0.404428		0.036015	0.193747	1	havana	88459683	88465558	ENSMUSG00000100908	Gm28888		lincRNA
ENSMUSG00000100798	2.18805	-1.002	1.44016	-0.695755	0.486582		-0.0178767	0.193469	1	havana	88551517	88562167	ENSMUSG00000100798	Gm19589	100503197	lincRNA
ENSMUSG00000049866	573.262	-0.912597	0.268039	-3.40471	0.000662334	0.00920181	-0.741066	0.295515	1	ensembl_havana	88673125	88702221	ENSMUSG00000049866	Arl4c	320982	protein_coding
ENSMUSG00000097398	132.365	1.21191	0.849956	1.42585	0.153913	0.413878	0.0602995	0.203217	1	havana	88754890	88755736	ENSMUSG00000097398	Platr5	78650	lincRNA
ENSMUSG00000036206	1218.51	0.488754	0.118467	4.12565	3.69695e-05	0.000950969	0.443081	0.121292	1	ensembl_havana	89070415	89155068	ENSMUSG00000036206	Sh3bp4	98402	protein_coding
ENSMUSG00000055013	1083.19	0.0260591	0.0902144	0.288857	0.772691	0.910598	0.0215186	0.0819321	1	ensembl_havana	89454806	89897617	ENSMUSG00000055013	Agap1	347722	protein_coding
ENSMUSG00000034486	765.13	0.16079	0.187533	0.857395	0.391227	0.677324	0.0878131	0.144259	1	ensembl_havana	89927956	89931179	ENSMUSG00000034486	Gbx2	14472	protein_coding
ENSMUSG00000092627	105.515	0.488009	0.222679	2.19153	0.0284134	0.147194	0.309149	0.230639	1	havana	89930234	89933290	ENSMUSG00000092627	D130058E05Rik		processed_transcript
ENSMUSG00000067081	2.36667	-0.304548	1.25892	-0.241911	0.808849		-0.00698787	0.191899	1	ensembl_havana	89950220	90014666	ENSMUSG00000067081	Asb18	208372	protein_coding
ENSMUSG00000026301	36.6798	3.32172	0.885937	3.74938	0.00017727	0.00333264	2.76047	0.999084	1	ensembl_havana	90042132	90153401	ENSMUSG00000026301	Iqca	74918	protein_coding
ENSMUSG00000044337	93.5311	-0.399947	0.246802	-1.62052	0.105121	0.335682	-0.191225	0.210438	1	ensembl_havana	90203980	90216751	ENSMUSG00000044337	Ackr3	12778	protein_coding
ENSMUSG00000103292	4.17189	-0.176758	1.10219	-0.16037	0.87259		-0.00522383	0.191137	1	havana	90520496	90523297	ENSMUSG00000103292	Gm35048		TEC
ENSMUSG00000034432	2337.67	-0.0758597	0.090141	-0.841567	0.40003	0.684565	-0.0629358	0.0828189	1	ensembl_havana	90602981	90613341	ENSMUSG00000034432	Cops8	108679	protein_coding
ENSMUSG00000048126	9.48046	1.71549	0.840771	2.04038	0.0413127	0.185637	0.0959099	0.224476	1	ensembl_havana	90765923	90843971	ENSMUSG00000048126	Col6a3	12835	protein_coding
ENSMUSG00000026303	6.96234	0.451465	0.94912	0.475666	0.634312		0.0182818	0.191276	1	ensembl_havana	90915085	90951142	ENSMUSG00000026303	Mlph	171531	protein_coding
ENSMUSG00000026304	18.4902	-0.852662	0.542751	-1.571	0.116182	0.355401	-0.109572	0.223904	1	ensembl_havana	90958133	90969661	ENSMUSG00000026304	Rab17	19329	protein_coding
ENSMUSG00000026305	848.398	-0.315524	0.161426	-1.95461	0.0506292	0.211885	-0.2221	0.154882	1	ensembl_havana	90998737	91128944	ENSMUSG00000026305	Lrrfip1	16978	protein_coding
ENSMUSG00000070732	272.808	0.966629	0.344477	2.80608	0.00501484	0.0427218	0.660463	0.42275	1	ensembl_havana	91145089	91170795	ENSMUSG00000070732	Rbm44	329207	protein_coding
ENSMUSG00000034343	1516.94	-0.0247039	0.0917255	-0.269324	0.78768	0.917794	-0.0201356	0.0830369	1	ensembl_havana	91250304	91290337	ENSMUSG00000034343	Ube2f	67921	protein_coding
ENSMUSG00000083064	117.736	0.395128	0.2131	1.85419	0.0637118	0.246037	0.232858	0.201869	1	havana	91296045	91296936	ENSMUSG00000083064	Gm7785		processed_pseudogene
ENSMUSG00000026307	506.594	-0.175323	0.167343	-1.04769	0.294783	0.585443	-0.106364	0.137641	1	ensembl_havana	91298338	91321075	ENSMUSG00000026307	Scly	50880	protein_coding
ENSMUSG00000049515	11.3067	-0.1248	0.616193	-0.202534	0.839499	0.939013	-0.0111533	0.185424	1	ensembl_havana	91322075	91348306	ENSMUSG00000049515	Espnl	227357	protein_coding
ENSMUSG00000026308	6.95508	0.775275	0.794421	0.975899	0.329114		0.0451267	0.195721	1	ensembl_havana	91351016	91362416	ENSMUSG00000026308	Klhl30	70788	protein_coding
ENSMUSG00000047443	96.3428	-0.232387	0.335397	-0.692871	0.48839	0.752782	-0.060178	0.177037	1	ensembl_havana	91366430	91374217	ENSMUSG00000047443	Erfe	227358	protein_coding
ENSMUSG00000026309	1646.24	-0.105782	0.0879522	-1.20273	0.229082	0.51482	-0.0891524	0.0819977	1	ensembl_havana	91373861	91398815	ENSMUSG00000026309	Ilkap	67444	protein_coding
ENSMUSG00000067071	314.404	-0.486823	0.16442	-2.96085	0.0030679	0.0291941	-0.39535	0.171617	1	ensembl_havana	91411483	91414038	ENSMUSG00000067071	Hes6	55927	protein_coding
ENSMUSG00000055866	40.9628	-0.66237	0.465558	-1.42274	0.154811	0.414876	-0.110122	0.217957	1	ensembl_havana	91415982	91459324	ENSMUSG00000055866	Per2	18627	protein_coding
ENSMUSG00000034292	698.237	-0.23805	0.127784	-1.8629	0.0624757	0.243098	-0.182924	0.121007	1	ensembl_havana	91494647	91529307	ENSMUSG00000034292	Traf3ip1	74019	protein_coding
ENSMUSG00000026311	775.247	-0.0959285	0.113138	-0.847887	0.396501	0.681761	-0.0725167	0.100146	1	ensembl_havana	91540544	91559589	ENSMUSG00000026311	Asb1	65247	protein_coding
ENSMUSG00000007805	1.73184	-2.36921	1.80901	-1.30967	0.190306		-0.0277148	0.195867	1	ensembl_havana	91801461	91848028	ENSMUSG00000007805	Twist2	13345	protein_coding
ENSMUSG00000026313	1038.29	-0.185894	0.0995753	-1.86687	0.0619201	0.241647	-0.154821	0.0947991	1	ensembl_havana	91928779	92195699	ENSMUSG00000026313	Hdac4	208727	protein_coding
ENSMUSG00000101522	2.02422	-0.302499	1.34883	-0.224268	0.822549		-0.00606783	0.192139	1	havana	92430121	92430532	ENSMUSG00000101522	Gm7837		processed_pseudogene
ENSMUSG00000026260	4127.35	0.186603	0.120137	1.55326	0.120362	0.36176	0.143558	0.110992	1	ensembl_havana	92439010	92473860	ENSMUSG00000026260	Ndufa10	67273	protein_coding
ENSMUSG00000063583	2.69049	0.495384	1.5833	0.312881	0.754371		0.00738743	0.192742	1	ensembl_havana	92605782	92614806	ENSMUSG00000063583	Olfr1410	258484	protein_coding
ENSMUSG00000061616	1.46422	1.58055	2.04094	0.774424	0.43868		0.0141648	0.193905	1	ensembl_havana	92617788	92623412	ENSMUSG00000061616	Olfr12	257890	protein_coding
ENSMUSG00000073616	904.055	0.0565372	0.106701	0.529868	0.596203	0.820335	0.0444213	0.0942976	1	ensembl_havana	92637145	92641985	ENSMUSG00000073616	Cops9	66915	protein_coding
ENSMUSG00000034220	738.348	-0.10911	0.118974	-0.917091	0.359095	0.647043	-0.0809507	0.104737	1	ensembl_havana	92831645	92860779	ENSMUSG00000034220	Gpc1	14733	protein_coding
ENSMUSG00000034212	20.6619	0.785241	0.556329	1.41147	0.158106	0.420353	0.0936573	0.213149	1	ensembl_havana	92859803	92902906	ENSMUSG00000034212	Ankmy1	241158	protein_coding
ENSMUSG00000047067	78.2138	0.0964517	0.241209	0.399868	0.689253	0.872831	0.0385276	0.153826	1	ensembl_havana	92906981	92908435	ENSMUSG00000047067	Dusp28	67446	protein_coding
ENSMUSG00000097251	2.40875	0.246314	1.21253	0.203141	0.839024		0.00623145	0.191659	1	havana	92908378	92910764	ENSMUSG00000097251	5033417F24Rik	75995	antisense
ENSMUSG00000026269	554.133	0.30019	0.149524	2.00763	0.0446822	0.195362	0.220358	0.144063	1	ensembl_havana	92910783	92924384	ENSMUSG00000026269	Rnpepl1	108657	protein_coding
ENSMUSG00000026270	803	0.13865	0.106532	1.30149	0.193091	0.469755	0.110157	0.0977504	1	ensembl_havana	92934376	92947941	ENSMUSG00000026270	Capn10	23830	protein_coding
ENSMUSG00000026271	9.91138	-0.125959	0.692377	-0.181922	0.855644	0.945743	-0.00902574	0.187079	1	ensembl_havana	92950865	92986391	ENSMUSG00000026271	Gpr35	64095	protein_coding
ENSMUSG00000014602	253.638	-2.133	0.331923	-6.4262	1.30829e-10	1.88677e-08	-2.02528	0.340665	1	ensembl_havana	93015464	93101951	ENSMUSG00000014602	Kif1a	16560	protein_coding
ENSMUSG00000034159	5.30559	-2.30232	0.966445	-2.38225	0.0172071		-0.10514	0.233674	1	ensembl_havana	93151349	93160948	ENSMUSG00000034159	Mab21l4	71874	protein_coding
ENSMUSG00000084989	692.467	0.119511	0.191355	0.624549	0.532267	0.783044	0.0622502	0.141278	1	havana	93168725	93231072	ENSMUSG00000084989	Crocc2	381284	protein_coding
ENSMUSG00000047793	1039.23	0.556953	0.224736	2.47825	0.0132028	0.0875921	0.376877	0.243281	1	ensembl_havana	93235841	93301065	ENSMUSG00000047793	Sned1	208777	protein_coding
ENSMUSG00000026273	794.101	-0.209631	0.09798	-2.13953	0.0323928	0.159073	-0.177186	0.0945432	1	ensembl_havana	93299211	93305915	ENSMUSG00000026273	Mterf4	69821	protein_coding
ENSMUSG00000100351	6.75169	-0.450787	0.749653	-0.601327	0.547622		-0.0283715	0.190656	1	havana	93306694	93307239	ENSMUSG00000100351	Gm7867	108167665	processed_pseudogene
ENSMUSG00000026274	2353.25	-0.0262999	0.102944	-0.255478	0.798354	0.921359	-0.0204578	0.0910903	1	ensembl_havana	93308770	93343482	ENSMUSG00000026274	Pask	269224	protein_coding
ENSMUSG00000026275	3645.65	-0.0645652	0.110357	-0.585057	0.558509	0.797347	-0.0490607	0.0970025	1	ensembl_havana	93342854	93373489	ENSMUSG00000026275	Ppp1r7	66385	protein_coding
ENSMUSG00000064389	2.04435	0.250629	1.7334	0.144588	0.885036		0.00312495	0.192806	1	ensembl	93363255	93363357	ENSMUSG00000064389	Gm26446	115487609	snRNA
ENSMUSG00000034107	34.1975	-0.26451	0.399216	-0.662574	0.507604	0.766513	-0.0518412	0.182087	1	ensembl_havana	93373930	93404303	ENSMUSG00000034107	Ano7	404545	protein_coding
ENSMUSG00000034088	19721.3	0.12208	0.103055	1.18461	0.23617	0.523342	0.0972883	0.0943037	1	ensembl_havana	93405940	93478815	ENSMUSG00000034088	Hdlbp	110611	protein_coding
ENSMUSG00000090489	5.00992	-0.076179	0.920729	-0.0827377	0.93406		-0.00315596	0.189819	1	havana	93421700	93422488	ENSMUSG00000090489	Gm17415	108167670	processed_pseudogene
ENSMUSG00000026276	95.4762	-0.162385	0.257384	-0.630904	0.528103	0.780717	-0.0602986	0.162023	1	havana	93478964	93510260	ENSMUSG00000026276	Septin2	18000	protein_coding
ENSMUSG00000034066	75.4678	0.107169	0.366557	0.292366	0.770007	0.909474	0.0238241	0.172932	1	ensembl_havana	93512079	93621976	ENSMUSG00000034066	Farp2	227377	protein_coding
ENSMUSG00000026277	2033.91	0.108418	0.108532	0.99895	0.317819	0.60743	0.0841878	0.0975858	1	ensembl_havana	93619751	93658659	ENSMUSG00000026277	Stk25	59041	protein_coding
ENSMUSG00000026278	413.076	0.0301415	0.129732	0.232336	0.816277	0.929546	0.0209767	0.108116	1	ensembl_havana	93685660	93695764	ENSMUSG00000026278	Bok	51800	protein_coding
ENSMUSG00000026279	876.612	0.0888138	0.0983178	0.903334	0.366349	0.654295	0.0712357	0.0893627	1	ensembl_havana	93701935	93754864	ENSMUSG00000026279	Thap4	67026	protein_coding
ENSMUSG00000026280	1016.79	-0.325444	0.0934538	-3.48241	0.000496925	0.00736092	-0.293469	0.0937961	1	ensembl_havana	93751500	93790610	ENSMUSG00000026280	Atg4b	66615	protein_coding
ENSMUSG00000026281	4745.5	-0.233855	0.0779315	-3.00078	0.00269289	0.026593	-0.212167	0.0769614	1	ensembl_havana	93792576	93801934	ENSMUSG00000026281	Dtymk	21915	protein_coding
ENSMUSG00000026283	2865.71	-0.0553892	0.0833393	-0.664623	0.506292	0.765421	-0.046857	0.0770742	1	ensembl_havana	93803965	93822101	ENSMUSG00000026283	Ing5	66262	protein_coding
ENSMUSG00000073609	160.686	-0.482439	0.233632	-2.06495	0.0389278	0.178591	-0.282916	0.236412	1	ensembl_havana	93824909	93852348	ENSMUSG00000073609	D2hgdh	98314	protein_coding
ENSMUSG00000101660	5.57217	-0.784566	0.946208	-0.829168	0.407009		-0.031856	0.193798	1	havana	93906244	93916768	ENSMUSG00000101660	Gm18666		unprocessed_pseudogene
ENSMUSG00000093805	9.08475	-0.25411	0.709025	-0.358393	0.720049	0.888837	-0.0176519	0.18818	1	ensembl_havana	93918311	93942650	ENSMUSG00000093805	Gal3st2b	100041596	protein_coding
ENSMUSG00000099624	16.7156	-0.918312	0.530872	-1.72982	0.0836627	0.293024	-0.127823	0.238778	1	havana	93975353	93985816	ENSMUSG00000099624	Gm7889		unprocessed_pseudogene
ENSMUSG00000073608	14.866	-0.71741	0.520732	-1.37769	0.168298	0.434779	-0.0966537	0.212785	1	ensembl_havana	93990509	94017147	ENSMUSG00000073608	Gal3st2c	619597	protein_coding
ENSMUSG00000026285	2.6243	1.35428	2.07305	0.653277	0.513578		0.0114582	0.193714	1	ensembl_havana	94038305	94052553	ENSMUSG00000026285	Pdcd1	18566	protein_coding
ENSMUSG00000100347	15.7108	-0.0185077	0.544093	-0.0340158	0.972865	0.990271	-0.00194321	0.182718	1	havana	94468715	94469887	ENSMUSG00000100347	Gm7895	666025	processed_pseudogene
ENSMUSG00000051185	141.136	-0.130339	0.203564	-0.640285	0.521987	0.777019	-0.063519	0.1462	1	ensembl_havana	95313623	95335284	ENSMUSG00000051185	Fam174a	67698	protein_coding
ENSMUSG00000103973	3.27956	-0.0240178	1.0573	-0.0227162	0.981877		-0.000713747	0.190779	1	havana	95328681	95331218	ENSMUSG00000103973	BC055308		TEC
ENSMUSG00000081051	343.673	0.61096	0.165955	3.68147	0.000231893	0.00405354	0.52937	0.173875	1	havana	95498621	95499151	ENSMUSG00000081051	Gm15427	100041686	processed_pseudogene
ENSMUSG00000040710	11.5705	-0.320045	0.700505	-0.456878	0.647759	0.849085	-0.022807	0.188756	1	ensembl_havana	95587682	95667571	ENSMUSG00000040710	St8sia4	20452	protein_coding
ENSMUSG00000095955	2.11835	0.38301	1.32911	0.28817	0.773217		0.00806264	0.192167	1	ensembl	95832129	95832235	ENSMUSG00000095955	Gm22360		snRNA
ENSMUSG00000040693	654.926	0.522786	0.129117	4.04893	5.14525e-05	0.00122623	0.470033	0.132857	1	ensembl_havana	96816270	96872171	ENSMUSG00000040693	Slco4c1	227394	protein_coding
ENSMUSG00000097814	409.447	0.399426	0.169665	2.35421	0.0185624	0.111197	0.295002	0.171957	1	havana	96871126	96907796	ENSMUSG00000097814	Panct2	329217	antisense
ENSMUSG00000044757	28.8452	-0.105501	0.414042	-0.254808	0.798872	0.92152	-0.0188967	0.176688	1	ensembl_havana	97024681	97025928	ENSMUSG00000044757	Gm6430		processed_pseudogene
ENSMUSG00000044768	251.761	0.236125	0.19629	1.20294	0.229	0.514817	0.128584	0.158321	1	ensembl_havana	97606318	97662074	ENSMUSG00000044768	D1Ertd622e	52392	protein_coding
ENSMUSG00000040648	5147.1	-0.11253	0.0969809	-1.16033	0.245914	0.535626	-0.0923993	0.0893297	1	ensembl_havana	97706048	97770411	ENSMUSG00000040648	Ppip5k2	227399	protein_coding
ENSMUSG00000026333	519.703	-0.289698	0.12442	-2.3284	0.0198911	0.116746	-0.233797	0.122154	1	ensembl_havana	97770172	97793709	ENSMUSG00000026333	Gin1	252876	protein_coding
ENSMUSG00000026335	265.383	0.232107	0.21313	1.08904	0.276137	0.565403	0.11476	0.162508	1	ensembl_havana	97795114	98095646	ENSMUSG00000026335	Pam	18484	protein_coding
ENSMUSG00000089782	130.696	-0.233159	0.209064	-1.11525	0.264743	0.55463	-0.11746	0.16146	1	havana	97948901	97949389	ENSMUSG00000089782	Gm3531		processed_pseudogene
ENSMUSG00000089706	3.79915	-1.12333	1.02011	-1.10119	0.270814		-0.0399611	0.196512	1	havana	98031116	98057680	ENSMUSG00000089706	B230216N24Rik	78603	processed_transcript
ENSMUSG00000099634	1.71241	1.09318	1.55332	0.703771	0.481576		0.0171538	0.193563	1	havana	98267151	98267438	ENSMUSG00000099634	Gm29462		processed_pseudogene
ENSMUSG00000089791	67.2649	-0.114394	0.289623	-0.394975	0.692861	0.874821	-0.0356547	0.163975	1	havana	98457768	98459162	ENSMUSG00000089791	Gm3555		processed_pseudogene
ENSMUSG00000100009	4.58065	1.07683	0.983463	1.09494	0.273542		0.0416717	0.196702	1	havana	98589517	98607384	ENSMUSG00000100009	Gm7967		lincRNA
ENSMUSG00000082431	200.984	0.158721	0.165382	0.959724	0.337194	0.62665	0.0965288	0.134851	1	havana	99790429	99791025	ENSMUSG00000082431	Prdx2-ps1		processed_pseudogene
ENSMUSG00000099835	12.1667	-0.0810698	0.607973	-0.133344	0.893921	0.962904	-0.00736533	0.184964	1	havana	100282329	100282643	ENSMUSG00000099835	Gm29668		processed_pseudogene
ENSMUSG00000100794	2.14473	1.54488	1.63443	0.94521	0.344552		0.0216698	0.194448	1	havana	100282791	100283280	ENSMUSG00000100794	Gm29667		processed_pseudogene
ENSMUSG00000099375	2.27408	-0.379627	1.39947	-0.271264	0.786188		-0.00714753	0.192319	1	havana	101892958	101895091	ENSMUSG00000099375	Gm28187		lincRNA
ENSMUSG00000050840	2.06817	1.42957	1.52365	0.938248	0.348117		0.0232389	0.194465	1	ensembl_havana	104768529	104995481	ENSMUSG00000050840	Cdh20	23836	protein_coding
ENSMUSG00000047496	57.7429	0.00535116	0.28562	0.0187353	0.985052	0.994245	0.00180332	0.160487	1	ensembl_havana	105276914	105356710	ENSMUSG00000047496	Rnf152	320311	protein_coding
ENSMUSG00000101214	4.19241	1.49949	1.16803	1.28378	0.199217		0.0412448	0.197835	1	havana	105382260	105569139	ENSMUSG00000101214	Gm28403		sense_overlapping
ENSMUSG00000067017	2130.88	0.0684336	0.101134	0.676661	0.498621	0.760781	0.0542374	0.090755	1	ensembl	105455971	105458829	ENSMUSG00000067017	Capza1-ps1		pseudogene
ENSMUSG00000056536	900.498	-0.0422087	0.0988427	-0.427029	0.669359	0.860589	-0.033526	0.0884725	1	ensembl_havana	105518422	105663677	ENSMUSG00000056536	Pign	27392	protein_coding
ENSMUSG00000026319	1652.9	-0.146368	0.12581	-1.16341	0.244663	0.533712	-0.107073	0.111698	1	ensembl_havana	105663861	105755191	ENSMUSG00000026319	Relch	227446	protein_coding
ENSMUSG00000101330	2.42503	-0.690927	1.30271	-0.530376	0.595851		-0.0148604	0.19271	1	havana	105764444	105764674	ENSMUSG00000101330	Gm10193		processed_pseudogene
ENSMUSG00000026321	23.936	0.546156	0.44198	1.2357	0.216569	0.500781	0.0979087	0.206822	1	ensembl_havana	105780718	105847981	ENSMUSG00000026321	Tnfrsf11a	21934	protein_coding
ENSMUSG00000099843	13.7358	0.415117	0.555715	0.746996	0.455066	0.727724	0.0464934	0.190202	1	havana	105979350	105990282	ENSMUSG00000099843	Gm7160	635504	lincRNA
ENSMUSG00000038866	1468.26	0.120905	0.0986445	1.22566	0.220327	0.504918	0.0984538	0.0909276	1	ensembl_havana	105990406	106034074	ENSMUSG00000038866	Zcchc2	227449	protein_coding
ENSMUSG00000044340	568.948	0.100297	0.118382	0.847235	0.396864	0.681866	0.0745922	0.10387	1	ensembl_havana	106171752	106394250	ENSMUSG00000044340	Phlpp1	98432	protein_coding
ENSMUSG00000057329	32.536	-1.34314	0.394755	-3.40247	0.000667805	0.00925395	-1.06982	0.446866	1	ensembl_havana	106538178	106714274	ENSMUSG00000057329	Bcl2	12043	protein_coding
ENSMUSG00000009905	976.913	-0.279743	0.119362	-2.34366	0.0190958	0.113813	-0.228315	0.117035	1	ensembl_havana	106720459	106759727	ENSMUSG00000009905	Kdsr	70750	protein_coding
ENSMUSG00000009907	4683.78	-0.0677923	0.0916952	-0.739322	0.459711	0.731951	-0.0555682	0.0837848	1	ensembl_havana	106764071	106796728	ENSMUSG00000009907	Vps4b	20479	protein_coding
ENSMUSG00000067006	14.2031	0.336309	0.547617	0.614131	0.539129	0.786205	0.0383735	0.187604	1	ensembl_havana	106861173	106883348	ENSMUSG00000067006	Serpinb5	20724	protein_coding
ENSMUSG00000026315	3.43814	-0.217431	1.09966	-0.197725	0.84326		-0.00650813	0.19117	1	ensembl_havana	107590006	107610484	ENSMUSG00000026315	Serpinb8	20725	protein_coding
ENSMUSG00000100041	6.60076	2.00968	1.36462	1.47271	0.140831		0.037985	0.197941	1	havana	108376970	108379438	ENSMUSG00000100041	Gm5702	435640	processed_pseudogene
ENSMUSG00000026312	4.20126	-0.398835	1.0192	-0.391321	0.69556		-0.0138611	0.19127	1	ensembl_havana	109982431	110140157	ENSMUSG00000026312	Cdh7	241201	protein_coding
ENSMUSG00000047216	1.70089	1.08532	1.59022	0.682495	0.494926		0.016227	0.193522	1	ensembl_havana	110888326	110977584	ENSMUSG00000047216	Cdh19	227485	protein_coding
ENSMUSG00000038702	361.983	-0.223712	0.128578	-1.7399	0.0818769	0.289186	-0.169371	0.120311	1	ensembl_havana	111858702	111864918	ENSMUSG00000038702	Dsel	319901	protein_coding
ENSMUSG00000101875	4.68969	-0.0709105	0.913433	-0.0776308	0.938122		-0.00296409	0.189779	1	havana	111880735	111881308	ENSMUSG00000101875	Gm6028	547247	processed_pseudogene
ENSMUSG00000097648	89.3725	0.624137	0.269502	2.31589	0.0205644	0.119701	0.371748	0.301557	1	havana	113891385	113964134	ENSMUSG00000097648	9330185C12Rik		lincRNA
ENSMUSG00000026374	5926.08	-0.0766226	0.086961	-0.881115	0.378256	0.66635	-0.0642339	0.0803705	1	ensembl_havana	118294778	118311739	ENSMUSG00000026374	Tsn	22099	protein_coding
ENSMUSG00000026377	5254.32	-0.222833	0.121546	-1.83333	0.0667542	0.253265	-0.178674	0.115342	1	ensembl_havana	118321839	118333822	ENSMUSG00000026377	Nifk	67949	protein_coding
ENSMUSG00000064302	2444.25	-0.144281	0.101596	-1.42013	0.155569	0.41586	-0.117061	0.0943199	1	ensembl_havana	118389058	118612678	ENSMUSG00000064302	Clasp1	76707	protein_coding
ENSMUSG00000107722	1.69569	0.427836	1.85241	0.230961	0.817345		0.0047036	0.192991	1	ensembl_havana	118458652	118459267	ENSMUSG00000107722	2900060B14Rik	68204	antisense
ENSMUSG00000026380	10430.5	-0.126495	0.189434	-0.667752	0.504292	0.763912	-0.0646393	0.14087	1	ensembl_havana	118627945	118685168	ENSMUSG00000026380	Tfcp2l1	81879	protein_coding
ENSMUSG00000101624	3.14062	-0.491888	1.2217	-0.402626	0.687223		-0.0120662	0.19212	1	havana	118651482	118651795	ENSMUSG00000101624	Gm28882		processed_pseudogene
ENSMUSG00000048402	2099.44	-0.3306	0.16207	-2.03986	0.0413645	0.185783	-0.235607	0.157452	1	ensembl_havana	118834132	119053619	ENSMUSG00000048402	Gli2	14633	protein_coding
ENSMUSG00000097408	2.45364	-1.66203	1.35645	-1.22528	0.220471		-0.033975	0.196429	1	havana	119058469	119059848	ENSMUSG00000097408	Gm26831		lincRNA
ENSMUSG00000101179	2.45325	-0.148982	1.24503	-0.119661	0.904752		-0.00348631	0.191695	1	havana	119329200	119385581	ENSMUSG00000101179	Gm29455		lincRNA
ENSMUSG00000037035	752.629	0.507903	0.280248	1.81233	0.0699348	0.260501	0.22604	0.252797	1	ensembl_havana	119415465	119422248	ENSMUSG00000037035	Inhbb	16324	protein_coding
ENSMUSG00000004451	1329.42	0.328091	0.0985552	3.32901	0.000871564	0.0112518	0.292864	0.0989478	1	ensembl_havana	119470305	119504794	ENSMUSG00000004451	Ralb	64143	protein_coding
ENSMUSG00000098447	2.30031	-2.00914	1.45329	-1.38248	0.166825		-0.0360722	0.197258	1	havana	119520090	119526359	ENSMUSG00000098447	Gm27184		antisense
ENSMUSG00000098923	660.916	0.157556	0.129893	1.21296	0.225144	0.510916	0.114207	0.115306	1	havana	119526160	119528983	ENSMUSG00000098923	Tmem185b	226351	protein_coding
ENSMUSG00000101731	3.52953	0.192719	1.10921	0.173744	0.862067		0.00581999	0.191177	1	havana	119529480	119536165	ENSMUSG00000101731	3830432H09Rik	320069	lincRNA
ENSMUSG00000026383	994.558	-0.403031	0.129349	-3.11584	0.00183419	0.0198372	-0.343527	0.131934	1	ensembl_havana	119545037	119649000	ENSMUSG00000026383	Epb41l5	226352	protein_coding
ENSMUSG00000026384	1906.2	-0.0105	0.0981016	-0.107032	0.914764	0.969612	-0.00827964	0.0875686	1	ensembl_havana	119652467	119837613	ENSMUSG00000026384	Ptpn4	19258	protein_coding
ENSMUSG00000103146	1.66333	-0.915719	1.7576	-0.521006	0.602363		-0.0109849	0.19328	1	havana	119790763	119798925	ENSMUSG00000103146	Gm37745		TEC
ENSMUSG00000036975	475.517	0.342389	0.15529	2.20483	0.0274658	0.143556	0.255066	0.153374	1	ensembl_havana	119907890	119913208	ENSMUSG00000036975	Tmem177	66343	protein_coding
ENSMUSG00000036962	4.53008	0.30234	0.89836	0.336547	0.736459		0.0136582	0.19025	1	ensembl_havana	119923341	119997234	ENSMUSG00000036962	Cfap221	226356	protein_coding
ENSMUSG00000026387	1.70281	1.06711	1.51162	0.70594	0.480225		0.0177143	0.19354	1	ensembl_havana	120006894	120063536	ENSMUSG00000026387	Sctr	319229	protein_coding
ENSMUSG00000050777	108.234	0.809152	0.296297	2.73088	0.0063165	0.050647	0.555941	0.349171	1	ensembl_havana	120067377	120074074	ENSMUSG00000050777	Tmem37	170706	protein_coding
ENSMUSG00000026385	2553.51	0.105067	0.116835	0.899277	0.368505	0.656594	0.0793234	0.103154	1	ensembl_havana	120113280	120121078	ENSMUSG00000026385	Dbi	13167	protein_coding
ENSMUSG00000026388	170.717	-0.049822	0.183756	-0.271131	0.78629	0.91719	-0.0262053	0.134256	1	ensembl_havana	120121187	120188189	ENSMUSG00000026388	3110009E18Rik	73103	protein_coding
ENSMUSG00000026389	1024.76	0.547285	0.174915	3.12887	0.00175479	0.0191688	0.448497	0.184523	1	ensembl_havana	120190757	120272705	ENSMUSG00000026389	Steap3	68428	protein_coding
ENSMUSG00000058665	15.9312	-0.7481	0.708058	-1.05655	0.290716	0.580723	-0.0533323	0.197335	1	ensembl_havana	120602418	120607992	ENSMUSG00000058665	En1	13798	protein_coding
ENSMUSG00000097881	4.73452	1.40689	0.940705	1.49557	0.134766		0.0616861	0.204015	1	havana	121087405	121178441	ENSMUSG00000097881	Celrr	98452	lincRNA
ENSMUSG00000003721	597.164	-0.184053	0.161295	-1.1411	0.253829	0.544173	-0.115914	0.13591	1	ensembl_havana	121304353	121332589	ENSMUSG00000003721	Insig2	72999	protein_coding
ENSMUSG00000104253	7.07467	-0.58665	0.734413	-0.7988	0.424406		-0.038819	0.192886	1	havana	121328092	121331149	ENSMUSG00000104253	Gm37174		TEC
ENSMUSG00000026339	965.413	0.031861	0.117847	0.27036	0.786883	0.917284	0.023201	0.101008	1	ensembl_havana	121431049	121506460	ENSMUSG00000026339	Ccdc93	70829	protein_coding
ENSMUSG00000050534	7.69523	-0.856717	0.825365	-1.03799	0.299277		-0.0455402	0.196452	1	ensembl_havana	121509842	121528465	ENSMUSG00000050534	Htr5b	15564	protein_coding
ENSMUSG00000001674	9530.79	-0.147206	0.0907714	-1.62172	0.104863	0.335169	-0.124507	0.0857828	1	ensembl_havana	121553835	121567989	ENSMUSG00000001674	Ddx18	66942	protein_coding
ENSMUSG00000100405	9.76183	0.153635	0.714015	0.215171	0.829634	0.935591	0.0107141	0.187571	1	havana	123205149	123205265	ENSMUSG00000100405	Gm28911		processed_pseudogene
ENSMUSG00000026341	11799.6	0.046113	0.145804	0.316266	0.7518	0.902976	0.0297859	0.117283	1	ensembl_havana	125392905	125435727	ENSMUSG00000026341	Actr3	74117	protein_coding
ENSMUSG00000026342	526.667	-0.0701977	0.155815	-0.45052	0.652335	0.851172	-0.0427824	0.123167	1	ensembl_havana	125560595	125595820	ENSMUSG00000026342	Slc35f5	74150	protein_coding
ENSMUSG00000026343	4.03953	1.41547	1.23522	1.14592	0.251827		0.0343862	0.196181	1	ensembl_havana	125676995	125873862	ENSMUSG00000026343	Gpr39	71111	protein_coding
ENSMUSG00000026344	5.40795	-0.859572	0.841965	-1.02091	0.307296		-0.0443625	0.19618	1	ensembl_havana	125867622	125913101	ENSMUSG00000026344	Lypd1	72585	protein_coding
ENSMUSG00000049690	15.5645	-0.548845	0.576156	-0.952599	0.340794	0.630103	-0.0577482	0.195097	1	ensembl_havana	125913620	126830799	ENSMUSG00000049690	Nckap5	210356	protein_coding
ENSMUSG00000036155	540.587	0.223676	0.144968	1.54293	0.122847	0.364953	0.157642	0.131737	1	ensembl_havana	127205015	127488336	ENSMUSG00000036155	Mgat5	107895	protein_coding
ENSMUSG00000099471	185.313	-0.125952	0.208844	-0.603093	0.546447	0.791116	-0.0594023	0.147385	1	havana	127282662	127283108	ENSMUSG00000099471	Gm8451	667090	processed_pseudogene
ENSMUSG00000026347	5.06601	-0.695077	0.989289	-0.702602	0.482304		-0.0257677	0.192833	1	ensembl_havana	127486546	127679548	ENSMUSG00000026347	Tmem163	72160	protein_coding
ENSMUSG00000026348	1.47177	2.71169	1.91345	1.41717	0.156432		0.0271747	0.19589	1	ensembl_havana	127729413	127767978	ENSMUSG00000026348	Acmsd	266645	protein_coding
ENSMUSG00000102014	17.6979	0.422568	0.510131	0.828352	0.407471	0.6906	0.0555089	0.191145	1	havana	127753616	127774092	ENSMUSG00000102014	2900009J06Rik	100502745	antisense
ENSMUSG00000026349	6400.7	-0.0729923	0.105983	-0.688716	0.491002	0.754779	-0.0568523	0.0943183	1	ensembl_havana	127774164	127808061	ENSMUSG00000026349	Ccnt2	72949	protein_coding
ENSMUSG00000036104	1861.76	0.0810255	0.084595	0.957805	0.338161	0.627294	0.0687824	0.0786176	1	ensembl_havana	127868773	127943868	ENSMUSG00000036104	Rab3gap1	226407	protein_coding
ENSMUSG00000036086	1586.18	-0.0432412	0.0912936	-0.473649	0.63575	0.842388	-0.035437	0.0829658	1	ensembl_havana	127954184	128103047	ENSMUSG00000036086	Zranb3	226409	protein_coding
ENSMUSG00000104164	147.543	0.101278	0.234251	0.432348	0.665489	0.857849	0.0418793	0.152489	1	havana	127978905	127984687	ENSMUSG00000104164	Gm38248		TEC
ENSMUSG00000058603	252.813	-0.118129	0.193948	-0.609073	0.542476	0.788347	-0.0603031	0.141981	1	havana	128038569	128038982	ENSMUSG00000058603	Rpl28-ps1	100042670	processed_pseudogene
ENSMUSG00000102782	15.7972	0.038458	0.559317	0.0687588	0.945182	0.981073	0.00426993	0.183332	1	havana	128084460	128089331	ENSMUSG00000102782	Gm37625		TEC
ENSMUSG00000103999	2.40499	0.709574	1.4735	0.481556	0.630121		0.0121755	0.192877	1	havana	128097591	128101470	ENSMUSG00000103999	Gm38026		TEC
ENSMUSG00000056211	4684.31	0.101754	0.0896183	1.13541	0.256203	0.546603	0.0852275	0.0831934	1	ensembl_havana	128103301	128237736	ENSMUSG00000056211	R3hdm1	226412	protein_coding
ENSMUSG00000103497	2.17955	0.46236	1.54847	0.298592	0.765251		0.00723245	0.192655	1	havana	128163214	128164529	ENSMUSG00000103497	Gm37407		TEC
ENSMUSG00000026353	2585.78	0.124764	0.109553	1.13884	0.254769	0.544761	0.097339	0.0991904	1	ensembl_havana	128243964	128279378	ENSMUSG00000026353	Ubxn4	67812	protein_coding
ENSMUSG00000026354	6.7182	-0.442719	0.75636	-0.585328	0.558327		-0.0274254	0.190571	1	ensembl_havana	128284756	128328318	ENSMUSG00000026354	Lct	226413	protein_coding
ENSMUSG00000026355	14895.4	-0.0995752	0.0965108	-1.03175	0.302188	0.592666	-0.083936	0.0885644	1	ensembl_havana	128331590	128359664	ENSMUSG00000026355	Mcm6	17219	protein_coding
ENSMUSG00000026356	8422.64	-0.0429198	0.0701167	-0.612119	0.540459	0.787062	-0.0376715	0.0661528	1	ensembl_havana	128363707	128417368	ENSMUSG00000026356	Dars	226414	protein_coding
ENSMUSG00000100078	77.2665	-0.057184	0.308567	-0.185321	0.852977	0.944497	-0.017009	0.164896	1	havana	128520073	128521460	ENSMUSG00000100078	Gm6170		processed_pseudogene
ENSMUSG00000045382	17.7577	-0.10501	0.474192	-0.221452	0.824741	0.933135	-0.0149547	0.180207	1	ensembl_havana	128588199	128592293	ENSMUSG00000045382	Cxcr4	12767	protein_coding
ENSMUSG00000042581	2.11067	0.344256	1.458	0.236115	0.813343		0.00603924	0.192407	1	ensembl_havana	129273302	130219278	ENSMUSG00000042581	Thsd7b	210417	protein_coding
ENSMUSG00000089648	5.95234	0.560075	0.893288	0.626981	0.530671		0.0254897	0.191923	1	havana	129796608	129797858	ENSMUSG00000089648	Gm15790	100534274	processed_pseudogene
ENSMUSG00000094122	5.79909	-0.656999	1.01684	-0.646117	0.518204		-0.0229725	0.192539	1	ensembl_havana	129801387	129801764	ENSMUSG00000094122	Rpl31-ps9		processed_pseudogene
ENSMUSG00000086825	29.4374	0.475732	0.549119	0.866356	0.386295	0.671969	0.0547817	0.192845	1	havana	130429781	130437191	ENSMUSG00000086825	Gm15675		lincRNA
ENSMUSG00000026399	499.588	0.309712	0.17292	1.79108	0.073281	0.26946	0.205458	0.161756	1	ensembl_havana	130439027	130462744	ENSMUSG00000026399	Cd55	13136	protein_coding
ENSMUSG00000026409	236.128	0.202309	0.182622	1.1078	0.267947	0.557752	0.115776	0.147876	1	ensembl_havana	130689182	130729253	ENSMUSG00000026409	Pfkfb2	18640	protein_coding
ENSMUSG00000046404	545.782	0.130437	0.13322	0.979109	0.327526	0.617149	0.0917645	0.115145	1	ensembl_havana	130717327	130724358	ENSMUSG00000046404	Yod1	226418	protein_coding
ENSMUSG00000042510	35.3191	0.697791	0.411913	1.69403	0.09026	0.305724	0.159721	0.252839	1	ensembl_havana	130731976	130744622	ENSMUSG00000042510	AA986860	212439	protein_coding
ENSMUSG00000026415	2.12275	1.53205	1.52128	1.00708	0.313895		0.0251949	0.194817	1	ensembl_havana	130800902	130814740	ENSMUSG00000026415	Fcamr	64435	protein_coding
ENSMUSG00000026420	2.91284	-4.10117	2.03791	-2.01244	0.0441735		-0.0317559	0.197365	1	ensembl_havana	130882074	130887454	ENSMUSG00000026420	Il24	93672	protein_coding
ENSMUSG00000016528	1008.66	0.251497	0.135607	1.8546	0.063653	0.245952	0.189065	0.128285	1	ensembl_havana	131053700	131097826	ENSMUSG00000016528	Mapkapk2	17164	protein_coding
ENSMUSG00000016526	1809.57	-0.114682	0.0992683	-1.15528	0.247977	0.5378	-0.0925013	0.0911101	1	ensembl_havana	131127455	131138340	ENSMUSG00000016526	Dyrk3	226419	protein_coding
ENSMUSG00000026427	3729.1	0.00940523	0.0734351	0.128075	0.898089	0.96449	0.0082943	0.0686898	1	ensembl_havana	131153181	131187658	ENSMUSG00000026427	Eif2d	16865	protein_coding
ENSMUSG00000026430	83.4853	-0.391594	0.264923	-1.47814	0.13937	0.391018	-0.16488	0.206873	1	ensembl_havana	131176410	131245258	ENSMUSG00000026430	Rassf5	54354	protein_coding
ENSMUSG00000042349	78.7718	1.39025	0.342567	4.05834	4.9422e-05	0.00118276	1.20634	0.368686	1	ensembl_havana	131254343	131279606	ENSMUSG00000042349	Ikbke	56489	protein_coding
ENSMUSG00000026425	3888.78	0.0194311	0.124106	0.156568	0.875585	0.953408	0.0134613	0.104679	1	ensembl_havana	131285251	131527352	ENSMUSG00000026425	Srgap2	14270	protein_coding
ENSMUSG00000101778	1.99712	-0.331592	1.34621	-0.246315	0.805438		-0.00670439	0.192156	1	havana	131406812	131409213	ENSMUSG00000101778	Gm29488		sense_intronic
ENSMUSG00000055184	384.202	-0.0105618	0.13957	-0.0756737	0.939679	0.979053	-0.00683878	0.113331	1	ensembl_havana	131527903	131539872	ENSMUSG00000055184	Fam72a	108900	protein_coding
ENSMUSG00000052688	1.78613	0.506536	1.39726	0.362521	0.716963		0.00967361	0.192459	1	ensembl_havana	131688695	131715439	ENSMUSG00000052688	Rab7b	226421	protein_coding
ENSMUSG00000042268	34.3006	-0.99589	0.391259	-2.54535	0.010917	0.076441	-0.547157	0.549919	1	ensembl_havana	131744022	131771504	ENSMUSG00000042268	Slc26a9	320718	protein_coding
ENSMUSG00000042251	258.968	0.0619626	0.165227	0.375015	0.70765	0.882405	0.0363102	0.127144	1	ensembl_havana	131797381	131821473	ENSMUSG00000042251	Pm20d1	212933	protein_coding
ENSMUSG00000013275	1288.89	0.250358	0.166284	1.5056	0.132169	0.379279	0.162566	0.148113	1	ensembl_havana	131827493	131848865	ENSMUSG00000013275	Slc41a1	98396	protein_coding
ENSMUSG00000026433	120.759	0.233866	0.214721	1.08916	0.276084	0.565403	0.114238	0.162988	1	ensembl_havana	131867224	131872887	ENSMUSG00000026433	Rab29	226422	protein_coding
ENSMUSG00000100026	3.4223	-0.586139	1.16462	-0.503287	0.614762		-0.0157138	0.192283	1	havana	131907165	131907954	ENSMUSG00000100026	Gm29105		unprocessed_pseudogene
ENSMUSG00000026434	18614	-0.190572	0.0899767	-2.11802	0.0341737	0.164484	-0.164271	0.0867952	1	ensembl_havana	131910534	131936321	ENSMUSG00000026434	Nucks1	98415	protein_coding
ENSMUSG00000103569	45.2744	-0.448838	0.306504	-1.46438	0.14309	0.39602	-0.154952	0.21808	1	havana	131914529	131916439	ENSMUSG00000103569	Gm38067		TEC
ENSMUSG00000026435	176.829	0.303003	0.179284	1.69007	0.0910146	0.307311	0.193078	0.164112	1	ensembl_havana	131962967	131982969	ENSMUSG00000026435	Slc45a3	212980	protein_coding
ENSMUSG00000026436	587.376	-0.0941301	0.149717	-0.628719	0.529533	0.78159	-0.0596434	0.121552	1	ensembl_havana	132007607	132032612	ENSMUSG00000026436	Elk4	13714	protein_coding
ENSMUSG00000059149	25.1862	2.15947	0.69974	3.0861	0.00202801	0.0213474	1.54731	0.890738	1	ensembl_havana	132022806	132068062	ENSMUSG00000059149	Mfsd4a	213006	protein_coding
ENSMUSG00000103966	2.78661	0.200555	1.14207	0.175608	0.860602		0.00569109	0.191341	1	havana	132102365	132108323	ENSMUSG00000103966	Gm37120		TEC
ENSMUSG00000026437	707.063	0.396285	0.167052	2.37222	0.0176816	0.107343	0.295109	0.16923	1	ensembl_havana	132112237	132139684	ENSMUSG00000026437	Cdk18	18557	protein_coding
ENSMUSG00000079330	52.924	-0.420306	0.335958	-1.25107	0.210909	0.493534	-0.119013	0.203652	1	ensembl_havana	132191431	132259227	ENSMUSG00000079330	Lemd1	213409	protein_coding
ENSMUSG00000118219	277.952	-0.616907	0.173999	-3.54546	0.000391935	0.00613125	-0.526224	0.183213	1	havana	132191457	132209546	ENSMUSG00000118219	Gm29695		protein_coding
ENSMUSG00000065435	3.55092	-2.34463	1.23497	-1.89853	0.0576263		-0.0604083	0.205687	1	mirbase	132198088	132198184	ENSMUSG00000065435	Mir135b	723818	miRNA
ENSMUSG00000101549	23.7948	0.424233	0.582631	0.728132	0.466533	0.737065	0.043454	0.190382	1	havana	132274716	132280411	ENSMUSG00000101549	Gm29630		lincRNA
ENSMUSG00000089808	16.807	-0.74133	0.558209	-1.32805	0.184161	0.457676	-0.086417	0.208611	1	havana	132284453	132284809	ENSMUSG00000089808	Gm7241	638532	processed_pseudogene
ENSMUSG00000042115	4.94439	-1.49929	0.991726	-1.5118	0.130584		-0.0575283	0.20288	1	ensembl_havana	132298626	132307357	ENSMUSG00000042115	Klhdc8a	213417	protein_coding
ENSMUSG00000009772	307.92	0.227559	0.168643	1.34936	0.177223	0.447587	0.142873	0.145651	1	ensembl_havana	132316126	132333488	ENSMUSG00000009772	Nuak2	74137	protein_coding
ENSMUSG00000100658	4.18712	0.0883941	1.07987	0.0818563	0.934761		0.00285444	0.190928	1	havana	132342023	132349626	ENSMUSG00000100658	F730311O21Rik		lincRNA
ENSMUSG00000042066	285.863	0.258911	0.221069	1.17118	0.241527	0.530372	0.124828	0.169299	1	ensembl_havana	132356315	132391281	ENSMUSG00000042066	Tmcc2	68875	protein_coding
ENSMUSG00000042046	496.332	0.232634	0.167858	1.38589	0.165779	0.431492	0.147796	0.146194	1	ensembl_havana	132417555	132466958	ENSMUSG00000042046	Dstyk	213452	protein_coding
ENSMUSG00000097760	10.988	-0.590264	0.665111	-0.887466	0.374828	0.663289	-0.0473931	0.194052	1	havana	132466433	132477064	ENSMUSG00000097760	6030442K20Rik	115487119	processed_transcript
ENSMUSG00000026439	3655.01	0.0336638	0.12293	0.273846	0.784203	0.916228	0.0247485	0.104188	1	ensembl_havana	132477365	132505659	ENSMUSG00000026439	Rbbp5	213464	protein_coding
ENSMUSG00000048174	246.818	0.320388	0.206867	1.54876	0.121439	0.36325	0.178116	0.1798	1	ensembl_havana	132506230	132508639	ENSMUSG00000048174	Tmem81	74626	protein_coding
ENSMUSG00000053024	169.033	-0.27052	0.215629	-1.25456	0.209639	0.491843	-0.135498	0.170328	1	ensembl_havana	132509427	132543256	ENSMUSG00000053024	Cntn2	21367	protein_coding
ENSMUSG00000026442	220.058	0.0802625	0.20258	0.396202	0.691956	0.874319	0.0389483	0.142267	1	ensembl_havana	132564690	132741797	ENSMUSG00000026442	Nfasc	269116	protein_coding
ENSMUSG00000026443	139.482	0.0520046	0.31192	0.166724	0.867587	0.950083	0.013769	0.165191	1	ensembl_havana	132880273	132940005	ENSMUSG00000026443	Lrrn2	16980	protein_coding
ENSMUSG00000054387	15745.3	0.219593	0.101752	2.15812	0.0309189	0.155017	0.184992	0.0983275	1	ensembl_havana	132959484	133030561	ENSMUSG00000054387	Mdm4	17248	protein_coding
ENSMUSG00000100228	18.9665	-0.0795718	0.500968	-0.158836	0.873798	0.952624	-0.0102454	0.181191	1	havana	133025801	133026439	ENSMUSG00000100228	Gm29257	102636216	processed_pseudogene
ENSMUSG00000026447	460.059	0.663594	0.150302	4.41508	1.00975e-05	0.000333023	0.602176	0.155665	1	ensembl_havana	133045667	133108687	ENSMUSG00000026447	Pik3c2b	240752	protein_coding
ENSMUSG00000102425	13.2114	-0.103976	0.541694	-0.191946	0.847785	0.942426	-0.0116975	0.183059	1	ensembl_havana	133128676	133131782	ENSMUSG00000102425	Gm26616		TEC
ENSMUSG00000046062	6743.51	0.0670286	0.0761537	0.880176	0.378764	0.666734	0.0585201	0.0714933	1	ensembl_havana	133131143	133139783	ENSMUSG00000046062	Ppp1r15b	108954	protein_coding
ENSMUSG00000041757	291.821	0.807408	0.1726	4.67791	2.89811e-06	0.000119707	0.73666	0.179233	1	ensembl_havana	133164210	133303435	ENSMUSG00000041757	Plekha6	240753	protein_coding
ENSMUSG00000070645	21.1342	0.505555	0.607549	0.832122	0.40534	0.689267	0.0480527	0.192697	1	ensembl_havana	133350510	133360325	ENSMUSG00000070645	Ren1		protein_coding
ENSMUSG00000070644	173.113	-0.0404606	0.21391	-0.189148	0.849977	0.942969	-0.0181269	0.144192	1	ensembl_havana	133363572	133380336	ENSMUSG00000070644	Etnk2	214253	protein_coding
ENSMUSG00000070643	791.059	-0.351586	0.10415	-3.37575	0.000736138	0.0100072	-0.312004	0.104998	1	ensembl_havana	133382303	133424377	ENSMUSG00000070643	Sox13	20668	protein_coding
ENSMUSG00000090553	5450.69	-0.148192	0.073957	-2.00376	0.0450954	0.196578	-0.132451	0.0713849	1	ensembl_havana	133603871	133610291	ENSMUSG00000090553	Snrpe	20643	protein_coding
ENSMUSG00000102976	667.152	0.0756555	0.144083	0.525082	0.599526	0.822049	0.0494893	0.117625	1	havana	133619862	133661380	ENSMUSG00000102976	Zc3h11a	70579	protein_coding
ENSMUSG00000094410	2853.59	-0.0267951	0.110276	-0.242982	0.808019	0.925917	-0.0202985	0.0960558	1	ensembl_havana	133619940	133661318	ENSMUSG00000094410	Gm38394	667118	protein_coding
ENSMUSG00000051998	60.57	-0.0286383	0.358277	-0.0799334	0.93629	0.97773	-0.0062956	0.170711	1	ensembl_havana	133679091	133690108	ENSMUSG00000051998	Lax1	240754	protein_coding
ENSMUSG00000026463	712.8	0.612824	0.166358	3.68376	0.00022982	0.0040296	0.530807	0.174429	1	ensembl_havana	133699457	133801041	ENSMUSG00000026463	Atp2b4	381290	protein_coding
ENSMUSG00000020423	1301.34	-0.0500417	0.143958	-0.347612	0.728132	0.892976	-0.0321344	0.116435	1	ensembl_havana	134075170	134079120	ENSMUSG00000020423	Btg2	12227	protein_coding
ENSMUSG00000026450	10.5801	3.10394	1.14631	2.70776	0.00677382	0.053343	0.0864797	0.22188	1	ensembl_havana	134111242	134151540	ENSMUSG00000026450	Chit1	71884	protein_coding
ENSMUSG00000064246	8.80338	0.972662	0.884765	1.09934	0.271618	0.561863	0.0455845	0.197214	1	ensembl_havana	134182176	134190181	ENSMUSG00000064246	Chil1	12654	protein_coding
ENSMUSG00000042451	3.44339	2.39021	1.29418	1.84689	0.0647627		0.0582839	0.204747	1	ensembl_havana	134193448	134201232	ENSMUSG00000042451	Mybph	53311	protein_coding
ENSMUSG00000042429	19.4075	2.83255	0.883867	3.20473	0.00135189	0.0156533	2.10652	1.09156	1	ensembl_havana	134199223	134235431	ENSMUSG00000042429	Adora1	11539	protein_coding
ENSMUSG00000026459	4.77796	-0.699263	0.909271	-0.769037	0.441871		-0.0305992	0.19315	1	ensembl_havana	134289989	134292548	ENSMUSG00000026459	Myog	17928	protein_coding
ENSMUSG00000026458	1485.73	0.40688	0.179565	2.26592	0.0234561	0.130409	0.289951	0.181709	1	ensembl_havana	134296783	134332928	ENSMUSG00000026458	Ppfia4	68507	protein_coding
ENSMUSG00000042305	4272.74	0.104894	0.0931383	1.12622	0.260072	0.550296	0.086778	0.0860525	1	ensembl_havana	134346097	134361979	ENSMUSG00000042305	Tmem183a	57439	protein_coding
ENSMUSG00000050526	3.31035	0.287156	1.14473	0.250851	0.80193		0.00808063	0.191484	1	ensembl_havana	134385940	134390981	ENSMUSG00000050526	Mgat4f	240755	protein_coding
ENSMUSG00000026456	8715.52	0.16692	0.188432	0.885836	0.375706	0.664173	0.0905075	0.145181	1	ensembl_havana	134405559	134411740	ENSMUSG00000026456	Cyb5r1	72017	protein_coding
ENSMUSG00000026457	4459.43	0.0209219	0.0837851	0.249709	0.802812	0.923022	0.0175131	0.0769765	1	ensembl_havana	134415378	134433351	ENSMUSG00000026457	Adipor1	72674	protein_coding
ENSMUSG00000101061	7.88396	-0.105202	0.742629	-0.141661	0.887348		-0.00656845	0.187841	1	havana	134435628	134439597	ENSMUSG00000101061	Platr1		lincRNA
ENSMUSG00000102722	2.76072	-0.171805	1.17868	-0.145761	0.88411		-0.00448742	0.191458	1	havana	134454492	134455473	ENSMUSG00000102722	Gm37935		TEC
ENSMUSG00000026455	2251.13	0.0266035	0.0944634	0.281628	0.778229	0.913655	0.0215921	0.0850715	1	ensembl_havana	134455531	134491018	ENSMUSG00000026455	Klhl12	240756	protein_coding
ENSMUSG00000042229	2101.76	0.0596863	0.0956294	0.624141	0.532535	0.783044	0.0483755	0.0865284	1	ensembl_havana	134494648	134508774	ENSMUSG00000042229	Rabif	98710	protein_coding
ENSMUSG00000077202	2.36922	-0.277394	1.2902	-0.215	0.829767		-0.00605779	0.19196	1	ensembl	134505338	134505463	ENSMUSG00000077202	Gm25612	115485771	snoRNA
ENSMUSG00000096712	7.44177	0.903493	0.754485	1.1975	0.231113		0.0589659	0.200289	1	havana	134518081	134518563	ENSMUSG00000096712	Gm15454		processed_pseudogene
ENSMUSG00000101955	2.7432	0.563441	1.23588	0.455903	0.64846		0.0136826	0.192312	1	havana	134519978	134524139	ENSMUSG00000101955	Gm29376		unprocessed_pseudogene
ENSMUSG00000046367	62.8071	-0.522996	0.28931	-1.80774	0.0706474	0.262472	-0.223569	0.25697	1	ensembl_havana	134540941	134549682	ENSMUSG00000046367	Mgat4e	71001	protein_coding
ENSMUSG00000042207	23952.2	-0.340006	0.100526	-3.38226	0.00071892	0.00984319	-0.303192	0.101144	1	ensembl_havana	134560171	134635285	ENSMUSG00000042207	Kdm5b	75605	protein_coding
ENSMUSG00000026452	12.7932	-0.090384	0.651253	-0.138785	0.88962	0.960646	-0.00723996	0.186065	1	ensembl_havana	134646677	134762593	ENSMUSG00000026452	Syt2	20980	protein_coding
ENSMUSG00000073557	253.439	0.145442	0.17202	0.845498	0.397833	0.682708	0.0847979	0.136331	1	ensembl_havana	134754658	134955942	ENSMUSG00000073557	Ppp1r12b	329251	protein_coding
ENSMUSG00000103976	28.1709	0.0402908	0.416027	0.0968466	0.922848	0.97302	0.0073522	0.175968	1	havana	134819916	134827549	ENSMUSG00000103976	Gm37677		TEC
ENSMUSG00000101168	2.10277	0.366205	1.31098	0.279338	0.779986		0.00792979	0.192099	1	havana	134834142	134846415	ENSMUSG00000101168	Gm28892		antisense
ENSMUSG00000026429	1092.29	-0.0409205	0.130196	-0.314298	0.753295	0.903549	-0.0281972	0.108627	1	ensembl_havana	134962565	134974162	ENSMUSG00000026429	Ube2t	67196	protein_coding
ENSMUSG00000042793	74.9632	0.0454293	0.318069	0.142828	0.886426	0.958919	0.0124848	0.165995	1	ensembl_havana	134983301	135105276	ENSMUSG00000042793	Lgr6	329252	protein_coding
ENSMUSG00000097993	711.916	-0.113608	0.167023	-0.680191	0.496384	0.758975	-0.0666474	0.131156	1	ensembl_havana	135108497	135132594	ENSMUSG00000097993	Ptprv	13924	polymorphic_pseudogene
ENSMUSG00000097988	35.9521	0.00755533	0.409215	0.018463	0.985269	0.994296	0.00156212	0.17529	1	havana	135108961	135113378	ENSMUSG00000097988	Gm10535		antisense
ENSMUSG00000031506	119.666	0.464244	0.357208	1.29965	0.193722	0.470758	0.120965	0.209529	1	ensembl_havana	135132700	135145317	ENSMUSG00000031506	Ptpn7	320139	protein_coding
ENSMUSG00000026426	1234.71	-0.0776299	0.131738	-0.589277	0.555676	0.795898	-0.0536124	0.110887	1	ensembl_havana	135146824	135156269	ENSMUSG00000026426	Arl8a	68724	protein_coding
ENSMUSG00000085311	3.00305	-0.671181	1.20853	-0.555371	0.578641		-0.0168671	0.192596	1	havana	135152963	135153806	ENSMUSG00000085311	Gm15445		antisense
ENSMUSG00000026424	4.56689	1.3371	0.971364	1.37652	0.16866		0.0542524	0.201086	1	ensembl_havana	135160234	135167681	ENSMUSG00000026424	Gpr37l1	171469	protein_coding
ENSMUSG00000079139	2217.74	-0.228096	0.102536	-2.22454	0.026112	0.139007	-0.190997	0.0993519	1	havana	135231995	135233225	ENSMUSG00000079139	Gm4204	100043064	processed_pseudogene
ENSMUSG00000003051	1200.27	0.355574	0.124519	2.85559	0.00429571	0.037925	0.299431	0.12558	1	ensembl_havana	135253575	135258568	ENSMUSG00000003051	Elf3	13710	protein_coding
ENSMUSG00000041926	1568.35	-0.0488483	0.107248	-0.45547	0.648771	0.849511	-0.0375125	0.0944643	1	ensembl_havana	135262712	135284084	ENSMUSG00000041926	Rnpep	215615	protein_coding
ENSMUSG00000062580	3062.04	0.106952	0.0997129	1.0726	0.283452	0.572954	0.0863853	0.0911412	1	ensembl_havana	135295213	135313778	ENSMUSG00000062580	Timm17a	21854	protein_coding
ENSMUSG00000048096	25.6477	-0.615981	0.387979	-1.58767	0.112362	0.348505	-0.151115	0.238934	1	ensembl_havana	135324807	135368065	ENSMUSG00000048096	Lmod1	93689	protein_coding
ENSMUSG00000041889	34.6992	-0.392207	0.358637	-1.0936	0.274129	0.563756	-0.0969698	0.195588	1	ensembl_havana	135371057	135375237	ENSMUSG00000041889	Shisa4	77552	protein_coding
ENSMUSG00000041879	6586.59	0.119894	0.0865657	1.385	0.166051	0.431789	0.101626	0.081334	1	ensembl_havana	135382312	135430499	ENSMUSG00000041879	Ipo9	226432	protein_coding
ENSMUSG00000009418	1766.32	0.501468	0.149744	3.34885	0.000811491	0.0106931	0.42795	0.155464	1	ensembl_havana	135434580	135688105	ENSMUSG00000009418	Nav1	215690	protein_coding
ENSMUSG00000104524	1.58188	0.899741	1.87196	0.480641	0.630772		0.0095826	0.193298	1	havana	135523088	135525338	ENSMUSG00000104524	Gm37333		TEC
ENSMUSG00000026421	1585.47	0.0499728	0.136328	0.366563	0.713945	0.885892	0.0311823	0.112218	1	ensembl_havana	135720061	135752232	ENSMUSG00000026421	Csrp1	13007	protein_coding
ENSMUSG00000041801	1206.11	0.209394	0.117449	1.78285	0.0746101	0.272829	0.164796	0.110645	1	ensembl_havana	135766119	135769136	ENSMUSG00000041801	Phlda3	27280	protein_coding
ENSMUSG00000026418	13.907	0.697381	0.786939	0.886194	0.375513	0.664105	0.040782	0.194399	1	ensembl_havana	135779434	135810989	ENSMUSG00000026418	Tnni1	21952	protein_coding
ENSMUSG00000041782	636.335	-0.549951	0.202035	-2.72205	0.00648784	0.0517499	-0.412117	0.21668	1	ensembl_havana	135818598	135833342	ENSMUSG00000041782	Lad1	16763	protein_coding
ENSMUSG00000026414	16.0824	1.3201	0.705386	1.87146	0.0612814	0.240027	0.103555	0.22739	1	ensembl_havana	135836354	135852260	ENSMUSG00000026414	Tnnt2	21956	protein_coding
ENSMUSG00000101482	3.57682	-0.129496	1.16414	-0.111238	0.911428		-0.00340714	0.191386	1	havana	135869782	135870150	ENSMUSG00000101482	Gm28883		processed_pseudogene
ENSMUSG00000026413	3.23617	-0.348323	1.35731	-0.256627	0.797466		-0.00693536	0.192195	1	ensembl_havana	135871395	135919207	ENSMUSG00000026413	Pkp1	18772	protein_coding
ENSMUSG00000026411	704.55	0.0369949	0.11413	0.324146	0.745828	0.900674	0.0276641	0.0987399	1	ensembl_havana	136008150	136035342	ENSMUSG00000026411	Tmem9	66241	protein_coding
ENSMUSG00000026407	55.4415	0.136656	0.371973	0.367383	0.713334	0.885509	0.0297085	0.174344	1	ensembl_havana	136052750	136119822	ENSMUSG00000026407	Cacna1s	12292	protein_coding
ENSMUSG00000041642	729.044	0.0725305	0.211171	0.343468	0.731246	0.894573	0.0336764	0.144582	1	ensembl_havana	136131389	136177998	ENSMUSG00000041642	Kif21b	16565	protein_coding
ENSMUSG00000087230	5.3927	-0.659912	0.959133	-0.688029	0.491434		-0.0259661	0.192636	1	havana	136181652	136212828	ENSMUSG00000087230	Mroh3	76422	protein_coding
ENSMUSG00000041605	599.849	-0.232786	0.123286	-1.88817	0.0590025	0.234479	-0.181618	0.117057	1	ensembl_havana	136213531	136234264	ENSMUSG00000041605	Inava	67313	protein_coding
ENSMUSG00000041570	2118.69	-0.10885	0.124185	-0.876513	0.380751	0.667801	-0.077749	0.107994	1	ensembl_havana	136268123	136346104	ENSMUSG00000041570	Camsap2	67886	protein_coding
ENSMUSG00000097403	24.3323	-0.145176	0.453647	-0.320019	0.748954	0.901909	-0.0224005	0.17987	1	havana	136411916	136415519	ENSMUSG00000097403	9230116N13Rik	320054	processed_transcript
ENSMUSG00000026404	710.701	-0.0381468	0.115103	-0.331415	0.740331	0.899339	-0.0280821	0.0993937	1	ensembl_havana	136415271	136440158	ENSMUSG00000026404	Ddx59	67997	protein_coding
ENSMUSG00000041498	2080.34	0.0197441	0.08531	0.231439	0.816974	0.929809	0.0165454	0.0781513	1	ensembl_havana	136466343	136531511	ENSMUSG00000041498	Kif14	381293	protein_coding
ENSMUSG00000097229	1.93312	-0.358961	1.70786	-0.210182	0.833526		-0.00455717	0.192804	1	havana	136622098	136624650	ENSMUSG00000097229	Platr23		lincRNA
ENSMUSG00000041483	8381.29	-0.255321	0.130355	-1.95866	0.0501532	0.210714	-0.19666	0.124536	1	ensembl_havana	136624901	136630053	ENSMUSG00000041483	Zfp281	226442	protein_coding
ENSMUSG00000097113	687.121	-0.0766177	0.121813	-0.628976	0.529365	0.78159	-0.0554809	0.104866	1	havana	136670769	136690804	ENSMUSG00000097113	Gm19705	100503460	lincRNA
ENSMUSG00000097448	169.828	-0.349502	0.190947	-1.83036	0.0671955	0.254378	-0.219253	0.179698	1	havana	136696211	136726142	ENSMUSG00000097448	Platr22		lincRNA
ENSMUSG00000104360	5.27462	-0.563781	0.900335	-0.62619	0.53119		-0.0249982	0.191927	1	havana	136789182	136789520	ENSMUSG00000104360	Gm8762		processed_pseudogene
ENSMUSG00000103953	56.6533	-0.233068	0.264273	-0.88192	0.37782	0.665926	-0.0863558	0.171183	1	havana	136793034	136793510	ENSMUSG00000103953	Gm29718		processed_pseudogene
ENSMUSG00000026398	3158.58	-0.131714	0.175213	-0.751739	0.452208	0.725347	-0.0733847	0.136004	1	ensembl_havana	136842571	136960448	ENSMUSG00000026398	Nr5a2	26424	protein_coding
ENSMUSG00000026393	1715.84	0.167481	0.085589	1.95681	0.0503703	0.211101	0.145458	0.0821561	1	ensembl_havana	138482875	138620141	ENSMUSG00000026393	Nek7	59125	protein_coding
ENSMUSG00000019230	3.27975	-1.07777	1.19004	-0.90566	0.365116		-0.0279282	0.194424	1	ensembl_havana	138825186	138848577	ENSMUSG00000019230	Lhx9	16876	protein_coding
ENSMUSG00000079283	158.434	0.201375	0.179959	1.119	0.263139	0.552772	0.116925	0.146661	1	ensembl_havana	138851983	138856852	ENSMUSG00000079283	2310009B15Rik	69549	protein_coding
ENSMUSG00000056268	1103.84	0.0722178	0.135169	0.534277	0.59315	0.818839	0.0493466	0.112611	1	ensembl_havana	138963435	139178960	ENSMUSG00000056268	Dennd1b	329260	protein_coding
ENSMUSG00000104900	1.60492	0.918479	1.58514	0.57943	0.562299		0.013732	0.19323	1	havana	138977656	138979246	ENSMUSG00000104900	4930596I21Rik	78229	sense_intronic
ENSMUSG00000063681	3.62499	-0.0474787	1.10532	-0.0429547	0.965738		-0.00134492	0.191051	1	ensembl_havana	139197056	139377100	ENSMUSG00000063681	Crb1	170788	protein_coding
ENSMUSG00000033964	1000.63	-0.152028	0.103154	-1.4738	0.140535	0.392399	-0.122943	0.0959212	1	ensembl_havana	139422288	139453005	ENSMUSG00000033964	Zbtb41	226470	protein_coding
ENSMUSG00000033952	4773.75	0.0820877	0.125317	0.655039	0.512442	0.770405	0.0589495	0.107312	1	ensembl_havana	139454772	139494091	ENSMUSG00000033952	Aspm	12316	protein_coding
ENSMUSG00000026368	5.03344	0.564252	0.852601	0.661801	0.508099		0.028272	0.191977	1	ensembl_havana	139501702	139523752	ENSMUSG00000026368	F13b	14060	protein_coding
ENSMUSG00000089991	9.89163	0.0951906	0.817363	0.116461	0.907287	0.967057	0.00522628	0.1888	1	havana	139862957	139936477	ENSMUSG00000089991	Gm16332		unprocessed_pseudogene
ENSMUSG00000104496	52.3559	-0.0602412	0.321415	-0.187425	0.851327	0.943411	-0.015886	0.166652	1	havana	139928240	139929608	ENSMUSG00000104496	Gm5837	545399	processed_pseudogene
ENSMUSG00000026365	19.4339	1.26621	0.494606	2.56004	0.0104661	0.0740441	0.59884	0.939356	1	ensembl_havana	140084708	140183764	ENSMUSG00000026365	Cfh	12628	protein_coding
ENSMUSG00000052726	121.434	0.21156	0.211732	0.999188	0.317704	0.60743	0.103747	0.158637	1	ensembl_havana	140246158	140612067	ENSMUSG00000052726	Kcnt2	240776	protein_coding
ENSMUSG00000102368	3.89984	5.26459	1.57332	3.34617	0.000819357		0.0844945	0.221292	1	havana	140570176	140656404	ENSMUSG00000102368	4930590L20Rik	75910	antisense
ENSMUSG00000102740	2.06211	0.851556	1.38636	0.614239	0.539057		0.0166166	0.193113	1	havana	141356789	141357277	ENSMUSG00000102740	Gm37599		TEC
ENSMUSG00000101795	91.6823	-0.269519	0.277938	-0.969706	0.332193	0.62193	-0.0948126	0.177943	1	havana	143093347	143094616	ENSMUSG00000101795	Gm5835	545369	processed_pseudogene
ENSMUSG00000026361	5588.85	-0.129885	0.0843838	-1.53922	0.123751	0.365473	-0.111682	0.0798716	1	ensembl_havana	143598800	143702893	ENSMUSG00000026361	Cdc73	214498	protein_coding
ENSMUSG00000089640	15.3295	0.320529	0.529645	0.605177	0.545061	0.790275	0.0387598	0.186959	1	havana	143683230	143684298	ENSMUSG00000089640	Gm6397		processed_pseudogene
ENSMUSG00000018196	826.665	-0.11616	0.147894	-0.785428	0.432202	0.708639	-0.0752518	0.122179	1	ensembl_havana	143716338	143749676	ENSMUSG00000018196	Glrx2	69367	protein_coding
ENSMUSG00000018199	1992.78	-0.227605	0.119627	-1.90262	0.0570901	0.229482	-0.179329	0.113726	1	ensembl_havana	143750790	143777068	ENSMUSG00000018199	Ro60	20822	protein_coding
ENSMUSG00000018189	3931.83	-0.0880991	0.0843025	-1.04503	0.296007	0.586855	-0.0747818	0.0785604	1	ensembl_havana	143777272	143807466	ENSMUSG00000018189	Uchl5	56207	protein_coding
ENSMUSG00000100455	85.7369	-0.369053	0.224871	-1.64118	0.100761	0.327668	-0.194227	0.197512	1	havana	143777642	143781307	ENSMUSG00000100455	Gm29170		sense_intronic
ENSMUSG00000026360	18.8614	-1.27663	0.724239	-1.76272	0.0779482	0.280499	-0.0920276	0.219275	1	ensembl_havana	143999338	144004161	ENSMUSG00000026360	Rgs2	19735	protein_coding
ENSMUSG00000100441	2.21132	0.517796	1.45659	0.355484	0.722227		0.00912849	0.192577	1	havana	144312032	144312436	ENSMUSG00000100441	Gm7266	639456	processed_pseudogene
ENSMUSG00000090323	3.03603	-1.01126	1.23067	-0.821712	0.411241		-0.0246412	0.19392	1	havana	146420436	146421036	ENSMUSG00000090323	Gm5263		processed_pseudogene
ENSMUSG00000035131	2.92312	0.331062	1.14333	0.289559	0.772154		0.00937606	0.191549	1	ensembl_havana	146494760	146902472	ENSMUSG00000035131	Brinp3	215378	protein_coding
ENSMUSG00000080078	2.16787	-0.559431	1.27363	-0.439242	0.660486		-0.0126865	0.192362	1	havana	146725581	146729090	ENSMUSG00000080078	Gm15583		processed_pseudogene
ENSMUSG00000056220	129.264	-0.187937	0.220006	-0.854235	0.392975	0.678474	-0.0864399	0.157202	1	ensembl_havana	149829618	149961290	ENSMUSG00000056220	Pla2g4a	18783	protein_coding
ENSMUSG00000032487	43.17	0.48731	0.447031	1.0901	0.275668	0.564981	0.0829944	0.199132	1	ensembl_havana	150100031	150108227	ENSMUSG00000032487	Ptgs2	19225	protein_coding
ENSMUSG00000099875	39.2	-0.219503	0.351234	-0.624949	0.532005	0.782959	-0.0524982	0.17701	1	havana	150265535	150265999	ENSMUSG00000099875	Rbm3-ps		processed_pseudogene
ENSMUSG00000100690	263.136	-0.264629	0.200732	-1.31832	0.187397	0.461811	-0.143436	0.165111	1	havana	150268926	150269261	ENSMUSG00000100690	Gm4322		processed_pseudogene
ENSMUSG00000099447	5.39566	-0.27431	0.935486	-0.293227	0.769348		-0.0111918	0.190402	1	havana	150320681	150346771	ENSMUSG00000099447	2310030A07Rik	75584	antisense
ENSMUSG00000006010	923.713	-0.186962	0.146932	-1.27243	0.203219	0.48331	-0.126797	0.128553	1	ensembl_havana	150361305	150393080	ENSMUSG00000006010	Odr4	226499	protein_coding
ENSMUSG00000006005	18058.4	-0.113364	0.0783425	-1.44703	0.147887	0.403615	-0.098277	0.0742992	1	ensembl_havana	150392838	150449935	ENSMUSG00000006005	Tpr	108989	protein_coding
ENSMUSG00000006014	3.38065	0.986173	1.875	0.52596	0.598916		0.0103207	0.193407	1	ensembl_havana	150449412	150466165	ENSMUSG00000006014	Prg4	96875	protein_coding
ENSMUSG00000066842	32.5748	0.305786	0.370908	0.824427	0.409697	0.692419	0.0691704	0.184786	1	ensembl_havana	150562524	150993435	ENSMUSG00000066842	Hmcn1	545370	protein_coding
ENSMUSG00000097426	3.23814	3.95261	1.7657	2.23855	0.0251851		0.0470933	0.201633	1	havana	151136507	151137780	ENSMUSG00000097426	Gm8941		processed_pseudogene
ENSMUSG00000114694	1.6723	1.0087	1.85017	0.545191	0.585622		0.0110016	0.193391	1	havana	151198448	151199350	ENSMUSG00000114694	Gm47995	118567804	protein_coding
ENSMUSG00000100954	31.7332	-0.134472	0.426691	-0.315151	0.752647	0.903374	-0.0230372	0.178109	1	ensembl_havana	151339604	151345231	ENSMUSG00000100954	Gm10138		antisense
ENSMUSG00000023150	10590.2	0.123154	0.0783161	1.57253	0.115827	0.35477	0.108002	0.0745597	1	ensembl_havana	151344477	151364422	ENSMUSG00000023150	Ivns1abp	117198	protein_coding
ENSMUSG00000052748	1568.51	-0.029962	0.112497	-0.266336	0.789981	0.918212	-0.0236946	0.0975751	1	ensembl_havana	151367699	151428455	ENSMUSG00000052748	Swt1	66875	protein_coding
ENSMUSG00000053286	1262.66	-0.210719	0.167974	-1.25448	0.209669	0.491843	-0.130548	0.142739	1	ensembl_havana	151428542	151458161	ENSMUSG00000053286	Trmt1l	98685	protein_coding
ENSMUSG00000103928	53.6955	-0.219461	0.42589	-0.515301	0.606343	0.825942	-0.0380185	0.180816	1	havana	151445305	151447741	ENSMUSG00000103928	Gm37893		TEC
ENSMUSG00000026484	5666.43	-0.0387614	0.12764	-0.303678	0.761373	0.905752	-0.0266404	0.107064	1	ensembl_havana	151458004	151500955	ENSMUSG00000026484	Rnf2	19821	protein_coding
ENSMUSG00000103238	9.07061	-1.03221	0.650127	-1.58771	0.112352	0.348505	-0.0932887	0.217004	1	havana	151496557	151499585	ENSMUSG00000103238	Gm36527		TEC
ENSMUSG00000100551	1.94858	0.171799	1.34982	0.127276	0.898722		0.00352787	0.192031	1	havana	151520447	151520687	ENSMUSG00000100551	Gm19503		processed_pseudogene
ENSMUSG00000026483	1284.79	0.954548	0.215968	4.41986	9.87644e-06	0.000328211	0.856167	0.226978	1	ensembl_havana	151571186	151721939	ENSMUSG00000026483	Fam129a	63913	protein_coding
ENSMUSG00000100594	27.8309	-0.13707	0.412132	-0.332588	0.739445	0.898895	-0.0248305	0.177301	1	havana	151748949	151755018	ENSMUSG00000100594	2810414N06Rik	102640772	lincRNA
ENSMUSG00000043019	2151.67	0.0405388	0.0961639	0.42156	0.673347	0.863241	0.0319516	0.0864924	1	ensembl_havana	151755371	151822051	ENSMUSG00000043019	Edem3	66967	protein_coding
ENSMUSG00000032666	560.387	0.28817	0.149446	1.92825	0.0538236	0.220834	0.209805	0.142614	1	ensembl_havana	151852403	152090125	ENSMUSG00000032666	1700025G04Rik	69399	protein_coding
ENSMUSG00000014980	862.367	-0.010664	0.123204	-0.0865558	0.931025	0.974908	-0.0071625	0.104026	1	ensembl_havana	152370735	152386688	ENSMUSG00000014980	Tsen15	66637	protein_coding
ENSMUSG00000032649	2.98094	1.60381	1.1805	1.35858	0.17428		0.0450713	0.198911	1	ensembl_havana	152399830	152510695	ENSMUSG00000032649	Colgalt2	269132	protein_coding
ENSMUSG00000026482	102.767	0.378478	0.337841	1.12029	0.262592	0.552465	0.103642	0.195526	1	ensembl_havana	152516760	152766351	ENSMUSG00000026482	Rgl1	19731	protein_coding
ENSMUSG00000080950	24.4166	-0.249798	0.397343	-0.628672	0.529564	0.78159	-0.049146	0.181144	1	havana	152729159	152730559	ENSMUSG00000080950	Gm7278		processed_pseudogene
ENSMUSG00000008475	2812.17	-0.190785	0.122886	-1.55253	0.120535	0.361965	-0.14477	0.113277	1	ensembl_havana	152766542	152775597	ENSMUSG00000008475	Arpc5	67771	protein_coding
ENSMUSG00000026480	164.285	0.388576	0.293	1.3262	0.184775	0.458547	0.138046	0.203144	1	ensembl_havana	152800194	152836991	ENSMUSG00000026480	Ncf2	17970	protein_coding
ENSMUSG00000042772	8382.88	-0.108606	0.125476	-0.865549	0.386737	0.672512	-0.0778357	0.108817	1	ensembl_havana	152836995	152902646	ENSMUSG00000042772	Smg7	226517	protein_coding
ENSMUSG00000100394	2.64447	0.481228	1.44628	0.332735	0.739334		0.00854995	0.19253	1	havana	152878520	152880298	ENSMUSG00000100394	Gm28791		sense_intronic
ENSMUSG00000042751	1491.05	0.526608	0.133701	3.93869	8.19268e-05	0.00179331	0.470075	0.13787	1	ensembl_havana	152954993	153119261	ENSMUSG00000042751	Nmnat2	226518	protein_coding
ENSMUSG00000026479	574.736	-0.176208	0.299246	-0.588838	0.55597	0.795898	-0.053083	0.169225	1	ensembl_havana	153122756	153186447	ENSMUSG00000026479	Lamc2	16782	protein_coding
ENSMUSG00000026478	17698.4	0.442751	0.161213	2.74638	0.00602578	0.0490251	0.350731	0.166527	1	ensembl_havana	153218922	153332786	ENSMUSG00000026478	Lamc1	226519	protein_coding
ENSMUSG00000073538	179.975	0.655481	0.265015	2.47338	0.0133844	0.0884211	0.421926	0.301658	1	ensembl_havana	153404827	153414233	ENSMUSG00000073538	E330020D12Rik		processed_transcript
ENSMUSG00000042708	51.5596	-0.00354518	0.297746	-0.0119067	0.9905	0.995923	-0.000962252	0.162509	1	ensembl_havana	153425162	153452574	ENSMUSG00000042708	Shcbp1l	71836	protein_coding
ENSMUSG00000064435	2.75542	0.963904	1.26378	0.762713	0.445635		0.0224704	0.193615	1	ensembl	153440079	153440218	ENSMUSG00000064435	Gm25588	115487647	snoRNA
ENSMUSG00000103543	9.16416	0.210206	0.669182	0.314125	0.753426	0.903604	0.0164785	0.187218	1	havana	153443481	153444300	ENSMUSG00000103543	Gm37669		TEC
ENSMUSG00000042699	31386.6	-0.139255	0.0810567	-1.71799	0.0857977	0.29735	-0.121585	0.0773597	1	ensembl_havana	153455758	153487660	ENSMUSG00000042699	Dhx9	13211	protein_coding
ENSMUSG00000042684	838.407	0.819314	0.128863	6.35804	2.04338e-10	2.70087e-08	0.781597	0.131368	1	ensembl_havana	153503015	153550045	ENSMUSG00000042684	Npl	74091	protein_coding
ENSMUSG00000099858	19.1074	0.284763	0.528129	0.539193	0.589754	0.81704	0.0345267	0.185895	1	havana	153619604	153620673	ENSMUSG00000099858	Gm6652	626096	processed_pseudogene
ENSMUSG00000042671	6.88704	-0.531495	0.735248	-0.722878	0.469755		-0.0349781	0.191887	1	ensembl_havana	153653025	153700323	ENSMUSG00000042671	Rgs8	67792	protein_coding
ENSMUSG00000026475	102.278	-0.179461	0.231023	-0.776808	0.437272	0.712667	-0.0774021	0.158662	1	ensembl_havana	153740349	153745468	ENSMUSG00000026475	Rgs16	19734	protein_coding
ENSMUSG00000066800	7.5115	1.25769	0.783024	1.6062	0.10823		0.0792754	0.21137	1	ensembl_havana	153749426	153764221	ENSMUSG00000066800	Rnasel	24014	protein_coding
ENSMUSG00000045968	16.0526	-0.807681	0.601228	-1.34339	0.179147	0.450437	-0.0812347	0.207646	1	ensembl_havana	153849542	153900228	ENSMUSG00000045968	Teddm2	240817	protein_coding
ENSMUSG00000026473	11698.7	-0.223252	0.158779	-1.40606	0.159707	0.422355	-0.142798	0.13909	1	ensembl_havana	153899944	153909723	ENSMUSG00000026473	Glul	14645	protein_coding
ENSMUSG00000004110	21.212	0.229922	0.515778	0.445778	0.655758	0.853064	0.0289869	0.184202	1	ensembl_havana	154390731	154884501	ENSMUSG00000004110	Cacna1e	12290	protein_coding
ENSMUSG00000096950	3.4236	0.409617	1.14581	0.357491	0.720724		0.0115186	0.191735	1	havana	155063447	155083266	ENSMUSG00000096950	Gm9530	671336	lincRNA
ENSMUSG00000056708	159.988	0.0411174	0.214866	0.191363	0.848241	0.942426	0.0186841	0.144498	1	ensembl_havana	155096361	155099636	ENSMUSG00000056708	Ier5	15939	protein_coding
ENSMUSG00000026471	4.00426	-0.303223	0.95452	-0.317671	0.750735		-0.0119564	0.190613	1	ensembl_havana	155127277	155146814	ENSMUSG00000026471	Mr1	15064	protein_coding
ENSMUSG00000026470	918.564	-0.0784711	0.126086	-0.622362	0.533704	0.783547	-0.0567927	0.107677	1	ensembl_havana	155158715	155208256	ENSMUSG00000026470	Stx6	58244	protein_coding
ENSMUSG00000104181	5.41289	0.736509	0.934534	0.788103	0.430636		0.0308821	0.193424	1	havana	155179801	155180388	ENSMUSG00000104181	Gm8850		processed_pseudogene
ENSMUSG00000033722	67.5361	0.607421	0.269063	2.25754	0.0239742	0.132055	0.352296	0.296481	1	ensembl_havana	155212471	155244444	ENSMUSG00000033722	BC034090	207792	protein_coding
ENSMUSG00000026469	1049.77	0.392619	0.123248	3.18561	0.00144447	0.0163939	0.338544	0.125357	1	ensembl_havana	155275701	155417415	ENSMUSG00000026469	Xpr1	19775	protein_coding
ENSMUSG00000033701	1045.9	0.169365	0.104412	1.62208	0.104786	0.335108	0.137692	0.0978589	1	ensembl_havana	155558120	155691330	ENSMUSG00000033701	Acbd6	72482	protein_coding
ENSMUSG00000026468	2.92009	1.08809	1.27368	0.854292	0.392943		0.024972	0.194114	1	ensembl_havana	155698031	155751684	ENSMUSG00000026468	Lhx4	16872	protein_coding
ENSMUSG00000033684	213.169	0.462534	0.205975	2.24559	0.0247306	0.134434	0.309259	0.212505	1	ensembl_havana	155776029	155812889	ENSMUSG00000033684	Qsox1	104009	protein_coding
ENSMUSG00000033671	1019.22	0.0777051	0.102718	0.756489	0.449356	0.722899	0.0614767	0.0921929	1	ensembl_havana	155844964	155973255	ENSMUSG00000033671	Cep350	74081	protein_coding
ENSMUSG00000026466	466.409	0.109655	0.160418	0.683559	0.494254	0.757366	0.0669298	0.127923	1	ensembl_havana	156004599	156036480	ENSMUSG00000026466	Tor1aip1	208263	protein_coding
ENSMUSG00000102964	6.01879	0.418231	0.808602	0.517228	0.604997		0.0230665	0.190494	1	havana	156026223	156030007	ENSMUSG00000102964	9430034N14Rik		TEC
ENSMUSG00000050565	6413.02	-0.155313	0.13842	-1.12204	0.261846	0.551767	-0.107324	0.120287	1	ensembl_havana	156035403	156068861	ENSMUSG00000050565	Tor1aip2	240832	protein_coding
ENSMUSG00000015484	2.94243	2.10922	1.31659	1.60203	0.109148		0.0487668	0.20084	1	ensembl_havana	156075966	156205026	ENSMUSG00000015484	Fam163a	329274	protein_coding
ENSMUSG00000060985	145.8	-0.948395	0.273168	-3.47184	0.000516911	0.00760975	-0.777197	0.300491	1	ensembl_havana	156255296	156303664	ENSMUSG00000060985	Tdrd5	214575	protein_coding
ENSMUSG00000026601	8.30031	-1.3005	0.688967	-1.88761	0.0590782	0.234606	-0.109667	0.231274	1	ensembl_havana	156323509	156421159	ENSMUSG00000026601	Axdnd1	77352	protein_coding
ENSMUSG00000078193	293.25	-0.00314901	0.210417	-0.0149656	0.98806	0.995067	-0.00124216	0.142607	1	ensembl_havana	156366040	156366484	ENSMUSG00000078193	Gm2000	100038991	protein_coding
ENSMUSG00000026600	1548.53	-0.531142	0.177389	-2.99421	0.00275155	0.0270015	-0.426703	0.187265	1	ensembl_havana	156424525	156474331	ENSMUSG00000026600	Soat1	20652	protein_coding
ENSMUSG00000101523	104.201	-0.0433213	0.215203	-0.201304	0.840461	0.939313	-0.0193232	0.144651	1	havana	156524012	156526644	ENSMUSG00000101523	Csnk2a3	100039026	processed_pseudogene
ENSMUSG00000026596	3490.3	-0.178803	0.10459	-1.70956	0.087347	0.300457	-0.145553	0.0985229	1	ensembl_havana	156558786	156649568	ENSMUSG00000026596	Abl2	11352	protein_coding
ENSMUSG00000104293	7.28744	0.102802	0.888714	0.115675	0.90791		0.00478929	0.18959	1	havana	156583108	156588248	ENSMUSG00000104293	Gm38043		TEC
ENSMUSG00000060519	705.229	-0.582558	0.139512	-4.1757	2.97076e-05	0.00079541	-0.52399	0.144201	1	ensembl_havana	156653617	156674356	ENSMUSG00000060519	Tor3a	30935	protein_coding
ENSMUSG00000033557	1347.54	0.151931	0.10513	1.44518	0.148408	0.4042	0.122079	0.0974414	1	ensembl_havana	156678532	156719086	ENSMUSG00000033557	Fam20b	215015	protein_coding
ENSMUSG00000046057	5.2049	0.00103522	0.895376	0.00115618	0.999077		0.000140117	0.189582	1	ensembl_havana	156793512	156793844	ENSMUSG00000046057	Gm15428		processed_pseudogene
ENSMUSG00000026594	1725.96	-0.0628736	0.0965113	-0.651463	0.514747	0.772009	-0.0505628	0.0872458	1	ensembl_havana	156804166	156939626	ENSMUSG00000026594	Ralgps2	78255	protein_coding
ENSMUSG00000103303	4.33916	-0.553149	0.932579	-0.59314	0.553088		-0.02306	0.191853	1	havana	156856217	156858859	ENSMUSG00000103303	Gm37802		TEC
ENSMUSG00000102960	2.30373	-0.32108	1.2829	-0.250277	0.802373		-0.00714744	0.191977	1	havana	156872177	156876120	ENSMUSG00000102960	Gm37943		TEC
ENSMUSG00000026592	1.75721	1.13565	1.53868	0.738066	0.460474		0.0181309	0.193667	1	ensembl_havana	157099139	157108680	ENSMUSG00000026592	Tex35	73435	protein_coding
ENSMUSG00000070565	975.67	0.021642	0.0995924	0.217306	0.82797	0.934726	0.0172286	0.0886975	1	ensembl_havana	157135182	157412595	ENSMUSG00000070565	Rasal2	226525	protein_coding
ENSMUSG00000103808	2.25515	-1.50248	1.35742	-1.10686	0.268352		-0.0306624	0.19559	1	havana	157404325	157406721	ENSMUSG00000103808	Gm37060		TEC
ENSMUSG00000049881	1992.01	0.1567	0.138183	1.134	0.256794	0.54732	0.109076	0.120342	1	ensembl_havana	157412352	157420236	ENSMUSG00000049881	2810025M15Rik	69953	transcribed_processed_pseudogene
ENSMUSG00000033488	204.852	0.487603	0.370436	1.31629	0.188075	0.46326	0.120225	0.211725	1	ensembl_havana	157458577	157492638	ENSMUSG00000033488	Cryzl2	226527	protein_coding
ENSMUSG00000026589	5.48209	-0.0302079	0.816496	-0.036997	0.970487		-0.00151526	0.188729	1	ensembl_havana	157506728	157568425	ENSMUSG00000026589	Sec16b	89867	protein_coding
ENSMUSG00000004031	39.6172	-0.384229	0.341568	-1.1249	0.260633	0.550676	-0.103298	0.195901	1	ensembl_havana	158245269	158356326	ENSMUSG00000004031	Brinp2	240843	protein_coding
ENSMUSG00000026587	37.5515	-1.09547	0.384438	-2.84953	0.00437833	0.0385612	-0.745431	0.479853	1	ensembl_havana	158362273	158691781	ENSMUSG00000026587	Astn1	11899	protein_coding
ENSMUSG00000040782	3059.23	-0.0377738	0.0826218	-0.457189	0.647535	0.84906	-0.0319692	0.0762432	1	ensembl_havana	159232320	159347640	ENSMUSG00000040782	Cop1	26374	protein_coding
ENSMUSG00000103572	10.1646	-1.01561	0.690427	-1.47099	0.141294	0.393181	-0.0797706	0.209709	1	havana	159235710	159238558	ENSMUSG00000103572	Gm37115		TEC
ENSMUSG00000090394	3.17682	0.248344	1.26503	0.196315	0.844364		0.00581645	0.191839	1	ensembl_havana	160044382	160080208	ENSMUSG00000090394	4930523C07Rik	67647	protein_coding
ENSMUSG00000026725	8.68038	1.09974	0.895758	1.22772	0.21955	0.50408	0.0505815	0.199161	1	ensembl_havana	160085029	160153580	ENSMUSG00000026725	Tnn	329278	protein_coding
ENSMUSG00000058267	2143.01	0.286972	0.0891661	3.21839	0.00128911	0.0150994	0.258354	0.0888737	1	ensembl_havana	160195215	160202170	ENSMUSG00000058267	Mrps14	64659	protein_coding
ENSMUSG00000014226	19175.3	0.0271565	0.0750825	0.361689	0.717585	0.887707	0.0237354	0.0701203	1	ensembl_havana	160202367	160212875	ENSMUSG00000014226	Cacybp	12301	protein_coding
ENSMUSG00000103006	4.0126	-0.297446	0.948692	-0.313533	0.753876		-0.0118598	0.190559	1	havana	160212943	160214816	ENSMUSG00000103006	4933417C20Rik		TEC
ENSMUSG00000026721	532.757	0.128208	0.139952	0.916083	0.359623	0.647601	0.087276	0.118896	1	ensembl_havana	160219174	160793211	ENSMUSG00000026721	Rabgap1l	29809	protein_coding
ENSMUSG00000103632	14.8596	0.440307	0.520117	0.846555	0.397243	0.682242	0.0559348	0.191794	1	havana	160727734	160728160	ENSMUSG00000103632	Gm38329		TEC
ENSMUSG00000040423	1754.33	-0.10218	0.0874255	-1.16877	0.242496	0.531481	-0.0864166	0.0814674	1	ensembl_havana	160906418	160974978	ENSMUSG00000040423	Rc3h1	381305	protein_coding
ENSMUSG00000026715	7.66314	0.543254	0.713606	0.76128	0.44649		0.0383961	0.19229	1	ensembl_havana	160978585	161005863	ENSMUSG00000026715	Serpinc1	11905	protein_coding
ENSMUSG00000043467	897.099	-0.0879656	0.135105	-0.651092	0.514987	0.772166	-0.0599934	0.113357	1	ensembl_havana	161002922	161034849	ENSMUSG00000043467	Zbtb37	240869	protein_coding
ENSMUSG00000053332	7766.19	-0.394646	0.0942596	-4.18679	2.82923e-05	0.000765585	-0.362958	0.095392	1	havana	161034422	161038539	ENSMUSG00000053332	Gas5	14455	processed_transcript
ENSMUSG00000026709	1765.59	-0.165629	0.159758	-1.03675	0.299851	0.590121	-0.102758	0.132738	1	ensembl_havana	161040601	161070658	ENSMUSG00000026709	Dars2	226539	protein_coding
ENSMUSG00000102864	2.42645	0.259584	1.18904	0.218314	0.827184		0.00681233	0.191593	1	havana	161040620	161041414	ENSMUSG00000102864	Gm37634		antisense
ENSMUSG00000026708	776.214	-0.0363022	0.109315	-0.332089	0.739822	0.899039	-0.0284701	0.0955892	1	ensembl_havana	161070713	161086724	ENSMUSG00000026708	Cenpl	70454	protein_coding
ENSMUSG00000026705	1027.89	-0.108491	0.099505	-1.09031	0.275577	0.564981	-0.0874766	0.091041	1	ensembl_havana	161088375	161131511	ENSMUSG00000026705	Klhl20	226541	protein_coding
ENSMUSG00000044835	383.199	-0.154402	0.164158	-0.94057	0.346925	0.635995	-0.0937655	0.133742	1	ensembl_havana	161142691	161170498	ENSMUSG00000044835	Ankrd45	73844	protein_coding
ENSMUSG00000102817	3.86887	0.41613	1.03653	0.401466	0.688077		0.0142488	0.191391	1	havana	161176936	161237307	ENSMUSG00000102817	Gm6185	620839	transcribed_unprocessed_pseudogene
ENSMUSG00000026701	13469.4	-0.44726	0.160465	-2.78727	0.00531537	0.0445278	-0.353054	0.16581	1	ensembl_havana	161240112	161251219	ENSMUSG00000026701	Prdx6	11758	protein_coding
ENSMUSG00000026700	4.65238	1.38758	0.959621	1.44596	0.148187		0.0582004	0.202637	1	ensembl_havana	161395409	161418410	ENSMUSG00000026700	Tnfsf4	22164	protein_coding
ENSMUSG00000066755	2.52851	-0.0369985	1.52399	-0.0242774	0.980631		-0.000540695	0.192403	1	ensembl_havana	161494655	161505290	ENSMUSG00000066755	Tnfsf18	240873	protein_coding
ENSMUSG00000040323	28.4889	0.577564	0.372608	1.55006	0.121128	0.362724	0.151708	0.235274	1	ensembl_havana	161726242	161727489	ENSMUSG00000040323	Gm15429		processed_pseudogene
ENSMUSG00000000817	2.21298	-0.0236028	1.46712	-0.0160879	0.987164		-0.000356105	0.1923	1	ensembl_havana	161780689	161788495	ENSMUSG00000000817	Fasl	14103	protein_coding
ENSMUSG00000040297	2059.71	-0.0747147	0.0933835	-0.800084	0.423662	0.702217	-0.0611234	0.0852534	1	ensembl_havana	161816114	161876682	ENSMUSG00000040297	Suco	226551	protein_coding
ENSMUSG00000103158	9.77544	0.375298	0.62941	0.596271	0.550994	0.793407	0.0331699	0.189072	1	havana	161890458	161903173	ENSMUSG00000103158	Gm31925		lincRNA
ENSMUSG00000026698	231.679	-0.0387037	0.166467	-0.2325	0.81615	0.929546	-0.0222302	0.126834	1	ensembl_havana	161969186	161973435	ENSMUSG00000026698	Pigc	67292	protein_coding
ENSMUSG00000040265	5.42831	-0.637984	0.917901	-0.695047	0.487026		-0.0273188	0.192543	1	ensembl_havana	161982453	162478034	ENSMUSG00000040265	Dnm3	103967	protein_coding
ENSMUSG00000026694	1491.83	-0.0273856	0.173076	-0.158229	0.874277	0.952733	-0.0152468	0.129404	1	ensembl_havana	162532127	162548551	ENSMUSG00000026694	Eef1aknmt	71449	protein_coding
ENSMUSG00000026696	520.018	0.113691	0.171563	0.662678	0.507537	0.766479	0.0655363	0.13317	1	ensembl_havana	162570515	162599084	ENSMUSG00000026696	Vamp4	53330	protein_coding
ENSMUSG00000040225	19535	-0.151245	0.0820609	-1.84308	0.0653168	0.249741	-0.132307	0.0785912	1	ensembl_havana	162670725	162740556	ENSMUSG00000040225	Prrc2c	226562	protein_coding
ENSMUSG00000098259	21.3989	-0.970834	0.457642	-2.12138	0.0338897	0.163944	-0.222749	0.353088	1	ensembl	162674158	162674220	ENSMUSG00000098259	Gm27616		miRNA
ENSMUSG00000026692	4.07863	0.313972	1.17524	0.267156	0.789349		0.00846337	0.191631	1	ensembl_havana	162793188	162813972	ENSMUSG00000026692	Fmo4	226564	protein_coding
ENSMUSG00000040124	471.607	0.0507223	0.117622	0.431231	0.6663	0.858313	0.0373498	0.101304	1	ensembl_havana	163384908	163403669	ENSMUSG00000040124	Gorab	98376	protein_coding
ENSMUSG00000102117	9.25473	-0.842245	0.685957	-1.22784	0.219507	0.504049	-0.0652153	0.201785	1	havana	163623793	163624678	ENSMUSG00000102117	Rpsa-ps1	665237	processed_pseudogene
ENSMUSG00000026585	2666.03	-0.17433	0.0855143	-2.0386	0.0414897	0.185994	-0.151676	0.0823196	1	ensembl_havana	163779583	163917109	ENSMUSG00000026585	Kifap3	16579	protein_coding
ENSMUSG00000026584	896.953	0.00566615	0.108399	0.0522713	0.958313	0.98485	0.00411766	0.0946347	1	ensembl_havana	163929100	163955126	ENSMUSG00000026584	Scyl3	240880	protein_coding
ENSMUSG00000041406	3853.52	0.047796	0.0900542	0.530747	0.595594	0.819974	0.0401073	0.0821316	1	ensembl_havana	163945993	163994796	ENSMUSG00000041406	BC055324	381306	protein_coding
ENSMUSG00000041396	482.912	-0.274714	0.115143	-2.38584	0.0170401	0.104311	-0.227095	0.112979	1	ensembl_havana	163994889	163997243	ENSMUSG00000041396	Mettl18	69962	protein_coding
ENSMUSG00000026581	3.38495	2.36762	1.37746	1.71883	0.085645		0.0489524	0.201293	1	ensembl_havana	164061982	164084181	ENSMUSG00000026581	Sell	20343	protein_coding
ENSMUSG00000026580	7.62634	0.389445	0.802205	0.485469	0.627344		0.0218403	0.190217	1	ensembl_havana	164115264	164150026	ENSMUSG00000026580	Selp	20344	protein_coding
ENSMUSG00000026579	69.2359	-1.31971	0.357102	-3.6956	0.000219367	0.00387142	-1.10094	0.393234	1	ensembl_havana	164151838	164220277	ENSMUSG00000026579	F5	14067	protein_coding
ENSMUSG00000040918	3094.67	-0.0976475	0.121282	-0.805127	0.420746	0.700286	-0.0712353	0.105552	1	ensembl_havana	164249046	164265385	ENSMUSG00000040918	Slc19a2	116914	protein_coding
ENSMUSG00000026578	206.505	-0.631611	0.164796	-3.83269	0.000126747	0.00253539	-0.55255	0.172373	1	ensembl_havana	164275585	164287847	ENSMUSG00000026578	Ccdc181	74895	protein_coding
ENSMUSG00000026577	1202.15	-0.116461	0.112828	-1.03219	0.301982	0.592414	-0.0890616	0.101018	1	ensembl_havana	164289800	164307489	ENSMUSG00000026577	Blzf1	66352	protein_coding
ENSMUSG00000026575	1149.36	-0.12865	0.104646	-1.22938	0.218928	0.503323	-0.102355	0.0958168	1	ensembl_havana	164304121	164437725	ENSMUSG00000026575	Nme7	171567	protein_coding
ENSMUSG00000103493	2.48247	-0.126609	1.17489	-0.107762	0.914184		-0.0033048	0.191418	1	havana	164424713	164426994	ENSMUSG00000103493	Gm37411		TEC
ENSMUSG00000026576	3315.03	0.524805	0.099666	5.26564	1.39702e-07	8.69746e-06	0.492326	0.101351	1	ensembl_havana	164437109	164458355	ENSMUSG00000026576	Atp1b1	11931	protein_coding
ENSMUSG00000104011	14.1896	0.901699	0.573822	1.57139	0.116092	0.3552	0.105209	0.222135	1	havana	164462442	164463989	ENSMUSG00000104011	Gm32391		lincRNA
ENSMUSG00000097281	21.0765	0.814698	0.534045	1.52552	0.127129	0.370841	0.107359	0.221529	1	havana	164503309	164514882	ENSMUSG00000097281	Gm26685	102635083	lincRNA
ENSMUSG00000102389	4.60879	1.65667	1.0993	1.50703	0.131803		0.0521027	0.201329	1	havana	164575455	164578553	ENSMUSG00000102389	D630023O14Rik		TEC
ENSMUSG00000040848	1154.81	0.00949392	0.145574	0.0652171	0.948001	0.981709	0.00623493	0.116455	1	ensembl_havana	165174337	165194438	ENSMUSG00000040848	Sft2d2	108735	protein_coding
ENSMUSG00000040843	2019.96	0.0132674	0.107309	0.123637	0.901603	0.965516	0.0102195	0.0939406	1	ensembl_havana	165212286	165236996	ENSMUSG00000040843	Tiprl	226591	protein_coding
ENSMUSG00000102302	57.28	-0.16229	0.281717	-0.576076	0.564564	0.801132	-0.0533616	0.16588	1	havana	165230371	165235125	ENSMUSG00000102302	Gm38190		sense_intronic
ENSMUSG00000040836	202.559	0.102009	0.208883	0.488354	0.625299	0.836763	0.0477947	0.145565	1	ensembl_havana	165295789	165326745	ENSMUSG00000040836	Gpr161	240888	protein_coding
ENSMUSG00000026571	734.929	0.245814	0.119813	2.05164	0.0402043	0.182229	0.196371	0.115233	1	ensembl_havana	165328698	165460475	ENSMUSG00000026571	Dcaf6	74106	protein_coding
ENSMUSG00000102401	2.15537	-0.0964519	1.32648	-0.0727128	0.942035		-0.00197295	0.191941	1	havana	165451555	165454629	ENSMUSG00000102401	Gm37864		sense_intronic
ENSMUSG00000026568	311.332	0.288848	0.137752	2.09687	0.0360048	0.169499	0.221426	0.133489	1	ensembl_havana	165460637	165481214	ENSMUSG00000026568	Mpc2	70456	protein_coding
ENSMUSG00000103763	2.25238	-1.57455	1.75205	-0.898691	0.368817		-0.0186547	0.19423	1	havana	165467500	165468533	ENSMUSG00000103763	Gm37860		TEC
ENSMUSG00000026567	5.55056	-0.385403	1.00466	-0.383616	0.701263		-0.0138236	0.191156	1	ensembl_havana	165485183	165576774	ENSMUSG00000026567	Adcy10	271639	protein_coding
ENSMUSG00000026566	1951.73	0.229854	0.0922472	2.49171	0.0127128	0.0853901	0.200453	0.0902556	1	ensembl_havana	165592240	165634538	ENSMUSG00000026566	Mpzl1	68481	protein_coding
ENSMUSG00000103098	2.8957	2.09933	1.31796	1.59287	0.11119		0.0486032	0.200773	1	havana	165613059	165613890	ENSMUSG00000103098	Gm37559		processed_pseudogene
ENSMUSG00000040723	316.665	1.54072	0.581992	2.64732	0.00811322	0.0615766	0.242392	0.482766	1	ensembl_havana	165646516	165709757	ENSMUSG00000040723	Rcsd1	226594	protein_coding
ENSMUSG00000040713	232.552	0.403264	0.232134	1.7372	0.0823512	0.290205	0.213007	0.210213	1	ensembl_havana	165763746	165775308	ENSMUSG00000040713	Creg1	433375	protein_coding
ENSMUSG00000089829	4.016	-0.317665	1.0293	-0.308623	0.757609		-0.0108146	0.191054	1	havana	165781075	165789367	ENSMUSG00000089829	Gm16565		processed_transcript
ENSMUSG00000026565	4459.33	-0.334871	0.134296	-2.49353	0.0126479	0.0851603	-0.269082	0.134009	1	ensembl_havana	165865154	166002678	ENSMUSG00000026565	Pou2f1	18986	protein_coding
ENSMUSG00000026564	2103.09	-0.343325	0.180084	-1.90647	0.0565897	0.228098	-0.226625	0.172078	1	ensembl_havana	166098148	166127922	ENSMUSG00000026564	Dusp27	240892	protein_coding
ENSMUSG00000000544	2141.75	-0.488872	0.0891307	-5.48489	4.13729e-08	3.05112e-06	-0.463151	0.0903256	1	ensembl_havana	166130238	166166510	ENSMUSG00000000544	Gpa33	59290	protein_coding
ENSMUSG00000040629	611.582	0.000602972	0.546298	0.00110374	0.999119	0.99967	0.000733291	0.182775	1	ensembl_havana	166201201	166238747	ENSMUSG00000040629	Mael	98558	protein_coding
ENSMUSG00000040612	46.5591	-0.562768	0.348986	-1.61258	0.106836	0.338176	-0.166924	0.242033	1	ensembl_havana	166254139	166316823	ENSMUSG00000040612	Ildr2	100039795	protein_coding
ENSMUSG00000026563	248.525	-0.421138	0.17017	-2.47481	0.0133307	0.0881686	-0.316389	0.17435	1	ensembl_havana	166379097	166393621	ENSMUSG00000026563	Tada1	27878	protein_coding
ENSMUSG00000040596	78.8871	-0.985303	0.268327	-3.67203	0.000240635	0.00416399	-0.828512	0.290948	1	ensembl_havana	166384622	166409863	ENSMUSG00000040596	Pogk	71592	protein_coding
ENSMUSG00000084093	7.41145	-0.729765	0.737467	-0.989557	0.322391		-0.0485223	0.195986	1	havana	166431705	166431875	ENSMUSG00000084093	Gm16418		processed_pseudogene
ENSMUSG00000086925	26.8821	-0.0361231	0.39809	-0.090741	0.927698	0.974071	-0.0067786	0.174479	1	havana	166945597	166946358	ENSMUSG00000086925	Gm6286	622102	processed_pseudogene
ENSMUSG00000097823	3.74273	-0.82373	1.06917	-0.770442	0.441038		-0.0263213	0.193459	1	havana	166998295	167000841	ENSMUSG00000097823	Gm16701		lincRNA
ENSMUSG00000060568	41.2836	0.525032	0.330429	1.58894	0.112074	0.347927	0.17013	0.237571	1	ensembl_havana	167001417	167091302	ENSMUSG00000060568	Fam78b	226610	protein_coding
ENSMUSG00000026558	8674.07	-0.034866	0.0914204	-0.381381	0.70292	0.88072	-0.0285195	0.0829361	1	ensembl_havana	167222883	167285320	ENSMUSG00000026558	Uck2	80914	protein_coding
ENSMUSG00000052428	1921.59	0.13521	0.12622	1.07122	0.28407	0.57338	0.0984442	0.111156	1	ensembl_havana	167308378	167333978	ENSMUSG00000052428	Tmco1	68944	protein_coding
ENSMUSG00000088246	7.99559	-0.566155	0.729756	-0.775814	0.437859	0.713027	-0.0378979	0.192547	1	ensembl	167340369	167340424	ENSMUSG00000088246	Gm25911		miRNA
ENSMUSG00000026687	5035.82	-0.0324416	0.109035	-0.297533	0.76606	0.908244	-0.0233611	0.0952871	1	ensembl_havana	167349991	167368532	ENSMUSG00000026687	Aldh9a1	56752	protein_coding
ENSMUSG00000026688	449.591	0.471867	0.120339	3.92115	8.81271e-05	0.00189523	0.423867	0.123214	1	ensembl_havana	167371966	167393841	ENSMUSG00000026688	Mgst3	66447	protein_coding
ENSMUSG00000015843	45.5172	-1.54657	0.431892	-3.58091	0.000342401	0.00548832	-1.26482	0.483143	1	ensembl_havana	167598384	167639623	ENSMUSG00000015843	Rxrg	20183	protein_coding
ENSMUSG00000026686	23.1745	0.407594	0.550094	0.740953	0.458722	0.731366	0.0463552	0.189997	1	ensembl_havana	167689237	167848741	ENSMUSG00000026686	Lmx1a	110648	protein_coding
ENSMUSG00000052534	627.43	-0.313202	0.129296	-2.42236	0.0154202	0.0976293	-0.252697	0.128032	1	ensembl_havana	168119364	168432270	ENSMUSG00000052534	Pbx1	18514	protein_coding
ENSMUSG00000026683	1927.34	-0.00456029	0.0907118	-0.0502723	0.959905	0.985485	-0.00367659	0.0821683	1	ensembl_havana	169497934	169531464	ENSMUSG00000026683	Nuf2	66977	protein_coding
ENSMUSG00000026678	6.79495	0.869212	0.869298	0.999902	0.317358		0.0423158	0.195868	1	ensembl_havana	169655501	169695813	ENSMUSG00000026678	Rgs5	19737	protein_coding
ENSMUSG00000070532	8.98482	-0.0451242	0.822232	-0.0548801	0.956234	0.984447	-0.00226311	0.188778	1	ensembl_havana	169928648	169934653	ENSMUSG00000070532	Ccdc190	78465	protein_coding
ENSMUSG00000026675	637.257	0.222138	0.180371	1.23156	0.218113	0.502594	0.130526	0.15008	1	ensembl_havana	169949535	169969241	ENSMUSG00000026675	Hsd17b7	15490	protein_coding
ENSMUSG00000097503	3.56675	-0.0828493	1.05391	-0.0786114	0.937342		-0.00265056	0.190776	1	havana	169969409	169972396	ENSMUSG00000097503	3110045C21Rik	67303	antisense
ENSMUSG00000026674	385.758	1.5602	0.257292	6.06392	1.32846e-09	1.46326e-07	1.47396	0.264705	1	ensembl_havana	169972307	170110762	ENSMUSG00000026674	Ddr2	18214	protein_coding
ENSMUSG00000026670	1215.67	0.0664111	0.107908	0.615444	0.538262	0.785855	0.0512628	0.0954143	1	ensembl_havana	170141938	170174957	ENSMUSG00000026670	Uap1	107652	protein_coding
ENSMUSG00000026667	2178.09	-0.0178916	0.106236	-0.168413	0.866258	0.949768	-0.0136869	0.0932495	1	ensembl_havana	170193420	170215397	ENSMUSG00000026667	Uhmk1	16589	protein_coding
ENSMUSG00000102752	11.6137	0.51058	0.629368	0.811259	0.417217	0.698269	0.0456445	0.192451	1	ensembl_havana	170298199	170306332	ENSMUSG00000102752	Gm7694	665574	protein_coding
ENSMUSG00000038473	11.0998	0.319299	0.696106	0.458694	0.646454	0.848524	0.0234102	0.188727	1	ensembl_havana	170302668	170589861	ENSMUSG00000038473	Nos1ap	70729	protein_coding
ENSMUSG00000102193	8.42559	0.370843	0.690091	0.537382	0.591004	0.817124	0.0275949	0.189342	1	havana	170630921	170631501	ENSMUSG00000102193	Gm7299	640532	processed_pseudogene
ENSMUSG00000038463	22.2561	0.907727	0.509654	1.78107	0.0749017	0.273256	0.13994	0.248645	1	ensembl_havana	170644532	170682789	ENSMUSG00000038463	Olfml2b	320078	protein_coding
ENSMUSG00000026663	2027.15	0.250773	0.0825982	3.03605	0.00239696	0.0244434	0.226422	0.0817677	1	ensembl_havana	170704674	170867771	ENSMUSG00000026663	Atf6	226641	protein_coding
ENSMUSG00000053925	3.90927	-0.677019	1.01088	-0.66973	0.50303		-0.0240711	0.192655	1	havana	170868645	170881721	ENSMUSG00000053925	Gm9929		processed_transcript
ENSMUSG00000026659	1053.05	0.108053	0.124582	0.867324	0.385765	0.671726	0.0786521	0.108309	1	ensembl_havana	170873498	170885540	ENSMUSG00000026659	Dusp12	80915	protein_coding
ENSMUSG00000096968	6.78681	1.25272	0.868861	1.4418	0.14936		0.0629365	0.203983	1	ensembl	170885065	170885881	ENSMUSG00000096968	Gm26620		protein_coding
ENSMUSG00000089838	10.3673	0.526012	0.617357	0.852039	0.394192	0.678902	0.0489056	0.193136	1	havana	170925309	170925644	ENSMUSG00000089838	Gm2962		processed_pseudogene
ENSMUSG00000026656	90.3106	0.413002	0.337435	1.22394	0.220973	0.505995	0.115829	0.202136	1	ensembl_havana	170958617	170976547	ENSMUSG00000026656	Fcgr2b	14130	protein_coding
ENSMUSG00000103676	3.50892	0.486474	1.0621	0.458031	0.64693		0.015924	0.191723	1	havana	170973373	170977746	ENSMUSG00000103676	Gm38204		antisense
ENSMUSG00000104340	54.0966	-0.292884	0.476631	-0.614488	0.538893	0.786083	-0.0417453	0.185086	1	havana	170981944	170986466	ENSMUSG00000104340	Gm10522		lincRNA
ENSMUSG00000059498	2.42688	0.286113	1.33259	0.214705	0.829997		0.00601333	0.19207	1	ensembl_havana	171051174	171064935	ENSMUSG00000059498	Fcgr3	14131	protein_coding
ENSMUSG00000026649	16.368	0.164621	0.512675	0.321103	0.748132	0.90161	0.0208857	0.182782	1	ensembl_havana	171113918	171126967	ENSMUSG00000026649	Cfap126	75472	protein_coding
ENSMUSG00000058076	3210.7	0.111134	0.0844819	1.31548	0.188348	0.463598	0.0950859	0.0793642	1	ensembl_havana	171127165	171150603	ENSMUSG00000058076	Sdhc	66052	protein_coding
ENSMUSG00000056569	6.58247	0.619265	0.785391	0.788481	0.430416		0.0364537	0.193022	1	ensembl_havana	171150711	171161130	ENSMUSG00000056569	Mpz	17528	protein_coding
ENSMUSG00000038370	17.9329	0.0327363	0.528235	0.061973	0.950584	0.98202	0.00404837	0.182111	1	ensembl_havana	171173262	171196268	ENSMUSG00000038370	Pcp4l1	66425	protein_coding
ENSMUSG00000005677	2.02551	1.39746	1.48396	0.941714	0.346339		0.0241182	0.194511	1	ensembl_havana	171213970	171220701	ENSMUSG00000005677	Nr1i3	12355	protein_coding
ENSMUSG00000005674	823.8	-0.0653871	0.127672	-0.512147	0.608548	0.826811	-0.0458347	0.107946	1	ensembl_havana	171216011	171222514	ENSMUSG00000005674	Tomm40l	641376	protein_coding
ENSMUSG00000005681	3.08836	1.26144	1.29764	0.972109	0.330996		0.0280655	0.194833	1	ensembl_havana	171225054	171226379	ENSMUSG00000005681	Apoa2	11807	protein_coding
ENSMUSG00000058715	3.39077	0.376976	1.0706	0.352118	0.72475		0.0121198	0.191385	1	ensembl_havana	171229572	171234365	ENSMUSG00000058715	Fcer1g	14127	protein_coding
ENSMUSG00000013593	4490.64	0.0543913	0.0814382	0.667885	0.504207	0.763912	0.0465193	0.0755563	1	ensembl_havana	171234853	171251388	ENSMUSG00000013593	Ndufs2	226646	protein_coding
ENSMUSG00000006403	51.9208	-0.00516721	0.313267	-0.0164946	0.98684	0.994538	-0.00116555	0.164894	1	ensembl_havana	171250421	171260637	ENSMUSG00000006403	Adamts4	240913	protein_coding
ENSMUSG00000052423	969.053	0.32092	0.1103	2.90952	0.00361987	0.0333693	0.276686	0.110388	1	ensembl_havana	171270328	171276896	ENSMUSG00000052423	B4galt3	57370	protein_coding
ENSMUSG00000062729	587.461	-0.148493	0.136806	-1.08543	0.277732	0.566999	-0.103374	0.118753	1	ensembl_havana	171275990	171281186	ENSMUSG00000062729	Ppox	19044	protein_coding
ENSMUSG00000053483	1401.07	0.107885	0.11573	0.932209	0.351228	0.639799	0.0815045	0.102534	1	ensembl_havana	171281945	171287991	ENSMUSG00000053483	Usp21	30941	protein_coding
ENSMUSG00000062963	1528.83	0.203547	0.141343	1.4401	0.14984	0.406553	0.143925	0.127122	1	ensembl_havana	171288563	171295024	ENSMUSG00000062963	Ufc1	66155	protein_coding
ENSMUSG00000079137	3.00497	-0.623066	1.35448	-0.460004	0.645513		-0.0124536	0.192615	1	havana	171305087	171305494	ENSMUSG00000079137	Rpl27-ps1		processed_pseudogene
ENSMUSG00000103983	37.4762	-0.324705	0.356609	-0.910536	0.36254	0.650745	-0.0784693	0.186694	1	havana	171320601	171326177	ENSMUSG00000103983	Gm20045		lincRNA
ENSMUSG00000013973	959.437	-0.227161	0.09967	-2.27913	0.0226593	0.127783	-0.192953	0.0968286	1	ensembl_havana	171329145	171342331	ENSMUSG00000013973	Dedd	21945	protein_coding
ENSMUSG00000013997	639.664	-0.395884	0.113134	-3.49925	0.000466568	0.00703841	-0.350793	0.114956	1	ensembl_havana	171338008	171345646	ENSMUSG00000013997	Nit1	27045	protein_coding
ENSMUSG00000006412	2569.18	0.0443108	0.0888564	0.498679	0.618005	0.831899	0.0367939	0.0811525	1	ensembl_havana	171345670	171359254	ENSMUSG00000006412	Pfdn2	18637	protein_coding
ENSMUSG00000102929	51.2204	-0.0586016	0.319987	-0.183137	0.85469	0.94525	-0.0157414	0.166503	1	havana	171354126	171355415	ENSMUSG00000102929	Gm37154		TEC
ENSMUSG00000045259	7.8741	-0.777608	0.752684	-1.03311	0.301551		-0.0498273	0.196747	1	ensembl_havana	171358446	171360798	ENSMUSG00000045259	Klhdc9	68874	protein_coding
ENSMUSG00000006411	117.164	0.139924	0.239457	0.584338	0.558993	0.797647	0.0570516	0.156535	1	ensembl_havana	171370099	171388598	ENSMUSG00000006411	Nectin4	71740	protein_coding
ENSMUSG00000048865	1102.05	-0.0322423	0.122499	-0.263205	0.792392	0.919047	-0.0229724	0.103883	1	ensembl_havana	171388954	171410298	ENSMUSG00000048865	Arhgap30	226652	protein_coding
ENSMUSG00000026641	2464	-0.139425	0.104008	-1.34052	0.180077	0.45165	-0.111688	0.095886	1	ensembl_havana	171411313	171419142	ENSMUSG00000026641	Usf1	22278	protein_coding
ENSMUSG00000103711	59.6494	-0.268932	0.296532	-0.906922	0.364448	0.652324	-0.0856961	0.178855	1	ensembl_havana	171418872	171420352	ENSMUSG00000103711	Tstd1	226654	protein_coding
ENSMUSG00000038235	2088.53	-0.263082	0.121676	-2.16216	0.0306059	0.153914	-0.210561	0.117985	1	ensembl_havana	171437535	171464603	ENSMUSG00000038235	F11r	16456	protein_coding
ENSMUSG00000091993	2.54108	-1.42722	1.62374	-0.878971	0.379417		-0.0198168	0.194197	1	ensembl_havana	171500568	171504111	ENSMUSG00000091993	B930036N10Rik		antisense
ENSMUSG00000060244	58.6764	-0.126761	0.26198	-0.483859	0.628486	0.838597	-0.0455129	0.160033	1	ensembl_havana	171503478	171504750	ENSMUSG00000060244	Alyref2	56009	protein_coding
ENSMUSG00000059058	626.056	-0.238774	0.114196	-2.09091	0.0365357	0.171061	-0.193631	0.11002	1	havana	171711088	171711282	ENSMUSG00000059058	Tma7-ps		processed_pseudogene
ENSMUSG00000015314	5.92782	1.86663	0.983169	1.89859	0.0576185		0.076238	0.212513	1	ensembl_havana	171917515	171953170	ENSMUSG00000015314	Slamf6	30925	protein_coding
ENSMUSG00000026556	1316.34	-0.231026	0.126762	-1.82252	0.0683758	0.256809	-0.177228	0.119604	1	ensembl_havana	172000960	172028444	ENSMUSG00000026556	Vangl2	93840	protein_coding
ENSMUSG00000051251	1.56943	0.206323	1.69612	0.121644	0.903181		0.00271172	0.192726	1	ensembl_havana	172052292	172057573	ENSMUSG00000051251	Nhlh1	18071	protein_coding
ENSMUSG00000003458	1444.2	-0.138391	0.162368	-0.852328	0.394032	0.678898	-0.0844568	0.13132	1	ensembl_havana	172066013	172082795	ENSMUSG00000003458	Ncstn	59287	protein_coding
ENSMUSG00000026553	7541.94	0.0481306	0.0734052	0.655683	0.512028	0.770014	0.042215	0.0689469	1	ensembl_havana	172082529	172122330	ENSMUSG00000026553	Copa	12847	protein_coding
ENSMUSG00000003464	2636.55	-0.0208068	0.0935524	-0.222408	0.823996	0.933135	-0.016841	0.0843543	1	ensembl_havana	172126755	172136493	ENSMUSG00000003464	Pex19	19298	protein_coding
ENSMUSG00000089803	13.3204	-0.234548	0.540117	-0.434254	0.664104	0.857159	-0.0268572	0.184909	1	havana	172144274	172144901	ENSMUSG00000089803	Gm10171		processed_pseudogene
ENSMUSG00000026554	2656.41	-0.192729	0.119484	-1.61301	0.106743	0.338034	-0.14864	0.110944	1	ensembl_havana	172148084	172197005	ENSMUSG00000026554	Dcaf8	98193	protein_coding
ENSMUSG00000013698	521.598	-0.349579	0.185168	-1.88791	0.0590387	0.234503	-0.226246	0.176378	1	ensembl_havana	172196728	172206804	ENSMUSG00000013698	Pea15a	18611	protein_coding
ENSMUSG00000007122	65.4147	0.371647	0.456706	0.813756	0.415785	0.69711	0.0591224	0.189308	1	ensembl_havana	172209894	172219868	ENSMUSG00000007122	Casq1	12372	protein_coding
ENSMUSG00000007107	12.6471	0.0938849	0.723043	0.129847	0.896688	0.964047	0.00645792	0.187475	1	ensembl_havana	172223513	172258414	ENSMUSG00000007107	Atp1a4	27222	protein_coding
ENSMUSG00000038034	551.204	0.360629	0.173825	2.07466	0.0380179	0.175561	0.251204	0.170623	1	ensembl_havana	172261641	172319841	ENSMUSG00000038034	Igsf8	140559	protein_coding
ENSMUSG00000007097	23.2354	0.911309	0.568022	1.60436	0.108636	0.341799	0.107873	0.224339	1	ensembl_havana	172271709	172298064	ENSMUSG00000007097	Atp1a2	98660	protein_coding
ENSMUSG00000038026	14.2581	-1.38394	0.56896	-2.43239	0.0149994	0.0959106	-0.228112	0.411471	1	ensembl_havana	172320501	172329318	ENSMUSG00000038026	Kcnj9	16524	protein_coding
ENSMUSG00000044708	132.114	0.120848	0.223675	0.540287	0.588999	0.816587	0.0530866	0.151187	1	ensembl_havana	172341210	172374085	ENSMUSG00000044708	Kcnj10	16513	protein_coding
ENSMUSG00000050229	1791.6	-0.187056	0.101903	-1.83563	0.0664119	0.252356	-0.15454	0.0967937	1	ensembl_havana	172376546	172384099	ENSMUSG00000050229	Pigm	67556	protein_coding
ENSMUSG00000102278	12.3725	0.829954	0.690237	1.20242	0.229201	0.514886	0.0637109	0.201197	1	havana	172388234	172390989	ENSMUSG00000102278	Gm37145		TEC
ENSMUSG00000103357	14.0548	2.27248	0.836637	2.71621	0.00660345	0.0522408	0.136868	0.267506	1	havana	172458569	172474969	ENSMUSG00000103357	Gm7804		transcribed_processed_pseudogene
ENSMUSG00000026548	88.4874	2.3658	0.439603	5.38168	7.37947e-08	4.89581e-06	2.1937	0.457193	1	ensembl_havana	172475358	172478575	ENSMUSG00000026548	Slamf9	98365	protein_coding
ENSMUSG00000037995	1710.52	-0.169855	0.104995	-1.61774	0.105719	0.336277	-0.137368	0.0983261	1	ensembl_havana	172481788	172498878	ENSMUSG00000037995	Igsf9	93842	protein_coding
ENSMUSG00000026547	4596.89	0.641959	0.115828	5.54235	2.9844e-08	2.28933e-06	0.605123	0.118224	1	ensembl_havana	172500047	172507380	ENSMUSG00000026547	Tagln2	21346	protein_coding
ENSMUSG00000104351	3.02569	0.400914	1.36269	0.294208	0.768599		0.00804662	0.192274	1	havana	172513249	172514807	ENSMUSG00000104351	Gm37125		TEC
ENSMUSG00000026546	34.3055	-0.495707	0.393847	-1.25863	0.208164	0.489981	-0.10827	0.207578	1	ensembl_havana	172520801	172545870	ENSMUSG00000026546	Cfap45	71870	protein_coding
ENSMUSG00000085184	2.73998	-0.62746	1.2229	-0.513091	0.607888		-0.0152988	0.192473	1	havana	172538133	172558129	ENSMUSG00000085184	4933439K11Rik	71319	processed_transcript
ENSMUSG00000026544	7.85383	-0.0717067	0.759167	-0.0944545	0.924748		-0.00428212	0.187982	1	ensembl_havana	172630764	172632962	ENSMUSG00000026544	Dusp23	68440	protein_coding
ENSMUSG00000060128	2.99536	1.17837	1.22681	0.960512	0.336798		0.0294367	0.194828	1	havana	172669034	172669636	ENSMUSG00000060128	Gm2710	108167606	processed_pseudogene
ENSMUSG00000037872	2.05952	-0.777749	1.75772	-0.442476	0.658145		-0.00923049	0.193153	1	ensembl_havana	173331886	173333750	ENSMUSG00000037872	Ackr1	13349	protein_coding
ENSMUSG00000005338	44.4189	0.302025	0.313282	0.964066	0.335013	0.624779	0.0902474	0.184095	1	ensembl_havana	173333258	173367695	ENSMUSG00000005338	Cadm3	94332	protein_coding
ENSMUSG00000037860	1116.41	1.20593	0.206589	5.83734	5.30394e-09	4.90949e-07	1.13537	0.212603	1	ensembl_havana	173350879	173466040	ENSMUSG00000037860	Aim2	383619	protein_coding
ENSMUSG00000026532	667.082	-0.0533209	0.26767	-0.199204	0.842103	0.939954	-0.0181862	0.157734	1	ensembl_havana	174172776	174248450	ENSMUSG00000026532	Spta1	20739	protein_coding
ENSMUSG00000028354	208.616	0.591316	0.158284	3.73579	0.000187128	0.00345372	0.51585	0.165116	1	ensembl_havana	174501825	174822729	ENSMUSG00000028354	Fmn2	54418	protein_coding
ENSMUSG00000050069	4.63828	-1.31332	0.963659	-1.36284	0.172932		-0.0529722	0.20065	1	ensembl_havana	174833785	174921819	ENSMUSG00000050069	Grem2	23893	protein_coding
ENSMUSG00000026526	3384.43	0.0842497	0.0977459	0.861926	0.388728	0.674495	0.0681062	0.0888049	1	ensembl_havana	175600374	175625635	ENSMUSG00000026526	Fh1	14194	protein_coding
ENSMUSG00000026525	11.5385	0.117843	0.624892	0.188581	0.850421	0.943065	0.0105236	0.185601	1	ensembl_havana	175662421	175692776	ENSMUSG00000026525	Opn3	13603	protein_coding
ENSMUSG00000078185	1146.26	0.0264431	0.162018	0.163211	0.870352	0.950992	0.0161894	0.124626	1	ensembl_havana	175682237	175692901	ENSMUSG00000078185	Chml	12663	protein_coding
ENSMUSG00000026523	106.568	0.216065	0.272126	0.793989	0.427202	0.704426	0.0766221	0.170074	1	ensembl_havana	175698593	175815734	ENSMUSG00000026523	Wdr64	75820	protein_coding
ENSMUSG00000039748	3091.67	-0.107096	0.104329	-1.02653	0.304643	0.595371	-0.0844792	0.0945096	1	ensembl_havana	175880581	175913489	ENSMUSG00000039748	Exo1	26909	protein_coding
ENSMUSG00000055214	2.67521	0.911986	1.31244	0.694876	0.487133		0.0197369	0.193348	1	ensembl_havana	175962306	176275312	ENSMUSG00000055214	Pld5	319455	protein_coding
ENSMUSG00000078184	4.2717	-0.102964	0.95065	-0.108309	0.913751		-0.00403238	0.190106	1	ensembl_havana	175977777	175979114	ENSMUSG00000078184	Rbm8a2		protein_coding
ENSMUSG00000057335	1376.48	-0.115677	0.115239	-1.0038	0.315475	0.606015	-0.0875028	0.102622	1	ensembl_havana	176733653	176814067	ENSMUSG00000057335	Cep170	545389	protein_coding
ENSMUSG00000104154	5.12714	0.185394	0.871919	0.212628	0.831617		0.00884058	0.189617	1	havana	176751521	176753415	ENSMUSG00000104154	Gm38104		TEC
ENSMUSG00000026504	156.584	-0.181875	0.208495	-0.872323	0.383032	0.669564	-0.0886269	0.153418	1	ensembl_havana	176814660	177020437	ENSMUSG00000026504	Sdccag8	76816	protein_coding
ENSMUSG00000019699	1145.3	0.353187	0.111084	3.17945	0.00147554	0.0167024	0.308276	0.112034	1	ensembl_havana	177020073	177258203	ENSMUSG00000019699	Akt3	23797	protein_coding
ENSMUSG00000063659	929.329	-0.141933	0.165318	-0.858544	0.390592	0.676499	-0.0850884	0.132944	1	ensembl_havana	177442351	177450764	ENSMUSG00000063659	Zbtb18	30928	protein_coding
ENSMUSG00000015961	8240.41	-0.0394942	0.0917154	-0.430617	0.666747	0.858619	-0.0322608	0.0832218	1	ensembl_havana	177762962	177796511	ENSMUSG00000015961	Adss	11566	protein_coding
ENSMUSG00000102483	1.81627	1.20748	1.63853	0.736926	0.461167		0.016939	0.193718	1	havana	177808431	177962678	ENSMUSG00000102483	Catspere1	631584	protein_coding
ENSMUSG00000026502	2123.78	0.277588	0.0824186	3.36803	0.000757065	0.010235	0.252979	0.0820963	1	ensembl_havana	178187417	178257301	ENSMUSG00000026502	Desi2	78825	protein_coding
ENSMUSG00000103958	3.20016	0.562088	1.06455	0.528004	0.597496		0.018332	0.192033	1	havana	178266204	178267106	ENSMUSG00000103958	Gm8023		processed_pseudogene
ENSMUSG00000104126	5.50828	0.00860573	0.867652	0.00991841	0.992086		0.000508972	0.189277	1	havana	178299396	178299800	ENSMUSG00000104126	Gm37486		processed_pseudogene
ENSMUSG00000086350	7.01646	0.293397	0.754668	0.388775	0.697442		0.0183896	0.189039	1	havana	178313328	178318549	ENSMUSG00000086350	B230369F24Rik		antisense
ENSMUSG00000026500	337.461	-0.0397558	0.216458	-0.183665	0.854276	0.945083	-0.0175955	0.144964	1	ensembl_havana	178319130	178322693	ENSMUSG00000026500	Cox20	66359	protein_coding
ENSMUSG00000039630	52330.2	-0.214818	0.105147	-2.04301	0.0410511	0.184873	-0.181638	0.101259	1	ensembl_havana	178321108	178337797	ENSMUSG00000039630	Hnrnpu	51810	protein_coding
ENSMUSG00000104279	6.20884	0.143703	0.779989	0.184237	0.853828		0.00849325	0.188475	1	havana	178339601	178341470	ENSMUSG00000104279	Gm38300		TEC
ENSMUSG00000026495	188.267	0.270232	0.188743	1.43174	0.152218	0.410735	0.158108	0.162045	1	ensembl_havana	178406085	178484513	ENSMUSG00000026495	Efcab2	68226	protein_coding
ENSMUSG00000026494	9.87627	0.389863	0.806989	0.483108	0.629019	0.838702	0.0215718	0.190267	1	ensembl_havana	178529125	178939200	ENSMUSG00000026494	Kif26b	269152	protein_coding
ENSMUSG00000055067	690.255	0.293814	0.10507	2.79636	0.00516823	0.0437288	0.253857	0.104433	1	ensembl_havana	178951960	179518041	ENSMUSG00000055067	Smyd3	69726	protein_coding
ENSMUSG00000096474	2.00553	0.190619	1.40174	0.135988	0.891831		0.00361378	0.192187	1	havana	179520378	179520857	ENSMUSG00000096474	Gm5561		processed_pseudogene
ENSMUSG00000026492	833.045	0.0690229	0.0996878	0.69239	0.488692	0.752913	0.0545708	0.0897105	1	ensembl_havana	179528055	179546267	ENSMUSG00000026492	Tfb2m	15278	protein_coding
ENSMUSG00000038949	613.06	0.344847	0.145094	2.37672	0.0174674	0.106396	0.268298	0.144684	1	ensembl_havana	179546370	179627478	ENSMUSG00000038949	Cnst	226744	protein_coding
ENSMUSG00000038936	1149.93	0.579953	0.180143	3.21941	0.00128456	0.0150666	0.478129	0.190836	1	ensembl_havana	179668210	179687189	ENSMUSG00000038936	Sccpdh	109232	protein_coding
ENSMUSG00000087236	10.7947	-0.290124	0.644128	-0.450414	0.652412	0.851206	-0.0240824	0.187746	1	havana	179695297	179745271	ENSMUSG00000087236	Kif28	383592	protein_coding
ENSMUSG00000026491	12445.1	-0.0601984	0.0967625	-0.622125	0.533859	0.783552	-0.0483692	0.0873611	1	ensembl_havana	179744894	179803680	ENSMUSG00000026491	Ahctf1	226747	protein_coding
ENSMUSG00000026490	1564.54	0.135271	0.112221	1.2054	0.22805	0.514047	0.104795	0.101704	1	ensembl_havana	179960472	180165603	ENSMUSG00000026490	Cdc42bpa	226751	protein_coding
ENSMUSG00000026489	443.595	-0.103438	0.218846	-0.472653	0.63646	0.842778	-0.0460424	0.148574	1	ensembl_havana	180165238	180199602	ENSMUSG00000026489	Coq8a	67426	protein_coding
ENSMUSG00000104520	2.6247	-1.29924	1.23139	-1.0551	0.291381		-0.0318631	0.195445	1	havana	180202303	180212401	ENSMUSG00000104520	Gm37336		lincRNA
ENSMUSG00000010609	150.635	0.51949	0.219312	2.36873	0.0178495	0.108148	0.349499	0.233342	1	ensembl_havana	180227004	180263438	ENSMUSG00000010609	Psen2	19165	protein_coding
ENSMUSG00000055676	3.10431	0.137548	1.12223	0.122567	0.90245		0.00406255	0.191186	1	ensembl_havana	180326970	180330550	ENSMUSG00000055676	Gm5069		transcribed_processed_pseudogene
ENSMUSG00000038855	66.7441	-0.357201	0.28244	-1.26469	0.205981	0.487244	-0.130679	0.195571	1	ensembl_havana	180330485	180424802	ENSMUSG00000038855	Itpkb	320404	protein_coding
ENSMUSG00000053963	3.81437	0.108258	1.09985	0.0984303	0.921591		0.00336206	0.191041	1	ensembl_havana	180432387	180483504	ENSMUSG00000053963	Stum	381310	protein_coding
ENSMUSG00000026496	26931.7	0.23733	0.0952909	2.49058	0.0127533	0.0855078	0.200336	0.093171	1	ensembl_havana	180568924	180601254	ENSMUSG00000026496	Parp1	11545	protein_coding
ENSMUSG00000098926	7.99283	0.482217	0.701347	0.687557	0.491731	0.755357	0.0349623	0.191188	1	mirbase	180587201	180587267	ENSMUSG00000098926	Mir6904	102466761	miRNA
ENSMUSG00000058729	1120.01	0.125872	0.112421	1.11965	0.262865	0.552673	0.0966266	0.101269	1	ensembl_havana	180641150	180690694	ENSMUSG00000058729	Lin9	72568	protein_coding
ENSMUSG00000026497	27.1397	0.229658	0.472506	0.486043	0.626937	0.837528	0.0339546	0.182962	1	ensembl_havana	180693043	180697034	ENSMUSG00000026497	Mixl1	27217	protein_coding
ENSMUSG00000026499	1373.91	-0.114219	0.103689	-1.10155	0.270657	0.560324	-0.0906756	0.0943918	1	ensembl_havana	180726043	180754204	ENSMUSG00000026499	Acbd3	170760	protein_coding
ENSMUSG00000103156	1.67442	-0.942699	1.59872	-0.589658	0.55542		-0.013716	0.193284	1	havana	180763497	180768656	ENSMUSG00000103156	Gm38293		lincRNA
ENSMUSG00000060743	11528.5	-0.201112	0.0904752	-2.22284	0.0262264	0.139367	-0.174421	0.0876472	1	ensembl_havana	180800832	180813943	ENSMUSG00000060743	H3f3a	15078	protein_coding
ENSMUSG00000073485	7.46294	0.147934	0.754725	0.196011	0.844601		0.00927457	0.18817	1	ensembl_havana	180813776	180816859	ENSMUSG00000073485	H3f3aos		antisense
ENSMUSG00000038806	3231.91	-0.265495	0.0937691	-2.83137	0.00463496	0.0402845	-0.233339	0.0927717	1	ensembl_havana	180851127	180868113	ENSMUSG00000038806	Sde2	208768	protein_coding
ENSMUSG00000103979	227.516	0.108101	0.324435	0.333199	0.738984	0.898589	0.029061	0.168535	1	havana	180854282	180854458	ENSMUSG00000103979	Gm20305		processed_pseudogene
ENSMUSG00000066652	1756.87	-0.158598	0.289418	-0.547991	0.583698	0.813092	-0.0499455	0.166658	1	ensembl_havana	180893108	180899103	ENSMUSG00000066652	Lefty2	320202	protein_coding
ENSMUSG00000026520	2523.15	-0.248208	0.15895	-1.56155	0.118395	0.358446	-0.166262	0.143513	1	ensembl_havana	180904293	180908088	ENSMUSG00000026520	Pycr2	69051	protein_coding
ENSMUSG00000038793	2083.87	-0.439583	0.665036	-0.660991	0.508618	0.767093	-0.0343957	0.190417	1	ensembl_havana	180935022	180938400	ENSMUSG00000038793	Lefty1	13590	protein_coding
ENSMUSG00000026519	428.094	-0.293062	0.185866	-1.57674	0.114855	0.353354	-0.17778	0.165354	1	ensembl_havana	180942344	180975112	ENSMUSG00000026519	Tmem63a	208795	protein_coding
ENSMUSG00000038776	355.487	-0.116975	0.249342	-0.469137	0.638971	0.844008	-0.0444937	0.156833	1	ensembl_havana	180976210	181020904	ENSMUSG00000038776	Ephx1	13849	protein_coding
ENSMUSG00000026516	7424.81	-0.174322	0.081708	-2.13347	0.0328858	0.16067	-0.153655	0.0789584	1	ensembl_havana	181087138	181144204	ENSMUSG00000026516	Nvl	67459	protein_coding
ENSMUSG00000062169	1282.68	0.000962491	0.102132	0.00942395	0.992481	0.996569	0.000830444	0.090373	1	ensembl_havana	181144693	181168994	ENSMUSG00000062169	Cnih4	98417	protein_coding
ENSMUSG00000038733	5043.27	-0.292599	0.0796677	-3.67274	0.000239962	0.00416399	-0.269107	0.0795986	1	ensembl_havana	181173228	181212001	ENSMUSG00000038733	Wdr26	226757	protein_coding
ENSMUSG00000054135	2.17863	-0.0633587	1.29866	-0.0487876	0.961089		-0.00133301	0.191851	1	ensembl_havana	181225986	181228498	ENSMUSG00000054135	A430110L20Rik		lincRNA
ENSMUSG00000081214	79.6716	-0.225273	0.233641	-0.964184	0.334954	0.624779	-0.0984168	0.16554	1	havana	181241988	181242320	ENSMUSG00000081214	Rpl35a-ps2		processed_pseudogene
ENSMUSG00000103260	25.248	0.139904	0.393204	0.355805	0.721987	0.890168	0.0277721	0.176088	1	havana	181282046	181283892	ENSMUSG00000103260	Gm8146	666519	processed_pseudogene
ENSMUSG00000026514	2.13396	-0.568439	1.36497	-0.416449	0.677082		-0.0112764	0.192516	1	ensembl_havana	181352628	181460641	ENSMUSG00000026514	Cnih3	72978	protein_coding
ENSMUSG00000047369	20.6689	-0.400387	0.562048	-0.712371	0.476235	0.742397	-0.0434449	0.189612	1	ensembl_havana	181576559	181815774	ENSMUSG00000047369	Dnah14	240960	protein_coding
ENSMUSG00000064970	2.86762	-0.851997	1.1629	-0.732646	0.463774		-0.0232083	0.193349	1	ensembl	181813607	181813700	ENSMUSG00000064970	Gm23690	115487595	snRNA
ENSMUSG00000004880	7457.45	-0.104109	0.0821956	-1.2666	0.2053	0.486574	-0.0896284	0.0772843	1	ensembl_havana	181815335	181843046	ENSMUSG00000004880	Lbr	98386	protein_coding
ENSMUSG00000022995	28844.4	-0.438525	0.161169	-2.7209	0.00651046	0.0518246	-0.344108	0.166161	1	ensembl_havana	181896384	182019990	ENSMUSG00000022995	Enah	13800	protein_coding
ENSMUSG00000103722	3.24428	-0.349821	1.20095	-0.291286	0.770833		-0.00887531	0.191774	1	havana	181950132	181953375	ENSMUSG00000103722	2700078F05Rik		TEC
ENSMUSG00000103317	4.09467	-1.03731	1.0608	-0.977856	0.328146		-0.0338216	0.195121	1	havana	181967699	181969923	ENSMUSG00000103317	Gm38359		TEC
ENSMUSG00000102950	3.73468	-2.40489	1.24752	-1.92774	0.0538876		-0.059958	0.205602	1	havana	181986336	181990204	ENSMUSG00000102950	Gm37018		TEC
ENSMUSG00000102760	8.05412	-1.13389	0.778628	-1.45627	0.145319	0.399726	-0.06981	0.206156	1	havana	182006060	182007686	ENSMUSG00000102760	Gm37258		TEC
ENSMUSG00000026511	2774.86	-0.00167864	0.0791669	-0.0212038	0.983083	0.9939	-0.00129383	0.0732996	1	ensembl_havana	182124737	182132407	ENSMUSG00000026511	Srp9	27058	protein_coding
ENSMUSG00000091013	3.9256	-2.02954	1.15044	-1.76414	0.0777079		-0.0584756	0.204407	1	ensembl_havana	182154704	182164486	ENSMUSG00000091013	Vmn1r1	625823	protein_coding
ENSMUSG00000038633	3205.75	0.0707188	0.0955123	0.740415	0.459048	0.731573	0.0574775	0.086734	1	ensembl_havana	182275772	182282804	ENSMUSG00000038633	Degs1	13244	protein_coding
ENSMUSG00000100147	1.78798	1.92126	1.84249	1.04275	0.297064		0.0212992	0.194682	1	havana	182287990	182303325	ENSMUSG00000100147	1700047M11Rik	67330	lincRNA
ENSMUSG00000047539	1670.47	-0.136953	0.110797	-1.23607	0.216431	0.500711	-0.106591	0.10077	1	ensembl_havana	182313102	182341629	ENSMUSG00000047539	Fbxo28	67948	protein_coding
ENSMUSG00000026510	1332.06	-0.204776	0.142806	-1.43395	0.151587	0.409741	-0.144975	0.128354	1	ensembl_havana	182409172	182462432	ENSMUSG00000026510	Trp53bp2	209456	protein_coding
ENSMUSG00000026509	820.432	0.0781031	0.195303	0.399908	0.689224	0.872831	0.0394791	0.139741	1	ensembl_havana	182467260	182517608	ENSMUSG00000026509	Capn2	12334	protein_coding
ENSMUSG00000102234	8.144	0.132461	0.736455	0.179863	0.85726	0.946438	0.00870738	0.187842	1	havana	182484179	182492473	ENSMUSG00000102234	Gm37885		antisense
ENSMUSG00000104376	2.14331	-2.58666	1.6661	-1.55252	0.120538		-0.035789	0.197639	1	havana	182679939	182681892	ENSMUSG00000104376	Gm37516		TEC
ENSMUSG00000102688	1.97985	1.37596	1.5532	0.885886	0.375679		0.0215864	0.194239	1	havana	182687730	182688228	ENSMUSG00000102688	Gm37218		lincRNA
ENSMUSG00000038576	299.945	0.0220619	0.172965	0.127551	0.898504	0.964567	0.0124496	0.12928	1	ensembl_havana	182763860	182896591	ENSMUSG00000038576	Susd4	96935	protein_coding
ENSMUSG00000079164	20.0745	0.541871	0.639578	0.847232	0.396866	0.681866	0.0467931	0.193251	1	ensembl_havana	182954788	182976044	ENSMUSG00000079164	Tlr5	53791	protein_coding
ENSMUSG00000030768	352.285	0.0286415	0.140212	0.204273	0.83814	0.938042	0.018889	0.113918	1	ensembl_havana	183086266	183221522	ENSMUSG00000030768	Disp1	68897	protein_coding
ENSMUSG00000102478	28.5807	-0.188851	0.414901	-0.455171	0.648987	0.849511	-0.0340808	0.179107	1	havana	183205071	183206557	ENSMUSG00000102478	BC085271	100504508	transcribed_processed_pseudogene
ENSMUSG00000046836	1755.14	0.0247411	0.0852178	0.290328	0.771565	0.910251	0.0207778	0.0781221	1	ensembl_havana	183276352	183297269	ENSMUSG00000046836	Brox	71678	protein_coding
ENSMUSG00000042901	1608.47	-0.067956	0.0864386	-0.786177	0.431764	0.708311	-0.0571634	0.0797535	1	ensembl_havana	183296590	183325476	ENSMUSG00000042901	Aida	108909	protein_coding
ENSMUSG00000056050	2463.83	-0.0950773	0.107886	-0.881275	0.378169	0.666333	-0.0739702	0.0965297	1	ensembl_havana	183326725	183369553	ENSMUSG00000056050	Mia3	338366	protein_coding
ENSMUSG00000072258	780.037	-0.0318515	0.0983041	-0.324009	0.745931	0.900674	-0.0252344	0.0879112	1	ensembl_havana	183388981	183410198	ENSMUSG00000072258	Taf1a	21339	protein_coding
ENSMUSG00000053461	4.99402	-0.571333	0.957433	-0.596734	0.550685		-0.0224113	0.191993	1	ensembl_havana	183418215	183436808	ENSMUSG00000053461	Hhipl2	78772	protein_coding
ENSMUSG00000039384	78.9745	-0.034911	0.319284	-0.109342	0.912932	0.969023	-0.00920079	0.165941	1	ensembl_havana	184013302	184075636	ENSMUSG00000039384	Dusp10	63953	protein_coding
ENSMUSG00000044854	2.56505	-0.930339	1.44391	-0.644319	0.519369		-0.0163761	0.193301	1	ensembl_havana	184033030	184034301	ENSMUSG00000044854	1700056E22Rik	73363	protein_coding
ENSMUSG00000039377	1.82201	-0.632992	1.71363	-0.369386	0.71184		-0.0079784	0.19299	1	ensembl_havana	184727140	184732619	ENSMUSG00000039377	Hlx	15284	protein_coding
ENSMUSG00000026621	2.24523	-0.953737	1.30222	-0.732395	0.463928		-0.0207075	0.193483	1	ensembl_havana	184786767	184811313	ENSMUSG00000026621	Mtarc1	66112	protein_coding
ENSMUSG00000073481	687.645	0.339829	0.124148	2.7373	0.0061946	0.0499661	0.284627	0.124584	1	ensembl_havana	184813068	184846451	ENSMUSG00000073481	Mtarc2	67247	protein_coding
ENSMUSG00000039349	165.849	1.15804	0.266125	4.3515	1.3521e-05	0.000421655	1.03028	0.281742	1	ensembl_havana	184871926	184883218	ENSMUSG00000039349	C130074G19Rik	226777	protein_coding
ENSMUSG00000026620	243.042	-0.194672	0.171937	-1.13223	0.257537	0.547971	-0.116767	0.142256	1	ensembl_havana	184896789	184999570	ENSMUSG00000026620	Mark1	226778	protein_coding
ENSMUSG00000039318	2849.58	-0.0292804	0.076641	-0.382046	0.702427	0.880436	-0.0252811	0.0713987	1	ensembl_havana	185204117	185286759	ENSMUSG00000039318	Rab3gap2	98732	protein_coding
ENSMUSG00000026618	3228.16	-0.016466	0.0918415	-0.179287	0.857712	0.94669	-0.0133767	0.083061	1	ensembl_havana	185284726	185329396	ENSMUSG00000026618	Iars2	381314	protein_coding
ENSMUSG00000102526	80.4187	0.180414	0.334283	0.539704	0.589401	0.816748	0.046589	0.173242	1	havana	185329451	185331858	ENSMUSG00000102526	Gm37785		TEC
ENSMUSG00000026617	1472.96	-0.0974441	0.122049	-0.798401	0.424638	0.70274	-0.0709423	0.106055	1	ensembl_havana	185332149	185357777	ENSMUSG00000026617	Bpnt1	23827	protein_coding
ENSMUSG00000026615	24824.9	0.063065	0.0751058	0.839682	0.401087	0.685476	0.0550469	0.0705642	1	ensembl_havana	185363044	185428360	ENSMUSG00000026615	Eprs	107508	protein_coding
ENSMUSG00000097615	2.72312	0.534265	1.28736	0.415007	0.678137		0.011962	0.192334	1	havana	185447116	185455568	ENSMUSG00000097615	Gm2061	100039138	antisense
ENSMUSG00000026614	45.8017	0.279483	0.29407	0.950396	0.341911	0.631184	0.0913549	0.180374	1	ensembl_havana	185454848	185468762	ENSMUSG00000026614	Slc30a10	226781	protein_coding
ENSMUSG00000102185	22.1712	0.390636	0.434291	0.899482	0.368396	0.656586	0.0685569	0.191085	1	havana	185487294	185498159	ENSMUSG00000102185	5033404E19Rik	114668	transcribed_processed_pseudogene
ENSMUSG00000039246	507.106	-0.703543	0.193764	-3.63092	0.000282412	0.00470677	-0.59893	0.205785	1	ensembl_havana	186087731	186117310	ENSMUSG00000039246	Lyplal1	226791	protein_coding
ENSMUSG00000103056	3.63301	-1.29298	1.18496	-1.09116	0.275204		-0.0338402	0.195821	1	havana	186112181	186112373	ENSMUSG00000103056	Gm38268		TEC
ENSMUSG00000039239	24.527	-1.23572	0.593651	-2.08157	0.0373822	0.173652	-0.145289	0.264448	1	ensembl_havana	186622792	186705989	ENSMUSG00000039239	Tgfb2	21808	protein_coding
ENSMUSG00000001305	3353.27	0.0228687	0.097474	0.234613	0.814509	0.929302	0.0185359	0.087218	1	ensembl_havana	186720978	186749358	ENSMUSG00000001305	Rrp15	67223	protein_coding
ENSMUSG00000097784	8.24346	-1.16507	0.725349	-1.60622	0.108226	0.341098	-0.0843191	0.2134	1	havana	186749396	186752921	ENSMUSG00000097784	A430105J06Rik		lincRNA
ENSMUSG00000104312	59.8733	0.169997	0.31606	0.537863	0.590671	0.817104	0.0477648	0.170792	1	havana	186964528	186967603	ENSMUSG00000104312	Gm37912		antisense
ENSMUSG00000039224	2324.38	0.462442	0.195428	2.36631	0.0179665	0.108627	0.325369	0.203005	1	ensembl_havana	186967416	186970627	ENSMUSG00000039224	D1Pas1	110957	protein_coding
ENSMUSG00000026611	3.53813	-0.445212	1.21189	-0.36737	0.713343		-0.0110307	0.192002	1	ensembl_havana	187044648	187215465	ENSMUSG00000026611	Spata17	74717	protein_coding
ENSMUSG00000039210	892.538	-0.0268447	0.101037	-0.265691	0.790477	0.91836	-0.0210563	0.0897826	1	ensembl_havana	187215508	187351704	ENSMUSG00000039210	Gpatch2	67769	protein_coding
ENSMUSG00000104394	226.692	0.46469	0.158313	2.93526	0.00333265	0.0311561	0.378112	0.164191	1	havana	187236457	187240357	ENSMUSG00000104394	Gm37254		TEC
ENSMUSG00000026610	2.85846	0.286005	1.22026	0.234381	0.814689		0.00715768	0.191737	1	ensembl_havana	187608791	188214885	ENSMUSG00000026610	Esrrg	26381	protein_coding
ENSMUSG00000026609	3.82054	-1.73208	1.06764	-1.62234	0.104731		-0.0585263	0.203797	1	ensembl_havana	188262023	188965041	ENSMUSG00000026609	Ush2a	22283	protein_coding
ENSMUSG00000026608	3421.78	-0.646138	0.107825	-5.99249	2.06649e-09	2.17843e-07	-0.614461	0.109723	1	ensembl_havana	188971095	189007841	ENSMUSG00000026608	Kctd3	226823	protein_coding
ENSMUSG00000037624	7.39856	-1.37003	0.770465	-1.77818	0.0753741		-0.0899553	0.218264	1	ensembl_havana	189207930	189402273	ENSMUSG00000037624	Kcnk2	16526	protein_coding
ENSMUSG00000102824	486.953	-0.0800823	0.129823	-0.616858	0.537329	0.785379	-0.0560705	0.109906	1	havana	189277443	189277823	ENSMUSG00000102824	Pdcd5-ps		processed_pseudogene
ENSMUSG00000026605	6968.91	-0.0771752	0.0909714	-0.848346	0.396245	0.681481	-0.0638859	0.0834937	1	ensembl_havana	189640606	189688086	ENSMUSG00000026605	Cenpf	108000	protein_coding
ENSMUSG00000026604	2948.75	-0.344073	0.235128	-1.46334	0.143373	0.396216	-0.166441	0.192466	1	ensembl_havana	189728268	189876695	ENSMUSG00000026604	Ptpn14	19250	protein_coding
ENSMUSG00000102248	2.41076	-1.65951	1.48327	-1.11882	0.263218		-0.027974	0.195394	1	havana	189827230	189827491	ENSMUSG00000102248	Gm30280		processed_pseudogene
ENSMUSG00000026603	964.999	0.295327	0.116766	2.52922	0.0114317	0.0792701	0.24608	0.115512	1	ensembl_havana	189880492	189922363	ENSMUSG00000026603	Smyd2	226830	protein_coding
ENSMUSG00000010175	17.9288	0.381096	0.501061	0.760579	0.446909	0.720805	0.0512981	0.189235	1	ensembl_havana	190118035	190170714	ENSMUSG00000010175	Prox1	19130	protein_coding
ENSMUSG00000089872	784.236	0.0573804	0.129242	0.443977	0.657059	0.853425	0.0399249	0.10859	1	ensembl_havana	190700202	190911770	ENSMUSG00000089872	Rps6kc1	320119	protein_coding
ENSMUSG00000026634	1623.82	-0.0938606	0.140438	-0.668343	0.503914	0.763627	-0.0624925	0.116668	1	ensembl_havana	190925112	190946962	ENSMUSG00000026634	Angel2	52477	protein_coding
ENSMUSG00000037568	229.745	-0.483083	0.194168	-2.48797	0.0128475	0.0860225	-0.349255	0.203764	1	ensembl_havana	190947646	190979296	ENSMUSG00000037568	Vash2	226841	protein_coding
ENSMUSG00000103723	1.87023	-0.550993	1.38621	-0.397482	0.691012		-0.0105227	0.192524	1	havana	191000594	191000798	ENSMUSG00000103723	Gm37095		processed_pseudogene
ENSMUSG00000103964	1.6153	0.263787	1.46728	0.17978	0.857325		0.00458017	0.192361	1	havana	191001425	191001851	ENSMUSG00000103964	Gm8407		processed_pseudogene
ENSMUSG00000066595	458.589	0.0783216	0.126165	0.620789	0.534739	0.784189	0.0558178	0.10762	1	ensembl_havana	191005847	191026158	ENSMUSG00000066595	Flvcr1	226844	protein_coding
ENSMUSG00000057072	33.0513	-0.594272	0.506589	-1.17309	0.240761	0.529158	-0.0812576	0.202741	1	ensembl_havana	191036639	191042942	ENSMUSG00000057072	Spata45	75558	protein_coding
ENSMUSG00000026632	163.433	-0.329842	0.172747	-1.9094	0.0562107	0.22737	-0.223066	0.164958	1	ensembl_havana	191045826	191062932	ENSMUSG00000026632	Tatdn3	68972	protein_coding
ENSMUSG00000062510	951.74	-0.0663721	0.117904	-0.562936	0.573479	0.807251	-0.048991	0.102013	1	ensembl_havana	191063012	191086474	ENSMUSG00000062510	Nsl1	381318	protein_coding
ENSMUSG00000026630	6.55412	-0.194139	0.76839	-0.252657	0.800533		-0.0116005	0.188535	1	ensembl_havana	191097847	191108945	ENSMUSG00000026630	Batf3	381319	protein_coding
ENSMUSG00000026628	111.564	0.762079	0.390425	1.95192	0.0509477	0.212587	0.217968	0.314946	1	ensembl_havana	191170296	191218039	ENSMUSG00000026628	Atf3	11910	protein_coding
ENSMUSG00000073478	9.42746	1.14408	0.718715	1.59184	0.11142	0.346773	0.085279	0.213725	1	ensembl_havana	191224454	191226140	ENSMUSG00000073478	D730003I15Rik		lincRNA
ENSMUSG00000037499	132.196	-0.0578616	0.236154	-0.245016	0.806444	0.925042	-0.0228911	0.150837	1	ensembl_havana	191306789	191318194	ENSMUSG00000037499	Nenf	66208	protein_coding
ENSMUSG00000026627	185.725	0.093467	0.159912	0.584489	0.558892	0.797647	0.0566783	0.126462	1	ensembl_havana	191325912	191350914	ENSMUSG00000026627	Pacc1	66950	protein_coding
ENSMUSG00000026626	2334.09	0.342473	0.107149	3.19622	0.00139239	0.0159536	0.300373	0.107879	1	ensembl_havana	191351975	191403272	ENSMUSG00000026626	Ppp2r5a	226849	protein_coding
ENSMUSG00000103114	1.72528	-0.255313	1.77632	-0.143731	0.885713		-0.00295758	0.192863	1	havana	191436340	191465048	ENSMUSG00000103114	Gm32200	102634668	lincRNA
ENSMUSG00000102246	15.927	0.140984	0.494794	0.284935	0.775694	0.912053	0.0190123	0.181704	1	havana	191535885	191536892	ENSMUSG00000102246	9430037O13Rik		TEC
ENSMUSG00000037474	3891.85	-0.0521421	0.106225	-0.490864	0.623523	0.835204	-0.0404995	0.0938504	1	ensembl_havana	191537356	191575544	ENSMUSG00000037474	Dtl	76843	protein_coding
ENSMUSG00000037461	2652.68	0.0837611	0.11525	0.726775	0.467364	0.73764	0.0625391	0.100992	1	ensembl_havana	191575636	191623688	ENSMUSG00000037461	Ints7	77065	protein_coding
ENSMUSG00000102970	4.85023	0.48712	0.906218	0.53753	0.590901		0.0216412	0.191349	1	havana	191597647	191598270	ENSMUSG00000102970	Gm37349		TEC
ENSMUSG00000026623	1473.81	0.354581	0.163958	2.16263	0.0305694	0.153904	0.256567	0.161991	1	ensembl_havana	191717834	191784255	ENSMUSG00000026623	Lpgat1	226856	protein_coding
ENSMUSG00000102840	19.9145	-0.0669846	0.455429	-0.14708	0.883069	0.957036	-0.0101355	0.178783	1	havana	191820370	191821993	ENSMUSG00000102840	Gm38037		antisense
ENSMUSG00000026622	3411.05	0.0380118	0.118201	0.321587	0.747765	0.901421	0.0279787	0.101357	1	ensembl_havana	191821444	191833050	ENSMUSG00000026622	Nek2	18005	protein_coding
ENSMUSG00000055833	26.3302	-0.0653944	0.393432	-0.166215	0.867988	0.950177	-0.0126558	0.174413	1	ensembl_havana	191886130	191907527	ENSMUSG00000055833	1700034H15Rik	98736	antisense
ENSMUSG00000037434	844.297	0.0782039	0.165084	0.473723	0.635697	0.842383	0.0460259	0.12789	1	ensembl_havana	191906767	191913247	ENSMUSG00000037434	Slc30a1	22782	protein_coding
ENSMUSG00000097416	7.3043	-0.196572	0.759515	-0.258812	0.79578		-0.011938	0.188446	1	havana	191986832	191990138	ENSMUSG00000097416	Gm26670		antisense
ENSMUSG00000026637	21.37	0.349735	0.422029	0.828701	0.407274	0.690431	0.0640336	0.188179	1	ensembl_havana	191997205	192092559	ENSMUSG00000026637	Traf5	22033	protein_coding
ENSMUSG00000103653	27.1693	0.838359	0.511103	1.6403	0.100944	0.327781	0.123802	0.23336	1	havana	192073820	192074450	ENSMUSG00000103653	Gstp-ps		processed_pseudogene
ENSMUSG00000037395	205.509	-0.0817745	0.218212	-0.374748	0.707848	0.882589	-0.0362957	0.147057	1	ensembl_havana	192098546	192138062	ENSMUSG00000037395	Rcor3	214742	protein_coding
ENSMUSG00000058248	26.4489	0.103782	0.454919	0.228132	0.819544	0.931117	0.0161986	0.179188	1	ensembl_havana	192190774	192510159	ENSMUSG00000058248	Kcnh1	16510	protein_coding
ENSMUSG00000037375	24.7045	0.260579	0.392843	0.663315	0.507129	0.7662	0.0527422	0.181655	1	ensembl_havana	192496711	192771223	ENSMUSG00000037375	Hhat	226861	protein_coding
ENSMUSG00000016262	185.274	-0.395321	0.244161	-1.6191	0.105426	0.335682	-0.190794	0.208642	1	ensembl_havana	192844488	192855756	ENSMUSG00000016262	Sertad4	214791	protein_coding
ENSMUSG00000016200	691.392	-0.271447	0.112578	-2.41119	0.0159006	0.0996156	-0.226585	0.110535	1	ensembl_havana	192891233	193035775	ENSMUSG00000016200	Syt14	329324	protein_coding
ENSMUSG00000016181	2287.99	-0.0908064	0.0864254	-1.05069	0.2934	0.584183	-0.07658	0.0803245	1	ensembl_havana	193091104	193130272	ENSMUSG00000016181	Utp25	215193	protein_coding
ENSMUSG00000026638	322.682	-0.208169	0.189714	-1.09728	0.272519	0.562554	-0.114396	0.151261	1	ensembl_havana	193153111	193172023	ENSMUSG00000026638	Irf6	54139	protein_coding
ENSMUSG00000079144	483.75	-0.257666	0.124299	-2.07295	0.0381771	0.176154	-0.20361	0.119779	1	ensembl_havana	193168046	193177832	ENSMUSG00000079144	A130010J15Rik	319266	protein_coding
ENSMUSG00000037318	1.92333	1.30216	1.90225	0.684535	0.493637		0.0133125	0.193697	1	ensembl_havana	193175453	193201703	ENSMUSG00000037318	Traf3ip3	215243	protein_coding
ENSMUSG00000026639	88.9487	1.16984	0.433404	2.69919	0.00695077	0.0545615	0.712055	0.608605	1	ensembl_havana	193207699	193343878	ENSMUSG00000026639	Lamb3	16780	protein_coding
ENSMUSG00000009633	64.198	2.14805	0.66798	3.21574	0.00130108	0.0151879	1.6076	0.821978	1	ensembl_havana	193272161	193273217	ENSMUSG00000009633	G0s2	14373	protein_coding
ENSMUSG00000104348	12.568	1.83438	0.974349	1.88267	0.0597452	0.236163	0.0706674	0.209926	1	havana	193281271	193283843	ENSMUSG00000104348	Gm37691		TEC
ENSMUSG00000016179	2.93099	2.78724	1.42114	1.96126	0.0498483		0.0612834	0.206327	1	ensembl_havana	193346346	193370298	ENSMUSG00000016179	Camk1g	215303	protein_coding
ENSMUSG00000097850	2.38226	1.17102	1.40625	0.832721	0.405002		0.0222201	0.194017	1	havana	193507238	193510174	ENSMUSG00000097850	Mir205hg		lincRNA
ENSMUSG00000026640	228.383	0.618762	0.223918	2.76334	0.0057213	0.0471733	0.458101	0.245314	1	ensembl_havana	194618218	194816869	ENSMUSG00000026640	Plxna2	18845	protein_coding
ENSMUSG00000102523	2.05771	1.42127	1.59693	0.890005	0.373463		0.0208768	0.194235	1	havana	194650319	194652174	ENSMUSG00000102523	Gm37783		TEC
ENSMUSG00000016494	182.336	0.345252	0.248704	1.3882	0.165075	0.430293	0.153555	0.193449	1	ensembl_havana	194938819	194961279	ENSMUSG00000016494	Cd34	12490	protein_coding
ENSMUSG00000097325	3.98927	3.29603	1.37344	2.39984	0.0164024		0.0836381	0.219196	1	havana	194955759	194976960	ENSMUSG00000097325	Gm16897	320400	antisense
ENSMUSG00000096929	6.3993	1.70488	1.26281	1.35007	0.176995		0.038426	0.197636	1	havana	194976375	195037904	ENSMUSG00000096929	A330023F24Rik	320977	processed_transcript
ENSMUSG00000016493	12.5014	-0.714701	0.563477	-1.26838	0.204664	0.485805	-0.0813101	0.205778	1	ensembl_havana	195036826	195092249	ENSMUSG00000016493	Cd46	17221	protein_coding
ENSMUSG00000016481	981.386	-0.203393	0.124486	-1.63386	0.102288	0.330501	-0.154878	0.115534	1	ensembl_havana	195097382	195131586	ENSMUSG00000016481	Cr1l	12946	protein_coding
ENSMUSG00000026616	6.5563	-0.55433	0.81981	-0.676169	0.498933		-0.0295848	0.191931	1	ensembl_havana	195136811	195176716	ENSMUSG00000026616	Cr2	12902	protein_coding
ENSMUSG00000050530	251.984	0.38257	0.181208	2.11122	0.0347531	0.16618	0.263198	0.179589	2	ensembl_havana	3114224	3227806	ENSMUSG00000050530	Fam171a1	269233	protein_coding
ENSMUSG00000026643	4959.15	-0.163041	0.0830505	-1.96315	0.0496285	0.209545	-0.142137	0.0797905	2	ensembl_havana	3284212	3328877	ENSMUSG00000026643	Nmt2	18108	protein_coding
ENSMUSG00000049950	580.093	-0.334422	0.129686	-2.5787	0.00991717	0.0713175	-0.272891	0.129637	2	ensembl_havana	3328949	3332643	ENSMUSG00000049950	Rpp38	227522	protein_coding
ENSMUSG00000026644	43.4623	-0.0395452	0.316035	-0.125129	0.900421	0.965095	-0.0106625	0.165598	2	ensembl_havana	3336168	3340993	ENSMUSG00000026644	Acbd7	78245	protein_coding
ENSMUSG00000026645	4.40578	3.45795	1.50907	2.29144	0.0219381		0.0628376	0.207909	2	ensembl_havana	3341982	3397210	ENSMUSG00000026645	Olah	99035	protein_coding
ENSMUSG00000026650	1.8575	-0.0237232	1.65269	-0.0143543	0.988547		-0.000285224	0.192648	2	ensembl_havana	3409043	3422648	ENSMUSG00000026650	Meig1	104362	protein_coding
ENSMUSG00000026648	572.156	-0.0492465	0.108474	-0.453996	0.649832	0.849587	-0.0377653	0.0953021	2	ensembl_havana	3424131	3464130	ENSMUSG00000026648	Dclre1c	227525	protein_coding
ENSMUSG00000026646	1560.41	-0.198584	0.115005	-1.72674	0.0842139	0.294115	-0.156862	0.107995	2	ensembl_havana	3455815	3475031	ENSMUSG00000026646	Suv39h2	64707	protein_coding
ENSMUSG00000109865	4558.57	0.00164773	0.0725435	0.0227137	0.981879	0.99383	0.00151705	0.067947	2	ensembl_havana	3488850	3512814	ENSMUSG00000109865	Hspa14	50497	protein_coding
ENSMUSG00000051396	291.504	-0.200528	0.238217	-0.841786	0.399908	0.684492	-0.0839921	0.162807	2	ensembl_havana	3504527	3512790	ENSMUSG00000051396	Gm45902	50497	protein_coding
ENSMUSG00000039496	20.0853	-0.193131	0.466071	-0.414382	0.678595	0.865442	-0.0286093	0.181595	2	ensembl_havana	3513030	3526376	ENSMUSG00000039496	Cdnf	227526	protein_coding
ENSMUSG00000026655	464.188	0.136279	0.161126	0.845793	0.397668	0.682631	0.0838669	0.130538	2	ensembl_havana	3570488	3782142	ENSMUSG00000026655	Fam107b	66540	protein_coding
ENSMUSG00000026657	960.891	0.216873	0.15468	1.40208	0.160891	0.424082	0.14508	0.136767	2	ensembl_havana	4017717	4614043	ENSMUSG00000026657	Frmd4a	209630	protein_coding
ENSMUSG00000086018	4.20278	0.344062	1.01245	0.339832	0.733983		0.0123013	0.191048	2	havana	4586024	4587287	ENSMUSG00000086018	Gm13179		antisense
ENSMUSG00000039449	2073.91	0.0564545	0.0922476	0.611989	0.540545	0.787068	0.0463569	0.0839433	2	ensembl_havana	4622058	4652113	ENSMUSG00000039449	Prpf18	67229	protein_coding
ENSMUSG00000083378	2.2685	0.550096	1.49939	0.366881	0.713708		0.0091146	0.192682	2	havana	4700238	4700616	ENSMUSG00000083378	Gm13196		processed_pseudogene
ENSMUSG00000048186	101.736	0.352672	0.23535	1.4985	0.134002	0.382281	0.171576	0.19456	2	ensembl_havana	4717831	4802142	ENSMUSG00000048186	Bend7	209645	protein_coding
ENSMUSG00000026662	3377.89	-0.0334093	0.125087	-0.267088	0.789402	0.918011	-0.0235314	0.105466	2	ensembl_havana	4881564	4910557	ENSMUSG00000026662	Sephs1	109079	protein_coding
ENSMUSG00000026664	1134.37	0.308675	0.197117	1.56595	0.117361	0.357175	0.17967	0.173731	2	ensembl_havana	4919019	4938730	ENSMUSG00000026664	Phyh	16922	protein_coding
ENSMUSG00000086670	4.63564	-0.306443	0.930954	-0.329171	0.742027		-0.0126962	0.190479	2	havana	4942174	4942484	ENSMUSG00000086670	Gm13194		processed_pseudogene
ENSMUSG00000069188	28.1007	0.542923	0.385764	1.4074	0.15931	0.422051	0.128476	0.219772	2	havana	4959545	4959752	ENSMUSG00000069188	Gm13192		processed_pseudogene
ENSMUSG00000026668	9.43075	1.00449	0.917633	1.09465	0.27367	0.563447	0.0437049	0.196969	2	ensembl_havana	4976122	4985748	ENSMUSG00000026668	Ucma	68527	protein_coding
ENSMUSG00000026669	6532.05	-0.0169124	0.127392	-0.132758	0.894385	0.963122	-0.0116033	0.106566	2	ensembl_havana	4989714	5012791	ENSMUSG00000026669	Mcm10	70024	protein_coding
ENSMUSG00000026672	287.814	0.678873	0.222708	3.04827	0.00230164	0.0236821	0.53219	0.243188	2	ensembl_havana	5020642	5064051	ENSMUSG00000026672	Optn	71648	protein_coding
ENSMUSG00000026676	275.061	0.544024	0.231303	2.352	0.0186728	0.111641	0.355783	0.249008	2	ensembl_havana	5137776	5230878	ENSMUSG00000026676	Ccdc3	74186	protein_coding
ENSMUSG00000039145	1603.77	0.482297	0.127254	3.79004	0.000150625	0.00292781	0.428898	0.13074	2	ensembl_havana	5293457	5714515	ENSMUSG00000039145	Camk1d	227541	protein_coding
ENSMUSG00000082013	8.3114	-0.18955	0.658343	-0.28792	0.773408	0.911009	-0.0151022	0.186852	2	havana	5603571	5604161	ENSMUSG00000082013	Gm13216	666599	processed_pseudogene
ENSMUSG00000039128	3328.41	-0.138128	0.130112	-1.06161	0.288412	0.578204	-0.098606	0.113808	2	ensembl_havana	5794294	5845164	ENSMUSG00000039128	Cdc123	98828	protein_coding
ENSMUSG00000025817	3694.28	-0.409429	0.171456	-2.38795	0.0169427	0.103981	-0.302443	0.174586	2	ensembl_havana	5845019	5871895	ENSMUSG00000025817	Nudt5	53893	protein_coding
ENSMUSG00000056718	5.03026	0.567054	0.949377	0.59729	0.550314		0.0230016	0.191973	2	ensembl_havana	5862080	5862934	ENSMUSG00000056718	Gm13199	791411	protein_coding
ENSMUSG00000025816	1451.1	0.0217308	0.144307	0.150587	0.880301	0.955722	0.0141547	0.115934	2	ensembl_havana	5870987	5895432	ENSMUSG00000025816	Sec61a2	57743	protein_coding
ENSMUSG00000025815	1215.46	0.239497	0.118239	2.02553	0.0428126	0.189955	0.191586	0.113477	2	ensembl_havana	5896115	5942792	ENSMUSG00000025815	Dhtkd1	209692	protein_coding
ENSMUSG00000043241	3507.75	-0.00688948	0.0911738	-0.0755642	0.939766	0.979082	-0.00569585	0.0825197	2	ensembl_havana	5951469	6056703	ENSMUSG00000043241	Upf2	326622	protein_coding
ENSMUSG00000045319	75.0455	0.697011	0.316991	2.19883	0.0278899	0.145305	0.338726	0.360164	2	ensembl_havana	6097607	6130211	ENSMUSG00000045319	Proser2	227545	protein_coding
ENSMUSG00000082332	5.87317	0.53388	0.926211	0.576413	0.564336		0.0227356	0.191732	2	havana	6132208	6133956	ENSMUSG00000082332	Gm13384		processed_pseudogene
ENSMUSG00000102887	1.63159	0.90441	1.77778	0.50873	0.610942		0.0106314	0.193269	2	havana	6132869	6140568	ENSMUSG00000102887	Gm10857	100038358	lincRNA
ENSMUSG00000039063	11.5981	-0.316046	0.576898	-0.547837	0.583804	0.813123	-0.0323848	0.187336	2	ensembl_havana	6188465	6213033	ENSMUSG00000039063	Echdc3	67856	protein_coding
ENSMUSG00000039046	1669.68	-0.0816677	0.115031	-0.709962	0.477727	0.743281	-0.0610986	0.100764	2	ensembl_havana	6322667	6446390	ENSMUSG00000039046	Usp6nl	98910	protein_coding
ENSMUSG00000002107	312.653	-0.583237	0.189663	-3.07512	0.00210417	0.0218994	-0.468477	0.202261	2	ensembl_havana	6539694	7509563	ENSMUSG00000002107	Celf2	14007	protein_coding
ENSMUSG00000082953	15.508	-0.425839	0.587635	-0.724666	0.468657	0.738733	-0.0424895	0.190298	2	havana	9041124	9042484	ENSMUSG00000082953	Gm13217		unprocessed_pseudogene
ENSMUSG00000015619	94.942	1.45471	0.501853	2.89869	0.0037473	0.0341954	0.974004	0.670666	2	ensembl_havana	9857078	9890034	ENSMUSG00000015619	Gata3	14462	protein_coding
ENSMUSG00000025783	1.61247	1.76	2.1496	0.818754	0.412927		0.0139407	0.194002	2	ensembl_havana	9881252	9883921	ENSMUSG00000025783	4930412O13Rik		protein_coding
ENSMUSG00000025782	1219.18	0.169707	0.0992333	1.71018	0.0872324	0.300263	0.140668	0.0937311	2	ensembl_havana	9914552	10048596	ENSMUSG00000025782	Taf3	209361	protein_coding
ENSMUSG00000103570	3.56062	0.799039	1.02734	0.777778	0.4367		0.0280731	0.193467	2	ensembl_havana	10047838	10049519	ENSMUSG00000103570	C630004M23Rik		TEC
ENSMUSG00000025781	11117.9	-0.0179615	0.079361	-0.226326	0.820948	0.931727	-0.0157085	0.0734976	2	ensembl_havana	10056016	10080510	ENSMUSG00000025781	Atp5c1	11949	protein_coding
ENSMUSG00000037262	654.758	-0.224447	0.146049	-1.53679	0.124344	0.366359	-0.157143	0.132483	2	ensembl_havana	10080593	10092806	ENSMUSG00000037262	Kin	16588	protein_coding
ENSMUSG00000025780	39.9821	0.020569	0.452189	0.0454876	0.963719	0.986394	0.003388	0.178255	2	ensembl_havana	10153571	10256529	ENSMUSG00000025780	Itih5	209378	protein_coding
ENSMUSG00000086748	120.453	-0.193632	0.219494	-0.882172	0.377684	0.665923	-0.089629	0.157829	2	havana	10339283	10374041	ENSMUSG00000086748	Gm13261		processed_transcript
ENSMUSG00000061186	3030.36	-0.28457	0.24874	-1.14405	0.252604	0.542833	-0.120032	0.178902	2	ensembl_havana	10370510	10595253	ENSMUSG00000061186	Sfmbt2	353282	protein_coding
ENSMUSG00000080657	2.69141	-0.320218	1.20872	-0.264924	0.791068		-0.00796443	0.191764	2	mirbase	10517604	10517730	ENSMUSG00000080657	Mir669i	100316668	miRNA
ENSMUSG00000080594	1.66212	-0.307883	1.89745	-0.162261	0.8711		-0.00315293	0.193001	2	mirbase	10518155	10518279	ENSMUSG00000080594	Mir669h	100316831	miRNA
ENSMUSG00000083900	5.38833	-0.861742	0.894507	-0.963371	0.335362		-0.0393563	0.195264	2	havana	11098933	11100262	ENSMUSG00000083900	Gm13294		processed_pseudogene
ENSMUSG00000026778	3.94608	0.448003	0.988091	0.453402	0.650259		0.0167786	0.191356	2	ensembl_havana	11172108	11301222	ENSMUSG00000026778	Prkcq	18761	protein_coding
ENSMUSG00000082424	21.652	-0.203208	0.430403	-0.472134	0.636831	0.842976	-0.0346012	0.180366	2	havana	11409031	11410030	ENSMUSG00000082424	Gm13292	100040898	processed_pseudogene
ENSMUSG00000026773	842.043	-0.414154	0.152236	-2.72048	0.00651868	0.0518567	-0.330729	0.155943	2	ensembl_havana	11471433	11554077	ENSMUSG00000026773	Pfkfb3	170768	protein_coding
ENSMUSG00000037197	6420.86	-0.0877574	0.0867544	-1.01156	0.311748	0.602884	-0.0729342	0.0804565	2	ensembl_havana	11585437	11604153	ENSMUSG00000037197	Rbm17	76938	protein_coding
ENSMUSG00000026770	3.418	-1.60879	1.29479	-1.24252	0.214047		-0.0355091	0.196739	2	ensembl_havana	11642807	11693193	ENSMUSG00000026770	Il2ra	16184	protein_coding
ENSMUSG00000023206	3.34463	-1.77718	1.1406	-1.5581	0.119209		-0.0523304	0.201591	2	ensembl_havana	11705290	11734317	ENSMUSG00000023206	Il15ra	16169	protein_coding
ENSMUSG00000058594	1676.45	-0.0497129	0.0873955	-0.568826	0.569474	0.803982	-0.041519	0.0801246	2	ensembl_havana	11742573	11777582	ENSMUSG00000058594	Fbh1	50755	protein_coding
ENSMUSG00000047909	997.145	-0.188393	0.145555	-1.29431	0.195558	0.473611	-0.128756	0.127942	2	ensembl_havana	11777876	11790329	ENSMUSG00000047909	Ankrd16	320816	protein_coding
ENSMUSG00000080801	4.23522	-0.902141	0.983196	-0.917559	0.35885		-0.0342212	0.194651	2	havana	12082612	12083992	ENSMUSG00000080801	Gm13310		processed_pseudogene
ENSMUSG00000026768	67.2677	0.146955	0.331031	0.44393	0.657093	0.853425	0.0382825	0.171011	2	ensembl_havana	12106632	12301922	ENSMUSG00000026768	Itga8	241226	protein_coding
ENSMUSG00000026767	1477.6	0.0779228	0.0986295	0.790056	0.429495	0.706898	0.0626122	0.089237	2	ensembl_havana	12347263	12419470	ENSMUSG00000026767	Mindy3	66960	protein_coding
ENSMUSG00000026730	132.453	0.348911	0.203091	1.718	0.0857967	0.29735	0.205097	0.185458	2	ensembl_havana	12924041	13003455	ENSMUSG00000026730	Pter	19212	protein_coding
ENSMUSG00000049630	2.24959	1.0337	1.48352	0.696789	0.485935		0.0175167	0.193506	2	ensembl_havana	13003457	13011806	ENSMUSG00000049630	C1ql3	227580	protein_coding
ENSMUSG00000026727	1825.56	0.105817	0.0918823	1.15166	0.249462	0.539335	0.0878726	0.085102	2	ensembl_havana	13076821	13271415	ENSMUSG00000026727	Rsu1	20163	protein_coding
ENSMUSG00000102691	17.0984	0.527516	0.598017	0.88211	0.377717	0.665923	0.0518598	0.193657	2	havana	13161751	13163623	ENSMUSG00000102691	Gm37780		TEC
ENSMUSG00000086358	2.55012	-0.901179	1.20923	-0.745251	0.45612		-0.0227379	0.193466	2	havana	13271601	13325827	ENSMUSG00000086358	Gm13270		processed_transcript
ENSMUSG00000026726	1043.17	3.39474	0.984324	3.4488	0.000563073	0.00811324	2.67747	1.1901	2	ensembl_havana	13276338	13491813	ENSMUSG00000026726	Cubn	65969	protein_coding
ENSMUSG00000026723	418.105	0.0309431	0.126625	0.244367	0.806946	0.925381	0.021771	0.106319	2	ensembl_havana	13509014	13544668	ENSMUSG00000026723	Trdmt1	13434	protein_coding
ENSMUSG00000026728	2595.65	0.0879456	0.200597	0.438418	0.661083	0.85544	0.0432378	0.142093	2	ensembl_havana	13573927	13582826	ENSMUSG00000026728	Vim	22352	protein_coding
ENSMUSG00000003418	154.675	1.17013	0.305599	3.82898	0.000128677	0.00256501	0.996405	0.331874	2	ensembl_havana	13651021	13794064	ENSMUSG00000003418	St8sia6	241230	protein_coding
ENSMUSG00000063275	152.045	0.0172749	0.186302	0.0927254	0.926122	0.973607	0.00927986	0.134452	2	ensembl_havana	13850282	14056135	ENSMUSG00000063275	Hacd1	30963	protein_coding
ENSMUSG00000102553	2.06477	-1.32961	1.38473	-0.960195	0.336957		-0.02597	0.194651	2	havana	14016086	14020049	ENSMUSG00000102553	D930036K23Rik		TEC
ENSMUSG00000086657	3.54135	-2.30027	1.1669	-1.97127	0.0486925		-0.0681732	0.209123	2	havana	14070332	14073934	ENSMUSG00000086657	Stamos	70957	processed_transcript
ENSMUSG00000026718	2406.27	-0.131829	0.183176	-0.719688	0.471717	0.740136	-0.0730122	0.139507	2	ensembl_havana	14074098	14149634	ENSMUSG00000026718	Stam	20844	protein_coding
ENSMUSG00000103901	28.6578	0.324489	0.427445	0.759136	0.447771	0.72131	0.0575897	0.186418	2	havana	14149820	14153297	ENSMUSG00000103901	Gm37499		TEC
ENSMUSG00000026712	33.9594	-1.99325	0.449532	-4.43407	9.2471e-06	0.000315264	-1.769	0.478816	2	ensembl_havana	14229392	14332057	ENSMUSG00000026712	Mrc1	17533	protein_coding
ENSMUSG00000057914	14.7692	-1.27217	0.623661	-2.03984	0.0413667	0.185783	-0.135694	0.254624	2	ensembl_havana	14603088	14987908	ENSMUSG00000057914	Cacnb2	12296	protein_coding
ENSMUSG00000070271	12.5164	0.0719223	0.573365	0.125439	0.900176	0.964984	0.00752635	0.183921	2	havana	14626889	14627321	ENSMUSG00000070271	Gm13268		processed_pseudogene
ENSMUSG00000026707	387.971	-0.268623	0.12713	-2.11299	0.034602	0.165664	-0.211481	0.122983	2	ensembl_havana	14995131	15055069	ENSMUSG00000026707	Nsun6	74455	protein_coding
ENSMUSG00000017418	2682.45	-0.155085	0.0983371	-1.57707	0.114778	0.353246	-0.127907	0.0922811	2	ensembl_havana	15049395	15082456	ENSMUSG00000017418	Arl5b	75869	protein_coding
ENSMUSG00000102258	2.84748	0.675302	1.19501	0.565101	0.572005		0.0176019	0.192596	2	havana	15056713	15059473	ENSMUSG00000102258	Gm38257		TEC
ENSMUSG00000083860	1.72232	-1.56002	1.61293	-0.9672	0.333444		-0.0224949	0.194535	2	havana	15127600	15128683	ENSMUSG00000083860	Gm13313	633061	processed_pseudogene
ENSMUSG00000082632	15.6512	-0.595103	0.52597	-1.13144	0.257871	0.548054	-0.0757375	0.200852	2	havana	15396748	15397720	ENSMUSG00000082632	Gm13365		processed_pseudogene
ENSMUSG00000075520	1.7215	0.445223	1.49739	0.297333	0.766212		0.00745244	0.192551	2	havana	15526479	16255555	ENSMUSG00000075520	Malrd1	102635496	protein_coding
ENSMUSG00000103865	7.14076	-0.554149	0.872746	-0.634949	0.525462		-0.0260942	0.191868	2	havana	16023108	16023425	ENSMUSG00000103865	Gm37416		TEC
ENSMUSG00000026748	357.151	-0.681281	0.136452	-4.99282	5.95042e-07	3.11726e-05	-0.631499	0.140292	2	ensembl_havana	16356304	16755839	ENSMUSG00000026748	Plxdc2	67448	protein_coding
ENSMUSG00000053702	24.9463	0.502856	0.41704	1.20577	0.227905	0.513923	0.0992588	0.204863	2	ensembl_havana	17343909	17731464	ENSMUSG00000053702	Nebl	74103	protein_coding
ENSMUSG00000054057	79.6156	1.0904	0.491059	2.2205	0.0263845	0.139885	0.217129	0.362103	2	ensembl_havana	18025193	18037737	ENSMUSG00000054057	A930004D18Rik	77940	protein_coding
ENSMUSG00000054074	37.1551	0.439634	0.401418	1.0952	0.273428	0.563212	0.090454	0.198233	2	ensembl_havana	18040676	18049051	ENSMUSG00000054074	Skida1	72668	protein_coding
ENSMUSG00000086340	2.01442	-0.254483	1.56927	-0.162166	0.871175		-0.00378092	0.19256	2	havana	18054193	18056613	ENSMUSG00000086340	1810059C17Rik		processed_transcript
ENSMUSG00000026743	3176.48	0.194115	0.118483	1.63833	0.101352	0.328526	0.151027	0.110347	2	ensembl_havana	18055237	18212388	ENSMUSG00000026743	Mllt10	17354	protein_coding
ENSMUSG00000026740	356.362	0.200227	0.13327	1.50242	0.132989	0.380859	0.146479	0.121447	2	ensembl_havana	18195654	18392830	ENSMUSG00000026740	Dnajc1	13418	protein_coding
ENSMUSG00000051154	426.255	0.618239	0.148465	4.16421	3.12431e-05	0.000827197	0.554797	0.153942	2	ensembl_havana	18672384	18676231	ENSMUSG00000051154	Commd3	12238	protein_coding
ENSMUSG00000026739	477.83	1.55047	0.201726	7.68599	1.51816e-14	5.01666e-12	1.49826	0.205139	2	ensembl_havana	18677018	18686629	ENSMUSG00000026739	Bmi1	12151	protein_coding
ENSMUSG00000026737	485.135	0.306409	0.135285	2.26491	0.0235179	0.13061	0.240446	0.132927	2	ensembl_havana	18842255	18998126	ENSMUSG00000026737	Pip4k2a	18718	protein_coding
ENSMUSG00000023094	656.027	-0.167314	0.157488	-1.06239	0.288059	0.577833	-0.106208	0.132005	2	ensembl_havana	19371440	19394976	ENSMUSG00000023094	Msrb2	76467	protein_coding
ENSMUSG00000086621	2.38287	1.18245	1.57448	0.751008	0.452648		0.0177928	0.193753	2	havana	19634034	19636986	ENSMUSG00000086621	Gm13348		antisense
ENSMUSG00000043415	454.653	-0.218817	0.138745	-1.57711	0.114769	0.353246	-0.158017	0.127058	2	ensembl_havana	19657752	19660583	ENSMUSG00000043415	Otud1	71198	protein_coding
ENSMUSG00000087246	2.08346	-1.93609	1.47499	-1.31262	0.189313		-0.0341874	0.196768	2	havana	19676711	19686157	ENSMUSG00000087246	Gm13346		lincRNA
ENSMUSG00000036617	3899.74	-0.514296	0.127527	-4.03284	5.51069e-05	0.00130069	-0.462003	0.131132	2	ensembl_havana	19909780	20810713	ENSMUSG00000036617	Etl4	208618	protein_coding
ENSMUSG00000060795	3.46002	0.131347	1.1073	0.118619	0.905577		0.00401933	0.191113	2	ensembl_havana	19992921	19993442	ENSMUSG00000060795	Gm13363		processed_pseudogene
ENSMUSG00000082164	2.58079	0.0318786	1.21804	0.0261721	0.97912		0.000848716	0.191542	2	havana	20037096	20037894	ENSMUSG00000082164	Gm13360		processed_pseudogene
ENSMUSG00000081128	13.6693	0.798656	0.537083	1.48702	0.137008	0.387015	0.104616	0.219216	2	havana	20235045	20236064	ENSMUSG00000081128	Gm13328	667609	processed_pseudogene
ENSMUSG00000085477	2.53501	0.39575	1.23213	0.321193	0.748064		0.00970722	0.191937	2	havana	20420570	20432934	ENSMUSG00000085477	Gm13335		antisense
ENSMUSG00000036591	2896.97	-0.0239066	0.112197	-0.213078	0.831267	0.935999	-0.0169185	0.097279	2	ensembl_havana	20847919	20968881	ENSMUSG00000036591	Arhgap21	71435	protein_coding
ENSMUSG00000075514	60.2805	-0.00780888	0.276719	-0.0282195	0.977487	0.99206	-0.00242574	0.158843	2	havana	20969054	20969997	ENSMUSG00000075514	Gm13375		antisense
ENSMUSG00000026679	3.30459	-0.616091	1.26772	-0.485983	0.626979		-0.014052	0.192496	2	ensembl_havana	21180731	21205365	ENSMUSG00000026679	Enkur	71233	protein_coding
ENSMUSG00000048550	589.261	-0.00651283	0.136014	-0.0478836	0.961809	0.985894	-0.00422682	0.111388	2	ensembl_havana	21205724	21215009	ENSMUSG00000048550	Thnsl1	208967	protein_coding
ENSMUSG00000084071	2.92196	-0.0199448	1.14148	-0.0174727	0.98606		-0.000499015	0.191216	2	havana	21244105	21244440	ENSMUSG00000084071	Gm13378	100416185	processed_pseudogene
ENSMUSG00000080846	2.59091	-1.79171	1.35678	-1.32057	0.186646		-0.0367747	0.197204	2	havana	21442909	21443529	ENSMUSG00000080846	Gm13379		processed_pseudogene
ENSMUSG00000025716	3.34145	-1.77661	1.11861	-1.58823	0.112234		-0.0547713	0.202436	2	ensembl_havana	22227503	22618252	ENSMUSG00000025716	Myo3a	667663	protein_coding
ENSMUSG00000082516	1.99712	-0.331592	1.34621	-0.246315	0.805438		-0.00670439	0.192156	2	havana	22410525	22410731	ENSMUSG00000082516	Gm13342		processed_pseudogene
ENSMUSG00000083863	154.343	-0.0439027	0.222917	-0.196947	0.843869	0.940839	-0.0187872	0.146938	2	havana	22587291	22587962	ENSMUSG00000083863	Gm13341		unprocessed_pseudogene
ENSMUSG00000083563	235.279	0.00688427	0.186353	0.0369421	0.970531	0.989418	0.00374138	0.134394	2	havana	22588103	22589647	ENSMUSG00000083563	Gm13340		unprocessed_pseudogene
ENSMUSG00000082884	22.8546	-0.145774	0.5585	-0.261009	0.794086	0.919615	-0.0155913	0.184013	2	havana	22590024	22590533	ENSMUSG00000082884	Gm13339		unprocessed_pseudogene
ENSMUSG00000026787	2.69092	0.527989	1.38884	0.380165	0.703823		0.0102045	0.192494	2	ensembl_havana	22622205	22693874	ENSMUSG00000026787	Gad2	14417	protein_coding
ENSMUSG00000026786	2.35098	0.18671	1.54251	0.121042	0.903658		0.00294951	0.192486	2	ensembl_havana	22774094	22875653	ENSMUSG00000026786	Apbb1ip	54519	protein_coding
ENSMUSG00000026784	822.58	-0.040144	0.107317	-0.37407	0.708352	0.882769	-0.0305733	0.094303	2	ensembl_havana	22895522	22940266	ENSMUSG00000026784	Pdss1	56075	protein_coding
ENSMUSG00000058835	2575.42	-0.0526064	0.117929	-0.446087	0.655535	0.853064	-0.0384243	0.101553	2	ensembl_havana	22940073	23040241	ENSMUSG00000058835	Abi1	11308	protein_coding
ENSMUSG00000083650	2.5399	-0.895364	1.20839	-0.740958	0.458719		-0.022637	0.193443	2	havana	23019131	23019667	ENSMUSG00000083650	Gm13357		processed_pseudogene
ENSMUSG00000026781	1196.59	-0.122433	0.109895	-1.11409	0.26524	0.555266	-0.0949789	0.0992904	2	ensembl_havana	23068167	23115558	ENSMUSG00000026781	Acbd5	74159	protein_coding
ENSMUSG00000026779	2378.05	-0.216343	0.118451	-1.82643	0.0677853	0.255597	-0.170578	0.111987	2	ensembl_havana	23115606	23156024	ENSMUSG00000026779	Mastl	67121	protein_coding
ENSMUSG00000026775	12549.2	-0.122339	0.104763	-1.16777	0.2429	0.531891	-0.0969766	0.0955691	2	ensembl_havana	23156369	23199260	ENSMUSG00000026775	Yme1l1	27377	protein_coding
ENSMUSG00000081648	3.75914	-0.822596	1.04523	-0.787003	0.43128		-0.0274835	0.193543	2	havana	23202033	23203683	ENSMUSG00000081648	Gm13423		processed_pseudogene
ENSMUSG00000084098	2.19862	0.99699	1.31324	0.759181	0.447744		0.0218246	0.193628	2	havana	23235236	23235739	ENSMUSG00000084098	Gm13422	664835	processed_pseudogene
ENSMUSG00000026771	679.655	-0.351424	0.145734	-2.41142	0.0158907	0.0996156	-0.273777	0.145754	2	ensembl_havana	23506220	23572106	ENSMUSG00000026771	Spopl	76857	protein_coding
ENSMUSG00000081519	323.916	-0.0857429	0.135867	-0.631081	0.527988	0.780717	-0.0582285	0.113662	2	havana	23508860	23509307	ENSMUSG00000081519	Gm13331		processed_pseudogene
ENSMUSG00000083116	266.654	-0.322725	0.213291	-1.51307	0.130261	0.375929	-0.172649	0.182075	2	havana	24178834	24180317	ENSMUSG00000083116	Gm13410		processed_pseudogene
ENSMUSG00000026979	461.528	0.58899	0.31489	1.87047	0.0614192	0.240293	0.232116	0.282647	2	ensembl_havana	24367580	24414954	ENSMUSG00000026979	Psd4	215632	protein_coding
ENSMUSG00000026976	142.067	-0.0086296	0.260503	-0.0331266	0.973574	0.990457	-0.00289921	0.155582	2	ensembl_havana	24420560	24475599	ENSMUSG00000026976	Pax8	18510	protein_coding
ENSMUSG00000085057	1.62565	-0.354692	1.60656	-0.220777	0.825266		-0.00509285	0.192662	2	havana	24440418	24486855	ENSMUSG00000085057	Gm13415	102638285	processed_transcript
ENSMUSG00000082307	1.47369	2.70422	1.94659	1.38921	0.164769		0.0257766	0.195651	2	havana	24494068	24495011	ENSMUSG00000082307	Gm13418		processed_pseudogene
ENSMUSG00000004113	174.498	-0.515723	0.325244	-1.58565	0.112819	0.34948	-0.169276	0.235765	2	ensembl_havana	24603887	24763152	ENSMUSG00000004113	Cacna1b	12287	protein_coding
ENSMUSG00000036893	3398.69	-0.336335	0.0827914	-4.06244	4.85623e-05	0.00117033	-0.31013	0.083189	2	ensembl_havana	24789928	24919614	ENSMUSG00000036893	Ehmt1	77683	protein_coding
ENSMUSG00000102875	3.66451	-0.586501	1.09579	-0.535231	0.59249		-0.017826	0.192192	2	havana	24889448	24893866	ENSMUSG00000102875	Gm37139		TEC
ENSMUSG00000026972	325.871	-0.282292	0.185533	-1.52152	0.12813	0.372341	-0.169679	0.163035	2	ensembl_havana	24925352	24935252	ENSMUSG00000026972	Arrdc1	215705	protein_coding
ENSMUSG00000026974	3310.57	-0.184447	0.0932234	-1.97854	0.0478674	0.204603	-0.156732	0.0893553	2	ensembl_havana	24949792	24962075	ENSMUSG00000026974	Zmynd19	67187	protein_coding
ENSMUSG00000026975	749.611	-0.101533	0.107177	-0.947344	0.343464	0.632388	-0.0787603	0.0962741	2	ensembl_havana	24962400	24972163	ENSMUSG00000026975	Dph7	67228	protein_coding
ENSMUSG00000036850	353.999	0.0404133	0.141833	0.284936	0.775693	0.912053	0.0264954	0.115055	2	ensembl_havana	24974117	24975098	ENSMUSG00000036850	Mrpl41	107733	protein_coding
ENSMUSG00000036833	460.762	0.0393045	0.135536	0.289994	0.771821	0.910325	0.026641	0.111609	2	ensembl_havana	24976033	25054057	ENSMUSG00000036833	Pnpla7	241274	protein_coding
ENSMUSG00000006476	138.527	-0.103105	0.292319	-0.352715	0.724302	0.891439	-0.026221	0.163126	2	ensembl_havana	25054355	25062881	ENSMUSG00000006476	Nsmf	56876	protein_coding
ENSMUSG00000036805	1.88081	-1.10104	1.42847	-0.770778	0.440838		-0.020058	0.193735	2	ensembl_havana	25085667	25095149	ENSMUSG00000036805	Noxa1	241275	protein_coding
ENSMUSG00000087028	1.89256	0.681653	1.50009	0.454407	0.649536		0.0113531	0.192841	2	havana	25122603	25145396	ENSMUSG00000087028	Gm13387	329358	lincRNA
ENSMUSG00000078202	115.909	0.617532	0.313991	1.96672	0.0492159	0.208192	0.258965	0.303298	2	ensembl_havana	25180758	25183339	ENSMUSG00000078202	Nrarp	67122	protein_coding
ENSMUSG00000059555	176.128	-0.0692592	0.174164	-0.397668	0.690875	0.873597	-0.0386785	0.131278	2	ensembl_havana	25192966	25196886	ENSMUSG00000059555	Tor4a	227612	protein_coding
ENSMUSG00000013465	2498.47	-0.00295343	0.103806	-0.0284514	0.977302	0.99206	-0.00219204	0.0915282	2	ensembl_havana	25199712	25211489	ENSMUSG00000013465	Nelfb	58202	protein_coding
ENSMUSG00000036770	18.5511	-0.146587	0.483429	-0.303224	0.761719	0.90585	-0.0203295	0.181286	2	ensembl_havana	25212207	25214637	ENSMUSG00000036770	Stpg3	74472	protein_coding
ENSMUSG00000026969	2.55111	-1.34996	1.3021	-1.03676	0.29985		-0.029764	0.195225	2	ensembl_havana	25218745	25222280	ENSMUSG00000026969	Fam166a	68222	protein_coding
ENSMUSG00000036752	20800.4	-0.25106	0.0801714	-3.13154	0.00173892	0.0190438	-0.225424	0.0793921	2	ensembl_havana	25222160	25224702	ENSMUSG00000036752	Tubb4b	227613	protein_coding
ENSMUSG00000006469	37.7574	0.0189011	0.366728	0.05154	0.958895	0.985129	0.00430788	0.171495	2	ensembl_havana	25228898	25234364	ENSMUSG00000006469	Slc34a3	142681	protein_coding
ENSMUSG00000089953	9.76115	0.380371	0.699368	0.543879	0.586525	0.81472	0.027579	0.189553	2	ensembl_havana	25234476	25236787	ENSMUSG00000089953	Rnf224	329360	protein_coding
ENSMUSG00000036731	7.63899	0.127585	0.832693	0.153219	0.878225		0.00671981	0.189042	2	ensembl_havana	25238818	25242452	ENSMUSG00000036731	Cysrt1	67859	protein_coding
ENSMUSG00000044628	100.854	0.715667	0.218691	3.2725	0.00106599	0.0131322	0.581837	0.236397	2	ensembl_havana	25242929	25244262	ENSMUSG00000044628	Rnf208	68846	protein_coding
ENSMUSG00000006471	573.482	-0.100661	0.125457	-0.80235	0.422351	0.701754	-0.0724323	0.108373	2	ensembl_havana	25244821	25256022	ENSMUSG00000006471	Ndor1	78797	protein_coding
ENSMUSG00000078201	58.4345	-0.190371	0.277071	-0.687084	0.49203	0.755613	-0.0647699	0.167733	2	ensembl_havana	25255439	25256292	ENSMUSG00000078201	Tmem203	227615	protein_coding
ENSMUSG00000048707	512.151	-0.0235935	0.164912	-0.143068	0.886237	0.958888	-0.0135607	0.125817	2	ensembl_havana	25262618	25269885	ENSMUSG00000048707	Tprn	97031	protein_coding
ENSMUSG00000026966	653.702	0.0459488	0.115314	0.398466	0.690287	0.873516	0.0341843	0.0997096	2	ensembl_havana	25271039	25272438	ENSMUSG00000026966	Ssna1	68475	protein_coding
ENSMUSG00000026965	2972.17	-0.123517	0.0826355	-1.49473	0.134986	0.383763	-0.106621	0.0782163	2	ensembl_havana	25272478	25285915	ENSMUSG00000026965	Anapc2	99152	protein_coding
ENSMUSG00000026959	140.476	0.501162	0.226764	2.21006	0.0271008	0.142364	0.315988	0.23688	2	ensembl_havana	25291181	25319187	ENSMUSG00000026959	Grin1	14810	protein_coding
ENSMUSG00000036646	2371.86	0.0141536	0.0882895	0.160309	0.872638	0.952328	0.0117522	0.0803932	2	ensembl_havana	25332338	25352212	ENSMUSG00000036646	Man1b1	227619	protein_coding
ENSMUSG00000026958	760.329	-0.390855	0.116838	-3.34527	0.000822016	0.0107996	-0.342082	0.118691	2	ensembl_havana	25352276	25356359	ENSMUSG00000026958	Dpp7	83768	protein_coding
ENSMUSG00000026956	435.848	-0.17626	0.253424	-0.695515	0.486733	0.750833	-0.0673528	0.162692	2	ensembl_havana	25359889	25365682	ENSMUSG00000026956	Uap1l1	227620	protein_coding
ENSMUSG00000026955	459.104	0.108793	0.138231	0.787041	0.431258	0.707766	0.0740274	0.116437	2	ensembl_havana	25372321	25378213	ENSMUSG00000026955	Sapcd2	72080	protein_coding
ENSMUSG00000015085	13.3488	0.248574	0.686198	0.362249	0.717166	0.887398	0.0186443	0.187848	2	ensembl_havana	25395874	25401321	ENSMUSG00000015085	Entpd2	12496	protein_coding
ENSMUSG00000015094	365.676	-0.128882	0.181227	-0.711163	0.476983	0.742661	-0.0706873	0.138353	2	ensembl_havana	25399351	25409494	ENSMUSG00000015094	Npdc1	18146	protein_coding
ENSMUSG00000036587	2.31181	0.559025	1.66715	0.335319	0.737385		0.00748246	0.192894	2	ensembl_havana	25423267	25426374	ENSMUSG00000036587	Fut7	14347	protein_coding
ENSMUSG00000026944	943.16	0.289446	0.129483	2.23541	0.0253905	0.136581	0.229519	0.126599	2	ensembl_havana	25428703	25448540	ENSMUSG00000026944	Abca2	11305	protein_coding
ENSMUSG00000047617	31.1998	-0.391897	0.373896	-1.04814	0.294572	0.58516	-0.089645	0.194235	2	ensembl_havana	25455141	25461094	ENSMUSG00000047617	Paxx	227622	protein_coding
ENSMUSG00000015093	6.37736	1.08966	0.922129	1.18168	0.237333		0.0474275	0.198185	2	ensembl_havana	25456838	25458776	ENSMUSG00000015093	Clic3	69454	protein_coding
ENSMUSG00000015090	25.4909	-0.325018	0.428439	-0.758611	0.448085	0.721462	-0.0570568	0.186349	2	ensembl_havana	25466709	25470046	ENSMUSG00000015090	Ptgds	19215	protein_coding
ENSMUSG00000015083	34.5806	0.105072	0.345023	0.304536	0.760719	0.90557	0.0252376	0.170707	2	ensembl_havana	25498651	25501719	ENSMUSG00000015083	C8g	69379	protein_coding
ENSMUSG00000015095	716.777	-0.02066	0.133069	-0.155258	0.876618	0.954037	-0.0140449	0.109883	2	ensembl_havana	25500750	25505471	ENSMUSG00000015095	Fbxw5	30839	protein_coding
ENSMUSG00000026942	437.296	-0.127064	0.124348	-1.02184	0.306855	0.597941	-0.0925826	0.109337	2	ensembl_havana	25517982	25546940	ENSMUSG00000026942	Traf2	22030	protein_coding
ENSMUSG00000015092	2076.77	0.0465993	0.0961283	0.484761	0.627846	0.838262	0.0376219	0.0865953	2	ensembl_havana	25557847	25562082	ENSMUSG00000015092	Edf1	59022	protein_coding
ENSMUSG00000026941	85.5805	0.119511	0.318119	0.37568	0.707155	0.882108	0.0328958	0.168242	2	ensembl_havana	25563115	25574845	ENSMUSG00000026941	Mamdc4	381352	protein_coding
ENSMUSG00000036504	13.1725	-0.766655	0.533748	-1.43636	0.150899	0.408458	-0.0996712	0.215669	2	ensembl_havana	25573430	25575224	ENSMUSG00000036504	Phpt1	75454	protein_coding
ENSMUSG00000029419	26.1543	-0.958301	0.426382	-2.24752	0.0246069	0.134229	-0.296432	0.471056	2	ensembl_havana	25575416	25581757	ENSMUSG00000029419	Ajm1	381353	protein_coding
ENSMUSG00000015087	2410.2	0.301032	0.101994	2.95145	0.00316286	0.0298598	0.263395	0.10171	2	ensembl_havana	25583018	25608521	ENSMUSG00000015087	Rabl6	227624	protein_coding
ENSMUSG00000026939	126.568	-0.0638237	0.283785	-0.224901	0.822056	0.93229	-0.0202214	0.160998	2	ensembl_havana	25620067	25622005	ENSMUSG00000026939	Tmem141	51875	protein_coding
ENSMUSG00000087612	2.50283	0.328219	1.28249	0.255923	0.79801		0.00739238	0.191991	2	havana	25705850	25709716	ENSMUSG00000087612	A230005M16Rik		antisense
ENSMUSG00000049086	214.691	0.076083	0.18175	0.418613	0.675499	0.864653	0.0410887	0.134664	2	ensembl_havana	25706739	25707721	ENSMUSG00000049086	Bmyc	107771	protein_coding
ENSMUSG00000059625	4.35807	-0.776389	0.938203	-0.827528	0.407938		-0.0323436	0.193794	2	ensembl_havana	25842995	25847248	ENSMUSG00000059625	Sohlh1	227631	protein_coding
ENSMUSG00000058740	40.653	0.0839499	0.322354	0.260427	0.794534	0.919615	0.0226018	0.16742	2	ensembl_havana	25863734	25918273	ENSMUSG00000058740	Kcnt1	227632	protein_coding
ENSMUSG00000026933	2457.32	-0.0687427	0.082398	-0.834276	0.404126	0.688443	-0.0585618	0.0765848	2	ensembl_havana	25926838	25983282	ENSMUSG00000026933	Camsap1	227634	protein_coding
ENSMUSG00000082357	2.05763	-0.751986	1.77686	-0.42321	0.672142		-0.00873063	0.193143	2	havana	25994547	25995183	ENSMUSG00000082357	Gm13542		processed_pseudogene
ENSMUSG00000036352	2582.79	0.0767467	0.0900656	0.85212	0.394148	0.678902	0.0637852	0.0827826	2	ensembl_havana	25998543	26021747	ENSMUSG00000036352	Ubac1	98766	protein_coding
ENSMUSG00000026932	183.54	0.430072	0.216207	1.98917	0.0466828	0.200803	0.260336	0.212672	2	ensembl_havana	26055535	26123220	ENSMUSG00000026932	Nacc2	67991	protein_coding
ENSMUSG00000087679	811.58	-0.153237	0.124322	-1.23258	0.217732	0.502187	-0.113234	0.111261	2	ensembl_havana	26136814	26140521	ENSMUSG00000087679	Tmem250-ps	109299	protein_coding
ENSMUSG00000026934	3.93866	0.743089	1.03697	0.716594	0.473625		0.0255843	0.193056	2	ensembl_havana	26200212	26208289	ENSMUSG00000026934	Lhx3	16871	protein_coding
ENSMUSG00000036327	887.183	0.17067	0.136842	1.24721	0.21232	0.495275	0.121351	0.120975	2	ensembl_havana	26208637	26237525	ENSMUSG00000036327	Qsox2	227638	protein_coding
ENSMUSG00000048038	31.6569	0.528153	0.655308	0.805961	0.420265	0.700255	0.0435482	0.192659	2	ensembl_havana	26243469	26294557	ENSMUSG00000048038	Ccdc187	329366	protein_coding
ENSMUSG00000026930	208.124	0.183717	0.214547	0.856305	0.391829	0.677753	0.0873985	0.155397	2	ensembl_havana	26315515	26348237	ENSMUSG00000026930	Gpsm1	67839	protein_coding
ENSMUSG00000075467	310.408	0.259314	0.140128	1.85055	0.0642337	0.247061	0.191983	0.132396	2	ensembl_havana	26348121	26352110	ENSMUSG00000075467	Dnlz	52838	protein_coding
ENSMUSG00000026928	19.5136	0.557981	0.523566	1.06573	0.286544	0.57587	0.0716498	0.198631	2	ensembl_havana	26352176	26360918	ENSMUSG00000026928	Card9	332579	protein_coding
ENSMUSG00000036281	2296.09	-0.11969	0.111317	-1.07522	0.282277	0.57191	-0.0921565	0.100138	2	ensembl_havana	26362765	26380653	ENSMUSG00000036281	Snapc4	227644	protein_coding
ENSMUSG00000085767	76.1998	-0.0721136	0.273243	-0.263917	0.791844	0.918845	-0.0241018	0.15942	2	havana	26381526	26389018	ENSMUSG00000085767	Gm13563		antisense
ENSMUSG00000026927	2570.16	-0.0649045	0.0841649	-0.771158	0.440613	0.715448	-0.0548129	0.077906	2	ensembl_havana	26382802	26389316	ENSMUSG00000026927	Entr1	68112	protein_coding
ENSMUSG00000026926	5879.59	0.0169226	0.143116	0.118244	0.905875	0.966662	0.0130393	0.115326	2	ensembl_havana	26389339	26397122	ENSMUSG00000026926	Pmpca	66865	protein_coding
ENSMUSG00000026925	339.171	-0.0205911	0.135895	-0.151523	0.879563	0.955706	-0.0137077	0.111438	2	ensembl_havana	26396249	26409203	ENSMUSG00000026925	Inpp5e	64436	protein_coding
ENSMUSG00000026924	4003.08	-0.273334	0.0912619	-2.99505	0.00274396	0.0269426	-0.243045	0.0905925	2	ensembl_havana	26409431	26445216	ENSMUSG00000026924	Sec16a	227648	protein_coding
ENSMUSG00000086714	3.51217	-0.172444	1.0359	-0.166469	0.867788		-0.00575791	0.190784	2	havana	26445696	26459390	ENSMUSG00000086714	0610009E02Rik	100125929	processed_transcript
ENSMUSG00000026923	2034.76	0.208689	0.121823	1.71306	0.0867023	0.299278	0.161477	0.113995	2	ensembl_havana	26457903	26516663	ENSMUSG00000026923	Notch1	18128	protein_coding
ENSMUSG00000026921	448.874	0.280732	0.164564	1.70592	0.0880235	0.301295	0.188656	0.15183	2	ensembl_havana	26580014	26593120	ENSMUSG00000026921	Egfl7	353156	protein_coding
ENSMUSG00000026922	981.482	0.531125	0.137584	3.86037	0.000113217	0.00230499	0.471364	0.142128	2	ensembl_havana	26593057	26604417	ENSMUSG00000026922	Agpat2	67512	protein_coding
ENSMUSG00000036186	120.541	0.349537	0.324884	1.07588	0.281981	0.571714	0.100743	0.191476	2	ensembl_havana	26628457	26636497	ENSMUSG00000036186	Dipk1b	56279	protein_coding
ENSMUSG00000077192	41.8831	-0.0917604	0.312976	-0.293186	0.76938	0.908983	-0.0254267	0.166407	2	ensembl	26639190	26639321	ENSMUSG00000077192	Snora17	100306954	snoRNA
ENSMUSG00000086775	25.675	0.40704	0.395782	1.02844	0.303741	0.594304	0.0852436	0.194699	2	havana	26640372	26645944	ENSMUSG00000086775	Snhg7os		antisense
ENSMUSG00000015787	12.9269	0.590189	0.617465	0.955825	0.33916	0.627929	0.0551288	0.195427	2	ensembl_havana	26842503	26864979	ENSMUSG00000015787	Abo	80908	protein_coding
ENSMUSG00000036160	2179.77	-0.0407456	0.146971	-0.277236	0.781599	0.915239	-0.0258984	0.117711	2	ensembl_havana	26888628	26902879	ENSMUSG00000036160	Surf6	20935	protein_coding
ENSMUSG00000015776	1699.19	0.0339027	0.124116	0.273152	0.784736	0.916352	0.0242054	0.104888	2	ensembl_havana	26905262	26910677	ENSMUSG00000015776	Med22	20933	protein_coding
ENSMUSG00000062647	48289.4	-0.0127317	0.0998342	-0.127529	0.898522	0.964567	-0.0124158	0.0888524	2	ensembl_havana	26910764	26913318	ENSMUSG00000062647	Rpl7a	27176	protein_coding
ENSMUSG00000065258	57.7573	-0.0984259	0.28662	-0.343403	0.731296	0.894573	-0.0310342	0.162739	2	ensembl	26911261	26911334	ENSMUSG00000065258	Gm23969	115489598	snoRNA
ENSMUSG00000015790	584.518	0.0559485	0.109082	0.512903	0.608019	0.826589	0.0428291	0.095891	2	ensembl_havana	26913381	26916530	ENSMUSG00000015790	Surf1	20930	protein_coding
ENSMUSG00000014873	1149.84	-0.408455	0.113421	-3.60123	0.000316719	0.00517809	-0.363175	0.115408	2	ensembl_havana	26916367	26920183	ENSMUSG00000014873	Surf2	20931	protein_coding
ENSMUSG00000014867	3764.4	0.359089	0.0881489	4.07366	4.62793e-05	0.00112478	0.331586	0.0888644	2	ensembl_havana	26920040	26933928	ENSMUSG00000014867	Surf4	20932	protein_coding
ENSMUSG00000049897	3.16919	0.192697	1.17483	0.164021	0.869714		0.00517203	0.191478	2	ensembl_havana	26934047	26953496	ENSMUSG00000049897	Stkld1	279029	protein_coding
ENSMUSG00000052406	1902.79	-0.205052	0.126463	-1.62143	0.104925	0.335303	-0.155128	0.11712	2	ensembl_havana	26953563	26964386	ENSMUSG00000052406	Rexo4	227656	protein_coding
ENSMUSG00000014852	2.04781	0.85279	1.65436	0.51548	0.606218		0.011627	0.193177	2	ensembl_havana	26973416	27009628	ENSMUSG00000014852	Adamts13	279028	protein_coding
ENSMUSG00000015488	400.255	-0.00671013	0.118687	-0.0565366	0.954914	0.983992	-0.00478624	0.101251	2	ensembl_havana	27009926	27021089	ENSMUSG00000015488	Cacfd1	381356	protein_coding
ENSMUSG00000036067	10.5922	-0.971205	0.598007	-1.62407	0.104361	0.334309	-0.104444	0.222956	2	ensembl_havana	27021363	27027998	ENSMUSG00000036067	Slc2a6	227659	protein_coding
ENSMUSG00000087364	2.42609	-0.690655	1.33373	-0.517837	0.604572		-0.0141628	0.192732	2	havana	27037285	27040853	ENSMUSG00000087364	Gm13398	102640749	protein_coding
ENSMUSG00000009216	36.6641	0.791537	0.448131	1.76631	0.0773443	0.278973	0.157432	0.258403	2	ensembl_havana	27110380	27142491	ENSMUSG00000009216	Fam163b	109349	protein_coding
ENSMUSG00000009614	5.49812	-0.407401	0.835946	-0.487354	0.626008		-0.0208222	0.190515	2	ensembl_havana	27188393	27248337	ENSMUSG00000009614	Sardh	192166	protein_coding
ENSMUSG00000009621	1037.87	-0.0341515	0.0934141	-0.365592	0.714669	0.886219	-0.0276951	0.0844054	2	ensembl_havana	27262104	27427033	ENSMUSG00000009621	Vav2	22325	protein_coding
ENSMUSG00000109946	37.7226	1.16082	0.452298	2.56649	0.0102732	0.0730346	0.592784	0.743924	2	havana	27442324	27444221	ENSMUSG00000109946	Brd3os	100504116	protein_coding
ENSMUSG00000026918	4392.23	-0.121038	0.106345	-1.13816	0.255053	0.544962	-0.0961473	0.0967173	2	ensembl_havana	27445579	27507662	ENSMUSG00000026918	Brd3	67382	protein_coding
ENSMUSG00000026917	10895.1	0.0139796	0.108213	0.129187	0.89721	0.96421	0.0107325	0.0945519	2	ensembl_havana	27515157	27536535	ENSMUSG00000026917	Wdr5	140858	protein_coding
ENSMUSG00000080538	3.13524	0.149523	1.25203	0.119424	0.904939		0.0035781	0.191727	2	ensembl	27539805	27539930	ENSMUSG00000080538	Gm25541	115489638	snRNA
ENSMUSG00000085929	146.341	0.0380028	0.24987	0.152091	0.879115	0.955522	0.0147795	0.15365	2	havana	27540426	27543362	ENSMUSG00000085929	Gm13421		processed_transcript
ENSMUSG00000015846	869.318	0.549483	0.132243	4.15509	3.25165e-05	0.000851724	0.493672	0.13626	2	ensembl_havana	27676440	27762957	ENSMUSG00000015846	Rxra	20181	protein_coding
ENSMUSG00000085766	2.12646	0.376361	1.42242	0.264593	0.791323		0.00692365	0.192365	2	havana	27882925	27887052	ENSMUSG00000085766	2810430I11Rik		processed_transcript
ENSMUSG00000026837	838.852	0.803641	0.122968	6.53539	6.34451e-11	9.64758e-09	0.769282	0.125166	2	ensembl_havana	27886425	28039514	ENSMUSG00000026837	Col5a1	12831	protein_coding
ENSMUSG00000026833	236.102	0.50683	0.172774	2.93348	0.0033518	0.0313181	0.406248	0.181313	2	ensembl_havana	28192992	28230736	ENSMUSG00000026833	Olfm1	56177	protein_coding
ENSMUSG00000035829	223.911	-0.0296831	0.14769	-0.200983	0.840712	0.939391	-0.0182343	0.117792	2	ensembl_havana	28446800	28455508	ENSMUSG00000035829	Ppp1r26	241289	protein_coding
ENSMUSG00000026831	286.905	-0.0340675	0.144853	-0.235186	0.814064	0.929131	-0.0217996	0.116465	2	ensembl_havana	28462001	28466332	ENSMUSG00000026831	1700007K13Rik	69327	protein_coding
ENSMUSG00000035772	3123.12	-0.0575466	0.133699	-0.43042	0.66689	0.858622	-0.0391036	0.111134	2	ensembl_havana	28468066	28471178	ENSMUSG00000035772	Mrps2	118451	protein_coding
ENSMUSG00000082895	28.0342	0.033217	0.366807	0.0905572	0.927844	0.974071	0.0074216	0.171618	2	havana	28477166	28478050	ENSMUSG00000082895	Rpsa-ps9	665412	processed_pseudogene
ENSMUSG00000026829	42.9986	0.218198	0.352565	0.618886	0.535991	0.784827	0.0523678	0.177051	2	ensembl_havana	28496891	28505415	ENSMUSG00000026829	Gbgt1	227671	protein_coding
ENSMUSG00000063611	54.2571	0.374409	0.296904	1.26104	0.207293	0.488805	0.128495	0.198765	2	ensembl_havana	28506095	28507773	ENSMUSG00000063611	Gm10134		lincRNA
ENSMUSG00000026821	886.178	-0.0653219	0.154857	-0.42182	0.673156	0.863241	-0.0400845	0.122513	2	ensembl_havana	28513125	28553081	ENSMUSG00000026821	Ralgds	19730	protein_coding
ENSMUSG00000026816	1285.56	0.0466003	0.103196	0.451569	0.65158	0.850681	0.0366429	0.0916321	2	ensembl_havana	28566311	28583751	ENSMUSG00000026816	Gtf3c5	70239	protein_coding
ENSMUSG00000026815	5.04397	0.784625	0.907245	0.864844	0.387124		0.0350625	0.194148	2	ensembl_havana	28609450	28621982	ENSMUSG00000026815	Gfi1b	14582	protein_coding
ENSMUSG00000026812	1588.52	0.274657	0.0976821	2.81174	0.00492743	0.0421653	0.240284	0.0967718	2	ensembl_havana	28641228	28691167	ENSMUSG00000026812	Tsc1	64930	protein_coding
ENSMUSG00000026809	4.54708	0.0992052	0.937778	0.105788	0.915751		0.00419988	0.189995	2	ensembl_havana	28692080	28699727	ENSMUSG00000026809	Spaca9	69987	protein_coding
ENSMUSG00000026807	18.7152	-0.298565	0.630934	-0.47321	0.636063	0.842543	-0.0258789	0.187681	2	ensembl_havana	28700164	28813165	ENSMUSG00000026807	Ak8	68870	protein_coding
ENSMUSG00000035666	3092.08	0.0511051	0.0859521	0.594577	0.552126	0.794173	0.0429005	0.0790383	2	ensembl_havana	28822299	28840360	ENSMUSG00000035666	Gtf3c4	269252	protein_coding
ENSMUSG00000026806	878.495	0.0506224	0.127916	0.395748	0.692291	0.874486	0.0354943	0.107573	2	ensembl_havana	28840406	28905571	ENSMUSG00000026806	Ddx31	227674	protein_coding
ENSMUSG00000079502	26.8031	0.0618329	0.398431	0.155191	0.876671	0.954037	0.0120199	0.174798	2	ensembl_havana	28926949	29055066	ENSMUSG00000079502	Cfap77	329375	protein_coding
ENSMUSG00000083773	14.8828	0.0212265	0.522235	0.0406455	0.967578	0.988194	0.00271949	0.181836	2	havana	28933610	28934609	ENSMUSG00000083773	Gm13394	100033452	processed_pseudogene
ENSMUSG00000026803	1333.21	-0.169905	0.121887	-1.39396	0.16333	0.428146	-0.128357	0.110936	2	ensembl_havana	29060262	29087656	ENSMUSG00000026803	Ttf1	22130	protein_coding
ENSMUSG00000043535	14592.9	-0.213647	0.0852698	-2.50554	0.0122263	0.0832678	-0.189997	0.0833841	2	ensembl_havana	29124181	29182471	ENSMUSG00000043535	Setx	269254	protein_coding
ENSMUSG00000035513	21.1946	0.292753	0.500246	0.585218	0.558401	0.797347	0.0391741	0.185671	2	ensembl_havana	29194541	29253005	ENSMUSG00000035513	Ntng2	171171	protein_coding
ENSMUSG00000026799	583.658	0.0878166	0.122205	0.718601	0.472387	0.740149	0.0639397	0.105649	2	ensembl_havana	29346819	29524793	ENSMUSG00000026799	Med27	68975	protein_coding
ENSMUSG00000039844	4136.23	0.0502102	0.0822918	0.610149	0.541763	0.788067	0.0426201	0.0761452	2	ensembl_havana	29619720	29740978	ENSMUSG00000039844	Rapgef1	107746	protein_coding
ENSMUSG00000079497	2.61111	1.35871	1.45743	0.932265	0.3512		0.0239091	0.194481	2	havana	29744919	29751685	ENSMUSG00000079497	Gm13420	433415	protein_coding
ENSMUSG00000039826	1883.53	-0.136519	0.0927683	-1.47161	0.141127	0.392885	-0.114124	0.0869813	2	ensembl_havana	29761224	29788502	ENSMUSG00000039826	Trub2	227682	protein_coding
ENSMUSG00000026798	346.746	-0.491604	0.155633	-3.15873	0.00158456	0.0177031	-0.409797	0.161876	2	ensembl_havana	29787493	29797935	ENSMUSG00000026798	Coq4	227683	protein_coding
ENSMUSG00000059316	898.402	0.120809	0.120623	1.00154	0.316566	0.606436	0.0897181	0.106538	2	ensembl_havana	29802634	29817522	ENSMUSG00000059316	Slc27a4	26569	protein_coding
ENSMUSG00000069020	1185.64	0.0578598	0.0978734	0.59117	0.554406	0.795322	0.0464774	0.088115	2	ensembl_havana	29820075	29845002	ENSMUSG00000069020	Urm1	68205	protein_coding
ENSMUSG00000039798	2.61621	1.36239	1.31513	1.03594	0.300232		0.0299188	0.195243	2	ensembl_havana	29868723	29870317	ENSMUSG00000039798	2600006K01Rik		antisense
ENSMUSG00000039787	309.308	0.143021	0.179915	0.794936	0.426651	0.704173	0.079963	0.139252	2	ensembl_havana	29869164	29882840	ENSMUSG00000039787	Cercam	99151	protein_coding
ENSMUSG00000026790	8507.08	-0.129021	0.115994	-1.11231	0.266006	0.556109	-0.0978842	0.103933	2	ensembl_havana	29889221	29931746	ENSMUSG00000026790	Odf2	18286	protein_coding
ENSMUSG00000019715	3041.03	-0.070494	0.078402	-0.899135	0.368581	0.656594	-0.0609992	0.073399	2	ensembl_havana	29935426	29960371	ENSMUSG00000019715	Gle1	74412	protein_coding
ENSMUSG00000057738	12889	-0.119543	0.0998997	-1.19663	0.23145	0.51767	-0.0983438	0.0919078	2	ensembl_havana	29965560	30031451	ENSMUSG00000057738	Sptan1	20740	protein_coding
ENSMUSG00000039715	646.21	-0.502335	0.155547	-3.22947	0.00124021	0.0147431	-0.421586	0.161946	2	ensembl_havana	30031546	30048881	ENSMUSG00000039715	Wdr34	71820	protein_coding
ENSMUSG00000054766	69778.8	-0.280408	0.0799284	-3.50824	0.000451087	0.00685326	-0.257552	0.0797053	2	ensembl_havana	30057378	30072577	ENSMUSG00000054766	Set	56086	protein_coding
ENSMUSG00000026785	570.178	-0.0440766	0.161235	-0.273368	0.78457	0.916352	-0.0259745	0.124655	2	ensembl_havana	30077684	30091022	ENSMUSG00000026785	Pkn3	263803	protein_coding
ENSMUSG00000015335	843.321	0.0386762	0.118757	0.325675	0.74467	0.900357	0.0279073	0.101701	2	ensembl_havana	30090944	30093648	ENSMUSG00000015335	Zdhhc12	66220	protein_coding
ENSMUSG00000039686	692.867	-0.257423	0.132162	-1.94779	0.0514399	0.214121	-0.196898	0.126156	2	ensembl_havana	30097283	30124585	ENSMUSG00000039686	Zer1	227693	protein_coding
ENSMUSG00000039678	3658.72	-0.125236	0.128675	-0.973278	0.330415	0.620291	-0.0894457	0.111945	2	ensembl_havana	30133746	30152013	ENSMUSG00000039678	Tbc1d13	70296	protein_coding
ENSMUSG00000015337	182.872	0.515688	0.289628	1.78051	0.0749919	0.273469	0.217984	0.253821	2	ensembl_havana	30171493	30174069	ENSMUSG00000015337	Endog	13804	protein_coding
ENSMUSG00000039660	1858.25	0.0579747	0.149871	0.386832	0.69888	0.877777	0.0369372	0.119775	2	ensembl_havana	30173453	30178459	ENSMUSG00000039660	Spout1	227695	protein_coding
ENSMUSG00000039648	301.728	0.0664576	0.218719	0.30385	0.761242	0.905721	0.02922	0.146481	2	ensembl_havana	30185124	30205847	ENSMUSG00000039648	Kyat1	70266	protein_coding
ENSMUSG00000100747	13.5268	-0.180919	0.633077	-0.285777	0.775049	0.911857	-0.0154676	0.186253	2	ensembl_havana	30236795	30238223	ENSMUSG00000100747	1700084E18Rik		antisense
ENSMUSG00000007476	121.767	-0.370749	0.192736	-1.92361	0.0544032	0.22201	-0.236537	0.185203	2	ensembl_havana	30237715	30263790	ENSMUSG00000007476	Lrrc8a	241296	protein_coding
ENSMUSG00000079484	9.87611	0.758061	0.694657	1.09127	0.275153	0.564734	0.0574425	0.198439	2	ensembl_havana	30266203	30282149	ENSMUSG00000079484	Phyhd1	227696	protein_coding
ENSMUSG00000075419	176.169	-0.106368	0.193467	-0.549803	0.582455	0.812651	-0.054292	0.140897	2	ensembl_havana	30284231	30286334	ENSMUSG00000075419	Dolk	227697	protein_coding
ENSMUSG00000052533	9605.38	0.181155	0.0860387	2.10551	0.0352472	0.167539	0.157873	0.0830126	2	ensembl_havana	30286397	30344266	ENSMUSG00000052533	Nup188	227699	protein_coding
ENSMUSG00000026860	974.26	0.0702831	0.110543	0.635802	0.524906	0.779021	0.05375	0.0973315	2	ensembl_havana	30344809	30359337	ENSMUSG00000026860	Sh3glb2	227700	protein_coding
ENSMUSG00000026858	554.275	0.0498715	0.121012	0.412122	0.68025	0.866659	0.0361785	0.103402	2	ensembl_havana	30364233	30385521	ENSMUSG00000026858	Miga2	108958	protein_coding
ENSMUSG00000026856	818.91	0.0148325	0.116633	0.127172	0.898804	0.964567	0.0108959	0.100014	2	ensembl_havana	30392254	30400529	ENSMUSG00000026856	Dolpp1	57170	protein_coding
ENSMUSG00000026853	290.477	0.315454	0.137322	2.29718	0.0216082	0.123847	0.247255	0.135379	2	ensembl_havana	30400471	30415813	ENSMUSG00000026853	Crat	12908	protein_coding
ENSMUSG00000039515	3695.34	-0.0230393	0.113595	-0.202821	0.839275	0.938884	-0.0169928	0.0981663	2	ensembl_havana	30416039	30447806	ENSMUSG00000039515	Ptpa	110854	protein_coding
ENSMUSG00000089762	357.9	0.155663	0.189087	0.823239	0.410372	0.692946	0.0834047	0.144057	2	ensembl_havana	30471537	30474219	ENSMUSG00000089762	Ier5l	72500	protein_coding
ENSMUSG00000044320	50.9959	0.4113	0.461724	0.890792	0.373041	0.661025	0.0646161	0.191759	2	ensembl_havana	30794769	30803661	ENSMUSG00000044320	1700001O22Rik	73598	protein_coding
ENSMUSG00000026857	688.046	-0.0464227	0.134316	-0.345623	0.729626	0.893983	-0.0313436	0.11111	2	ensembl_havana	30807826	30823033	ENSMUSG00000026857	Ntmt1	66617	protein_coding
ENSMUSG00000039483	1142.8	-0.0757892	0.0951003	-0.796939	0.425486	0.703131	-0.061579	0.0865658	2	ensembl_havana	30823097	30830333	ENSMUSG00000039483	Asb6	72323	protein_coding
ENSMUSG00000039476	70.3246	1.12697	0.41321	2.72736	0.00638438	0.0510361	0.708309	0.555568	2	ensembl_havana	30834972	30881251	ENSMUSG00000039476	Prrx2	20204	protein_coding
ENSMUSG00000050737	139.679	0.583137	0.20337	2.86737	0.004139	0.0369525	0.449517	0.218698	2	ensembl_havana	30889471	30929863	ENSMUSG00000050737	Ptges	64292	protein_coding
ENSMUSG00000026848	1633.49	-0.148572	0.108831	-1.36516	0.172203	0.440192	-0.117273	0.100031	2	ensembl_havana	30952959	30959015	ENSMUSG00000026848	Tor1b	30934	protein_coding
ENSMUSG00000026849	758.89	0.0464332	0.097207	0.477673	0.632883	0.840274	0.037262	0.087376	2	ensembl_havana	30960627	30967933	ENSMUSG00000026849	Tor1a	30931	protein_coding
ENSMUSG00000026851	1270.16	-0.174203	0.113133	-1.5398	0.12361	0.365473	-0.136801	0.104863	2	ensembl_havana	30972177	30982201	ENSMUSG00000026851	BC005624	227707	protein_coding
ENSMUSG00000026854	328.196	0.192501	0.176717	1.08932	0.276014	0.565403	0.113975	0.144364	2	ensembl_havana	30982279	31023586	ENSMUSG00000026854	Usp20	74270	protein_coding
ENSMUSG00000075415	2051.02	-0.110637	0.104496	-1.05877	0.289703	0.579574	-0.0874897	0.0948142	2	ensembl_havana	31026206	31142008	ENSMUSG00000075415	Fnbp1	14269	protein_coding
ENSMUSG00000087269	15.3064	-0.255168	0.530823	-0.480703	0.630728	0.839001	-0.0302092	0.185146	2	havana	31146457	31152291	ENSMUSG00000087269	D330023K18Rik		processed_transcript
ENSMUSG00000000194	1826.72	0.105895	0.102822	1.02988	0.303065	0.593632	0.084686	0.0933977	2	ensembl_havana	31152316	31218775	ENSMUSG00000000194	Gpr107	277463	protein_coding
ENSMUSG00000088891	6.31036	-0.321106	0.801378	-0.400692	0.688647		-0.0177359	0.189653	2	ensembl	31189691	31189814	ENSMUSG00000088891	Gm22516	115489634	snoRNA
ENSMUSG00000062661	362.055	0.299829	0.135561	2.21177	0.0269826	0.141917	0.233797	0.132595	2	ensembl_havana	31245823	31295989	ENSMUSG00000062661	Ncs1	14299	protein_coding
ENSMUSG00000055632	284.953	0.10346	0.178473	0.579698	0.562118	0.799514	0.057286	0.135177	2	ensembl_havana	31314415	31460738	ENSMUSG00000055632	Hmcn2	665700	protein_coding
ENSMUSG00000076441	6639.57	0.474108	0.117336	4.04061	5.33122e-05	0.00126528	0.42897	0.120043	2	ensembl_havana	31470207	31520672	ENSMUSG00000076441	Ass1	11898	protein_coding
ENSMUSG00000026843	5837.37	-0.163269	0.117366	-1.39111	0.164192	0.429279	-0.12512	0.107204	2	ensembl_havana	31572651	31617526	ENSMUSG00000026843	Fubp3	320267	protein_coding
ENSMUSG00000098904	2.16305	-0.0789773	1.66866	-0.0473298	0.96225		-0.00100743	0.192672	2	mirbase	31612421	31612484	ENSMUSG00000098904	Mir6998	102466214	miRNA
ENSMUSG00000039356	4083.18	0.00102473	0.087425	0.0117212	0.990648	0.995923	0.000915811	0.0797024	2	ensembl_havana	31670715	31681349	ENSMUSG00000039356	Exosc2	227715	protein_coding
ENSMUSG00000026842	2392.76	0.261059	0.0949253	2.75015	0.00595685	0.048594	0.2286	0.0937315	2	ensembl_havana	31688376	31804227	ENSMUSG00000026842	Abl1	11350	protein_coding
ENSMUSG00000026841	2.08264	-0.154343	1.48181	-0.104159	0.917043		-0.00256863	0.19234	2	ensembl_havana	31813290	31846005	ENSMUSG00000026841	Fibcd1	98970	protein_coding
ENSMUSG00000026840	3.8442	0.687224	1.01095	0.679779	0.496644		0.0248315	0.192732	2	ensembl_havana	31887291	31946539	ENSMUSG00000026840	Lamc3	23928	protein_coding
ENSMUSG00000001864	343.948	0.311438	0.247951	1.25605	0.209099	0.490974	0.134124	0.184432	2	ensembl_havana	31950139	31973442	ENSMUSG00000001864	Aif1l	108897	protein_coding
ENSMUSG00000001855	5090.33	0.00885059	0.0907254	0.0975536	0.922287	0.972726	0.00787137	0.0822026	2	ensembl_havana	31974436	32053975	ENSMUSG00000001855	Nup214	227720	protein_coding
ENSMUSG00000081480	4.29751	-0.0978636	0.947125	-0.103327	0.917703		-0.00383569	0.190077	2	havana	31985059	31986464	ENSMUSG00000081480	Gm13608	100417346	processed_pseudogene
ENSMUSG00000050592	355.894	0.276238	0.166855	1.65555	0.0978122	0.32142	0.182946	0.152534	2	ensembl_havana	32050055	32084857	ENSMUSG00000050592	Fam78a	241303	protein_coding
ENSMUSG00000099075	3.30248	-1.39217	1.34789	-1.03285	0.301674		-0.0279097	0.195064	2	mirbase	32050946	32051008	ENSMUSG00000099075	Mir7674	102466844	miRNA
ENSMUSG00000051373	20.319	0.534426	0.466778	1.14493	0.25224	0.542661	0.0853322	0.201818	2	ensembl_havana	32095528	32110820	ENSMUSG00000051373	Plpp7	227721	protein_coding
ENSMUSG00000039262	10378.2	-0.0746639	0.0824698	-0.905349	0.36528	0.653338	-0.0632445	0.0767562	2	ensembl_havana	32151082	32234537	ENSMUSG00000039262	Prrc2b	227723	protein_coding
ENSMUSG00000094382	5.43258	-0.0585924	0.820674	-0.0713954	0.943083		-0.00300862	0.188796	2	ensembl	32221970	32222054	ENSMUSG00000094382	Gm22192		snoRNA
ENSMUSG00000094251	4.56858	-0.621008	0.908076	-0.683872	0.494056		-0.0272168	0.192408	2	ensembl	32225653	32225737	ENSMUSG00000094251	Gm25632		snoRNA
ENSMUSG00000086216	10.1951	-0.120081	0.670935	-0.178975	0.857957	0.946899	-0.00915495	0.186617	2	havana	32232782	32236382	ENSMUSG00000086216	Gm13610		antisense
ENSMUSG00000039254	816.624	0.0735632	0.124265	0.591985	0.553861	0.795003	0.0527294	0.106264	2	ensembl_havana	32236590	32255005	ENSMUSG00000039254	Pomt1	99011	protein_coding
ENSMUSG00000002550	881.701	-0.121442	0.100887	-1.20374	0.228689	0.514678	-0.0978467	0.0926507	2	ensembl_havana	32255002	32260159	ENSMUSG00000002550	Uck1	22245	protein_coding
ENSMUSG00000066068	22.2546	0.0273166	0.43769	0.0624108	0.950236	0.982015	0.00464637	0.177374	2	ensembl_havana	32271845	32272162	ENSMUSG00000066068	Gm13611	100504319	processed_pseudogene
ENSMUSG00000044627	5413.66	0.0112528	0.0734233	0.15326	0.878194	0.954882	-0.00232682	0.0685291	2	ensembl_havana	32278816	32288075	ENSMUSG00000044627	Swi5	72931	protein_coding
ENSMUSG00000002546	1534.32	-0.11084	0.093181	-1.18952	0.234236	0.521425	-0.0917051	0.0862997	2	ensembl_havana	32287384	32307921	ENSMUSG00000002546	Golga2	99412	protein_coding
ENSMUSG00000026825	181.718	0.065096	0.296433	0.219598	0.826184	0.933908	0.0196296	0.163168	2	ensembl_havana	32308471	32353338	ENSMUSG00000026825	Dnm1	13429	protein_coding
ENSMUSG00000039205	473.369	-0.114189	0.152251	-0.750006	0.453251	0.726377	-0.0722921	0.124278	2	ensembl_havana	32352327	32380970	ENSMUSG00000039205	Ciz1	68379	protein_coding
ENSMUSG00000039195	287.914	0.290312	0.182591	1.58996	0.111845	0.347528	0.179361	0.163376	2	ensembl_havana	32377097	32381938	ENSMUSG00000039195	1110008P14Rik	73737	protein_coding
ENSMUSG00000026820	452.542	0.0334112	0.147841	0.225994	0.821206	0.931848	0.0213107	0.117958	2	ensembl_havana	32395896	32405772	ENSMUSG00000026820	Ptges2	96979	protein_coding
ENSMUSG00000083004	29.0134	-0.378675	0.371898	-1.01822	0.308573	0.599741	-0.0870742	0.192661	2	havana	32406055	32406656	ENSMUSG00000083004	Gm13413	100504342	processed_pseudogene
ENSMUSG00000026819	684.862	0.185979	0.121617	1.52922	0.126211	0.369657	0.142634	0.112069	2	ensembl_havana	32414487	32451445	ENSMUSG00000026819	Slc25a25	227731	protein_coding
ENSMUSG00000039164	318.227	0.0689535	0.157153	0.438767	0.66083	0.855295	0.0421376	0.123806	2	ensembl_havana	32450457	32456953	ENSMUSG00000039164	Naif1	71254	protein_coding
ENSMUSG00000039157	786.842	0.339337	0.141853	2.39218	0.0167487	0.103188	0.266196	0.141296	2	ensembl_havana	32535332	32569756	ENSMUSG00000039157	Fam102a	98952	protein_coding
ENSMUSG00000026810	817.154	-0.0710282	0.127601	-0.556644	0.577771	0.810369	-0.0498878	0.108144	2	ensembl_havana	32570858	32573579	ENSMUSG00000026810	Dpm2	13481	protein_coding
ENSMUSG00000075405	3.15531	-1.66628	1.20937	-1.37781	0.168263		-0.0427764	0.198497	2	ensembl_havana	32574184	32575684	ENSMUSG00000075405	9430097D07Rik		antisense
ENSMUSG00000046854	64.4413	-0.696563	0.287319	-2.42436	0.0153356	0.0972366	-0.420433	0.335357	2	ensembl_havana	32574797	32583782	ENSMUSG00000046854	Pip5kl1	227733	protein_coding
ENSMUSG00000079442	299.967	-0.0502891	0.153363	-0.32791	0.74298	0.90006	-0.0309668	0.121172	2	ensembl_havana	32587095	32599698	ENSMUSG00000079442	St6galnac4	20448	protein_coding
ENSMUSG00000026811	811.008	0.0508173	0.129375	0.39279	0.694475	0.87553	0.0346884	0.108402	2	ensembl_havana	32599709	32620806	ENSMUSG00000026811	St6galnac6	50935	protein_coding
ENSMUSG00000026817	2057.51	-0.0821414	0.135368	-0.6068	0.543984	0.78947	-0.0558097	0.113184	2	ensembl_havana	32621758	32635058	ENSMUSG00000026817	Ak1	11636	protein_coding
ENSMUSG00000026814	1205.33	0.162799	0.152587	1.06693	0.286005	0.575392	0.10685	0.129157	2	ensembl_havana	32646595	32682669	ENSMUSG00000026814	Eng	13805	protein_coding
ENSMUSG00000009566	2920.25	-0.0948901	0.111364	-0.852071	0.394175	0.678902	-0.072494	0.0988956	2	ensembl_havana	32682609	32704145	ENSMUSG00000009566	Fpgs	14287	protein_coding
ENSMUSG00000009555	2859.84	-0.0289245	0.0859206	-0.336642	0.736386	0.897145	-0.0245053	0.0786978	2	ensembl_havana	32705784	32713076	ENSMUSG00000009555	Cdk9	107951	protein_coding
ENSMUSG00000059013	124.862	-0.231226	0.349668	-0.661274	0.508436	0.767093	-0.0558119	0.177732	2	ensembl_havana	32721055	32755512	ENSMUSG00000059013	Sh2d3c	27387	protein_coding
ENSMUSG00000039021	19.2989	-0.329039	0.457548	-0.719135	0.472057	0.740136	-0.051359	0.186672	2	ensembl_havana	32757026	32775633	ENSMUSG00000039021	Ttc16	338348	protein_coding
ENSMUSG00000009563	679.253	0.478883	0.118759	4.0324	5.52091e-05	0.00130131	0.432971	0.121572	2	ensembl_havana	32757234	32762244	ENSMUSG00000009563	Tor2a	30933	protein_coding
ENSMUSG00000053746	88.4778	-0.0635388	0.298713	-0.212709	0.831554	0.935999	-0.0187434	0.163445	2	ensembl_havana	32775786	32777597	ENSMUSG00000053746	Ptrh1	329384	protein_coding
ENSMUSG00000038987	2.94445	-1.60841	1.26966	-1.2668	0.205227		-0.0373738	0.197093	2	ensembl_havana	32777381	32784428	ENSMUSG00000038987	Cfap157	227736	protein_coding
ENSMUSG00000026797	782.255	0.0296265	0.107955	0.274433	0.783752	0.916108	0.0217769	0.094528	2	ensembl_havana	32787602	32847245	ENSMUSG00000026797	Stxbp1	20910	protein_coding
ENSMUSG00000026796	2941.51	0.0171761	0.0898873	0.191085	0.848459	0.942426	0.0141747	0.0816102	2	ensembl_havana	32876114	32925254	ENSMUSG00000026796	Fam129b	227737	protein_coding
ENSMUSG00000026792	511.882	0.089807	0.117451	0.764631	0.444491	0.718909	0.0668261	0.102711	2	ensembl_havana	32925216	32961614	ENSMUSG00000026792	Lrsam1	227738	protein_coding
ENSMUSG00000038900	42309.4	-0.134668	0.0996801	-1.351	0.176696	0.44698	-0.10957	0.0923434	2	ensembl_havana	32961559	32965345	ENSMUSG00000038900	Rpl12	269261	protein_coding
ENSMUSG00000026791	519.058	-0.0234535	0.171544	-0.13672	0.891252	0.961656	-0.0129725	0.128674	2	ensembl_havana	32972990	32982083	ENSMUSG00000026791	Slc2a8	56017	protein_coding
ENSMUSG00000038860	480.171	0.58603	0.174501	3.35833	0.000784159	0.0104532	0.491864	0.184072	2	ensembl_havana	32986224	33131654	ENSMUSG00000038860	Garnl3	99326	protein_coding
ENSMUSG00000104277	20.9784	0.0424618	0.427198	0.0993961	0.920824	0.972032	0.00741963	0.176757	2	havana	32998527	33002315	ENSMUSG00000104277	Gm38299		TEC
ENSMUSG00000038831	506.433	0.0327495	0.17403	0.188183	0.850733	0.943167	0.0183448	0.129912	2	ensembl_havana	33133417	33371486	ENSMUSG00000038831	Ralgps1	241308	protein_coding
ENSMUSG00000004105	18.515	0.0546859	0.504933	0.108303	0.913755	0.969276	0.00717447	0.181251	2	ensembl_havana	33216069	33247717	ENSMUSG00000004105	Angptl2	26360	protein_coding
ENSMUSG00000068966	1483.85	0.160196	0.102415	1.56419	0.117774	0.357482	0.130614	0.0957821	2	ensembl_havana	33406108	33431324	ENSMUSG00000068966	Zbtb34	241311	protein_coding
ENSMUSG00000026788	1965.05	0.216062	0.118255	1.82709	0.0676868	0.255393	0.170393	0.111807	2	ensembl_havana	33450287	33468559	ENSMUSG00000026788	Zbtb43	71834	protein_coding
ENSMUSG00000038765	44.0717	0.483572	0.387127	1.24913	0.211617	0.494471	0.109251	0.207106	2	ensembl_havana	33560965	33640608	ENSMUSG00000038765	Lmx1b	16917	protein_coding
ENSMUSG00000052951	6.36005	0.186528	0.844666	0.220831	0.825224		0.00947045	0.18936	2	havana	33641193	33646354	ENSMUSG00000052951	C130021I20Rik		antisense
ENSMUSG00000038740	168.134	0.462251	0.272178	1.69834	0.089444	0.304149	0.203779	0.233303	2	ensembl_havana	33729953	33887946	ENSMUSG00000038740	Mvb12b	72543	protein_coding
ENSMUSG00000086904	16.746	-0.23914	0.529864	-0.451323	0.651757	0.850681	-0.0282123	0.18472	2	havana	33978246	33980324	ENSMUSG00000086904	Gm13404		lincRNA
ENSMUSG00000087461	27.1927	1.56579	0.652131	2.40104	0.0163484	0.101523	0.161288	0.292653	2	havana	34018289	34107735	ENSMUSG00000087461	C230014O12Rik	329387	lincRNA
ENSMUSG00000038718	339.865	0.0985868	0.145127	0.679312	0.49694	0.759555	0.0645557	0.119487	2	ensembl_havana	34171457	34373142	ENSMUSG00000038718	Pbx3	18516	protein_coding
ENSMUSG00000038696	1442.17	0.123955	0.09688	1.27947	0.200733	0.479677	0.101736	0.0897123	2	ensembl_havana	34406771	34624950	ENSMUSG00000038696	Mapkap1	227743	protein_coding
ENSMUSG00000081992	180.487	0.0793513	0.174731	0.454133	0.649733	0.849582	0.0444369	0.132054	2	havana	34564999	34565796	ENSMUSG00000081992	Gm13408	623448	processed_pseudogene
ENSMUSG00000087635	26.2878	-0.538639	0.409772	-1.31448	0.188683	0.463813	-0.111103	0.211667	2	havana	34649514	34650240	ENSMUSG00000087635	Gm13414		processed_pseudogene
ENSMUSG00000026867	3743.08	-0.039081	0.11367	-0.343811	0.730988	0.894564	-0.0266682	0.0984298	2	ensembl_havana	34674594	34755232	ENSMUSG00000026867	Gapvd1	66691	protein_coding
ENSMUSG00000026864	21259.2	0.0847479	0.0900879	0.940724	0.346846	0.635989	0.0707344	0.0830384	2	ensembl_havana	34771970	34777547	ENSMUSG00000026864	Hspa5	14828	protein_coding
ENSMUSG00000070953	466.05	-0.0128004	0.159742	-0.0801321	0.936132	0.977727	-0.0110657	0.123411	2	ensembl_havana	34777556	34799912	ENSMUSG00000070953	Rabepk	227746	protein_coding
ENSMUSG00000035949	2944.67	-0.0732147	0.0951993	-0.769068	0.441853	0.716477	-0.0593669	0.0865653	2	ensembl_havana	34804514	34826311	ENSMUSG00000035949	Fbxw2	30050	protein_coding
ENSMUSG00000107167	22.4559	-0.310842	0.494109	-0.629096	0.529287	0.78159	-0.0420638	0.186184	2	havana	34833007	34839728	ENSMUSG00000107167	Gm34653	102637973	protein_coding
ENSMUSG00000026869	4517.18	0.111828	0.0747313	1.4964	0.13455	0.383221	0.0989025	0.0712166	2	ensembl_havana	34849734	34874968	ENSMUSG00000026869	Psmd5	66998	protein_coding
ENSMUSG00000026870	18.2463	-0.335022	0.646699	-0.51805	0.604424	0.824794	-0.0276084	0.18846	2	ensembl_havana	34874396	34892132	ENSMUSG00000026870	Cutal	77996	protein_coding
ENSMUSG00000026873	389.543	-0.211475	0.170019	-1.24383	0.213561	0.496633	-0.129706	0.143826	2	ensembl_havana	34893757	34914026	ENSMUSG00000026873	Phf19	74016	protein_coding
ENSMUSG00000026875	30.4837	-0.122298	0.35366	-0.345807	0.729488	0.893938	-0.028348	0.172184	2	ensembl_havana	34941750	34961772	ENSMUSG00000026875	Traf1	22029	protein_coding
ENSMUSG00000026874	17.4682	1.45977	0.833583	1.7512	0.0799109	0.284996	0.0779096	0.212295	2	ensembl_havana	34983331	35061438	ENSMUSG00000026874	Hc	15139	protein_coding
ENSMUSG00000035875	17.2119	0.108592	0.519191	0.209156	0.834327	0.936463	0.0135119	0.182253	2	ensembl_havana	35081861	35101543	ENSMUSG00000035875	AI182371	98870	protein_coding
ENSMUSG00000057110	2025.56	0.0434541	0.151852	0.286161	0.774755	0.911636	0.0271983	0.12024	2	ensembl_havana	35109492	35178822	ENSMUSG00000057110	Cntrl	26920	protein_coding
ENSMUSG00000026878	4666.83	0.071204	0.107166	0.664427	0.506417	0.765421	0.0536682	0.0949907	2	ensembl_havana	35180205	35201120	ENSMUSG00000026878	Rab14	68365	protein_coding
ENSMUSG00000026879	286.046	-0.0760523	0.206233	-0.368768	0.7123	0.884865	-0.0358463	0.143206	2	ensembl_havana	35256380	35307892	ENSMUSG00000026879	Gsn	227753	protein_coding
ENSMUSG00000026880	272.525	0.336105	0.15604	2.15396	0.0312431	0.155699	0.24805	0.153342	2	ensembl_havana	35313986	35336976	ENSMUSG00000026880	Stom	13830	protein_coding
ENSMUSG00000075391	562.626	-0.0832542	0.109736	-0.758676	0.448046	0.721462	-0.0637974	0.0972773	2	havana	35340409	35340963	ENSMUSG00000075391	Glo1-ps	654354	processed_pseudogene
ENSMUSG00000035778	980.914	0.0776167	0.141508	0.548497	0.583351	0.812953	0.0508841	0.116316	2	ensembl_havana	35400179	35463231	ENSMUSG00000035778	Ggta1	14594	protein_coding
ENSMUSG00000026883	2322.01	-0.259021	0.135731	-1.90835	0.0563465	0.227598	-0.19542	0.129086	2	ensembl_havana	35558266	35730994	ENSMUSG00000026883	Dab2ip	69601	protein_coding
ENSMUSG00000026885	1.80925	1.2211	2.10251	0.58078	0.561389		0.0101993	0.193595	2	ensembl_havana	35751241	35979913	ENSMUSG00000026885	Ttll11	74410	protein_coding
ENSMUSG00000026895	1218.22	0.0604903	0.103428	0.584853	0.558646	0.797476	0.0476002	0.0921514	2	ensembl_havana	36036326	36049406	ENSMUSG00000026895	Ndufa8	68375	protein_coding
ENSMUSG00000026890	80.172	-0.0125382	0.228341	-0.0549101	0.95621	0.984447	-0.00510393	0.147881	2	ensembl_havana	36081953	36105408	ENSMUSG00000026890	Lhx6	16874	protein_coding
ENSMUSG00000026889	1536.31	0.181706	0.1081	1.6809	0.0927815	0.311501	0.146131	0.101478	2	ensembl_havana	36116079	36136773	ENSMUSG00000026889	Rbm18	67889	protein_coding
ENSMUSG00000026887	702.463	-0.285277	0.109812	-2.59787	0.00938027	0.0685003	-0.240636	0.108532	2	ensembl_havana	36136389	36190647	ENSMUSG00000026887	Mrrf	67871	protein_coding
ENSMUSG00000087187	8.04934	1.21546	0.791249	1.53613	0.124506	0.366647	0.0738194	0.208455	2	havana	36216777	36222934	ENSMUSG00000087187	Gm13431		lincRNA
ENSMUSG00000047250	107.909	0.241589	0.40486	0.596724	0.550692	0.793171	0.0463097	0.181106	2	ensembl_havana	36230426	36252272	ENSMUSG00000047250	Ptgs1	19224	protein_coding
ENSMUSG00000080936	2.02571	-0.271257	1.34987	-0.20095	0.840737		-0.00542673	0.192114	2	havana	36336611	36337136	ENSMUSG00000080936	Olfr337-ps1	258092	transcribed_unprocessed_pseudogene
ENSMUSG00000083101	8.89533	-0.976527	0.739428	-1.32065	0.186618	0.460991	-0.0657487	0.203317	2	havana	36389132	36389419	ENSMUSG00000083101	Gm13430		processed_pseudogene
ENSMUSG00000094266	2.23369	-0.961412	1.75046	-0.549233	0.582846		-0.0114656	0.193339	2	ensembl_havana	36452587	36453525	ENSMUSG00000094266	Olfr340	258953	protein_coding
ENSMUSG00000083716	377.826	0.221978	0.228223	0.972634	0.330735	0.620584	0.100142	0.164134	2	havana	36807826	36808392	ENSMUSG00000083716	Gm13436	624088	processed_pseudogene
ENSMUSG00000009030	2499.87	-0.13527	0.0981041	-1.37884	0.167943	0.434342	-0.110412	0.0911403	2	ensembl_havana	37350074	37359332	ENSMUSG00000009030	Pdcl	67466	protein_coding
ENSMUSG00000075376	1967.38	-0.229468	0.15575	-1.47331	0.140668	0.392515	-0.153337	0.138926	2	ensembl_havana	37370069	37422903	ENSMUSG00000075376	Rc3h2	319817	protein_coding
ENSMUSG00000066798	971.395	-0.483082	0.154179	-3.13325	0.0017288	0.0189693	-0.401432	0.160214	2	ensembl_havana	37425500	37443171	ENSMUSG00000066798	Zbtb6	241322	protein_coding
ENSMUSG00000050714	656.218	-0.454284	0.171198	-2.65356	0.00796467	0.0607575	-0.350282	0.177749	2	ensembl_havana	37432168	37443135	ENSMUSG00000050714	Zbtb26	320633	protein_coding
ENSMUSG00000035437	2885.14	-0.262738	0.14709	-1.78624	0.0740603	0.271382	-0.188778	0.137837	2	ensembl_havana	37443279	37566454	ENSMUSG00000035437	Rabgap1	227800	protein_coding
ENSMUSG00000026915	3502.97	-0.0618099	0.100765	-0.613406	0.539608	0.786436	-0.048757	0.090281	2	ensembl_havana	37483228	37703859	ENSMUSG00000026915	Strbp	20744	protein_coding
ENSMUSG00000107491	1.90074	-0.48991	1.58306	-0.30947	0.756964		-0.00715047	0.192739	2	havana	37488675	37489444	ENSMUSG00000107491	Gm17893	100416053	processed_pseudogene
ENSMUSG00000053164	11.0959	0.476848	0.605028	0.788142	0.430614	0.70761	0.0457492	0.19175	2	ensembl_havana	37516332	37520603	ENSMUSG00000053164	Gpr21	338346	protein_coding
ENSMUSG00000035403	22.7214	-0.409046	0.490057	-0.83469	0.403892	0.688158	-0.0570855	0.190722	2	ensembl_havana	37776249	37799103	ENSMUSG00000035403	Crb2	241324	protein_coding
ENSMUSG00000035392	433.756	0.461574	0.151116	3.05443	0.00225492	0.0232459	0.382998	0.156368	2	ensembl_havana	37798991	38287390	ENSMUSG00000035392	Dennd1a	227801	protein_coding
ENSMUSG00000000247	12.2161	0.702206	0.632745	1.10978	0.267095	0.556909	0.06342	0.199374	2	ensembl_havana	38339281	38369733	ENSMUSG00000000247	Lhx2	16870	protein_coding
ENSMUSG00000026749	963.482	0.397263	0.137594	2.88722	0.00388658	0.0351305	0.329585	0.14025	2	ensembl_havana	38511643	38594606	ENSMUSG00000026749	Nek6	59126	protein_coding
ENSMUSG00000026750	8732.03	0.136153	0.0854945	1.59254	0.111264	0.346652	0.116991	0.0810086	2	ensembl_havana	38588036	38644087	ENSMUSG00000026750	Psmb7	19177	protein_coding
ENSMUSG00000083722	36.6858	0.338048	0.414659	0.815244	0.414933	0.696648	0.0634806	0.187405	2	havana	38669417	38688520	ENSMUSG00000083722	Adgrd2-ps		transcribed_unitary_pseudogene
ENSMUSG00000063972	3528.5	0.0263529	0.124639	0.211433	0.832549	0.935999	0.0188005	0.105068	2	ensembl_havana	38723370	38927688	ENSMUSG00000063972	Nr6a1	14536	protein_coding
ENSMUSG00000046618	9.88296	1.11965	0.76732	1.45917	0.144517	0.397955	0.0715172	0.206826	2	ensembl_havana	38931978	38963753	ENSMUSG00000046618	Olfml2a	241327	protein_coding
ENSMUSG00000085755	2.3986	0.688946	1.21744	0.565895	0.571465		0.0173464	0.192638	2	havana	38996713	38998258	ENSMUSG00000085755	Gm13496		antisense
ENSMUSG00000035295	28.623	0.235722	0.382092	0.616926	0.537284	0.785379	0.0497176	0.179738	2	ensembl_havana	38997476	39006168	ENSMUSG00000035295	Wdr38	76646	protein_coding
ENSMUSG00000062997	15857.1	0.00956445	0.124488	0.0768302	0.938759	0.978863	0.0069872	0.104793	2	ensembl_havana	39001580	39005624	ENSMUSG00000062997	Rpl35	66489	protein_coding
ENSMUSG00000026755	1992.45	-0.0612214	0.0882476	-0.693746	0.487842	0.752206	-0.0511407	0.0810098	2	ensembl_havana	39005348	39015877	ENSMUSG00000026755	Arpc5l	74192	protein_coding
ENSMUSG00000026754	364.98	-0.177353	0.127506	-1.39094	0.164245	0.429299	-0.13119	0.115419	2	ensembl_havana	39016155	39065541	ENSMUSG00000026754	Golga1	76899	protein_coding
ENSMUSG00000035236	1027.7	0.116958	0.0965173	1.21179	0.225593	0.51153	0.0959731	0.0891344	2	ensembl_havana	39066214	39190734	ENSMUSG00000035236	Scai	320271	protein_coding
ENSMUSG00000026753	2609.15	0.0189193	0.110643	0.170994	0.864229	0.949195	0.00894627	0.0961271	2	ensembl_havana	39194354	39226451	ENSMUSG00000026753	Ppp6c	67857	protein_coding
ENSMUSG00000083240	142.93	0.105813	0.199882	0.529375	0.596545	0.820373	0.0520785	0.142977	2	ensembl_havana	40127504	40127860	ENSMUSG00000083240	Gm13453		processed_pseudogene
ENSMUSG00000082536	6822.96	-0.092515	0.0804004	-1.15068	0.249865	0.539714	-0.0800623	0.0755094	2	havana	40555752	40557116	ENSMUSG00000082536	Gm13456		processed_pseudogene
ENSMUSG00000049252	6.53766	-0.696433	0.769536	-0.905003	0.365464		-0.0424729	0.194544	2	ensembl_havana	40595246	42653624	ENSMUSG00000049252	Lrp1b	94217	protein_coding
ENSMUSG00000083260	3.82817	-0.173706	0.980153	-0.177223	0.859333		-0.00646417	0.190435	2	havana	40998857	40999209	ENSMUSG00000083260	Gm13460		processed_pseudogene
ENSMUSG00000081999	231.561	-0.0395206	0.164977	-0.239553	0.810677	0.926907	-0.0228792	0.126226	2	havana	41987473	41988829	ENSMUSG00000081999	Gm13461		processed_pseudogene
ENSMUSG00000080994	11.0323	-0.586875	0.633726	-0.926071	0.354409	0.642818	-0.0517566	0.194717	2	havana	43518464	43519398	ENSMUSG00000080994	Gm13464	100041245	processed_pseudogene
ENSMUSG00000026866	10.4088	-2.43775	0.810997	-3.00587	0.00264823	0.0262425	-0.184624	0.348411	2	ensembl_havana	43555329	43682715	ENSMUSG00000026866	Kynu	70789	protein_coding
ENSMUSG00000036890	510.926	-0.0845724	0.125006	-0.676549	0.498692	0.760812	-0.0604215	0.107217	2	ensembl_havana	44564412	44927657	ENSMUSG00000036890	Gtdc1	227835	protein_coding
ENSMUSG00000026872	52.9557	-0.375574	0.350481	-1.0716	0.283902	0.57338	-0.09574	0.193649	2	ensembl_havana	44983632	45117395	ENSMUSG00000026872	Zeb2	24136	protein_coding
ENSMUSG00000086202	20.1383	2.53072	0.990753	2.55434	0.0106389	0.0749829	0.0915208	0.224792	2	havana	45696605	45698447	ENSMUSG00000086202	1700019E08Rik	69405	lincRNA
ENSMUSG00000052155	720.972	-0.081616	0.165658	-0.492677	0.622241	0.834201	-0.0476891	0.12834	2	ensembl_havana	48814109	48903269	ENSMUSG00000052155	Acvr2a	11480	protein_coding
ENSMUSG00000026761	2658.06	-0.175827	0.0852818	-2.06172	0.0392343	0.179395	-0.153168	0.0821642	2	ensembl_havana	48902824	48950277	ENSMUSG00000026761	Orc4	26428	protein_coding
ENSMUSG00000036792	444.498	0.0601159	0.129853	0.462953	0.643398	0.846767	0.041922	0.109058	2	ensembl_havana	48949508	49325405	ENSMUSG00000036792	Mbd5	109241	protein_coding
ENSMUSG00000081272	80.7345	-0.0383143	0.262871	-0.145753	0.884116	0.95755	-0.0133579	0.156443	2	havana	49308155	49309462	ENSMUSG00000081272	Ap2m1-ps		processed_pseudogene
ENSMUSG00000069495	1989.59	-0.224997	0.129268	-1.74055	0.0817628	0.288902	-0.170364	0.120981	2	ensembl_havana	49451486	49551948	ENSMUSG00000069495	Epc2	227867	protein_coding
ENSMUSG00000026764	965.917	-0.476828	0.155389	-3.06862	0.0021505	0.0223275	-0.393837	0.16144	2	ensembl_havana	49619298	49774778	ENSMUSG00000026764	Kif5c	16574	protein_coding
ENSMUSG00000026765	23.308	-0.821735	0.43632	-1.88333	0.0596555	0.236011	-0.181701	0.28374	2	ensembl_havana	49787688	49948849	ENSMUSG00000026765	Lypd6b	71897	protein_coding
ENSMUSG00000050447	115.655	-0.224327	0.222363	-1.00883	0.313056	0.604206	-0.104274	0.163124	2	ensembl_havana	50066429	50193569	ENSMUSG00000050447	Lypd6	320343	protein_coding
ENSMUSG00000026766	2271.03	-0.0677591	0.0941077	-0.720017	0.471514	0.740114	-0.0551765	0.0856005	2	ensembl_havana	50279881	50296801	ENSMUSG00000026766	Mmadhc	109129	protein_coding
ENSMUSG00000081457	3.2329	-0.774049	1.14369	-0.676803	0.498531		-0.0216467	0.193012	2	havana	50521682	50521860	ENSMUSG00000081457	Gm13488		processed_pseudogene
ENSMUSG00000083449	5.2277	-0.573315	0.953336	-0.601378	0.547588		-0.0227871	0.192008	2	havana	50522124	50522987	ENSMUSG00000083449	Gm13487		processed_pseudogene
ENSMUSG00000083270	4.54634	-0.147464	0.983495	-0.149939	0.880813		-0.00545945	0.190398	2	havana	50909684	50911849	ENSMUSG00000083270	Gm13498	227885	processed_pseudogene
ENSMUSG00000017144	940.984	-0.0776815	0.14403	-0.539343	0.589651	0.817028	-0.0506508	0.117673	2	ensembl_havana	51130438	51149111	ENSMUSG00000017144	Rnd3	74194	protein_coding
ENSMUSG00000086007	73.8434	0.616917	0.332335	1.85631	0.0634093	0.245231	0.222996	0.285626	2	havana	51420984	51438785	ENSMUSG00000086007	1700057H21Rik	73375	lincRNA
ENSMUSG00000087701	157.183	-0.0388866	0.184913	-0.210297	0.833436	0.936215	-0.0202768	0.134343	2	havana	51871126	51871618	ENSMUSG00000087701	Gm13493		processed_pseudogene
ENSMUSG00000036249	254.759	-0.0549468	0.141615	-0.388002	0.698014	0.877338	-0.0359796	0.115377	2	ensembl_havana	51924448	51935163	ENSMUSG00000036249	Rbm43	71684	protein_coding
ENSMUSG00000026946	34.8816	0.0535705	0.411785	0.130093	0.896493	0.963933	0.00987262	0.175718	2	ensembl_havana	51948487	51973494	ENSMUSG00000026946	Nmi	64685	protein_coding
ENSMUSG00000053475	42.4531	0.351379	0.354203	0.992026	0.321185	0.610838	0.087452	0.190212	2	ensembl_havana	52038009	52056686	ENSMUSG00000053475	Tnfaip6	21930	protein_coding
ENSMUSG00000036202	28115.6	-0.105461	0.131068	-0.804625	0.421036	0.700422	-0.0746582	0.112189	2	ensembl_havana	52072832	52122383	ENSMUSG00000036202	Rif1	51869	protein_coding
ENSMUSG00000026950	258.694	1.35679	0.366364	3.70341	0.000212725	0.00379569	1.13406	0.404429	2	ensembl_havana	52136647	52378474	ENSMUSG00000026950	Neb	17996	protein_coding
ENSMUSG00000086447	34.6868	0.0252295	0.544781	0.0463114	0.963062	0.986254	0.00301763	0.182729	2	havana	52367063	52390307	ENSMUSG00000086447	Gm13522		antisense
ENSMUSG00000036093	2370.96	-0.0162344	0.105452	-0.15395	0.877649	0.954507	-0.012663	0.0927149	2	ensembl_havana	52397951	52424901	ENSMUSG00000036093	Arl5a	75423	protein_coding
ENSMUSG00000085315	9.57765	-0.326913	0.64742	-0.504948	0.613595	0.829928	-0.0270758	0.188315	2	havana	52425012	52434885	ENSMUSG00000085315	A430018G15Rik	115489452	processed_transcript
ENSMUSG00000017412	15.1227	1.01633	0.536208	1.89541	0.058038	0.232084	0.148169	0.2601	2	ensembl_havana	52428320	52676831	ENSMUSG00000017412	Cacnb4	12298	protein_coding
ENSMUSG00000025201	14.3126	-0.0136241	0.603408	-0.0225786	0.981986	0.99383	-0.00106994	0.184673	2	havana	52619754	52620185	ENSMUSG00000025201	Bloc1s2-ps		processed_pseudogene
ENSMUSG00000055371	2182.38	-0.141794	0.0933852	-1.51838	0.128918	0.37355	-0.118509	0.0877023	2	ensembl_havana	52691664	52742281	ENSMUSG00000055371	Stam2	56324	protein_coding
ENSMUSG00000036053	2046.23	-0.00757551	0.133152	-0.0568937	0.95463	0.983982	-0.00498512	0.109795	2	ensembl_havana	52857860	53133804	ENSMUSG00000036053	Fmnl2	71409	protein_coding
ENSMUSG00000061136	9666.27	0.0113407	0.122761	0.0923804	0.926396	0.973607	0.00824306	0.103768	2	ensembl_havana	53134704	53191702	ENSMUSG00000061136	Prpf40a	56194	protein_coding
ENSMUSG00000026960	1816.68	-0.169598	0.0895269	-1.89438	0.0581742	0.232467	-0.144969	0.085602	2	ensembl_havana	53191726	53219220	ENSMUSG00000026960	Arl6ip6	65103	protein_coding
ENSMUSG00000083287	28.3969	-0.397424	0.429459	-0.925407	0.354754	0.643146	-0.0707183	0.191712	2	havana	53696121	53696804	ENSMUSG00000083287	Gm13502		processed_pseudogene
ENSMUSG00000075334	51.6302	-0.496564	0.29159	-1.70295	0.0885766	0.302527	-0.200291	0.242351	2	ensembl_havana	54084093	54085552	ENSMUSG00000075334	Rprm	67874	protein_coding
ENSMUSG00000060988	3.27092	-0.354435	1.18265	-0.299696	0.764409		-0.0092555	0.191727	2	ensembl_havana	54436317	55118309	ENSMUSG00000060988	Galnt13	271786	protein_coding
ENSMUSG00000026824	203.39	-4.25647	0.697672	-6.10096	1.05436e-09	1.1998e-07	-4.0102	0.721556	2	ensembl_havana	55435970	55598145	ENSMUSG00000026824	Kcnj3	16519	protein_coding
ENSMUSG00000026826	61.0939	0.844262	0.317022	2.6631	0.00774244	0.0593656	0.553314	0.38431	2	ensembl_havana	57106830	57124003	ENSMUSG00000026826	Nr4a2	18227	protein_coding
ENSMUSG00000084938	1.68425	1.06682	1.61781	0.65942	0.509626		0.0154003	0.193476	2	havana	57127479	57181754	ENSMUSG00000084938	BB557941	767815	processed_transcript
ENSMUSG00000054181	13.9736	-0.318643	0.53162	-0.599381	0.548919	0.792212	-0.0379187	0.18688	2	ensembl_havana	57236227	57238508	ENSMUSG00000054181	A930012O16Rik		processed_transcript
ENSMUSG00000026827	6392.75	0.480755	0.121907	3.94362	8.02614e-05	0.00176585	0.431916	0.124863	2	ensembl_havana	57237635	57370719	ENSMUSG00000026827	Gpd2	14571	protein_coding
ENSMUSG00000081642	14.9362	-0.0940953	0.586749	-0.160367	0.872592	0.952328	-0.00912065	0.18443	2	havana	57628989	57629228	ENSMUSG00000081642	Gm13532		processed_pseudogene
ENSMUSG00000053472	13.6	-0.587372	0.637893	-0.9208	0.357155	0.645323	-0.0508697	0.194584	2	ensembl_havana	58108060	58108572	ENSMUSG00000053472	Gm13534		processed_pseudogene
ENSMUSG00000086995	1.7785	-0.680777	1.8059	-0.376975	0.706192		-0.00776812	0.193098	2	havana	58276779	58286902	ENSMUSG00000086995	Gm13544	100502932	antisense
ENSMUSG00000026836	299.965	0.121826	0.198114	0.614928	0.538602	0.78597	0.0611506	0.143763	2	ensembl_havana	58388644	58567157	ENSMUSG00000026836	Acvr1	11477	protein_coding
ENSMUSG00000026839	13.2369	-0.503893	0.563997	-0.893432	0.371626	0.659334	-0.0550254	0.193519	2	ensembl_havana	58567298	58792971	ENSMUSG00000026839	Upp2	76654	protein_coding
ENSMUSG00000036641	6.22041	0.657914	0.851701	0.772471	0.439835		0.033004	0.193068	2	ensembl_havana	58821070	59160683	ENSMUSG00000036641	Ccdc148	227933	protein_coding
ENSMUSG00000026991	4664.17	-0.0956782	0.0967224	-0.989204	0.322563	0.612375	-0.0773853	0.0884179	2	ensembl_havana	59160850	59355208	ENSMUSG00000026991	Pkp4	227937	protein_coding
ENSMUSG00000087455	55.8584	0.549447	0.434037	1.2659	0.205549	0.486629	0.101534	0.208611	2	havana	59382502	59387471	ENSMUSG00000087455	5330411J11Rik	76676	processed_transcript
ENSMUSG00000081157	7.67479	-0.0434526	0.709856	-0.0612132	0.951189		-0.00289931	0.187151	2	havana	59564268	59564684	ENSMUSG00000081157	Gm13552		processed_pseudogene
ENSMUSG00000035168	4256.87	-0.00839469	0.130639	-0.0642586	0.948764	0.981938	-0.00563642	0.108375	2	ensembl_havana	59612042	59846149	ENSMUSG00000035168	Tanc1	66860	protein_coding
ENSMUSG00000026988	458.822	-0.288697	0.125283	-2.30435	0.021203	0.12241	-0.231761	0.122838	2	ensembl_havana	59852364	59882591	ENSMUSG00000026988	Wdsub1	72137	protein_coding
ENSMUSG00000026987	1176.68	-0.0395876	0.227909	-0.173699	0.862102	0.948527	-0.0164219	0.148174	2	ensembl_havana	59899363	60209839	ENSMUSG00000026987	Baz2b	407823	protein_coding
ENSMUSG00000026977	6301.3	-0.138713	0.0915622	-1.51496	0.129782	0.375048	-0.116587	0.0860975	2	ensembl_havana	60209887	60250676	ENSMUSG00000026977	Marchf7	57438	protein_coding
ENSMUSG00000060703	85.5928	0.481416	0.270024	1.78286	0.0746085	0.272829	0.220967	0.241687	2	ensembl_havana	60251993	60284488	ENSMUSG00000060703	Cd302	66205	protein_coding
ENSMUSG00000080198	5.84954	-0.390077	0.812465	-0.480116	0.631145		-0.0210324	0.190262	2	havana	60274944	60275574	ENSMUSG00000080198	Rpl10a-ps4	625861	processed_pseudogene
ENSMUSG00000026980	1853.13	-0.0950702	0.252124	-0.377078	0.706116	0.882076	-0.0354519	0.156153	2	ensembl_havana	60292103	60383303	ENSMUSG00000026980	Ly75	17076	protein_coding
ENSMUSG00000086196	2.90839	-0.799019	1.24177	-0.643453	0.51993		-0.0189553	0.193025	2	havana	60338188	60371234	ENSMUSG00000086196	Gm13571		antisense
ENSMUSG00000087283	44.9151	-0.256793	0.372897	-0.688644	0.491048	0.754779	-0.0561903	0.180703	2	havana	60411525	60412579	ENSMUSG00000087283	Gm13580	100039176	antisense
ENSMUSG00000054580	8.20255	-0.345789	0.819137	-0.422138	0.672924	0.863175	-0.0183516	0.189958	2	ensembl_havana	60417543	60553308	ENSMUSG00000054580	Pla2r1	18779	protein_coding
ENSMUSG00000026970	2166.76	-0.243875	0.135593	-1.79858	0.0720848	0.266201	-0.182153	0.127496	2	ensembl_havana	60750193	60963192	ENSMUSG00000026970	Rbms1	56878	protein_coding
ENSMUSG00000064289	370.162	-0.128675	0.137467	-0.93604	0.349253	0.637816	-0.0883184	0.117487	2	ensembl_havana	61578585	61654171	ENSMUSG00000064289	Tank	21353	protein_coding
ENSMUSG00000026914	6286.35	-0.0612693	0.108941	-0.562409	0.573837	0.807422	-0.0467504	0.0959428	2	ensembl_havana	61711694	61800376	ENSMUSG00000026914	Psmd14	59029	protein_coding
ENSMUSG00000087794	2.57746	0.415488	1.19356	0.348107	0.727759		0.0108153	0.191872	2	ensembl	61798180	61798296	ENSMUSG00000087794	Gm25966		rRNA
ENSMUSG00000035033	3.33849	2.33616	1.45185	1.60908	0.107598		0.0422006	0.199196	2	ensembl_havana	61802930	61814114	ENSMUSG00000035033	Tbr1	21375	protein_coding
ENSMUSG00000026904	3.57152	0.186724	1.08521	0.172063	0.863388		0.00586889	0.191059	2	ensembl_havana	62046462	62326730	ENSMUSG00000026904	Slc4a10	94229	protein_coding
ENSMUSG00000035000	707.005	0.49007	0.250855	1.9536	0.0507487	0.212051	0.261299	0.246292	2	ensembl_havana	62330073	62412231	ENSMUSG00000035000	Dpp4	13482	protein_coding
ENSMUSG00000087681	1.79683	-0.702037	1.86567	-0.376292	0.7067		-0.00749179	0.193156	2	havana	62436880	62441142	ENSMUSG00000087681	Gm13565		lincRNA
ENSMUSG00000026893	893.969	0.174332	0.247595	0.704105	0.481368	0.746773	0.0683928	0.161383	2	ensembl_havana	62664285	62694109	ENSMUSG00000026893	Gca	227960	protein_coding
ENSMUSG00000059742	1.64452	0.292328	1.46901	0.198997	0.842265		0.00504519	0.192387	2	ensembl_havana	62693414	63184287	ENSMUSG00000059742	Kcnh7	170738	protein_coding
ENSMUSG00000075324	107.614	-1.95536	0.241386	-8.10057	5.47043e-16	2.5405e-13	-1.89487	0.244759	2	ensembl_havana	63971507	64098038	ENSMUSG00000075324	Fign	60344	protein_coding
ENSMUSG00000082127	198.066	-0.506812	0.203928	-2.48525	0.012946	0.0864896	-0.360407	0.21599	2	havana	64474745	64474949	ENSMUSG00000082127	Gm13577		processed_pseudogene
ENSMUSG00000084104	1.92816	-1.09096	1.57041	-0.694697	0.487245		-0.0162303	0.193548	2	havana	64867999	64868588	ENSMUSG00000084104	Gm13578		processed_pseudogene
ENSMUSG00000026888	85.5925	0.0998963	0.327639	0.304898	0.760444	0.90557	0.0263276	0.168584	2	ensembl_havana	64912476	65024987	ENSMUSG00000026888	Grb14	50915	protein_coding
ENSMUSG00000034903	169.061	0.420452	0.262447	1.60204	0.109146	0.342495	0.187005	0.217732	2	ensembl_havana	65088339	65239403	ENSMUSG00000034903	Cobll1	319876	protein_coding
ENSMUSG00000057182	291.853	0.554756	0.302038	1.83671	0.0662533	0.251865	0.229445	0.27111	2	ensembl_havana	65457118	65567627	ENSMUSG00000057182	Scn3a	20269	protein_coding
ENSMUSG00000075318	22.5869	-0.400097	0.472851	-0.846137	0.397476	0.68252	-0.0597386	0.19057	2	ensembl_havana	65620771	65767447	ENSMUSG00000075318	Scn2a	110876	protein_coding
ENSMUSG00000044647	259.718	-0.212282	0.21208	-1.00095	0.31685	0.606566	-0.10344	0.158758	2	ensembl_havana	65845767	66031546	ENSMUSG00000044647	Csrnp3	77771	protein_coding
ENSMUSG00000026994	138.424	-1.32985	0.377966	-3.51845	0.000434078	0.00665366	-1.07968	0.424629	2	ensembl_havana	66082766	66124994	ENSMUSG00000026994	Galnt3	14425	protein_coding
ENSMUSG00000034848	489.186	-0.580621	0.156641	-3.7067	0.000209975	0.00376618	-0.505371	0.163388	2	ensembl_havana	66184327	66256617	ENSMUSG00000034848	Ttc21b	73668	protein_coding
ENSMUSG00000064329	9.69949	-0.864099	0.643401	-1.34302	0.179266	0.450532	-0.0769412	0.20655	2	ensembl_havana	66270778	66440840	ENSMUSG00000064329	Scn1a	20265	protein_coding
ENSMUSG00000085386	2.33968	-2.73927	1.50815	-1.81632	0.0693216		-0.0497441	0.201771	2	havana	66409494	66421588	ENSMUSG00000085386	Gm13630		processed_transcript
ENSMUSG00000075316	26.0719	-0.167024	0.520691	-0.320773	0.748383	0.901849	-0.0203143	0.183065	2	ensembl_havana	66480080	66634962	ENSMUSG00000075316	Scn9a	20274	protein_coding
ENSMUSG00000027022	41.1035	0.000271485	0.408318	0.000664887	0.999469	0.999724	0.000228275	0.175204	2	ensembl_havana	67173834	67526615	ENSMUSG00000027022	Xirp2		protein_coding
ENSMUSG00000034780	51.1928	-0.620396	0.305539	-2.0305	0.0423062	0.188475	-0.27918	0.309421	2	ensembl_havana	67565871	68122689	ENSMUSG00000034780	B3galt1	26877	protein_coding
ENSMUSG00000027030	132.827	-0.452147	0.244202	-1.85153	0.0640933	0.24671	-0.236705	0.229667	2	ensembl_havana	68210445	68472268	ENSMUSG00000027030	Stk39	53416	protein_coding
ENSMUSG00000075312	2.55346	-1.33324	1.2532	-1.06387	0.287386		-0.0318429	0.195513	2	havana	68554555	68554929	ENSMUSG00000075312	Gm13597		processed_pseudogene
ENSMUSG00000082836	2.16007	-0.0663087	1.281	-0.051763	0.958718		-0.00143943	0.19179	2	havana	68831017	68831406	ENSMUSG00000082836	Gm13612		processed_pseudogene
ENSMUSG00000027035	1463.62	0.640829	0.159311	4.02252	5.75795e-05	0.00134966	0.56891	0.166062	2	ensembl_havana	68861441	69114282	ENSMUSG00000027035	Cers6	241447	protein_coding
ENSMUSG00000034738	35.7091	3.04118	0.797035	3.81561	0.000135846	0.00267995	2.55082	0.889159	2	ensembl_havana	69135800	69189330	ENSMUSG00000034738	Nostrin	329416	protein_coding
ENSMUSG00000005233	2845.77	0.0168834	0.0858457	0.196672	0.844084	0.940956	0.0140467	0.0785455	2	ensembl_havana	69193895	69206194	ENSMUSG00000005233	Spc25	66442	protein_coding
ENSMUSG00000005232	24.1816	1.35004	0.484093	2.78881	0.00529021	0.044388	0.858621	0.660478	2	ensembl_havana	69211073	69227841	ENSMUSG00000005232	G6pc2	14378	protein_coding
ENSMUSG00000027048	12.5187	0.220234	0.676416	0.32559	0.744735	0.900357	0.0168867	0.187457	2	ensembl_havana	69238282	69342616	ENSMUSG00000027048	Abcb11	27413	protein_coding
ENSMUSG00000027068	2.40893	1.16045	1.35345	0.857404	0.391222		0.0237793	0.194127	2	ensembl_havana	69380445	69404533	ENSMUSG00000027068	Dhrs9	241452	protein_coding
ENSMUSG00000027070	4457.3	0.291661	0.302633	0.963745	0.335174	0.624788	0.0929508	0.183174	2	ensembl_havana	69424340	69586065	ENSMUSG00000027070	Lrp2	14725	protein_coding
ENSMUSG00000063145	414.482	-0.213493	0.120803	-1.76729	0.07718	0.278677	-0.166247	0.113581	2	ensembl_havana	69647171	69667571	ENSMUSG00000063145	Bbs5	72569	protein_coding
ENSMUSG00000075307	11.9409	-0.883125	0.619607	-1.4253	0.154071	0.414049	-0.0852448	0.210667	2	ensembl_havana	69670120	69684230	ENSMUSG00000075307	Klhl41	228003	protein_coding
ENSMUSG00000027086	1470.92	-0.0618909	0.0930037	-0.665467	0.505752	0.765061	-0.0504555	0.0846205	2	ensembl_havana	69686815	69713516	ENSMUSG00000027086	Fastkd1	320720	protein_coding
ENSMUSG00000042133	6712.69	-0.124551	0.0960117	-1.29725	0.194547	0.472094	-0.101484	0.0889909	2	ensembl_havana	69722545	69754012	ENSMUSG00000042133	Ppig	228005	protein_coding
ENSMUSG00000070883	57.6642	-0.482837	0.30165	-1.60065	0.109454	0.342904	-0.177545	0.231769	2	ensembl_havana	69758033	69789575	ENSMUSG00000070883	Ccdc173	75051	protein_coding
ENSMUSG00000083007	14.2922	0.334588	0.606924	0.551286	0.581438	0.812066	0.0314437	0.188115	2	havana	69766182	69766806	ENSMUSG00000083007	Gm13623		processed_pseudogene
ENSMUSG00000027088	397.032	-0.1603	0.125141	-1.28095	0.20021	0.479204	-0.118304	0.112332	2	ensembl_havana	69789623	69800005	ENSMUSG00000027088	Phospho2	73373	protein_coding
ENSMUSG00000042155	249.088	-0.19104	0.168458	-1.13405	0.256773	0.54732	-0.116382	0.140189	2	ensembl_havana	69821944	69836651	ENSMUSG00000042155	Klhl23	277396	protein_coding
ENSMUSG00000068882	14201.7	-0.111683	0.0853819	-1.30804	0.190859	0.4664	-0.0951026	0.0801147	2	ensembl_havana	69861562	69871846	ENSMUSG00000068882	Ssb	20823	protein_coding
ENSMUSG00000051730	1231.91	0.313729	0.0956544	3.27982	0.00103875	0.0129433	0.280543	0.095781	2	ensembl_havana	69871198	69885615	ENSMUSG00000051730	Mettl5	75422	protein_coding
ENSMUSG00000089902	15.1513	0.141769	0.556996	0.254524	0.799091	0.92159	0.0155183	0.183962	2	havana	69871412	69872202	ENSMUSG00000089902	Gm13625		processed_transcript
ENSMUSG00000085735	20.2603	-0.22852	0.47855	-0.477525	0.632988	0.840284	-0.0324203	0.183053	2	havana	69885728	69888155	ENSMUSG00000085735	Mettl5os		antisense
ENSMUSG00000044308	5275.63	0.286881	0.0895434	3.20382	0.00135617	0.0156615	0.257783	0.0892315	2	ensembl_havana	69897246	70024013	ENSMUSG00000044308	Ubr3	68795	protein_coding
ENSMUSG00000042064	19.5373	-0.16453	0.516393	-0.318614	0.750019	0.902209	-0.0200246	0.182848	2	ensembl_havana	70039126	70429198	ENSMUSG00000042064	Myo3b	329421	protein_coding
ENSMUSG00000047965	107.553	-0.182707	0.207803	-0.879229	0.379277	0.667086	-0.0893924	0.153285	2	ensembl_havana	70458982	70459560	ENSMUSG00000047965	Rpl9-ps7		processed_pseudogene
ENSMUSG00000075304	12.0122	-1.66915	0.725467	-2.30079	0.0214036	0.123088	-0.132209	0.256624	2	ensembl_havana	70474923	70477729	ENSMUSG00000075304	Sp5	64406	protein_coding
ENSMUSG00000087264	2.9735	-0.308885	1.1331	-0.272602	0.785159		-0.00874929	0.19147	2	havana	70489940	70563357	ENSMUSG00000087264	Gad1os	68986	antisense
ENSMUSG00000086515	1.75648	0.44074	1.58472	0.278119	0.780921		0.00656148	0.192687	2	havana	70503433	70509199	ENSMUSG00000086515	Erich2os		antisense
ENSMUSG00000075302	3.70698	0.28927	1.09539	0.26408	0.791719		0.00890589	0.191279	2	ensembl_havana	70508819	70540884	ENSMUSG00000075302	Erich2	66748	protein_coding
ENSMUSG00000070880	100.8	0.995132	0.326849	3.04463	0.00232969	0.0238991	0.74247	0.380732	2	ensembl_havana	70553072	70602014	ENSMUSG00000070880	Gad1	14415	protein_coding
ENSMUSG00000014959	3364.05	0.21233	0.0821073	2.58601	0.00970953	0.0703072	0.189372	0.0803964	2	ensembl_havana	70661576	70712636	ENSMUSG00000014959	Gorasp2	70231	protein_coding
ENSMUSG00000041997	5658.65	-0.273761	0.131835	-2.07655	0.0378432	0.174989	-0.211143	0.127218	2	ensembl_havana	70712407	70825728	ENSMUSG00000041997	Tlk1	228012	protein_coding
ENSMUSG00000041975	845.736	-0.152035	0.171325	-0.887409	0.374859	0.663289	-0.0888828	0.136676	2	ensembl_havana	70964561	71055583	ENSMUSG00000041975	Mettl8	228019	protein_coding
ENSMUSG00000041966	1897.82	-0.154584	0.0970854	-1.59225	0.111329	0.346652	-0.128121	0.0912473	2	ensembl_havana	71055328	71099142	ENSMUSG00000041966	Dcaf17	75763	protein_coding
ENSMUSG00000027015	25.8479	0.0103639	0.41297	0.025096	0.979978	0.993139	0.00204185	0.175571	2	ensembl_havana	71117923	71142926	ENSMUSG00000027015	Cybrd1	73649	protein_coding
ENSMUSG00000027012	5253.96	-0.126514	0.0874576	-1.44658	0.148015	0.403788	-0.107421	0.0822948	2	ensembl_havana	71211706	71263303	ENSMUSG00000027012	Dync1i2	13427	protein_coding
ENSMUSG00000027010	2576.35	-0.030575	0.110745	-0.276085	0.782483	0.915499	-0.0214733	0.0963964	2	ensembl_havana	71271063	71367749	ENSMUSG00000027010	Slc25a12	78830	protein_coding
ENSMUSG00000027018	18333.3	-0.0169184	0.100962	-0.167573	0.866919	0.949803	-0.0129933	0.0896144	2	ensembl_havana	71388958	71441622	ENSMUSG00000027018	Hat1	107435	protein_coding
ENSMUSG00000086846	2.42766	-0.144457	1.34348	-0.107525	0.914373		-0.00291098	0.191999	2	havana	71412537	71412917	ENSMUSG00000086846	Gm13642		processed_pseudogene
ENSMUSG00000041921	821.237	0.147905	0.172582	0.857016	0.391436	0.67755	0.0860399	0.136817	2	ensembl_havana	71453276	71525194	ENSMUSG00000041921	Metap1d	66559	protein_coding
ENSMUSG00000041911	4.30264	-0.0934854	0.977354	-0.0956515	0.923797		-0.00344589	0.1903	2	ensembl_havana	71528113	71533981	ENSMUSG00000041911	Dlx1	13390	protein_coding
ENSMUSG00000023391	5.13504	-0.218232	1.01594	-0.214808	0.829917		-0.00758825	0.190739	2	ensembl_havana	71543408	71546754	ENSMUSG00000023391	Dlx2	13392	protein_coding
ENSMUSG00000064263	112.701	1.27193	0.315246	4.03472	5.46668e-05	0.00129208	1.10323	0.339063	2	ensembl_havana	71719417	71730966	ENSMUSG00000064263	Platr26	381371	lincRNA
ENSMUSG00000027111	6619.71	0.145635	0.128661	1.13193	0.257663	0.548017	0.105664	0.113543	2	ensembl_havana	71745616	71858416	ENSMUSG00000027111	Itga6	16403	protein_coding
ENSMUSG00000086641	4.06697	-0.28605	1.38688	-0.206254	0.836592		-0.00539882	0.192217	2	havana	71747507	71750200	ENSMUSG00000086641	Gm13663		processed_transcript
ENSMUSG00000084794	7.72194	0.00782096	1.00843	0.00775558	0.993812		0.000394326	0.190478	2	havana	71749925	71759801	ENSMUSG00000084794	Gm13662		processed_transcript
ENSMUSG00000006494	4996.5	-0.0724777	0.12485	-0.580516	0.561567	0.799514	-0.0525458	0.10662	2	ensembl_havana	71873224	71903858	ENSMUSG00000006494	Pdk1	228026	protein_coding
ENSMUSG00000049044	135.375	-0.667172	0.288158	-2.3153	0.0205966	0.119814	-0.378507	0.330991	2	ensembl_havana	71981240	72257474	ENSMUSG00000049044	Rapgef4	56508	protein_coding
ENSMUSG00000004085	811.596	0.0702085	0.165266	0.424822	0.670967	0.861872	0.0414539	0.12758	2	ensembl_havana	72285637	72442610	ENSMUSG00000004085	Map3k20	65964	protein_coding
ENSMUSG00000055612	7075.15	-0.0958216	0.0816517	-1.17354	0.240579	0.529101	-0.0824734	0.0766196	2	ensembl_havana	72476159	72486893	ENSMUSG00000055612	Cdca7	66953	protein_coding
ENSMUSG00000081957	2.77231	0.199788	1.15747	0.172607	0.86296		0.00553062	0.191403	2	havana	72633936	72634607	ENSMUSG00000081957	Ak3l2-ps		processed_pseudogene
ENSMUSG00000085427	4.49221	1.27711	1.22785	1.04011	0.298288		0.0311614	0.195365	2	havana	72745846	72813717	ENSMUSG00000085427	6430710C18Rik	76218	lincRNA
ENSMUSG00000027109	5524.67	-0.066685	0.118695	-0.561818	0.57424	0.807915	-0.0487924	0.102517	2	ensembl_havana	72936427	72980446	ENSMUSG00000027109	Sp3	20687	protein_coding
ENSMUSG00000079286	5.01519	-0.306462	0.842388	-0.363801	0.716007		-0.0153641	0.189882	2	ensembl	72971548	72986716	ENSMUSG00000079286	Gm11084		protein_coding
ENSMUSG00000063714	137.796	0.329209	0.195316	1.68552	0.0918882	0.309409	0.197015	0.177273	2	ensembl_havana	72979424	72988677	ENSMUSG00000063714	Sp3os		antisense
ENSMUSG00000027108	7309.5	-0.0605082	0.0904521	-0.668953	0.503525	0.763386	-0.0497567	0.08267	2	ensembl_havana	73092801	73218924	ENSMUSG00000027108	Ola1	67059	protein_coding
ENSMUSG00000068859	6.64256	-0.0375071	0.930779	-0.0402965	0.967857		-0.0014471	0.189912	2	ensembl_havana	73271925	73284706	ENSMUSG00000068859	Sp9	381373	protein_coding
ENSMUSG00000041777	794.472	-0.140116	0.115103	-1.21731	0.223488	0.509051	-0.107205	0.104027	2	ensembl_havana	73283105	73312701	ENSMUSG00000041777	Cir1	66935	protein_coding
ENSMUSG00000008226	979.869	-0.0724942	0.109466	-0.662252	0.50781	0.766757	-0.0553131	0.096671	2	ensembl_havana	73312601	73337818	ENSMUSG00000008226	Scrn3	74616	protein_coding
ENSMUSG00000041762	47.6801	-0.344176	0.352413	-0.976625	0.328755	0.618458	-0.085764	0.189182	2	ensembl_havana	73341506	73386572	ENSMUSG00000041762	Gpr155	68526	protein_coding
ENSMUSG00000085519	2.94436	0.0144771	1.11878	0.0129401	0.989676		0.00048691	0.191109	2	havana	73357268	73364333	ENSMUSG00000085519	Gm13703		antisense
ENSMUSG00000075284	241.942	-0.387404	0.143939	-2.69145	0.00711424	0.055515	-0.312286	0.146215	2	ensembl_havana	73429610	73529734	ENSMUSG00000075284	Wipf1	215280	protein_coding
ENSMUSG00000027107	1.66995	-0.971588	1.80144	-0.539339	0.589653		-0.0110936	0.19335	2	ensembl_havana	73563215	73580338	ENSMUSG00000027107	Chrna1	11435	protein_coding
ENSMUSG00000086382	8.04632	-0.968405	0.777614	-1.24535	0.213001	0.495868	-0.0586826	0.200781	2	havana	73584850	73589208	ENSMUSG00000086382	Chrna1os	102633437	antisense
ENSMUSG00000086544	5.9143	0.0117237	0.806101	0.0145437	0.988396		0.000740136	0.188579	2	havana	73596526	73616012	ENSMUSG00000086544	Chn1os3	329427	antisense
ENSMUSG00000056486	900.444	0.108583	0.104495	1.03913	0.298745	0.589058	0.0860952	0.0947354	2	ensembl_havana	73610660	73775346	ENSMUSG00000056486	Chn1	108699	protein_coding
ENSMUSG00000027104	3527.61	-0.188006	0.122493	-1.53483	0.124825	0.367209	-0.143352	0.112829	2	ensembl_havana	73816509	73892639	ENSMUSG00000027104	Atf2	11909	protein_coding
ENSMUSG00000018770	9065.67	0.0990717	0.0868891	1.14021	0.2542	0.544354	0.0837839	0.0809452	2	ensembl_havana	73908447	73911326	ENSMUSG00000018770	Atp5g3	228033	protein_coding
ENSMUSG00000009207	1272.26	0.187834	0.0999215	1.87981	0.0601337	0.237153	0.156605	0.0951881	2	ensembl_havana	74520291	74579435	ENSMUSG00000009207	Lnpk	69605	protein_coding
ENSMUSG00000075279	17.6197	0.538048	0.47839	1.1247	0.260714	0.550688	0.0821478	0.200945	2	havana	74591330	74591909	ENSMUSG00000075279	Mrpl23-ps1	100040519	processed_pseudogene
ENSMUSG00000001819	38.238	0.322149	0.429632	0.749826	0.45336	0.726415	0.0564278	0.186206	2	ensembl_havana	74668310	74671599	ENSMUSG00000001819	Hoxd13	15433	protein_coding
ENSMUSG00000043342	2.67865	2.62712	1.62146	1.62021	0.105186		0.0391739	0.198527	2	ensembl_havana	74697727	74700208	ENSMUSG00000043342	Hoxd9	15438	protein_coding
ENSMUSG00000027102	9.2506	1.37828	0.713004	1.93306	0.0532285	0.219177	0.110941	0.233137	2	ensembl_havana	74704615	74707933	ENSMUSG00000027102	Hoxd8	15437	protein_coding
ENSMUSG00000101174	1.9427	3.15297	1.75424	1.79734	0.0722823		0.0392739	0.198744	2	ensembl_havana	74711929	74729160	ENSMUSG00000101174	Hoxd4	15436	protein_coding
ENSMUSG00000075277	10.8208	0.353506	0.812209	0.435241	0.663388	0.856921	0.0193597	0.189997	2	ensembl_havana	74748422	74762896	ENSMUSG00000075277	Haglr		bidirectional_promoter_lncRNA
ENSMUSG00000042448	13.1197	-0.436283	0.736944	-0.592016	0.55384	0.795003	-0.0284204	0.190455	2	ensembl_havana	74762980	74765142	ENSMUSG00000042448	Hoxd1	15429	protein_coding
ENSMUSG00000027099	2000.42	0.00962944	0.100291	0.0960153	0.923508	0.973515	0.00769845	0.0891121	2	ensembl_havana	74825803	74878431	ENSMUSG00000027099	Mtx2	53375	protein_coding
ENSMUSG00000081406	319.823	-0.0525979	0.173605	-0.302974	0.761909	0.905973	-0.029088	0.130314	2	havana	75191073	75191822	ENSMUSG00000081406	Rps6-ps4	105244208	processed_pseudogene
ENSMUSG00000075276	5.11352	-0.220229	0.852827	-0.258235	0.796226		-0.0107711	0.189553	2	havana	75192277	75192759	ENSMUSG00000075276	Gm13653	108168770	processed_pseudogene
ENSMUSG00000082152	18.451	-0.0638091	0.494973	-0.128914	0.897425	0.964321	-0.00834128	0.180829	2	havana	75632638	75633382	ENSMUSG00000082152	Gm13655		processed_pseudogene
ENSMUSG00000059005	55447.8	-0.0710602	0.0876793	-0.810455	0.417679	0.698693	-0.0657551	0.0810391	2	ensembl_havana	75659261	75669407	ENSMUSG00000059005	Hnrnpa3	229279	protein_coding
ENSMUSG00000015839	2528.26	-0.0676497	0.0972118	-0.6959	0.486491	0.750665	-0.0543712	0.0878901	2	ensembl_havana	75675513	75704641	ENSMUSG00000015839	Nfe2l2	18024	protein_coding
ENSMUSG00000086813	20.8433	-0.425706	0.548781	-0.77573	0.437908	0.713027	-0.0484097	0.190615	2	havana	75777188	75782306	ENSMUSG00000086813	Gm13657		processed_transcript
ENSMUSG00000081833	6.89862	0.432506	0.799149	0.541208	0.588364		0.024449	0.190605	2	havana	75808358	75808814	ENSMUSG00000081833	Gm13669		processed_pseudogene
ENSMUSG00000042410	7303.24	-0.0743968	0.0817236	-0.910347	0.36264	0.650745	-0.0637949	0.0761626	2	ensembl_havana	75832177	75931350	ENSMUSG00000042410	Agps	228061	protein_coding
ENSMUSG00000075273	58.1738	-0.831523	0.272904	-3.04694	0.00231183	0.0237585	-0.633217	0.307491	2	ensembl_havana	75935849	75938585	ENSMUSG00000075273	Ttc30b	72421	protein_coding
ENSMUSG00000075272	4.06838	-0.541769	0.947971	-0.571504	0.567658		-0.0217703	0.191783	2	ensembl_havana	75975740	75978170	ENSMUSG00000075272	Ttc30a2	620631	protein_coding
ENSMUSG00000075271	319.961	-0.742066	0.146452	-5.06696	4.04228e-07	2.21205e-05	-0.688038	0.150837	2	ensembl_havana	75978247	75981967	ENSMUSG00000075271	Ttc30a1	78802	protein_coding
ENSMUSG00000075270	6.7218	0.380607	0.905342	0.420402	0.674192		0.016919	0.190696	2	ensembl_havana	75989141	76338774	ENSMUSG00000075270	Pde11a	241489	protein_coding
ENSMUSG00000056436	181.947	0.650037	0.302737	2.1472	0.0317772	0.157317	0.319836	0.331453	2	ensembl_havana	76353942	76360450	ENSMUSG00000056436	Cyct	13067	protein_coding
ENSMUSG00000042369	1471.37	-0.267439	0.11945	-2.23891	0.0251615	0.135862	-0.216493	0.116346	2	ensembl_havana	76369984	76383768	ENSMUSG00000042369	Rbm45	241490	protein_coding
ENSMUSG00000042359	64.6307	1.38823	0.350794	3.9574	7.57705e-05	0.00169086	1.1936	0.379348	2	ensembl_havana	76406508	76600647	ENSMUSG00000042359	Osbpl6	99031	protein_coding
ENSMUSG00000002731	359.892	-0.0037715	0.221016	-0.0170643	0.986385	0.994526	-0.00143699	0.14578	2	ensembl_havana	76629898	76648015	ENSMUSG00000002731	Prkra	23992	protein_coding
ENSMUSG00000075267	2.6833	-0.314959	1.15392	-0.272947	0.784894		-0.0085866	0.191566	2	ensembl_havana	76648476	76658556	ENSMUSG00000075267	Pjvk	381375	protein_coding
ENSMUSG00000002732	51.1108	0.279989	0.283906	0.986205	0.324033	0.61407	0.096587	0.180024	2	ensembl_havana	76663044	76673116	ENSMUSG00000002732	Fkbp7	14231	protein_coding
ENSMUSG00000002733	1628.39	0.0181055	0.083015	0.218099	0.827352	0.934489	0.0154137	0.0763719	2	ensembl_havana	76675281	76696828	ENSMUSG00000002733	Plekha3	83435	protein_coding
ENSMUSG00000051747	1668.41	0.526105	0.479094	1.09812	0.27215	0.562287	0.0800749	0.200376	2	ensembl_havana	76703980	76982547	ENSMUSG00000051747	Ttn	22138	protein_coding
ENSMUSG00000044033	212.567	0.882157	0.228705	3.85718	0.000114703	0.00233248	0.761001	0.244211	2	ensembl_havana	77009902	77170636	ENSMUSG00000044033	Ccdc141	545428	protein_coding
ENSMUSG00000042272	1441.72	-0.21026	0.125158	-1.67996	0.0929646	0.311812	-0.161615	0.116721	2	ensembl_havana	77180340	77280592	ENSMUSG00000042272	Sestd1	228071	protein_coding
ENSMUSG00000081611	17.7873	-0.0340772	0.614057	-0.0554953	0.955744	0.98427	-0.00307891	0.184963	2	havana	77291331	77292440	ENSMUSG00000081611	Gm13651		processed_pseudogene
ENSMUSG00000027016	6.02399	0.222353	0.891983	0.249279	0.803145		0.0101673	0.189904	2	ensembl_havana	77410634	77819639	ENSMUSG00000027016	Zfp385b	241494	protein_coding
ENSMUSG00000027014	3547.89	-0.121771	0.0833016	-1.46181	0.143794	0.396728	-0.104576	0.0787042	2	ensembl_havana	77881159	77946375	ENSMUSG00000027014	Cwc22	80744	protein_coding
ENSMUSG00000082701	2.30732	0.538561	1.43619	0.374992	0.707666		0.009683	0.192582	2	havana	78512698	78513336	ENSMUSG00000082701	Gm14460	383717	processed_pseudogene
ENSMUSG00000027011	1792.21	-0.0657737	0.180743	-0.363908	0.715927	0.886822	-0.0351507	0.133734	2	ensembl_havana	78868124	78921293	ENSMUSG00000027011	Ube2e3	22193	protein_coding
ENSMUSG00000027009	8.77209	-0.649791	0.676132	-0.961042	0.336531	0.626095	-0.0507986	0.195492	2	ensembl_havana	79255426	79333123	ENSMUSG00000027009	Itga4	16401	protein_coding
ENSMUSG00000075256	32.6636	0.6052	0.433137	1.39725	0.162339	0.42683	0.115736	0.217998	2	ensembl_havana	79330543	79456785	ENSMUSG00000075256	Cerkl	228094	protein_coding
ENSMUSG00000034701	319.365	-0.469701	0.207468	-2.26397	0.0235761	0.130722	-0.313543	0.214911	2	ensembl_havana	79452521	79456751	ENSMUSG00000034701	Neurod1	18012	protein_coding
ENSMUSG00000027007	793.827	0.297298	0.109364	2.71844	0.0065591	0.0520818	0.253997	0.108658	2	ensembl_havana	79635352	79672966	ENSMUSG00000027007	Itprid2	70599	protein_coding
ENSMUSG00000059173	5.87181	-2.47509	1.0001	-2.47485	0.0133291		-0.103402	0.232954	2	ensembl_havana	79834453	80129458	ENSMUSG00000059173	Pde1a	18573	protein_coding
ENSMUSG00000027006	3193.52	0.0402906	0.126225	0.319197	0.749577	0.902209	0.0247463	0.106213	2	ensembl_havana	80315466	80354043	ENSMUSG00000027006	Dnajc10	66861	protein_coding
ENSMUSG00000085921	1.54451	2.7682	1.87149	1.47914	0.139102		0.028971	0.196215	2	havana	80394897	80400525	ENSMUSG00000085921	Gm13752		antisense
ENSMUSG00000027004	3.64233	1.97215	1.25047	1.57713	0.114766		0.0486673	0.200714	2	ensembl_havana	80411970	80447625	ENSMUSG00000027004	Frzb	20378	protein_coding
ENSMUSG00000027002	8672.23	-0.0360089	0.0811688	-0.44363	0.65731	0.853425	-0.0310845	0.0750745	2	ensembl_havana	80500512	80581380	ENSMUSG00000027002	Nckap1	50884	protein_coding
ENSMUSG00000081487	3.05488	0.102023	1.4126	0.0722233	0.942424		0.00194598	0.192182	2	havana	80549712	80550396	ENSMUSG00000081487	Gm13689	100416042	processed_pseudogene
ENSMUSG00000083284	1.62459	-0.352497	1.56754	-0.224873	0.822078		-0.0053173	0.192601	2	havana	80602733	80603340	ENSMUSG00000083284	Gm13688		processed_pseudogene
ENSMUSG00000027001	160.171	-0.0385739	0.228268	-0.168985	0.865808	0.94974	-0.016013	0.148264	2	ensembl_havana	80617045	80632361	ENSMUSG00000027001	Dusp19	68082	protein_coding
ENSMUSG00000026999	1941.98	0.0135857	0.0895563	0.1517	0.879423	0.955661	0.0112601	0.081341	2	ensembl_havana	80617236	80658906	ENSMUSG00000026999	Nup35	69482	protein_coding
ENSMUSG00000086436	5.23238	0.0251067	0.88196	0.0284669	0.97729		0.00125544	0.189437	2	havana	80629284	80629568	ENSMUSG00000086436	Gm13690		processed_pseudogene
ENSMUSG00000064193	2595.78	-0.719302	0.142604	-5.04407	4.55739e-07	2.46257e-05	-0.667483	0.146748	2	havana	80837141	80838442	ENSMUSG00000064193	Gm4735		processed_pseudogene
ENSMUSG00000081400	44.795	-0.0116192	0.371932	-0.0312401	0.975078	0.990856	-0.00230393	0.171991	2	havana	83353157	83353949	ENSMUSG00000081400	Gm13680	545429	processed_pseudogene
ENSMUSG00000027091	7141.91	-0.189446	0.0969962	-1.95313	0.0508047	0.212145	-0.159409	0.0927948	2	ensembl_havana	83644435	83664622	ENSMUSG00000027091	Zc3h15	69082	protein_coding
ENSMUSG00000027087	1261.6	0.199445	0.14467	1.37862	0.168012	0.434456	0.138379	0.128733	2	ensembl_havana	83724397	83806916	ENSMUSG00000027087	Itgav	16410	protein_coding
ENSMUSG00000048388	185.289	-0.395855	0.196387	-2.01569	0.043832	0.19302	-0.255066	0.192729	2	ensembl_havana	83812636	83883486	ENSMUSG00000048388	Fam171b	241520	protein_coding
ENSMUSG00000059588	19.7533	-1.19203	0.557632	-2.13767	0.0325434	0.159468	-0.16895	0.29161	2	ensembl_havana	84330626	84425411	ENSMUSG00000059588	Calcrl	54598	protein_coding
ENSMUSG00000027082	2132.17	0.262996	0.234354	1.12222	0.26177	0.551767	0.117891	0.172504	2	ensembl_havana	84432855	84476775	ENSMUSG00000027082	Tfpi	21788	protein_coding
ENSMUSG00000087362	1.72807	1.88859	1.63006	1.1586	0.24662		0.0280661	0.195526	2	havana	84500760	84531322	ENSMUSG00000087362	Gm13710	672763	lincRNA
ENSMUSG00000118521	9.96091	-0.33221	0.655748	-0.506612	0.612427	0.829262	-0.0267482	0.188494	2	havana	84576551	84592840	ENSMUSG00000118521	AL928616.1		processed_pseudogene
ENSMUSG00000034101	1190.63	-0.213965	0.188615	-1.1344	0.256626	0.547098	-0.118371	0.151704	2	ensembl_havana	84600071	84650765	ENSMUSG00000034101	Ctnnd1	12388	protein_coding
ENSMUSG00000086598	80.8754	0.623948	0.26272	2.37496	0.017551	0.106754	0.387493	0.294055	2	ensembl_havana	84659079	84668780	ENSMUSG00000086598	Btbd18	100270744	protein_coding
ENSMUSG00000076437	1706.44	-0.0504595	0.159235	-0.316888	0.751329	0.902954	-0.0303213	0.123968	2	ensembl_havana	84669215	84670770	ENSMUSG00000076437	Selenoh	72657	protein_coding
ENSMUSG00000050043	1822.73	0.258504	0.0859651	3.00708	0.00263767	0.026168	0.232013	0.0851621	2	ensembl_havana	84671316	84679140	ENSMUSG00000050043	Tmx2	66958	protein_coding
ENSMUSG00000027080	2466.12	-0.0661258	0.0894352	-0.739371	0.459681	0.731951	-0.0549388	0.0820318	2	ensembl_havana	84678402	84688215	ENSMUSG00000027080	Med19	381379	protein_coding
ENSMUSG00000034075	2892.79	0.0727322	0.0902927	0.805516	0.420522	0.700255	0.0602829	0.0828506	2	ensembl_havana	84687970	84715180	ENSMUSG00000034075	Zdhhc5	228136	protein_coding
ENSMUSG00000077382	1.77653	0.481828	1.39572	0.345219	0.72993		0.00922228	0.192422	2	ensembl	84700748	84700860	ENSMUSG00000077382	n-R5s200		rRNA
ENSMUSG00000027079	1849.11	-0.152555	0.0956806	-1.59442	0.110843	0.345728	-0.12699	0.0900291	2	ensembl_havana	84722104	84727350	ENSMUSG00000027079	Clp1	98985	protein_coding
ENSMUSG00000097187	23.9317	0.262192	0.48659	0.538835	0.59	0.817074	0.0367355	0.184362	2	havana	84742169	84743655	ENSMUSG00000097187	Gm19426		protein_coding
ENSMUSG00000023224	191.349	0.415906	0.190525	2.18295	0.0290395	0.149308	0.284019	0.192046	2	ensembl_havana	84765387	84775444	ENSMUSG00000023224	Serping1	12258	protein_coding
ENSMUSG00000027078	85.1996	1.60837	0.448948	3.58253	0.000340283	0.00547302	1.31728	0.50456	2	ensembl_havana	84798828	84810335	ENSMUSG00000027078	Ube2l6	56791	protein_coding
ENSMUSG00000027077	147.094	1.15589	0.314846	3.67127	0.000241346	0.00416789	0.967453	0.345171	2	ensembl_havana	84811176	84822652	ENSMUSG00000027077	Smtnl1	68678	protein_coding
ENSMUSG00000027076	855.975	-0.053329	0.107784	-0.494778	0.620757	0.833773	-0.0406913	0.0949347	2	ensembl_havana	84826997	84830213	ENSMUSG00000027076	Timm10	30059	protein_coding
ENSMUSG00000027075	498.255	0.0567885	0.262124	0.216647	0.828483	0.934861	0.0207168	0.15676	2	ensembl_havana	84838850	84863594	ENSMUSG00000027075	Slc43a1	72401	protein_coding
ENSMUSG00000050896	8.42365	0.368223	0.822537	0.447668	0.654393	0.852376	0.0196266	0.190172	2	ensembl_havana	84871924	84886710	ENSMUSG00000050896	Rtn4rl2	269295	protein_coding
ENSMUSG00000027074	261.866	0.332992	0.328124	1.01484	0.310184	0.601365	0.0932172	0.188525	2	ensembl_havana	84936579	84958509	ENSMUSG00000027074	Slc43a3	58207	protein_coding
ENSMUSG00000027071	110.196	1.29177	0.538484	2.39889	0.0164447	0.101863	0.2215	0.393082	2	ensembl_havana	84998583	85037462	ENSMUSG00000027071	P2rx3	228139	protein_coding
ENSMUSG00000027067	17830.5	0.0370388	0.0770577	0.480663	0.630756	0.839001	0.0281008	0.0716654	2	ensembl_havana	85037234	85047109	ENSMUSG00000027067	Ssrp1	20833	protein_coding
ENSMUSG00000033955	1347.23	0.0216929	0.140958	0.153896	0.877692	0.954507	0.0143614	0.11418	2	ensembl_havana	85048022	85073048	ENSMUSG00000033955	Tnks1bp1	228140	protein_coding
ENSMUSG00000075224	12.5343	0.873466	0.645435	1.3533	0.17596	0.446029	0.0778069	0.207089	2	ensembl_havana	85162334	85197197	ENSMUSG00000075224	Lrrc55	241528	protein_coding
ENSMUSG00000082028	9.12787	-1.0939	0.727286	-1.50409	0.132559	0.37988	-0.0778335	0.209518	2	havana	87393483	87394644	ENSMUSG00000082028	Gm1826		processed_pseudogene
ENSMUSG00000025839	375.542	1.94406	0.32706	5.94405	2.78067e-09	2.79417e-07	1.83058	0.337491	2	ensembl_havana	87489087	87497093	ENSMUSG00000025839	Pramel7	347712	protein_coding
ENSMUSG00000025838	486.754	2.35153	0.347464	6.76769	1.30859e-11	2.24854e-09	2.24668	0.355845	2	ensembl_havana	87506565	87510872	ENSMUSG00000025838	Pramel6	347711	protein_coding
ENSMUSG00000082908	17.5294	0.281178	0.466933	0.60218	0.547054	0.791116	0.0424746	0.184601	2	havana	87526145	87526397	ENSMUSG00000082908	Gm13736		processed_pseudogene
ENSMUSG00000061520	14.6908	1.02129	0.677924	1.5065	0.131939	0.378817	0.0832126	0.211574	2	ensembl_havana	87531796	87533053	ENSMUSG00000061520	Olfr153	110511	protein_coding
ENSMUSG00000082417	3.91344	-0.907241	1.48353	-0.61154	0.540842		-0.0151043	0.19326	2	havana	87546893	87547202	ENSMUSG00000082417	Gm13740		processed_pseudogene
ENSMUSG00000091703	1.66246	2.90159	1.78471	1.62581	0.103991		0.0345494	0.197426	2	havana	90148419	90148888	ENSMUSG00000091703	Gm4222		processed_pseudogene
ENSMUSG00000025314	668.196	0.474415	0.175777	2.69896	0.00695564	0.0545748	0.366672	0.183644	2	ensembl_havana	90429754	90580647	ENSMUSG00000025314	Ptprj	19271	protein_coding
ENSMUSG00000051329	9626.89	0.297385	0.0949527	3.13193	0.00173661	0.0190307	0.26335	0.0947311	2	ensembl_havana	90677215	90736328	ENSMUSG00000051329	Nup160	59015	protein_coding
ENSMUSG00000008200	5409.55	-0.166238	0.0772558	-2.15179	0.0314139	0.156357	-0.147809	0.0747667	2	ensembl_havana	90745370	90781021	ENSMUSG00000008200	Fnbp4	55935	protein_coding
ENSMUSG00000080873	4.11349	-0.712145	1.0749	-0.662523	0.507636		-0.0225939	0.192798	2	havana	90747616	90747963	ENSMUSG00000080873	Rpl30-ps3		processed_pseudogene
ENSMUSG00000040812	12.8823	-0.190224	0.592221	-0.321204	0.748056	0.901581	-0.0183277	0.185476	2	ensembl_havana	90782727	90834437	ENSMUSG00000040812	Agbl2	271813	protein_coding
ENSMUSG00000080977	4.72069	0.182311	0.902118	0.202092	0.839845		0.00816945	0.18986	2	havana	90804260	90804576	ENSMUSG00000080977	Gm13772		processed_pseudogene
ENSMUSG00000027282	6847.13	-0.0034309	0.0713262	-0.0481015	0.961635	0.985847	-0.00372671	0.0669453	2	ensembl_havana	90847155	90866810	ENSMUSG00000027282	Mtch2	56428	protein_coding
ENSMUSG00000040794	17.1737	0.283559	0.529979	0.535039	0.592623	0.818397	0.0341152	0.185894	2	ensembl_havana	90885860	90890525	ENSMUSG00000040794	C1qtnf4	67445	protein_coding
ENSMUSG00000005510	1803.44	-0.106749	0.0885821	-1.20509	0.22817	0.514184	-0.0898295	0.0825309	2	ensembl_havana	90894634	90904827	ENSMUSG00000005510	Ndufs3	68349	protein_coding
ENSMUSG00000005505	656.36	-0.276377	0.131609	-2.09999	0.03573	0.168714	-0.214872	0.127365	2	ensembl_havana	90904740	90911626	ENSMUSG00000005505	Kbtbd4	67136	protein_coding
ENSMUSG00000063235	371.517	0.204596	0.136811	1.49546	0.134794	0.383472	0.147567	0.124223	2	ensembl_havana	90908716	90918258	ENSMUSG00000063235	Ptpmt1	66461	protein_coding
ENSMUSG00000005506	13605.6	-0.052902	0.0951972	-0.55571	0.578409	0.810934	-0.0427356	0.086045	2	ensembl_havana	90940382	91019497	ENSMUSG00000005506	Celf1	13046	protein_coding
ENSMUSG00000082108	26.9309	1.16775	0.484536	2.41003	0.0159511	0.0997488	0.324238	0.651739	2	havana	91030778	91031122	ENSMUSG00000082108	Gm13777		processed_pseudogene
ENSMUSG00000002104	23.2228	0.120839	0.444589	0.271798	0.785777	0.917009	0.0195217	0.178938	2	ensembl_havana	91035620	91045729	ENSMUSG00000002104	Rapsn	19400	protein_coding
ENSMUSG00000086495	4.46251	-0.20561	0.935016	-0.2199	0.825949		-0.00840922	0.190181	2	havana	91044092	91053933	ENSMUSG00000086495	Gm13778		processed_transcript
ENSMUSG00000002102	5782.89	-0.0502686	0.0789034	-0.63709	0.524066	0.778577	-0.0432064	0.0734614	2	ensembl_havana	91054009	91066369	ENSMUSG00000002102	Psmc3	19182	protein_coding
ENSMUSG00000002105	216.946	-0.0467847	0.171997	-0.272009	0.785615	0.917009	-0.0261199	0.129476	2	ensembl_havana	91061791	91070417	ENSMUSG00000002105	Slc39a13	68427	protein_coding
ENSMUSG00000002111	13.6122	0.974938	0.580126	1.68056	0.0928477	0.311602	0.113891	0.22952	2	ensembl_havana	91082390	91115756	ENSMUSG00000002111	Spi1	20375	protein_coding
ENSMUSG00000002100	52.8658	0.301992	0.484021	0.623924	0.532678	0.78311	0.042877	0.185815	2	ensembl_havana	91118144	91136516	ENSMUSG00000002100	Mybpc3	17868	protein_coding
[truncated: 19,844 more rows]

## Sheet: EBs_48h_DEA_KOvsWT
	baseMean	log2FoldChange	lfcSE	stat	pvalue	padj	Shrunken_lFC	Shrunken_lFCSE	chrom	source	start	end	gene_id	gene_name	Entrez	gene_biotype
ENSMUSG00000051951	24.4187	-3.37978	0.807262	-4.18672	2.83019e-05	0.000381065	-2.94855	0.865564	1	ensembl_havana	3205901	3671498	ENSMUSG00000051951	Xkr4	497097	protein_coding
ENSMUSG00000025902	12.041	1.0726	0.909728	1.17903	0.238384	0.448888	0.13326	0.34753	1	ensembl_havana	4490931	4497354	ENSMUSG00000025902	Sox17	20671	protein_coding
ENSMUSG00000103922	241.744	0.307009	0.188495	1.62874	0.103368	0.258614	0.24541	0.176194	1	havana	4771131	4772199	ENSMUSG00000103922	Gm6123	620009	processed_pseudogene
ENSMUSG00000033845	4544.86	0.105649	0.123417	0.856035	0.391978	0.612437	0.0935879	0.116477	1	ensembl_havana	4773206	4785739	ENSMUSG00000033845	Mrpl15	27395	protein_coding
ENSMUSG00000102275	33.8704	0.60721	0.365398	1.66178	0.0965575	0.246134	0.338769	0.326426	1	havana	4778063	4779212	ENSMUSG00000102275	Gm37144		TEC
ENSMUSG00000025903	2513.63	0.330919	0.150598	2.19737	0.0279938	0.100312	0.28813	0.145749	1	ensembl_havana	4807788	4848410	ENSMUSG00000025903	Lypla1	18777	protein_coding
ENSMUSG00000033813	5571.11	0.114031	0.11534	0.988652	0.322834	0.543796	0.102342	0.109744	1	ensembl_havana	4857814	4897909	ENSMUSG00000033813	Tcea1	21399	protein_coding
ENSMUSG00000062588	9.29364	-0.12771	0.70492	-0.18117	0.856234	0.934549	-0.0229492	0.301336	1	havana	4880049	4880651	ENSMUSG00000062588	Gm6104		processed_pseudogene
ENSMUSG00000002459	44.8595	-0.602572	0.359379	-1.6767	0.0936004	0.240664	-0.340465	0.323077	1	ensembl_havana	4909576	5070285	ENSMUSG00000002459	Rgs20	58175	protein_coding
ENSMUSG00000085623	4.38315	-0.257399	1.04481	-0.24636	0.805404		-0.0233852	0.317655	1	havana	4970857	4976820	ENSMUSG00000085623	Gm16041	102631647	antisense
ENSMUSG00000033793	2334.94	0.153545	0.0907735	1.69152	0.0907377	0.235546	0.143823	0.0883062	1	ensembl_havana	5070018	5162529	ENSMUSG00000033793	Atp6v1h	108664	protein_coding
ENSMUSG00000025905	15.2315	-1.58021	0.633239	-2.49544	0.0125803	0.0550684	-0.863102	0.857168	1	ensembl_havana	5588466	5606131	ENSMUSG00000025905	Oprk1	18387	protein_coding
ENSMUSG00000025907	1732.99	0.135044	0.103961	1.29899	0.193947	0.392186	0.123901	0.100052	1	ensembl_havana	6206197	6276648	ENSMUSG00000025907	Rb1cc1	12421	protein_coding
ENSMUSG00000090031	12.5749	-0.0843051	0.550169	-0.153235	0.878213	0.945005	-0.0222434	0.28502	1	ensembl_havana	6209866	6215293	ENSMUSG00000090031	4732440D04Rik		antisense
ENSMUSG00000103845	2.09878	0.254769	1.45254	0.175395	0.860769		0.012867	0.324076	1	havana	6429655	6441296	ENSMUSG00000103845	Gm19026	100418138	processed_pseudogene
ENSMUSG00000102135	13.7066	-0.169638	0.677739	-0.2503	0.802355	0.907067	-0.0325949	0.300033	1	havana	6916559	6923588	ENSMUSG00000102135	Gm37108		processed_pseudogene
ENSMUSG00000051285	2334.91	-0.22975	0.150219	-1.52943	0.126158	0.295926	-0.195404	0.141764	1	ensembl_havana	7088920	7173628	ENSMUSG00000051285	Pcmtd1	319263	protein_coding
ENSMUSG00000103509	163.398	-0.20285	0.201844	-1.00498	0.314905	0.535222	-0.151779	0.179034	1	havana	7148110	7152137	ENSMUSG00000103509	Gm38372		TEC
ENSMUSG00000048538	93.184	-0.257661	0.271918	-0.947567	0.34335	0.564908	-0.160682	0.223968	1	ensembl_havana	7177739	7179037	ENSMUSG00000048538	Gm9826		processed_pseudogene
ENSMUSG00000097797	63.0806	0.17244	0.330695	0.521447	0.602055	0.781792	0.0884444	0.240455	1	havana	7349406	7397869	ENSMUSG00000097797	Gm26901		lincRNA
ENSMUSG00000103067	8.86647	0.0807545	0.914472	0.0883073	0.929632	0.970443	0.00975908	0.312326	1	havana	7497968	7518149	ENSMUSG00000103067	Gm30414		lincRNA
ENSMUSG00000025909	2.03699	-0.547239	1.54878	-0.353336	0.723837		-0.0239086	0.326028	1	ensembl_havana	8361475	9299878	ENSMUSG00000025909	Sntg1	71096	protein_coding
ENSMUSG00000086235	2.64942	-1.13017	1.35564	-0.833682	0.40446		-0.0649015	0.331581	1	havana	8468426	8468825	ENSMUSG00000086235	Gm16284		processed_pseudogene
ENSMUSG00000084353	32.6334	0.147127	0.368596	0.399155	0.689779	0.838931	0.06701	0.250852	1	havana	8791923	8792162	ENSMUSG00000084353	Gm15452		processed_pseudogene
ENSMUSG00000103933	15.4038	0.380939	0.583196	0.653192	0.513633	0.713769	0.0965874	0.302528	1	havana	8815842	8816039	ENSMUSG00000103933	Gm36964		processed_pseudogene
ENSMUSG00000061024	2459.33	-0.168385	0.0799037	-2.10735	0.0350876	0.118711	-0.15988	0.0783104	1	ensembl_havana	9545408	9547455	ENSMUSG00000061024	Rrs1	59014	protein_coding
ENSMUSG00000025911	27.5891	-0.0581877	0.427722	-0.136041	0.891789	0.952533	-0.0215855	0.262812	1	ensembl_havana	9547948	9580673	ENSMUSG00000025911	Adhfe1	76187	protein_coding
ENSMUSG00000081441	2.78536	-0.868593	1.17378	-0.739995	0.459303		-0.0658183	0.328326	1	havana	9574548	9575649	ENSMUSG00000081441	Gm6161	620542	processed_pseudogene
ENSMUSG00000025912	473.596	0.387921	0.209093	1.85526	0.0635593	0.183361	0.303489	0.198046	1	ensembl_havana	9667415	9700209	ENSMUSG00000025912	Mybl1	17864	protein_coding
ENSMUSG00000045210	2034.46	-0.0339216	0.11329	-0.299423	0.764617	0.88582	-0.0302641	0.107296	1	ensembl_havana	9718622	9748382	ENSMUSG00000045210	Vcpip1	70675	protein_coding
ENSMUSG00000097893	9.29921	-0.635399	0.785794	-0.808608	0.41874	0.637035	-0.0994218	0.323837	1	havana	9747648	9791924	ENSMUSG00000097893	1700034P13Rik		antisense
ENSMUSG00000025915	422.981	0.31401	0.114978	2.73104	0.00631343	0.0324016	0.289029	0.112781	1	ensembl_havana	9798107	9900845	ENSMUSG00000025915	Sgk3	170755	protein_coding
ENSMUSG00000046334	1.95887	0.98897	1.60641	0.61564	0.538132		0.0409503	0.328937	1	havana	9802197	9802553	ENSMUSG00000046334	Gm6195	108167613	processed_pseudogene
ENSMUSG00000046101	13.3601	0.749546	0.656263	1.14214	0.253395	0.467371	0.168173	0.34283	1	ensembl_havana	9908638	9942085	ENSMUSG00000046101	Mcmdc2	240697	protein_coding
ENSMUSG00000098234	587.749	-0.0406886	0.114887	-0.354162	0.723217	0.861168	-0.0362467	0.108685	1	havana	9941959	9944118	ENSMUSG00000098234	Snhg6	73824	lincRNA
ENSMUSG00000093178	25.9556	-0.652257	0.433229	-1.50557	0.132177	0.304786	-0.29245	0.349253	1	ensembl	9942463	9942549	ENSMUSG00000093178	Snord87	266793	snoRNA
ENSMUSG00000099032	87.5385	0.166699	0.257413	0.647596	0.517247	0.716672	0.106267	0.20914	1	ensembl_havana	9960163	9967932	ENSMUSG00000099032	Tcf24	100039596	protein_coding
ENSMUSG00000025917	3347.6	-0.121433	0.0716853	-1.69398	0.0902697	0.234533	-0.116251	0.0703326	1	ensembl_havana	10024601	10038168	ENSMUSG00000025917	Cops5	26754	protein_coding
ENSMUSG00000056763	1144.35	-0.113818	0.14642	-0.777338	0.436959	0.652411	-0.0957242	0.135271	1	ensembl_havana	10037987	10136768	ENSMUSG00000056763	Cspp1	211660	protein_coding
ENSMUSG00000067851	2386.02	-0.304108	0.202103	-1.50472	0.132396	0.305008	-0.234359	0.186207	1	ensembl_havana	10137571	10232670	ENSMUSG00000067851	Arfgef1	211673	protein_coding
ENSMUSG00000048960	786.955	0.0768842	0.151688	0.506856	0.612256	0.789354	0.0640754	0.138633	1	ensembl_havana	10993465	11303681	ENSMUSG00000048960	Prex2	109294	protein_coding
ENSMUSG00000057715	150.089	0.674383	0.303733	2.22032	0.0263972	0.0961327	0.478529	0.305347	1	ensembl_havana	11414105	11975901	ENSMUSG00000057715	A830018L16Rik	320492	protein_coding
ENSMUSG00000016918	3477.85	-0.562079	0.216128	-2.60067	0.00930407	0.0437656	-0.461702	0.215828	1	ensembl_havana	12692277	12861192	ENSMUSG00000016918	Sulf1	240725	protein_coding
ENSMUSG00000025938	180.027	-0.511452	0.368947	-1.38625	0.165672	0.354027	-0.263075	0.302793	1	ensembl_havana	12866549	12992650	ENSMUSG00000025938	Slco5a1	240726	protein_coding
ENSMUSG00000069620	1.79169	3.19341	1.83004	1.74499	0.0809862		0.10628	0.352303	1	havana	13062025	13062345	ENSMUSG00000069620	Gm5250		processed_pseudogene
ENSMUSG00000099498	2.33865	1.84776	1.47346	1.25402	0.209833		0.0938689	0.342981	1	havana	13068838	13078662	ENSMUSG00000099498	Gm29283		lincRNA
ENSMUSG00000042414	152.963	1.65157	0.227093	7.27267	3.5246e-13	3.81923e-11	1.59246	0.23051	1	ensembl_havana	13113457	13127163	ENSMUSG00000042414	Prdm14	383491	protein_coding
ENSMUSG00000005886	1854.52	-0.191533	0.104736	-1.82873	0.0674403	0.190777	-0.175998	0.101458	1	ensembl_havana	13139105	13374083	ENSMUSG00000005886	Ncoa2	17978	protein_coding
ENSMUSG00000025935	3149.91	-0.0263349	0.118569	-0.222107	0.824231	0.918134	-0.0220626	0.111708	1	ensembl_havana	13564698	13589910	ENSMUSG00000025935	Tram1	72265	protein_coding
ENSMUSG00000025937	1443.96	0.178167	0.126207	1.41171	0.158036	0.34237	0.157552	0.120135	1	ensembl_havana	13623330	13660546	ENSMUSG00000025937	Lactb2	212442	protein_coding
ENSMUSG00000102982	11.89	0.237468	0.583705	0.406829	0.684133	0.835927	0.0591535	0.293825	1	havana	13641483	13642748	ENSMUSG00000102982	Gm38319		TEC
ENSMUSG00000067813	4.56964	3.6899	1.40772	2.62119	0.00876237		0.32039	0.59612	1	ensembl_havana	13668771	13701723	ENSMUSG00000067813	Xkr9	381246	protein_coding
ENSMUSG00000097711	2.43436	0.219077	1.36857	0.160077	0.87282		0.012397	0.32304	1	havana	13785883	13786879	ENSMUSG00000097711	Gm5523	433273	processed_pseudogene
ENSMUSG00000025932	24.9109	0.440228	0.421452	1.04455	0.296231	0.514536	0.18433	0.296231	1	ensembl_havana	14168954	14310235	ENSMUSG00000025932	Eya1	14048	protein_coding
ENSMUSG00000025930	65.0882	0.676931	0.548271	1.23467	0.216955	0.422244	0.205709	0.344617	1	ensembl_havana	14753346	14755992	ENSMUSG00000025930	Msc	17681	protein_coding
ENSMUSG00000081201	2.00116	-0.499834	1.36236	-0.366889	0.713702		-0.0280412	0.32432	1	ensembl_havana	14839869	14840156	ENSMUSG00000081201	Smt3h2-ps4		processed_pseudogene
ENSMUSG00000082193	30.1622	-0.146763	0.512107	-0.286587	0.774429	0.89067	-0.0433385	0.281138	1	ensembl_havana	14865072	14865965	ENSMUSG00000082193	Rpl5-ps1	665407	processed_pseudogene
ENSMUSG00000032769	63.1473	-0.820567	0.339693	-2.41561	0.0157087	0.0650639	-0.579436	0.3555	1	ensembl_havana	14872648	14918862	ENSMUSG00000032769	Trpa1	277328	protein_coding
ENSMUSG00000073737	22.7739	-0.735785	0.436246	-1.68663	0.091675	0.23737	-0.348313	0.378857	1	havana	15268802	15269797	ENSMUSG00000073737	Gm10566	100039959	processed_pseudogene
ENSMUSG00000025925	3509.03	-0.230572	0.139713	-1.65032	0.0988772	0.250179	-0.20032	0.132995	1	ensembl_havana	15805646	15844052	ENSMUSG00000025925	Terf1	21749	protein_coding
ENSMUSG00000104379	16.7509	0.708399	0.552398	1.28241	0.199701	0.399976	0.21609	0.350725	1	havana	15853331	15856499	ENSMUSG00000104379	Gm37509		TEC
ENSMUSG00000067795	2.05666	-1.09775	1.85248	-0.592583	0.55346		-0.0337048	0.329651	1	ensembl_havana	16065979	16093325	ENSMUSG00000067795	4930444P10Rik	75799	protein_coding
ENSMUSG00000043716	46562.5	-0.147699	0.0626055	-2.3592	0.0183146	0.0728719	-0.142984	0.0617763	1	ensembl_havana	16101295	16104662	ENSMUSG00000043716	Rpl7	19989	protein_coding
ENSMUSG00000025921	264.989	0.0802515	0.17202	0.466525	0.64084	0.809651	0.0634488	0.153603	1	ensembl_havana	16105774	16133734	ENSMUSG00000025921	Rdh10	98711	protein_coding
ENSMUSG00000025920	321.822	-0.634186	0.23181	-2.7358	0.00622296	0.032028	-0.519851	0.234562	1	ensembl_havana	16228674	16520112	ENSMUSG00000025920	Stau2	29819	protein_coding
ENSMUSG00000025939	580.678	-0.171853	0.124713	-1.37799	0.168207	0.357515	-0.152308	0.118718	1	ensembl_havana	16540790	16619489	ENSMUSG00000025939	Ube2w	66799	protein_coding
ENSMUSG00000079658	2729.61	-0.0379383	0.0903352	-0.419973	0.674506	0.832055	-0.0352716	0.0872173	1	ensembl_havana	16641725	16657042	ENSMUSG00000079658	Eloc	67923	protein_coding
ENSMUSG00000025940	378.234	0.113418	0.178078	0.636899	0.524191	0.722779	0.0889878	0.158742	1	ensembl_havana	16665207	16678275	ENSMUSG00000025940	Tmem70	70397	protein_coding
ENSMUSG00000025779	7.74292	-0.311393	0.700714	-0.444393	0.656758	0.82054	-0.0576872	0.305638	1	ensembl_havana	16688051	16709611	ENSMUSG00000025779	Ly96	17087	protein_coding
ENSMUSG00000091020	31.6796	0.129311	0.390085	0.331494	0.740272	0.871542	0.0550321	0.25596	1	havana	16768279	16770138	ENSMUSG00000091020	Gm5828	545306	processed_pseudogene
ENSMUSG00000042686	425.306	-1.31927	0.208938	-6.31419	2.71588e-10	1.53105e-08	-1.25757	0.212903	1	ensembl_havana	16964560	17097889	ENSMUSG00000042686	Jph1	57339	protein_coding
ENSMUSG00000025777	3.63036	0.267454	1.16163	0.23024	0.817905		0.0204743	0.320176	1	ensembl_havana	17145362	17164271	ENSMUSG00000025777	Gdap1	14545	protein_coding
ENSMUSG00000100398	22.0895	1.35788	0.55731	2.43648	0.0148308	0.0624571	0.774674	0.693433	1	havana	17394958	17395429	ENSMUSG00000100398	Gm5251		processed_pseudogene
ENSMUSG00000101589	2.80431	-0.186122	1.14205	-0.162972	0.87054		-0.0143877	0.319315	1	havana	17397412	17400281	ENSMUSG00000101589	Rbm6-ps1	108212	processed_pseudogene
ENSMUSG00000025776	66.6394	-1.29737	0.294772	-4.40126	1.07624e-05	0.000167316	-1.16905	0.306775	1	ensembl_havana	17727045	17766344	ENSMUSG00000025776	Crispld1	83691	protein_coding
ENSMUSG00000109887	4.36657	-2.10072	1.14879	-1.82863	0.0674545		-0.187005	0.394841	1	havana	17994462	18059056	ENSMUSG00000109887	Gm28756		processed_transcript
ENSMUSG00000100720	11.2378	-0.519675	0.654556	-0.793935	0.427233	0.64379	-0.110757	0.316052	1	havana	19153422	19153966	ENSMUSG00000100720	Gm10075		processed_pseudogene
ENSMUSG00000100204	2.8	0.150216	1.23518	0.121614	0.903205		0.0103152	0.320937	1	havana	19330939	19333184	ENSMUSG00000100204	Gm4849	226901	processed_pseudogene
ENSMUSG00000043760	80.2663	1.07389	0.345459	3.10859	0.00187984	0.0124516	0.861413	0.371257	1	ensembl_havana	20057779	20618064	ENSMUSG00000043760	Pkhd1	241035	protein_coding
ENSMUSG00000041872	3.64201	-1.09741	1.159	-0.946854	0.343713		-0.0855149	0.334407	1	ensembl_havana	20777146	20790617	ENSMUSG00000041872	Il17f	257630	protein_coding
ENSMUSG00000041859	17430.4	-0.00648333	0.0629139	-0.103051	0.917923	0.964786	-0.00617943	0.0618145	1	ensembl_havana	20802968	20820312	ENSMUSG00000041859	Mcm3	17215	protein_coding
ENSMUSG00000025931	154.34	-0.129917	0.424987	-0.305697	0.759836	0.882824	-0.0490776	0.264375	1	ensembl_havana	20890606	20939650	ENSMUSG00000025931	Paqr8	74229	protein_coding
ENSMUSG00000041809	27.0084	-0.791594	0.414344	-1.91048	0.0560718	0.167604	-0.427285	0.398491	1	ensembl_havana	20951626	20990841	ENSMUSG00000041809	Efhc1	71877	protein_coding
ENSMUSG00000041779	440.129	0.241476	0.271035	0.890942	0.372961	0.594959	0.151068	0.222065	1	ensembl_havana	20996299	21079229	ENSMUSG00000041779	Tram2	170829	protein_coding
ENSMUSG00000100819	1.68569	-0.0226909	1.61112	-0.0140839	0.988763		-0.000837746	0.325313	1	havana	21178988	21187427	ENSMUSG00000100819	Gm2693		unprocessed_pseudogene
ENSMUSG00000025933	81.9226	0.949051	0.26046	3.64375	0.000268693	0.00257399	0.825411	0.270986	1	ensembl_havana	21218575	21230167	ENSMUSG00000025933	Tmem14a	75712	protein_coding
ENSMUSG00000025934	263.369	2.16403	0.328498	6.58765	4.46845e-11	3.06292e-09	2.06615	0.335774	1	ensembl_havana	21240589	21265661	ENSMUSG00000025934	Gsta3	14859	protein_coding
ENSMUSG00000099343	8.76464	2.36763	1.0763	2.19978	0.0278226	0.099851	0.245572	0.458155	1	havana	21250359	21271593	ENSMUSG00000099343	Gm28836		antisense
ENSMUSG00000028033	16.3574	-1.58493	0.705031	-2.24803	0.0245744	0.0908476	-0.517347	0.810407	1	ensembl_havana	21398403	21961942	ENSMUSG00000028033	Kcnq5	226922	protein_coding
ENSMUSG00000082935	75.0356	-0.0960871	0.257249	-0.373518	0.708763	0.851104	-0.0601524	0.205247	1	havana	21511933	21513056	ENSMUSG00000082935	Gm7658	665489	processed_pseudogene
ENSMUSG00000041670	128.191	-0.0576731	0.353643	-0.163083	0.870453	0.941694	-0.0266808	0.242725	1	ensembl_havana	22286251	22805994	ENSMUSG00000041670	Rims1	116837	protein_coding
ENSMUSG00000097970	5.64633	0.673201	0.88568	0.760095	0.447198	0.660665	0.0857092	0.324833	1	havana	23291537	23291935	ENSMUSG00000097970	Gm27028		lincRNA
ENSMUSG00000026158	374.311	-0.349664	0.163694	-2.13609	0.0326721	0.112381	-0.297816	0.157978	1	ensembl_havana	23366424	23397772	ENSMUSG00000026158	Ogfrl1	70155	protein_coding
ENSMUSG00000026156	2.01272	-0.509848	1.32887	-0.38367	0.701223		-0.0299793	0.324086	1	ensembl_havana	23761753	23849158	ENSMUSG00000026156	B3gat2	280645	protein_coding
ENSMUSG00000026155	1909.51	0.194038	0.102679	1.88976	0.0587906	0.173213	0.179214	0.0996276	1	ensembl_havana	23844846	23922317	ENSMUSG00000026155	Smap1	98366	protein_coding
ENSMUSG00000026154	166.525	0.170797	0.20028	0.852794	0.393774	0.614287	0.127194	0.17615	1	ensembl_havana	23995939	24005656	ENSMUSG00000026154	Sdhaf4	68002	protein_coding
ENSMUSG00000026153	1100.52	-0.574885	0.124765	-4.60775	4.0704e-06	7.32915e-05	-0.541872	0.125314	1	ensembl_havana	24011093	24100341	ENSMUSG00000026153	Fam135a	68187	protein_coding
ENSMUSG00000026147	6.06912	-0.249663	0.948983	-0.263085	0.792485	0.900861	-0.0271022	0.314871	1	ensembl_havana	24177610	24252684	ENSMUSG00000026147	Col9a1	12839	protein_coding
ENSMUSG00000099997	7.96874	-0.396399	0.833077	-0.475825	0.634199	0.804632	-0.0548186	0.313989	1	havana	24594087	24595423	ENSMUSG00000099997	Tubb4b-ps2	665829	processed_pseudogene
ENSMUSG00000100131	409.255	0.102406	0.170886	0.599264	0.548997	0.742564	0.0816272	0.153327	1	havana	24611535	24612410	ENSMUSG00000100131	Gm28439		unprocessed_pseudogene
ENSMUSG00000067736	203.642	0.10898	0.171915	0.633916	0.526136	0.724412	0.0867618	0.154224	1	ensembl_havana	24612407	24612700	ENSMUSG00000067736	Gm10222	100142658	unprocessed_pseudogene
ENSMUSG00000101939	199.379	0.112405	0.169456	0.663329	0.50712	0.708035	0.0901003	0.152556	1	havana	24612775	24613119	ENSMUSG00000101939	Gm28438		unprocessed_pseudogene
ENSMUSG00000101111	1615.02	0.0215406	0.0989731	0.217641	0.827709	0.919812	0.0199118	0.0948636	1	havana	24613189	24613971	ENSMUSG00000101111	Gm28437		unprocessed_pseudogene
ENSMUSG00000100862	1992.5	-0.0966587	0.102754	-0.940678	0.34687	0.568617	-0.0883511	0.0985904	1	havana	24613974	24614651	ENSMUSG00000100862	Gm10925	100503946	unprocessed_pseudogene
ENSMUSG00000102070	1349.38	0.0414459	0.105526	0.392757	0.694499	0.841786	0.037805	0.10065	1	havana	24614885	24615565	ENSMUSG00000102070	Gm28661		unprocessed_pseudogene
ENSMUSG00000101249	1149.66	0.206052	0.117184	1.75836	0.0786863	0.212553	0.186164	0.112847	1	havana	24615706	24616197	ENSMUSG00000101249	Gm29216		unprocessed_pseudogene
ENSMUSG00000073725	369.304	-0.198812	0.14662	-1.35597	0.175108	0.367471	-0.169317	0.137756	1	ensembl_havana	24678630	24766301	ENSMUSG00000073725	Lmbrd1	68421	protein_coding
ENSMUSG00000033569	9.57125	-0.63049	0.784665	-0.803514	0.421678	0.639275	-0.0989604	0.323565	1	ensembl_havana	25067476	25829707	ENSMUSG00000033569	Adgrb3	210933	protein_coding
ENSMUSG00000086240	128	-0.231608	0.200122	-1.15733	0.247137	0.45963	-0.175393	0.179696	1	havana	28580499	28580772	ENSMUSG00000086240	Gm7846		processed_pseudogene
ENSMUSG00000099492	20.7243	0.143522	0.449646	0.319188	0.749584	0.877289	0.0514088	0.270254	1	havana	29484604	29485915	ENSMUSG00000099492	Gm5525	433283	processed_pseudogene
ENSMUSG00000048874	6458.74	0.169218	0.0813392	2.0804	0.0374889	0.124476	0.160601	0.0796636	1	ensembl_havana	30802339	30873921	ENSMUSG00000048874	Phf3	213109	protein_coding
ENSMUSG00000104315	6.31549	0.920105	0.798246	1.15266	0.249051	0.462285	0.147859	0.346439	1	havana	30865504	30868538	ENSMUSG00000104315	Gm37906		TEC
ENSMUSG00000026064	30.2059	-0.824422	0.418321	-1.97079	0.0487478	0.15144	-0.451467	0.411848	1	havana	30940302	30949309	ENSMUSG00000026064	Ptp4a1	19243	protein_coding
ENSMUSG00000117091	71.7234	0.640461	0.44744	1.43139	0.152319	0.333983	0.271492	0.346326	1	ensembl_havana	30977243	30977968	ENSMUSG00000117091	Gm5698	435615	protein_coding
ENSMUSG00000086726	5.39835	0.633735	0.994315	0.637358	0.523891	0.722477	0.0650326	0.323332	1	havana	30986225	30986953	ENSMUSG00000086726	Gm9458	669402	processed_pseudogene
ENSMUSG00000086727	51.1971	0.627448	0.459935	1.36421	0.172501	0.363736	0.252545	0.341665	1	ensembl_havana	30997842	31222684	ENSMUSG00000086727	4931428L18Rik		protein_coding
ENSMUSG00000094215	36.1374	0.65502	0.521847	1.25519	0.209408	0.412301	0.215706	0.342751	1	havana	31286945	31287640	ENSMUSG00000094215	Gm6489		processed_pseudogene
ENSMUSG00000070960	5.15712	-0.881011	0.879495	-1.00172	0.316477	0.536749	-0.115927	0.336019	1	havana	31615149	31616661	ENSMUSG00000070960	Gm19680	100503415	processed_pseudogene
ENSMUSG00000026058	9.72822	-1.68137	0.715645	-2.34945	0.018801	0.0743168	-0.66525	1.01753	1	ensembl_havana	32172714	32658568	ENSMUSG00000026058	Khdrbs2	170771	protein_coding
ENSMUSG00000026134	1767.31	-0.101316	0.0873416	-1.15999	0.246051	0.458174	-0.0949269	0.084783	1	ensembl_havana	33453810	33669795	ENSMUSG00000026134	Prim2	19076	protein_coding
ENSMUSG00000103746	2.95413	-0.328254	1.12864	-0.29084	0.771174		-0.0261387	0.319956	1	ensembl_havana	33669824	33670712	ENSMUSG00000103746	1700001G17Rik	67503	TEC
ENSMUSG00000004768	1578.79	0.0498829	0.0866119	0.575936	0.564659	0.754212	0.0468379	0.0838862	1	ensembl_havana	33719887	33742564	ENSMUSG00000004768	Rab23	19335	protein_coding
ENSMUSG00000042215	207.448	-0.979349	0.292651	-3.34648	0.000818454	0.00637295	-0.82134	0.308292	1	ensembl_havana	33745484	33757795	ENSMUSG00000042215	Bag2	213539	protein_coding
ENSMUSG00000042197	2978.28	0.065909	0.0812126	0.811561	0.417043	0.635806	0.0622968	0.0789998	1	ensembl_havana	33761545	33814595	ENSMUSG00000042197	Zfp451	98403	protein_coding
ENSMUSG00000081402	41.1431	1.30199	0.527955	2.4661	0.0136594	0.0586682	0.775706	0.645016	1	havana	33836124	33838680	ENSMUSG00000081402	Gm15455	433287	processed_pseudogene
ENSMUSG00000042182	40.2986	-0.240663	0.37561	-0.640727	0.5217	0.720773	-0.108285	0.259766	1	ensembl_havana	33852052	33907816	ENSMUSG00000042182	Bend6	320705	protein_coding
ENSMUSG00000026131	9017.53	-0.00546465	0.120695	-0.0452764	0.963887	0.985452	-0.00448499	0.113438	1	ensembl_havana	33908225	34308661	ENSMUSG00000026131	Dst	13518	protein_coding
ENSMUSG00000103364	3.8384	0.885829	1.01828	0.869927	0.38434		0.0882882	0.331094	1	havana	34032100	34033797	ENSMUSG00000103364	Gm38157		TEC
ENSMUSG00000096992	27.696	-0.0499528	0.514408	-0.0971074	0.922641	0.96733	-0.0135294	0.279304	1	havana	34165856	34178446	ENSMUSG00000096992	Gm26788	108167617	processed_transcript
ENSMUSG00000102336	5.11906	0.457072	0.88556	0.516139	0.605757	0.785063	0.0574393	0.317114	1	havana	34427002	34433264	ENSMUSG00000102336	Gm37233		lincRNA
ENSMUSG00000042111	783.621	-0.0867184	0.121071	-0.716259	0.473832	0.683319	-0.0766309	0.114251	1	ensembl_havana	34436670	34439672	ENSMUSG00000042111	Ccdc115	69668	protein_coding
ENSMUSG00000026127	4097.8	0.116953	0.0906716	1.28985	0.197102	0.396836	0.109307	0.0879202	1	ensembl_havana	34439851	34449356	ENSMUSG00000026127	Imp4	27993	protein_coding
ENSMUSG00000026126	59.8566	-0.517419	0.346861	-1.49172	0.135773	0.309645	-0.288198	0.297781	1	ensembl_havana	34459762	34475733	ENSMUSG00000026126	Ptpn18	19253	protein_coding
ENSMUSG00000100280	9.81226	-1.43884	0.656559	-2.19149	0.0284164	0.101405	-0.54192	0.742975	1	havana	34468834	34473148	ENSMUSG00000100280	Gm28417		processed_transcript
ENSMUSG00000026124	12.999	-0.195427	0.609962	-0.320393	0.748671	0.876932	-0.0447246	0.294713	1	ensembl_havana	34535648	34544313	ENSMUSG00000026124	Cfc1	12627	protein_coding
ENSMUSG00000045174	2.24607	1.39088	2.13864	0.650356	0.515463		0.0321186	0.330869	1	ensembl_havana	34579657	34590944	ENSMUSG00000045174	Amer3	211383	protein_coding
ENSMUSG00000037509	169.337	-0.304178	0.396092	-0.767949	0.442518	0.656989	-0.13049	0.271456	1	ensembl_havana	34678188	34813309	ENSMUSG00000037509	Arhgef4	226970	protein_coding
ENSMUSG00000104002	22.8561	0.204074	0.455763	0.447765	0.654323	0.818979	0.0722432	0.274607	1	havana	34809360	34811908	ENSMUSG00000104002	Gm38336		antisense
ENSMUSG00000037503	4498.21	-0.248519	0.0974782	-2.54948	0.0107884	0.0489657	-0.23232	0.0954938	1	ensembl_havana	34813219	34843065	ENSMUSG00000037503	Fam168b	214469	protein_coding
ENSMUSG00000026123	554.579	0.783181	0.157173	4.98293	6.26296e-07	1.44744e-05	0.735779	0.159337	1	ensembl_havana	34849976	34879580	ENSMUSG00000026123	Plekhb2	226971	protein_coding
ENSMUSG00000102279	2.1025	3.44429	2.21414	1.55558	0.119807		0.0686163	0.340346	1	havana	35981960	35986373	ENSMUSG00000102279	Gm37146		lincRNA
ENSMUSG00000103708	19.2529	0.959602	0.534412	1.79562	0.0725543	0.20046	0.369856	0.456948	1	havana	36002985	36011044	ENSMUSG00000103708	Gm33222		lincRNA
ENSMUSG00000104201	1.76498	1.47736	2.22819	0.663034	0.507309		0.0315387	0.331053	1	havana	36011072	36011894	ENSMUSG00000104201	4930535G08Rik		lincRNA
ENSMUSG00000045216	2285.35	0.299366	0.131423	2.27788	0.0227337	0.0855634	0.26792	0.127638	1	ensembl_havana	36068400	36106446	ENSMUSG00000045216	Hs6st1	50785	protein_coding
ENSMUSG00000037470	4698.92	0.215836	0.0734053	2.94033	0.00327861	0.0194269	0.207333	0.0724113	1	ensembl_havana	36140027	36244720	ENSMUSG00000037470	Uggt1	320011	protein_coding
ENSMUSG00000047180	7.62124	-1.36229	0.846128	-1.61003	0.107391	0.264869	-0.213023	0.397925	1	ensembl_havana	36264597	36274679	ENSMUSG00000047180	Neurl3	214854	protein_coding
ENSMUSG00000037447	107.513	0.724335	0.222326	3.25799	0.00112204	0.00822708	0.623645	0.22734	1	ensembl_havana	36307733	36324029	ENSMUSG00000037447	Arid5a	214855	protein_coding
ENSMUSG00000010453	2303.04	0.0366956	0.0786721	0.466437	0.640903	0.809657	0.0348423	0.0765849	1	ensembl_havana	36335730	36369181	ENSMUSG00000010453	Kansl3	226976	protein_coding
ENSMUSG00000001143	575.309	0.0230905	0.132367	0.174443	0.861517	0.937745	0.0200543	0.123012	1	ensembl_havana	36419871	36445271	ENSMUSG00000001143	Lman2l	214895	protein_coding
ENSMUSG00000037408	485.206	-0.538178	0.187031	-2.87747	0.00400874	0.0227465	-0.463197	0.186888	1	ensembl_havana	36471620	36508764	ENSMUSG00000037408	Cnnm4	94220	protein_coding
ENSMUSG00000104316	2.46205	1.4545	1.35569	1.07288	0.283323		0.0861032	0.338212	1	havana	36473952	36476110	ENSMUSG00000104316	Gm37909		TEC
ENSMUSG00000001138	1430.97	-0.325118	0.0923884	-3.51903	0.00043312	0.00382328	-0.308344	0.0914141	1	ensembl_havana	36511867	36528237	ENSMUSG00000001138	Cnnm3	94218	protein_coding
ENSMUSG00000067653	12.062	-0.0399423	0.63604	-0.0627984	0.949927	0.978923	-0.00823362	0.29449	1	ensembl_havana	36530188	36536883	ENSMUSG00000067653	Ankrd23	78321	protein_coding
ENSMUSG00000079610	160.842	-0.285227	0.196627	-1.4506	0.146891	0.326393	-0.221339	0.180837	1	ensembl_havana	36537507	36547445	ENSMUSG00000079610	Ankrd39	109346	protein_coding
ENSMUSG00000026121	662.177	-0.138511	0.18283	-0.757596	0.448693	0.661685	-0.107487	0.162915	1	ensembl_havana	36548639	36558349	ENSMUSG00000026121	Sema4c	20353	protein_coding
ENSMUSG00000087589	7.4367	-0.334145	0.750201	-0.445407	0.656026	0.819988	-0.0551422	0.30896	1	havana	36557701	36565613	ENSMUSG00000087589	D430040D24Rik		processed_transcript
ENSMUSG00000046337	485.587	0.628619	0.169703	3.70423	0.00021203	0.00209323	0.566954	0.171361	1	ensembl_havana	36562692	36683183	ENSMUSG00000046337	Fam178b	381337	protein_coding
ENSMUSG00000061518	3418.92	-0.199143	0.0813299	-2.44859	0.0143417	0.0608646	-0.189307	0.0798565	1	ensembl_havana	36691449	36693681	ENSMUSG00000061518	Cox5b	12859	protein_coding
ENSMUSG00000037351	3673.44	-0.0925763	0.121262	-0.763442	0.4452	0.658951	-0.0814352	0.114489	1	ensembl_havana	36698114	36714422	ENSMUSG00000037351	Actr1b	226977	protein_coding
ENSMUSG00000026117	30.4021	0.715281	0.648032	1.10377	0.269691	0.486052	0.162275	0.339029	1	ensembl_havana	36761798	36782818	ENSMUSG00000026117	Zap70	22637	protein_coding
ENSMUSG00000026116	8713.32	-0.24356	0.142894	-1.70448	0.0882916	0.230934	-0.21159	0.13612	1	ensembl_havana	36792191	36943666	ENSMUSG00000026116	Tmem131	56030	protein_coding
ENSMUSG00000103016	3.76446	0.655162	1.07184	0.611252	0.541033		0.0586603	0.324064	1	havana	36871903	36872045	ENSMUSG00000103016	Gm37506		TEC
ENSMUSG00000050122	362.508	1.35962	0.399373	3.40438	0.00066314	0.0053885	1.11826	0.435012	1	ensembl_havana	37026596	37187613	ENSMUSG00000050122	Vwa3b	70853	protein_coding
ENSMUSG00000026114	188.576	1.0436	0.813442	1.28294	0.199513	0.399808	0.16093	0.358187	1	ensembl_havana	37214434	37263384	ENSMUSG00000026114	Cnga3	12790	protein_coding
ENSMUSG00000026113	244.253	0.467559	0.156941	2.9792	0.00289004	0.0175145	0.415655	0.155707	1	ensembl_havana	37299865	37410736	ENSMUSG00000026113	Inpp4a	269180	protein_coding
ENSMUSG00000026112	3206.35	-0.0990251	0.109883	-0.901188	0.367489	0.589804	-0.089372	0.104853	1	ensembl_havana	37417084	37430103	ENSMUSG00000026112	Coa5	76178	protein_coding
ENSMUSG00000026111	607.579	-0.193997	0.127423	-1.52246	0.127894	0.298243	-0.171608	0.121531	1	ensembl_havana	37430139	37439124	ENSMUSG00000026111	Unc50	67387	protein_coding
ENSMUSG00000026110	485.023	0.149042	0.141206	1.05549	0.291199	0.509332	0.127745	0.131931	1	ensembl_havana	37439340	37541016	ENSMUSG00000026110	Mgat4a	269181	protein_coding
ENSMUSG00000026090	31.0998	0.518488	0.552182	0.93898	0.347741	0.569548	0.147662	0.315968	1	ensembl_havana	37611677	37720085	ENSMUSG00000026090	2010300C02Rik	72097	protein_coding
ENSMUSG00000060771	141.705	0.25432	0.240455	1.05766	0.29021	0.508143	0.174448	0.207023	1	ensembl_havana	37754776	37866429	ENSMUSG00000060771	Tsga10	211484	protein_coding
ENSMUSG00000037216	206.992	-0.319362	0.160024	-1.99571	0.0459654	0.144911	-0.271982	0.153505	1	ensembl_havana	37871738	37876228	ENSMUSG00000037216	Lipt1	623661	protein_coding
ENSMUSG00000026088	457.426	-0.166377	0.124457	-1.33682	0.181281	0.375467	-0.147387	0.118409	1	ensembl_havana	37874801	37890411	ENSMUSG00000026088	Mitd1	69028	protein_coding
ENSMUSG00000026087	1620.32	-0.0322859	0.116933	-0.276105	0.782467	0.895492	-0.0285331	0.110355	1	ensembl_havana	37890477	37898535	ENSMUSG00000026087	Mrpl30	107734	protein_coding
ENSMUSG00000058407	2448.04	-0.0131923	0.0830723	-0.158806	0.873822	0.942803	-0.0123081	0.080595	1	ensembl_havana	37985189	37997893	ENSMUSG00000058407	Txndc9	98258	protein_coding
ENSMUSG00000026083	7075.9	0.0847987	0.0921245	0.920479	0.357322	0.579193	0.0792668	0.0890268	1	ensembl_havana	37998010	38055579	ENSMUSG00000026083	Eif5b	226982	protein_coding
ENSMUSG00000026082	3188.69	-0.117391	0.0975505	-1.20339	0.228826	0.43666	-0.108196	0.0941448	1	ensembl_havana	38052786	38129801	ENSMUSG00000026082	Rev1	56210	protein_coding
ENSMUSG00000103804	15.7915	-0.187581	0.572756	-0.327506	0.743285	0.873522	-0.0472669	0.290542	1	havana	38076295	38077305	ENSMUSG00000103804	Gm37062		sense_intronic
ENSMUSG00000037138	918.932	-0.628379	0.124265	-5.05678	4.26401e-07	1.04697e-05	-0.596312	0.125061	1	ensembl_havana	38177326	38664955	ENSMUSG00000037138	Aff3	16764	protein_coding
ENSMUSG00000048814	27.9813	0.64649	0.421958	1.53212	0.125493	0.294924	0.302795	0.347874	1	ensembl_havana	38793645	38836711	ENSMUSG00000048814	Lonrf2	381338	protein_coding
ENSMUSG00000026080	366.57	-0.145993	0.167493	-0.871635	0.383407	0.604262	-0.117499	0.152175	1	ensembl_havana	38863867	38898161	ENSMUSG00000026080	Chst10	98388	protein_coding
ENSMUSG00000026078	1270.52	0.0757696	0.111929	0.676944	0.498441	0.701826	0.0683083	0.106402	1	ensembl_havana	38985608	38997238	ENSMUSG00000026078	Pdcl3	68833	protein_coding
ENSMUSG00000103046	24.1959	-0.449619	0.418347	-1.07475	0.282486	0.499108	-0.189944	0.29725	1	havana	38992678	38994316	ENSMUSG00000103046	Gm37309		TEC
ENSMUSG00000026077	8.96802	0.74734	0.715536	1.04445	0.296279	0.514536	0.142682	0.33632	1	ensembl_havana	39193731	39363236	ENSMUSG00000026077	Npas2	18143	protein_coding
ENSMUSG00000073702	19387.2	-0.0488561	0.0803949	-0.607702	0.543385	0.737611	-0.0463277	0.0781877	1	ensembl_havana	39367842	39371911	ENSMUSG00000073702	Rpl31	114641	protein_coding
ENSMUSG00000003134	248.5	0.895151	0.268128	3.33853	0.000842236	0.00653284	0.758549	0.279793	1	ensembl_havana	39371492	39478755	ENSMUSG00000003134	Tbc1d8	54610	protein_coding
ENSMUSG00000003135	1856.25	-0.0428758	0.0811094	-0.528617	0.597071	0.778317	-0.0404231	0.0788429	1	ensembl_havana	39534992	39546889	ENSMUSG00000003135	Cnot11	52846	protein_coding
ENSMUSG00000085894	59.1113	0.0409933	0.272169	0.150617	0.880277	0.946213	0.0248349	0.210856	1	havana	39547570	39552002	ENSMUSG00000085894	Gm15832		processed_transcript
ENSMUSG00000077704	22.7547	0.922356	0.489998	1.88237	0.059786	0.175233	0.41591	0.45825	1	ensembl	39548745	39548854	ENSMUSG00000077704	Snord89	100217461	snoRNA
ENSMUSG00000048234	1244.6	0.0435648	0.0920961	0.473037	0.636187	0.805847	0.0406363	0.0888217	1	ensembl_havana	39551296	39577405	ENSMUSG00000048234	Rnf149	67702	protein_coding
ENSMUSG00000064936	3.95432	-1.00533	1.00158	-1.00374	0.315503		-0.104503	0.336664	1	ensembl	39573746	39573875	ENSMUSG00000064936	Gm23722	115485772	snoRNA
ENSMUSG00000050967	16.2724	0.799645	0.599353	1.33418	0.182145	0.376521	0.217581	0.363082	1	ensembl_havana	39618406	39651474	ENSMUSG00000050967	Creg2	263764	protein_coding
ENSMUSG00000097083	49.1154	1.72927	0.390368	4.42984	9.43013e-06	0.000149429	1.55071	0.409673	1	havana	39650176	39657390	ENSMUSG00000097083	D930019O06Rik		antisense
ENSMUSG00000101634	9.25084	1.3199	0.686941	1.92141	0.0546796	0.164667	0.361434	0.527233	1	havana	39839175	39847334	ENSMUSG00000101634	1700066B17Rik	73426	lincRNA
ENSMUSG00000026074	7239.35	0.0259254	0.100413	0.258188	0.796262	0.903596	0.0240719	0.0961573	1	ensembl_havana	39900913	40026310	ENSMUSG00000026074	Map4k4	26921	protein_coding
ENSMUSG00000026073	16.22	-0.0124454	0.526484	-0.0236387	0.981141	0.992886	-0.00319544	0.280905	1	ensembl_havana	40074079	40125231	ENSMUSG00000026073	Il1r2	16178	protein_coding
ENSMUSG00000026072	33.1493	1.43218	0.529951	2.70247	0.00688256	0.0345484	0.961389	0.637822	1	ensembl_havana	40225080	40317257	ENSMUSG00000026072	Il1r1	16177	protein_coding
ENSMUSG00000070942	32.4779	1.00175	0.455979	2.19692	0.0280264	0.100364	0.567919	0.494101	1	ensembl_havana	40324610	40367562	ENSMUSG00000070942	Il1rl2	107527	protein_coding
ENSMUSG00000026062	8.16141	0.237204	0.829515	0.285955	0.774913	0.890847	0.0333154	0.310301	1	ensembl_havana	40680574	40769273	ENSMUSG00000026062	Slc9a2	226999	protein_coding
ENSMUSG00000041945	54.1517	-0.627681	0.425093	-1.47657	0.13979	0.315806	-0.284149	0.341461	1	ensembl_havana	40772038	40790687	ENSMUSG00000041945	Mfsd9	211798	protein_coding
ENSMUSG00000045515	12.3846	-0.679993	0.599468	-1.13433	0.256657	0.471221	-0.176211	0.33775	1	ensembl_havana	42694925	42703176	ENSMUSG00000045515	Pou3f3	18993	protein_coding
ENSMUSG00000060679	1687.95	0.013263	0.083274	0.159269	0.873457	0.942577	0.0125604	0.0807762	1	ensembl_havana	42851233	42905683	ENSMUSG00000060679	Mrps9	69527	protein_coding
ENSMUSG00000041907	4.72022	-0.883027	1.16215	-0.759825	0.447359		-0.0670918	0.328837	1	ensembl_havana	42952872	43035456	ENSMUSG00000041907	Gpr45	93690	protein_coding
ENSMUSG00000070939	458.892	-0.164941	0.18986	-0.868752	0.384983	0.605822	-0.126084	0.1689	1	ensembl_havana	43047200	43098637	ENSMUSG00000070939	Tgfbrap1	73122	protein_coding
ENSMUSG00000010290	979.327	-0.171748	0.110832	-1.54963	0.12123	0.28858	-0.155952	0.106625	1	ensembl_havana	43098710	43115947	ENSMUSG00000010290	AI597479	98404	protein_coding
ENSMUSG00000008136	14.4166	-0.247757	0.557906	-0.444083	0.656982	0.820706	-0.0654335	0.291527	1	ensembl_havana	43123074	43196984	ENSMUSG00000008136	Fhl2	14200	protein_coding
ENSMUSG00000094497	3618.95	-0.139656	0.0806098	-1.7325	0.0831855	0.221371	-0.132176	0.0787902	1	ensembl_havana	43189156	43189638	ENSMUSG00000094497	Gm8210		processed_pseudogene
ENSMUSG00000099576	2.2908	1.30648	1.50403	0.868653	0.385037		0.0618486	0.33265	1	havana	43250156	43302925	ENSMUSG00000099576	Gm29040		lincRNA
ENSMUSG00000066877	462.269	-0.296648	0.139222	-2.13075	0.0331094	0.113539	-0.261286	0.134551	1	ensembl_havana	43444579	43570515	ENSMUSG00000066877	Nck2	17974	protein_coding
ENSMUSG00000103945	53.541	-0.258346	0.323986	-0.7974	0.425219	0.642173	-0.137301	0.245759	1	havana	43560273	43561565	ENSMUSG00000103945	Gm38228		TEC
ENSMUSG00000026051	7.63832	-1.35262	0.776269	-1.74247	0.081427	0.217974	-0.263409	0.436379	1	ensembl_havana	43730602	43742578	ENSMUSG00000026051	Ecrg4	78896	protein_coding
ENSMUSG00000100480	3.14847	0.145455	1.21078	0.120133	0.904378		0.0103674	0.320514	1	havana	43745784	43746282	ENSMUSG00000100480	Gm29156		lincRNA
ENSMUSG00000057363	822.742	0.378108	0.111786	3.38242	0.000718491	0.00575556	0.353817	0.110667	1	ensembl_havana	43746966	43827800	ENSMUSG00000057363	Uxs1	67883	protein_coding
ENSMUSG00000100701	2.82855	0.484986	1.14174	0.424779	0.670998		0.0382475	0.321845	1	havana	43888051	43888595	ENSMUSG00000100701	Gm19587		processed_pseudogene
ENSMUSG00000041763	5627	-0.00231558	0.0906742	-0.0255374	0.979626	0.99227	-0.00207445	0.087471	1	ensembl_havana	43933647	44003000	ENSMUSG00000041763	Tpp2	22019	protein_coding
ENSMUSG00000091844	5.94781	-0.192786	1.11591	-0.172761	0.862839	0.938074	-0.01544	0.318808	1	ensembl_havana	44055872	44079746	ENSMUSG00000091844	Gm8251	102636082	protein_coding
ENSMUSG00000026049	708.542	0.227674	0.14134	1.61082	0.10722	0.264534	0.197403	0.1343	1	ensembl_havana	44086613	44102441	ENSMUSG00000026049	Tex30	75623	protein_coding
ENSMUSG00000026047	603.886	-0.0771737	0.177454	-0.434895	0.663639	0.825092	-0.0600661	0.157353	1	ensembl_havana	44106546	44118808	ENSMUSG00000026047	Poglut2	72050	protein_coding
ENSMUSG00000041684	677.821	-0.296494	0.121938	-2.43151	0.0150361	0.063144	-0.269062	0.118927	1	ensembl_havana	44118957	44144770	ENSMUSG00000041684	Bivm	246229	protein_coding
ENSMUSG00000026048	1037.31	-0.322262	0.197758	-1.62958	0.103191	0.258312	-0.252375	0.184291	1	ensembl_havana	44147744	44181260	ENSMUSG00000026048	Ercc5	22592	protein_coding
ENSMUSG00000046828	1.92964	1.64723	2.1781	0.756267	0.449489		0.0365274	0.331745	1	ensembl_havana	44204070	44218961	ENSMUSG00000046828	Mettl21e	403183	protein_coding
ENSMUSG00000056870	110.595	-1.24499	0.39685	-3.13717	0.00170586	0.0115529	-0.982295	0.43627	1	ensembl_havana	44551511	44796838	ENSMUSG00000056870	Gulp1	70676	protein_coding
ENSMUSG00000026043	2.54454	-2.06293	1.83381	-1.12494	0.260615		-0.0636848	0.336539	1	ensembl_havana	45311538	45349706	ENSMUSG00000026043	Col3a1	12825	protein_coding
ENSMUSG00000026042	109.716	0.268185	0.282283	0.950057	0.342083	0.563527	0.163515	0.23006	1	ensembl_havana	45374321	45503282	ENSMUSG00000026042	Col5a2	12832	protein_coding
ENSMUSG00000025995	7158.56	-0.0490097	0.0718147	-0.682447	0.494956	0.698871	-0.0468208	0.0702371	1	ensembl_havana	45795166	45823619	ENSMUSG00000025995	Wdr75	73674	protein_coding
ENSMUSG00000084817	60.6052	0.136728	0.31107	0.439542	0.660269	0.822988	0.0740468	0.230897	1	havana	45857332	45857754	ENSMUSG00000084817	Gm5526		processed_pseudogene
ENSMUSG00000099381	2.63598	0.759481	1.43961	0.527561	0.597804		0.0387449	0.32689	1	havana	45905623	45906798	ENSMUSG00000099381	Gm18303	100416885	processed_pseudogene
ENSMUSG00000025993	1031.69	-0.929579	0.160405	-5.79521	6.82339e-09	2.75002e-07	-0.883915	0.162777	1	ensembl_havana	45908068	45926523	ENSMUSG00000025993	Slc40a1	53945	protein_coding
ENSMUSG00000041144	16.6655	0.116442	0.627736	0.185495	0.852841	0.933105	0.0258784	0.294599	1	ensembl_havana	46066315	46373550	ENSMUSG00000041144	Dnah7b	227058	protein_coding
ENSMUSG00000101262	11.4095	0.20869	0.613743	0.340028	0.733835	0.868198	0.0479987	0.295626	1	havana	46414502	46416932	ENSMUSG00000101262	Gm8326		processed_pseudogene
ENSMUSG00000101337	26.9173	0.753002	0.573951	1.31196	0.189533	0.386934	0.217663	0.35777	1	ensembl_havana	46425592	46807476	ENSMUSG00000101337	Dnah7c	100101919	protein_coding
ENSMUSG00000025986	6401.83	-0.124787	0.107107	-1.16507	0.243989	0.455695	-0.11342	0.102712	1	ensembl_havana	46807544	46892852	ENSMUSG00000025986	Slc39a10	227059	protein_coding
ENSMUSG00000100213	11.7332	-0.0481161	0.730675	-0.0658515	0.947496	0.977864	-0.00791767	0.302385	1	havana	46849529	46850479	ENSMUSG00000100213	Gm28151		lincRNA
ENSMUSG00000101447	5.73832	1.51112	0.952166	1.58704	0.112504	0.27375	0.187622	0.385025	1	havana	47153461	47189071	ENSMUSG00000101447	Gm28826		lincRNA
ENSMUSG00000081185	6.3679	0.263282	0.83101	0.316822	0.751378	0.878072	0.036649	0.310912	1	ensembl_havana	47365644	47366372	ENSMUSG00000081185	Gm4852		processed_pseudogene
ENSMUSG00000100033	46.6422	0.0332	0.3683	0.0901439	0.928173	0.969702	0.0152493	0.246808	1	havana	47657693	47659630	ENSMUSG00000100033	Gm8337	666869	processed_pseudogene
ENSMUSG00000100816	23.6568	0.855261	0.509319	1.67922	0.0931086	0.240013	0.334667	0.415474	1	havana	50815375	50817701	ENSMUSG00000100816	Gm28321	102633780	lincRNA
ENSMUSG00000026109	15.3715	-1.07121	0.519823	-2.06071	0.0393305	0.128877	-0.498885	0.536772	1	ensembl_havana	50900647	51187270	ENSMUSG00000026109	Tmeff2	56363	protein_coding
ENSMUSG00000026107	1267.92	0.0331775	0.133169	0.249138	0.803254	0.907402	0.0286523	0.123696	1	ensembl_havana	51465862	51478425	ENSMUSG00000026107	Nabp1	109019	protein_coding
ENSMUSG00000099413	12.636	0.482581	0.645327	0.747808	0.454576	0.667283	0.105557	0.313159	1	havana	51507086	51596718	ENSMUSG00000099413	Gm17767	100045066	lincRNA
ENSMUSG00000018417	2725.83	0.843691	0.0827828	10.1916	2.16127e-24	2.17279e-21	0.831423	0.0831065	1	ensembl_havana	51749765	51916071	ENSMUSG00000018417	Myo1b	17912	protein_coding
ENSMUSG00000072324	128.092	0.230735	0.213717	1.07963	0.280308	0.497202	0.169094	0.188728	1	havana	51940664	51941261	ENSMUSG00000072324	Gm8420	667014	processed_pseudogene
ENSMUSG00000062939	142.781	0.0243831	0.256277	0.0951434	0.924201	0.967882	0.0156081	0.202984	1	ensembl_havana	51987148	52107189	ENSMUSG00000062939	Stat4	20849	protein_coding
ENSMUSG00000078291	3.83619	-0.161358	1.10052	-0.14662	0.883432		-0.0132604	0.318332	1	ensembl_havana	52090635	52091066	ENSMUSG00000078291	Gm3940	100042634	processed_pseudogene
ENSMUSG00000109599	2.51629	-0.231758	1.74346	-0.13293	0.894249		-0.00795643	0.326419	1	havana	52108121	52113751	ENSMUSG00000109599	Gm31812		lincRNA
ENSMUSG00000026104	80.4079	0.578517	0.275852	2.0972	0.0359755	0.120759	0.4184	0.269894	1	ensembl_havana	52119440	52161865	ENSMUSG00000026104	Stat1	20846	protein_coding
ENSMUSG00000026103	2450.56	-0.324596	0.104621	-3.10258	0.00191841	0.0126495	-0.30289	0.103146	1	ensembl_havana	52163448	52233232	ENSMUSG00000026103	Gls	14660	protein_coding
ENSMUSG00000002881	557.804	0.526724	0.148112	3.55625	0.000376191	0.00341231	0.480215	0.148286	1	ensembl_havana	52457294	52500679	ENSMUSG00000002881	Nab1	17936	protein_coding
ENSMUSG00000097833	14.0258	4.0208	1.00949	3.98302	6.80454e-05	0.000810632	3.46589	1.06255	1	havana	52503234	52504229	ENSMUSG00000097833	Gm5976	546736	processed_pseudogene
ENSMUSG00000100007	75.1273	-0.407834	0.290473	-1.40403	0.160308	0.345886	-0.256289	0.25297	1	havana	52584518	52585159	ENSMUSG00000100007	Gm5527		processed_pseudogene
ENSMUSG00000043015	440.123	-0.00676439	0.155831	-0.0434085	0.965376	0.986031	-0.0053484	0.141084	1	ensembl_havana	52630703	52651919	ENSMUSG00000043015	Nemp2	227094	protein_coding
ENSMUSG00000041439	95.0224	-0.274045	0.42419	-0.646045	0.51825	0.717596	-0.106927	0.274039	1	ensembl_havana	52656286	52727462	ENSMUSG00000041439	Mfsd6	98682	protein_coding
ENSMUSG00000026102	150.006	-0.0388591	0.25133	-0.154614	0.877126	0.944565	-0.0251787	0.200769	1	ensembl_havana	52785427	52817688	ENSMUSG00000026102	Inpp1	16329	protein_coding
ENSMUSG00000041426	380.849	-0.0398248	0.160249	-0.248518	0.803734	0.907526	-0.0321056	0.144528	1	ensembl_havana	52844929	52920986	ENSMUSG00000041426	Hibch	227095	protein_coding
ENSMUSG00000043629	1407.53	0.313634	0.126665	2.4761	0.0132826	0.0575164	0.283434	0.123629	1	ensembl_havana	52922324	53020179	ENSMUSG00000043629	1700019D03Rik	67080	protein_coding
ENSMUSG00000060715	79.7747	1.49742	0.521486	2.87145	0.00408598	0.0231063	1.0718	0.616075	1	ensembl_havana	53158577	53187636	ENSMUSG00000060715	1700019A02Rik	69397	protein_coding
ENSMUSG00000026098	896.664	-0.186909	0.129516	-1.44314	0.148981	0.329283	-0.164434	0.123161	1	ensembl_havana	53189187	53297018	ENSMUSG00000026098	Pms1	227099	protein_coding
ENSMUSG00000026097	545.762	-0.123898	0.147718	-0.838745	0.401612	0.621958	-0.10456	0.136536	1	ensembl_havana	53297095	53310309	ENSMUSG00000026097	Ormdl1	227102	protein_coding
ENSMUSG00000026096	286.294	-0.496066	0.175075	-2.83345	0.00460491	0.0253438	-0.430778	0.173957	1	ensembl_havana	53313624	53326343	ENSMUSG00000026096	Osgepl1	72085	protein_coding
ENSMUSG00000026095	332.861	-0.0477763	0.125635	-0.380279	0.703739	0.847973	-0.0418309	0.117679	1	ensembl_havana	53344617	53352752	ENSMUSG00000026095	Asnsd1	70396	protein_coding
ENSMUSG00000096141	65.6231	1.36724	0.264233	5.17436	2.28698e-07	6.06822e-06	1.27123	0.271675	1	ensembl_havana	53397006	53706784	ENSMUSG00000096141	Dnah7a	627872	protein_coding
ENSMUSG00000026094	926.236	-0.256502	0.164847	-1.556	0.119707	0.286046	-0.212834	0.154759	1	ensembl_havana	53755506	53785224	ENSMUSG00000026094	Stk17b	98267	protein_coding
ENSMUSG00000042807	255.015	0.396519	0.197942	2.0032	0.0451553	0.143055	0.319324	0.189709	1	ensembl_havana	53806876	54195168	ENSMUSG00000042807	Hecw2	329152	protein_coding
ENSMUSG00000025983	17.9622	-0.301718	0.525301	-0.574371	0.565717	0.755013	-0.0880322	0.291253	1	ensembl_havana	54250683	54368727	ENSMUSG00000025983	Ccdc150	78016	protein_coding
ENSMUSG00000041303	2479.77	-0.1235	0.0950686	-1.29907	0.193921	0.392176	-0.114536	0.0919662	1	ensembl_havana	54396004	54438971	ENSMUSG00000041303	Gtf3c3	98488	protein_coding
ENSMUSG00000073678	3152.95	0.0299909	0.233812	0.12827	0.897936	0.955939	0.0205557	0.191358	1	ensembl_havana	54472994	54557684	ENSMUSG00000073678	Pgap1	241062	protein_coding
ENSMUSG00000104136	2.95751	1.003	1.28854	0.778396	0.436335		0.0638028	0.330188	1	havana	54518610	54520270	ENSMUSG00000104136	Gm36955		TEC
ENSMUSG00000052331	223.413	1.11739	0.255787	4.36843	1.25143e-05	0.000190142	1.01116	0.264918	1	ensembl_havana	54645340	54926387	ENSMUSG00000052331	Ankrd44	329154	protein_coding
ENSMUSG00000025982	16405.7	-0.0892614	0.0655888	-1.36092	0.173538	0.365326	-0.0866052	0.0644659	1	ensembl_havana	54985169	55027481	ENSMUSG00000025982	Sf3b1	81898	protein_coding
ENSMUSG00000025981	503.935	0.41094	0.148556	2.76623	0.00567084	0.0296931	0.365628	0.14632	1	ensembl_havana	55052770	55072702	ENSMUSG00000025981	Coq10b	67876	protein_coding
ENSMUSG00000101122	8.13428	0.716549	0.845109	0.847878	0.396506	0.617166	0.100022	0.327791	1	havana	55066264	55067069	ENSMUSG00000101122	Gm17971	100416214	processed_pseudogene
ENSMUSG00000025980	56512.5	0.0248336	0.0641975	0.386831	0.698882	0.844313	0.0241434	0.0629153	1	ensembl_havana	55077835	55088243	ENSMUSG00000025980	Hspd1	15510	protein_coding
ENSMUSG00000073676	11700.8	-0.0156233	0.0629882	-0.248035	0.804108	0.907526	-0.0150339	0.0618874	1	ensembl_havana	55088132	55091307	ENSMUSG00000073676	Hspe1	15528	protein_coding
ENSMUSG00000100736	1.78964	-0.785355	1.61957	-0.484917	0.627735		-0.0317913	0.327567	1	havana	55120080	55120873	ENSMUSG00000100736	Gm5147	381258	processed_pseudogene
ENSMUSG00000089670	3.75893	-0.377928	1.03417	-0.365442	0.714781		-0.0354239	0.318639	1	havana	55127297	55128287	ENSMUSG00000089670	Gm16581	100417585	processed_pseudogene
ENSMUSG00000025979	1749.66	-0.0849973	0.101824	-0.834746	0.403861	0.624403	-0.077721	0.0976822	1	ensembl_havana	55131231	55154899	ENSMUSG00000025979	Mob4	19070	protein_coding
ENSMUSG00000025978	7.29226	0.509367	0.744817	0.683882	0.494049	0.698299	0.087276	0.316548	1	ensembl_havana	55170159	55226782	ENSMUSG00000025978	Rftn2	74013	protein_coding
ENSMUSG00000097649	1.95987	0.493964	1.77983	0.277534	0.78137		0.0167697	0.32713	1	havana	55226251	55235622	ENSMUSG00000097649	Gm10561		antisense
ENSMUSG00000046994	715.029	0.198641	0.119175	1.66681	0.095553	0.244434	0.178732	0.114458	1	ensembl_havana	55237177	55248470	ENSMUSG00000046994	Mars2	212679	protein_coding
ENSMUSG00000025977	65.9506	0.159582	0.276855	0.576408	0.564339	0.753897	0.0960891	0.217929	1	ensembl_havana	55248658	55363469	ENSMUSG00000025977	Boll	75388	protein_coding
ENSMUSG00000100215	4.15331	-0.605528	0.948064	-0.6387	0.523018		-0.0673267	0.3221	1	havana	55335401	55335796	ENSMUSG00000100215	Gm8292	666793	processed_pseudogene
ENSMUSG00000038349	6.20455	1.4665	0.99277	1.47718	0.139628	0.315614	0.162564	0.369325	1	ensembl_havana	55405921	55754285	ENSMUSG00000038349	Plcl1	227120	protein_coding
ENSMUSG00000100309	51.4426	0.42805	0.286211	1.49558	0.134764	0.308304	0.276273	0.254038	1	havana	55444074	55445024	ENSMUSG00000100309	Gm6644		processed_pseudogene
ENSMUSG00000099950	5.14198	0.998329	1.20482	0.828611	0.407325	0.627365	0.0713198	0.331123	1	havana	55931241	55972328	ENSMUSG00000099950	9130227L01Rik	329159	lincRNA
ENSMUSG00000038331	157.557	1.03098	0.219663	4.69345	2.6864e-06	5.10641e-05	0.9498	0.225478	1	ensembl_havana	56793981	56978650	ENSMUSG00000038331	Satb2	212712	protein_coding
ENSMUSG00000087022	1.65282	1.20248	1.51766	0.792322	0.428173		0.0565469	0.331128	1	havana	56971412	57050084	ENSMUSG00000087022	9130024F11Rik		processed_transcript
ENSMUSG00000097519	70.1105	0.000525031	0.307929	0.00170504	0.99864	0.999468	0.000616525	0.225806	1	havana	57359222	57377544	ENSMUSG00000097519	4930558J18Rik	75323	lincRNA
ENSMUSG00000038323	278.766	0.232757	0.194304	1.1979	0.230956	0.43924	0.179464	0.175761	1	ensembl_havana	57377620	57385423	ENSMUSG00000038323	1700066M21Rik	73467	protein_coding
ENSMUSG00000048495	421.497	0.0731687	0.129704	0.564119	0.572673	0.76033	0.0639508	0.121234	1	ensembl_havana	57388237	57407101	ENSMUSG00000048495	Tyw5	68736	protein_coding
ENSMUSG00000025971	631.554	0.274453	0.106985	2.56535	0.0103071	0.0472872	0.25414	0.1047	1	ensembl_havana	57406328	57417953	ENSMUSG00000025971	Maip1	68115	protein_coding
ENSMUSG00000038305	138.6	-0.830576	0.289575	-2.86826	0.00412733	0.0232757	-0.661365	0.302807	1	ensembl_havana	57774162	57948394	ENSMUSG00000038305	Spats2l	67198	protein_coding
ENSMUSG00000054770	432.743	0.102637	0.145469	0.705561	0.480461	0.688559	0.0867633	0.134277	1	ensembl_havana	57955101	58018956	ENSMUSG00000054770	Kctd18	51960	protein_coding
ENSMUSG00000026039	3165.87	0.304665	0.122033	2.49659	0.0125395	0.0549031	0.28105	0.119245	1	ensembl_havana	57995971	58025899	ENSMUSG00000026039	Sgo2a	68549	protein_coding
ENSMUSG00000063558	49.2499	1.12674	0.398026	2.83082	0.00464294	0.0255221	0.840532	0.439656	1	ensembl_havana	58029931	58106413	ENSMUSG00000063558	Aox1	11761	protein_coding
ENSMUSG00000064294	119.188	2.06693	0.359016	5.75721	8.5518e-09	3.3789e-07	1.94271	0.369421	1	ensembl_havana	58113130	58200698	ENSMUSG00000064294	Aox3	71724	protein_coding
ENSMUSG00000038242	55.5895	1.58556	0.618901	2.5619	0.0104102	0.0476503	0.918617	0.841309	1	ensembl_havana	58210397	58268597	ENSMUSG00000038242	Aox4	71872	protein_coding
ENSMUSG00000079554	3.91339	1.92394	1.16833	1.64673	0.0996125		0.162204	0.375508	1	ensembl_havana	58278326	58380259	ENSMUSG00000079554	Aox2	213043	protein_coding
ENSMUSG00000103839	29.4875	0.381209	0.381644	0.998859	0.317863	0.538027	0.177255	0.279228	1	havana	58383512	58386134	ENSMUSG00000103839	Gm37607		TEC
ENSMUSG00000051223	23986.1	-0.147125	0.0867529	-1.69591	0.0899038	0.234086	-0.138618	0.0845671	1	ensembl_havana	58392898	58407353	ENSMUSG00000051223	Bzw1	66882	protein_coding
ENSMUSG00000026034	2949.33	-0.12077	0.0999671	-1.2081	0.22701	0.434706	-0.111044	0.0963366	1	ensembl_havana	58410189	58424066	ENSMUSG00000026034	Clk1	12747	protein_coding
ENSMUSG00000026035	836.588	-0.34628	0.092558	-3.74122	0.000183126	0.00185442	-0.329052	0.0917413	1	ensembl_havana	58430994	58445486	ENSMUSG00000026035	Ppil3	70225	protein_coding
ENSMUSG00000026036	2052.83	-0.318224	0.100684	-3.16063	0.00157431	0.0108083	-0.298561	0.0993133	1	ensembl_havana	58445151	58481816	ENSMUSG00000026036	Nif3l1	65102	protein_coding
ENSMUSG00000026037	5128.83	0.0839534	0.100956	0.831588	0.405641	0.625841	0.0771076	0.0969081	1	ensembl_havana	58462771	58505109	ENSMUSG00000026037	Orc2	18393	protein_coding
ENSMUSG00000094245	6.0583	-0.357057	0.836858	-0.426663	0.669625	0.828765	-0.0486658	0.313097	1	ensembl	58466515	58466621	ENSMUSG00000094245	Gm23966		snRNA
ENSMUSG00000085054	12.2106	0.62919	0.568544	1.10667	0.268437	0.484891	0.17729	0.332259	1	havana	58505148	58523230	ENSMUSG00000085054	Gm15834		lincRNA
ENSMUSG00000038174	611.133	0.152983	0.101829	1.50236	0.133004	0.305863	0.140923	0.0983545	1	ensembl_havana	58522806	58586323	ENSMUSG00000038174	Fam126b	213056	protein_coding
ENSMUSG00000026032	923.318	-0.085188	0.0924554	-0.921396	0.356844	0.578788	-0.0791337	0.0893266	1	ensembl_havana	58586384	58595964	ENSMUSG00000026032	Ndufb3	66495	protein_coding
ENSMUSG00000059647	13.9537	0.124885	0.601093	0.207763	0.835414	0.923924	0.0296406	0.29205	1	havana	58646688	58647239	ENSMUSG00000059647	Cbx3-ps7		processed_pseudogene
ENSMUSG00000026031	193.577	-1.3246	0.23293	-5.6867	1.29517e-08	4.83247e-07	-1.24786	0.238457	1	ensembl_havana	58711508	58758884	ENSMUSG00000026031	Cflar	12633	protein_coding
ENSMUSG00000026029	82.7681	-1.00813	0.382372	-2.63651	0.00837648	0.0402391	-0.721995	0.418564	1	ensembl_havana	58795374	58847503	ENSMUSG00000026029	Casp8	12370	protein_coding
ENSMUSG00000102719	17.599	-0.512464	0.484777	-1.05711	0.29046	0.508431	-0.178887	0.313608	1	havana	58797783	58801623	ENSMUSG00000102719	Gm37760		TEC
ENSMUSG00000026028	1956.23	0.257938	0.109435	2.35699	0.0184239	0.0732262	0.237674	0.106736	1	ensembl_havana	58900449	58973430	ENSMUSG00000026028	Trak2	70827	protein_coding
ENSMUSG00000026027	180.748	0.114911	0.184238	0.62371	0.532818	0.729782	0.0887978	0.163081	1	ensembl_havana	58973522	58995715	ENSMUSG00000026027	Stradb	227154	protein_coding
ENSMUSG00000072295	15.3216	2.29013	0.825029	2.77582	0.00550633	0.0291176	1.4373	1.16385	1	ensembl_havana	58997116	59094900	ENSMUSG00000072295	C2cd6	73463	protein_coding
ENSMUSG00000038079	570.735	-0.378226	0.111064	-3.40548	0.00066047	0.00536921	-0.352603	0.109972	1	ensembl_havana	59100590	59120408	ENSMUSG00000038079	Tmem237	381259	protein_coding
ENSMUSG00000097573	5.2328	-0.728691	0.987098	-0.738215	0.460384	0.672283	-0.075591	0.326031	1	ensembl_havana	59119833	59122141	ENSMUSG00000097573	G730003C15Rik		antisense
ENSMUSG00000079550	5.42225	0.783424	0.950721	0.824031	0.409922	0.62912	0.0881546	0.328653	1	ensembl_havana	59120935	59163389	ENSMUSG00000079550	Mpp4	227157	protein_coding
ENSMUSG00000026024	3193.38	0.1595	0.0947215	1.68388	0.0922048	0.238363	0.14865	0.0919795	1	ensembl_havana	59162926	59237231	ENSMUSG00000026024	Als2	74018	protein_coding
ENSMUSG00000026023	8.71214	1.74869	0.97963	1.78505	0.0742526	0.203865	0.205614	0.405071	1	ensembl_havana	59256906	59352993	ENSMUSG00000026023	Cdk15	271697	protein_coding
ENSMUSG00000099922	2.77996	1.7158	1.35013	1.27084	0.203784		0.103808	0.345517	1	havana	59378930	59392299	ENSMUSG00000099922	Gm29016		lincRNA
ENSMUSG00000104502	2.79591	-0.489837	1.42372	-0.344054	0.730806		-0.0251685	0.324827	1	havana	59447865	59449502	ENSMUSG00000104502	Gm37737		TEC
ENSMUSG00000041075	6924.82	-0.676756	0.19162	-3.53175	0.000412813	0.00367631	-0.600828	0.194618	1	ensembl_havana	59482424	59486955	ENSMUSG00000041075	Fzd7	14369	protein_coding
ENSMUSG00000047361	73.4375	0.586412	0.381589	1.53676	0.124351	0.29313	0.303284	0.324983	1	ensembl_havana	59516264	59636417	ENSMUSG00000047361	Gm973	381260	protein_coding
ENSMUSG00000026021	5029.98	0.0711955	0.100023	0.711791	0.476594	0.685296	0.0660658	0.0960189	1	ensembl_havana	59586558	59670834	ENSMUSG00000026021	Sumo1	22218	protein_coding
ENSMUSG00000103821	29.7816	0.378792	0.376535	1.00599	0.314418	0.534747	0.178919	0.277673	1	havana	59646200	59648071	ENSMUSG00000103821	D430013B06Rik		TEC
ENSMUSG00000101400	2.59375	0.0177694	1.27265	0.0139625	0.98886		0.00128247	0.321316	1	havana	59673241	59673625	ENSMUSG00000101400	Gm29596		processed_pseudogene
ENSMUSG00000026020	14779	0.000932889	0.0726103	0.0128479	0.989749	0.996252	0.00206935	0.0709573	1	ensembl_havana	59684971	59719044	ENSMUSG00000026020	Nop58	55989	protein_coding
ENSMUSG00000077345	7.34072	-0.415552	0.745421	-0.557473	0.577204	0.763163	-0.0697825	0.311846	1	ensembl	59691934	59692020	ENSMUSG00000077345	Snord70		snoRNA
ENSMUSG00000089512	7.02279	-0.30282	0.778719	-0.388869	0.697373	0.843594	-0.0466635	0.309395	1	ensembl	59704258	59704338	ENSMUSG00000089512	Gm26287	115487683	snoRNA
ENSMUSG00000089093	4.81027	-0.532349	1.02954	-0.517076	0.605103		-0.0504449	0.321155	1	ensembl	59704790	59704873	ENSMUSG00000089093	Snord11		snoRNA
ENSMUSG00000067336	1096.64	-0.0286049	0.166452	-0.17185	0.863555	0.938326	-0.0225492	0.148912	1	ensembl_havana	59763400	59879014	ENSMUSG00000067336	Bmpr2	12168	protein_coding
[truncated: 21,094 more rows]

## Sheet: Ebs_96h_DEA_KOvsWT
	baseMean	log2FoldChange	lfcSE	stat	pvalue	padj	Shrunken_lFC	Shrunken_lFCSE	chrom	source	start	end	gene_id	gene_name	Entrez	gene_biotype
[truncated: 21,664 more rows]

[truncated: 1 more sheets: GSEA_mESCs_Ground_Naive]
