# Supplementary material for: Chromatin activity of IκBα mediates the exit from naïve pluripotency
Source: eLife. 2025 Oct 22;14:RP102784. doi: 10.7554/eLife.102784 (PMC12543326; doi:10.7554/eLife.102784)
Supplement: Supplementary file 4. [file elife-102784-supp4.xlsx]

## Sheet: Sheet1
Probe_ID	CpG_chrm	CpG_beg	CpG_end	target	design	mask	probe_strand	genesUniq	geneNames	transcriptTypes	transcriptIDs	distToTSS	CGI	CGIposition	WT_1_mESCs	WT_2_mESCs	WT_3_mESCs	mean_WT_0h	KO_1_mESCs	KO_2_mESCs	KO_3_mESCs	mean_KO_0h	mean_diff_WTvsKO_0h	logFC_WTvsKO_0h	P.Value_WTvsKO_0h	adj.P.Val_WTvsKO_0h	WT_1_EBs_96h	WT_2_EBs_96h	WT_3_EBs_96h	mean_WT_96h	KO_1_EBs_96h	KO_2_EBs_96h	KO_3_EBs_96h	mean_KO_96h	mean_diff_WTvsKO_96h	logFC_WTvsKO_96h	P.Value_WTvsKO_96h	adj.P.Val_WTvsKO_96h	DMPs	ICR
cg02245762_BC11	chr1	178329298	178329300	CG	Random	FALSE	-	Hnrnpu	Hnrnpu;Hnrnpu;Hnrnpu;Hnrnpu;Hnrnpu	protein_coding;protein_coding;protein_coding;protein_coding;protein_coding	ENSMUST00000037748.8;ENSMUST00000161769.7;ENSMUST00000162916.1;ENSMUST00000188044.6;ENSMUST00000189450.1	8499;8430;1022;1323;109			0.437898	0.644692	0.615201	0.565931	0.173475	0.159155	0.277349	0.203326	0.362604	2.40387	3.02207e-08	6.9418e-07	0.870011	0.859442	0.891989	0.873814	0.704797	0.690587	0.714977	0.703454	0.170361	1.55338	2.09563e-06	0.000146174	WTvsKO_0h	No
cg03830443_TC21	chr15	40658296	40658298	CG	EPIC;cg03830443	FALSE	-	Zfpm2	Zfpm2;Zfpm2;Zfpm2	protein_coding;protein_coding;protein_coding	ENSMUST00000053467.5;ENSMUST00000229777.1;ENSMUST00000230723.1	3262;3262;2946		Shelf	0.639493	0.676381	0.644387	0.65342	0.336084	0.274242	0.354923	0.32175	0.331671	1.99875	4.54249e-09	2.04336e-07	0.796921	0.815586	0.823817	0.812108	0.651652	0.612898	0.640232	0.634927	0.17718	1.31483	4.09879e-06	0.000174033	WTvsKO_0h	No
cg28120390_TC21	chr10	4434862	4434864	CG	GeneBody;1700052n19rik;NM_024261;inside_[cds_in_exon_2];splice=0	FALSE	+	Armt1	Armt1;Armt1;Armt1;Armt1;Armt1;Armt1;Armt1	protein_coding;protein_coding;protein_coding;protein_coding;protein_coding;protein_coding;protein_coding	ENSMUST00000095893.10;ENSMUST00000117489.7;ENSMUST00000118544.7;ENSMUST00000131636.1;ENSMUST00000134484.1;ENSMUST00000143037.7;ENSMUST00000152294.1	2396;2243;2350;282;2228;2236;2223		Shelf	0.54051	0.62287	0.634118	0.599166	0.253623	0.211264	0.324485	0.263124	0.336042	2.08903	1.19104e-08	3.76617e-07	0.855585	0.847927	0.869354	0.857622	0.727368	0.713696	0.737139	0.726068	0.131554	1.18634	7.45996e-06	0.000210388	WTvsKO_0h	No
cg28130224_TC11	chr10	5643555	5643557	CG	Random	FALSE	+	Vip	Vip;Vip	protein_coding;protein_coding	ENSMUST00000019906.5;ENSMUST00000217331.1	4338;3204			0.636877	0.806969	0.713943	0.719263	0.396019	0.306965	0.420105	0.374363	0.3449	2.14753	5.84565e-08	1.08007e-06	0.847487	0.868637	0.880988	0.865704	0.81769	0.753305	0.728217	0.766404	0.0993001	0.963298	0.00104055	0.00333373	WTvsKO_0h	No
cg28137431_TC21	chr10	6771288	6771290	CG	GeneBody;Oprm1;NM_001302795;inside_[intron_between_exon_1_and_2];splice=0	FALSE	+	Oprm1	Oprm1;Oprm1;Oprm1;Oprm1;Oprm1;Oprm1;Oprm1;Oprm1;Oprm1	protein_coding;protein_coding;protein_coding;protein_coding;protein_coding;protein_coding;protein_coding;protein_coding;protein_coding	ENSMUST00000056385.13;ENSMUST00000063036.13;ENSMUST00000092734.10;ENSMUST00000105597.7;ENSMUST00000105607.7;ENSMUST00000105615.8;ENSMUST00000143875.1;ENSMUST00000147171.7;ENSMUST00000150374.7	12696;12696;12696;12696;12696;12783;12696;12783;12696			0.511484	0.642762	0.575838	0.576695	0.234053	0.189497	0.270973	0.231508	0.345187	2.19653	4.57686e-09	2.05282e-07	0.763938	0.780546	0.777563	0.774016	0.649431	0.613314	0.627543	0.630096	0.14392	1.00761	2.3155e-05	0.000340746	WTvsKO_0h	No
cg28167738_BC11	chr10	10234872	10234874	CG	lincRNATSS;chr10:10234850;Gm31904;ENSMUST00000219446;23,lincRNATSS;chr10:10234971;4930598N05Rik;ENSMUST00000207733;97,lincRNATSS;chr10:10234991;4930598N05Rik;ENSMUST00000207048;117,lincRNATSS;chr10:10234994;4930598N05Rik;ENSMUST00000208693;120	FALSE	+	4930598N05Rik;Gm31904	4930598N05Rik;4930598N05Rik;4930598N05Rik;4930598N05Rik;4930598N05Rik;4930598N05Rik;4930598N05Rik;Gm31904	processed_transcript;processed_transcript;processed_transcript;processed_transcript;processed_transcript;processed_transcript;processed_transcript;lincRNA	ENSMUST00000207048.1;ENSMUST00000207288.1;ENSMUST00000207631.1;ENSMUST00000207733.1;ENSMUST00000208693.1;ENSMUST00000208935.1;ENSMUST00000208997.1;ENSMUST00000219446.1	-118;-128;-121;-98;-121;-588;50073;-22			0.564094	0.701509	0.636341	0.633981	0.306471	0.249289	0.343011	0.29959	0.334391	2.03939	2.19679e-08	5.62812e-07	0.865793	0.851468	0.868891	0.86205	0.749737	0.699372	0.711408	0.720172	0.141878	1.27816	8.74282e-06	0.00022342	WTvsKO_0h	No
cg28173848_BC21	chr10	11205271	11205273	CG	GeneBody;Shprh;NM_001284354;inside_[cds_in_exon_26];splice=1	FALSE	+	Shprh	Shprh;Shprh;Shprh;Shprh;Shprh	protein_coding;protein_coding;protein_coding;protein_coding;protein_coding	ENSMUST00000044053.12;ENSMUST00000054814.13;ENSMUST00000159541.7;ENSMUST00000159553.7;ENSMUST00000161910.1	55842;55748;55748;38815;253			0.5715	0.638862	0.604973	0.605112	0.299211	0.213208	0.28034	0.264253	0.340858	2.10833	3.47001e-09	1.73546e-07	0.765068	0.820836	0.763644	0.783182	0.667784	0.611604	0.556678	0.612022	0.17116	1.20009	0.000233801	0.00125526	WTvsKO_0h	No
cg28183048_BC21	chr10	12609274	12609276	CG	Enhancer	FALSE	+	Utrn	Utrn;Utrn;Utrn	protein_coding;protein_coding;protein_coding	ENSMUST00000076817.4;ENSMUST00000217994.1;ENSMUST00000218635.1	252461;5557;260091			0.107308	0.22932	0.237774	0.191468	0.0593335	0.0591866	0.0594586	0.0593262	0.132141	1.82502	1.17271e-06	9.03944e-06	0.651318	0.564359	0.699558	0.638411	0.293032	0.285059	0.295168	0.291086	0.347325	2.11572	1.97896e-06	0.000144599	WTvsKO_96h	No
cg28184871_BC21	chr10	12813331	12813333	CG	TSS;chr10:12813614;Utrn;ENSMUST00000217899;+283;2	FALSE	-	Utrn	Utrn;Utrn;Utrn;Utrn;Utrn;Utrn;Utrn;Utrn	protein_coding;protein_coding;protein_coding;protein_coding;protein_coding;protein_coding;protein_coding;protein_coding	ENSMUST00000076817.4;ENSMUST00000217899.1;ENSMUST00000218635.1;ENSMUST00000219130.1;ENSMUST00000219145.1;ENSMUST00000219163.1;ENSMUST00000219584.1;ENSMUST00000219660.1	48404;284;56034;13607;218;243;54840;54950			0.213991	0.302364	0.261019	0.259125	0.152309	0.168389	0.143958	0.154886	0.104239	0.922703	0.000403365	0.00085923	0.68827	0.65788	0.736957	0.694369	0.386577	0.362517	0.258893	0.335996	0.358373	2.19002	5.28161e-06	0.00018725	WTvsKO_96h	No
cg28187943_TC21	chr10	13087242	13087244	CG	MonoallelicMeth	FALSE	-	Plagl1	Plagl1	protein_coding	ENSMUST00000193426.5	26739		Shelf	0.499091	0.410403	0.368671	0.426055	0.0610904	0.0592233	0.085545	0.0686195	0.357435	3.34858	1.21858e-12	1.1061e-09	0.642752	0.561595	0.523917	0.576088	0.167402	0.14977	0.170226	0.162466	0.413622	2.8158	8.63893e-08	8.04472e-05	Common	No
cg28187945_BC21	chr10	13087436	13087438	CG	ZygoteMeth	FALSE	+	Plagl1	Plagl1	protein_coding	ENSMUST00000193426.5	26933		Shelf	0.520029	0.467607	0.456982	0.481539	0.0842941	0.057784	0.109244	0.0837739	0.397765	3.39192	1.35751e-12	1.21312e-09	0.603392	0.55376	0.50154	0.552897	0.181077	0.160303	0.135305	0.158895	0.394002	2.72262	1.28629e-07	9.53127e-05	Common	No
cg28187978_TC21	chr10	13089934	13089936	CG	ImprintDMR;chr10:13089891-13092325;M;DMR_Zac1,MonoallelicMeth	FALSE	+	Plagl1	Plagl1;Plagl1;Plagl1;Plagl1;Plagl1;Plagl1;Plagl1;Plagl1;Plagl1;Plagl1;Plagl1;Plagl1;Plagl1;Plagl1;Plagl1;Plagl1;Plagl1;Plagl1;Plagl1;Plagl1;Plagl1;Plagl1;Plagl1	protein_coding;protein_coding;protein_coding;protein_coding;protein_coding;protein_coding;protein_coding;protein_coding;protein_coding;protein_coding;protein_coding;protein_coding;protein_coding;protein_coding;protein_coding;protein_coding;protein_coding;protein_coding;protein_coding;protein_coding;protein_coding;protein_coding;protein_coding	ENSMUST00000121325.7;ENSMUST00000121646.7;ENSMUST00000121766.7;ENSMUST00000123135.7;ENSMUST00000124252.7;ENSMUST00000126880.7;ENSMUST00000129989.7;ENSMUST00000130449.7;ENSMUST00000130638.7;ENSMUST00000130800.7;ENSMUST00000130894.7;ENSMUST00000135095.7;ENSMUST00000135261.7;ENSMUST00000135826.7;ENSMUST00000138433.7;ENSMUST00000139262.7;ENSMUST00000141068.7;ENSMUST00000141944.7;ENSMUST00000143582.7;…	-897;-853;-900;-756;-853;-897;-897;-897;-906;-939;-897;-777;-897;-897;-897;-897;-897;-939;-1078;-897;-897;-897;29431		Shore	0.79731	0.794079	0.72971	0.7737	0.283242	0.23892	0.376352	0.299505	0.474195	3.03183	1.76104e-11	8.05916e-09	0.866699	0.842906	0.813198	0.840934	0.6578	0.600827	0.599278	0.619302	0.221633	1.7111	4.53505e-06	0.00017833	WTvsKO_0h	No
cg28187979_BC21	chr10	13089952	13089954	CG	ImprintDMR;chr10:13089891-13092325;M;DMR_Zac1	FALSE	+	Plagl1	Plagl1;Plagl1;Plagl1;Plagl1;Plagl1;Plagl1;Plagl1;Plagl1;Plagl1;Plagl1;Plagl1;Plagl1;Plagl1;Plagl1;Plagl1;Plagl1;Plagl1;Plagl1;Plagl1;Plagl1;Plagl1;Plagl1;Plagl1	protein_coding;protein_coding;protein_coding;protein_coding;protein_coding;protein_coding;protein_coding;protein_coding;protein_coding;protein_coding;protein_coding;protein_coding;protein_coding;protein_coding;protein_coding;protein_coding;protein_coding;protein_coding;protein_coding;protein_coding;protein_coding;protein_coding;protein_coding	ENSMUST00000121325.7;ENSMUST00000121646.7;ENSMUST00000121766.7;ENSMUST00000123135.7;ENSMUST00000124252.7;ENSMUST00000126880.7;ENSMUST00000129989.7;ENSMUST00000130449.7;ENSMUST00000130638.7;ENSMUST00000130800.7;ENSMUST00000130894.7;ENSMUST00000135095.7;ENSMUST00000135261.7;ENSMUST00000135826.7;ENSMUST00000138433.7;ENSMUST00000139262.7;ENSMUST00000141068.7;ENSMUST00000141944.7;ENSMUST00000143582.7;…	-879;-835;-882;-738;-835;-879;-879;-879;-888;-921;-879;-759;-879;-879;-879;-879;-879;-921;-1060;-879;-879;-879;29449		Shore	0.798214	0.736152	0.745973	0.760113	0.378324	0.36139	0.41697	0.385562	0.374552	2.34665	2.50325e-10	3.84646e-08	0.872952	0.845401	0.817745	0.845366	0.671337	0.628501	0.583407	0.627748	0.217618	1.70749	9.56184e-06	0.000231313	WTvsKO_0h	No
cg28187983_BC11	chr10	13090042	13090044	CG	ImprintDMR;chr10:13089891-13092325;M;DMR_Zac1,MonoallelicMeth	FALSE	+	Plagl1	Plagl1;Plagl1;Plagl1;Plagl1;Plagl1;Plagl1;Plagl1;Plagl1;Plagl1;Plagl1;Plagl1;Plagl1;Plagl1;Plagl1;Plagl1;Plagl1;Plagl1;Plagl1;Plagl1;Plagl1;Plagl1;Plagl1;Plagl1	protein_coding;protein_coding;protein_coding;protein_coding;protein_coding;protein_coding;protein_coding;protein_coding;protein_coding;protein_coding;protein_coding;protein_coding;protein_coding;protein_coding;protein_coding;protein_coding;protein_coding;protein_coding;protein_coding;protein_coding;protein_coding;protein_coding;protein_coding	ENSMUST00000121325.7;ENSMUST00000121646.7;ENSMUST00000121766.7;ENSMUST00000123135.7;ENSMUST00000124252.7;ENSMUST00000126880.7;ENSMUST00000129989.7;ENSMUST00000130449.7;ENSMUST00000130638.7;ENSMUST00000130800.7;ENSMUST00000130894.7;ENSMUST00000135095.7;ENSMUST00000135261.7;ENSMUST00000135826.7;ENSMUST00000138433.7;ENSMUST00000139262.7;ENSMUST00000141068.7;ENSMUST00000141944.7;ENSMUST00000143582.7;…	-789;-745;-792;-648;-745;-789;-789;-789;-798;-831;-789;-669;-789;-789;-789;-789;-789;-831;-970;-789;-789;-789;29539		Shore	0.86628	0.873151	0.811373	0.850268	0.25374	0.181578	0.286125	0.240481	0.609787	4.21039	2.32799e-14	4.31287e-11	0.927546	0.911278	0.85053	0.896451	0.637832	0.595228	0.461859	0.564973	0.331478	2.79833	1.20309e-05	0.000253362	Common	No
cg28187986_TC21	chr10	13090121	13090123	CG	ImprintDMR;chr10:13089891-13092325;M;DMR_Zac1,MonoallelicMeth	FALSE	+	Plagl1	Plagl1;Plagl1;Plagl1;Plagl1;Plagl1;Plagl1;Plagl1;Plagl1;Plagl1;Plagl1;Plagl1;Plagl1;Plagl1;Plagl1;Plagl1;Plagl1;Plagl1;Plagl1;Plagl1;Plagl1;Plagl1;Plagl1;Plagl1	protein_coding;protein_coding;protein_coding;protein_coding;protein_coding;protein_coding;protein_coding;protein_coding;protein_coding;protein_coding;protein_coding;protein_coding;protein_coding;protein_coding;protein_coding;protein_coding;protein_coding;protein_coding;protein_coding;protein_coding;protein_coding;protein_coding;protein_coding	ENSMUST00000121325.7;ENSMUST00000121646.7;ENSMUST00000121766.7;ENSMUST00000123135.7;ENSMUST00000124252.7;ENSMUST00000126880.7;ENSMUST00000129989.7;ENSMUST00000130449.7;ENSMUST00000130638.7;ENSMUST00000130800.7;ENSMUST00000130894.7;ENSMUST00000135095.7;ENSMUST00000135261.7;ENSMUST00000135826.7;ENSMUST00000138433.7;ENSMUST00000139262.7;ENSMUST00000141068.7;ENSMUST00000141944.7;ENSMUST00000143582.7;…	-710;-666;-713;-569;-666;-710;-710;-710;-719;-752;-710;-590;-710;-710;-710;-710;-710;-752;-891;-710;-710;-710;29618		Shore	0.640236	0.644072	0.580376	0.621562	0.271081	0.21303	0.305232	0.263114	0.358447	2.218	1.54911e-09	1.06996e-07	0.788315	0.775449	0.736993	0.766919	0.534869	0.537407	0.507631	0.526636	0.240283	1.56984	1.79167e-06	0.000141929	WTvsKO_0h	No
cg28187989_TC21	chr10	13090312	13090314	CG	EPIC;cg20443501,ImprintDMR;chr10:13089891-13092325;M;DMR_Zac1,MonoallelicMeth	FALSE	-	Plagl1	Plagl1;Plagl1;Plagl1;Plagl1;Plagl1;Plagl1;Plagl1;Plagl1;Plagl1;Plagl1;Plagl1;Plagl1;Plagl1;Plagl1;Plagl1;Plagl1;Plagl1;Plagl1;Plagl1;Plagl1;Plagl1;Plagl1;Plagl1	protein_coding;protein_coding;protein_coding;protein_coding;protein_coding;protein_coding;protein_coding;protein_coding;protein_coding;protein_coding;protein_coding;protein_coding;protein_coding;protein_coding;protein_coding;protein_coding;protein_coding;protein_coding;protein_coding;protein_coding;protein_coding;protein_coding;protein_coding	ENSMUST00000121325.7;ENSMUST00000121646.7;ENSMUST00000121766.7;ENSMUST00000123135.7;ENSMUST00000124252.7;ENSMUST00000126880.7;ENSMUST00000129989.7;ENSMUST00000130449.7;ENSMUST00000130638.7;ENSMUST00000130800.7;ENSMUST00000130894.7;ENSMUST00000135095.7;ENSMUST00000135261.7;ENSMUST00000135826.7;ENSMUST00000138433.7;ENSMUST00000139262.7;ENSMUST00000141068.7;ENSMUST00000141944.7;ENSMUST00000143582.7;…	-519;-475;-522;-378;-475;-519;-519;-519;-528;-561;-519;-399;-519;-519;-519;-519;-519;-561;-700;-519;-519;-519;29809		Shore	0.657285	0.664632	0.543799	0.621906	0.189736	0.145252	0.243585	0.192858	0.429048	2.82194	1.22798e-10	2.64655e-08	0.760713	0.727644	0.603441	0.697266	0.336347	0.341683	0.348398	0.342143	0.355123	2.17396	7.57191e-06	0.000211626	Common	Yes
cg28187993_BC11	chr10	13090456	13090458	CG	Random	FALSE	-	Plagl1	Plagl1;Plagl1;Plagl1;Plagl1;Plagl1;Plagl1;Plagl1;Plagl1;Plagl1;Plagl1;Plagl1;Plagl1;Plagl1;Plagl1;Plagl1;Plagl1;Plagl1;Plagl1;Plagl1;Plagl1;Plagl1;Plagl1;Plagl1	protein_coding;protein_coding;protein_coding;protein_coding;protein_coding;protein_coding;protein_coding;protein_coding;protein_coding;protein_coding;protein_coding;protein_coding;protein_coding;protein_coding;protein_coding;protein_coding;protein_coding;protein_coding;protein_coding;protein_coding;protein_coding;protein_coding;protein_coding	ENSMUST00000121325.7;ENSMUST00000121646.7;ENSMUST00000121766.7;ENSMUST00000123135.7;ENSMUST00000124252.7;ENSMUST00000126880.7;ENSMUST00000129989.7;ENSMUST00000130449.7;ENSMUST00000130638.7;ENSMUST00000130800.7;ENSMUST00000130894.7;ENSMUST00000135095.7;ENSMUST00000135261.7;ENSMUST00000135826.7;ENSMUST00000138433.7;ENSMUST00000139262.7;ENSMUST00000141068.7;ENSMUST00000141944.7;ENSMUST00000143582.7;…	-375;-331;-378;-234;-331;-375;-375;-375;-384;-417;-375;-255;-375;-375;-375;-375;-375;-417;-556;-375;-375;-375;29953		Shore	0.787194	0.777204	0.663144	0.742514	0.178745	0.149715	0.230117	0.186192	0.556322	3.70496	6.52234e-13	6.62941e-10	0.879042	0.775287	0.669156	0.774495	0.317472	0.305928	0.308266	0.310556	0.463939	3.03882	1.63289e-05	0.000289535	Common	Yes
cg28187994_TC11	chr10	13090500	13090502	CG	ImprintDMR;chr10:13089891-13092325;M;DMR_Zac1,MonoallelicMeth	FALSE	-	Plagl1	Plagl1;Plagl1;Plagl1;Plagl1;Plagl1;Plagl1;Plagl1;Plagl1;Plagl1;Plagl1;Plagl1;Plagl1;Plagl1;Plagl1;Plagl1;Plagl1;Plagl1;Plagl1;Plagl1;Plagl1;Plagl1;Plagl1;Plagl1	protein_coding;protein_coding;protein_coding;protein_coding;protein_coding;protein_coding;protein_coding;protein_coding;protein_coding;protein_coding;protein_coding;protein_coding;protein_coding;protein_coding;protein_coding;protein_coding;protein_coding;protein_coding;protein_coding;protein_coding;protein_coding;protein_coding;protein_coding	ENSMUST00000121325.7;ENSMUST00000121646.7;ENSMUST00000121766.7;ENSMUST00000123135.7;ENSMUST00000124252.7;ENSMUST00000126880.7;ENSMUST00000129989.7;ENSMUST00000130449.7;ENSMUST00000130638.7;ENSMUST00000130800.7;ENSMUST00000130894.7;ENSMUST00000135095.7;ENSMUST00000135261.7;ENSMUST00000135826.7;ENSMUST00000138433.7;ENSMUST00000139262.7;ENSMUST00000141068.7;ENSMUST00000141944.7;ENSMUST00000143582.7;…	-331;-287;-334;-190;-287;-331;-331;-331;-340;-373;-331;-211;-331;-331;-331;-331;-331;-373;-512;-331;-331;-331;29997		Shore	0.783688	0.67311	0.559218	0.672005	0.0295462	0.0135061	0.0471825	0.0300783	0.641927	6.26889	1.20211e-14	2.68388e-11	0.794758	0.640304	0.510022	0.648361	0.040771	0.0297876	0.0395978	0.0367188	0.611643	5.67498	1.25089e-07	9.37041e-05	Common	Yes
cg28187995_BC21	chr10	13090532	13090534	CG	ImprintDMR;chr10:13089891-13092325;M;DMR_Zac1,MonoallelicMeth	FALSE	+	Plagl1	Plagl1;Plagl1;Plagl1;Plagl1;Plagl1;Plagl1;Plagl1;Plagl1;Plagl1;Plagl1;Plagl1;Plagl1;Plagl1;Plagl1;Plagl1;Plagl1;Plagl1;Plagl1;Plagl1;Plagl1;Plagl1;Plagl1;Plagl1	protein_coding;protein_coding;protein_coding;protein_coding;protein_coding;protein_coding;protein_coding;protein_coding;protein_coding;protein_coding;protein_coding;protein_coding;protein_coding;protein_coding;protein_coding;protein_coding;protein_coding;protein_coding;protein_coding;protein_coding;protein_coding;protein_coding;protein_coding	ENSMUST00000121325.7;ENSMUST00000121646.7;ENSMUST00000121766.7;ENSMUST00000123135.7;ENSMUST00000124252.7;ENSMUST00000126880.7;ENSMUST00000129989.7;ENSMUST00000130449.7;ENSMUST00000130638.7;ENSMUST00000130800.7;ENSMUST00000130894.7;ENSMUST00000135095.7;ENSMUST00000135261.7;ENSMUST00000135826.7;ENSMUST00000138433.7;ENSMUST00000139262.7;ENSMUST00000141068.7;ENSMUST00000141944.7;ENSMUST00000143582.7;…	-299;-255;-302;-158;-255;-299;-299;-299;-308;-341;-299;-179;-299;-299;-299;-299;-299;-341;-480;-299;-299;-299;30029	CGI:chr10:13090532-13091299	Island	0.741425	0.667036	0.605712	0.671391	0.0733125	0.0737168	0.115603	0.0875442	0.583847	4.46278	1.09022e-14	2.5153e-11	0.805847	0.682016	0.603888	0.69725	0.0997812	0.104128	0.142501	0.11547	0.58178	4.21002	3.36093e-07	0.00011613	Common	Yes
cg28188001_TC11	chr10	13090596	13090598	CG	ImprintDMR;chr10:13089891-13092325;M;DMR_Zac1	FALSE	+	Plagl1	Plagl1;Plagl1;Plagl1;Plagl1;Plagl1;Plagl1;Plagl1;Plagl1;Plagl1;Plagl1;Plagl1;Plagl1;Plagl1;Plagl1;Plagl1;Plagl1;Plagl1;Plagl1;Plagl1;Plagl1;Plagl1;Plagl1;Plagl1	protein_coding;protein_coding;protein_coding;protein_coding;protein_coding;protein_coding;protein_coding;protein_coding;protein_coding;protein_coding;protein_coding;protein_coding;protein_coding;protein_coding;protein_coding;protein_coding;protein_coding;protein_coding;protein_coding;protein_coding;protein_coding;protein_coding;protein_coding	ENSMUST00000121325.7;ENSMUST00000121646.7;ENSMUST00000121766.7;ENSMUST00000123135.7;ENSMUST00000124252.7;ENSMUST00000126880.7;ENSMUST00000129989.7;ENSMUST00000130449.7;ENSMUST00000130638.7;ENSMUST00000130800.7;ENSMUST00000130894.7;ENSMUST00000135095.7;ENSMUST00000135261.7;ENSMUST00000135826.7;ENSMUST00000138433.7;ENSMUST00000139262.7;ENSMUST00000141068.7;ENSMUST00000141944.7;ENSMUST00000143582.7;…	-235;-191;-238;-94;-191;-235;-235;-235;-244;-277;-235;-115;-235;-235;-235;-235;-235;-277;-416;-235;-235;-235;30093	CGI:chr10:13090532-13091299	Island	0.769998	0.695208	0.605645	0.690284	0.0345227	0.0355135	0.0649332	0.0449898	0.645294	5.65627	5.54057e-16	2.95368e-12	0.802358	0.672138	0.586499	0.686998	0.0441372	0.0438667	0.122867	0.0702902	0.616708	5.09324	1.60506e-06	0.000140413	Common	Yes
cg28188014_BC21	chr10	13090763	13090765	CG	ImprintDMR;chr10:13089891-13092325;M;DMR_Zac1,TSS;chr10:13090787;Plagl1;ENSMUST00000121646;-24;1,TSS;chr10:13090831;Plagl1;ENSMUST00000121325;-68;1,TSS;chr10:13090834;Plagl1;ENSMUST00000121766;-71;1	FALSE	-	Plagl1	Plagl1;Plagl1;Plagl1;Plagl1;Plagl1;Plagl1;Plagl1;Plagl1;Plagl1;Plagl1;Plagl1;Plagl1;Plagl1;Plagl1;Plagl1;Plagl1;Plagl1;Plagl1;Plagl1;Plagl1;Plagl1;Plagl1;Plagl1	protein_coding;protein_coding;protein_coding;protein_coding;protein_coding;protein_coding;protein_coding;protein_coding;protein_coding;protein_coding;protein_coding;protein_coding;protein_coding;protein_coding;protein_coding;protein_coding;protein_coding;protein_coding;protein_coding;protein_coding;protein_coding;protein_coding;protein_coding	ENSMUST00000121325.7;ENSMUST00000121646.7;ENSMUST00000121766.7;ENSMUST00000123135.7;ENSMUST00000124252.7;ENSMUST00000126880.7;ENSMUST00000129989.7;ENSMUST00000130449.7;ENSMUST00000130638.7;ENSMUST00000130800.7;ENSMUST00000130894.7;ENSMUST00000135095.7;ENSMUST00000135261.7;ENSMUST00000135826.7;ENSMUST00000138433.7;ENSMUST00000139262.7;ENSMUST00000141068.7;ENSMUST00000141944.7;ENSMUST00000143582.7;…	-68;-24;-71;73;-24;-68;-68;-68;-77;-110;-68;52;-68;-68;-68;-68;-68;-110;-249;-68;-68;-68;30260	CGI:chr10:13090532-13091299	Island	0.655732	0.608964	0.56508	0.609926	0.0415898	0.0440117	0.127543	0.071048	0.538878	4.56261	1.0511e-12	9.80597e-10	0.738747	0.633792	0.557432	0.643324	0.0711056	0.0589197	0.178748	0.102924	0.540399	4.17625	5.21434e-06	0.000186359	Common	Yes
cg28188033_BC11	chr10	13090956	13090958	CG	CGI;chr10:13090532-13091299,ImprintDMR;chr10:13089891-13092325;M;DMR_Zac1,TSS;chr10:13090787;Plagl1;ENSMUST00000121646;+169;2,TSS;chr10:13090831;Plagl1;ENSMUST00000121325;+125;2,TSS;chr10:13090834;Plagl1;ENSMUST00000121766;+122;2,TSS;chr10:13091012;Plagl1;ENSMUST00000143582;-56;1	FALSE	+	Plagl1	Plagl1;Plagl1;Plagl1;Plagl1;Plagl1;Plagl1;Plagl1;Plagl1;Plagl1;Plagl1;Plagl1;Plagl1;Plagl1;Plagl1;Plagl1;Plagl1;Plagl1;Plagl1;Plagl1;Plagl1;Plagl1;Plagl1;Plagl1	protein_coding;protein_coding;protein_coding;protein_coding;protein_coding;protein_coding;protein_coding;protein_coding;protein_coding;protein_coding;protein_coding;protein_coding;protein_coding;protein_coding;protein_coding;protein_coding;protein_coding;protein_coding;protein_coding;protein_coding;protein_coding;protein_coding;protein_coding	ENSMUST00000121325.7;ENSMUST00000121646.7;ENSMUST00000121766.7;ENSMUST00000123135.7;ENSMUST00000124252.7;ENSMUST00000126880.7;ENSMUST00000129989.7;ENSMUST00000130449.7;ENSMUST00000130638.7;ENSMUST00000130800.7;ENSMUST00000130894.7;ENSMUST00000135095.7;ENSMUST00000135261.7;ENSMUST00000135826.7;ENSMUST00000138433.7;ENSMUST00000139262.7;ENSMUST00000141068.7;ENSMUST00000141944.7;ENSMUST00000143582.7;…	125;169;122;266;169;125;125;125;116;83;125;245;125;125;125;125;125;83;-56;125;125;125;30453	CGI:chr10:13090532-13091299	Island	0.701319	0.593179	0.561656	0.618718	0.0237209	0.0337859	0.0858032	0.04777	0.570948	5.24916	1.5833e-13	2.00771e-10	0.73542	0.593571	0.538896	0.622629	0.0400497	0.0275472	0.131384	0.066327	0.556302	4.89862	8.41672e-06	0.000220076	Common	Yes
cg28188055_BC21	chr10	13091126	13091128	CG	ImprintDMR;chr10:13089891-13092325;M;DMR_Zac1,TSS;chr10:13091012;Plagl1;ENSMUST00000143582;+114;2	FALSE	-	Plagl1	Plagl1;Plagl1;Plagl1;Plagl1;Plagl1;Plagl1;Plagl1;Plagl1;Plagl1;Plagl1;Plagl1;Plagl1;Plagl1;Plagl1;Plagl1;Plagl1;Plagl1;Plagl1;Plagl1;Plagl1;Plagl1;Plagl1;Plagl1	protein_coding;protein_coding;protein_coding;protein_coding;protein_coding;protein_coding;protein_coding;protein_coding;protein_coding;protein_coding;protein_coding;protein_coding;protein_coding;protein_coding;protein_coding;protein_coding;protein_coding;protein_coding;protein_coding;protein_coding;protein_coding;protein_coding;protein_coding	ENSMUST00000121325.7;ENSMUST00000121646.7;ENSMUST00000121766.7;ENSMUST00000123135.7;ENSMUST00000124252.7;ENSMUST00000126880.7;ENSMUST00000129989.7;ENSMUST00000130449.7;ENSMUST00000130638.7;ENSMUST00000130800.7;ENSMUST00000130894.7;ENSMUST00000135095.7;ENSMUST00000135261.7;ENSMUST00000135826.7;ENSMUST00000138433.7;ENSMUST00000139262.7;ENSMUST00000141068.7;ENSMUST00000141944.7;ENSMUST00000143582.7;…	295;339;292;436;339;295;295;295;286;253;295;415;295;295;295;295;295;253;114;295;295;295;30623	CGI:chr10:13090532-13091299	Island	0.651381	0.560899	0.497396	0.569892	0.0800803	0.0825484	0.119731	0.0941197	0.475772	3.70482	3.72836e-13	4.12685e-10	0.702492	0.594186	0.493535	0.596738	0.099988	0.107478	0.156558	0.121341	0.475397	3.46863	1.14208e-06	0.000134157	Common	Yes
cg28188056_BC21	chr10	13091187	13091189	CG	ImprintDMR;chr10:13089891-13092325;M;DMR_Zac1,MonoallelicMeth	FALSE	+	Plagl1	Plagl1;Plagl1;Plagl1;Plagl1;Plagl1;Plagl1;Plagl1;Plagl1;Plagl1;Plagl1;Plagl1;Plagl1;Plagl1;Plagl1;Plagl1;Plagl1;Plagl1;Plagl1;Plagl1;Plagl1;Plagl1;Plagl1;Plagl1	protein_coding;protein_coding;protein_coding;protein_coding;protein_coding;protein_coding;protein_coding;protein_coding;protein_coding;protein_coding;protein_coding;protein_coding;protein_coding;protein_coding;protein_coding;protein_coding;protein_coding;protein_coding;protein_coding;protein_coding;protein_coding;protein_coding;protein_coding	ENSMUST00000121325.7;ENSMUST00000121646.7;ENSMUST00000121766.7;ENSMUST00000123135.7;ENSMUST00000124252.7;ENSMUST00000126880.7;ENSMUST00000129989.7;ENSMUST00000130449.7;ENSMUST00000130638.7;ENSMUST00000130800.7;ENSMUST00000130894.7;ENSMUST00000135095.7;ENSMUST00000135261.7;ENSMUST00000135826.7;ENSMUST00000138433.7;ENSMUST00000139262.7;ENSMUST00000141068.7;ENSMUST00000141944.7;ENSMUST00000143582.7;…	356;400;353;497;400;356;356;356;347;314;356;476;356;356;356;356;356;314;175;356;356;356;30684	CGI:chr10:13090532-13091299	Island	0.619905	0.539714	0.459538	0.539719	0.0456262	0.046191	0.0858392	0.0592188	0.4805	4.28957	1.00429e-13	1.39542e-10	0.723045	0.572208	0.477085	0.59078	0.0833402	0.0904344	0.118389	0.0973879	0.493392	3.78596	1.03491e-06	0.000132014	Common	Yes
cg28188063_TC21	chr10	13091252	13091254	CG	ImprintDMR;chr10:13089891-13092325;M;DMR_Zac1,MonoallelicMeth	FALSE	-	Plagl1	Plagl1;Plagl1;Plagl1;Plagl1;Plagl1;Plagl1;Plagl1;Plagl1;Plagl1;Plagl1;Plagl1;Plagl1;Plagl1;Plagl1;Plagl1;Plagl1;Plagl1;Plagl1;Plagl1;Plagl1;Plagl1;Plagl1;Plagl1	protein_coding;protein_coding;protein_coding;protein_coding;protein_coding;protein_coding;protein_coding;protein_coding;protein_coding;protein_coding;protein_coding;protein_coding;protein_coding;protein_coding;protein_coding;protein_coding;protein_coding;protein_coding;protein_coding;protein_coding;protein_coding;protein_coding;protein_coding	ENSMUST00000121325.7;ENSMUST00000121646.7;ENSMUST00000121766.7;ENSMUST00000123135.7;ENSMUST00000124252.7;ENSMUST00000126880.7;ENSMUST00000129989.7;ENSMUST00000130449.7;ENSMUST00000130638.7;ENSMUST00000130800.7;ENSMUST00000130894.7;ENSMUST00000135095.7;ENSMUST00000135261.7;ENSMUST00000135826.7;ENSMUST00000138433.7;ENSMUST00000139262.7;ENSMUST00000141068.7;ENSMUST00000141944.7;ENSMUST00000143582.7;…	421;465;418;562;465;421;421;421;412;379;421;541;421;421;421;421;421;379;240;421;421;421;30749	CGI:chr10:13090532-13091299	Island	0.731376	0.676768	0.588321	0.665488	0.0890036	0.102176	0.191509	0.127563	0.537926	3.86497	2.83083e-12	2.08298e-09	0.806648	0.699302	0.608341	0.704764	0.124983	0.150035	0.222161	0.165726	0.539037	3.67705	2.24287e-06	0.00014795	Common	Yes
cg28188064_BC21	chr10	13091266	13091268	CG	ImprintDMR;chr10:13089891-13092325;M;DMR_Zac1,MonoallelicMeth	FALSE	-	Plagl1	Plagl1;Plagl1;Plagl1;Plagl1;Plagl1;Plagl1;Plagl1;Plagl1;Plagl1;Plagl1;Plagl1;Plagl1;Plagl1;Plagl1;Plagl1;Plagl1;Plagl1;Plagl1;Plagl1;Plagl1;Plagl1;Plagl1;Plagl1	protein_coding;protein_coding;protein_coding;protein_coding;protein_coding;protein_coding;protein_coding;protein_coding;protein_coding;protein_coding;protein_coding;protein_coding;protein_coding;protein_coding;protein_coding;protein_coding;protein_coding;protein_coding;protein_coding;protein_coding;protein_coding;protein_coding;protein_coding	ENSMUST00000121325.7;ENSMUST00000121646.7;ENSMUST00000121766.7;ENSMUST00000123135.7;ENSMUST00000124252.7;ENSMUST00000126880.7;ENSMUST00000129989.7;ENSMUST00000130449.7;ENSMUST00000130638.7;ENSMUST00000130800.7;ENSMUST00000130894.7;ENSMUST00000135095.7;ENSMUST00000135261.7;ENSMUST00000135826.7;ENSMUST00000138433.7;ENSMUST00000139262.7;ENSMUST00000141068.7;ENSMUST00000141944.7;ENSMUST00000143582.7;…	435;479;432;576;479;435;435;435;426;393;435;555;435;435;435;435;435;393;254;435;435;435;30763	CGI:chr10:13090532-13091299	Island	0.774279	0.703854	0.609351	0.695828	0.0698319	0.06961	0.14545	0.0949638	0.600864	4.56644	1.9756e-13	2.41152e-10	0.813708	0.691645	0.600281	0.701878	0.093588	0.108919	0.158128	0.120211	0.581667	4.19988	8.15013e-07	0.000128621	Common	Yes
cg28188065_BC21	chr10	13091283	13091285	CG	ImprintDMR;chr10:13089891-13092325;M;DMR_Zac1,MonoallelicMeth	FALSE	-	Plagl1	Plagl1;Plagl1;Plagl1;Plagl1;Plagl1;Plagl1;Plagl1;Plagl1;Plagl1;Plagl1;Plagl1;Plagl1;Plagl1;Plagl1;Plagl1;Plagl1;Plagl1;Plagl1;Plagl1;Plagl1;Plagl1;Plagl1;Plagl1	protein_coding;protein_coding;protein_coding;protein_coding;protein_coding;protein_coding;protein_coding;protein_coding;protein_coding;protein_coding;protein_coding;protein_coding;protein_coding;protein_coding;protein_coding;protein_coding;protein_coding;protein_coding;protein_coding;protein_coding;protein_coding;protein_coding;protein_coding	ENSMUST00000121325.7;ENSMUST00000121646.7;ENSMUST00000121766.7;ENSMUST00000123135.7;ENSMUST00000124252.7;ENSMUST00000126880.7;ENSMUST00000129989.7;ENSMUST00000130449.7;ENSMUST00000130638.7;ENSMUST00000130800.7;ENSMUST00000130894.7;ENSMUST00000135095.7;ENSMUST00000135261.7;ENSMUST00000135826.7;ENSMUST00000138433.7;ENSMUST00000139262.7;ENSMUST00000141068.7;ENSMUST00000141944.7;ENSMUST00000143582.7;…	452;496;449;593;496;452;452;452;443;410;452;572;452;452;452;452;452;410;271;452;452;452;30780	CGI:chr10:13090532-13091299	Island	0.775271	0.670774	0.581964	0.676003	0.0607449	0.0536141	0.125787	0.0800488	0.595954	4.72666	2.96233e-13	3.42397e-10	0.781494	0.644148	0.561527	0.662389	0.0872556	0.0962197	0.150328	0.111268	0.551122	4.05626	1.04883e-06	0.000132228	Common	Yes
cg28188067_BC21	chr10	13091316	13091318	CG	ImprintDMR;chr10:13089891-13092325;M;DMR_Zac1,MonoallelicMeth	FALSE	+	Plagl1	Plagl1;Plagl1;Plagl1;Plagl1;Plagl1;Plagl1;Plagl1;Plagl1;Plagl1;Plagl1;Plagl1;Plagl1;Plagl1;Plagl1;Plagl1;Plagl1;Plagl1;Plagl1;Plagl1;Plagl1;Plagl1;Plagl1;Plagl1	protein_coding;protein_coding;protein_coding;protein_coding;protein_coding;protein_coding;protein_coding;protein_coding;protein_coding;protein_coding;protein_coding;protein_coding;protein_coding;protein_coding;protein_coding;protein_coding;protein_coding;protein_coding;protein_coding;protein_coding;protein_coding;protein_coding;protein_coding	ENSMUST00000121325.7;ENSMUST00000121646.7;ENSMUST00000121766.7;ENSMUST00000123135.7;ENSMUST00000124252.7;ENSMUST00000126880.7;ENSMUST00000129989.7;ENSMUST00000130449.7;ENSMUST00000130638.7;ENSMUST00000130800.7;ENSMUST00000130894.7;ENSMUST00000135095.7;ENSMUST00000135261.7;ENSMUST00000135826.7;ENSMUST00000138433.7;ENSMUST00000139262.7;ENSMUST00000141068.7;ENSMUST00000141944.7;ENSMUST00000143582.7;…	485;529;482;626;529;485;485;485;476;443;485;605;485;485;485;485;485;443;304;485;485;485;30813		Shore	0.661936	0.601499	0.507533	0.590323	0.0375695	0.0428209	0.0552965	0.0452289	0.545094	4.9543	5.70016e-16	2.97798e-12	0.785999	0.630825	0.505912	0.640912	0.0529206	0.0564921	0.0820402	0.0638176	0.577094	4.79716	5.90801e-07	0.000124606	Common	Yes
cg28188068_TC21	chr10	13091360	13091362	CG	ImprintDMR;chr10:13089891-13092325;M;DMR_Zac1,MonoallelicMeth	FALSE	-	Plagl1	Plagl1;Plagl1;Plagl1;Plagl1;Plagl1;Plagl1;Plagl1;Plagl1;Plagl1;Plagl1;Plagl1;Plagl1;Plagl1;Plagl1;Plagl1;Plagl1;Plagl1;Plagl1;Plagl1;Plagl1;Plagl1;Plagl1;Plagl1	protein_coding;protein_coding;protein_coding;protein_coding;protein_coding;protein_coding;protein_coding;protein_coding;protein_coding;protein_coding;protein_coding;protein_coding;protein_coding;protein_coding;protein_coding;protein_coding;protein_coding;protein_coding;protein_coding;protein_coding;protein_coding;protein_coding;protein_coding	ENSMUST00000121325.7;ENSMUST00000121646.7;ENSMUST00000121766.7;ENSMUST00000123135.7;ENSMUST00000124252.7;ENSMUST00000126880.7;ENSMUST00000129989.7;ENSMUST00000130449.7;ENSMUST00000130638.7;ENSMUST00000130800.7;ENSMUST00000130894.7;ENSMUST00000135095.7;ENSMUST00000135261.7;ENSMUST00000135826.7;ENSMUST00000138433.7;ENSMUST00000139262.7;ENSMUST00000141068.7;ENSMUST00000141944.7;ENSMUST00000143582.7;…	529;573;526;670;573;529;529;529;520;487;529;649;529;529;529;529;529;487;348;529;529;529;30857		Shore	0.630088	0.614329	0.521451	0.588623	0.0528821	0.0497727	0.0863156	0.0629902	0.525633	4.46181	7.49319e-15	1.90035e-11	0.824478	0.712278	0.608361	0.715039	0.0842552	0.0923627	0.15326	0.109959	0.605079	4.45992	8.20041e-07	0.000128621	Common	Yes
cg28188072_BC21	chr10	13091498	13091500	CG	Enhancer,ImprintDMR;chr10:13089891-13092325;M;DMR_Zac1,MonoallelicMeth,VMR;chr10:13091182-13091534	FALSE	+	Plagl1	Plagl1;Plagl1;Plagl1;Plagl1;Plagl1;Plagl1;Plagl1;Plagl1;Plagl1;Plagl1;Plagl1;Plagl1;Plagl1;Plagl1;Plagl1;Plagl1;Plagl1;Plagl1;Plagl1;Plagl1;Plagl1;Plagl1;Plagl1	protein_coding;protein_coding;protein_coding;protein_coding;protein_coding;protein_coding;protein_coding;protein_coding;protein_coding;protein_coding;protein_coding;protein_coding;protein_coding;protein_coding;protein_coding;protein_coding;protein_coding;protein_coding;protein_coding;protein_coding;protein_coding;protein_coding;protein_coding	ENSMUST00000121325.7;ENSMUST00000121646.7;ENSMUST00000121766.7;ENSMUST00000123135.7;ENSMUST00000124252.7;ENSMUST00000126880.7;ENSMUST00000129989.7;ENSMUST00000130449.7;ENSMUST00000130638.7;ENSMUST00000130800.7;ENSMUST00000130894.7;ENSMUST00000135095.7;ENSMUST00000135261.7;ENSMUST00000135826.7;ENSMUST00000138433.7;ENSMUST00000139262.7;ENSMUST00000141068.7;ENSMUST00000141944.7;ENSMUST00000143582.7;…	667;711;664;808;711;667;667;667;658;625;667;787;667;667;667;667;667;625;486;667;667;667;30995		Shore	0.789723	0.671741	0.601376	0.687613	0.0821221	0.070442	0.14538	0.0993147	0.588299	4.43177	4.73333e-13	5.08822e-10	0.843844	0.743239	0.659737	0.74894	0.128016	0.143409	0.187641	0.153022	0.595918	4.12774	4.67269e-07	0.000122103	Common	Yes
cg28188073_TC21	chr10	13091502	13091504	CG	ImprintDMR;chr10:13089891-13092325;M;DMR_Zac1,MonoallelicMeth	FALSE	-	Plagl1	Plagl1;Plagl1;Plagl1;Plagl1;Plagl1;Plagl1;Plagl1;Plagl1;Plagl1;Plagl1;Plagl1;Plagl1;Plagl1;Plagl1;Plagl1;Plagl1;Plagl1;Plagl1;Plagl1;Plagl1;Plagl1;Plagl1;Plagl1	protein_coding;protein_coding;protein_coding;protein_coding;protein_coding;protein_coding;protein_coding;protein_coding;protein_coding;protein_coding;protein_coding;protein_coding;protein_coding;protein_coding;protein_coding;protein_coding;protein_coding;protein_coding;protein_coding;protein_coding;protein_coding;protein_coding;protein_coding	ENSMUST00000121325.7;ENSMUST00000121646.7;ENSMUST00000121766.7;ENSMUST00000123135.7;ENSMUST00000124252.7;ENSMUST00000126880.7;ENSMUST00000129989.7;ENSMUST00000130449.7;ENSMUST00000130638.7;ENSMUST00000130800.7;ENSMUST00000130894.7;ENSMUST00000135095.7;ENSMUST00000135261.7;ENSMUST00000135826.7;ENSMUST00000138433.7;ENSMUST00000139262.7;ENSMUST00000141068.7;ENSMUST00000141944.7;ENSMUST00000143582.7;…	671;715;668;812;715;671;671;671;662;629;671;791;671;671;671;671;671;629;490;671;671;671;30999		Shore	0.717939	0.656942	0.559662	0.644848	0.122686	0.126481	0.188585	0.145917	0.49893	3.45413	3.27357e-12	2.30979e-09	0.807496	0.710952	0.623639	0.714029	0.201799	0.221281	0.237347	0.220142	0.493886	3.19289	1.2238e-06	0.000135749	Common	Yes
cg28188083_BC21	chr10	13091759	13091761	CG	ImprintDMR;chr10:13089891-13092325;M;DMR_Zac1	FALSE	-	Gm27741;Plagl1	Gm27741;Plagl1;Plagl1;Plagl1;Plagl1;Plagl1;Plagl1;Plagl1;Plagl1;Plagl1;Plagl1;Plagl1;Plagl1;Plagl1;Plagl1;Plagl1;Plagl1;Plagl1;Plagl1;Plagl1;Plagl1;Plagl1;Plagl1;Plagl1	misc_RNA;protein_coding;protein_coding;protein_coding;protein_coding;protein_coding;protein_coding;protein_coding;protein_coding;protein_coding;protein_coding;protein_coding;protein_coding;protein_coding;protein_coding;protein_coding;protein_coding;protein_coding;protein_coding;protein_coding;protein_coding;protein_coding;protein_coding;protein_coding	ENSMUST00000185060.1;ENSMUST00000121325.7;ENSMUST00000121646.7;ENSMUST00000121766.7;ENSMUST00000123135.7;ENSMUST00000124252.7;ENSMUST00000126880.7;ENSMUST00000129989.7;ENSMUST00000130449.7;ENSMUST00000130638.7;ENSMUST00000130800.7;ENSMUST00000130894.7;ENSMUST00000135095.7;ENSMUST00000135261.7;ENSMUST00000135826.7;ENSMUST00000138433.7;ENSMUST00000139262.7;ENSMUST00000141068.7;ENSMUST00000141944.7;…	58;928;972;925;1069;972;928;928;928;919;886;928;1048;928;928;928;928;928;886;747;928;928;928;31256		Shore	0.54068	0.528535	0.445024	0.504746	0.0726801	0.0667614	0.102695	0.0807123	0.424034	3.56247	2.34838e-13	2.76325e-10	0.682937	0.61444	0.538492	0.611956	0.0963584	0.111781	0.119944	0.109361	0.502595	3.69887	2.77756e-08	4.35408e-05	Common	No
cg28188084_TC21	chr10	13091806	13091808	CG	ImprintDMR;chr10:13089891-13092325;M;DMR_Zac1,MonoallelicMeth	FALSE	+	Gm27741;Plagl1	Gm27741;Plagl1;Plagl1;Plagl1;Plagl1;Plagl1;Plagl1;Plagl1;Plagl1;Plagl1;Plagl1;Plagl1;Plagl1;Plagl1;Plagl1;Plagl1;Plagl1;Plagl1;Plagl1;Plagl1;Plagl1;Plagl1;Plagl1;Plagl1	misc_RNA;protein_coding;protein_coding;protein_coding;protein_coding;protein_coding;protein_coding;protein_coding;protein_coding;protein_coding;protein_coding;protein_coding;protein_coding;protein_coding;protein_coding;protein_coding;protein_coding;protein_coding;protein_coding;protein_coding;protein_coding;protein_coding;protein_coding;protein_coding	ENSMUST00000185060.1;ENSMUST00000121325.7;ENSMUST00000121646.7;ENSMUST00000121766.7;ENSMUST00000123135.7;ENSMUST00000124252.7;ENSMUST00000126880.7;ENSMUST00000129989.7;ENSMUST00000130449.7;ENSMUST00000130638.7;ENSMUST00000130800.7;ENSMUST00000130894.7;ENSMUST00000135095.7;ENSMUST00000135261.7;ENSMUST00000135826.7;ENSMUST00000138433.7;ENSMUST00000139262.7;ENSMUST00000141068.7;ENSMUST00000141944.7;…	11;975;1019;972;1116;1019;975;975;975;966;933;975;1095;975;975;975;975;975;933;794;975;975;975;31303		Shore	0.734599	0.755888	0.620283	0.70359	0.330448	0.304378	0.483244	0.37269	0.3309	2.03845	1.93316e-07	2.46362e-06	0.839082	0.797997	0.721765	0.786281	0.433165	0.499673	0.441654	0.458164	0.328117	2.15595	7.40128e-06	0.000209644	WTvsKO_0h	No
cg28188086_BC21	chr10	13091864	13091866	CG	ImprintDMR;chr10:13089891-13092325;M;DMR_Zac1,MonoallelicMeth	FALSE	-	Gm27741;Plagl1	Gm27741;Plagl1;Plagl1;Plagl1;Plagl1;Plagl1;Plagl1;Plagl1;Plagl1;Plagl1;Plagl1;Plagl1;Plagl1;Plagl1;Plagl1;Plagl1;Plagl1;Plagl1;Plagl1;Plagl1;Plagl1;Plagl1;Plagl1;Plagl1	misc_RNA;protein_coding;protein_coding;protein_coding;protein_coding;protein_coding;protein_coding;protein_coding;protein_coding;protein_coding;protein_coding;protein_coding;protein_coding;protein_coding;protein_coding;protein_coding;protein_coding;protein_coding;protein_coding;protein_coding;protein_coding;protein_coding;protein_coding;protein_coding	ENSMUST00000185060.1;ENSMUST00000121325.7;ENSMUST00000121646.7;ENSMUST00000121766.7;ENSMUST00000123135.7;ENSMUST00000124252.7;ENSMUST00000126880.7;ENSMUST00000129989.7;ENSMUST00000130449.7;ENSMUST00000130638.7;ENSMUST00000130800.7;ENSMUST00000130894.7;ENSMUST00000135095.7;ENSMUST00000135261.7;ENSMUST00000135826.7;ENSMUST00000138433.7;ENSMUST00000139262.7;ENSMUST00000141068.7;ENSMUST00000141944.7;…	-47;1033;1077;1030;1174;1077;1033;1033;1033;1024;991;1033;1153;1033;1033;1033;1033;1033;991;852;1033;1033;1033;31361		Shore	0.683915	0.663761	0.596282	0.647986	0.131134	0.104252	0.204561	0.146649	0.501337	3.48255	2.80978e-12	2.07335e-09	0.831198	0.816971	0.709091	0.785753	0.309401	0.267734	0.395593	0.324243	0.461511	2.98831	2.30771e-06	0.000149457	Common	No
cg28188096_BC21	chr10	13092323	13092325	CG	ImprintDMR;chr10:13089891-13092325;M;DMR_Zac1,MonoallelicMeth	FALSE	+	Gm27741;Plagl1	Gm27741;Plagl1;Plagl1;Plagl1;Plagl1;Plagl1;Plagl1;Plagl1;Plagl1;Plagl1;Plagl1;Plagl1;Plagl1;Plagl1;Plagl1;Plagl1;Plagl1;Plagl1;Plagl1;Plagl1;Plagl1;Plagl1;Plagl1;Plagl1	misc_RNA;protein_coding;protein_coding;protein_coding;protein_coding;protein_coding;protein_coding;protein_coding;protein_coding;protein_coding;protein_coding;protein_coding;protein_coding;protein_coding;protein_coding;protein_coding;protein_coding;protein_coding;protein_coding;protein_coding;protein_coding;protein_coding;protein_coding;protein_coding	ENSMUST00000185060.1;ENSMUST00000121325.7;ENSMUST00000121646.7;ENSMUST00000121766.7;ENSMUST00000123135.7;ENSMUST00000124252.7;ENSMUST00000126880.7;ENSMUST00000129989.7;ENSMUST00000130449.7;ENSMUST00000130638.7;ENSMUST00000130800.7;ENSMUST00000130894.7;ENSMUST00000135095.7;ENSMUST00000135261.7;ENSMUST00000135826.7;ENSMUST00000138433.7;ENSMUST00000139262.7;ENSMUST00000141068.7;ENSMUST00000141944.7;…	-506;1492;1536;1489;1633;1536;1492;1492;1492;1483;1450;1492;1612;1492;1492;1492;1492;1492;1450;1311;1492;1492;1492;31820		Shore	0.839582	0.819613	0.750079	0.803091	0.441425	0.422354	0.54745	0.47041	0.332681	2.22464	6.31222e-09	2.5216e-07	0.874889	0.876562	0.861567	0.871006	0.727995	0.730932	0.732365	0.730431	0.140576	1.31913	1.87709e-06	0.000142597	WTvsKO_0h	No
cg28193183_BC21	chr10	13616206	13616208	CG	MonoallelicMeth	FALSE	-								0.505576	0.565584	0.499078	0.523413	0.177829	0.176959	0.220095	0.191628	0.331785	2.21973	6.47801e-10	6.52092e-08	0.697703	0.711751	0.71067	0.706708	0.513987	0.455646	0.482157	0.48393	0.222778	1.36202	2.99169e-06	0.000159631	WTvsKO_0h	No
cg28202895_TC11	chr10	14772169	14772171	CG	lincRNATSS;chr10:14771940;Gm47698;ENSMUST00000220206;230	FALSE	-	Gm47698	Gm47698	lincRNA	ENSMUST00000220206.1	230			0.684091	0.801577	0.738167	0.741279	0.330841	0.276063	0.403495	0.3368	0.404479	2.53177	9.09054e-10	7.88761e-08	0.888877	0.916765	0.916151	0.907264	0.773479	0.754428	0.780875	0.769594	0.13767	1.56218	3.77602e-06	0.000170504	WTvsKO_0h	No
cg28204675_BC11	chr10	15136540	15136542	CG	PseudogeneTSS;chr10:15135903;Gm47703;ENSMUST00000218676;638	FALSE	+								0.69546	0.758785	0.705547	0.719931	0.319038	0.214722	0.379464	0.304408	0.415523	2.59318	7.93684e-10	7.31306e-08	0.843484	0.860376	0.860232	0.854698	0.767694	0.691372	0.667575	0.70888	0.145817	1.26039	8.86626e-05	0.000698466	WTvsKO_0h	No
cg28211096_BC11	chr10	16583509	16583511	CG	lincRNATSS;chr10:16584268;Gm47729;ENSMUST00000217766;757	FALSE	+	Gm47729	Gm47729	lincRNA	ENSMUST00000217766.1	-758			0.39916	0.543637	0.480181	0.474326	0.119188	0.110538	0.174826	0.13485	0.339476	2.56027	5.88149e-10	6.15819e-08	0.693617	0.758752	0.755083	0.735817	0.514895	0.488921	0.52258	0.508798	0.227019	1.43461	7.6731e-06	0.000212507	WTvsKO_0h	No
cg28211099_TC11	chr10	16584480	16584482	CG	lincRNATSS;chr10:16584268;Gm47729;ENSMUST00000217766;213	FALSE	-	Gm47729	Gm47729	lincRNA	ENSMUST00000217766.1	213			0.640658	0.726556	0.672089	0.679768	0.288742	0.268441	0.346546	0.301243	0.378525	2.31379	6.19242e-10	6.34593e-08	0.850428	0.858378	0.834627	0.847811	0.710838	0.6773	0.673471	0.687203	0.160608	1.34356	4.07444e-06	0.000173654	WTvsKO_0h	No
cg28211846_BC21	chr10	16768897	16768899	CG	PseudogeneTSS;chr10:16768940;Gm5948;ENSMUST00000219627;41	FALSE	+	Gm5948	Gm5948	processed_pseudogene	ENSMUST00000219627.1	-42			0.713682	0.743633	0.710113	0.722476	0.383845	0.334227	0.455845	0.391306	0.33117	2.02635	6.62586e-09	2.60428e-07	0.842088	0.860729	0.877454	0.86009	0.74965	0.713429	0.753239	0.738773	0.121318	1.12479	4.4589e-05	0.000475701	WTvsKO_0h	No
cg28211964_BC21	chr10	16786475	16786477	CG	PseudogeneTSS;chr10:16786461;Gm18039;ENSMUST00000217816;15	FALSE	-	Gm18039	Gm18039	processed_pseudogene	ENSMUST00000217816.1	-14			0.669974	0.751035	0.690203	0.703738	0.320238	0.262173	0.434453	0.338955	0.364783	2.24309	1.05021e-08	3.48074e-07	0.834339	0.855618	0.852326	0.847428	0.763652	0.706911	0.750047	0.740203	0.107224	0.960317	0.000127639	0.00086409	WTvsKO_0h	No
cg28212385_BC11	chr10	16892706	16892708	CG	Random	FALSE	+								0.628158	0.762277	0.730619	0.707018	0.332717	0.309326	0.428248	0.356764	0.350254	2.15225	1.8054e-08	4.93567e-07	0.876545	0.867701	0.885135	0.876461	0.809795	0.748108	0.803073	0.786992	0.089469	0.932969	0.000300694	0.00147313	WTvsKO_0h	No
cg28212472_TC21	chr10	16908722	16908724	CG	Adenoma	FALSE	+	Gm20125	Gm20125	processed_transcript	ENSMUST00000207720.1	186886			0.459849	0.565989	0.513195	0.513011	0.170914	0.121394	0.254857	0.182388	0.330623	2.30287	1.60403e-08	4.5797e-07	0.789415	0.793002	0.798543	0.793653	0.626019	0.55488	0.657286	0.612728	0.180925	1.27675	3.18597e-05	0.000398272	WTvsKO_0h	No
cg28222327_TC11	chr10	18214146	18214148	CG	Random	FALSE	+	Ccdc28a	Ccdc28a;Ccdc28a;Ccdc28a;Ccdc28a;Ccdc28a	protein_coding;protein_coding;protein_coding;protein_coding;protein_coding	ENSMUST00000080860.12;ENSMUST00000173243.7;ENSMUST00000173962.1;ENSMUST00000174592.7;ENSMUST00000174631.1	20850;20852;5468;13327;2189			0.387873	0.599783	0.50127	0.496308	0.354632	0.180282	0.233119	0.256011	0.240297	1.56645	3.08681e-05	0.000107877	0.888369	0.922017	0.908302	0.90623	0.683	0.582137	0.450788	0.571975	0.334254	2.85446	6.04427e-06	0.000195406	WTvsKO_96h	No
cg28234509_TC11	chr10	19598222	19598224	CG	GeneBody;Ifngr1;NM_010511;inside_[intron_between_exon_2_and_3];splice=0	FALSE	+	Ifngr1	Ifngr1;Ifngr1;Ifngr1;Ifngr1	protein_coding;protein_coding;protein_coding;protein_coding	ENSMUST00000020188.12;ENSMUST00000164591.2;ENSMUST00000171772.1;ENSMUST00000172253.1	6274;6150;6170;6161			0.183353	0.311545	0.326074	0.273657	0.147424	0.144007	0.0746253	0.122019	0.151639	1.46307	5.42626e-05	0.000168434	0.564604	0.524008	0.592829	0.56048	0.255047	0.251063	0.174721	0.226944	0.333536	2.13951	2.11016e-06	0.000146278	WTvsKO_96h	No
cg28242441_TC11	chr10	20311223	20311225	CG	Enhancer	FALSE	-	4933406P04Rik;Bclaf1	4933406P04Rik;Bclaf1;Bclaf1;Bclaf1;Bclaf1;Bclaf1;Bclaf1;Bclaf1	lincRNA;protein_coding;protein_coding;protein_coding;protein_coding;protein_coding;protein_coding;protein_coding	ENSMUST00000092680.2;ENSMUST00000043881.11;ENSMUST00000092678.9;ENSMUST00000185800.6;ENSMUST00000186100.6;ENSMUST00000187338.6;ENSMUST00000190156.6;ENSMUST00000216560.1	1071;-1260;-1245;-1313;-1248;-1304;-1305;-1308		Shore	0.513701	0.601639	0.583164	0.566168	0.231319	0.177658	0.206846	0.205274	0.360894	2.34684	3.42574e-10	4.55868e-08	0.707931	0.782026	0.749454	0.74647	0.571996	0.536035	0.546076	0.551369	0.195101	1.26926	2.67624e-05	0.000365727	WTvsKO_0h	No
cg28266667_TC21	chr10	22823290	22823292	CG	Enhancer	FALSE	+	Gm10824	Gm10824	antisense	ENSMUST00000220000.1	7542		Shelf	0.607848	0.642631	0.578338	0.609606	0.265263	0.223655	0.284764	0.257894	0.351712	2.17619	9.37831e-10	8.04336e-08	0.789344	0.793149	0.752375	0.778289	0.618535	0.557655	0.570393	0.582194	0.196095	1.33587	1.08817e-05	0.000243972	WTvsKO_0h	No
cg28267464_TC11	chr10	22916249	22916251	CG	Adenoma	FALSE	+								0.615034	0.783107	0.72773	0.708624	0.265471	0.204329	0.371946	0.280582	0.428042	2.71062	3.31205e-09	1.6855e-07	0.901278	0.896317	0.897549	0.898381	0.790303	0.735076	0.757757	0.761046	0.137336	1.46723	2.9255e-06	0.000158493	WTvsKO_0h	No
cg28288168_TC21	chr10	25275520	25275522	CG	Enhancer	FALSE	-	Akap7	Akap7;Akap7	protein_coding;protein_coding	ENSMUST00000041984.13;ENSMUST00000176258.7	23644;20580			0.560327	0.62311	0.582327	0.588588	0.272047	0.203176	0.250123	0.241782	0.346806	2.17672	1.18626e-09	9.17331e-08	0.792998	0.810269	0.813821	0.805696	0.67872	0.584755	0.491132	0.584869	0.220827	1.54616	0.000139795	0.000913283	WTvsKO_0h	No
cg28291443_BC11	chr10	25604543	25604545	CG	Adenoma	FALSE	-	Gm29571	Gm29571	antisense	ENSMUST00000191547.1	68158			0.553729	0.665027	0.614826	0.611194	0.31181	0.203076	0.318623	0.277836	0.333358	2.06215	3.09388e-08	7.05127e-07	0.818621	0.837412	0.824292	0.826775	0.678289	0.597795	0.644396	0.64016	0.186615	1.42112	6.93423e-06	0.000204594	WTvsKO_0h	No
cg28298511_TC21	chr10	26549307	26549309	CG	Adenoma	FALSE	-								0.579027	0.592806	0.570542	0.580792	0.244548	0.187978	0.284832	0.23912	0.341672	2.1593	2.21634e-09	1.3206e-07	0.778994	0.791507	0.761369	0.77729	0.635764	0.5857	0.613645	0.611703	0.165588	1.14846	1.58287e-05	0.000285545	WTvsKO_0h	No
cg28319133_BC21	chr10	30199200	30199202	CG	Random	FALSE	-	Cenpw	Cenpw;Cenpw	protein_coding;protein_coding	ENSMUST00000099985.5;ENSMUST00000216853.1	1360;1292		Shore	0.439245	0.481504	0.487698	0.469482	0.0966883	0.0973358	0.114716	0.102913	0.366569	2.95163	1.34522e-12	1.20755e-09	0.737317	0.733242	0.818507	0.763022	0.441053	0.420199	0.479158	0.446803	0.316219	2.0158	3.45333e-06	0.000165911	WTvsKO_0h	No
cg28324334_BC11	chr10	31028591	31028593	CG	EnhancerVista;chr10:31027819-31028728	FALSE	+	Gm30676	Gm30676;Gm30676	lincRNA;lincRNA	ENSMUST00000214000.1;ENSMUST00000214464.1	37643;37653			0.581209	0.6872	0.625491	0.6313	0.299386	0.228728	0.292401	0.273505	0.357795	2.20117	2.25281e-09	1.33442e-07	0.802095	0.837349	0.837015	0.825487	0.663821	0.613464	0.632045	0.636443	0.189043	1.43837	5.01196e-06	0.000183455	WTvsKO_0h	No
cg28328483_TC21	chr10	31737781	31737783	CG	PMDsoloWCGW	FALSE	+	Nkain2	Nkain2;Nkain2	protein_coding;protein_coding	ENSMUST00000191234.6;ENSMUST00000218645.1	1152680;1151915			0.520959	0.628015	0.528328	0.559101	0.208871	0.176581	0.248896	0.21145	0.347651	2.25876	1.86489e-09	1.18903e-07	0.721861	0.756775	0.771598	0.750078	0.607124	0.605485	0.592917	0.601842	0.148236	0.993774	5.23064e-05	0.000517811	WTvsKO_0h	No
cg28329057_BC21	chr10	31856910	31856912	CG	PMDsoloWCGW	FALSE	+	Nkain2	Nkain2;Nkain2	protein_coding;protein_coding	ENSMUST00000191234.6;ENSMUST00000218645.1	1033551;1032786			0.622788	0.684512	0.599135	0.635478	0.29755	0.253827	0.334594	0.295324	0.340154	2.06912	4.64794e-09	2.07341e-07	0.749464	0.775289	0.765101	0.763285	0.682748	0.707621	0.706774	0.699047	0.0642371	0.473673	0.00514488	0.0104173	WTvsKO_0h	No
cg28332826_TC11	chr10	32773851	32773853	CG	Adenoma	FALSE	+	Nkain2	Nkain2;Nkain2;Nkain2;Nkain2	protein_coding;protein_coding;protein_coding;protein_coding	ENSMUST00000191234.6;ENSMUST00000218645.1;ENSMUST00000219125.1;ENSMUST00000219306.1	116610;115845;115997;116610			0.504146	0.672109	0.560896	0.57905	0.218655	0.157269	0.240162	0.205362	0.373688	2.44447	2.6105e-09	1.4547e-07	0.829454	0.837468	0.81424	0.827054	0.746238	0.661668	0.638809	0.682238	0.144816	1.14429	0.000213874	0.00118556	WTvsKO_0h	No
cg28332921_BC21	chr10	32791250	32791252	CG	PMDsoloWCGW	FALSE	+	Nkain2	Nkain2;Nkain2;Nkain2;Nkain2	protein_coding;protein_coding;protein_coding;protein_coding	ENSMUST00000191234.6;ENSMUST00000218645.1;ENSMUST00000219125.1;ENSMUST00000219306.1	99211;98446;98598;99211			0.598771	0.680184	0.635841	0.638265	0.266852	0.211618	0.353218	0.277229	0.361036	2.23286	6.06982e-09	2.45867e-07	0.806123	0.806871	0.830643	0.814546	0.740971	0.701228	0.75613	0.732776	0.0817694	0.67771	0.00143527	0.00415757	WTvsKO_0h	No
cg28333022_BC21	chr10	32815674	32815676	CG	PMDsoloWCGW	FALSE	+	Nkain2	Nkain2;Nkain2;Nkain2;Nkain2	protein_coding;protein_coding;protein_coding;protein_coding	ENSMUST00000191234.6;ENSMUST00000218645.1;ENSMUST00000219125.1;ENSMUST00000219306.1	74787;74022;74174;74787			0.553867	0.628814	0.548741	0.57714	0.208404	0.196593	0.277975	0.227657	0.349483	2.22937	1.76649e-09	1.15331e-07	0.78637	0.772444	0.813336	0.790717	0.608271	0.578139	0.626541	0.604317	0.1864	1.31025	8.53596e-06	0.000221126	WTvsKO_0h	No
cg28336320_BC11	chr10	33580576	33580578	CG	Random	FALSE	-	Clvs2	Clvs2;Clvs2	protein_coding;protein_coding	ENSMUST00000019920.12;ENSMUST00000159533.8	44193;43620			0.689887	0.828011	0.729877	0.749258	0.414224	0.351784	0.415533	0.393847	0.355411	2.24294	8.89778e-09	3.13244e-07	0.871893	0.875475	0.872686	0.873351	0.816809	0.773947	0.718041	0.769599	0.103752	1.02556	0.00046938	0.00196587	WTvsKO_0h	No
cg28340551_TC11	chr10	34231032	34231034	CG	Random	FALSE	+	Gm26564	Gm26564	lincRNA	ENSMUST00000216701.1	2499			0.232764	0.354523	0.354908	0.314065	0.164987	0.123919	0.13485	0.141252	0.172813	1.46512	4.51538e-06	2.46151e-05	0.762169	0.73661	0.828606	0.775795	0.456444	0.466721	0.335044	0.419403	0.356392	2.29016	8.37237e-06	0.000219647	WTvsKO_96h	No
cg28340559_TC11	chr10	34232931	34232933	CG	lincRNATSS;chr10:34233531;Gm26564;ENSMUST00000216701;598	FALSE	-	Gm26564	Gm26564	lincRNA	ENSMUST00000216701.1	600			0.0655504	0.147536	0.144507	0.119198	0.038105	0.044095	0.0389134	0.0403712	0.0788268	1.59757	6.60811e-06	3.28705e-05	0.475592	0.430498	0.509795	0.471961	0.16494	0.151046	0.0921167	0.136035	0.335927	2.54782	2.19961e-06	0.000147565	WTvsKO_96h	No
cg28340560_TC11	chr10	34233244	34233246	CG	lincRNATSS;chr10:34233531;Gm26564;ENSMUST00000216701;285	FALSE	+	Gm26564	Gm26564	lincRNA	ENSMUST00000216701.1	287			0.131424	0.227947	0.24675	0.20204	0.0554917	0.0579839	0.0458535	0.0531097	0.14893	2.13195	2.46336e-08	6.06633e-07	0.652288	0.611644	0.705846	0.656593	0.346399	0.313392	0.19968	0.28649	0.370103	2.29203	1.36115e-05	0.000267677	WTvsKO_96h	No
cg28342808_TC21	chr10	34579128	34579130	CG	Adenoma	FALSE	-	Frk	Frk;Frk;Frk	protein_coding;protein_coding;protein_coding	ENSMUST00000019913.14;ENSMUST00000170771.2;ENSMUST00000215594.1	95730;95609;95597			0.652803	0.69643	0.674571	0.674601	0.339472	0.293932	0.360293	0.331232	0.343369	2.07112	1.74558e-09	1.14631e-07	0.805667	0.768503	0.825097	0.799755	0.736854	0.706221	0.713077	0.718717	0.0810381	0.652138	0.00259275	0.00630537	WTvsKO_0h	No
cg28368712_BC11	chr10	39525586	39525588	CG	Enhancer	FALSE	+	Fyn	Fyn;Fyn;Fyn;Fyn;Fyn;Fyn	protein_coding;protein_coding;protein_coding;protein_coding;protein_coding;protein_coding	ENSMUST00000063091.12;ENSMUST00000099967.9;ENSMUST00000126486.7;ENSMUST00000135242.7;ENSMUST00000136659.1;ENSMUST00000146287.7	155823;155789;155784;70782;13848;70672			0.198655	0.34268	0.344983	0.295439	0.104053	0.0855517	0.0764027	0.0886693	0.20677	2.08093	5.36167e-08	1.01945e-06	0.717098	0.689611	0.750818	0.719176	0.446227	0.387552	0.174074	0.335951	0.383225	2.43429	0.000231233	0.00124688	WTvsKO_96h	No
cg28368802_BC11	chr10	39532148	39532150	CG	CTCF,Enhancer	FALSE	-	Fyn	Fyn;Fyn;Fyn;Fyn;Fyn;Fyn;Fyn	protein_coding;protein_coding;protein_coding;protein_coding;protein_coding;protein_coding;protein_coding	ENSMUST00000063091.12;ENSMUST00000099967.9;ENSMUST00000123205.1;ENSMUST00000126486.7;ENSMUST00000135242.7;ENSMUST00000136659.1;ENSMUST00000146287.7	162385;162351;-1121;162346;77344;20410;77234			0.330226	0.511148	0.493029	0.444801	0.190042	0.136549	0.0977455	0.141446	0.303355	2.32085	3.65902e-08	7.89336e-07	0.818924	0.788704	0.844141	0.817256	0.632701	0.562348	0.218655	0.471234	0.346022	2.40188	0.00187013	0.00500117	WTvsKO_96h	No
cg28368803_BC11	chr10	39532172	39532174	CG	Random	FALSE	+	Fyn	Fyn;Fyn;Fyn;Fyn;Fyn;Fyn;Fyn	protein_coding;protein_coding;protein_coding;protein_coding;protein_coding;protein_coding;protein_coding	ENSMUST00000063091.12;ENSMUST00000099967.9;ENSMUST00000123205.1;ENSMUST00000126486.7;ENSMUST00000135242.7;ENSMUST00000136659.1;ENSMUST00000146287.7	162409;162375;-1097;162370;77368;20434;77258			0.397405	0.585929	0.551069	0.511467	0.2696	0.173434	0.0918939	0.178309	0.333158	2.39714	3.44058e-07	3.72754e-06	0.864254	0.813996	0.882297	0.853516	0.680929	0.647842	0.266865	0.531879	0.321637	2.39709	0.00221424	0.00563011	WTvsKO_0h	No
cg28373786_TC11	chr10	40059178	40059180	CG	Enhancer	FALSE	-	Slc16a10	Slc16a10;Slc16a10	protein_coding;protein_coding	ENSMUST00000092566.7;ENSMUST00000213827.1	83076;17427			0.611745	0.702592	0.645769	0.653369	0.291235	0.232195	0.251584	0.258338	0.395031	2.44794	1.65844e-10	3.03373e-08	0.797191	0.820198	0.83509	0.817493	0.699313	0.683227	0.527564	0.636702	0.180791	1.3396	0.000568015	0.00222684	WTvsKO_0h	No
cg28379743_TC11	chr10	40639696	40639698	CG	Enhancer	FALSE	-	Ddo	Ddo;Ddo;Ddo;Ddo;Ddo;Ddo	protein_coding;protein_coding;protein_coding;protein_coding;protein_coding;protein_coding	ENSMUST00000019977.7;ENSMUST00000213442.1;ENSMUST00000213503.1;ENSMUST00000213856.1;ENSMUST00000214102.1;ENSMUST00000216830.1	9686;9651;9673;9654;9677;9620			0.116904	0.293732	0.285992	0.232209	0.0950302	0.0719755	0.0551871	0.0740643	0.158145	1.8449	8.74334e-06	4.06878e-05	0.775683	0.750128	0.822321	0.782711	0.54746	0.479563	0.280308	0.435777	0.346934	2.26332	0.000147386	0.0009432	WTvsKO_96h	No
cg28382251_BC21	chr10	40885559	40885561	CG	Enhancer	FALSE	+	Wasf1	Wasf1;Wasf1	protein_coding;protein_coding	ENSMUST00000019975.13;ENSMUST00000105509.1	2085;1733		Shore	0.489838	0.617044	0.549952	0.552278	0.157361	0.157447	0.254325	0.189711	0.362567	2.43713	2.0962e-09	1.27817e-07	0.779894	0.773388	0.827489	0.79359	0.679032	0.65686	0.626592	0.654161	0.139429	1.03116	0.00016221	0.000999611	WTvsKO_0h	No
cg28387916_BC11	chr10	41451517	41451519	CG	VMR;chr10:41451286-41451553	FALSE	+	Zbtb24	Zbtb24;Zbtb24;Zbtb24	protein_coding;protein_coding;protein_coding	ENSMUST00000080771.9;ENSMUST00000213797.1;ENSMUST00000216656.1	1135;1091;1083		Shore	0.524668	0.68555	0.649929	0.620049	0.246458	0.235131	0.328232	0.26994	0.350109	2.16896	1.73621e-08	4.81557e-07	0.862119	0.854774	0.885699	0.867531	0.628634	0.636133	0.677276	0.647348	0.220183	1.84031	7.22222e-07	0.000127645	WTvsKO_0h	No
cg28396517_TC11	chr10	42197270	42197272	CG	CGI;chr10:42196982-42197868,Enhancer	FALSE	+	Foxo3	Foxo3;Foxo3;Foxo3	protein_coding;protein_coding;protein_coding	ENSMUST00000056974.3;ENSMUST00000105502.7;ENSMUST00000175881.7	79472;79482;79426	CGI:chr10:42196982-42197868	Island	0.276155	0.399457	0.422399	0.366004	0.183945	0.159612	0.181257	0.174938	0.191066	1.43045	5.08383e-06	2.69293e-05	0.762228	0.668992	0.775177	0.735465	0.409824	0.385268	0.417071	0.404055	0.331411	2.05492	2.56712e-06	0.000153451	WTvsKO_96h	No
cg28396525_TC11	chr10	42197357	42197359	CG	EPIC;cg15944966	FALSE	+	Foxo3	Foxo3;Foxo3;Foxo3	protein_coding;protein_coding;protein_coding	ENSMUST00000056974.3;ENSMUST00000105502.7;ENSMUST00000175881.7	79385;79395;79339	CGI:chr10:42196982-42197868	Island	0.100294	0.242554	0.277718	0.206855	0.0309112	0.0192806	0.0186276	0.0229398	0.183916	3.39045	4.79038e-10	5.50522e-08	0.671461	0.536671	0.680801	0.629645	0.18928	0.136506	0.167175	0.16432	0.465324	3.13753	3.69092e-07	0.000118874	WTvsKO_96h	No
cg28397280_BC21	chr10	42247745	42247747	CG	Enhancer	FALSE	-	Foxo3	Foxo3;Foxo3;Foxo3;Foxo3;Foxo3	protein_coding;protein_coding;protein_coding;protein_coding;protein_coding	ENSMUST00000056974.3;ENSMUST00000105501.1;ENSMUST00000105502.7;ENSMUST00000175881.7;ENSMUST00000177542.1	28997;29010;29007;28951;10621			0.243291	0.338746	0.305125	0.295721	0.0988168	0.095271	0.116122	0.103403	0.192317	1.85839	2.73884e-08	6.50101e-07	0.690883	0.643342	0.717848	0.684024	0.385857	0.35737	0.304037	0.349088	0.334936	2.02346	1.24949e-06	0.00013617	WTvsKO_96h	No
cg28400543_BC21	chr10	42507446	42507448	CG	GeneBody;Snx3;NM_017472;inside_[intron_between_exon_1_and_2];splice=0	FALSE	+	Snx3	Snx3;Snx3;Snx3	protein_coding;protein_coding;protein_coding	ENSMUST00000019939.11;ENSMUST00000105499.1;ENSMUST00000105500.7	5416;5157;5417			0.721371	0.743994	0.726924	0.730763	0.368791	0.336846	0.414529	0.373389	0.357374	2.19157	5.75085e-10	6.08788e-08	0.849724	0.828	0.850176	0.842634	0.778916	0.753104	0.744533	0.758851	0.0837826	0.767362	0.000358922	0.0016508	WTvsKO_0h	No
cg28404837_TC11	chr10	42860722	42860724	CG	TSS;chr10:42860666;Scml4;ENSMUST00000105495;+56;2,TSS;chr10:42860792;Scml4;ENSMUST00000105494;-70;2	FALSE	+	Scml4	Scml4;Scml4;Scml4;Scml4	protein_coding;protein_coding;protein_coding;protein_coding	ENSMUST00000063063.13;ENSMUST00000105494.7;ENSMUST00000105495.7;ENSMUST00000157071.7	353;-70;56;180			0.203973	0.347033	0.320702	0.290569	0.167864	0.202058	0.119719	0.163214	0.127355	1.07005	0.000628855	0.00124466	0.783255	0.686774	0.762691	0.74424	0.480179	0.482526	0.273991	0.412232	0.332008	2.09721	0.000150929	0.000957053	WTvsKO_96h	No
cg28421730_BC21	chr10	44441274	44441276	CG	Enhancer	FALSE	+	Prdm1	Prdm1;Prdm1;Prdm1	protein_coding;protein_coding;protein_coding	ENSMUST00000039174.10;ENSMUST00000105490.2;ENSMUST00000218369.1	17474;17413;15936			0.232092	0.281407	0.270912	0.26147	0.170472	0.117031	0.083138	0.123547	0.137923	1.38478	1.65818e-05	6.64286e-05	0.690752	0.590571	0.692442	0.657922	0.37842	0.338237	0.234027	0.316895	0.341027	2.08453	2.48006e-05	0.000352278	WTvsKO_96h	No
cg28421740_TC21	chr10	44441573	44441575	CG	EPIC;cg07695181,Enhancer	FALSE	+	Prdm1	Prdm1;Prdm1;Prdm1	protein_coding;protein_coding;protein_coding	ENSMUST00000039174.10;ENSMUST00000105490.2;ENSMUST00000218369.1	17175;17114;15637			0.22973	0.275977	0.241075	0.248927	0.164569	0.127242	0.101666	0.131159	0.117768	1.15795	4.67778e-05	0.000149751	0.752772	0.735797	0.800679	0.763083	0.431734	0.383114	0.280327	0.365058	0.398025	2.51135	2.48514e-06	0.000151663	WTvsKO_96h	No
cg28433672_BC21	chr10	45920406	45920408	CG	Random	FALSE	+								0.570627	0.63192	0.590357	0.597634	0.246906	0.218692	0.331297	0.265632	0.332003	2.05878	9.17406e-09	3.1927e-07	0.847661	0.797282	0.852903	0.832615	0.692749	0.646938	0.616773	0.652153	0.180462	1.41809	3.49055e-05	0.000417836	WTvsKO_0h	No
cg28438269_TC21	chr10	46948304	46948306	CG	Adenoma	FALSE	+								0.61577	0.683436	0.642725	0.64731	0.258066	0.235865	0.35355	0.282494	0.364817	2.24265	2.39143e-09	1.37907e-07	0.797522	0.832146	0.806824	0.812164	0.744082	0.7347	0.720161	0.732981	0.0791829	0.658898	0.00101133	0.00326958	WTvsKO_0h	No
cg28438887_TC21	chr10	47104121	47104123	CG	lincRNATSS;chr10:47102832;Gm35552;ENSMUST00000214355;1290	FALSE	+	Gm35552	Gm35552	lincRNA	ENSMUST00000214355.1	-1289			0.72921	0.774126	0.729895	0.74441	0.391947	0.327049	0.489524	0.40284	0.34157	2.12512	9.63418e-09	3.29618e-07	0.900731	0.891465	0.907701	0.899966	0.824272	0.776118	0.803276	0.801222	0.0987434	1.15483	3.05209e-05	0.00038997	WTvsKO_0h	No
cg28439714_TC21	chr10	47311757	47311759	CG	PseudogeneTSS;chr10:47310575;Gm19137;ENSMUST00000213790;1183	FALSE	+	Gm19137	Gm19137	processed_pseudogene	ENSMUST00000213790.1	-1182			0.6979	0.743665	0.704157	0.715241	0.347882	0.288803	0.399638	0.345441	0.3698	2.26317	9.22811e-10	7.96879e-08	0.865004	0.827133	0.845031	0.845723	0.808329	0.785524	0.7626	0.785484	0.0602385	0.584173	0.00534634	0.0107238	WTvsKO_0h	No
cg28443074_BC11	chr10	47996101	47996103	CG	Random	FALSE	+								0.667005	0.737979	0.700174	0.701719	0.29007	0.295494	0.432073	0.339212	0.362507	2.21962	6.08591e-09	2.46206e-07	0.824822	0.852114	0.840633	0.83919	0.76729	0.723811	0.764022	0.751707	0.087482	0.784929	0.000460533	0.00194149	WTvsKO_0h	No
cg28448283_TC21	chr10	49272891	49272893	CG	TSS;chr10:49272804;Grik2;ENSMUST00000219509;-87;2	FALSE	-	Grik2	Grik2;Grik2;Grik2;Grik2;Grik2;Grik2;Grik2	protein_coding;protein_coding;protein_coding;protein_coding;protein_coding;protein_coding;protein_coding	ENSMUST00000079751.8;ENSMUST00000105484.9;ENSMUST00000218441.1;ENSMUST00000218598.1;ENSMUST00000218823.1;ENSMUST00000219051.1;ENSMUST00000219509.1	510368;510368;510518;510368;515875;160495;-86			0.659729	0.75214	0.696987	0.702952	0.289169	0.252423	0.38815	0.309914	0.393038	2.42632	1.28394e-09	9.63209e-08	0.888509	0.867654	0.876179	0.877447	0.797181	0.731501	0.778833	0.769172	0.108276	1.0978	8.78079e-05	0.000694372	WTvsKO_0h	No
cg28449329_BC21	chr10	49553626	49553628	CG	Adenoma	FALSE	-	Grik2	Grik2;Grik2;Grik2;Grik2;Grik2;Grik2	protein_coding;protein_coding;protein_coding;protein_coding;protein_coding;protein_coding	ENSMUST00000079751.8;ENSMUST00000105484.9;ENSMUST00000218441.1;ENSMUST00000218598.1;ENSMUST00000218823.1;ENSMUST00000220263.1	229633;229633;229783;229633;235140;235128			0.424473	0.535095	0.494965	0.484844	0.151249	0.118272	0.175756	0.148426	0.336419	2.45024	3.90504e-10	4.92946e-08	0.712955	0.727052	0.72967	0.723225	0.523031	0.482855	0.419237	0.475041	0.248184	1.53155	6.31939e-06	0.000198112	WTvsKO_0h	No
cg28452501_TC11	chr10	50278549	50278551	CG	EPIC;cg09485485	FALSE	+								0.694231	0.76535	0.714029	0.724537	0.327106	0.275631	0.376847	0.326528	0.398009	2.4563	2.60994e-10	3.91698e-08	0.869948	0.887573	0.879769	0.879097	0.739692	0.700258	0.739912	0.726621	0.152476	1.45161	2.36657e-06	0.000149781	WTvsKO_0h	No
cg28460425_BC21	chr10	51779952	51779954	CG	EPIC;cg24952029	FALSE	-								0.63322	0.688006	0.670823	0.664016	0.314777	0.28403	0.402038	0.333615	0.330401	1.99486	1.19877e-08	3.78426e-07	0.817454	0.828728	0.829907	0.825363	0.71651	0.714109	0.726306	0.718975	0.106388	0.885914	4.30798e-05	0.000467582	WTvsKO_0h	No
cg28461931_TC21	chr10	52032230	52032232	CG	miRNA;chr10:52032251;Gm24084;ENSMUST00000175173;19;1	FALSE	-	Gm24084	Gm24084	miRNA	ENSMUST00000175173.1	-20			0.559257	0.608245	0.549282	0.572261	0.174557	0.152363	0.25463	0.19385	0.378411	2.51018	3.97279e-10	4.98663e-08	0.765438	0.775489	0.779475	0.773467	0.540292	0.496613	0.576024	0.537643	0.235824	1.55353	2.11249e-06	0.000146334	WTvsKO_0h	No
cg28472730_TC21	chr10	53646969	53646971	CG	TSS;chr10:53647079;Fam184a;ENSMUST00000169866;+110;2	FALSE	+	Fam184a	Fam184a;Fam184a;Fam184a;Fam184a;Fam184a;Fam184a;Fam184a;Fam184a;Fam184a;Fam184a	protein_coding;protein_coding;protein_coding;protein_coding;protein_coding;protein_coding;protein_coding;protein_coding;protein_coding;protein_coding	ENSMUST00000020003.14;ENSMUST00000163761.7;ENSMUST00000165986.7;ENSMUST00000168949.1;ENSMUST00000169866.1;ENSMUST00000171807.7;ENSMUST00000217939.1;ENSMUST00000218659.1;ENSMUST00000218682.1;ENSMUST00000218780.1	104154;52374;8064;32085;111;47854;2195;8130;28261;729			0.687933	0.775453	0.692818	0.718735	0.398732	0.31931	0.403492	0.373845	0.34489	2.11682	5.85407e-09	2.4017e-07	0.888412	0.875784	0.867432	0.87721	0.795358	0.774301	0.768155	0.779271	0.0979381	1.01852	3.7108e-05	0.000432137	WTvsKO_0h	No
cg28474098_TC21	chr10	53812765	53812767	CG	CTCF	FALSE	-								0.585433	0.666373	0.615845	0.62255	0.285867	0.254682	0.333744	0.291431	0.331119	2.01474	6.30332e-09	2.5192e-07	0.816707	0.785051	0.801458	0.801072	0.64355	0.590605	0.578353	0.604169	0.196903	1.40023	6.33913e-06	0.000198229	WTvsKO_0h	No
cg28475158_BC21	chr10	53986442	53986444	CG	Random	FALSE	-	Man1a	Man1a;Man1a;Man1a;Man1a;Man1a	protein_coding;protein_coding;protein_coding;protein_coding;protein_coding	ENSMUST00000003843.15;ENSMUST00000105470.8;ENSMUST00000146483.7;ENSMUST00000218317.1;ENSMUST00000220088.1	89354;89267;89267;89267;90167			0.559384	0.620673	0.566451	0.582169	0.218695	0.166126	0.246399	0.210407	0.371763	2.40593	3.42095e-10	4.55463e-08	0.793108	0.786261	0.804057	0.794475	0.625917	0.550044	0.616173	0.597378	0.197097	1.3798	7.50062e-06	0.000210831	WTvsKO_0h	No
cg28476461_TC11	chr10	54166553	54166555	CG	Random	FALSE	-								0.727373	0.835554	0.744646	0.769191	0.339651	0.293678	0.419436	0.350922	0.41827	2.66641	4.84392e-10	5.53752e-08	0.91011	0.871686	0.835939	0.872578	0.82015	0.731217	0.713425	0.75493	0.117648	1.1681	0.00262863	0.00636779	WTvsKO_0h	No
cg28487811_BC21	chr10	56469384	56469386	CG	VMR;chr10:56469248-56469447	FALSE	-	Gm36595	Gm36595	lincRNA	ENSMUST00000218830.1	37404			0.490634	0.598269	0.545215	0.544706	0.270128	0.162959	0.18666	0.206582	0.338124	2.23346	6.07657e-09	2.45867e-07	0.791998	0.750918	0.793641	0.778852	0.632588	0.512945	0.293941	0.479825	0.299028	1.95665	0.00111269	0.00349153	WTvsKO_0h	No
cg28490882_BC11	chr10	56982598	56982600	CG	lincRNATSS;chr10:56982232;Gm36827;ENSMUST00000220080;367	FALSE	-	Gm36827	Gm36827	lincRNA	ENSMUST00000220080.1	-366			0.616252	0.753718	0.624833	0.664934	0.341539	0.277018	0.380593	0.33305	0.331884	2.02223	5.63623e-08	1.05382e-06	0.837942	0.850985	0.831083	0.840003	0.710371	0.670888	0.708436	0.696565	0.143438	1.19334	1.00524e-05	0.000236247	WTvsKO_0h	No
cg28513499_BC11	chr10	59977931	59977933	CG	Enhancer	FALSE	-								0.360034	0.508502	0.473902	0.447479	0.156963	0.138611	0.131538	0.142371	0.305109	2.28408	1.69804e-09	1.13133e-07	0.81626	0.796461	0.844628	0.819116	0.52979	0.518843	0.404661	0.484432	0.334685	2.27945	1.76214e-06	0.000141763	WTvsKO_96h	No
cg28519931_TC11	chr10	60455492	60455494	CG	Enhancer	FALSE	-	Cdh23	Cdh23;Cdh23;Cdh23;Cdh23;Cdh23;Cdh23;Cdh23	protein_coding;protein_coding;protein_coding;protein_coding;protein_coding;protein_coding;protein_coding	ENSMUST00000073242.10;ENSMUST00000105461.9;ENSMUST00000105462.7;ENSMUST00000105463.8;ENSMUST00000105464.8;ENSMUST00000128249.7;ENSMUST00000135638.7	201841;240998;201841;240998;240998;201841;201841			0.0942638	0.258833	0.250412	0.20117	0.0563651	0.0465156	0.0729055	0.0585954	0.142574	1.90917	6.38485e-06	3.2029e-05	0.71254	0.72594	0.7973	0.74526	0.466641	0.447687	0.251627	0.388652	0.356608	2.253	9.30716e-05	0.00071836	WTvsKO_96h	No
cg28522469_TC21	chr10	60675302	60675304	CG	Enhancer	FALSE	-	Cdh23	Cdh23;Cdh23;Cdh23;Cdh23;Cdh23	protein_coding;protein_coding;protein_coding;protein_coding;protein_coding	ENSMUST00000105461.9;ENSMUST00000105463.8;ENSMUST00000105464.8;ENSMUST00000123309.1;ENSMUST00000153149.7	21188;21188;21188;11955;21188			0.560508	0.643072	0.536358	0.579979	0.262554	0.203833	0.26409	0.243493	0.336487	2.11484	4.38277e-09	1.99802e-07	0.794835	0.809647	0.786783	0.797088	0.613973	0.600366	0.584668	0.599669	0.197419	1.39205	1.58013e-06	0.000140204	WTvsKO_0h	No
cg28531115_BC11	chr10	61341813	61341815	CG	Random	FALSE	-	Pald1	Pald1;Pald1	protein_coding;protein_coding	ENSMUST00000020289.9;ENSMUST00000219240.1	41717;514			0.626089	0.778083	0.680926	0.695033	0.370458	0.256639	0.380016	0.335704	0.359328	2.21756	2.76972e-08	6.54814e-07	0.942178	0.919337	0.89905	0.920188	0.821033	0.815194	0.797725	0.811317	0.108871	1.45774	5.76479e-05	0.000546262	WTvsKO_0h	No
cg28548102_BC11	chr10	62598285	62598287	CG	EPIC;cg04743897	FALSE	+	Ddx21	Ddx21	protein_coding	ENSMUST00000045866.8	3996		Shelf	0.568062	0.712313	0.690892	0.657089	0.267407	0.226247	0.385385	0.293013	0.364076	2.25497	2.97092e-08	6.86173e-07	0.900786	0.871717	0.90082	0.891108	0.71809	0.746235	0.773318	0.745881	0.145227	1.48492	9.29321e-06	0.000228649	WTvsKO_0h	No
cg28548604_TC21	chr10	62650002	62650004	CG	Enhancer	FALSE	-	Ddx50	Ddx50;Ddx50;Ddx50;Ddx50	protein_coding;protein_coding;protein_coding;protein_coding	ENSMUST00000020270.5;ENSMUST00000218158.1;ENSMUST00000218224.1;ENSMUST00000218372.1	1216;1201;1171;-249		Shore	0.476643	0.523706	0.495404	0.498584	0.147386	0.113606	0.212829	0.15794	0.340644	2.4529	9.38221e-10	8.04336e-08	0.736957	0.743361	0.773895	0.751404	0.471817	0.480395	0.518562	0.490258	0.261146	1.65486	8.53981e-07	0.000129545	WTvsKO_0h	No
cg28551474_BC21	chr10	62891114	62891116	CG	Enhancer	FALSE	+	Tet1	Tet1;Tet1;Tet1	protein_coding;protein_coding;protein_coding	ENSMUST00000174189.1;ENSMUST00000218782.1;ENSMUST00000227494.1	8004;17882;1872		Shelf	0.117634	0.225436	0.267153	0.203408	0.0341377	0.0336493	0.0478582	0.0385484	0.164859	2.61234	4.63572e-09	2.07033e-07	0.682825	0.606507	0.702423	0.663918	0.249637	0.235696	0.26684	0.250724	0.413194	2.57088	1.14526e-07	9.01097e-05	WTvsKO_96h	No
cg28555488_BC21	chr10	63177398	63177400	CG	Enhancer	FALSE	-	Mypn	Mypn	protein_coding	ENSMUST00000095580.2	26554			0.100545	0.188194	0.192797	0.160512	0.0472325	0.0426002	0.0515693	0.047134	0.113378	1.89648	1.80371e-07	2.3441e-06	0.639893	0.563859	0.671298	0.625016	0.331868	0.336987	0.195281	0.288045	0.336971	2.08631	4.46011e-05	0.000475752	WTvsKO_96h	No
cg28556199_TC11	chr10	63243258	63243260	CG	TSS;chr10:63243910;Herc4;ENSMUST00000020258;-652;2	FALSE	-	1700120B22Rik;Herc4	1700120B22Rik;Herc4;Herc4;Herc4;Herc4;Herc4	bidirectional_promoter_lncRNA;protein_coding;protein_coding;protein_coding;protein_coding;protein_coding	ENSMUST00000054837.4;ENSMUST00000020258.9;ENSMUST00000219177.1;ENSMUST00000219230.1;ENSMUST00000219577.1;ENSMUST00000219856.1	895;-652;-685;-570;-664;-551		Shore	0.504711	0.566532	0.622721	0.564655	0.182314	0.208548	0.2752	0.222021	0.342634	2.20757	4.58578e-09	2.05541e-07	0.747592	0.78088	0.800485	0.776319	0.59384	0.631256	0.541226	0.588774	0.187545	1.28072	4.45596e-05	0.000475563	WTvsKO_0h	No
cg28566633_TC21	chr10	64599723	64599725	CG	Random	FALSE	+	Ctnna3	Ctnna3;Ctnna3;Ctnna3	protein_coding;protein_coding;protein_coding	ENSMUST00000075099.4;ENSMUST00000105440.7;ENSMUST00000105441.7	1095687;1142214;1169626			0.628812	0.691065	0.696379	0.672085	0.249062	0.192802	0.347288	0.26305	0.409035	2.56264	8.6724e-10	7.6919e-08	0.834791	0.837914	0.85492	0.842542	0.712733	0.647336	0.688131	0.682733	0.159808	1.31239	1.01259e-05	0.000237023	WTvsKO_0h	No
cg28567609_BC11	chr10	64769059	64769061	CG	Adenoma	FALSE	-	Ctnna3	Ctnna3;Ctnna3;Ctnna3	protein_coding;protein_coding;protein_coding	ENSMUST00000075099.4;ENSMUST00000105440.7;ENSMUST00000105441.7	1265023;1311550;1338962			0.56552	0.705107	0.644939	0.638522	0.242183	0.167307	0.294829	0.234773	0.403749	2.57272	1.57542e-09	1.08155e-07	0.825628	0.851457	0.828825	0.835303	0.698476	0.603953	0.65891	0.653779	0.181524	1.42245	1.66823e-05	0.000292121	WTvsKO_0h	No
cg28568048_TC11	chr10	64870790	64870792	CG	Enhancer	FALSE	+	Ctnna3	Ctnna3;Ctnna3;Ctnna3	protein_coding;protein_coding;protein_coding	ENSMUST00000075099.4;ENSMUST00000105440.7;ENSMUST00000105441.7	1366754;1413281;1440693			0.540606	0.672981	0.610985	0.608191	0.233952	0.256156	0.259168	0.249759	0.358432	2.2306	1.40926e-09	1.0139e-07	0.851437	0.86252	0.885432	0.866463	0.737613	0.648042	0.628599	0.671418	0.195045	1.66244	1.95676e-05	0.000314278	WTvsKO_0h	No
cg28568198_BC11	chr10	64896475	64896477	CG	Random	FALSE	+	Ctnna3	Ctnna3;Ctnna3;Ctnna3	protein_coding;protein_coding;protein_coding	ENSMUST00000075099.4;ENSMUST00000105440.7;ENSMUST00000105441.7	1392439;1438966;1466378			0.522833	0.670182	0.583749	0.592255	0.222079	0.175038	0.251352	0.216156	0.376098	2.42081	1.21288e-09	9.28295e-08	0.834029	0.832388	0.869307	0.845241	0.713377	0.646366	0.629362	0.663035	0.182206	1.47516	2.07612e-05	0.000323518	WTvsKO_0h	No
cg28568293_BC21	chr10	64915066	64915068	CG	Random	FALSE	-	Ctnna3	Ctnna3;Ctnna3;Ctnna3	protein_coding;protein_coding;protein_coding	ENSMUST00000075099.4;ENSMUST00000105440.7;ENSMUST00000105441.7	1411030;1457557;1484969			0.599965	0.700967	0.68855	0.663161	0.237034	0.195965	0.302269	0.245089	0.418071	2.62946	2.17948e-10	3.54426e-08	0.850859	0.870367	0.857012	0.859413	0.695846	0.680108	0.69788	0.691278	0.168135	1.45095	1.1131e-06	0.000133662	WTvsKO_0h	No
cg28568350_BC11	chr10	64928645	64928647	CG	PMDsoloWCGW	FALSE	-	Ctnna3	Ctnna3;Ctnna3;Ctnna3	protein_coding;protein_coding;protein_coding	ENSMUST00000075099.4;ENSMUST00000105440.7;ENSMUST00000105441.7	1424609;1471136;1498548			0.567327	0.692609	0.636675	0.632204	0.216791	0.172638	0.244183	0.211204	0.420999	2.70536	8.44531e-11	2.15015e-08	0.80942	0.835617	0.857783	0.834273	0.652688	0.585081	0.565109	0.600959	0.233314	1.74698	5.07728e-06	0.000184489	WTvsKO_0h	No
cg28568485_TC11	chr10	64948723	64948725	CG	Random	TRUE	-	Ctnna3	Ctnna3;Ctnna3;Ctnna3	protein_coding;protein_coding;protein_coding	ENSMUST00000075099.4;ENSMUST00000105440.7;ENSMUST00000105441.7	1444687;1491214;1518626			0.771418	0.837785	0.803056	0.804086	0.403895	0.429796	0.553407	0.462366	0.34172	2.27041	3.80446e-09	1.83425e-07	0.902964	0.911308	0.897888	0.904053	0.830375	0.814185	0.810807	0.818456	0.0855977	1.06437	1.79286e-05	0.000300911	WTvsKO_0h	No
cg28568805_BC21	chr10	65017961	65017963	CG	PMDsoloWCGW	FALSE	-								0.56255	0.668313	0.546625	0.592496	0.244485	0.216536	0.322469	0.261164	0.331332	2.06583	2.29519e-08	5.79328e-07	0.779148	0.815921	0.833499	0.809523	0.68996	0.630771	0.663023	0.661251	0.148272	1.12917	8.3322e-05	0.000674038	WTvsKO_0h	No
cg28568997_TC21	chr10	65054157	65054159	CG	PMDsoloWCGW	FALSE	+								0.511493	0.62081	0.620859	0.584388	0.196841	0.191676	0.244514	0.21101	0.373377	2.40717	4.44238e-10	5.29637e-08	0.768246	0.803687	0.849229	0.807054	0.596098	0.604386	0.619691	0.606725	0.200329	1.45965	2.71039e-05	0.000368088	WTvsKO_0h	No
cg28569255_BC11	chr10	65120277	65120279	CG	lincRNATSS;chr10:65120367;Gm28881;ENSMUST00000187710;88	FALSE	+	Gm28881	Gm28881	lincRNA	ENSMUST00000187710.1	90			0.744313	0.833208	0.790596	0.789373	0.416077	0.336019	0.487429	0.413175	0.376197	2.44097	1.55614e-09	1.07282e-07	0.931763	0.918415	0.927161	0.925779	0.867948	0.821699	0.831025	0.840224	0.0855555	1.23842	3.4275e-05	0.000413936	WTvsKO_0h	No
cg28570432_BC21	chr10	65417048	65417050	CG	PseudogeneTSS;chr10:65416746;Gm7540;ENSMUST00000219764;303	FALSE	-	Gm7540	Gm7540	processed_pseudogene	ENSMUST00000219764.1	303			0.707077	0.752463	0.676039	0.71186	0.374042	0.32285	0.44348	0.380124	0.331736	2.02522	1.18315e-08	3.75576e-07	0.863703	0.844286	0.8589	0.855629	0.745329	0.72127	0.770175	0.745591	0.110038	1.01427	5.63194e-05	0.000539544	WTvsKO_0h	No
cg28570587_TC11	chr10	65461438	65461440	CG	PMDsoloWCGW	FALSE	+								0.706174	0.816404	0.845937	0.789505	0.42201	0.316602	0.455711	0.398108	0.391397	2.56497	3.59023e-09	1.77313e-07	0.914661	0.912019	0.930452	0.919044	0.822801	0.819572	0.818584	0.820319	0.0987251	1.32172	5.14421e-06	0.000185317	WTvsKO_0h	No
cg28573544_BC21	chr10	66146259	66146261	CG	lincRNATSS;chr10:66145296;4930407I19Rik;ENSMUST00000220265;964	FALSE	+	1700023F02Rik;4930407I19Rik	1700023F02Rik;4930407I19Rik	lincRNA;lincRNA	ENSMUST00000189619.1;ENSMUST00000220265.1	107964;964			0.613685	0.726641	0.694934	0.67842	0.287391	0.253927	0.431155	0.324158	0.354262	2.17691	3.9865e-08	8.36089e-07	0.84786	0.853443	0.814618	0.83864	0.733867	0.716586	0.807735	0.75273	0.0859106	0.761162	0.00498969	0.0101832	WTvsKO_0h	No
cg28579343_TC21	chr10	66917524	66917526	CG	lincRNATSS;chr10:66917739;1110002J07Rik;ENSMUST00000219021;213	FALSE	+	1110002J07Rik	1110002J07Rik;1110002J07Rik	lincRNA;lincRNA	ENSMUST00000181710.2;ENSMUST00000219021.1	2734;215			0.30814	0.351764	0.338809	0.332904	0.072114	0.0515578	0.0606384	0.0614367	0.271468	2.94229	2.42668e-12	1.8699e-09	0.648931	0.566385	0.677439	0.630918	0.317655	0.293557	0.234561	0.281924	0.348994	2.1395	3.13749e-06	0.000161811	WTvsKO_96h	No
cg28579346_BC11	chr10	66917571	66917573	CG	lincRNATSS;chr10:66917739;1110002J07Rik;ENSMUST00000219021;166	FALSE	-	1110002J07Rik	1110002J07Rik;1110002J07Rik	lincRNA;lincRNA	ENSMUST00000181710.2;ENSMUST00000219021.1	2687;168			0.399173	0.508387	0.514985	0.474182	0.146441	0.1358	0.133733	0.138658	0.335524	2.48449	1.44554e-10	2.86387e-08	0.803258	0.782286	0.84005	0.808531	0.476066	0.446575	0.379806	0.434149	0.374383	2.47428	3.63349e-07	0.000118874	Common	No
cg28579406_BC11	chr10	66922143	66922145	CG	Enhancer	FALSE	-	Gm26576	Gm26576	lincRNA	ENSMUST00000181018.2	1842			0.50037	0.726413	0.671411	0.632731	0.213584	0.152778	0.204963	0.190441	0.44229	2.91643	4.77574e-10	5.49323e-08	0.913179	0.908417	0.921247	0.914281	0.75512	0.729635	0.664259	0.716338	0.197943	2.07062	8.20406e-07	0.000128621	WTvsKO_0h	No
cg28580996_BC21	chr10	67046322	67046324	CG	Enhancer	FALSE	-	Reep3	Reep3;Reep3	protein_coding;protein_coding	ENSMUST00000020023.8;ENSMUST00000217841.1	50623;50524			0.381195	0.495574	0.468916	0.448561	0.130958	0.101768	0.149251	0.127326	0.321236	2.493	3.04295e-10	4.27352e-08	0.733888	0.743484	0.780245	0.752539	0.448972	0.398931	0.325701	0.391201	0.361338	2.25452	1.10735e-06	0.000133662	WTvsKO_96h	No
cg28592687_BC21	chr10	68028839	68028841	CG	Enhancer	FALSE	-	Rtkn2	Rtkn2;Rtkn2;Rtkn2;Rtkn2;Rtkn2	protein_coding;protein_coding;protein_coding;protein_coding;protein_coding	ENSMUST00000068994.13;ENSMUST00000105437.7;ENSMUST00000117086.1;ENSMUST00000118160.7;ENSMUST00000147556.7	49235;49242;49125;49270;49142			0.0700882	0.101922	0.108203	0.0934043	0.0352275	0.0283486	0.0377149	0.0337637	0.0596406	1.54519	8.177e-07	6.94404e-06	0.496872	0.370542	0.497469	0.454961	0.144378	0.124349	0.06774	0.112155	0.342806	2.78954	8.85634e-06	0.000224399	WTvsKO_96h	No
cg28592878_BC11	chr10	68041478	68041480	CG	CGI;chr10:68041433-68041734	FALSE	+	Rtkn2	Rtkn2;Rtkn2;Rtkn2;Rtkn2;Rtkn2	protein_coding;protein_coding;protein_coding;protein_coding;protein_coding	ENSMUST00000068994.13;ENSMUST00000105437.7;ENSMUST00000117086.1;ENSMUST00000118160.7;ENSMUST00000147556.7	61874;61881;61764;61909;61781	CGI:chr10:68041433-68041734	Island	0.529896	0.653331	0.678548	0.620592	0.202978	0.142901	0.194979	0.180286	0.440306	2.92276	4.45137e-11	1.49626e-08	0.894091	0.893163	0.918058	0.901771	0.807771	0.82308	0.641281	0.757378	0.144393	1.49995	0.00118048	0.00363379	WTvsKO_0h	No
cg28594024_TC11	chr10	68135242	68135244	CG	Random	FALSE	+	Arid5b	Arid5b;Arid5b;Arid5b	protein_coding;protein_coding;protein_coding	ENSMUST00000020106.8;ENSMUST00000218532.1;ENSMUST00000219238.1	143479;1384;143498			0.0910995	0.205739	0.208586	0.168475	0.0369401	0.0455422	0.0417932	0.0414252	0.12705	2.14053	1.3599e-07	1.92153e-06	0.784407	0.750783	0.812331	0.782507	0.437934	0.448906	0.401958	0.4296	0.352908	2.26576	1.825e-07	0.000105765	WTvsKO_96h	No
cg28606553_BC21	chr10	69350589	69350591	CG	TSS;chr10:69350829;Cdk1;ENSMUST00000152448;+240;2	FALSE	-	Cdk1	Cdk1;Cdk1;Cdk1;Cdk1	protein_coding;protein_coding;protein_coding;protein_coding	ENSMUST00000020099.12;ENSMUST00000119827.7;ENSMUST00000124054.1;ENSMUST00000152448.1	2349;2314;2321;241		Shelf	0.454921	0.579866	0.546186	0.526991	0.175512	0.16534	0.23865	0.193167	0.333824	2.23755	3.34685e-09	1.69628e-07	0.825963	0.825929	0.868205	0.840032	0.538345	0.571977	0.600426	0.57025	0.269783	1.99509	8.45029e-07	0.000129087	WTvsKO_0h	No
cg28606554_BC21	chr10	69350607	69350609	CG	TSS;chr10:69350829;Cdk1;ENSMUST00000152448;+222;1	FALSE	-	Cdk1	Cdk1;Cdk1;Cdk1;Cdk1	protein_coding;protein_coding;protein_coding;protein_coding	ENSMUST00000020099.12;ENSMUST00000119827.7;ENSMUST00000124054.1;ENSMUST00000152448.1	2331;2296;2303;223		Shelf	0.271755	0.38907	0.404982	0.355269	0.0792923	0.080267	0.140732	0.100097	0.255172	2.34594	1.02338e-08	3.42535e-07	0.794251	0.72086	0.803557	0.772889	0.357788	0.363319	0.413403	0.37817	0.394719	2.50261	3.43002e-07	0.000117374	WTvsKO_96h	No
cg28628777_TC11	chr10	71236959	71236961	CG	TSS;chr10:71237041;Tfam;ENSMUST00000152505;+82;2	FALSE	-	Tfam	Tfam;Tfam;Tfam;Tfam	protein_coding;protein_coding;protein_coding;protein_coding	ENSMUST00000092430.10;ENSMUST00000105432.9;ENSMUST00000121685.7;ENSMUST00000152505.1	1321;1321;719;83		Shore	0.181419	0.301575	0.286818	0.256604	0.0241821	0.0171644	0.0774486	0.0395983	0.217006	3.34962	7.84116e-09	2.89466e-07	0.566959	0.634057	0.711234	0.637417	0.259738	0.210601	0.305988	0.258776	0.378641	2.36029	5.12862e-06	0.000185195	WTvsKO_96h	No
cg28633562_TC11	chr10	71664600	71664602	CG	Random	FALSE	-	Gm34544	Gm34544;Gm34544;Gm34544	lincRNA;lincRNA;lincRNA	ENSMUST00000218434.1;ENSMUST00000218514.1;ENSMUST00000219004.1	970;137320;970			0.680497	0.76849	0.737282	0.728756	0.347599	0.301286	0.419638	0.356174	0.372582	2.30004	1.63596e-09	1.10635e-07	0.854172	0.872154	0.904528	0.876951	0.769873	0.747681	0.75115	0.756235	0.120717	1.22042	8.20093e-05	0.000668074	WTvsKO_0h	No
cg28633562_TO21	chr10	71664600	71664602	CG	Random	FALSE	+								0.631554	0.723521	0.656695	0.67059	0.290269	0.22838	0.346965	0.288538	0.382052	2.35325	1.48484e-09	1.04154e-07	0.867583	0.843858	0.848467	0.853303	0.712852	0.692843	0.715184	0.706959	0.146343	1.27255	4.91105e-06	0.000182048	WTvsKO_0h	No
cg28635568_BC21	chr10	72025959	72025961	CG	lincRNATSS;chr10:72026982;Gm34609;ENSMUST00000219284;1021	FALSE	-	Gm34609	Gm34609	lincRNA	ENSMUST00000219284.1	-1022			0.686221	0.71403	0.682776	0.694342	0.31651	0.292348	0.376177	0.328345	0.365997	2.22357	6.02959e-10	6.24636e-08	0.853323	0.879782	0.843738	0.858948	0.696064	0.65508	0.704542	0.685229	0.173719	1.49006	5.83534e-06	0.000193287	WTvsKO_0h	No
cg28635951_TC21	chr10	72099366	72099368	CG	Enhancer	FALSE	+	Gm34609	Gm34609	lincRNA	ENSMUST00000219284.1	72385			0.614271	0.669065	0.612447	0.631928	0.297454	0.233053	0.35914	0.296549	0.335379	2.04698	1.22266e-08	3.83308e-07	0.779651	0.80249	0.822004	0.801381	0.679622	0.652236	0.662396	0.664751	0.13663	1.02943	4.55584e-05	0.000480858	WTvsKO_0h	No
cg28644079_BC21	chr10	73534135	73534137	CG	Adenoma	FALSE	-	Pcdh15	Pcdh15;Pcdh15	protein_coding;protein_coding	ENSMUST00000123398.8;ENSMUST00000148572.1	434794;434701			0.693131	0.764032	0.711047	0.722736	0.383257	0.284987	0.45126	0.373168	0.349568	2.15508	1.36179e-08	4.11751e-07	0.852349	0.820041	0.863767	0.845386	0.83459	0.747158	0.818391	0.800046	0.0453394	0.437232	0.0729184	0.0930684	WTvsKO_0h	No
cg28646331_TC21	chr10	73947207	73947209	CG	TSS;chr10:73947055;Pcdh15;ENSMUST00000191709-ENSMUST00000193739-ENSMUST00000195531;+152;2	FALSE	+	Pcdh15	Pcdh15;Pcdh15;Pcdh15;Pcdh15;Pcdh15;Pcdh15;Pcdh15;Pcdh15;Pcdh15;Pcdh15;Pcdh15;Pcdh15;Pcdh15;Pcdh15;Pcdh15;Pcdh15;Pcdh15;Pcdh15;Pcdh15;Pcdh15;Pcdh15;Pcdh15;Pcdh15;Pcdh15;Pcdh15;Pcdh15;Pcdh15;Pcdh15;Pcdh15;Pcdh15;Pcdh15;Pcdh15	protein_coding;protein_coding;protein_coding;protein_coding;protein_coding;protein_coding;protein_coding;protein_coding;protein_coding;protein_coding;protein_coding;protein_coding;protein_coding;protein_coding;protein_coding;protein_coding;protein_coding;protein_coding;protein_coding;protein_coding;protein_coding;protein_coding;protein_coding;protein_coding;protein_coding;protein_coding;protein_c…	ENSMUST00000064562.13;ENSMUST00000092420.12;ENSMUST00000105424.9;ENSMUST00000105426.9;ENSMUST00000105429.9;ENSMUST00000123398.8;ENSMUST00000124046.7;ENSMUST00000125006.8;ENSMUST00000125055.8;ENSMUST00000125517.8;ENSMUST00000126920.8;ENSMUST00000129404.8;ENSMUST00000131321.8;ENSMUST00000131724.8;ENSMUST00000134009.8;ENSMUST00000136096.8;ENSMUST00000144302.8;ENSMUST00000146682.7;ENSMUST00000147189.…	125341;125325;125325;125325;125325;847866;125325;125265;125325;125325;125325;125325;125325;125325;125265;125325;125325;125325;125325;125325;125325;125325;125325;125325;125325;125265;152;125325;125341;125325;152;152			0.562283	0.667237	0.587872	0.605797	0.198221	0.1723	0.304169	0.224897	0.380901	2.45052	2.53798e-09	1.42974e-07	0.855953	0.859689	0.840758	0.852133	0.708367	0.686759	0.696055	0.69706	0.155073	1.32613	2.3716e-06	0.000149781	WTvsKO_0h	No
cg28646546_TC11	chr10	73986331	73986333	CG	Adenoma	FALSE	-	Pcdh15	Pcdh15;Pcdh15;Pcdh15;Pcdh15;Pcdh15;Pcdh15;Pcdh15;Pcdh15;Pcdh15;Pcdh15;Pcdh15;Pcdh15;Pcdh15;Pcdh15;Pcdh15;Pcdh15;Pcdh15;Pcdh15;Pcdh15;Pcdh15;Pcdh15;Pcdh15;Pcdh15;Pcdh15;Pcdh15;Pcdh15;Pcdh15;Pcdh15;Pcdh15;Pcdh15;Pcdh15;Pcdh15	protein_coding;protein_coding;protein_coding;protein_coding;protein_coding;protein_coding;protein_coding;protein_coding;protein_coding;protein_coding;protein_coding;protein_coding;protein_coding;protein_coding;protein_coding;protein_coding;protein_coding;protein_coding;protein_coding;protein_coding;protein_coding;protein_coding;protein_coding;protein_coding;protein_coding;protein_coding;protein_c…	ENSMUST00000064562.13;ENSMUST00000092420.12;ENSMUST00000105424.9;ENSMUST00000105426.9;ENSMUST00000105429.9;ENSMUST00000123398.8;ENSMUST00000124046.7;ENSMUST00000125006.8;ENSMUST00000125055.8;ENSMUST00000125517.8;ENSMUST00000126920.8;ENSMUST00000129404.8;ENSMUST00000131321.8;ENSMUST00000131724.8;ENSMUST00000134009.8;ENSMUST00000136096.8;ENSMUST00000144302.8;ENSMUST00000146682.7;ENSMUST00000147189.…	164465;164449;164449;164449;164449;886990;164449;164389;164449;164449;164449;164449;164449;164449;164389;164449;164449;164449;164449;164449;164449;164449;164449;164449;164449;164389;39276;164449;164465;164449;39276;39276			0.542195	0.678267	0.631369	0.617277	0.261492	0.230546	0.305528	0.265856	0.351421	2.17253	5.05166e-09	2.18511e-07	0.781129	0.815297	0.822012	0.806146	0.646165	0.591842	0.608915	0.615641	0.190505	1.38043	7.78016e-06	0.000213601	WTvsKO_0h	No
cg28647412_TC21	chr10	74170530	74170532	CG	GeneBody;Pcdh15;NM_001142741;inside_[cds_in_exon_3];splice=0	FALSE	-	Pcdh15	Pcdh15;Pcdh15;Pcdh15;Pcdh15;Pcdh15;Pcdh15;Pcdh15;Pcdh15;Pcdh15;Pcdh15;Pcdh15;Pcdh15;Pcdh15;Pcdh15;Pcdh15;Pcdh15;Pcdh15;Pcdh15;Pcdh15;Pcdh15;Pcdh15;Pcdh15;Pcdh15;Pcdh15;Pcdh15;Pcdh15;Pcdh15;Pcdh15;Pcdh15;Pcdh15;Pcdh15;Pcdh15	protein_coding;protein_coding;protein_coding;protein_coding;protein_coding;protein_coding;protein_coding;protein_coding;protein_coding;protein_coding;protein_coding;protein_coding;protein_coding;protein_coding;protein_coding;protein_coding;protein_coding;protein_coding;protein_coding;protein_coding;protein_coding;protein_coding;protein_coding;protein_coding;protein_coding;protein_coding;protein_c…	ENSMUST00000064562.13;ENSMUST00000092420.12;ENSMUST00000105424.9;ENSMUST00000105426.9;ENSMUST00000105429.9;ENSMUST00000123398.8;ENSMUST00000124046.7;ENSMUST00000125006.8;ENSMUST00000125055.8;ENSMUST00000125517.8;ENSMUST00000126920.8;ENSMUST00000129404.8;ENSMUST00000131321.8;ENSMUST00000131724.8;ENSMUST00000134009.8;ENSMUST00000136096.8;ENSMUST00000144302.8;ENSMUST00000146682.7;ENSMUST00000147189.…	348664;348648;348648;348648;348648;1071189;348648;348588;348648;348648;348648;348648;348648;348648;348588;348648;348648;348648;348648;348648;348648;348648;348648;348648;348648;348588;223475;348648;348664;348648;223475;223475			0.584943	0.60486	0.55894	0.582914	0.227239	0.207772	0.272308	0.235773	0.347141	2.18858	7.64979e-10	7.18191e-08	0.779968	0.79606	0.783849	0.786626	0.562971	0.522114	0.530419	0.538501	0.248124	1.66006	3.75374e-07	0.000118874	WTvsKO_0h	No
cg28649509_TC21	chr10	74549096	74549098	CG	MonoallelicMeth	FALSE	+	Pcdh15	Pcdh15;Pcdh15;Pcdh15;Pcdh15;Pcdh15;Pcdh15;Pcdh15;Pcdh15;Pcdh15;Pcdh15;Pcdh15;Pcdh15;Pcdh15;Pcdh15;Pcdh15;Pcdh15;Pcdh15;Pcdh15;Pcdh15;Pcdh15;Pcdh15;Pcdh15;Pcdh15;Pcdh15;Pcdh15;Pcdh15;Pcdh15;Pcdh15;Pcdh15	protein_coding;protein_coding;protein_coding;protein_coding;protein_coding;protein_coding;protein_coding;protein_coding;protein_coding;protein_coding;protein_coding;protein_coding;protein_coding;protein_coding;protein_coding;protein_coding;protein_coding;protein_coding;protein_coding;protein_coding;protein_coding;protein_coding;protein_coding;protein_coding;protein_coding;protein_coding;protein_c…	ENSMUST00000064562.13;ENSMUST00000092420.12;ENSMUST00000105424.9;ENSMUST00000105426.9;ENSMUST00000105429.9;ENSMUST00000124046.7;ENSMUST00000125055.8;ENSMUST00000125517.8;ENSMUST00000126920.8;ENSMUST00000129404.8;ENSMUST00000131321.8;ENSMUST00000131724.8;ENSMUST00000136096.8;ENSMUST00000144302.8;ENSMUST00000146682.7;ENSMUST00000147189.8;ENSMUST00000149977.8;ENSMUST00000151116.8;ENSMUST00000152655.…	727230;727214;727214;727214;727214;727214;727214;727214;727214;727214;727214;727214;727214;727214;727214;727214;727214;727214;727214;727214;727214;727214;602041;727214;727230;727214;602041;193238;602041			0.495366	0.554663	0.503012	0.51768	0.177999	0.148543	0.20507	0.177204	0.340476	2.32946	3.26923e-10	4.4386e-08	0.672026	0.708748	0.733694	0.704823	0.500045	0.43554	0.435161	0.456915	0.247908	1.51005	6.55633e-06	0.00020047	WTvsKO_0h	No
cg28649621_BC11	chr10	74571163	74571165	CG	GeneBody;Pcdh15;NM_001142738;inside_[intron_between_exon_25_and_26];splice=0	FALSE	+	Pcdh15	Pcdh15;Pcdh15;Pcdh15;Pcdh15;Pcdh15;Pcdh15;Pcdh15;Pcdh15;Pcdh15;Pcdh15;Pcdh15;Pcdh15;Pcdh15;Pcdh15;Pcdh15;Pcdh15;Pcdh15;Pcdh15;Pcdh15;Pcdh15;Pcdh15;Pcdh15;Pcdh15;Pcdh15;Pcdh15;Pcdh15;Pcdh15;Pcdh15;Pcdh15	protein_coding;protein_coding;protein_coding;protein_coding;protein_coding;protein_coding;protein_coding;protein_coding;protein_coding;protein_coding;protein_coding;protein_coding;protein_coding;protein_coding;protein_coding;protein_coding;protein_coding;protein_coding;protein_coding;protein_coding;protein_coding;protein_coding;protein_coding;protein_coding;protein_coding;protein_coding;protein_c…	ENSMUST00000064562.13;ENSMUST00000092420.12;ENSMUST00000105424.9;ENSMUST00000105426.9;ENSMUST00000105429.9;ENSMUST00000124046.7;ENSMUST00000125055.8;ENSMUST00000125517.8;ENSMUST00000126920.8;ENSMUST00000129404.8;ENSMUST00000131321.8;ENSMUST00000131724.8;ENSMUST00000136096.8;ENSMUST00000144302.8;ENSMUST00000146682.7;ENSMUST00000147189.8;ENSMUST00000149977.8;ENSMUST00000151116.8;ENSMUST00000152655.…	749297;749281;749281;749281;749281;749281;749281;749281;749281;749281;749281;749281;749281;749281;749281;749281;749281;749281;749281;749281;749281;749281;624108;749281;749297;749281;624108;215305;624108			0.694141	0.735378	0.704816	0.711445	0.343523	0.231022	0.390047	0.321531	0.389914	2.40895	1.70329e-09	1.13359e-07	0.818665	0.890197	0.82097	0.843277	0.765497	0.742132	0.684007	0.730545	0.112732	1.015	0.00249171	0.00612878	WTvsKO_0h	No
cg28651226_BC21	chr10	74806036	74806038	CG	MonoallelicMeth	FALSE	+								0.489281	0.506696	0.491897	0.495958	0.185098	0.136076	0.169955	0.16371	0.332248	2.34095	1.90214e-10	3.27367e-08	0.642003	0.661128	0.636316	0.646482	0.430679	0.420351	0.389121	0.413384	0.233099	1.37692	2.07309e-06	0.000145927	WTvsKO_0h	No
cg28651895_BC21	chr10	74902198	74902200	CG	MonoallelicMeth	FALSE	-								0.561272	0.589387	0.560115	0.570258	0.207083	0.168371	0.254349	0.209935	0.360324	2.33945	4.54018e-10	5.34561e-08	0.771016	0.779876	0.794678	0.781857	0.60292	0.551021	0.573487	0.575809	0.206047	1.40125	2.55967e-06	0.000153392	WTvsKO_0h	No
cg28666449_TC21	chr10	76034447	76034449	CG	Enhancer	FALSE	+	Zfp280b	Zfp280b;Zfp280b	protein_coding;protein_coding	ENSMUST00000061617.6;ENSMUST00000218627.1	1794;1798		Shore	0.100598	0.177967	0.19558	0.158048	0.0294579	0.034905	0.0349045	0.0330891	0.124959	2.40409	2.58599e-09	1.44804e-07	0.617985	0.585276	0.700517	0.634593	0.188318	0.189465	0.177635	0.185139	0.449454	2.94414	5.81456e-08	6.67932e-05	WTvsKO_96h	No
cg28676996_BC21	chr10	76906716	76906718	CG	Random	FALSE	-	Pcbp3	Pcbp3;Pcbp3;Pcbp3	protein_coding;protein_coding;protein_coding	ENSMUST00000001148.10;ENSMUST00000105411.8;ENSMUST00000171437.7	55072;55171;-854			0.571848	0.683502	0.644714	0.633355	0.33485	0.2598	0.269278	0.287976	0.345379	2.10962	5.20404e-09	2.22815e-07	0.842592	0.813193	0.856116	0.8373	0.66084	0.641113	0.47719	0.593048	0.244253	1.81587	7.94408e-05	0.000656195	WTvsKO_0h	No
cg28680447_TC11	chr10	77199863	77199865	CG	Enhancer	FALSE	-								0.190091	0.311127	0.354156	0.285125	0.0929263	0.0946525	0.0730801	0.0868863	0.198238	2.03504	8.55257e-08	1.40139e-06	0.713275	0.760024	0.798579	0.757293	0.4311	0.472906	0.305872	0.403293	0.354	2.2347	1.38069e-05	0.000269474	WTvsKO_96h	No
cg28690709_BC21	chr10	78050147	78050149	CG	TSS;chr10:78049841;Dnmt3l;ENSMUST00000000746;+306;1,TSS;chr10:78049958;Dnmt3l;ENSMUST00000151242;+189;1	FALSE	-	Dnmt3l	Dnmt3l;Dnmt3l;Dnmt3l	protein_coding;protein_coding;protein_coding	ENSMUST00000000746.11;ENSMUST00000138785.7;ENSMUST00000151242.7	306;7861;189			0.0866833	0.121704	0.139629	0.116006	0.0535636	0.0375706	0.0456363	0.0455902	0.0704154	1.4455	3.12102e-06	1.86643e-05	0.540027	0.452713	0.588949	0.52723	0.223012	0.213385	0.144006	0.193468	0.333762	2.24368	7.8344e-06	0.000214159	WTvsKO_96h	No
cg28690710_TC21	chr10	78050342	78050344	CG	TSS;chr10:78049958;Dnmt3l;ENSMUST00000151242;+384;2	FALSE	-	Dnmt3l	Dnmt3l;Dnmt3l;Dnmt3l	protein_coding;protein_coding;protein_coding	ENSMUST00000000746.11;ENSMUST00000138785.7;ENSMUST00000151242.7	501;8056;384			0.108659	0.152512	0.146414	0.135862	0.0643007	0.0665305	0.0566266	0.0624859	0.0733757	1.226	1.20109e-05	5.18119e-05	0.555035	0.491867	0.611937	0.552946	0.252575	0.241197	0.155421	0.216398	0.336548	2.19661	1.09279e-05	0.000244434	WTvsKO_96h	No
cg28691318_BC21	chr10	78101685	78101687	CG	Enhancer	FALSE	-								0.605922	0.698331	0.62058	0.641611	0.344217	0.260555	0.313293	0.306022	0.335589	2.03612	8.3103e-09	2.99644e-07	0.850919	0.844058	0.832639	0.842538	0.706464	0.616519	0.593411	0.638798	0.20374	1.58882	1.42511e-05	0.000273002	WTvsKO_0h	No
cg28698822_TC21	chr10	78851924	78851926	CG	TSS;chr10:78852165;Olfr1356;ENSMUST00000205100;+241;2	FALSE	-	Olfr1356	Olfr1356	protein_coding	ENSMUST00000205100.2	242			0.648919	0.682432	0.620731	0.650694	0.296866	0.244644	0.332719	0.29141	0.359285	2.19168	1.31502e-09	9.76983e-08	0.818043	0.802357	0.829686	0.816695	0.622494	0.568617	0.611278	0.600796	0.215899	1.56705	1.44258e-06	0.00013778	WTvsKO_0h	No
cg28699584_TC21	chr10	78982256	78982258	CG	TSS;chr10:78981114;Olfr1352;ENSMUST00000203973;+1142;2	FALSE	-	Gm47343;Olfr1352	Gm47343;Olfr1352;Olfr1352	lincRNA;protein_coding;protein_coding	ENSMUST00000219714.1;ENSMUST00000058991.4;ENSMUST00000203973.1	30636;1207;1142			0.589509	0.638229	0.575746	0.601161	0.19145	0.157613	0.253941	0.201001	0.40016	2.61097	1.2823e-10	2.70129e-08	0.792058	0.811645	0.795177	0.799627	0.553304	0.532892	0.555469	0.547222	0.252405	1.72448	2.08164e-07	0.000108104	WTvsKO_0h	No
cg28703407_TC11	chr10	79594861	79594863	CG	Random	FALSE	-								0.570218	0.672945	0.638313	0.627158	0.269237	0.219455	0.262641	0.250444	0.376714	2.34291	4.2792e-10	5.16213e-08	0.821176	0.823356	0.844805	0.829779	0.679929	0.628378	0.614815	0.641041	0.188738	1.44832	4.88752e-06	0.000181895	WTvsKO_0h	No
cg28706077_TC11	chr10	79739430	79739432	CG	TSS;chr10:79739373;Polrmt;ENSMUST00000161662;-57;1	FALSE	+	Polrmt	Polrmt;Polrmt;Polrmt;Polrmt;Polrmt;Polrmt;Polrmt;Polrmt	protein_coding;protein_coding;protein_coding;protein_coding;protein_coding;protein_coding;protein_coding;protein_coding	ENSMUST00000020580.12;ENSMUST00000159016.7;ENSMUST00000159082.7;ENSMUST00000161662.7;ENSMUST00000161765.7;ENSMUST00000162679.1;ENSMUST00000162687.1;ENSMUST00000162694.7	7149;7151;7143;-56;7143;-55;-799;7141	CGI:chr10:79739313-79739593	Island	0.860896	0.86961	0.821394	0.850633	0.541549	0.486199	0.420121	0.482623	0.36801	2.62426	9.08489e-11	2.22831e-08	0.95559	0.939025	0.940154	0.944923	0.780563	0.690726	0.711771	0.727687	0.217236	2.68391	3.11041e-07	0.000112803	WTvsKO_0h	No
cg28706554_BC11	chr10	79764688	79764690	CG	Random	TRUE	-	Rnf126	Rnf126;Rnf126;Rnf126	protein_coding;protein_coding;protein_coding	ENSMUST00000047203.8;ENSMUST00000218770.1;ENSMUST00000219189.1	2264;2253;2222		Shore	0.755154	0.8718	0.817449	0.814801	0.431891	0.290101	0.428201	0.383398	0.431403	2.8857	4.17297e-10	5.1129e-08	0.956998	0.965715	0.961125	0.961279	0.951531	0.944447	0.910255	0.935411	0.0258682	0.731589	0.0117188	0.0196908	WTvsKO_0h	No
cg28720392_BC11	chr10	80395553	80395555	CG	CGI;chr10:80395296-80395621,TSS;chr10:80395718;Mbd3;ENSMUST00000105347;+165;2	FALSE	+	Mbd3	Mbd3;Mbd3;Mbd3;Mbd3;Mbd3;Mbd3	protein_coding;protein_coding;protein_coding;protein_coding;protein_coding;protein_coding	ENSMUST00000092295.9;ENSMUST00000105347.1;ENSMUST00000105348.7;ENSMUST00000105349.7;ENSMUST00000125618.1;ENSMUST00000142997.7	3997;166;3869;3997;-227;-383	CGI:chr10:80395296-80395621	Island	0.162645	0.324372	0.337526	0.274848	0.0708967	0.062979	0.0590462	0.0643073	0.21054	2.40195	1.56417e-08	4.50636e-07	0.665764	0.608294	0.686761	0.653607	0.323099	0.274985	0.251891	0.283325	0.370282	2.26592	4.45733e-07	0.000121994	WTvsKO_96h	No
cg28720640_TC21	chr10	80405786	80405788	CG	Adenoma	FALSE	-	Uqcr11	Uqcr11;Uqcr11;Uqcr11	protein_coding;protein_coding;protein_coding	ENSMUST00000020372.5;ENSMUST00000138428.7;ENSMUST00000141683.1	1044;980;1009		Shore	0.469877	0.498418	0.519536	0.495944	0.10997	0.0885996	0.153499	0.117356	0.378588	2.92412	1.37256e-11	6.77765e-09	0.741796	0.753231	0.810793	0.768607	0.439942	0.384759	0.474793	0.433164	0.335442	2.13429	1.44294e-06	0.00013778	Common	No
cg28728298_TC21	chr10	80828204	80828206	CG	TSS;chr10:80828592;Oaz1;ENSMUST00000179341;-388;2	FALSE	+	Mir1982;Oaz1	Mir1982;Oaz1;Oaz1;Oaz1;Oaz1;Oaz1;Oaz1;Oaz1	miRNA;protein_coding;protein_coding;protein_coding;protein_coding;protein_coding;protein_coding;protein_coding	ENSMUST00000157368.1;ENSMUST00000060987.14;ENSMUST00000177850.7;ENSMUST00000179172.7;ENSMUST00000179341.1;ENSMUST00000179620.7;ENSMUST00000179894.1;ENSMUST00000180036.7	-592;1549;1522;1512;-388;493;1523;1519		Shore	0.414299	0.465689	0.451641	0.443876	0.0992913	0.0927395	0.134154	0.108728	0.335148	2.72802	1.76266e-11	8.05916e-09	0.784706	0.784524	0.814604	0.794612	0.449413	0.419271	0.495359	0.454681	0.339931	2.21844	1.50465e-07	0.000100085	Common	No
cg28744773_BC21	chr10	81644827	81644829	CG	Enhancer	FALSE	+	Ankrd24	Ankrd24;Ankrd24;Ankrd24;Ankrd24	protein_coding;protein_coding;protein_coding;protein_coding	ENSMUST00000119336.7;ENSMUST00000132458.1;ENSMUST00000137978.1;ENSMUST00000154707.7	16193;1025;3884;11125		Shore	0.541494	0.595131	0.612242	0.582956	0.235011	0.200264	0.268611	0.234628	0.348328	2.20006	1.05893e-09	8.64411e-08	0.820771	0.81657	0.827881	0.821741	0.697697	0.704671	0.669674	0.690681	0.13106	1.04491	1.75933e-05	0.000298559	WTvsKO_0h	No
cg28747964_BC21	chr10	82199409	82199411	CG	MonoallelicMeth	FALSE	+	Gm15608	Gm15608	lincRNA	ENSMUST00000156803.8	21175			0.541682	0.554637	0.502231	0.53285	0.162994	0.136803	0.204246	0.168015	0.364835	2.51685	1.07466e-10	2.44587e-08	0.690001	0.736507	0.71656	0.714356	0.482277	0.483051	0.491767	0.485698	0.228658	1.40766	2.01199e-06	0.000145104	WTvsKO_0h	No
cg28749257_BC21	chr10	82430738	82430740	CG	PseudogeneTSS;chr10:82430704;Gm8188;ENSMUST00000219737;35	FALSE	+	Gm8188	Gm8188	processed_pseudogene	ENSMUST00000219737.1	35			0.622849	0.689969	0.663744	0.658854	0.308104	0.234096	0.215748	0.252649	0.406205	2.5327	1.37978e-10	2.78966e-08	0.760679	0.734885	0.737335	0.7443	0.568788	0.493508	0.332203	0.464833	0.279467	1.75789	0.00022678	0.00123154	WTvsKO_0h	No
cg28749340_TC11	chr10	82442598	82442600	CG	PseudogeneTSS;chr10:82442617;Gm47809;ENSMUST00000220078;17	FALSE	-	Gm47809	Gm47809	processed_pseudogene	ENSMUST00000220078.1	-18			0.736919	0.788124	0.744894	0.756646	0.387143	0.313968	0.387637	0.362916	0.39373	2.45905	1.25566e-10	2.67565e-08	0.882538	0.903267	0.880436	0.888747	0.759313	0.705547	0.722756	0.729205	0.159542	1.57079	3.27594e-06	0.000163921	WTvsKO_0h	No
cg28749412_TC11	chr10	82465205	82465207	CG	Random	FALSE	+								0.466012	0.565533	0.498326	0.509957	0.150295	0.109363	0.152822	0.137494	0.372464	2.72332	3.52872e-11	1.28739e-08	0.724447	0.762269	0.761182	0.749299	0.553723	0.542863	0.478955	0.52518	0.224119	1.43673	7.59511e-06	0.000211757	WTvsKO_0h	No
cg28749504_BC21	chr10	82488513	82488515	CG	GeneBody;Gm1553;NM_001255990;inside_[intron_between_exon_2_and_3];splice=0	FALSE	+	Gm1553	Gm1553	protein_coding	ENSMUST00000177934.2	4105			0.542608	0.610686	0.551718	0.568337	0.242762	0.179009	0.259429	0.227066	0.341271	2.18245	2.24077e-09	1.33099e-07	0.70856	0.743213	0.732039	0.727937	0.584218	0.584591	0.541536	0.570115	0.157822	1.01366	4.14854e-05	0.000458139	WTvsKO_0h	No
cg28751978_BC21	chr10	82771566	82771568	CG	lincRNATSS;chr10:82771321;Gm47561;ENSMUST00000219360;246	FALSE	+	Gm47561	Gm47561	lincRNA	ENSMUST00000219360.1	246			0.29693	0.434458	0.39314	0.374843	0.195113	0.120941	0.102197	0.139417	0.235426	1.9303	2.97547e-07	3.36166e-06	0.606257	0.495851	0.607759	0.569956	0.291392	0.26797	0.118714	0.226025	0.343931	2.28482	0.000198086	0.00113082	WTvsKO_96h	No
cg28752499_TC11	chr10	82814898	82814900	CG	Enhancer	FALSE	+	1700028I16Rik	1700028I16Rik;1700028I16Rik	lincRNA;lincRNA	ENSMUST00000076984.7;ENSMUST00000178540.7	2776;2776		Shelf	0.559764	0.825002	0.731981	0.705582	0.404596	0.403319	0.273748	0.360554	0.345028	2.18771	1.03025e-06	8.23501e-06	0.911757	0.91601	0.932016	0.919928	0.836627	0.849341	0.508957	0.731641	0.188287	1.8967	0.00646732	0.0123961	WTvsKO_0h	No
cg28759659_BC21	chr10	83344490	83344492	CG	lincRNATSS;chr10:83344513;Gm40723;ENSMUST00000219407;21	FALSE	+	Gm40723	Gm40723	lincRNA	ENSMUST00000219407.1	-22			0.0920677	0.180474	0.174765	0.149102	0.0530122	0.0574298	0.0572044	0.0558822	0.09322	1.50474	5.84541e-06	2.99716e-05	0.684199	0.654528	0.696755	0.678494	0.338865	0.330873	0.212512	0.294083	0.384411	2.36914	2.98503e-06	0.000159514	WTvsKO_96h	No
cg28823488_BC21	chr10	90224268	90224270	CG	Random	FALSE	+	Anks1b	Anks1b;Anks1b;Anks1b;Anks1b	protein_coding;protein_coding;protein_coding;protein_coding	ENSMUST00000099368.10;ENSMUST00000182907.7;ENSMUST00000182936.7;ENSMUST00000183156.7	350597;350631;350731;350760			0.606922	0.664595	0.573966	0.615161	0.222237	0.167935	0.282922	0.224365	0.390796	2.50034	6.63279e-10	6.60186e-08	0.811407	0.785764	0.820686	0.805953	0.593893	0.555583	0.580706	0.576727	0.229226	1.61138	9.42545e-07	0.000131132	WTvsKO_0h	No
cg28828760_BC11	chr10	90890401	90890403	CG	MonoallelicMeth	FALSE	+	Anks1b	Anks1b;Anks1b;Anks1b;Anks1b;Anks1b;Anks1b;Anks1b;Anks1b;Anks1b;Anks1b;Anks1b;Anks1b;Anks1b;Anks1b;Anks1b;Anks1b;Anks1b;Anks1b;Anks1b;Anks1b;Anks1b;Anks1b;Anks1b	protein_coding;protein_coding;protein_coding;protein_coding;protein_coding;protein_coding;protein_coding;protein_coding;protein_coding;protein_coding;protein_coding;protein_coding;protein_coding;protein_coding;protein_coding;protein_coding;protein_coding;protein_coding;protein_coding;protein_coding;protein_coding;protein_coding;protein_coding	ENSMUST00000099364.11;ENSMUST00000179337.8;ENSMUST00000179694.8;ENSMUST00000182053.7;ENSMUST00000182113.7;ENSMUST00000182192.7;ENSMUST00000182202.7;ENSMUST00000182284.7;ENSMUST00000182356.7;ENSMUST00000182427.7;ENSMUST00000182430.7;ENSMUST00000182550.7;ENSMUST00000182595.7;ENSMUST00000182600.7;ENSMUST00000182632.7;ENSMUST00000182786.7;ENSMUST00000182907.7;ENSMUST00000182960.7;ENSMUST00000182966.7…	313410;60621;60836;314025;313885;61291;60974;313711;314675;314150;313684;313437;313587;313790;60583;313832;1016764;313666;60968;61281;313601;60559;1016893			0.475298	0.605529	0.506877	0.529235	0.209489	0.140337	0.202675	0.184167	0.345068	2.34069	2.13268e-09	1.2905e-07	0.731349	0.758046	0.749909	0.746435	0.556779	0.518192	0.470989	0.51532	0.231114	1.47004	5.09794e-06	0.000185033	WTvsKO_0h	No
cg28838258_TC21	chr10	91967724	91967726	CG	Enhancer	FALSE	+								0.643867	0.695042	0.64197	0.660293	0.373608	0.313457	0.28548	0.324181	0.336112	2.02849	4.71973e-09	2.09212e-07	0.852668	0.797141	0.843162	0.83099	0.727591	0.687821	0.652064	0.689158	0.141832	1.15687	0.000166692	0.00101599	WTvsKO_0h	No
cg28849456_BC11	chr10	93273537	93273539	CG	CTCF	FALSE	+	Elk3	Elk3;Elk3;Elk3	protein_coding;protein_coding;protein_coding	ENSMUST00000008542.11;ENSMUST00000129827.7;ENSMUST00000151153.1	37598;37274;37432			0.243858	0.417166	0.401463	0.354162	0.177302	0.0979985	0.126534	0.133945	0.220217	1.83747	1.42698e-06	1.0451e-05	0.690459	0.640542	0.734006	0.688336	0.413843	0.29124	0.202756	0.302613	0.385722	2.40529	3.80804e-05	0.000437742	WTvsKO_96h	No
cg28850327_TC11	chr10	93335501	93335503	CG	lincRNATSS;chr10:93335393;Gm17745;ENSMUST00000212186;109	FALSE	-	Gm17745	Gm17745	lincRNA	ENSMUST00000212186.2	109			0.287782	0.440012	0.431593	0.386463	0.111536	0.0794274	0.07135	0.0874377	0.299025	2.72611	3.57753e-10	4.67667e-08	0.802514	0.82074	0.832947	0.818734	0.56896	0.558432	0.332125	0.486506	0.332228	2.26805	6.48625e-05	0.000584476	WTvsKO_96h	No
cg28850343_BC21	chr10	93336424	93336426	CG	Enhancer	FALSE	+	Gm17745	Gm17745	lincRNA	ENSMUST00000212186.2	1032			0.550525	0.693907	0.630963	0.625132	0.296017	0.192384	0.280461	0.256287	0.368844	2.30865	5.80207e-09	2.38942e-07	0.867156	0.860454	0.881557	0.869723	0.802882	0.803016	0.655429	0.753776	0.115947	1.08189	0.00321083	0.0073459	WTvsKO_0h	No
cg28852183_TC11	chr10	93489170	93489172	CG	Random	FALSE	+	Hal	Hal;Hal	protein_coding;protein_coding	ENSMUST00000016031.13;ENSMUST00000129421.7	368;403			0.84783	0.902987	0.884051	0.878289	0.541062	0.38507	0.589451	0.505194	0.373095	2.84772	3.52328e-10	4.6445e-08	0.969965	0.977422	0.968025	0.971804	0.966379	0.961588	0.959745	0.962571	0.00923303	0.43428	0.0279172	0.0403071	WTvsKO_0h	No
cg28870158_TC21	chr10	94981687	94981689	CG	Enhancer	FALSE	+								0.690773	0.692311	0.663701	0.682262	0.319085	0.270396	0.421787	0.337089	0.345172	2.09698	9.7233e-09	3.31598e-07	0.868284	0.85066	0.855813	0.858252	0.721713	0.667259	0.68666	0.691877	0.166375	1.42983	3.25033e-06	0.000163283	WTvsKO_0h	No
cg28874468_TC11	chr10	95357602	95357604	CG	ZygoteUnmeth	FALSE	+	2310039L15Rik	2310039L15Rik;2310039L15Rik	lincRNA;lincRNA	ENSMUST00000185313.1;ENSMUST00000220058.1	21327;2715			0.596531	0.70865	0.643914	0.649698	0.321433	0.207259	0.16658	0.231757	0.417941	2.67911	1.15314e-09	9.00572e-08	0.903258	0.885923	0.906534	0.898572	0.724358	0.632597	0.415776	0.59091	0.307661	2.59028	8.48351e-05	0.000680714	WTvsKO_0h	No
cg28877906_TC11	chr10	95616519	95616521	CG	Enhancer	FALSE	-								0.084774	0.200253	0.214041	0.166356	0.0625791	0.0536595	0.0243173	0.046852	0.119504	2.02168	6.60142e-06	3.28477e-05	0.629709	0.52813	0.633645	0.597161	0.277438	0.24591	0.109159	0.210836	0.386325	2.58175	7.67332e-05	0.000643124	WTvsKO_96h	No
cg28879104_BC11	chr10	95717494	95717496	CG	lincRNATSS;chr10:95717507;Gm47671;ENSMUST00000217814;11	FALSE	-	Gm47671	Gm47671	lincRNA	ENSMUST00000217814.1	13			0.0909899	0.280252	0.236964	0.202735	0.0818527	0.0386157	0.0204247	0.0469644	0.155771	2.44696	5.57473e-06	2.88911e-05	0.799148	0.76146	0.81178	0.790796	0.443971	0.403054	0.0892108	0.312079	0.478717	3.33956	0.000609985	0.00233271	WTvsKO_96h	No
cg28879130_TC11	chr10	95719625	95719627	CG	Enhancer	FALSE	-	1110019B22Rik	1110019B22Rik;1110019B22Rik	lincRNA;lincRNA	ENSMUST00000217833.1;ENSMUST00000218396.1	2875;2864			0.146519	0.262394	0.277459	0.228791	0.0576997	0.0431867	0.0355844	0.0454902	0.1833	2.61509	1.93798e-09	1.21779e-07	0.572395	0.533501	0.613407	0.573101	0.301181	0.257341	0.134156	0.230893	0.342209	2.23796	7.37777e-05	0.000629276	WTvsKO_96h	No
cg28888700_TC11	chr10	96855197	96855199	CG	miRNA;chr10:96855670;Gm24587;ENSMUST00000116697;471;2	FALSE	-	Gm48521	Gm48521	lincRNA	ENSMUST00000218446.1	54159			0.652239	0.811549	0.750558	0.738115	0.407146	0.354292	0.459712	0.40705	0.331065	2.08138	5.82137e-08	1.07741e-06	0.910661	0.8863	0.886244	0.894402	0.787327	0.750077	0.738377	0.758594	0.135808	1.43438	9.87843e-06	0.000234437	WTvsKO_0h	No
cg28892026_TC21	chr10	97390773	97390775	CG	Adenoma	FALSE	-								0.514791	0.55864	0.505022	0.526151	0.152285	0.142304	0.205319	0.166636	0.359515	2.49171	1.25579e-10	2.67565e-08	0.697245	0.740896	0.723574	0.720572	0.502328	0.473046	0.482285	0.485886	0.234686	1.45068	1.78399e-06	0.000141929	WTvsKO_0h	No
cg28893409_BC21	chr10	97627283	97627285	CG	Random	FALSE	+								0.651552	0.696956	0.619285	0.655931	0.279163	0.22475	0.305819	0.269911	0.38602	2.3813	3.53136e-10	4.64948e-08	0.848903	0.85532	0.864233	0.856152	0.70421	0.658028	0.645408	0.669215	0.186937	1.55475	1.72058e-06	0.000141264	WTvsKO_0h	No
cg28893487_TC11	chr10	97647101	97647103	CG	TSS;chr10:97647088;Epyc;ENSMUST00000105285;+13;1	FALSE	+	Epyc	Epyc;Epyc	protein_coding;protein_coding	ENSMUST00000020094.7;ENSMUST00000105285.3	3034;13			0.419242	0.579989	0.487662	0.495631	0.140894	0.109813	0.224689	0.158465	0.337166	2.44612	1.034e-08	3.44911e-07	0.725755	0.813035	0.816679	0.785156	0.530155	0.479073	0.517616	0.508948	0.276208	1.84162	8.49788e-06	0.000220724	WTvsKO_0h	No
cg28893489_TC21	chr10	97647221	97647223	CG	TSS;chr10:97647088;Epyc;ENSMUST00000105285;+133;2	FALSE	-	Epyc	Epyc;Epyc	protein_coding;protein_coding	ENSMUST00000020094.7;ENSMUST00000105285.3	3154;133			0.641319	0.690173	0.606858	0.646117	0.280649	0.222078	0.343361	0.282029	0.364088	2.24067	3.08666e-09	1.61669e-07	0.799	0.780033	0.810046	0.79636	0.723398	0.664444	0.676213	0.688019	0.108341	0.824862	0.000389567	0.00174194	WTvsKO_0h	No
cg28893701_BC21	chr10	97681365	97681367	CG	lincRNATSS;chr10:97682416;Gm10754;ENSMUST00000099324;1049	FALSE	-	Epyc	Epyc;Epyc	protein_coding;protein_coding	ENSMUST00000020094.7;ENSMUST00000105285.3	37298;34277			0.589008	0.611196	0.597861	0.599355	0.15275	0.136544	0.203421	0.164238	0.435117	2.94853	4.01155e-12	2.72929e-09	0.821785	0.828622	0.76258	0.804329	0.510564	0.480882	0.582592	0.524679	0.27965	1.91017	5.69312e-06	0.000191526	WTvsKO_0h	No
cg28894329_TC11	chr10	97792977	97792979	CG	Random	FALSE	+	Gm10754	Gm10754	lincRNA	ENSMUST00000220233.1	174113			0.722954	0.803668	0.75583	0.760817	0.377317	0.321313	0.507934	0.402188	0.358629	2.26765	1.11144e-08	3.60749e-07	0.915371	0.923659	0.910449	0.916493	0.859456	0.795461	0.832946	0.829287	0.0872056	1.16268	9.803e-05	0.000738908	WTvsKO_0h	No
cg28899733_TC11	chr10	98799861	98799863	CG	Adenoma	FALSE	-								0.739537	0.786187	0.75549	0.760405	0.407217	0.385272	0.451728	0.414739	0.345666	2.16893	7.97601e-10	7.33364e-08	0.875855	0.885623	0.875561	0.879013	0.827882	0.783767	0.793751	0.8018	0.077213	0.839389	0.000264892	0.00135792	WTvsKO_0h	No
cg28916140_TC21	chr10	100591143	100591145	CG	TSS;chr10:100590483;1700017N19Rik;ENSMUST00000218464;+660;2,TSS;chr10:100590510;1700017N19Rik;ENSMUST00000188930;+633;1	FALSE	-	1700017N19Rik;4930430F08Rik	1700017N19Rik;1700017N19Rik;1700017N19Rik;1700017N19Rik;1700017N19Rik;1700017N19Rik;1700017N19Rik;1700017N19Rik;1700017N19Rik;4930430F08Rik	protein_coding;protein_coding;protein_coding;protein_coding;protein_coding;protein_coding;protein_coding;protein_coding;protein_coding;protein_coding	ENSMUST00000041162.12;ENSMUST00000186825.6;ENSMUST00000187119.6;ENSMUST00000188736.6;ENSMUST00000188930.6;ENSMUST00000190386.6;ENSMUST00000190708.6;ENSMUST00000191336.6;ENSMUST00000218464.1;ENSMUST00000219410.1	-1241;-1237;-1206;-1226;633;-1252;-1264;-1232;660;-720		Shore	0.522751	0.60634	0.555958	0.561683	0.227392	0.193589	0.257564	0.226182	0.335501	2.14308	1.87863e-09	1.19313e-07	0.780862	0.782734	0.762	0.775199	0.577428	0.531908	0.560544	0.556627	0.218572	1.45839	1.42793e-06	0.00013778	WTvsKO_0h	No
cg28916141_BC11	chr10	100591364	100591366	CG	Random	FALSE	-	1700017N19Rik;4930430F08Rik	1700017N19Rik;1700017N19Rik;1700017N19Rik;1700017N19Rik;1700017N19Rik;1700017N19Rik;1700017N19Rik;1700017N19Rik;1700017N19Rik;4930430F08Rik	protein_coding;protein_coding;protein_coding;protein_coding;protein_coding;protein_coding;protein_coding;protein_coding;protein_coding;protein_coding	ENSMUST00000041162.12;ENSMUST00000186825.6;ENSMUST00000187119.6;ENSMUST00000188736.6;ENSMUST00000188930.6;ENSMUST00000190386.6;ENSMUST00000190708.6;ENSMUST00000191336.6;ENSMUST00000218464.1;ENSMUST00000219410.1	-1020;-1016;-985;-1005;854;-1031;-1043;-1011;881;-941		Shelf	0.803446	0.880677	0.821742	0.835288	0.398259	0.301341	0.426181	0.37526	0.460028	3.11916	1.62901e-11	7.68104e-09	0.949016	0.955738	0.96607	0.956941	0.887892	0.85921	0.867976	0.871693	0.0852487	1.72349	4.94565e-06	0.000182369	WTvsKO_0h	No
cg28916149_TC11	chr10	100592580	100592582	CG	TSS;chr10:100592349;1700017N19Rik;ENSMUST00000187119;+231;1,TSS;chr10:100592369;1700017N19Rik;ENSMUST00000188736;+211;1,TSS;chr10:100592375;1700017N19Rik;ENSMUST00000191336;+205;1,TSS;chr10:100592384;1700017N19Rik;ENSMUST00000041162;+196;1,TSS;chr10:100592395;1700017N19Rik;ENSMUST00000190386;+185;1,TSS;chr10:100592407;1700017N19Rik;ENSMUST00000190708;+173;1	FALSE	+	1700017N19Rik	1700017N19Rik;1700017N19Rik;1700017N19Rik;1700017N19Rik;1700017N19Rik;1700017N19Rik;1700017N19Rik;1700017N19Rik;1700017N19Rik	protein_coding;protein_coding;protein_coding;protein_coding;protein_coding;protein_coding;protein_coding;protein_coding;protein_coding	ENSMUST00000041162.12;ENSMUST00000186825.6;ENSMUST00000187119.6;ENSMUST00000188736.6;ENSMUST00000188930.6;ENSMUST00000190386.6;ENSMUST00000190708.6;ENSMUST00000191336.6;ENSMUST00000218464.1	196;200;231;211;2070;185;173;205;2097		Shelf	0.491205	0.616692	0.611382	0.573093	0.120212	0.141979	0.178509	0.1469	0.426193	2.98606	1.67923e-11	7.77741e-09	0.722532	0.857987	0.849097	0.809872	0.528161	0.506473	0.398417	0.477683	0.332188	2.28748	4.96329e-05	0.000503567	Common	No
cg28916159_BC11	chr10	100594554	100594556	CG	Random	FALSE	-	1700017N19Rik	1700017N19Rik;1700017N19Rik;1700017N19Rik;1700017N19Rik;1700017N19Rik;1700017N19Rik;1700017N19Rik;1700017N19Rik;1700017N19Rik	protein_coding;protein_coding;protein_coding;protein_coding;protein_coding;protein_coding;protein_coding;protein_coding;protein_coding	ENSMUST00000041162.12;ENSMUST00000186825.6;ENSMUST00000187119.6;ENSMUST00000188736.6;ENSMUST00000188930.6;ENSMUST00000190386.6;ENSMUST00000190708.6;ENSMUST00000191336.6;ENSMUST00000218464.1	2170;2174;2205;2185;4044;2159;2147;2179;4071			0.716162	0.811361	0.694642	0.740722	0.399957	0.372226	0.457828	0.410004	0.330718	2.06964	1.95973e-08	5.20177e-07	0.859825	0.867776	0.870803	0.866135	0.791099	0.725873	0.749664	0.755545	0.110589	1.05854	7.55438e-05	0.000637389	WTvsKO_0h	No
cg28917019_TC11	chr10	100741588	100741590	CG	lincRNATSS;chr10:100741635;Gm35722;ENSMUST00000218270;45	FALSE	-	Gm35722	Gm35722	lincRNA	ENSMUST00000218270.1	47			0.750746	0.853843	0.782537	0.795709	0.421503	0.370744	0.536971	0.443073	0.352636	2.33027	1.05161e-08	3.48143e-07	0.910999	0.938433	0.912487	0.92064	0.857835	0.825704	0.818173	0.833904	0.0867361	1.22026	0.000115913	0.000815337	WTvsKO_0h	No
cg28917712_TC21	chr10	100874697	100874699	CG	PMDsoloWCGW	FALSE	+								0.550179	0.626012	0.547227	0.574473	0.185656	0.163292	0.289547	0.212832	0.361641	2.36411	3.4511e-09	1.72998e-07	0.813991	0.757437	0.783513	0.78498	0.6144	0.568514	0.647248	0.610054	0.174926	1.22749	5.75817e-05	0.00054594	WTvsKO_0h	No
cg28917977_BC11	chr10	100931362	100931364	CG	Random	FALSE	-								0.622542	0.696248	0.727544	0.682111	0.293032	0.251618	0.364373	0.303007	0.379104	2.32716	1.78069e-09	1.15882e-07	0.849283	0.8717	0.844221	0.855068	0.740325	0.680847	0.690414	0.703862	0.151206	1.31173	1.61299e-05	0.000287844	WTvsKO_0h	No
cg28918010_BC21	chr10	100938388	100938390	CG	Random	FALSE	-								0.545695	0.609052	0.538149	0.564299	0.184378	0.154165	0.291276	0.20994	0.354359	2.33619	5.80956e-09	2.39138e-07	0.789826	0.766453	0.771622	0.775967	0.568756	0.522756	0.628495	0.573336	0.202631	1.36389	2.14851e-05	0.000328764	WTvsKO_0h	No
cg28918459_BC21	chr10	101026232	101026234	CG	PMDsoloWCGW	FALSE	-								0.660164	0.695824	0.699805	0.685265	0.218896	0.205237	0.35623	0.260121	0.425144	2.6717	3.61474e-10	4.70207e-08	0.827247	0.841754	0.867114	0.845372	0.693851	0.704817	0.712866	0.703845	0.141527	1.20964	1.67076e-05	0.000292229	WTvsKO_0h	No
cg28918528_TC21	chr10	101043023	101043025	CG	PMDsoloWCGW	FALSE	-								0.489738	0.601745	0.518024	0.536502	0.178081	0.130219	0.273902	0.194067	0.342435	2.33099	1.74305e-08	4.8248e-07	0.791082	0.79206	0.794517	0.792553	0.542304	0.524494	0.630737	0.565845	0.226709	1.54761	8.40665e-06	0.000219995	WTvsKO_0h	No
cg28918542_BC11	chr10	101045413	101045415	CG	PMDsoloWCGW	FALSE	+								0.673817	0.802521	0.739562	0.738633	0.338337	0.275207	0.3546	0.322715	0.415918	2.60131	3.29266e-10	4.4542e-08	0.858413	0.903608	0.853822	0.871948	0.842805	0.783886	0.804655	0.810449	0.0614987	0.683685	0.0112133	0.0190149	WTvsKO_0h	No
cg28918686_TC11	chr10	101081778	101081780	CG	PMDsoloWCGW	FALSE	-								0.683866	0.813704	0.738147	0.745239	0.364149	0.300412	0.480355	0.381638	0.3636	2.2908	2.48573e-08	6.10319e-07	0.887016	0.900564	0.912293	0.899958	0.834745	0.825139	0.81519	0.825025	0.074933	0.938132	0.000109898	0.000790273	WTvsKO_0h	No
cg28919022_BC21	chr10	101175333	101175335	CG	PMDsoloWCGW	FALSE	-								0.593381	0.702312	0.615407	0.637033	0.238413	0.222289	0.3844	0.281701	0.355333	2.20784	3.12544e-08	7.08887e-07	0.886569	0.867865	0.893023	0.882486	0.730042	0.702434	0.767996	0.733491	0.148995	1.44731	9.17739e-06	0.0002276	WTvsKO_0h	No
cg28919112_TC11	chr10	101197309	101197311	CG	PMDsoloWCGW	FALSE	-								0.643635	0.794321	0.696144	0.711366	0.236826	0.205969	0.359939	0.267578	0.443789	2.82121	1.03765e-09	8.56636e-08	0.89808	0.92199	0.902694	0.907588	0.78748	0.75658	0.792402	0.778821	0.128767	1.48597	5.16239e-06	0.000185695	WTvsKO_0h	No
cg28919557_TC11	chr10	101314246	101314248	CG	Adenoma	FALSE	-								0.623571	0.737229	0.678824	0.679875	0.305856	0.283959	0.374247	0.321354	0.358521	2.18484	3.95328e-09	1.87418e-07	0.876893	0.899252	0.900377	0.892174	0.794897	0.767208	0.753035	0.771713	0.120461	1.29434	1.3293e-05	0.000264383	WTvsKO_0h	No
cg28919600_BC21	chr10	101325988	101325990	CG	PMDsoloWCGW	FALSE	+								0.56131	0.676436	0.566693	0.60148	0.223607	0.20229	0.296701	0.240866	0.360613	2.27569	3.50305e-09	1.74344e-07	0.842972	0.839732	0.850928	0.844544	0.711674	0.670549	0.691861	0.691361	0.153183	1.27708	3.92281e-06	0.000172164	WTvsKO_0h	No
cg28919884_BC21	chr10	101380841	101380843	CG	PMDsoloWCGW	FALSE	+								0.570443	0.705369	0.615396	0.630402	0.291111	0.229032	0.356509	0.292217	0.338185	2.07798	3.52043e-08	7.68474e-07	0.818654	0.780434	0.832154	0.810414	0.728057	0.702721	0.725789	0.718856	0.0915585	0.749234	0.000901487	0.00302733	WTvsKO_0h	No
cg28920002_TC21	chr10	101411888	101411890	CG	PMDsoloWCGW	FALSE	-								0.534589	0.614895	0.551466	0.566983	0.154281	0.146419	0.275678	0.192126	0.374858	2.52159	2.15784e-09	1.29822e-07	0.783829	0.791093	0.775981	0.783635	0.595058	0.580204	0.646347	0.607203	0.176432	1.22653	1.23378e-05	0.000255989	WTvsKO_0h	No
cg28920030_TC11	chr10	101416049	101416051	CG	Random	FALSE	+								0.560845	0.734661	0.641495	0.645667	0.281327	0.22569	0.36834	0.291786	0.353881	2.19044	5.03095e-08	9.75924e-07	0.850207	0.880179	0.849776	0.860054	0.754076	0.639081	0.686392	0.693183	0.166871	1.43694	6.58272e-05	0.000589529	WTvsKO_0h	No
cg28920030_TO11	chr10	101416049	101416051	CG	Random	FALSE	-								0.550752	0.61533	0.59596	0.587347	0.213515	0.207608	0.315864	0.245662	0.341685	2.15359	5.56532e-09	2.32714e-07	0.729862	0.726002	0.715221	0.723695	0.623848	0.577695	0.607323	0.602955	0.12074	0.785753	0.000189682	0.00110052	WTvsKO_0h	No
cg28920030_TO21	chr10	101416049	101416051	CG	Random	FALSE	-								0.513682	0.657211	0.580454	0.583782	0.226754	0.19367	0.28354	0.234655	0.349127	2.21709	6.15979e-09	2.48158e-07	0.782252	0.776702	0.799191	0.786048	0.639754	0.608266	0.625967	0.624662	0.161386	1.14327	8.71061e-06	0.000223045	WTvsKO_0h	No
cg28920277_TC21	chr10	101465519	101465521	CG	PMDsoloWCGW	FALSE	+								0.547973	0.632245	0.579781	0.586666	0.143358	0.118985	0.18015	0.147498	0.439169	3.05914	3.69033e-12	2.55699e-09	0.806488	0.780346	0.779253	0.788696	0.538925	0.469648	0.564646	0.524407	0.264289	1.76098	2.05283e-06	0.000145547	WTvsKO_0h	No
cg28921096_TC21	chr10	101649051	101649053	CG	PMDsoloWCGW	FALSE	+								0.652295	0.678744	0.663427	0.664822	0.253082	0.210522	0.329368	0.264324	0.400499	2.48664	2.53296e-10	3.86205e-08	0.828101	0.822678	0.83286	0.82788	0.705978	0.646783	0.732165	0.694975	0.132905	1.07066	9.79376e-05	0.000738617	WTvsKO_0h	No
cg28921249_BC21	chr10	101681767	101681769	CG	TSS;chr10:101681486;Mgat4c;ENSMUST00000179929;+281;2,TSS;chr10:101681625;Mgat4c;ENSMUST00000219195;+142;2,TSS;chr10:101681640;Mgat4c;ENSMUST00000127504;+127;2,TSS;chr10:101681745;Mgat4c;ENSMUST00000156751;+22;1	FALSE	+	Mgat4c	Mgat4c;Mgat4c;Mgat4c;Mgat4c;Mgat4c;Mgat4c	protein_coding;protein_coding;protein_coding;protein_coding;protein_coding;protein_coding	ENSMUST00000127504.8;ENSMUST00000134930.7;ENSMUST00000146230.7;ENSMUST00000156751.7;ENSMUST00000179929.7;ENSMUST00000219195.1	127;127;281;22;281;142			0.64637	0.721496	0.643021	0.670296	0.298383	0.276581	0.366354	0.313773	0.356523	2.16784	2.63484e-09	1.46254e-07	0.825888	0.822361	0.823029	0.82376	0.710442	0.679594	0.643839	0.677958	0.145801	1.14679	2.13474e-05	0.000327758	WTvsKO_0h	No
cg28921250_TC21	chr10	101681773	101681775	CG	TSS;chr10:101681745;Mgat4c;ENSMUST00000156751;+28;2	FALSE	-	Mgat4c	Mgat4c;Mgat4c;Mgat4c;Mgat4c;Mgat4c;Mgat4c	protein_coding;protein_coding;protein_coding;protein_coding;protein_coding;protein_coding	ENSMUST00000127504.8;ENSMUST00000134930.7;ENSMUST00000146230.7;ENSMUST00000156751.7;ENSMUST00000179929.7;ENSMUST00000219195.1	133;133;287;28;287;148			0.662888	0.753526	0.691457	0.702624	0.286704	0.234916	0.377294	0.299638	0.402986	2.49774	9.44461e-10	8.07609e-08	0.840413	0.835182	0.857177	0.844257	0.714235	0.716614	0.684825	0.705225	0.139032	1.18125	9.81815e-06	0.000234005	WTvsKO_0h	No
cg28921349_BC11	chr10	101708050	101708052	CG	Random	FALSE	-	Mgat4c	Mgat4c;Mgat4c;Mgat4c;Mgat4c;Mgat4c;Mgat4c	protein_coding;protein_coding;protein_coding;protein_coding;protein_coding;protein_coding	ENSMUST00000127504.8;ENSMUST00000134930.7;ENSMUST00000146230.7;ENSMUST00000156751.7;ENSMUST00000179929.7;ENSMUST00000219195.1	26410;26410;26564;26305;26564;26425			0.604992	0.724851	0.695829	0.675224	0.257246	0.219215	0.365232	0.280564	0.39466	2.45536	2.90178e-09	1.55473e-07	0.886729	0.869529	0.857962	0.871407	0.728669	0.687108	0.76366	0.726479	0.144928	1.34924	2.52189e-05	0.000354786	WTvsKO_0h	No
cg28921353_TC21	chr10	101708853	101708855	CG	Random	FALSE	-	Mgat4c	Mgat4c;Mgat4c;Mgat4c;Mgat4c;Mgat4c;Mgat4c	protein_coding;protein_coding;protein_coding;protein_coding;protein_coding;protein_coding	ENSMUST00000127504.8;ENSMUST00000134930.7;ENSMUST00000146230.7;ENSMUST00000156751.7;ENSMUST00000179929.7;ENSMUST00000219195.1	27213;27213;27367;27108;27367;27228			0.458369	0.524472	0.461312	0.481384	0.116959	0.0942637	0.191406	0.134209	0.347175	2.64547	5.74423e-10	6.08723e-08	0.693287	0.678161	0.692455	0.687968	0.382193	0.357305	0.455373	0.398291	0.289677	1.74028	2.12832e-06	0.000146495	WTvsKO_0h	No
cg28921645_TC21	chr10	101773134	101773136	CG	miRNA;chr10:101772692;Mir3059;ENSMUST00000175211;443;1	FALSE	+	Mgat4c	Mgat4c;Mgat4c;Mgat4c;Mgat4c;Mgat4c;Mgat4c	protein_coding;protein_coding;protein_coding;protein_coding;protein_coding;protein_coding	ENSMUST00000127504.8;ENSMUST00000134930.7;ENSMUST00000146230.7;ENSMUST00000156751.7;ENSMUST00000179929.7;ENSMUST00000219195.1	91494;91494;91648;91389;91648;91509			0.639415	0.747217	0.705328	0.69732	0.321508	0.298308	0.452911	0.357575	0.339745	2.07777	3.87871e-08	8.19868e-07	0.852349	0.864768	0.828584	0.848567	0.77355	0.733462	0.803788	0.770266	0.0783002	0.737395	0.00245845	0.00607162	WTvsKO_0h	No
cg28921994_BC21	chr10	101854179	101854181	CG	PMDsoloWCGW	FALSE	+	Mgat4c	Mgat4c;Mgat4c;Mgat4c;Mgat4c;Mgat4c;Mgat4c	protein_coding;protein_coding;protein_coding;protein_coding;protein_coding;protein_coding	ENSMUST00000127504.8;ENSMUST00000134930.7;ENSMUST00000146230.7;ENSMUST00000156751.7;ENSMUST00000179929.7;ENSMUST00000219195.1	172539;172539;172693;172434;172693;172554			0.536677	0.663508	0.577617	0.592601	0.232721	0.185615	0.29748	0.238605	0.353995	2.24581	6.73699e-09	2.63408e-07	0.820647	0.843858	0.855105	0.83987	0.661544	0.619693	0.660512	0.64725	0.19262	1.51923	2.57024e-06	0.000153497	WTvsKO_0h	No
cg28922165_TC21	chr10	101892390	101892392	CG	PMDsoloWCGW	FALSE	+	Mgat4c	Mgat4c;Mgat4c;Mgat4c;Mgat4c;Mgat4c;Mgat4c	protein_coding;protein_coding;protein_coding;protein_coding;protein_coding;protein_coding	ENSMUST00000127504.8;ENSMUST00000134930.7;ENSMUST00000146230.7;ENSMUST00000156751.7;ENSMUST00000179929.7;ENSMUST00000219195.1	210750;210750;210904;210645;210904;210765			0.496012	0.599404	0.543536	0.546317	0.155866	0.144632	0.266224	0.188908	0.35741	2.42475	3.83666e-09	1.84479e-07	0.752124	0.773966	0.773114	0.766401	0.571626	0.560849	0.637289	0.589921	0.17648	1.18786	2.90997e-05	0.000381207	WTvsKO_0h	No
cg28922527_BC21	chr10	101969612	101969614	CG	PMDsoloWCGW	FALSE	+	Mgat4c	Mgat4c;Mgat4c;Mgat4c;Mgat4c;Mgat4c;Mgat4c	protein_coding;protein_coding;protein_coding;protein_coding;protein_coding;protein_coding	ENSMUST00000127504.8;ENSMUST00000134930.7;ENSMUST00000146230.7;ENSMUST00000156751.7;ENSMUST00000179929.7;ENSMUST00000219195.1	287972;287972;288126;287867;288126;287987			0.636357	0.641874	0.661607	0.646612	0.306102	0.225833	0.352448	0.294794	0.351818	2.1507	4.21261e-09	1.9556e-07	0.78685	0.829513	0.801071	0.805811	0.683667	0.650558	0.667211	0.667145	0.138666	1.05483	4.67639e-05	0.000488238	WTvsKO_0h	No
cg28922529_BC11	chr10	101969690	101969692	CG	Random	FALSE	+	Mgat4c	Mgat4c;Mgat4c;Mgat4c;Mgat4c;Mgat4c;Mgat4c	protein_coding;protein_coding;protein_coding;protein_coding;protein_coding;protein_coding	ENSMUST00000127504.8;ENSMUST00000134930.7;ENSMUST00000146230.7;ENSMUST00000156751.7;ENSMUST00000179929.7;ENSMUST00000219195.1	288050;288050;288204;287945;288204;288065			0.44558	0.733298	0.57292	0.583933	0.182719	0.13821	0.191151	0.170693	0.413239	2.81685	4.43718e-09	2.01368e-07	0.772705	0.862188	0.77915	0.804681	0.591571	0.586504	0.567639	0.581905	0.222777	1.59934	4.75243e-05	0.00049267	WTvsKO_0h	No
cg28922533_BC11	chr10	101970349	101970351	CG	PMDsoloWCGW	FALSE	+	Mgat4c	Mgat4c;Mgat4c;Mgat4c;Mgat4c;Mgat4c;Mgat4c	protein_coding;protein_coding;protein_coding;protein_coding;protein_coding;protein_coding	ENSMUST00000127504.8;ENSMUST00000134930.7;ENSMUST00000146230.7;ENSMUST00000156751.7;ENSMUST00000179929.7;ENSMUST00000219195.1	288709;288709;288863;288604;288863;288724			0.707881	0.7896	0.809353	0.768945	0.318406	0.317776	0.448401	0.361528	0.407417	2.58997	7.02466e-10	6.824e-08	0.88328	0.876031	0.887973	0.882428	0.817073	0.776968	0.735053	0.776365	0.106063	1.09851	0.000156285	0.000977547	WTvsKO_0h	No
cg28922644_TC21	chr10	101997921	101997923	CG	PMDsoloWCGW	FALSE	-	Mgat4c	Mgat4c;Mgat4c;Mgat4c;Mgat4c;Mgat4c;Mgat4c	protein_coding;protein_coding;protein_coding;protein_coding;protein_coding;protein_coding	ENSMUST00000127504.8;ENSMUST00000134930.7;ENSMUST00000146230.7;ENSMUST00000156751.7;ENSMUST00000179929.7;ENSMUST00000219195.1	316281;316281;316435;316176;316435;316296			0.526344	0.655328	0.588708	0.590127	0.214535	0.171472	0.286321	0.224109	0.366017	2.35303	3.62487e-09	1.78086e-07	0.818835	0.838715	0.826945	0.828165	0.693302	0.664527	0.675359	0.677729	0.150436	1.19727	5.90979e-06	0.000193982	WTvsKO_0h	No
cg28922740_TC11	chr10	102020950	102020952	CG	Random	FALSE	+	Mgat4c	Mgat4c;Mgat4c;Mgat4c;Mgat4c;Mgat4c	protein_coding;protein_coding;protein_coding;protein_coding;protein_coding	ENSMUST00000127504.8;ENSMUST00000134930.7;ENSMUST00000156751.7;ENSMUST00000179929.7;ENSMUST00000219195.1	339310;339310;339205;339464;339325			0.450351	0.62109	0.549409	0.540283	0.164579	0.122573	0.260425	0.182526	0.357758	2.46691	1.61292e-08	4.59362e-07	0.779165	0.817816	0.767871	0.788284	0.57293	0.533238	0.563224	0.556464	0.23182	1.57616	2.54195e-06	0.000152982	WTvsKO_0h	No
cg28922944_TC21	chr10	102073914	102073916	CG	GeneBody;Mgat4c;NM_001205098;inside_[5-UTR;intron_between_exon_3_and_4];splice=0	FALSE	-	Mgat4c	Mgat4c;Mgat4c;Mgat4c;Mgat4c;Mgat4c	protein_coding;protein_coding;protein_coding;protein_coding;protein_coding	ENSMUST00000127504.8;ENSMUST00000134930.7;ENSMUST00000156751.7;ENSMUST00000179929.7;ENSMUST00000219195.1	392274;392274;392169;392428;392289			0.634357	0.746406	0.64958	0.676781	0.317896	0.280556	0.405776	0.334743	0.342038	2.08436	2.27509e-08	5.75897e-07	0.87571	0.842277	0.845327	0.854438	0.782869	0.772433	0.762452	0.772585	0.0818533	0.796061	0.00042651	0.00184676	WTvsKO_0h	No
cg28923044_BC21	chr10	102101724	102101726	CG	PMDsoloWCGW	FALSE	-	Mgat4c	Mgat4c;Mgat4c;Mgat4c;Mgat4c;Mgat4c	protein_coding;protein_coding;protein_coding;protein_coding;protein_coding	ENSMUST00000127504.8;ENSMUST00000134930.7;ENSMUST00000156751.7;ENSMUST00000179929.7;ENSMUST00000219195.1	420084;420084;419979;420238;420099			0.574762	0.692408	0.619079	0.62875	0.217142	0.175315	0.27909	0.223849	0.404901	2.58634	3.96041e-10	4.97612e-08	0.814981	0.854643	0.872419	0.847347	0.639049	0.574836	0.681372	0.631752	0.215595	1.7042	1.86706e-05	0.00030701	WTvsKO_0h	No
cg28923099_TC21	chr10	102109615	102109617	CG	PMDsoloWCGW	FALSE	+	Mgat4c	Mgat4c;Mgat4c;Mgat4c;Mgat4c;Mgat4c	protein_coding;protein_coding;protein_coding;protein_coding;protein_coding	ENSMUST00000127504.8;ENSMUST00000134930.7;ENSMUST00000156751.7;ENSMUST00000179929.7;ENSMUST00000219195.1	427975;427975;427870;428129;427990			0.52044	0.646499	0.540093	0.569011	0.174562	0.142721	0.229373	0.182219	0.386792	2.59905	4.158e-10	5.10487e-08	0.798305	0.82362	0.837362	0.819762	0.591473	0.540966	0.579569	0.570669	0.249093	1.77944	7.29216e-07	0.000127929	WTvsKO_0h	No
cg28923191_BC21	chr10	102129491	102129493	CG	PMDsoloWCGW	FALSE	+	Mgat4c	Mgat4c;Mgat4c;Mgat4c;Mgat4c;Mgat4c	protein_coding;protein_coding;protein_coding;protein_coding;protein_coding	ENSMUST00000127504.8;ENSMUST00000134930.7;ENSMUST00000156751.7;ENSMUST00000179929.7;ENSMUST00000219195.1	447851;447851;447746;448005;447866			0.641305	0.749745	0.713877	0.701642	0.306995	0.284511	0.410859	0.334122	0.367521	2.25512	4.98061e-09	2.16304e-07	0.880344	0.871355	0.870797	0.874166	0.803882	0.751811	0.755911	0.770535	0.103631	1.04225	6.81987e-05	0.000601203	WTvsKO_0h	No
cg28923201_TC11	chr10	102131379	102131381	CG	Random	FALSE	-	Mgat4c	Mgat4c;Mgat4c;Mgat4c;Mgat4c;Mgat4c	protein_coding;protein_coding;protein_coding;protein_coding;protein_coding	ENSMUST00000127504.8;ENSMUST00000134930.7;ENSMUST00000156751.7;ENSMUST00000179929.7;ENSMUST00000219195.1	449739;449739;449634;449893;449754			0.723356	0.814102	0.786821	0.77476	0.438408	0.362129	0.50504	0.435192	0.339567	2.18209	8.60811e-09	3.06224e-07	0.923363	0.885603	0.914997	0.907988	0.890342	0.817919	0.805606	0.837956	0.0700321	0.910587	0.00726847	0.0135584	WTvsKO_0h	No
cg28923350_TC11	chr10	102158776	102158778	CG	TSS;chr10:102158857;Mgat4c;ENSMUST00000138522-ENSMUST00000163753;-81;2,TSS;chr10:102158888;Mgat4c;ENSMUST00000138016;-112;2	FALSE	-	Mgat4c	Mgat4c;Mgat4c;Mgat4c;Mgat4c;Mgat4c;Mgat4c;Mgat4c;Mgat4c;Mgat4c;Mgat4c;Mgat4c;Mgat4c;Mgat4c	protein_coding;protein_coding;protein_coding;protein_coding;protein_coding;protein_coding;protein_coding;protein_coding;protein_coding;protein_coding;protein_coding;protein_coding;protein_coding	ENSMUST00000020039.12;ENSMUST00000127504.8;ENSMUST00000130580.2;ENSMUST00000134930.7;ENSMUST00000138016.7;ENSMUST00000138522.7;ENSMUST00000143640.1;ENSMUST00000156751.7;ENSMUST00000163753.7;ENSMUST00000179929.7;ENSMUST00000218554.1;ENSMUST00000219195.1;ENSMUST00000219683.1	-302;477136;-101;477136;-112;-81;-128;477031;-81;477290;-128;477151;-128			0.778147	0.854501	0.792714	0.808454	0.465556	0.405204	0.519758	0.463506	0.344948	2.31281	1.87841e-09	1.19313e-07	0.906596	0.917184	0.918277	0.914019	0.816354	0.774606	0.796198	0.79572	0.118299	1.44633	3.00798e-06	0.000159932	WTvsKO_0h	No
cg28923519_BC11	chr10	102191092	102191094	CG	PMDsoloWCGW	FALSE	+	Mgat4c	Mgat4c;Mgat4c;Mgat4c;Mgat4c;Mgat4c;Mgat4c;Mgat4c;Mgat4c;Mgat4c;Mgat4c;Mgat4c;Mgat4c;Mgat4c	protein_coding;protein_coding;protein_coding;protein_coding;protein_coding;protein_coding;protein_coding;protein_coding;protein_coding;protein_coding;protein_coding;protein_coding;protein_coding	ENSMUST00000020039.12;ENSMUST00000127504.8;ENSMUST00000130580.2;ENSMUST00000134930.7;ENSMUST00000138016.7;ENSMUST00000138522.7;ENSMUST00000143640.1;ENSMUST00000156751.7;ENSMUST00000163753.7;ENSMUST00000179929.7;ENSMUST00000218554.1;ENSMUST00000219195.1;ENSMUST00000219683.1	32014;509452;32215;509452;32204;32235;32188;509347;32235;509606;32188;509467;32188			0.413634	0.551161	0.467818	0.477538	0.123662	0.0719627	0.169213	0.121613	0.355925	2.80548	1.15642e-09	9.02536e-08	0.748723	0.777088	0.802038	0.77595	0.527939	0.444442	0.53	0.500794	0.275156	1.79414	3.18662e-06	0.000162326	WTvsKO_0h	No
cg28924699_TC21	chr10	102449367	102449369	CG	Adenoma	FALSE	+								0.558847	0.645456	0.547036	0.58378	0.176478	0.172024	0.263919	0.204141	0.379639	2.48227	6.72354e-10	6.65008e-08	0.779291	0.802678	0.774932	0.785634	0.50339	0.499443	0.535743	0.512859	0.272775	1.80168	2.5286e-07	0.000110785	WTvsKO_0h	No
cg28924770_BC21	chr10	102461080	102461082	CG	PseudogeneTSS;chr10:102460198;Gm26988;ENSMUST00000183296;883	FALSE	-	Gm26988	Gm26988	processed_pseudogene	ENSMUST00000183296.1	883			0.595513	0.679661	0.624109	0.633094	0.231143	0.219903	0.347656	0.266234	0.36686	2.28114	4.06943e-09	1.91052e-07	0.80044	0.81173	0.828613	0.813594	0.691905	0.683011	0.720397	0.698438	0.115156	0.915169	9.041e-05	0.000706691	WTvsKO_0h	No
cg28924883_TC21	chr10	102482746	102482748	CG	GeneBody;Nts;NM_024435;inside_[intron_between_exon_3_and_4];splice=0	FALSE	+	Nts	Nts	protein_coding	ENSMUST00000020040.4	7740			0.599181	0.681062	0.65786	0.646034	0.224067	0.188877	0.363476	0.258806	0.387228	2.44019	5.86116e-09	2.40277e-07	0.797781	0.804955	0.815324	0.80602	0.635608	0.572717	0.686486	0.631604	0.174416	1.27052	5.75158e-05	0.000545623	WTvsKO_0h	No
cg28924928_BC21	chr10	102490977	102490979	CG	TSS;chr10:102490485;Nts;ENSMUST00000020040;-492;2	FALSE	-	Nts	Nts	protein_coding	ENSMUST00000020040.4	-491			0.550884	0.679287	0.57402	0.601397	0.239183	0.193818	0.270987	0.234663	0.366735	2.32043	1.90324e-09	1.2032e-07	0.830179	0.853184	0.865851	0.849738	0.656622	0.62809	0.7079	0.664204	0.185534	1.51672	9.23464e-06	0.000228097	WTvsKO_0h	No
cg28925244_TC11	chr10	102541594	102541596	CG	Random	FALSE	+	Rassf9	Rassf9;Rassf9	protein_coding;protein_coding	ENSMUST00000055355.5;ENSMUST00000219445.1	1347;29373			0.41093	0.632817	0.532322	0.525356	0.164196	0.165295	0.235957	0.188483	0.336873	2.27721	2.60597e-08	6.28849e-07	0.754439	0.807323	0.793267	0.78501	0.607903	0.530022	0.600543	0.579489	0.205521	1.41067	1.89767e-05	0.000309315	WTvsKO_0h	No
cg28926545_BC21	chr10	102791365	102791367	CG	PMDsoloWCGW	FALSE	-								0.621611	0.678183	0.645757	0.648517	0.238161	0.235326	0.376164	0.283217	0.3653	2.25512	5.51141e-09	2.31351e-07	0.829892	0.815434	0.807223	0.817517	0.699374	0.694388	0.720163	0.704642	0.112875	0.910023	5.91538e-05	0.000554642	WTvsKO_0h	No
cg28927373_TC11	chr10	102951291	102951293	CG	PMDsoloWCGW	FALSE	+								0.709973	0.790803	0.746258	0.749011	0.384379	0.344959	0.456768	0.395369	0.353643	2.20704	2.61447e-09	1.4547e-07	0.883951	0.872339	0.868794	0.875028	0.780731	0.765105	0.772089	0.772642	0.102386	1.0443	1.57346e-05	0.00028473	WTvsKO_0h	No
cg28928256_BC11	chr10	103089515	103089517	CG	Random	FALSE	+	Lrriq1	Lrriq1	protein_coding	ENSMUST00000166240.7	146807			0.636259	0.731845	0.681918	0.683341	0.32887	0.204945	0.351697	0.295171	0.38817	2.40753	3.95042e-09	1.87316e-07	0.872721	0.900296	0.885684	0.886234	0.775751	0.748609	0.756116	0.760159	0.126075	1.30293	8.15607e-06	0.000217253	WTvsKO_0h	No
cg28928518_BC21	chr10	103138299	103138301	CG	GeneBody;Lrriq1;NM_001163559;inside_[intron_between_exon_22_and_23];splice=0	FALSE	+	Lrriq1	Lrriq1;Lrriq1	protein_coding;protein_coding	ENSMUST00000166240.7;ENSMUST00000217834.1	98023;8076			0.523189	0.57288	0.508213	0.534761	0.137398	0.112938	0.172121	0.140819	0.393942	2.83158	1.30883e-11	6.61415e-09	0.726027	0.793788	0.780422	0.766746	0.483455	0.478128	0.491784	0.484455	0.28229	1.81646	1.05454e-06	0.000132563	WTvsKO_0h	No
cg28930634_TC21	chr10	103505080	103505082	CG	Random	FALSE	+								0.565774	0.62942	0.560223	0.585139	0.236418	0.205434	0.265866	0.235906	0.349233	2.20117	9.20278e-10	7.95744e-08	0.792374	0.830194	0.794353	0.80564	0.624103	0.613163	0.612151	0.616472	0.189168	1.37233	3.95258e-06	0.00017237	WTvsKO_0h	No
cg28930756_BC21	chr10	103537362	103537364	CG	PMDsoloWCGW	FALSE	+	Gm47221;Gm47223	Gm47221;Gm47223	lincRNA;lincRNA	ENSMUST00000218784.1;ENSMUST00000219620.1	24435;30001			0.649875	0.804695	0.744544	0.733038	0.369546	0.302592	0.516191	0.39611	0.336928	2.12003	2.92655e-07	3.32031e-06	0.826769	0.872847	0.834587	0.844734	0.829432	0.747165	0.805114	0.793903	0.0508308	0.492458	0.0446668	0.0603996	WTvsKO_0h	No
cg28932698_TC21	chr10	103960305	103960307	CG	PMDsoloWCGW	FALSE	-								0.557823	0.71966	0.591185	0.622889	0.187173	0.143261	0.303664	0.211366	0.411523	2.70786	5.20384e-09	2.22815e-07	0.824416	0.842864	0.830624	0.832635	0.669498	0.624929	0.726434	0.67362	0.159014	1.26152	5.22761e-05	0.000517629	WTvsKO_0h	No
cg28932718_TC21	chr10	103964498	103964500	CG	PMDsoloWCGW	FALSE	+								0.524289	0.642784	0.579692	0.582255	0.158156	0.146875	0.282594	0.195875	0.38638	2.58203	2.61762e-09	1.45576e-07	0.767718	0.755021	0.787203	0.769981	0.600128	0.54175	0.657922	0.599933	0.170048	1.155	0.000138913	0.000909561	WTvsKO_0h	No
cg28932724_TC11	chr10	103967543	103967545	CG	Random	FALSE	-								0.545155	0.562644	0.499312	0.535704	0.115142	0.0885363	0.159676	0.121118	0.414586	3.10747	6.53898e-12	4.04765e-09	0.735318	0.782708	0.762976	0.760334	0.397925	0.431378	0.480642	0.436648	0.323686	2.0391	5.22676e-07	0.000123618	WTvsKO_0h	No
cg28932734_TC21	chr10	103970984	103970986	CG	Random	FALSE	+								0.486619	0.575732	0.5333	0.531884	0.161909	0.145717	0.223119	0.176915	0.354969	2.42633	4.77944e-10	5.49507e-08	0.78914	0.800808	0.770028	0.786659	0.555155	0.530283	0.608173	0.564537	0.222122	1.50864	4.11683e-06	0.000174225	WTvsKO_0h	No
cg28933193_TC21	chr10	104082262	104082264	CG	PseudogeneTSS;chr10:104082225;Gm47227;ENSMUST00000217869;38	FALSE	-	Gm47227	Gm47227	processed_pseudogene	ENSMUST00000217869.1	38			0.479976	0.565358	0.449579	0.498304	0.116722	0.119052	0.15979	0.131855	0.366449	2.72453	4.51093e-11	1.51211e-08	0.732687	0.783966	0.809134	0.775262	0.491758	0.490424	0.507821	0.496668	0.278595	1.81857	1.74967e-06	0.000141707	WTvsKO_0h	No
cg28933318_BC21	chr10	104114652	104114654	CG	PMDsoloWCGW	FALSE	-								0.626767	0.672986	0.638096	0.645949	0.23231	0.207245	0.336516	0.258691	0.387259	2.41554	8.87418e-10	7.7841e-08	0.813193	0.831486	0.828145	0.824275	0.665361	0.628529	0.69121	0.6617	0.162575	1.26027	1.02199e-05	0.000238063	WTvsKO_0h	No
cg28933377_TC21	chr10	104127861	104127863	CG	PMDsoloWCGW	FALSE	-								0.531173	0.611245	0.543791	0.56207	0.211161	0.180267	0.292259	0.227895	0.334175	2.14959	7.77199e-09	2.87889e-07	0.763066	0.779306	0.785855	0.776076	0.600781	0.569442	0.650301	0.606842	0.169234	1.16505	3.32096e-05	0.000407125	WTvsKO_0h	No
cg28933817_TC21	chr10	104283444	104283446	CG	PMDsoloWCGW	FALSE	-								0.490032	0.601917	0.559943	0.550631	0.178109	0.163385	0.24795	0.196481	0.35415	2.34994	1.38487e-09	1.00446e-07	0.788668	0.809947	0.778518	0.792378	0.591082	0.589974	0.627323	0.602793	0.189585	1.33237	4.28863e-06	0.000175785	WTvsKO_0h	No
cg28933878_TC21	chr10	104299477	104299479	CG	PMDsoloWCGW	FALSE	+								0.660634	0.737968	0.658469	0.68569	0.305744	0.270105	0.435167	0.337005	0.348685	2.13183	2.48433e-08	6.10092e-07	0.871022	0.827609	0.856622	0.851751	0.779736	0.728886	0.761629	0.75675	0.0950007	0.89042	0.000491801	0.00202715	WTvsKO_0h	No
cg28934551_BC21	chr10	104459566	104459568	CG	PMDsoloWCGW	FALSE	+								0.515468	0.582925	0.541888	0.54676	0.17367	0.141898	0.308136	0.207901	0.338859	2.27606	3.19774e-08	7.20033e-07	0.748867	0.78449	0.754768	0.762708	0.526776	0.472591	0.561968	0.520445	0.242263	1.56879	4.64443e-06	0.000179427	WTvsKO_0h	No
cg28935776_TC21	chr10	104717367	104717369	CG	PMDsoloWCGW	FALSE	+								0.532474	0.590108	0.546702	0.556428	0.107166	0.0766186	0.197196	0.126994	0.429434	3.2196	9.04227e-11	2.22203e-08	0.735817	0.769693	0.787889	0.764466	0.444271	0.440118	0.527416	0.470602	0.293864	1.8745	2.05095e-06	0.000145547	WTvsKO_0h	No
cg28935930_BC21	chr10	104756775	104756777	CG	PMDsoloWCGW	FALSE	+								0.67775	0.731692	0.622787	0.677409	0.298198	0.255804	0.390218	0.31474	0.362669	2.22091	7.2129e-09	2.74657e-07	0.822322	0.830723	0.835979	0.829675	0.726427	0.718637	0.756696	0.73392	0.0957549	0.818779	0.000161406	0.000996727	WTvsKO_0h	No
cg28936328_TC21	chr10	104848820	104848822	CG	PMDsoloWCGW	FALSE	-								0.585911	0.711508	0.621907	0.639775	0.295798	0.234626	0.366291	0.298905	0.34087	2.08969	2.95893e-08	6.84554e-07	0.856653	0.863711	0.871734	0.864033	0.762219	0.716705	0.729417	0.736113	0.127919	1.18584	1.24712e-05	0.000257182	WTvsKO_0h	No
cg28946119_TC21	chr10	106293146	106293148	CG	Random	FALSE	+								0.609954	0.664511	0.598646	0.62437	0.228302	0.164289	0.246097	0.212896	0.411474	2.64231	7.41923e-11	1.99182e-08	0.777603	0.797632	0.820577	0.798604	0.585104	0.596717	0.591596	0.591139	0.207465	1.4607	2.09322e-06	0.000146139	WTvsKO_0h	No
cg28946191_TC21	chr10	106308176	106308178	CG	PMDsoloWCGW	FALSE	-								0.676181	0.722401	0.652424	0.683669	0.289849	0.272254	0.412978	0.325027	0.358642	2.18972	6.71582e-09	2.62895e-07	0.826583	0.854921	0.860171	0.847225	0.689336	0.674024	0.754407	0.705922	0.141303	1.20529	8.58865e-05	0.000685363	WTvsKO_0h	No
cg28946493_BC11	chr10	106373672	106373674	CG	PMDsoloWCGW	FALSE	-								0.580924	0.760098	0.729605	0.690209	0.342429	0.260881	0.404398	0.335903	0.354306	2.18975	7.44481e-08	1.27364e-06	0.861711	0.913575	0.907881	0.894389	0.802852	0.728334	0.795256	0.775481	0.118909	1.31208	0.000300981	0.00147406	WTvsKO_0h	No
cg28946513_TC21	chr10	106376454	106376456	CG	PMDsoloWCGW	FALSE	+								0.481862	0.594615	0.550643	0.542373	0.139671	0.129732	0.210747	0.16005	0.382323	2.67165	1.93816e-10	3.3199e-08	0.760259	0.7761	0.804793	0.780384	0.531954	0.472896	0.575326	0.526725	0.253659	1.67864	5.29738e-06	0.000187479	WTvsKO_0h	No
cg28946802_TC11	chr10	106428440	106428442	CG	MonoallelicMeth	FALSE	-								0.393722	0.566184	0.492104	0.484003	0.139165	0.120186	0.188916	0.149422	0.334581	2.4396	2.40895e-09	1.38574e-07	0.738064	0.783292	0.772594	0.76465	0.604736	0.534959	0.616037	0.585244	0.179406	1.20505	5.02951e-05	0.000506929	WTvsKO_0h	No
cg28947327_BC11	chr10	106503785	106503787	CG	PseudogeneTSS;chr10:106502737;Olfr1556-ps1;ENSMUST00000204688;1049	FALSE	-	Ppfia2	Ppfia2;Ppfia2;Ppfia2	protein_coding;protein_coding;protein_coding	ENSMUST00000029404.16;ENSMUST00000169303.2;ENSMUST00000217854.1	33447;33446;33440			0.649532	0.703785	0.694411	0.682576	0.273619	0.243133	0.308741	0.275164	0.407412	2.51083	5.99558e-11	1.77197e-08	0.875906	0.892861	0.894897	0.887888	0.708189	0.610319	0.691821	0.67011	0.217778	1.95841	1.70396e-06	0.000141264	WTvsKO_0h	No
cg28947719_BC21	chr10	106584024	106584026	CG	Adenoma	FALSE	-	4930532I03Rik;Ppfia2	4930532I03Rik;4930532I03Rik;Ppfia2;Ppfia2;Ppfia2	antisense;antisense;protein_coding;protein_coding;protein_coding	ENSMUST00000218463.1;ENSMUST00000219229.1;ENSMUST00000029404.16;ENSMUST00000169303.2;ENSMUST00000217854.1	18456;17036;113686;113685;113679			0.662686	0.780078	0.680045	0.707603	0.349767	0.333137	0.396319	0.359741	0.347862	2.13053	7.23025e-09	2.75037e-07	0.898065	0.859762	0.874203	0.877343	0.798737	0.757561	0.769205	0.775167	0.102176	1.06099	0.00013529	0.000894585	WTvsKO_0h	No
cg28949425_BC21	chr10	106906369	106906371	CG	EPIC;cg22056007	FALSE	-	Ppfia2	Ppfia2;Ppfia2;Ppfia2	protein_coding;protein_coding;protein_coding	ENSMUST00000029404.16;ENSMUST00000217854.1;ENSMUST00000219024.1	436031;436024;13364			0.578352	0.664195	0.627658	0.623402	0.219749	0.190982	0.329632	0.246788	0.376614	2.37605	2.91938e-09	1.56078e-07	0.80795	0.80317	0.783248	0.798123	0.673577	0.596692	0.666202	0.64549	0.152633	1.11593	6.2011e-05	0.000570169	WTvsKO_0h	No
cg28949692_TC21	chr10	106949403	106949405	CG	PseudogeneTSS;chr10:106949297;Gm19007;ENSMUST00000217746;107	FALSE	-	Acss3;Gm19007	Acss3;Gm19007	protein_coding;processed_pseudogene	ENSMUST00000165067.8;ENSMUST00000217746.1	174180;107			0.500825	0.599785	0.528605	0.543072	0.18826	0.164856	0.236194	0.196437	0.346635	2.29868	1.02457e-09	8.49708e-08	0.753796	0.79381	0.758306	0.768638	0.586706	0.542718	0.575025	0.56815	0.200488	1.33997	6.22073e-06	0.000197493	WTvsKO_0h	No
cg28950146_TC21	chr10	107031738	107031740	CG	GeneBody;Acss3;NM_001142804;inside_[intron_between_exon_5_and_6];splice=0	FALSE	-	Acss3	Acss3;Acss3	protein_coding;protein_coding	ENSMUST00000044668.4;ENSMUST00000165067.8	91930;91845			0.46556	0.626051	0.600368	0.563993	0.176715	0.163178	0.279042	0.206312	0.357681	2.35981	1.18643e-08	3.76186e-07	0.741396	0.753777	0.764954	0.753376	0.63837	0.61558	0.639566	0.631172	0.122204	0.836533	9.21998e-05	0.000714375	WTvsKO_0h	No
cg28952427_BC21	chr10	107402148	107402150	CG	PMDsoloWCGW	FALSE	+	Lin7a	Lin7a;Lin7a;Lin7a	protein_coding;protein_coding;protein_coding	ENSMUST00000020057.15;ENSMUST00000105280.4;ENSMUST00000218031.1	130463;130443;129755			0.572353	0.671292	0.596714	0.613453	0.26981	0.227962	0.330763	0.276178	0.337275	2.07626	9.89106e-09	3.35376e-07	0.819601	0.8237	0.81478	0.81936	0.720698	0.661105	0.702656	0.69482	0.124541	0.990897	6.06551e-05	0.000562954	WTvsKO_0h	No
cg28954626_TC21	chr10	107719720	107719722	CG	TSS;chr10:107720050;Ptprq;ENSMUST00000050702;+330;1	FALSE	+	Ptprq	Ptprq;Ptprq	protein_coding;protein_coding	ENSMUST00000050702.8;ENSMUST00000218399.1	331;307			0.581732	0.645121	0.609624	0.612159	0.209436	0.184572	0.287357	0.227122	0.385037	2.45043	4.04417e-10	5.0466e-08	0.806937	0.805737	0.819423	0.810699	0.590832	0.596325	0.619738	0.602298	0.208401	1.50002	6.8807e-07	0.000127457	WTvsKO_0h	No
cg28959315_TC21	chr10	108294687	108294689	CG	Enhancer	FALSE	+								0.0898913	0.170455	0.169414	0.143253	0.0531705	0.0582906	0.0518846	0.0544486	0.0888046	1.48125	6.22398e-06	3.1412e-05	0.606493	0.537542	0.632007	0.592014	0.277815	0.244353	0.18265	0.234939	0.357075	2.26343	2.56887e-06	0.000153486	WTvsKO_96h	No
cg28964744_BC21	chr10	108805383	108805385	CG	Random	FALSE	-	Syt1	Syt1;Syt1;Syt1	protein_coding;protein_coding;protein_coding	ENSMUST00000064054.13;ENSMUST00000105276.7;ENSMUST00000156979.1	205599;205592;203728			0.523929	0.653393	0.554041	0.577121	0.242473	0.193904	0.289562	0.24198	0.335141	2.11995	1.29159e-08	3.97207e-07	0.737171	0.767929	0.757621	0.75424	0.620304	0.595441	0.623625	0.613123	0.141117	0.954749	4.29305e-05	0.000466796	WTvsKO_0h	No
cg28970931_BC11	chr10	109816318	109816320	CG	Random	FALSE	+	Nav3	Nav3;Nav3;Nav3;Nav3	protein_coding;protein_coding;protein_coding;protein_coding	ENSMUST00000032719.14;ENSMUST00000161582.7;ENSMUST00000238286.1;ENSMUST00000239301.1	183901;7267;16903;639886			0.827939	0.923829	0.865631	0.872466	0.545719	0.450654	0.573366	0.523246	0.34922	2.71638	1.45984e-09	1.031e-07	0.960317	0.945683	0.959121	0.95504	0.933473	0.890542	0.89311	0.905708	0.0493318	1.12448	0.0007775	0.0027395	WTvsKO_0h	No
cg28986907_TC21	chr10	111543953	111543955	CG	Enhancer	FALSE	-								0.601893	0.655656	0.606712	0.621421	0.301296	0.244488	0.315221	0.287002	0.334419	2.03711	3.58531e-09	1.77176e-07	0.839317	0.852045	0.852834	0.848065	0.74444	0.714674	0.625844	0.694986	0.153079	1.27875	0.000111537	0.000797286	WTvsKO_0h	No
cg28991367_BC21	chr10	111974795	111974797	CG	GeneBody;Krr1;NM_178610;inside_[intron_between_exon_1_and_2];splice=0	FALSE	+	Krr1	Krr1;Krr1;Krr1;Krr1	protein_coding;protein_coding;protein_coding;protein_coding	ENSMUST00000075924.7;ENSMUST00000162678.1;ENSMUST00000163048.7;ENSMUST00000174653.1	2021;2039;2132;2003		Shore	0.534671	0.589246	0.594912	0.572943	0.145135	0.15365	0.246806	0.181864	0.391079	2.635	2.40153e-10	3.73853e-08	0.835469	0.819307	0.839347	0.831374	0.718189	0.696294	0.684057	0.699514	0.131861	1.0831	1.68711e-05	0.000293315	WTvsKO_0h	No
cg28998702_BC21	chr10	113078181	113078183	CG	Adenoma	FALSE	-								0.513292	0.602224	0.535481	0.550332	0.165046	0.144126	0.187405	0.165525	0.384807	2.63515	3.43748e-11	1.2647e-08	0.766011	0.7948	0.82206	0.79429	0.570599	0.510526	0.570899	0.550675	0.243615	1.66317	3.58103e-06	0.000168093	WTvsKO_0h	No
cg28998997_TC21	chr10	113136863	113136865	CG	PMDsoloWCGW	FALSE	-								0.616631	0.716157	0.649787	0.660859	0.286742	0.245283	0.388794	0.30694	0.353919	2.16713	1.27711e-08	3.94427e-07	0.811366	0.816163	0.822322	0.816617	0.70729	0.674804	0.717799	0.699964	0.116653	0.930928	5.73477e-05	0.000544848	WTvsKO_0h	No
cg28999138_TC21	chr10	113161770	113161772	CG	PMDsoloWCGW	FALSE	+								0.48149	0.568878	0.512292	0.520887	0.167978	0.137629	0.233767	0.179791	0.341096	2.34423	1.76393e-09	1.15323e-07	0.699395	0.740149	0.724871	0.721472	0.483755	0.448534	0.548486	0.493592	0.22788	1.41238	1.55916e-05	0.000283673	WTvsKO_0h	No
cg28999995_TC11	chr10	113340736	113340738	CG	Random	FALSE	+								0.686707	0.794818	0.728517	0.736681	0.293117	0.227252	0.384654	0.301674	0.435006	2.74118	4.50987e-10	5.32949e-08	0.854279	0.877	0.887874	0.873051	0.753913	0.72546	0.769923	0.749765	0.123286	1.20366	3.02077e-05	0.000388071	WTvsKO_0h	No
cg29000606_BC21	chr10	113455453	113455455	CG	PMDsoloWCGW	FALSE	+								0.609404	0.669681	0.650276	0.64312	0.217396	0.198497	0.304691	0.240195	0.402925	2.53601	2.19094e-10	3.55254e-08	0.80212	0.843804	0.755861	0.800595	0.592009	0.582776	0.651764	0.60885	0.191745	1.38656	9.57131e-05	0.000729344	WTvsKO_0h	No
cg29000750_TC21	chr10	113490034	113490036	CG	Adenoma	FALSE	-								0.705862	0.771105	0.697722	0.724896	0.33962	0.279267	0.413458	0.344115	0.380781	2.3512	1.47282e-09	1.03663e-07	0.83688	0.892132	0.860957	0.863323	0.725679	0.704515	0.742923	0.724372	0.138951	1.28316	6.03862e-05	0.000561535	WTvsKO_0h	No
cg29001389_BC11	chr10	113611350	113611352	CG	PMDsoloWCGW	FALSE	+								0.630102	0.797049	0.721081	0.716077	0.36271	0.270096	0.473359	0.368722	0.347356	2.17119	2.0339e-07	2.55454e-06	0.887992	0.905701	0.909047	0.900914	0.773454	0.742166	0.805207	0.773609	0.127305	1.4092	1.35758e-05	0.000267179	WTvsKO_0h	No
cg29001398_TC21	chr10	113613352	113613354	CG	PMDsoloWCGW	FALSE	-								0.585373	0.677052	0.614787	0.625738	0.223089	0.188971	0.298112	0.236724	0.389013	2.45901	6.53669e-10	6.54122e-08	0.84076	0.854492	0.868187	0.85448	0.65777	0.578574	0.699	0.645115	0.209365	1.6862	1.13173e-05	0.000247245	WTvsKO_0h	No
cg29001407_TC21	chr10	113614866	113614868	CG	Random	FALSE	-								0.650285	0.792492	0.673082	0.705286	0.330947	0.257815	0.409751	0.332838	0.372449	2.3125	1.9849e-08	5.25003e-07	0.858786	0.872437	0.865856	0.865693	0.769398	0.75313	0.742502	0.75501	0.110683	1.06443	1.5026e-05	0.000278891	WTvsKO_0h	No
cg29001493_TC21	chr10	113634822	113634824	CG	PMDsoloWCGW	FALSE	-								0.510389	0.649934	0.56507	0.575131	0.203109	0.19906	0.303228	0.235132	0.339998	2.17039	1.58285e-08	4.53766e-07	0.851555	0.832564	0.820946	0.835022	0.668844	0.647567	0.718077	0.678163	0.156859	1.26345	2.41754e-05	0.000347834	WTvsKO_0h	No
cg29002434_BC21	chr10	113838632	113838634	CG	PMDsoloWCGW	FALSE	-								0.529256	0.679071	0.563538	0.590622	0.242571	0.202511	0.316572	0.253885	0.336737	2.11647	3.24411e-08	7.26888e-07	0.778721	0.788842	0.774734	0.780766	0.646405	0.604467	0.647248	0.632707	0.148059	1.04695	2.2696e-05	0.00033743	WTvsKO_0h	No
cg29002448_BC21	chr10	113843553	113843555	CG	PMDsoloWCGW	FALSE	+								0.601867	0.681256	0.604047	0.629057	0.255849	0.20709	0.326239	0.263059	0.365997	2.27495	2.78372e-09	1.51445e-07	0.821381	0.844499	0.840093	0.835324	0.652257	0.608826	0.681075	0.647386	0.187938	1.46514	4.75785e-06	0.00018021	WTvsKO_0h	No
cg29003540_BC21	chr10	114072672	114072674	CG	PMDsoloWCGW	FALSE	-								0.50109	0.630089	0.548385	0.559855	0.165268	0.155771	0.25883	0.193289	0.366565	2.4491	2.12689e-09	1.28936e-07	0.799707	0.795776	0.7985	0.797994	0.60005	0.552078	0.611739	0.587956	0.210039	1.46777	1.80214e-06	0.000141929	WTvsKO_0h	No
cg29003622_BC21	chr10	114093917	114093919	CG	PMDsoloWCGW	FALSE	+								0.547335	0.630458	0.559899	0.579231	0.243354	0.181896	0.303164	0.242805	0.336426	2.13281	1.12393e-08	3.63222e-07	0.799159	0.804864	0.845573	0.816532	0.696268	0.690014	0.6703	0.685528	0.131005	1.03826	8.40891e-05	0.000677399	WTvsKO_0h	No
cg29005349_TC21	chr10	114449540	114449542	CG	PMDsoloWCGW	FALSE	-	Trhde	Trhde;Trhde	protein_coding;protein_coding	ENSMUST00000061632.8;ENSMUST00000239411.1	351830;352762			0.532494	0.640967	0.577547	0.583669	0.206548	0.201749	0.320597	0.242965	0.340705	2.1615	1.44229e-08	4.27945e-07	0.830889	0.830368	0.827367	0.829541	0.635078	0.607825	0.659584	0.634163	0.195379	1.48769	1.17807e-06	0.000134962	WTvsKO_0h	No
cg29005663_TC11	chr10	114503156	114503158	CG	Random	FALSE	+	Trhde	Trhde;Trhde	protein_coding;protein_coding	ENSMUST00000061632.8;ENSMUST00000239411.1	298214;299146			0.518401	0.685327	0.64487	0.616199	0.264776	0.241357	0.307611	0.271248	0.344951	2.12866	1.51187e-08	4.40621e-07	0.826096	0.869705	0.838932	0.844911	0.690054	0.698511	0.707045	0.698536	0.146375	1.24322	1.81684e-05	0.000302956	WTvsKO_0h	No
cg29011665_TC21	chr10	115249168	115249170	CG	Enhancer	FALSE	-	Tbc1d15	Tbc1d15;Tbc1d15	protein_coding;protein_coding	ENSMUST00000020339.9;ENSMUST00000219274.1	2299;2085		Shore	0.524564	0.616648	0.574493	0.571902	0.188604	0.182197	0.287223	0.219341	0.352561	2.28111	3.22004e-09	1.65629e-07	0.771356	0.75869	0.795338	0.775128	0.574272	0.565371	0.569502	0.569715	0.205413	1.38344	2.09415e-06	0.000146139	WTvsKO_0h	No
cg29016134_TC11	chr10	115618590	115618592	CG	VMR;chr10:115618543-115618801	FALSE	+								0.622958	0.69807	0.678759	0.666596	0.335636	0.297263	0.364966	0.332622	0.333974	2.01273	4.71375e-09	2.09007e-07	0.834584	0.84625	0.847192	0.842676	0.639537	0.555218	0.606687	0.600481	0.242195	1.83134	7.44072e-07	0.000128621	WTvsKO_0h	No
cg29036442_TC21	chr10	117380147	117380149	CG	TSS;chr10:117380014;Cpsf6;ENSMUST00000175924;-133;2	FALSE	+	Cpsf6	Cpsf6	protein_coding	ENSMUST00000175924.1	-132		Shelf	0.207849	0.307921	0.330147	0.281973	0.181235	0.132148	0.0665546	0.126646	0.155327	1.52716	6.15694e-05	0.000186197	0.716487	0.634167	0.743714	0.698122	0.414132	0.401498	0.200232	0.338621	0.359502	2.24751	0.000175062	0.00104638	WTvsKO_96h	No
cg29044583_TC21	chr10	117952132	117952134	CG	Enhancer	FALSE	+								0.137146	0.242875	0.25762	0.212547	0.0874438	0.0919152	0.066735	0.0820313	0.130516	1.55769	5.06294e-06	2.6843e-05	0.637953	0.584505	0.651638	0.624699	0.326711	0.309887	0.219153	0.28525	0.339448	2.08151	4.3211e-06	0.000176148	WTvsKO_96h	No
cg29056324_BC11	chr10	119039893	119039895	CG	Enhancer	FALSE	-	Gm33677	Gm33677	lincRNA	ENSMUST00000220074.1	10606			0.660177	0.788511	0.742105	0.730264	0.432236	0.352223	0.272456	0.352305	0.377959	2.35698	8.10522e-09	2.95291e-07	0.880319	0.873398	0.878717	0.877478	0.763027	0.655068	0.383973	0.600689	0.276788	2.19727	0.00117619	0.00362483	WTvsKO_0h	No
cg29058372_BC11	chr10	119213682	119213684	CG	EPIC;cg24580312	FALSE	-	Cand1	Cand1;Cand1	protein_coding;protein_coding	ENSMUST00000020315.12;ENSMUST00000149155.1	26373;-1073			0.699683	0.818078	0.76969	0.762483	0.467065	0.375739	0.436711	0.426505	0.335978	2.13993	1.01465e-08	3.41115e-07	0.910462	0.931276	0.904349	0.915362	0.890671	0.862505	0.850426	0.867867	0.0474947	0.721555	0.00379748	0.00830857	WTvsKO_0h	No
cg29071518_TC21	chr10	120229702	120229704	CG	GeneBody;Llph;NM_025431;inside_[intron_between_exon_2_and_3];splice=0	FALSE	+	Llph	Llph;Llph;Llph	protein_coding;protein_coding;protein_coding	ENSMUST00000020444.15;ENSMUST00000130198.2;ENSMUST00000220107.1	2633;2517;2601		Shelf	0.518274	0.618568	0.570153	0.568999	0.216189	0.1742	0.238248	0.209546	0.359453	2.33022	6.11356e-10	6.29605e-08	0.797265	0.818082	0.839085	0.818144	0.709461	0.66742	0.694729	0.690537	0.127607	1.0159	7.89513e-05	0.00065364	WTvsKO_0h	No
cg29078268_BC11	chr10	120736066	120736068	CG	VMR;chr10:120735975-120736181	FALSE	-								0.691932	0.822051	0.762532	0.758838	0.431708	0.311975	0.356217	0.366634	0.392205	2.48321	1.76198e-09	1.15268e-07	0.879882	0.886917	0.890476	0.885758	0.809437	0.743187	0.476068	0.676231	0.209527	1.79538	0.00331827	0.00752298	WTvsKO_0h	No
cg29119156_TC11	chr10	124696486	124696488	CG	Random	FALSE	+								0.654097	0.783075	0.703842	0.713671	0.385586	0.364872	0.387924	0.37946	0.334211	2.04991	1.12341e-08	3.6319e-07	0.896325	0.893884	0.908986	0.899732	0.855202	0.85084	0.797122	0.834388	0.0653436	0.819352	0.00123643	0.00375151	WTvsKO_0h	No
cg29120616_TC21	chr10	124975678	124975680	CG	Random	FALSE	-								0.605902	0.654582	0.617848	0.626111	0.290293	0.220983	0.359063	0.290113	0.335998	2.05975	1.44316e-08	4.28047e-07	0.806445	0.825767	0.828898	0.82037	0.689035	0.645192	0.703239	0.679155	0.141215	1.10822	3.16765e-05	0.000397129	WTvsKO_0h	No
cg29153058_BC11	chr10	127750968	127750970	CG	Clock;Wang148;0.115239447	FALSE	+	Gpr182	Gpr182	protein_coding	ENSMUST00000079692.5	764			0.704958	0.838444	0.772628	0.77201	0.508171	0.398273	0.418607	0.441684	0.330327	2.13971	2.88443e-08	6.73159e-07	0.965276	0.958387	0.958026	0.960563	0.929114	0.899889	0.838259	0.889087	0.0714757	1.52693	0.000462909	0.00194795	WTvsKO_0h	No
cg29153887_TC21	chr10	127855736	127855738	CG	GeneBody;Rdh19;NM_147222;inside_[intron_between_exon_1_and_2];splice=0	FALSE	-	Rdh19	Rdh19	protein_coding	ENSMUST00000077530.2	5809			0.69922	0.755782	0.752827	0.735943	0.39995	0.32858	0.484544	0.404358	0.331585	2.05303	1.66333e-08	4.68428e-07	0.845717	0.804655	0.846497	0.83229	0.770012	0.760103	0.773557	0.767891	0.0643991	0.593573	0.00330733	0.00750478	WTvsKO_0h	No
cg29159467_TC11	chr10	128304411	128304413	CG	EPIC;cg11388359	FALSE	+	Pan2	Pan2;Pan2;Pan2;Pan2;Pan2;Pan2;Pan2	protein_coding;protein_coding;protein_coding;protein_coding;protein_coding;protein_coding;protein_coding	ENSMUST00000005825.7;ENSMUST00000218137.1;ENSMUST00000218315.1;ENSMUST00000218496.1;ENSMUST00000219255.1;ENSMUST00000219721.1;ENSMUST00000219801.1	1077;1020;1038;1049;1014;1035;1036		Shore	0.437127	0.528976	0.567512	0.511205	0.121408	0.102676	0.235079	0.153054	0.35815	2.62655	5.92942e-09	2.41937e-07	0.814265	0.79655	0.850708	0.820508	0.506509	0.506058	0.568304	0.526957	0.293551	2.04757	8.68351e-07	0.000129633	WTvsKO_0h	No
cg29164270_TC21	chr10	128624632	128624634	CG	Enhancer	FALSE	-	Rps26	Rps26;Rps26	protein_coding;protein_coding	ENSMUST00000026420.6;ENSMUST00000219591.1	2115;1792		Shore	0.161982	0.219518	0.269016	0.216838	0.0494405	0.0595533	0.0679741	0.0589893	0.157849	2.1267	9.11659e-09	3.1799e-07	0.594694	0.57009	0.740569	0.635118	0.25255	0.235426	0.223296	0.237091	0.398027	2.51226	4.17209e-06	0.000174457	WTvsKO_96h	No
cg29167802_BC21	chr10	128924103	128924105	CG	EPIC;cg16337574	FALSE	-	Bloc1s1;Rdh5	Bloc1s1;Bloc1s1;Bloc1s1;Bloc1s1;Bloc1s1;Rdh5	protein_coding;protein_coding;protein_coding;protein_coding;protein_coding;protein_coding	ENSMUST00000026405.9;ENSMUST00000131271.1;ENSMUST00000141320.1;ENSMUST00000143628.1;ENSMUST00000153731.7;ENSMUST00000135161.1	-579;-68;-1077;-579;-579;-1215		Shore	0.627074	0.695955	0.664226	0.662418	0.327358	0.291357	0.338742	0.319152	0.343266	2.07164	1.87532e-09	1.19247e-07	0.794813	0.807712	0.826904	0.80981	0.622883	0.622128	0.579329	0.608113	0.201696	1.45848	2.62379e-06	0.000153938	WTvsKO_0h	No
cg29168804_BC21	chr10	129048481	129048483	CG	TSS;chr10:129047060;Olfr765;ENSMUST00000071559;-1421;2	FALSE	+	Olfr765	Olfr765;Olfr765	protein_coding;protein_coding	ENSMUST00000071559.2;ENSMUST00000216460.1	-1420;1517			0.44159	0.530886	0.471072	0.481183	0.129109	0.100063	0.189091	0.139421	0.341762	2.56534	6.19725e-10	6.34839e-08	0.726563	0.762131	0.734276	0.74099	0.491439	0.488097	0.554472	0.511336	0.229654	1.45288	4.90079e-06	0.000181969	WTvsKO_0h	No
cg29168953_BC11	chr10	129081201	129081203	CG	TSS;chr10:129080056;Olfr767;ENSMUST00000082131;-1145;2	FALSE	+	Olfr767	Olfr767;Olfr767	protein_coding;protein_coding	ENSMUST00000082131.3;ENSMUST00000213579.1	-1144;1709			0.550004	0.638425	0.629776	0.606069	0.208531	0.160667	0.244479	0.204559	0.40151	2.60447	1.37573e-10	2.78364e-08	0.773984	0.8012	0.797788	0.790991	0.616622	0.596357	0.627912	0.61363	0.17736	1.25441	4.94957e-06	0.000182488	WTvsKO_0h	No
cg29169097_TC21	chr10	129117933	129117935	CG	TSS;chr10:129117860;Olfr769;ENSMUST00000215453-ENSMUST00000216906;-73;2	FALSE	+	Olfr769	Olfr769;Olfr769	protein_coding;protein_coding	ENSMUST00000215453.1;ENSMUST00000216906.1	-72;-72			0.532746	0.592153	0.532409	0.552436	0.21009	0.160939	0.289034	0.220021	0.332415	2.16865	1.07336e-08	3.52063e-07	0.827444	0.814947	0.801422	0.814604	0.649286	0.620322	0.635983	0.635197	0.179407	1.33714	2.67376e-06	0.000154803	WTvsKO_0h	No
cg29169277_BC21	chr10	129161022	129161024	CG	TSS;chr10:129160981;Olfr771;ENSMUST00000078914;-41;1	FALSE	-	Olfr771	Olfr771;Olfr771	protein_coding;protein_coding	ENSMUST00000078914.2;ENSMUST00000214271.1	-40;3729			0.624943	0.676754	0.637534	0.64641	0.287919	0.256167	0.335266	0.293117	0.353293	2.14967	1.32602e-09	9.80972e-08	0.822354	0.808228	0.812578	0.814386	0.668205	0.631544	0.645008	0.648252	0.166134	1.25114	3.93837e-06	0.000172292	WTvsKO_0h	No
cg29169325_TC11	chr10	129172468	129172470	CG	Random	FALSE	-								0.426343	0.563792	0.49138	0.493838	0.119935	0.111566	0.135511	0.122337	0.371501	2.81146	1.91567e-11	8.51036e-09	0.668494	0.741022	0.753654	0.721057	0.524488	0.431742	0.435378	0.463869	0.257187	1.59058	2.58764e-05	0.000359182	WTvsKO_0h	No
cg29169776_TC11	chr10	129238173	129238175	CG	TSS;chr10:129238150;Olfr774;ENSMUST00000097164;+23;1	FALSE	+	Olfr774	Olfr774;Olfr774	protein_coding;protein_coding	ENSMUST00000097164.2;ENSMUST00000203248.2	23;1970			0.691163	0.776019	0.745792	0.737658	0.2644	0.263486	0.361554	0.29648	0.441178	2.7624	5.1481e-11	1.61837e-08	0.859476	0.870577	0.894435	0.87483	0.789165	0.763384	0.817226	0.789925	0.0849044	0.896874	0.000570682	0.00223415	WTvsKO_0h	No
cg29169799_TC11	chr10	129247530	129247532	CG	Random	FALSE	+	Olfr775	Olfr775	protein_coding	ENSMUST00000214109.1	-881			0.589331	0.711288	0.636971	0.645863	0.299931	0.255683	0.383866	0.31316	0.332703	2.02671	3.70384e-08	7.95732e-07	0.800337	0.834715	0.835923	0.823658	0.696031	0.642873	0.683071	0.673992	0.149666	1.17905	3.02497e-05	0.000388239	WTvsKO_0h	No
cg29169806_TC21	chr10	129249366	129249368	CG	TSS;chr10:129250535;Olfr775;ENSMUST00000097163;-1169;2	FALSE	+	Olfr775	Olfr775;Olfr775	protein_coding;protein_coding	ENSMUST00000097163.2;ENSMUST00000214109.1	-1169;955			0.537427	0.662485	0.621824	0.607245	0.253581	0.199626	0.256007	0.236405	0.37084	2.3356	9.36731e-10	8.04336e-08	0.784626	0.768083	0.791879	0.781529	0.702469	0.630496	0.676656	0.669874	0.111656	0.815008	0.000455215	0.00192731	WTvsKO_0h	No
cg29169829_BC21	chr10	129258592	129258594	CG	TSS;chr10:129259126;Olfr776;ENSMUST00000213512;-534;2	FALSE	-	Olfr776	Olfr776	protein_coding	ENSMUST00000213512.1	-534			0.610035	0.653645	0.602515	0.622065	0.273753	0.2226	0.343397	0.279917	0.342149	2.10295	6.41317e-09	2.54906e-07	0.788359	0.80788	0.785921	0.794053	0.690423	0.678542	0.69722	0.688728	0.105325	0.802425	0.000128108	0.000865843	WTvsKO_0h	No
cg29169857_BC11	chr10	129268703	129268705	CG	TSS;chr10:129269320;Olfr777;ENSMUST00000080313;+617;2	TRUE	-	Olfr777	Olfr777;Olfr777	protein_coding;protein_coding	ENSMUST00000080313.1;ENSMUST00000204573.2	618;2782			0.685566	0.802923	0.748285	0.745591	0.364435	0.285187	0.449836	0.366486	0.379105	2.38045	6.06812e-09	2.45867e-07	0.894882	0.916915	0.909828	0.907209	0.847491	0.801298	0.820609	0.823133	0.0840759	1.06968	0.000100279	0.000748812	WTvsKO_0h	No
cg29169862_TC21	chr10	129269447	129269449	CG	TSS;chr10:129269320;Olfr777;ENSMUST00000080313;-127;1	FALSE	-	Olfr777	Olfr777;Olfr777	protein_coding;protein_coding	ENSMUST00000080313.1;ENSMUST00000204573.2	-126;2038			0.600829	0.65894	0.618092	0.625953	0.268925	0.227649	0.366656	0.287743	0.33821	2.07616	1.4303e-08	4.25248e-07	0.842523	0.843534	0.82648	0.837512	0.714337	0.664803	0.761885	0.713675	0.123838	1.03798	0.000255365	0.00132673	WTvsKO_0h	No
cg29169866_BC11	chr10	129270683	129270685	CG	Random	FALSE	+	Olfr777	Olfr777;Olfr777	protein_coding;protein_coding	ENSMUST00000080313.1;ENSMUST00000204573.2	-1362;802			0.585279	0.745613	0.66221	0.664367	0.279623	0.218446	0.347443	0.281837	0.38253	2.37774	7.39612e-09	2.78415e-07	0.867736	0.882751	0.857995	0.869494	0.717227	0.653012	0.736495	0.702245	0.167249	1.49448	1.10986e-05	0.000245672	WTvsKO_0h	No
cg29170093_TC11	chr10	129319817	129319819	CG	Random	FALSE	+	Olfr780	Olfr780	protein_coding	ENSMUST00000215503.1	1701			0.444332	0.582192	0.529622	0.518715	0.151613	0.121052	0.203496	0.158721	0.359995	2.54679	7.36197e-10	7.00916e-08	0.731992	0.773154	0.763407	0.756184	0.504977	0.482691	0.581053	0.522907	0.233278	1.50265	1.13644e-05	0.000247818	WTvsKO_0h	No
cg29170665_BC11	chr10	129427501	129427503	CG	TSS;chr10:129427305;Olfr786;ENSMUST00000204529;+196;1	FALSE	-	Olfr786	Olfr786	protein_coding	ENSMUST00000204529.2	196			0.780652	0.731624	0.682001	0.731426	0.316243	0.269548	0.42629	0.337361	0.394065	2.45274	1.99501e-09	1.24155e-07	0.82728	0.813892	0.826567	0.82258	0.697695	0.720046	0.710782	0.709507	0.113072	0.924884	3.66232e-05	0.000428866	WTvsKO_0h	No
cg29170693_BC11	chr10	129436118	129436120	CG	TSS;chr10:129436813;Olfr786;ENSMUST00000076508;-695;2	FALSE	-	Olfr786	Olfr786;Olfr786	protein_coding;protein_coding	ENSMUST00000076508.2;ENSMUST00000204529.2	-695;8813			0.491001	0.645203	0.552444	0.562883	0.173622	0.140855	0.249736	0.188071	0.374811	2.52037	2.337e-09	1.36083e-07	0.778041	0.845138	0.81197	0.811716	0.67245	0.609182	0.636906	0.639513	0.172204	1.29313	5.88241e-05	0.000552915	WTvsKO_0h	No
cg29170820_BC21	chr10	129462094	129462096	CG	TSS;chr10:129461861;Olfr787;ENSMUST00000213329;+233;2,TSS;chr10:129462677;Olfr787;ENSMUST00000077836;-583;1	FALSE	+	Olfr787	Olfr787;Olfr787	protein_coding;protein_coding	ENSMUST00000077836.2;ENSMUST00000213329.1	-583;233			0.548763	0.679763	0.590805	0.606444	0.159206	0.136825	0.252905	0.182979	0.423465	2.83965	2.86954e-10	4.13218e-08	0.78721	0.80196	0.77945	0.78954	0.573244	0.528975	0.635083	0.579101	0.210439	1.44463	1.37844e-05	0.000269215	WTvsKO_0h	No
cg29170874_BC21	chr10	129484700	129484702	CG	TSS;chr10:129484751;Olfr789;ENSMUST00000213236;-51;1,TSS;chr10:129484759;Olfr789;ENSMUST00000213992;-59;1	FALSE	+	Olfr789	Olfr789;Olfr789	protein_coding;protein_coding	ENSMUST00000213236.1;ENSMUST00000213992.1	-51;-59			0.544062	0.600437	0.565155	0.569885	0.208015	0.161502	0.288522	0.219346	0.350539	2.27595	3.93127e-09	1.86951e-07	0.792153	0.797986	0.831976	0.807371	0.615592	0.568746	0.643662	0.609333	0.198038	1.42946	1.06625e-05	0.000241713	WTvsKO_0h	No
cg29170916_TC11	chr10	129498168	129498170	CG	TSS;chr10:129498491;Olfr790;ENSMUST00000203966;-323;2	FALSE	-	Olfr790	Olfr790;Olfr790	protein_coding;protein_coding	ENSMUST00000203966.2;ENSMUST00000215067.1	-323;-481			0.460965	0.574679	0.450889	0.495511	0.113098	0.0535531	0.108405	0.0916854	0.403826	3.3596	2.31552e-11	9.69097e-09	0.692606	0.773018	0.685608	0.717077	0.358681	0.309079	0.29527	0.32101	0.396067	2.43954	5.11635e-07	0.000123618	Common	No
cg29170918_TC21	chr10	129499079	129499081	CG	TSS;chr10:129498491;Olfr790;ENSMUST00000203966;+588;1,TSS;chr10:129498649;Olfr790;ENSMUST00000215067;+430;1	FALSE	-	Olfr790	Olfr790;Olfr790	protein_coding;protein_coding	ENSMUST00000203966.2;ENSMUST00000215067.1	588;430			0.601035	0.7062	0.601366	0.6362	0.286792	0.251293	0.339965	0.292683	0.343517	2.0987	8.72298e-09	3.09151e-07	0.813093	0.792412	0.795568	0.800358	0.733142	0.66426	0.652099	0.683167	0.11719	0.888383	0.00047383	0.00197807	WTvsKO_0h	No
cg29170921_BC11	chr10	129499744	129499746	CG	Random	FALSE	-	Olfr790	Olfr790;Olfr790;Olfr790;Olfr790	protein_coding;protein_coding;protein_coding;protein_coding	ENSMUST00000056002.4;ENSMUST00000203966.2;ENSMUST00000215067.1;ENSMUST00000218901.1	-1068;1253;1095;-1068			0.502067	0.56186	0.483254	0.515727	0.12042	0.0851591	0.152276	0.119285	0.396442	3.015	1.34927e-11	6.71341e-09	0.704993	0.728978	0.669011	0.700994	0.367717	0.31216	0.368354	0.34941	0.351584	2.13312	2.86129e-07	0.000111475	Common	No
cg29171080_BC21	chr10	129525807	129525809	CG	TSS;chr10:129526228;Olfr791;ENSMUST00000057477;-421;2	FALSE	+	Olfr791	Olfr791;Olfr791	protein_coding;protein_coding	ENSMUST00000057477.3;ENSMUST00000217228.1	-421;4016			0.728619	0.726022	0.704399	0.71968	0.298774	0.249773	0.366264	0.304937	0.414743	2.56402	9.49479e-11	2.28381e-08	0.838926	0.840661	0.832093	0.837227	0.713819	0.701379	0.732639	0.715946	0.121281	1.02817	1.75241e-05	0.000298043	WTvsKO_0h	No
cg29171126_TC21	chr10	129540205	129540207	CG	TSS;chr10:129540538;Olfr792;ENSMUST00000076575;-333;2	FALSE	+	Olfr792	Olfr792;Olfr792	protein_coding;protein_coding	ENSMUST00000076575.3;ENSMUST00000215436.1	-333;1044			0.685087	0.702029	0.679525	0.68888	0.331638	0.25585	0.438346	0.341945	0.346936	2.11698	1.9522e-08	5.18913e-07	0.856398	0.846808	0.852623	0.851943	0.784108	0.732668	0.797099	0.771292	0.0806515	0.762016	0.000914536	0.0030568	WTvsKO_0h	No
cg29171224_TC21	chr10	129567748	129567750	CG	TSS;chr10:129567654;Olfr794;ENSMUST00000204820;+94;1	FALSE	+	Olfr794	Olfr794	protein_coding	ENSMUST00000204820.2	94			0.505301	0.616526	0.546986	0.556271	0.178221	0.137712	0.255559	0.190497	0.365773	2.46056	2.20183e-09	1.31465e-07	0.760765	0.79365	0.793538	0.782651	0.680867	0.633494	0.666001	0.660121	0.12253	0.892152	0.000154212	0.000969585	WTvsKO_0h	No
cg29171236_TC21	chr10	129571013	129571015	CG	TSS;chr10:129570656;Olfr794;ENSMUST00000059957;+357;1	FALSE	+	Olfr794	Olfr794;Olfr794	protein_coding;protein_coding	ENSMUST00000059957.3;ENSMUST00000204820.2	357;3359			0.647447	0.690531	0.663828	0.667269	0.324152	0.272904	0.345847	0.314301	0.352968	2.13657	1.16572e-09	9.06546e-08	0.829481	0.835005	0.831689	0.832058	0.757298	0.725062	0.74017	0.740843	0.0912155	0.791868	0.000141612	0.000920538	WTvsKO_0h	No
cg29171237_BC21	chr10	129571194	129571196	CG	TSS;chr10:129570656;Olfr794;ENSMUST00000059957;+538;2	FALSE	+	Olfr794	Olfr794;Olfr794	protein_coding;protein_coding	ENSMUST00000059957.3;ENSMUST00000204820.2	538;3540			0.592067	0.64986	0.589547	0.610492	0.266459	0.205527	0.263268	0.245085	0.365407	2.28275	5.08547e-10	5.67459e-08	0.799592	0.79389	0.809349	0.800943	0.637187	0.637058	0.663969	0.646071	0.154872	1.14032	7.41467e-06	0.000209865	WTvsKO_0h	No
cg29171254_TC21	chr10	129578702	129578704	CG	PseudogeneTSS;chr10:129578680;Olfr795-ps1;ENSMUST00000205245;23	FALSE	+	Olfr795-ps1	Olfr795-ps1	unprocessed_pseudogene	ENSMUST00000205245.1	23			0.574634	0.697601	0.567418	0.613217	0.234001	0.212388	0.290992	0.245793	0.367424	2.30592	2.78016e-09	1.51393e-07	0.804511	0.804435	0.776768	0.795238	0.677706	0.630649	0.715496	0.674617	0.120621	0.901888	0.000411447	0.00180369	WTvsKO_0h	No
cg29171407_BC21	chr10	129611979	129611981	CG	TSS;chr10:129612569;Olfr796;ENSMUST00000214584;+590;2	FALSE	-	Olfr796	Olfr796	protein_coding	ENSMUST00000214584.2	591			0.594346	0.652402	0.573285	0.606678	0.240143	0.201754	0.285838	0.242578	0.364099	2.28417	8.94577e-10	7.81279e-08	0.785797	0.804687	0.815734	0.802073	0.651301	0.605244	0.633392	0.629979	0.172093	1.25245	7.78537e-06	0.000213601	WTvsKO_0h	No
cg29171459_TC11	chr10	129626182	129626184	CG	TSS;chr10:129626058;Olfr798;ENSMUST00000079810;-124;2	FALSE	-	Olfr798	Olfr798;Olfr798	protein_coding;protein_coding	ENSMUST00000079810.2;ENSMUST00000204979.2	-123;1752			0.612746	0.749857	0.73118	0.697928	0.352699	0.304528	0.405351	0.354193	0.343735	2.10325	2.03701e-08	5.34437e-07	0.853218	0.855767	0.878409	0.862465	0.793424	0.79562	0.789317	0.792787	0.0696778	0.717714	0.000466172	0.00195673	WTvsKO_0h	No
cg29171460_BC21	chr10	129626335	129626337	CG	TSS;chr10:129626058;Olfr798;ENSMUST00000079810;-277;1	FALSE	-	Olfr798	Olfr798;Olfr798	protein_coding;protein_coding	ENSMUST00000079810.2;ENSMUST00000204979.2	-276;1599			0.495489	0.683857	0.577979	0.585775	0.213599	0.176774	0.322047	0.237473	0.348302	2.23815	6.94968e-08	1.21602e-06	0.76438	0.787801	0.814878	0.78902	0.701813	0.701194	0.676188	0.693065	0.0959545	0.733535	0.000794788	0.00278205	WTvsKO_0h	No
cg29171465_BC21	chr10	129627569	129627571	CG	TSS;chr10:129627933;Olfr798;ENSMUST00000204979;+364;1	FALSE	-	Olfr798	Olfr798	protein_coding	ENSMUST00000204979.2	365			0.556478	0.626921	0.591973	0.591791	0.182695	0.16897	0.278944	0.210203	0.381588	2.4809	6.48823e-10	6.52261e-08	0.781463	0.81184	0.805765	0.799689	0.57625	0.537563	0.64477	0.586195	0.213495	1.49313	1.42068e-05	0.000272755	WTvsKO_0h	No
cg29171466_BC11	chr10	129627902	129627904	CG	TSS;chr10:129627933;Olfr798;ENSMUST00000204979;+31;2	FALSE	-	Olfr798	Olfr798	protein_coding	ENSMUST00000204979.2	32			0.512847	0.624051	0.615115	0.584004	0.223387	0.188514	0.318023	0.243308	0.340696	2.16195	1.88058e-08	5.06892e-07	0.755456	0.772086	0.738378	0.755307	0.638164	0.672539	0.582001	0.630901	0.124405	0.849998	0.000620848	0.00235916	WTvsKO_0h	No
cg29171470_TC11	chr10	129628659	129628661	CG	Random	FALSE	-	Olfr798	Olfr798	protein_coding	ENSMUST00000204979.2	-725			0.579428	0.715673	0.657463	0.650855	0.152017	0.0823388	0.188527	0.140961	0.509894	3.59952	1.24326e-11	6.3667e-09	0.811535	0.814345	0.803079	0.809653	0.518633	0.430789	0.563348	0.504257	0.305396	2.06472	1.56118e-06	0.000140204	WTvsKO_0h	No
cg29171514_BC11	chr10	129643727	129643729	CG	Random	TRUE	-	Olfr799	Olfr799;Olfr799;Olfr799;Olfr799	protein_coding;protein_coding;protein_coding;protein_coding	ENSMUST00000213820.1;ENSMUST00000214182.1;ENSMUST00000216446.1;ENSMUST00000217364.1	6244;6244;6244;6244			0.513174	0.588397	0.543649	0.548407	0.167047	0.159935	0.227	0.184661	0.363746	2.44096	2.37539e-10	3.70668e-08	0.708254	0.751526	0.717017	0.725599	0.52407	0.479544	0.535773	0.513129	0.21247	1.32996	8.00322e-06	0.000215605	WTvsKO_0h	No
cg29171522_BC21	chr10	129647483	129647485	CG	TSS;chr10:129647129;Olfr799;ENSMUST00000071126;+354;1	TRUE	+	Olfr799	Olfr799;Olfr799;Olfr799;Olfr799;Olfr799	protein_coding;protein_coding;protein_coding;protein_coding;protein_coding	ENSMUST00000071126.2;ENSMUST00000213820.1;ENSMUST00000214182.1;ENSMUST00000216446.1;ENSMUST00000217364.1	354;10000;10000;10000;10000			0.576617	0.645069	0.623502	0.615062	0.22072	0.191983	0.265607	0.226104	0.388959	2.4653	1.44464e-10	2.86387e-08	0.813288	0.843327	0.836546	0.831054	0.668642	0.629784	0.694854	0.664427	0.166627	1.31344	1.22553e-05	0.000255289	WTvsKO_0h	No
cg29171559_BC21	chr10	129661079	129661081	CG	TSS;chr10:129659803;Olfr800;ENSMUST00000104903;+1276;1	FALSE	+	Olfr800	Olfr800	protein_coding	ENSMUST00000217094.1	3386			0.746453	0.806232	0.75277	0.768485	0.385156	0.334083	0.459281	0.39284	0.375645	2.37548	7.11125e-10	6.87489e-08	0.867029	0.886295	0.891357	0.88156	0.80664	0.803763	0.800126	0.80351	0.0780504	0.869306	0.00011411	0.000807609	WTvsKO_0h	No
cg29171606_TC11	chr10	129671637	129671639	CG	Random	FALSE	+	Olfr801	Olfr801;Olfr801;Olfr801;Olfr801	protein_coding;protein_coding;protein_coding;protein_coding	ENSMUST00000072063.2;ENSMUST00000203424.1;ENSMUST00000213294.1;ENSMUST00000216067.2	-1120;2228;2153;2200			0.582188	0.712912	0.660625	0.651909	0.293734	0.26195	0.363216	0.3063	0.345609	2.10731	1.26626e-08	3.91954e-07	0.840828	0.851278	0.885431	0.859179	0.75593	0.730239	0.739146	0.741771	0.117407	1.09938	8.6316e-05	0.000687463	WTvsKO_0h	No
cg29171611_BC11	chr10	129673625	129673627	CG	TSS;chr10:129673789;Olfr801;ENSMUST00000213294;+164;1,TSS;chr10:129673836;Olfr801;ENSMUST00000216067;+211;1,TSS;chr10:129673864;Olfr801;ENSMUST00000203424;+239;1	FALSE	+	Olfr801	Olfr801;Olfr801;Olfr801	protein_coding;protein_coding;protein_coding	ENSMUST00000203424.1;ENSMUST00000213294.1;ENSMUST00000216067.2	240;165;212			0.664365	0.777677	0.760441	0.734161	0.255271	0.26883	0.318891	0.280997	0.453164	2.84702	2.93278e-11	1.13161e-08	0.878715	0.897783	0.878657	0.885052	0.641082	0.626209	0.72125	0.662847	0.222205	1.96505	1.80941e-06	0.000141929	WTvsKO_0h	No
cg29171654_BC11	chr10	129681774	129681776	CG	Random	FALSE	+	Olfr802	Olfr802;Olfr802	protein_coding;protein_coding	ENSMUST00000203785.2;ENSMUST00000217576.1	6385;6395			0.539673	0.712405	0.66222	0.6381	0.242084	0.245779	0.332182	0.273348	0.364751	2.26032	1.15166e-08	3.69227e-07	0.788653	0.810082	0.808645	0.80246	0.737204	0.675853	0.659633	0.690897	0.111564	0.856325	0.000530162	0.00212834	WTvsKO_0h	No
cg29171676_TC21	chr10	129687906	129687908	CG	TSS;chr10:129688158;Olfr802;ENSMUST00000203785;+252;2,TSS;chr10:129688168;Olfr802;ENSMUST00000217576;+262;2	FALSE	+	Olfr802	Olfr802;Olfr802	protein_coding;protein_coding	ENSMUST00000203785.2;ENSMUST00000217576.1	253;263			0.477058	0.497869	0.438345	0.471091	0.0649343	0.0450758	0.111828	0.0739461	0.397145	3.58004	4.32954e-12	2.89989e-09	0.639687	0.670571	0.614661	0.64164	0.279832	0.267071	0.36748	0.304794	0.336846	2.04362	1.94622e-06	0.000144049	Common	No
cg29171681_TC11	chr10	129689822	129689824	CG	Random	FALSE	-								0.673971	0.784625	0.728149	0.728915	0.309908	0.253085	0.414672	0.325888	0.403027	2.51594	1.97781e-09	1.23543e-07	0.844548	0.872172	0.85191	0.85621	0.667057	0.625987	0.702354	0.665133	0.191078	1.58406	4.16276e-06	0.00017437	WTvsKO_0h	No
cg29171699_TC11	chr10	129693421	129693423	CG	TSS;chr10:129694285;Olfr803;ENSMUST00000204641;+864;2	FALSE	+	Olfr803	Olfr803;Olfr803	protein_coding;protein_coding	ENSMUST00000056736.3;ENSMUST00000204641.2	-1382;865			0.694056	0.803029	0.714462	0.737182	0.23914	0.191719	0.37955	0.270136	0.467046	2.9957	4.48797e-10	5.31916e-08	0.85918	0.830806	0.837548	0.842511	0.751228	0.727084	0.705502	0.727938	0.114573	1.00087	7.42925e-05	0.000631598	WTvsKO_0h	No
cg29171734_TC21	chr10	129704258	129704260	CG	TSS;chr10:129703209;Olfr804;ENSMUST00000213331;+1049;1,TSS;chr10:129704879;Olfr804;ENSMUST00000077312;-621;1	FALSE	+	Olfr804	Olfr804;Olfr804;Olfr804	protein_coding;protein_coding;protein_coding	ENSMUST00000077312.2;ENSMUST00000213331.1;ENSMUST00000216747.1	-621;1049;1026			0.638598	0.686581	0.64841	0.657863	0.266077	0.253336	0.400936	0.306783	0.35108	2.14606	1.11579e-08	3.61566e-07	0.818184	0.820925	0.811232	0.81678	0.703441	0.676881	0.713492	0.697938	0.118842	0.946955	3.93002e-05	0.000445129	WTvsKO_0h	No
cg29171743_TC21	chr10	129705947	129705949	CG	TSS;chr10:129704879;Olfr804;ENSMUST00000077312;+1068;2	FALSE	+	Olfr804	Olfr804;Olfr804	protein_coding;protein_coding	ENSMUST00000213331.1;ENSMUST00000216747.1	2738;2715			0.663276	0.670434	0.602456	0.645389	0.288604	0.232613	0.328026	0.283081	0.362308	2.22016	1.54103e-09	1.06671e-07	0.861711	0.841264	0.839905	0.847627	0.719216	0.682869	0.714429	0.705504	0.142123	1.21677	9.47331e-06	0.000230314	WTvsKO_0h	No
cg29171812_TC21	chr10	129723309	129723311	CG	TSS;chr10:129723541;Olfr805;ENSMUST00000078876;+232;1	FALSE	-	Olfr805	Olfr805;Olfr805;Olfr805	protein_coding;protein_coding;protein_coding	ENSMUST00000078876.3;ENSMUST00000216794.1;ENSMUST00000217219.1	233;6052;6066			0.546487	0.605074	0.534754	0.562105	0.19434	0.15727	0.274889	0.208833	0.353272	2.31941	2.74327e-09	1.49884e-07	0.797671	0.79218	0.788208	0.792686	0.612511	0.564816	0.635775	0.604368	0.188319	1.3217	6.645e-06	0.000201357	WTvsKO_0h	No
cg29171831_BC21	chr10	129729227	129729229	CG	TSS;chr10:129729291;Olfr805;ENSMUST00000204717;+64;2,TSS;chr10:129729360;Olfr805;ENSMUST00000216794;+133;2,TSS;chr10:129729374;Olfr805;ENSMUST00000217219;+147;2	FALSE	-	Olfr805	Olfr805;Olfr805;Olfr805	protein_coding;protein_coding;protein_coding	ENSMUST00000204717.2;ENSMUST00000216794.1;ENSMUST00000217219.1	65;134;148			0.568111	0.726437	0.668959	0.654502	0.32612	0.24369	0.372651	0.314154	0.340349	2.08395	5.73537e-08	1.06648e-06	0.79815	0.788124	0.808129	0.798134	0.746696	0.699695	0.694632	0.713674	0.0844602	0.662461	0.00133236	0.00394916	WTvsKO_0h	No
cg29171832_TC21	chr10	129729273	129729275	CG	TSS;chr10:129729291;Olfr805;ENSMUST00000204717;+18;1,TSS;chr10:129729360;Olfr805;ENSMUST00000216794;+87;1,TSS;chr10:129729374;Olfr805;ENSMUST00000217219;+101;1	FALSE	+	Olfr805	Olfr805;Olfr805;Olfr805	protein_coding;protein_coding;protein_coding	ENSMUST00000204717.2;ENSMUST00000216794.1;ENSMUST00000217219.1	19;88;102			0.481255	0.561509	0.510189	0.517651	0.186721	0.126268	0.249037	0.187342	0.330309	2.2711	9.13051e-09	3.18339e-07	0.722789	0.746646	0.777428	0.748954	0.519227	0.492628	0.548448	0.520101	0.228853	1.46579	5.01344e-06	0.000183455	WTvsKO_0h	No
cg29171926_TC11	chr10	129757425	129757427	CG	TSS;chr10:129757742;Olfr807;ENSMUST00000213379;+317;2,TSS;chr10:129757792;Olfr807;ENSMUST00000217106;+367;2	FALSE	+	Olfr807	Olfr807;Olfr807	protein_coding;protein_coding	ENSMUST00000213379.1;ENSMUST00000217106.1	318;368			0.594889	0.693142	0.70832	0.66545	0.338891	0.207503	0.412442	0.319612	0.345838	2.13926	1.54599e-07	2.10061e-06	0.820133	0.828595	0.830467	0.826399	0.749674	0.657302	0.79845	0.735142	0.0912565	0.748803	0.0105053	0.0180563	WTvsKO_0h	No
cg29171951_BC11	chr10	129766022	129766024	CG	TSS;chr10:129765481;Olfr808;ENSMUST00000203236;+541;2	FALSE	-	Olfr808	Olfr808;Olfr808	protein_coding;protein_coding	ENSMUST00000060636.1;ENSMUST00000203236.2	-1475;541			0.40904	0.479551	0.447846	0.445479	0.0696761	0.0794965	0.0866064	0.078593	0.366886	3.24006	2.75945e-13	3.21795e-10	0.655748	0.725399	0.668798	0.683315	0.352661	0.2537	0.356508	0.320956	0.362359	2.20995	2.39007e-06	0.000150026	Common	No
cg29171953_BC21	chr10	129767046	129767048	CG	TSS;chr10:129767497;Olfr808;ENSMUST00000060636;-451;2	FALSE	+	Olfr808	Olfr808;Olfr808	protein_coding;protein_coding	ENSMUST00000060636.1;ENSMUST00000203236.2	-451;1565			0.587773	0.686156	0.589179	0.621036	0.272349	0.220343	0.363345	0.285346	0.33569	2.07019	3.59433e-08	7.79695e-07	0.809093	0.784236	0.803659	0.798996	0.668584	0.652309	0.743122	0.688005	0.110991	0.84192	0.00105753	0.0033698	WTvsKO_0h	No
cg29171955_BC11	chr10	129767816	129767818	CG	TSS;chr10:129767497;Olfr808;ENSMUST00000060636;+319;1	FALSE	-	Olfr808	Olfr808;Olfr808	protein_coding;protein_coding	ENSMUST00000060636.1;ENSMUST00000203236.2	319;2335			0.550482	0.669799	0.607043	0.609108	0.197074	0.170695	0.27276	0.21351	0.395599	2.55398	5.21463e-10	5.74257e-08	0.831656	0.846355	0.86079	0.846267	0.661456	0.618169	0.668211	0.649279	0.196988	1.57441	1.79997e-06	0.000141929	WTvsKO_0h	No
cg29171957_BC11	chr10	129768051	129768053	CG	Random	FALSE	+	Olfr808	Olfr808;Olfr808	protein_coding;protein_coding	ENSMUST00000060636.1;ENSMUST00000203236.2	554;2570			0.595298	0.680602	0.616698	0.630866	0.253093	0.207235	0.30476	0.255029	0.375837	2.34034	8.98934e-10	7.84559e-08	0.808048	0.837671	0.838762	0.82816	0.638109	0.569844	0.620908	0.609621	0.218539	1.62814	2.32015e-06	0.000149457	WTvsKO_0h	No
cg29171966_TC11	chr10	129771849	129771851	CG	Random	FALSE	-								0.49195	0.669732	0.654916	0.605533	0.237757	0.189259	0.308637	0.245218	0.360315	2.28034	2.57185e-08	6.2361e-07	0.832154	0.834453	0.855202	0.840603	0.671009	0.633987	0.677615	0.66087	0.179733	1.43767	2.64283e-06	0.00015404	WTvsKO_0h	No
cg29171971_BC11	chr10	129774761	129774763	CG	TSS;chr10:129774637;Olfr809;ENSMUST00000203598;+124;1	FALSE	-	Olfr809	Olfr809;Olfr809;Olfr809	protein_coding;protein_coding;protein_coding	ENSMUST00000059891.2;ENSMUST00000203598.2;ENSMUST00000218237.1	-1065;124;-1065			0.581698	0.680847	0.684389	0.648978	0.2741	0.154398	0.309194	0.245897	0.403081	2.56788	4.06364e-09	1.90901e-07	0.841219	0.840938	0.850078	0.844078	0.641794	0.633359	0.662505	0.645886	0.198192	1.5694	4.37762e-07	0.000121972	WTvsKO_0h	No
cg29172017_BC21	chr10	129787270	129787272	CG	PMDsoloWCGW	FALSE	-								0.528273	0.606425	0.557755	0.564151	0.157229	0.128131	0.254939	0.1801	0.384051	2.61926	8.93883e-10	7.8099e-08	0.741158	0.765692	0.770745	0.759199	0.54246	0.524357	0.551183	0.539333	0.219865	1.43089	1.39106e-06	0.00013778	WTvsKO_0h	No
cg29172028_BC21	chr10	129791605	129791607	CG	TSS;chr10:129791613;Olfr810;ENSMUST00000091986;+8;1	FALSE	+	Olfr810	Olfr810;Olfr810;Olfr810;Olfr810	protein_coding;protein_coding;protein_coding;protein_coding	ENSMUST00000091986.3;ENSMUST00000214206.1;ENSMUST00000214878.1;ENSMUST00000217283.1	9;3312;3312;3261			0.688917	0.753086	0.709279	0.717094	0.316298	0.265455	0.400626	0.32746	0.389635	2.40141	8.14279e-10	7.4043e-08	0.846435	0.84162	0.857212	0.848422	0.74995	0.689661	0.737767	0.725793	0.122629	1.07639	4.77258e-05	0.000493936	WTvsKO_0h	No
cg29172057_BC21	chr10	129801928	129801930	CG	TSS;chr10:129802522;Olfr811;ENSMUST00000076437;+594;1	FALSE	-	Olfr811	Olfr811;Olfr811;Olfr811;Olfr811	protein_coding;protein_coding;protein_coding;protein_coding	ENSMUST00000076437.1;ENSMUST00000215058.1;ENSMUST00000216283.1;ENSMUST00000217571.1	595;2434;2468;2468			0.634536	0.728683	0.626271	0.663163	0.327224	0.284678	0.37715	0.329684	0.33348	2.01965	1.53491e-08	4.4515e-07	0.855239	0.859872	0.871635	0.862249	0.756679	0.725496	0.763981	0.748719	0.11353	1.06997	2.47397e-05	0.000351761	WTvsKO_0h	No
cg29172061_BC21	chr10	129803181	129803183	CG	TSS;chr10:129802522;Olfr811;ENSMUST00000076437;-659;2	FALSE	-	Olfr811	Olfr811;Olfr811;Olfr811;Olfr811	protein_coding;protein_coding;protein_coding;protein_coding	ENSMUST00000076437.1;ENSMUST00000215058.1;ENSMUST00000216283.1;ENSMUST00000217571.1	-658;1181;1215;1215			0.573361	0.719758	0.610788	0.634636	0.211214	0.222103	0.286759	0.240025	0.394611	2.48707	9.08472e-10	7.88747e-08	0.830733	0.855805	0.814998	0.833845	0.698929	0.652465	0.71781	0.689735	0.144111	1.17763	5.51767e-05	0.000533474	WTvsKO_0h	No
cg29172065_BC21	chr10	129804311	129804313	CG	TSS;chr10:129804361;Olfr811;ENSMUST00000215058;+50;2,TSS;chr10:129804395;Olfr811;ENSMUST00000217571;+84;2	FALSE	+	Olfr811	Olfr811;Olfr811;Olfr811	protein_coding;protein_coding;protein_coding	ENSMUST00000215058.1;ENSMUST00000216283.1;ENSMUST00000217571.1	51;85;85			0.728562	0.806014	0.739537	0.758038	0.409479	0.361319	0.501406	0.424068	0.33397	2.10892	1.22952e-08	3.84686e-07	0.903817	0.890161	0.897289	0.897089	0.838697	0.796043	0.824883	0.819874	0.0772149	0.933006	0.000129665	0.000872138	WTvsKO_0h	No
cg29172264_BC21	chr10	129842254	129842256	CG	TSS;chr10:129843061;Olfr812;ENSMUST00000057775;+807;1	FALSE	+	Olfr812	Olfr812;Olfr812;Olfr812	protein_coding;protein_coding;protein_coding	ENSMUST00000057775.2;ENSMUST00000203571.1;ENSMUST00000205013.2	808;3743;3840			0.577913	0.660721	0.572625	0.603753	0.232788	0.159382	0.266869	0.219679	0.384073	2.47149	9.34276e-10	8.03327e-08	0.810983	0.800414	0.823929	0.811776	0.613394	0.561517	0.59465	0.589854	0.221922	1.58521	9.72668e-07	0.000131439	WTvsKO_0h	No
cg29172323_TC11	chr10	129857632	129857634	CG	Random	FALSE	+	Olfr813	Olfr813	protein_coding	ENSMUST00000204622.2	2266			0.636899	0.637485	0.629232	0.634538	0.248259	0.219946	0.277672	0.248626	0.385913	2.3974	8.6772e-11	2.17199e-08	0.806102	0.797055	0.815692	0.806283	0.639783	0.598899	0.669722	0.636135	0.170149	1.24941	1.30082e-05	0.000261928	WTvsKO_0h	No
cg29172532_BC21	chr10	129913388	129913390	CG	TSS;chr10:129912275;Olfr816;ENSMUST00000071605;-1113;2	FALSE	-	Olfr816	Olfr816;Olfr816;Olfr816	protein_coding;protein_coding;protein_coding	ENSMUST00000071605.1;ENSMUST00000213438.1;ENSMUST00000213618.1	-1112;2209;2157			0.536695	0.629846	0.547855	0.571465	0.1994	0.158631	0.257475	0.205168	0.366297	2.39884	1.10741e-09	8.82243e-08	0.826104	0.808364	0.83533	0.823266	0.662859	0.642558	0.679343	0.661587	0.161679	1.25431	6.16193e-06	0.000196944	WTvsKO_0h	No
cg29173659_TC11	chr10	130165029	130165031	CG	Random	FALSE	+	Olfr825	Olfr825;Olfr825	protein_coding;protein_coding	ENSMUST00000216434.1;ENSMUST00000216530.1	1706;1737			0.537248	0.703371	0.606406	0.615675	0.144347	0.11968	0.275829	0.179952	0.435723	2.97448	1.62621e-09	1.10186e-07	0.835342	0.846349	0.862041	0.847911	0.640545	0.594006	0.638631	0.624394	0.223517	1.748	6.02719e-07	0.000125728	WTvsKO_0h	No
cg29173663_TC21	chr10	130167622	130167624	CG	TSS;chr10:130166765;Olfr825;ENSMUST00000216530;-857;1	FALSE	+	Olfr825	Olfr825;Olfr825	protein_coding;protein_coding	ENSMUST00000216434.1;ENSMUST00000216530.1	-887;-856			0.535499	0.616879	0.590066	0.580815	0.240245	0.182435	0.310412	0.244364	0.336451	2.13147	1.23122e-08	3.85079e-07	0.710186	0.782541	0.763081	0.751936	0.576781	0.584071	0.643964	0.601605	0.150331	1.01218	0.000320426	0.00153541	WTvsKO_0h	No
cg29174876_BC11	chr10	130456370	130456372	CG	TSS;chr10:130456049;Vmn2r86;ENSMUST00000170257;-321;2	FALSE	+	Vmn2r86	Vmn2r86	protein_coding	ENSMUST00000170257.3	-320			0.546475	0.702719	0.636242	0.628479	0.254515	0.216915	0.271692	0.247707	0.380771	2.38058	1.27699e-09	9.59372e-08	0.807687	0.813159	0.823143	0.814663	0.662204	0.636397	0.634169	0.644257	0.170406	1.27941	2.88138e-06	0.000157879	WTvsKO_0h	No
cg29182012_TC21	chr11	3647762	3647764	CG	Enhancer	FALSE	-	Gm27640;Gm27937;Morc2a;Tug1	Gm27640;Gm27937;Morc2a;Tug1;Tug1;Tug1;Tug1;Tug1;Tug1;Tug1	misc_RNA;misc_RNA;protein_coding;protein_coding;protein_coding;protein_coding;protein_coding;protein_coding;protein_coding;protein_coding	ENSMUST00000184580.1;ENSMUST00000183605.1;ENSMUST00000096441.4;ENSMUST00000132077.3;ENSMUST00000144852.1;ENSMUST00000153313.8;ENSMUST00000182330.1;ENSMUST00000226545.1;ENSMUST00000226724.1;ENSMUST00000227137.1	-437;-733;-1428;-226;1050;-232;1280;-480;144;-630		Shore	0.165282	0.279488	0.301816	0.248862	0.0572506	0.0670349	0.0912676	0.071851	0.177011	2.08117	8.11202e-08	1.35297e-06	0.6951	0.663955	0.768065	0.70904	0.358077	0.335982	0.358996	0.351018	0.358022	2.18672	9.29362e-07	0.000131084	WTvsKO_96h	No
cg29188807_BC11	chr11	4209928	4209930	CG	EPIC;cg25504621	FALSE	+	Tbc1d10a	Tbc1d10a;Tbc1d10a;Tbc1d10a;Tbc1d10a	protein_coding;protein_coding;protein_coding;protein_coding	ENSMUST00000041042.12;ENSMUST00000147485.7;ENSMUST00000151672.1;ENSMUST00000180088.1	23140;23140;4506;23107			0.686216	0.804201	0.755884	0.748767	0.41178	0.360316	0.472681	0.414926	0.333841	2.09935	1.6545e-08	4.67128e-07	0.946554	0.936403	0.947079	0.943345	0.907693	0.853477	0.843769	0.868313	0.0750325	1.30504	0.000221498	0.0012134	WTvsKO_0h	No
cg29203349_TC11	chr11	5495409	5495411	CG	Enhancer	FALSE	-	Gm11962	Gm11962	processed_pseudogene	ENSMUST00000145746.1	37			0.169376	0.34319	0.380576	0.297714	0.0588703	0.0451893	0.031176	0.0450785	0.252635	3.1415	9.67316e-10	8.18003e-08	0.610648	0.576574	0.665903	0.617708	0.301075	0.340112	0.155746	0.265644	0.352064	2.23314	9.34062e-05	0.000719626	WTvsKO_96h	No
cg29203997_TC21	chr11	5540940	5540942	CG	Enhancer	FALSE	-	Ccdc117	Ccdc117	protein_coding	ENSMUST00000020776.4	1247		Shore	0.225538	0.299497	0.308634	0.277889	0.0556355	0.0530372	0.0834552	0.0640427	0.213847	2.51046	3.83731e-10	4.88084e-08	0.642257	0.62051	0.724645	0.662471	0.309967	0.299206	0.352541	0.320571	0.341899	2.06967	1.81745e-06	0.000141929	WTvsKO_96h	No
cg29213591_TC21	chr11	6325177	6325179	CG	EPIC;cg06287636	FALSE	+	Ogdh	Ogdh;Ogdh;Ogdh;Ogdh	protein_coding;protein_coding;protein_coding;protein_coding	ENSMUST00000003461.14;ENSMUST00000081894.4;ENSMUST00000093350.9;ENSMUST00000101554.8	33545;32573;33510;33512			0.574467	0.674203	0.577272	0.608647	0.253263	0.229559	0.312827	0.265217	0.343431	2.12459	5.49572e-09	2.30988e-07	0.831592	0.830839	0.827611	0.830014	0.708709	0.666472	0.678115	0.684432	0.145582	1.16897	7.8671e-06	0.00021449	WTvsKO_0h	No
cg29245053_TC11	chr11	10774358	10774360	CG	Adenoma	FALSE	+								0.614783	0.702276	0.660553	0.659204	0.274483	0.221223	0.326846	0.274184	0.38502	2.37776	7.5702e-10	7.13377e-08	0.833433	0.84802	0.83042	0.837291	0.641988	0.651766	0.648316	0.647357	0.189935	1.4886	6.62862e-07	0.000127457	WTvsKO_0h	No
cg29248128_TC21	chr11	11418229	11418231	CG	Adenoma	FALSE	+	Zpbp	Zpbp	protein_coding	ENSMUST00000020413.3	44179			0.534706	0.624134	0.554697	0.571179	0.17031	0.155135	0.26919	0.198212	0.372967	2.47321	1.32699e-09	9.81415e-08	0.7723	0.79845	0.755812	0.775521	0.529992	0.491943	0.581102	0.534346	0.241175	1.59305	4.8892e-06	0.000181931	WTvsKO_0h	No
cg29248422_TC11	chr11	11463148	11463150	CG	Random	FALSE	+	Spata48;Zpbp	Spata48;Spata48;Zpbp	protein_coding;protein_coding;protein_coding	ENSMUST00000020410.10;ENSMUST00000170661.1;ENSMUST00000020413.3	-1107;1055;-740		Shore	0.521511	0.631334	0.573897	0.575581	0.176869	0.159967	0.236203	0.191013	0.384568	2.54472	2.32462e-10	3.65804e-08	0.828635	0.820363	0.829706	0.826235	0.664246	0.554594	0.519147	0.579329	0.246906	1.77941	1.25597e-05	0.000258213	WTvsKO_0h	No
cg29250147_TC11	chr11	11718483	11718485	CG	Adenoma	FALSE	+	Ikzf1	Ikzf1;Ikzf1;Ikzf1;Ikzf1;Ikzf1	protein_coding;protein_coding;protein_coding;protein_coding;protein_coding	ENSMUST00000018798.6;ENSMUST00000048122.12;ENSMUST00000065433.11;ENSMUST00000076700.10;ENSMUST00000126058.7	32039;32255;32559;32271;33481			0.73037	0.791551	0.763578	0.761833	0.475936	0.373989	0.410386	0.420104	0.341729	2.153	2.15792e-09	1.29822e-07	0.905715	0.900278	0.900467	0.902153	0.82617	0.801874	0.800443	0.809496	0.0926577	1.11535	1.14113e-05	0.000248199	WTvsKO_0h	No
cg29252895_TC21	chr11	12025123	12025125	CG	ImprintDMR;chr11:12025124-12027097;M;DMR_Meg1_Grb10	FALSE	-	Grb10	Grb10;Grb10;Grb10;Grb10;Grb10	protein_coding;protein_coding;protein_coding;protein_coding;protein_coding	ENSMUST00000093321.11;ENSMUST00000109654.7;ENSMUST00000143386.7;ENSMUST00000143915.1;ENSMUST00000150972.7	12278;2848;13560;1609;1201		Shore	0.637974	0.600757	0.53284	0.590524	0.162415	0.118991	0.174985	0.15213	0.438393	3.02958	6.30497e-12	3.93073e-09	0.731863	0.726567	0.691261	0.716564	0.36634	0.356756	0.40341	0.375502	0.341062	2.0756	1.25192e-07	9.37041e-05	Common	No
cg29252898_BC21	chr11	12025410	12025412	CG	ImprintDMR;chr11:12025124-12027097;M;DMR_Meg1_Grb10	FALSE	+	Grb10	Grb10;Grb10;Grb10;Grb10;Grb10	protein_coding;protein_coding;protein_coding;protein_coding;protein_coding	ENSMUST00000093321.11;ENSMUST00000109654.7;ENSMUST00000143386.7;ENSMUST00000143915.1;ENSMUST00000150972.7	11991;2561;13273;1322;914		Shore	0.619256	0.612737	0.583126	0.60504	0.251917	0.227488	0.297296	0.2589	0.346139	2.14097	1.09935e-09	8.80087e-08	0.69679	0.66936	0.660945	0.675698	0.402612	0.379043	0.450013	0.410556	0.265142	1.58393	2.03757e-06	0.000145423	WTvsKO_0h	No
cg29252903_BC11	chr11	12025480	12025482	CG	ImprintDMR;chr11:12025124-12027097;M;DMR_Meg1_Grb10,MonoallelicMeth	FALSE	+	Grb10	Grb10;Grb10;Grb10;Grb10;Grb10	protein_coding;protein_coding;protein_coding;protein_coding;protein_coding	ENSMUST00000093321.11;ENSMUST00000109654.7;ENSMUST00000143386.7;ENSMUST00000143915.1;ENSMUST00000150972.7	11921;2491;13203;1252;844		Shore	0.50152	0.506254	0.501165	0.50298	0.0392153	0.0293391	0.0414546	0.0366697	0.46631	4.74854	9.08276e-17	8.47354e-13	0.568891	0.527524	0.474229	0.523548	0.0909536	0.0715392	0.0733588	0.0786172	0.444931	3.69613	4.39368e-09	1.35026e-05	Common	Yes
cg29253046_TC21	chr11	12026796	12026798	CG	Enhancer,ImprintDMR;chr11:12025124-12027097;M;DMR_Meg1_Grb10,TSS;chr11:12026731;Grb10;ENSMUST00000143915;-65;1	FALSE	-	Grb10	Grb10;Grb10;Grb10;Grb10;Grb10	protein_coding;protein_coding;protein_coding;protein_coding;protein_coding	ENSMUST00000093321.11;ENSMUST00000109654.7;ENSMUST00000143386.7;ENSMUST00000143915.1;ENSMUST00000150972.7	10605;1175;11887;-64;-472		Shore	0.484649	0.428505	0.389718	0.434291	0.096147	0.0665144	0.130822	0.0978279	0.336463	2.87487	7.78609e-11	2.03838e-08	0.488544	0.426088	0.379763	0.431465	0.121334	0.108119	0.18889	0.139448	0.292017	2.26646	8.0438e-06	0.000215987	WTvsKO_0h	No
cg29253050_TC21	chr11	12026854	12026856	CG	EPIC;cg23023285,ImprintDMR;chr11:12025124-12027097;M;DMR_Meg1_Grb10,MonoallelicMeth,TSS;chr11:12026731;Grb10;ENSMUST00000143915;-123;2	FALSE	-	Grb10	Grb10;Grb10;Grb10;Grb10;Grb10	protein_coding;protein_coding;protein_coding;protein_coding;protein_coding	ENSMUST00000093321.11;ENSMUST00000109654.7;ENSMUST00000143386.7;ENSMUST00000143915.1;ENSMUST00000150972.7	10547;1117;11829;-122;-530		Shore	0.404577	0.361546	0.327099	0.364408	0.0452117	0.0409251	0.0530714	0.0464027	0.318005	3.56323	5.3838e-14	8.42127e-11	0.473594	0.376225	0.338243	0.396021	0.0514286	0.0475948	0.0759343	0.0583192	0.337701	3.4276	1.72676e-07	0.000103932	WTvsKO_96h	No
cg29253059_TC21	chr11	12027967	12027969	CG	MonoallelicMeth,TSS;chr11:12027970;Grb10;ENSMUST00000109654;+3;1	FALSE	+	Grb10	Grb10;Grb10;Grb10;Grb10	protein_coding;protein_coding;protein_coding;protein_coding	ENSMUST00000093321.11;ENSMUST00000109654.7;ENSMUST00000143386.7;ENSMUST00000143915.1	9434;4;10716;-1235		Shore	0.517829	0.5737	0.501507	0.531012	0.146814	0.126957	0.188318	0.15403	0.376982	2.65613	4.64273e-11	1.54181e-08	0.632324	0.671519	0.645348	0.64973	0.366327	0.332186	0.337146	0.345219	0.304511	1.81697	2.33059e-07	0.000108644	WTvsKO_0h	No
cg29253063_TC21	chr11	12028024	12028026	CG	TSS;chr11:12027970;Grb10;ENSMUST00000109654;-54;2	FALSE	-	Grb10	Grb10;Grb10;Grb10;Grb10	protein_coding;protein_coding;protein_coding;protein_coding	ENSMUST00000093321.11;ENSMUST00000109654.7;ENSMUST00000143386.7;ENSMUST00000143915.1	9377;-53;10659;-1292		Shore	0.684976	0.752779	0.699016	0.712257	0.351325	0.313057	0.428592	0.364325	0.347932	2.12534	4.40551e-09	2.00558e-07	0.829722	0.847128	0.809309	0.82872	0.618138	0.593616	0.633704	0.615153	0.213567	1.60269	1.41057e-06	0.00013778	WTvsKO_0h	No
cg29253064_TC11	chr11	12028100	12028102	CG	MonoallelicMeth	FALSE	-	Grb10	Grb10;Grb10;Grb10;Grb10	protein_coding;protein_coding;protein_coding;protein_coding	ENSMUST00000093321.11;ENSMUST00000109654.7;ENSMUST00000143386.7;ENSMUST00000143915.1	9301;-129;10583;-1368		Shore	0.40305	0.465988	0.422619	0.430552	0.0476611	0.0304848	0.0726241	0.0502566	0.380295	3.92431	3.71982e-13	4.12685e-10	0.52814	0.547195	0.509162	0.528166	0.191114	0.155354	0.179512	0.175327	0.352839	2.40177	3.3734e-08	4.71954e-05	Common	No
cg29253065_TC21	chr11	12028126	12028128	CG	MonoallelicMeth	FALSE	+	Grb10	Grb10;Grb10;Grb10;Grb10	protein_coding;protein_coding;protein_coding;protein_coding	ENSMUST00000093321.11;ENSMUST00000109654.7;ENSMUST00000143386.7;ENSMUST00000143915.1	9275;-155;10557;-1394		Shore	0.551778	0.573525	0.50609	0.543797	0.137204	0.125477	0.203868	0.155516	0.388281	2.72719	6.12887e-11	1.79059e-08	0.693751	0.699831	0.701088	0.698224	0.412882	0.404548	0.413977	0.410469	0.287755	1.73261	1.16438e-07	9.05234e-05	WTvsKO_0h	No
cg29253359_BC21	chr11	12038755	12038757	CG	TSS;chr11:12038682;Grb10;ENSMUST00000143386;-73;1	FALSE	-	Grb10	Grb10;Grb10	protein_coding;protein_coding	ENSMUST00000093321.11;ENSMUST00000143386.7	-1354;-72		Shore	0.52455	0.589845	0.578042	0.564146	0.189608	0.149028	0.321663	0.2201	0.344046	2.26853	3.21795e-08	7.22592e-07	0.705198	0.745896	0.77974	0.743611	0.464465	0.458589	0.542871	0.488641	0.25497	1.61085	1.2229e-05	0.000255046	WTvsKO_0h	No
cg29253361_TC21	chr11	12038786	12038788	CG	TSS;chr11:12038682;Grb10;ENSMUST00000143386;-104;2	FALSE	-	Grb10	Grb10;Grb10	protein_coding;protein_coding	ENSMUST00000093321.11;ENSMUST00000143386.7	-1385;-103		Shore	0.505762	0.60317	0.533148	0.54736	0.153128	0.138444	0.276565	0.189379	0.357981	2.44039	6.77359e-09	2.64009e-07	0.739242	0.705416	0.687245	0.710635	0.405331	0.402229	0.471319	0.426293	0.284342	1.72973	1.82854e-06	0.000141977	WTvsKO_0h	No
cg29264695_TC21	chr11	14417660	14417662	CG	PMDsoloWCGW	FALSE	+								0.50216	0.667557	0.590997	0.586905	0.194882	0.161158	0.266071	0.20737	0.379534	2.47988	2.69815e-09	1.48642e-07	0.769625	0.786822	0.808739	0.788395	0.626541	0.631746	0.669879	0.642722	0.145673	1.05276	4.57108e-05	0.000481747	WTvsKO_0h	No
cg29265042_BC21	chr11	14493828	14493830	CG	PMDsoloWCGW	FALSE	+								0.475453	0.569799	0.506957	0.517403	0.176159	0.153457	0.205926	0.178514	0.338889	2.3134	5.20558e-10	5.73996e-08	0.77431	0.745087	0.786729	0.768708	0.612923	0.565882	0.55376	0.577522	0.191187	1.28407	1.26887e-05	0.000259313	WTvsKO_0h	No
cg29269014_BC21	chr11	15480028	15480030	CG	PMDsoloWCGW	FALSE	-								0.513663	0.678707	0.559366	0.583912	0.244884	0.21649	0.291056	0.25081	0.333102	2.08887	2.33721e-08	5.85577e-07	0.814681	0.782598	0.8212	0.80616	0.715056	0.687921	0.682286	0.695087	0.111072	0.871055	0.00018725	0.00109158	WTvsKO_0h	No
cg29269120_BC21	chr11	15509191	15509193	CG	PMDsoloWCGW	FALSE	-								0.576372	0.669901	0.602452	0.616242	0.254041	0.210918	0.359047	0.274669	0.341573	2.11952	2.39435e-08	5.95043e-07	0.845508	0.814811	0.83584	0.832053	0.718438	0.676294	0.72279	0.705841	0.126212	1.04696	5.46574e-05	0.000530845	WTvsKO_0h	No
cg29269533_TC11	chr11	15617123	15617125	CG	Random	FALSE	+								0.511276	0.6266	0.587674	0.575183	0.218742	0.162018	0.19477	0.191843	0.38334	2.52604	1.6497e-10	3.02197e-08	0.737207	0.837053	0.812051	0.795437	0.658754	0.590337	0.551401	0.600164	0.195273	1.39553	0.000254826	0.00132519	WTvsKO_0h	No
cg29269572_BC21	chr11	15624059	15624061	CG	PMDsoloWCGW	FALSE	+								0.477641	0.605228	0.575384	0.552751	0.190171	0.165791	0.263554	0.206505	0.346246	2.27652	4.79704e-09	2.11383e-07	0.746169	0.778356	0.766799	0.763775	0.565681	0.576474	0.640042	0.594066	0.169709	1.14291	4.34424e-05	0.000469528	WTvsKO_0h	No
cg29298336_TC21	chr11	19998090	19998092	CG	Enhancer	FALSE	+	Spred2	Spred2;Spred2;Spred2	protein_coding;protein_coding;protein_coding	ENSMUST00000093298.11;ENSMUST00000093299.12;ENSMUST00000123036.1	73649;73716;43521			0.569623	0.661361	0.635672	0.622219	0.278842	0.222521	0.330757	0.277373	0.344846	2.12188	6.65847e-09	2.61256e-07	0.855671	0.843443	0.852549	0.850555	0.728295	0.708604	0.703431	0.713443	0.137111	1.19278	4.91302e-06	0.000182048	WTvsKO_0h	No
cg29298694_TC11	chr11	20021153	20021155	CG	SpermUnmeth	FALSE	+	Spred2	Spred2;Spred2	protein_coding;protein_coding	ENSMUST00000093298.11;ENSMUST00000093299.12	96712;96779	CGI:chr11:20020717-20021262	Island	0.678574	0.76551	0.700776	0.714953	0.182567	0.110539	0.229334	0.174147	0.540807	3.64412	2.59555e-12	1.95956e-09	0.923988	0.921031	0.921959	0.922326	0.554073	0.560776	0.651577	0.588809	0.333517	3.04701	2.06654e-08	3.64745e-05	Common	No
cg29300093_TC11	chr11	20166757	20166759	CG	Enhancer	FALSE	+								0.13434	0.261822	0.283018	0.226393	0.0372991	0.0334249	0.0282015	0.0329752	0.193418	3.04208	1.53961e-10	2.93693e-08	0.678878	0.58949	0.690249	0.652872	0.295522	0.252238	0.208794	0.252185	0.400687	2.50038	9.2405e-07	0.000130832	WTvsKO_96h	No
cg29304947_TC21	chr11	20648493	20648495	CG	EPIC;cg20757369	FALSE	-	Sertad2	Sertad2;Sertad2;Sertad2	protein_coding;protein_coding;protein_coding	ENSMUST00000093292.10;ENSMUST00000109585.1;ENSMUST00000109586.2	105160;1339;16515			0.171461	0.244284	0.259513	0.225086	0.0782791	0.0586808	0.0462559	0.0610719	0.164014	2.17087	1.01413e-08	3.41026e-07	0.64584	0.590368	0.701278	0.645829	0.369078	0.356859	0.221098	0.315678	0.330151	2.02177	4.97776e-05	0.000504273	WTvsKO_96h	No
cg29316757_TC11	chr11	22285920	22285922	CG	TSS;chr11:22285837;Ehbp1;ENSMUST00000045167;-83;2,TSS;chr11:22285871;Ehbp1;ENSMUST00000134293;-49;2	FALSE	-	Ehbp1	Ehbp1;Ehbp1;Ehbp1;Ehbp1;Ehbp1	protein_coding;protein_coding;protein_coding;protein_coding;protein_coding	ENSMUST00000045167.10;ENSMUST00000109563.8;ENSMUST00000134293.1;ENSMUST00000137594.1;ENSMUST00000180360.7	-82;875;-48;56372;875		Shore	0.614126	0.770706	0.698415	0.694416	0.393351	0.306043	0.388529	0.362641	0.331775	2.03044	5.12351e-08	9.87719e-07	0.909593	0.914262	0.916672	0.913509	0.871534	0.842796	0.769162	0.827831	0.0856784	1.09458	0.00104394	0.00334047	WTvsKO_0h	No
cg29318627_BC11	chr11	22617427	22617429	CG	lincRNATSS;chr11:22617408;Gm12052;ENSMUST00000142151;20	FALSE	-	Gm12052	Gm12052	lincRNA	ENSMUST00000142151.1	20			0.11427	0.267049	0.257794	0.213038	0.0685963	0.0351903	0.0485817	0.0507894	0.162248	2.29839	2.24795e-07	2.74859e-06	0.668199	0.61136	0.703099	0.660886	0.357012	0.351209	0.173104	0.293775	0.367111	2.2992	8.50098e-05	0.000681278	WTvsKO_96h	No
cg29321487_BC11	chr11	22971998	22972000	CG	ImprintDMR;chr11:22971610-22974212;M;DMR_U2af1_rs1,MonoallelicMeth,TSS;chr11:22972004;Zrsr1;ENSMUST00000049506;-6;1	FALSE	-	Commd1;Commd1b;Zrsr1	Commd1;Commd1;Commd1;Commd1;Commd1;Commd1b;Zrsr1;Zrsr1;Zrsr1	protein_coding;protein_coding;protein_coding;protein_coding;protein_coding;protein_coding;protein_coding;protein_coding;protein_coding	ENSMUST00000057843.11;ENSMUST00000071068.8;ENSMUST00000093270.5;ENSMUST00000159081.7;ENSMUST00000162924.1;ENSMUST00000160826.1;ENSMUST00000049506.7;ENSMUST00000229075.1;ENSMUST00000230879.1	6998;10254;10186;10384;861;10092;-6;-1229;-1216	CGI:chr11:22971974-22972993	Island	0.595451	0.536044	0.466177	0.532557	0.103328	0.102729	0.0919797	0.0993456	0.433211	3.37264	3.34568e-13	3.8164e-10	0.578716	0.526379	0.415237	0.506777	0.113511	0.0952154	0.0803216	0.0963494	0.410428	3.28245	2.23696e-07	0.000108644	Common	Yes
cg29321488_BC21	chr11	22972009	22972011	CG	ImprintDMR;chr11:22971610-22974212;M;DMR_U2af1_rs1,MonoallelicMeth	FALSE	-	Commd1;Commd1b;Zrsr1	Commd1;Commd1;Commd1;Commd1;Commd1;Commd1b;Zrsr1;Zrsr1;Zrsr1	protein_coding;protein_coding;protein_coding;protein_coding;protein_coding;protein_coding;protein_coding;protein_coding;protein_coding	ENSMUST00000057843.11;ENSMUST00000071068.8;ENSMUST00000093270.5;ENSMUST00000159081.7;ENSMUST00000162924.1;ENSMUST00000160826.1;ENSMUST00000049506.7;ENSMUST00000229075.1;ENSMUST00000230879.1	6987;10243;10175;10373;850;10081;5;-1218;-1205	CGI:chr11:22971974-22972993	Island	0.516163	0.428232	0.371959	0.438785	0.0447462	0.0439399	0.0419537	0.0435466	0.395238	4.09777	8.43362e-15	2.03983e-11	0.512419	0.434793	0.364654	0.437289	0.0536289	0.0515443	0.0523999	0.0525244	0.384764	3.80396	1.25927e-08	2.63157e-05	Common	Yes
cg29321490_TC21	chr11	22972053	22972055	CG	ImprintDMR;chr11:22971610-22974212;M;DMR_U2af1_rs1,MonoallelicMeth	FALSE	+	Commd1;Commd1b;Zrsr1	Commd1;Commd1;Commd1;Commd1;Commd1;Commd1b;Zrsr1;Zrsr1;Zrsr1	protein_coding;protein_coding;protein_coding;protein_coding;protein_coding;protein_coding;protein_coding;protein_coding;protein_coding	ENSMUST00000057843.11;ENSMUST00000071068.8;ENSMUST00000093270.5;ENSMUST00000159081.7;ENSMUST00000162924.1;ENSMUST00000160826.1;ENSMUST00000049506.7;ENSMUST00000229075.1;ENSMUST00000230879.1	6943;10199;10131;10329;806;10037;49;-1174;-1161	CGI:chr11:22971974-22972993	Island	0.450056	0.41582	0.353206	0.406361	0.0546462	0.0554654	0.0519115	0.0540077	0.352353	3.58036	4.43243e-14	7.32806e-11	0.463174	0.419789	0.345075	0.409346	0.0631187	0.0595152	0.061519	0.0613843	0.347962	3.40026	1.22454e-08	2.57964e-05	Common	Yes
cg29321497_TC21	chr11	22972130	22972132	CG	ImprintDMR;chr11:22971610-22974212;M;DMR_U2af1_rs1,MonoallelicMeth	FALSE	-	Commd1;Commd1b;Zrsr1	Commd1;Commd1;Commd1;Commd1;Commd1;Commd1b;Zrsr1;Zrsr1;Zrsr1	protein_coding;protein_coding;protein_coding;protein_coding;protein_coding;protein_coding;protein_coding;protein_coding;protein_coding	ENSMUST00000057843.11;ENSMUST00000071068.8;ENSMUST00000093270.5;ENSMUST00000159081.7;ENSMUST00000162924.1;ENSMUST00000160826.1;ENSMUST00000049506.7;ENSMUST00000229075.1;ENSMUST00000230879.1	6866;10122;10054;10252;729;9960;126;-1097;-1084	CGI:chr11:22971974-22972993	Island	0.498073	0.445977	0.405654	0.449901	0.0387339	0.0429716	0.0436679	0.0417912	0.40811	4.22936	1.17895e-15	4.59648e-12	0.514346	0.451435	0.401102	0.455628	0.0520374	0.04089	0.0556097	0.0495124	0.406115	4.01613	5.42533e-09	1.57467e-05	Common	Yes
cg29321498_BC21	chr11	22972173	22972175	CG	ImprintDMR;chr11:22971610-22974212;M;DMR_U2af1_rs1,MonoallelicMeth	FALSE	+	Commd1;Commd1b;Zrsr1	Commd1;Commd1;Commd1;Commd1;Commd1;Commd1b;Zrsr1;Zrsr1;Zrsr1	protein_coding;protein_coding;protein_coding;protein_coding;protein_coding;protein_coding;protein_coding;protein_coding;protein_coding	ENSMUST00000057843.11;ENSMUST00000071068.8;ENSMUST00000093270.5;ENSMUST00000159081.7;ENSMUST00000162924.1;ENSMUST00000160826.1;ENSMUST00000049506.7;ENSMUST00000229075.1;ENSMUST00000230879.1	6823;10079;10011;10209;686;9917;169;-1054;-1041	CGI:chr11:22971974-22972993	Island	0.43909	0.401761	0.334709	0.391853	0.0369964	0.0430549	0.0445647	0.0415387	0.350315	3.89325	1.21975e-14	2.70019e-11	0.462174	0.391804	0.348373	0.400784	0.0439866	0.0401141	0.0551706	0.0464238	0.35436	3.78805	1.10368e-08	2.44324e-05	Common	Yes
cg29321505_TC21	chr11	22972263	22972265	CG	ImprintDMR;chr11:22971610-22974212;M;DMR_U2af1_rs1,MonoallelicMeth	FALSE	-	Commd1;Commd1b;Zrsr1	Commd1;Commd1;Commd1;Commd1;Commd1;Commd1b;Zrsr1;Zrsr1;Zrsr1	protein_coding;protein_coding;protein_coding;protein_coding;protein_coding;protein_coding;protein_coding;protein_coding;protein_coding	ENSMUST00000057843.11;ENSMUST00000071068.8;ENSMUST00000093270.5;ENSMUST00000159081.7;ENSMUST00000162924.1;ENSMUST00000160826.1;ENSMUST00000049506.7;ENSMUST00000229075.1;ENSMUST00000230879.1	6733;9989;9921;10119;596;9827;259;-964;-951	CGI:chr11:22971974-22972993	Island	0.440809	0.381989	0.333982	0.385593	0.0429273	0.0536167	0.0454797	0.0473412	0.338252	3.65958	5.07965e-14	8.14049e-11	0.439279	0.389713	0.334091	0.387694	0.0543301	0.0609756	0.0500811	0.0551289	0.332565	3.43918	9.87305e-09	2.30662e-05	Common	Yes
cg29321506_TC21	chr11	22972319	22972321	CG	ImprintDMR;chr11:22971610-22974212;M;DMR_U2af1_rs1,MonoallelicMeth	FALSE	+	Commd1;Commd1b;Zrsr1	Commd1;Commd1;Commd1;Commd1;Commd1;Commd1b;Zrsr1;Zrsr1;Zrsr1	protein_coding;protein_coding;protein_coding;protein_coding;protein_coding;protein_coding;protein_coding;protein_coding;protein_coding	ENSMUST00000057843.11;ENSMUST00000071068.8;ENSMUST00000093270.5;ENSMUST00000159081.7;ENSMUST00000162924.1;ENSMUST00000160826.1;ENSMUST00000049506.7;ENSMUST00000229075.1;ENSMUST00000230879.1	6677;9933;9865;10063;540;9771;315;-908;-895	CGI:chr11:22971974-22972993	Island	0.440028	0.399342	0.329312	0.38956	0.0441937	0.0403211	0.0509449	0.0451532	0.344407	3.75479	3.47238e-14	6.00697e-11	0.457101	0.388304	0.347076	0.397494	0.0674302	0.0694234	0.0666481	0.0678339	0.32966	3.17557	1.53186e-08	2.93144e-05	WTvsKO_0h	Yes
cg29321531_TC21	chr11	22972634	22972636	CG	ImprintDMR;chr11:22971610-22974212;M;DMR_U2af1_rs1,MonoallelicMeth	FALSE	-	Commd1;Commd1b;Zrsr1	Commd1;Commd1;Commd1;Commd1;Commd1;Commd1b;Zrsr1;Zrsr1;Zrsr1	protein_coding;protein_coding;protein_coding;protein_coding;protein_coding;protein_coding;protein_coding;protein_coding;protein_coding	ENSMUST00000057843.11;ENSMUST00000071068.8;ENSMUST00000093270.5;ENSMUST00000159081.7;ENSMUST00000162924.1;ENSMUST00000160826.1;ENSMUST00000049506.7;ENSMUST00000229075.1;ENSMUST00000230879.1	6362;9618;9550;9748;225;9456;630;-593;-580	CGI:chr11:22971974-22972993	Island	0.550965	0.498516	0.452657	0.500713	0.0296485	0.0344974	0.0349318	0.0330259	0.467687	4.87992	6.82694e-17	6.60492e-13	0.540073	0.488603	0.4341	0.487592	0.0352197	0.0430935	0.0421342	0.0401491	0.447443	4.51293	7.69051e-10	4.47749e-06	Common	Yes
cg29321532_TC11	chr11	22972645	22972647	CG	ImprintDMR;chr11:22971610-22974212;M;DMR_U2af1_rs1,MonoallelicMeth	FALSE	+	Commd1;Commd1b;Zrsr1	Commd1;Commd1;Commd1;Commd1;Commd1;Commd1b;Zrsr1;Zrsr1;Zrsr1	protein_coding;protein_coding;protein_coding;protein_coding;protein_coding;protein_coding;protein_coding;protein_coding;protein_coding	ENSMUST00000057843.11;ENSMUST00000071068.8;ENSMUST00000093270.5;ENSMUST00000159081.7;ENSMUST00000162924.1;ENSMUST00000160826.1;ENSMUST00000049506.7;ENSMUST00000229075.1;ENSMUST00000230879.1	6351;9607;9539;9737;214;9445;641;-582;-569	CGI:chr11:22971974-22972993	Island	0.562416	0.497697	0.473499	0.511204	0.00820727	0	0.0029445	0.00371726	0.507487	7.72549	4.45267e-17	4.85752e-13	0.513964	0.47925	0.439825	0.47768	0.0188345	0.00787442	0.00435428	0.0103544	0.467325	6.70972	6.55766e-08	7.04099e-05	Common	Yes
cg29321544_BC11	chr11	22972808	22972810	CG	ImprintDMR;chr11:22971610-22974212;M;DMR_U2af1_rs1,MonoallelicMeth	FALSE	+	Commd1;Commd1b;Zrsr1	Commd1;Commd1;Commd1;Commd1;Commd1;Commd1b;Zrsr1;Zrsr1;Zrsr1	protein_coding;protein_coding;protein_coding;protein_coding;protein_coding;protein_coding;protein_coding;protein_coding;protein_coding	ENSMUST00000057843.11;ENSMUST00000071068.8;ENSMUST00000093270.5;ENSMUST00000159081.7;ENSMUST00000162924.1;ENSMUST00000160826.1;ENSMUST00000049506.7;ENSMUST00000229075.1;ENSMUST00000230879.1	6188;9444;9376;9574;51;9282;804;-419;-406	CGI:chr11:22971974-22972993	Island	0.543396	0.497093	0.44776	0.496083	0.013377	0.018684	0.0108633	0.0143081	0.481775	6.11996	2.75157e-18	8.85832e-14	0.532103	0.500926	0.416936	0.483322	0.0082474	0.0132613	0.00853105	0.0100133	0.473308	6.565	2.64699e-10	4.02383e-06	Common	Yes
cg29321546_BC11	chr11	22972836	22972838	CG	ImprintDMR;chr11:22971610-22974212;M;DMR_U2af1_rs1,MonoallelicMeth	FALSE	+	Commd1;Commd1b;Zrsr1	Commd1;Commd1;Commd1;Commd1;Commd1;Commd1b;Zrsr1;Zrsr1;Zrsr1	protein_coding;protein_coding;protein_coding;protein_coding;protein_coding;protein_coding;protein_coding;protein_coding;protein_coding	ENSMUST00000057843.11;ENSMUST00000071068.8;ENSMUST00000093270.5;ENSMUST00000159081.7;ENSMUST00000162924.1;ENSMUST00000160826.1;ENSMUST00000049506.7;ENSMUST00000229075.1;ENSMUST00000230879.1	6160;9416;9348;9546;23;9254;832;-391;-378	CGI:chr11:22971974-22972993	Island	0.544727	0.516492	0.467875	0.509698	0.0232972	0.023693	0.0216628	0.0228843	0.486814	5.4733	3.05203e-18	8.85832e-14	0.527995	0.507448	0.436706	0.490716	0.0277915	0.0242216	0.0211228	0.0243786	0.466338	5.27749	1.70836e-10	3.82606e-06	Common	Yes
cg29321548_BC11	chr11	22972854	22972856	CG	ImprintDMR;chr11:22971610-22974212;M;DMR_U2af1_rs1,MonoallelicMeth	FALSE	+	Commd1;Commd1b;Zrsr1	Commd1;Commd1;Commd1;Commd1;Commd1;Commd1b;Zrsr1;Zrsr1;Zrsr1	protein_coding;protein_coding;protein_coding;protein_coding;protein_coding;protein_coding;protein_coding;protein_coding;protein_coding	ENSMUST00000057843.11;ENSMUST00000071068.8;ENSMUST00000093270.5;ENSMUST00000159081.7;ENSMUST00000162924.1;ENSMUST00000160826.1;ENSMUST00000049506.7;ENSMUST00000229075.1;ENSMUST00000230879.1	6142;9398;9330;9528;5;9236;850;-373;-360	CGI:chr11:22971974-22972993	Island	0.52175	0.496252	0.454958	0.490987	0.0131006	0.00894563	0.00904052	0.0103623	0.480624	6.54881	1.85512e-19	2.13986e-14	0.544386	0.500112	0.423646	0.489381	0.0108989	0.0100489	0.00742094	0.00945625	0.479925	6.66764	1.06821e-10	3.67218e-06	Common	Yes
cg29321552_TC21	chr11	22972893	22972895	CG	ImprintDMR;chr11:22971610-22974212;M;DMR_U2af1_rs1,MonoallelicMeth	FALSE	-	Commd1;Commd1b;Zrsr1	Commd1;Commd1;Commd1;Commd1;Commd1;Commd1b;Zrsr1;Zrsr1;Zrsr1	protein_coding;protein_coding;protein_coding;protein_coding;protein_coding;protein_coding;protein_coding;protein_coding;protein_coding	ENSMUST00000057843.11;ENSMUST00000071068.8;ENSMUST00000093270.5;ENSMUST00000159081.7;ENSMUST00000162924.1;ENSMUST00000160826.1;ENSMUST00000049506.7;ENSMUST00000229075.1;ENSMUST00000230879.1	6103;9359;9291;9489;-34;9197;889;-334;-321	CGI:chr11:22971974-22972993	Island	0.447023	0.40259	0.365773	0.405129	0.0395745	0.0414236	0.0435619	0.04152	0.363609	3.9732	3.48241e-15	1.05776e-11	0.445949	0.406045	0.361344	0.404446	0.0475874	0.04907	0.0456939	0.0474504	0.356995	3.76674	1.08836e-09	5.68605e-06	Common	Yes
cg29321553_BC11	chr11	22972903	22972905	CG	ImprintDMR;chr11:22971610-22974212;M;DMR_U2af1_rs1,MonoallelicMeth	FALSE	-	Commd1;Commd1b;Zrsr1	Commd1;Commd1;Commd1;Commd1;Commd1;Commd1b;Zrsr1;Zrsr1;Zrsr1	protein_coding;protein_coding;protein_coding;protein_coding;protein_coding;protein_coding;protein_coding;protein_coding;protein_coding	ENSMUST00000057843.11;ENSMUST00000071068.8;ENSMUST00000093270.5;ENSMUST00000159081.7;ENSMUST00000162924.1;ENSMUST00000160826.1;ENSMUST00000049506.7;ENSMUST00000229075.1;ENSMUST00000230879.1	6093;9349;9281;9479;-44;9187;899;-324;-311	CGI:chr11:22971974-22972993	Island	0.587777	0.566691	0.518218	0.557562	0.0117078	0.00933657	0.00411542	0.00838658	0.549176	7.35058	3.42688e-18	8.95166e-14	0.553221	0.555778	0.49221	0.533736	0.0125459	0.00710707	0.0123587	0.0106706	0.523066	6.7772	1.89962e-10	3.82606e-06	Common	Yes
cg29321554_TC21	chr11	22972923	22972925	CG	ImprintDMR;chr11:22971610-22974212;M;DMR_U2af1_rs1,MonoallelicMeth	FALSE	-	Commd1;Commd1b;Zrsr1	Commd1;Commd1;Commd1;Commd1;Commd1;Commd1b;Zrsr1;Zrsr1;Zrsr1	protein_coding;protein_coding;protein_coding;protein_coding;protein_coding;protein_coding;protein_coding;protein_coding;protein_coding	ENSMUST00000057843.11;ENSMUST00000071068.8;ENSMUST00000093270.5;ENSMUST00000159081.7;ENSMUST00000162924.1;ENSMUST00000160826.1;ENSMUST00000049506.7;ENSMUST00000229075.1;ENSMUST00000230879.1	6073;9329;9261;9459;-64;9167;919;-304;-291	CGI:chr11:22971974-22972993	Island	0.496967	0.464955	0.425915	0.462612	0.0173645	0.0209286	0.0237637	0.0206856	0.441927	5.35998	8.57888e-18	1.86747e-13	0.566526	0.480577	0.442258	0.496454	0.0195804	0.0257511	0.021438	0.0222565	0.474197	5.44642	3.9752e-10	4.41944e-06	Common	Yes
cg29321557_TC21	chr11	22972951	22972953	CG	ImprintDMR;chr11:22971610-22974212;M;DMR_U2af1_rs1,MonoallelicMeth	FALSE	-	Commd1;Commd1b;Zrsr1	Commd1;Commd1;Commd1;Commd1;Commd1;Commd1b;Zrsr1;Zrsr1;Zrsr1	protein_coding;protein_coding;protein_coding;protein_coding;protein_coding;protein_coding;protein_coding;protein_coding;protein_coding	ENSMUST00000057843.11;ENSMUST00000071068.8;ENSMUST00000093270.5;ENSMUST00000159081.7;ENSMUST00000162924.1;ENSMUST00000160826.1;ENSMUST00000049506.7;ENSMUST00000229075.1;ENSMUST00000230879.1	6045;9301;9233;9431;-92;9139;947;-276;-263	CGI:chr11:22971974-22972993	Island	0.572574	0.549544	0.48521	0.535776	0.0339206	0.029698	0.0324823	0.0320336	0.503743	5.12724	1.76972e-17	2.96318e-13	0.609248	0.529961	0.47625	0.538486	0.0394429	0.0345199	0.0373494	0.0371041	0.501382	4.92545	7.65717e-10	4.47749e-06	Common	Yes
cg29321563_BC11	chr11	22973120	22973122	CG	ImprintDMR;chr11:22971610-22974212;M;DMR_U2af1_rs1	FALSE	-	Commd1;Commd1b;Zrsr1	Commd1;Commd1;Commd1;Commd1;Commd1;Commd1b;Zrsr1;Zrsr1;Zrsr1	protein_coding;protein_coding;protein_coding;protein_coding;protein_coding;protein_coding;protein_coding;protein_coding;protein_coding	ENSMUST00000057843.11;ENSMUST00000071068.8;ENSMUST00000093270.5;ENSMUST00000159081.7;ENSMUST00000162924.1;ENSMUST00000160826.1;ENSMUST00000049506.7;ENSMUST00000229075.1;ENSMUST00000230879.1	5876;9132;9064;9262;-261;8970;1116;-107;-94		Shore	0.528291	0.501169	0.460865	0.496775	0.00679767	0.00645611	0.00586604	0.00637327	0.490402	7.26849	5.4902e-21	1.43414e-15	0.543411	0.539774	0.448106	0.51043	0.00551989	0.00574381	0.0070521	0.00610527	0.504325	7.41558	1.05589e-11	1.89435e-06	Common	Yes
cg29321579_BC21	chr11	22973364	22973366	CG	ImprintDMR;chr11:22971610-22974212;M;DMR_U2af1_rs1,MonoallelicMeth	FALSE	-	Commd1;Commd1b;Zrsr1	Commd1;Commd1;Commd1;Commd1;Commd1;Commd1b;Zrsr1;Zrsr1;Zrsr1	protein_coding;protein_coding;protein_coding;protein_coding;protein_coding;protein_coding;protein_coding;protein_coding;protein_coding	ENSMUST00000057843.11;ENSMUST00000071068.8;ENSMUST00000093270.5;ENSMUST00000159081.7;ENSMUST00000162924.1;ENSMUST00000160826.1;ENSMUST00000049506.7;ENSMUST00000229075.1;ENSMUST00000230879.1	5632;8888;8820;9018;-505;8726;1360;137;150		Shore	0.410209	0.373765	0.322657	0.368877	0.034515	0.0419621	0.0393459	0.0386077	0.330269	3.86343	9.83139e-15	2.29299e-11	0.427994	0.371363	0.302929	0.367429	0.0461675	0.0462598	0.0462993	0.0462422	0.321186	3.57295	1.19434e-08	2.53646e-05	WTvsKO_0h	Yes
cg29321583_BC11	chr11	22973459	22973461	CG	ImprintDMR;chr11:22971610-22974212;M;DMR_U2af1_rs1,MonoallelicMeth	FALSE	-	Commd1;Commd1b;Zrsr1	Commd1;Commd1;Commd1;Commd1;Commd1;Commd1b;Zrsr1;Zrsr1;Zrsr1	protein_coding;protein_coding;protein_coding;protein_coding;protein_coding;protein_coding;protein_coding;protein_coding;protein_coding	ENSMUST00000057843.11;ENSMUST00000071068.8;ENSMUST00000093270.5;ENSMUST00000159081.7;ENSMUST00000162924.1;ENSMUST00000160826.1;ENSMUST00000049506.7;ENSMUST00000229075.1;ENSMUST00000230879.1	5537;8793;8725;8923;-600;8631;1455;232;245		Shore	0.487919	0.472468	0.431018	0.463801	0.0293089	0.0235375	0.0253487	0.026065	0.437736	5.01988	2.04186e-17	2.96318e-13	0.513708	0.473497	0.410532	0.465912	0.0491239	0.0542439	0.0530374	0.0521351	0.413777	3.98701	1.4046e-09	6.79463e-06	Common	Yes
cg29321588_BC11	chr11	22973669	22973671	CG	ImprintDMR;chr11:22971610-22974212;M;DMR_U2af1_rs1,MonoallelicMeth	FALSE	-	Commd1;Commd1b;Zrsr1	Commd1;Commd1;Commd1;Commd1;Commd1;Commd1b;Zrsr1;Zrsr1;Zrsr1	protein_coding;protein_coding;protein_coding;protein_coding;protein_coding;protein_coding;protein_coding;protein_coding;protein_coding	ENSMUST00000057843.11;ENSMUST00000071068.8;ENSMUST00000093270.5;ENSMUST00000159081.7;ENSMUST00000162924.1;ENSMUST00000160826.1;ENSMUST00000049506.7;ENSMUST00000229075.1;ENSMUST00000230879.1	5327;8583;8515;8713;-810;8421;1665;442;455		Shore	0.468011	0.434761	0.41593	0.439567	0.0365384	0.0379767	0.0337191	0.0360781	0.403489	4.39038	2.59532e-16	1.73832e-12	0.498944	0.442765	0.374204	0.438638	0.0821296	0.0685703	0.059817	0.0701723	0.368465	3.38024	3.95129e-08	5.2661e-05	Common	Yes
cg29321591_BC21	chr11	22973738	22973740	CG	ImprintDMR;chr11:22971610-22974212;M;DMR_U2af1_rs1,MonoallelicMeth	FALSE	-	Commd1;Commd1b;Zrsr1	Commd1;Commd1;Commd1;Commd1;Commd1;Commd1b;Zrsr1;Zrsr1;Zrsr1	protein_coding;protein_coding;protein_coding;protein_coding;protein_coding;protein_coding;protein_coding;protein_coding;protein_coding	ENSMUST00000057843.11;ENSMUST00000071068.8;ENSMUST00000093270.5;ENSMUST00000159081.7;ENSMUST00000162924.1;ENSMUST00000160826.1;ENSMUST00000049506.7;ENSMUST00000229075.1;ENSMUST00000230879.1	5258;8514;8446;8644;-879;8352;1734;511;524		Shore	0.427778	0.388374	0.333593	0.383249	0.0397141	0.0388061	0.0438711	0.0407971	0.342451	3.86628	9.24879e-15	2.17654e-11	0.466445	0.395127	0.353351	0.404974	0.0789545	0.074754	0.0649376	0.072882	0.332092	3.11387	3.24217e-08	4.65341e-05	Common	Yes
cg29321608_BC21	chr11	22974381	22974383	CG	GeneBody;Zrsr1;NM_011663;inside_[cds_in_exon_1];splice=0	FALSE	-	Commd1;Commd1b;Zrsr1	Commd1;Commd1;Commd1;Commd1;Commd1b;Zrsr1;Zrsr1;Zrsr1	protein_coding;protein_coding;protein_coding;protein_coding;protein_coding;protein_coding;protein_coding;protein_coding	ENSMUST00000057843.11;ENSMUST00000071068.8;ENSMUST00000093270.5;ENSMUST00000159081.7;ENSMUST00000160826.1;ENSMUST00000049506.7;ENSMUST00000229075.1;ENSMUST00000230879.1	4615;7871;7803;8001;7709;2377;1154;1167		Shore	0.454599	0.458932	0.445381	0.452971	0.0998564	0.0962975	0.155058	0.117071	0.3359	2.67728	5.38794e-11	1.64805e-08	0.651017	0.67009	0.627035	0.649381	0.361113	0.364678	0.341221	0.355671	0.29371	1.74813	2.76001e-07	0.000111382	WTvsKO_0h	No
cg29337254_TC21	chr11	25232680	25232682	CG	lincRNATSS;chr11:25232626;4933427E13Rik;ENSMUST00000191131;55	FALSE	-	4933427E13Rik	4933427E13Rik	lincRNA	ENSMUST00000191131.1	55			0.499547	0.646868	0.592813	0.579743	0.236314	0.178676	0.283262	0.23275	0.346992	2.21491	1.09179e-08	3.56005e-07	0.78656	0.788352	0.799177	0.791363	0.62447	0.582294	0.617718	0.608161	0.183202	1.28874	3.48496e-06	0.000166123	WTvsKO_0h	No
cg29349621_TC11	chr11	27731550	27731552	CG	PMDsoloWCGW	FALSE	+								0.650649	0.731645	0.678712	0.687002	0.234087	0.20163	0.346973	0.260897	0.426105	2.67698	3.5977e-10	4.69425e-08	0.856292	0.86576	0.84962	0.857224	0.764276	0.712796	0.766143	0.747738	0.109486	1.01398	7.77321e-05	0.000648045	WTvsKO_0h	No
cg29354594_BC11	chr11	28948186	28948188	CG	Random	FALSE	+								0.654971	0.697313	0.700282	0.684189	0.339845	0.267131	0.384538	0.330504	0.353684	2.1485	3.07076e-09	1.61105e-07	0.784919	0.838519	0.824055	0.815831	0.747283	0.715524	0.697892	0.720233	0.0955982	0.789667	0.00110241	0.00346948	WTvsKO_0h	No
cg29370431_BC11	chr11	31542733	31542735	CG	Enhancer	FALSE	+								0.64105	0.701533	0.637876	0.660153	0.344503	0.276805	0.354023	0.325111	0.335042	2.02254	5.54132e-09	2.32083e-07	0.812056	0.822919	0.814257	0.816411	0.693512	0.630332	0.656541	0.660128	0.156282	1.19236	1.39827e-05	0.000270792	WTvsKO_0h	No
cg29386560_BC21	chr11	33159206	33159208	CG	GeneBody;Npm1;NM_001252260;inside_[intron_between_exon_6_and_7];splice=0	FALSE	+	Npm1	Npm1;Npm1;Npm1;Npm1	protein_coding;protein_coding;protein_coding;protein_coding	ENSMUST00000075641.9;ENSMUST00000093201.12;ENSMUST00000101375.4;ENSMUST00000109354.9	4000;3866;3870;3871		Shelf	0.197693	0.274386	0.335426	0.269168	0.0553306	0.0424258	0.104814	0.0675235	0.201645	2.42469	3.60665e-08	7.81263e-07	0.709356	0.725502	0.775813	0.73689	0.338317	0.319564	0.428955	0.362278	0.374612	2.31712	1.15073e-06	0.000134404	WTvsKO_96h	No
cg29408747_TC11	chr11	35616867	35616869	CG	miRNA;chr11:35616816;Mir218-2;ENSMUST00000083649;52;1	FALSE	+	Mir218-2;Slit3	Mir218-2;Slit3	miRNA;protein_coding	ENSMUST00000083649.1;ENSMUST00000069837.3	52;495644			0.65033	0.746545	0.696304	0.697726	0.377477	0.290869	0.342307	0.336884	0.360842	2.2001	2.1616e-09	1.29984e-07	0.918741	0.907676	0.933018	0.919812	0.716471	0.701599	0.657161	0.691744	0.228068	2.36234	1.86878e-07	0.000106403	WTvsKO_0h	No
cg29418597_BC21	chr11	36485127	36485129	CG	Enhancer	FALSE	+	Tenm2	Tenm2;Tenm2;Tenm2;Tenm2;Tenm2;Tenm2	protein_coding;protein_coding;protein_coding;protein_coding;protein_coding;protein_coding	ENSMUST00000057207.5;ENSMUST00000102801.7;ENSMUST00000146113.7;ENSMUST00000149787.7;ENSMUST00000155147.1;ENSMUST00000163524.7	459039;750755;459039;192618;10012;459039			0.632861	0.705626	0.670028	0.669505	0.339199	0.281363	0.310102	0.310221	0.359284	2.17908	9.06031e-10	7.87596e-08	0.843175	0.804497	0.822817	0.823496	0.673647	0.641846	0.531871	0.615788	0.207709	1.53718	5.85788e-05	0.000551819	WTvsKO_0h	No
cg29423414_TC11	chr11	37140592	37140594	CG	Adenoma	FALSE	+	Tenm2	Tenm2;Tenm2	protein_coding;protein_coding	ENSMUST00000102801.7;ENSMUST00000157030.1	95290;95372			0.428889	0.631239	0.520217	0.526781	0.177692	0.147806	0.190981	0.172159	0.354622	2.4332	2.46316e-09	1.40295e-07	0.745392	0.82108	0.811757	0.792743	0.680379	0.609104	0.559691	0.616391	0.176352	1.26013	0.00034237	0.00160181	WTvsKO_0h	No
cg29424553_TC21	chr11	37329858	37329860	CG	Adenoma	FALSE	+								0.563662	0.687067	0.600259	0.616996	0.256979	0.207294	0.341799	0.268691	0.348305	2.16758	1.87013e-08	5.04976e-07	0.853414	0.83064	0.830638	0.838231	0.699785	0.66032	0.703439	0.687848	0.150383	1.23458	1.06178e-05	0.000241426	WTvsKO_0h	No
cg29426227_TC21	chr11	37659399	37659401	CG	lincRNATSS;chr11:37658989;Gm12128;ENSMUST00000131013;411	FALSE	-	Gm12128	Gm12128	lincRNA	ENSMUST00000131013.1	411			0.696812	0.740269	0.703726	0.713602	0.350327	0.319014	0.429737	0.366359	0.347243	2.11762	2.89278e-09	1.55228e-07	0.880396	0.875548	0.877424	0.877789	0.770233	0.737759	0.781014	0.763002	0.114787	1.15406	1.24486e-05	0.000256899	WTvsKO_0h	No
cg29429740_BC21	chr11	38408400	38408402	CG	PlacentaIntermed	FALSE	-								0.60731	0.749053	0.617373	0.657912	0.270298	0.21792	0.365827	0.284682	0.37323	2.32231	1.80147e-08	4.92934e-07	0.795464	0.862117	0.831943	0.829841	0.701274	0.673124	0.718642	0.69768	0.132161	1.09509	0.000210441	0.00117415	WTvsKO_0h	No
cg29430995_BC11	chr11	38671764	38671766	CG	Random	FALSE	+								0.710269	0.776129	0.747035	0.744478	0.242779	0.237245	0.35497	0.278331	0.466146	2.9457	1.99982e-11	8.76494e-09	0.861177	0.869829	0.855927	0.862311	0.735483	0.657124	0.720207	0.704271	0.15804	1.38874	1.16822e-05	0.000250493	WTvsKO_0h	No
cg29431130_BC21	chr11	38694503	38694505	CG	PMDsoloWCGW	FALSE	-								0.496612	0.660135	0.592778	0.583175	0.185613	0.202819	0.273089	0.220507	0.362668	2.33349	4.3509e-09	1.99113e-07	0.758556	0.788851	0.79357	0.780325	0.644536	0.638654	0.673815	0.652335	0.12799	0.92296	9.14671e-05	0.000711038	WTvsKO_0h	No
cg29431420_BC21	chr11	38758722	38758724	CG	Adenoma	FALSE	+								0.467589	0.592	0.53632	0.53197	0.180815	0.161837	0.229741	0.190798	0.341172	2.28579	1.66037e-09	1.11639e-07	0.707976	0.784844	0.773155	0.755325	0.548515	0.545172	0.538467	0.544051	0.211274	1.38301	1.59965e-05	0.000286953	WTvsKO_0h	No
cg29432311_BC21	chr11	38944880	38944882	CG	PMDsoloWCGW	FALSE	+								0.629599	0.7337	0.66333	0.675543	0.302955	0.278276	0.350916	0.310716	0.364827	2.22341	1.73831e-09	1.14493e-07	0.823962	0.836039	0.854238	0.838079	0.774984	0.73174	0.782812	0.763179	0.0749007	0.682121	0.00175293	0.00478	WTvsKO_0h	No
cg29432518_BC21	chr11	38999419	38999421	CG	PMDsoloWCGW	FALSE	-								0.527343	0.646382	0.592526	0.58875	0.157482	0.138307	0.231877	0.175889	0.412861	2.78504	1.23233e-10	2.64727e-08	0.814994	0.829854	0.861624	0.835491	0.593697	0.576958	0.604361	0.591672	0.243819	1.81924	8.23166e-07	0.000128621	WTvsKO_0h	No
cg29432725_TC11	chr11	39048105	39048107	CG	Random	FALSE	+								0.635287	0.731947	0.59941	0.655548	0.282178	0.267704	0.357076	0.302319	0.353229	2.1595	9.0587e-09	3.16692e-07	0.82087	0.799341	0.817877	0.812696	0.672436	0.580001	0.681932	0.644789	0.167906	1.2512	6.71161e-05	0.000596004	WTvsKO_0h	No
cg29433200_TC21	chr11	39170760	39170762	CG	PMDsoloWCGW	FALSE	-								0.692796	0.734412	0.68911	0.705439	0.333419	0.261917	0.407301	0.334212	0.371227	2.27476	2.28595e-09	1.3476e-07	0.817754	0.824335	0.841322	0.827804	0.749638	0.725195	0.742093	0.738975	0.0888286	0.765286	0.000241406	0.00128192	WTvsKO_0h	No
cg29434689_TC21	chr11	39543561	39543563	CG	Adenoma	FALSE	+								0.482876	0.613131	0.495453	0.530486	0.15953	0.135999	0.19561	0.163713	0.366773	2.54799	3.28359e-10	4.44884e-08	0.719668	0.755749	0.773669	0.749695	0.512771	0.433638	0.478055	0.474822	0.274874	1.73375	2.22022e-06	0.000147913	WTvsKO_0h	No
cg29440973_TC11	chr11	40695384	40695386	CG	TSS;chr11:40695202;Mat2b;ENSMUST00000101347;-182;2	FALSE	+	Mat2b	Mat2b;Mat2b	protein_coding;protein_coding	ENSMUST00000101347.9;ENSMUST00000135617.1	-181;-397		Shore	0.227038	0.318011	0.346627	0.297225	0.120992	0.11489	0.077695	0.104526	0.1927	1.86442	1.57555e-07	2.12892e-06	0.631462	0.607422	0.642292	0.627058	0.343201	0.289874	0.2075	0.280192	0.346867	2.1378	5.46124e-06	0.000189184	WTvsKO_96h	No
cg29443566_BC11	chr11	41121755	41121757	CG	MonoallelicMeth	FALSE	+								0.397483	0.552231	0.489424	0.479713	0.102389	0.100473	0.172525	0.125129	0.354584	2.73256	4.69568e-10	5.43302e-08	0.766493	0.807682	0.736358	0.770178	0.644202	0.504973	0.575578	0.574917	0.19526	1.31409	0.000239959	0.0012767	WTvsKO_0h	No
cg29447045_BC11	chr11	41867448	41867450	CG	MonoallelicMeth	FALSE	+	A230004M16Rik	A230004M16Rik	processed_transcript	ENSMUST00000155032.7	157107			0.471662	0.614903	0.564338	0.550301	0.146239	0.133865	0.202691	0.160932	0.389369	2.69998	1.71107e-10	3.08726e-08	0.748156	0.816179	0.802156	0.78883	0.620685	0.583361	0.591089	0.598378	0.190452	1.33775	2.36679e-05	0.000344143	WTvsKO_0h	No
cg29447701_BC21	chr11	42000237	42000239	CG	TSS;chr11:42000355;Gabrg2;ENSMUST00000109290;+118;2	FALSE	-	Gabrg2	Gabrg2;Gabrg2;Gabrg2	protein_coding;protein_coding;protein_coding	ENSMUST00000070725.10;ENSMUST00000070735.9;ENSMUST00000109290.1	620;295;119			0.596796	0.657563	0.600131	0.618163	0.329122	0.224182	0.305132	0.286145	0.332018	2.03285	1.04531e-08	3.47222e-07	0.79676	0.824446	0.79909	0.806765	0.694386	0.615344	0.55024	0.61999	0.186775	1.34717	0.000130951	0.000876993	WTvsKO_0h	No
cg29449069_TC21	chr11	42279337	42279339	CG	Random	FALSE	-								0.612021	0.677188	0.628953	0.639387	0.278104	0.25176	0.358982	0.296282	0.343105	2.09063	5.42073e-09	2.28813e-07	0.848394	0.833441	0.853503	0.845113	0.707248	0.684357	0.688912	0.693505	0.151607	1.27133	3.5774e-06	0.000168007	WTvsKO_0h	No
cg29450018_TC21	chr11	42454915	42454917	CG	Adenoma	FALSE	-	Gabrb2	Gabrb2;Gabrb2;Gabrb2;Gabrb2	protein_coding;protein_coding;protein_coding;protein_coding	ENSMUST00000007797.9;ENSMUST00000136050.7;ENSMUST00000143626.1;ENSMUST00000192403.1	35159;33637;33606;33566			0.535993	0.720253	0.602532	0.619593	0.26346	0.222284	0.366941	0.284228	0.335364	2.08315	1.61667e-07	2.16789e-06	0.831979	0.853714	0.843164	0.842952	0.691233	0.67771	0.684457	0.684467	0.158485	1.30911	2.43213e-06	0.000150669	WTvsKO_0h	No
cg29469091_TC21	chr11	44863931	44863933	CG	Enhancer	FALSE	+	Ebf1	Ebf1;Ebf1;Ebf1	protein_coding;protein_coding;protein_coding	ENSMUST00000081265.11;ENSMUST00000101326.9;ENSMUST00000109268.1	246615;246615;246615			0.168848	0.313007	0.324488	0.268781	0.0800384	0.0857825	0.0798583	0.0818931	0.186888	1.99054	1.46861e-07	2.02614e-06	0.754296	0.704958	0.765751	0.741668	0.42744	0.453622	0.259095	0.380053	0.361616	2.26319	2.99791e-05	0.000386704	WTvsKO_96h	No
cg29479101_BC11	chr11	46065361	46065363	CG	Enhancer	FALSE	+	Adam19	Adam19	protein_coding	ENSMUST00000011400.7	9370			0.174562	0.316691	0.289195	0.260149	0.125784	0.0994979	0.116431	0.113905	0.146245	1.41686	1.36059e-05	5.70529e-05	0.767136	0.728688	0.799783	0.765202	0.385864	0.437001	0.349368	0.390744	0.374458	2.35881	4.66937e-07	0.000122103	WTvsKO_96h	No
cg29492997_TC11	chr11	48166926	48166928	CG	Random	FALSE	-								0.693739	0.790995	0.741357	0.74203	0.389609	0.333637	0.403238	0.375495	0.366535	2.27674	1.14109e-09	8.95513e-08	0.866159	0.87657	0.871832	0.87152	0.745729	0.742911	0.708146	0.732262	0.139259	1.30877	3.68999e-06	0.000168936	WTvsKO_0h	No
cg29497074_TC21	chr11	48815317	48815319	CG	GeneBody;Trim41;NM_145377;inside_[intron_between_exon_1_and_2];splice=0	FALSE	-	Trim41	Trim41;Trim41;Trim41	protein_coding;protein_coding;protein_coding	ENSMUST00000047145.13;ENSMUST00000138019.1;ENSMUST00000140800.1	2036;914;1636		Shore	0.510801	0.632419	0.587941	0.577053	0.160992	0.128881	0.264325	0.184733	0.392321	2.65775	1.65534e-09	1.11449e-07	0.852611	0.815986	0.852522	0.840373	0.68417	0.662884	0.687655	0.678236	0.162136	1.32765	7.90684e-06	0.000214765	WTvsKO_0h	No
cg29500349_TC11	chr11	49215277	49215279	CG	Random	FALSE	-	Zfp62	Zfp62;Zfp62;Zfp62;Zfp62;Zfp62;Zfp62;Zfp62;Zfp62	protein_coding;protein_coding;protein_coding;protein_coding;protein_coding;protein_coding;protein_coding;protein_coding	ENSMUST00000061757.3;ENSMUST00000109197.7;ENSMUST00000109198.7;ENSMUST00000136539.1;ENSMUST00000136691.1;ENSMUST00000137061.8;ENSMUST00000151228.1;ENSMUST00000180016.1	729;11780;11986;10959;1686;11982;11772;2590			0.628671	0.710332	0.666026	0.668343	0.341463	0.259697	0.382261	0.327807	0.340536	2.06694	1.14265e-08	3.67001e-07	0.89522	0.867096	0.87251	0.878275	0.835566	0.764195	0.810221	0.803327	0.0749479	0.813295	0.00187678	0.00501337	WTvsKO_0h	No
cg29501252_BC11	chr11	49323652	49323654	CG	TSS;chr11:49322741;Olfr1391;ENSMUST00000215671;+911;2	FALSE	+	Olfr1391	Olfr1391	protein_coding	ENSMUST00000215671.1	911			0.450769	0.537729	0.537906	0.508801	0.148266	0.140656	0.208412	0.165778	0.343023	2.40362	5.8491e-10	6.14378e-08	0.679947	0.761496	0.755597	0.732347	0.53333	0.487239	0.506888	0.509152	0.223194	1.41052	2.17485e-05	0.000330765	WTvsKO_0h	No
cg29502436_TC21	chr11	49528004	49528006	CG	TSS;chr11:49528246;Olfr1382;ENSMUST00000213152-ENSMUST00000213707;-242;2,TSS;chr11:49528284;Olfr1382;ENSMUST00000217564;-280;2,TSS;chr11:49528344;Olfr1382;ENSMUST00000213899;-340;2	FALSE	+	Olfr1382	Olfr1382;Olfr1382;Olfr1382;Olfr1382	protein_coding;protein_coding;protein_coding;protein_coding	ENSMUST00000213152.1;ENSMUST00000213707.1;ENSMUST00000213899.1;ENSMUST00000217564.1	-242;-242;-340;-280			0.597087	0.639736	0.57525	0.604024	0.248861	0.230024	0.284193	0.254359	0.349665	2.16765	8.68396e-10	7.69215e-08	0.782188	0.753882	0.793855	0.776642	0.64211	0.598318	0.610501	0.616976	0.159665	1.1127	2.64761e-05	0.00036364	WTvsKO_0h	No
cg29510396_TC21	chr11	50252866	50252868	CG	Enhancer	FALSE	+	Gm26542	Gm26542;Gm26542	antisense;antisense	ENSMUST00000180443.2;ENSMUST00000222498.1	15855;15914			0.324124	0.481718	0.404581	0.403474	0.255684	0.228014	0.276391	0.253363	0.150111	0.988753	0.000418901	0.000886902	0.741842	0.726391	0.762291	0.743508	0.458524	0.430894	0.307024	0.398814	0.344694	2.14278	5.41751e-06	0.000188824	WTvsKO_96h	No
cg29518828_TC21	chr11	50985513	50985515	CG	TSS;chr11:50984657;Olfr1377;ENSMUST00000075177;+856;2	FALSE	-	Olfr1377	Olfr1377;Olfr1377;Olfr1377	protein_coding;protein_coding;protein_coding	ENSMUST00000075177.4;ENSMUST00000213291.2;ENSMUST00000216101.2	856;3440;3547			0.510398	0.595538	0.490443	0.532126	0.197034	0.146426	0.212414	0.185291	0.346835	2.34128	9.66377e-10	8.17978e-08	0.750601	0.735936	0.752112	0.746216	0.56894	0.533865	0.533937	0.545581	0.200636	1.29243	2.96992e-06	0.000159185	WTvsKO_0h	No
cg29520738_TC11	chr11	51219670	51219672	CG	lincRNATSS;chr11:51219526;Platr20;ENSMUST00000137964;145	FALSE	+	Gm12569;Platr20	Gm12569;Platr20;Platr20	protein_coding;lincRNA;lincRNA	ENSMUST00000126189.2;ENSMUST00000137964.1;ENSMUST00000143209.7	-802;-144;748			0.132787	0.230139	0.208785	0.190571	0.113814	0.102638	0.103006	0.106486	0.0840845	0.946671	0.000677958	0.00132618	0.538905	0.526505	0.601202	0.555537	0.202567	0.160583	0.164824	0.175991	0.379546	2.55815	9.04373e-08	8.08438e-05	WTvsKO_96h	No
cg29520741_TC11	chr11	51219879	51219881	CG	lincRNATSS;chr11:51219526;Platr20;ENSMUST00000137964;354	FALSE	+	Gm12569;Platr20	Gm12569;Platr20;Platr20	protein_coding;lincRNA;lincRNA	ENSMUST00000126189.2;ENSMUST00000137964.1;ENSMUST00000143209.7	-593;-353;539			0.070581	0.141139	0.147698	0.119806	0.0256976	0.0247598	0.0191945	0.0232173	0.0965888	2.45552	4.27389e-09	1.97248e-07	0.483879	0.424698	0.511811	0.473463	0.107294	0.0549883	0.0690944	0.0771257	0.396337	3.48299	1.96343e-07	0.000107236	WTvsKO_96h	No
cg29521091_TC11	chr11	51255947	51255949	CG	TSS;chr11:51256263;BC049762;ENSMUST00000231433;+316;1	FALSE	-	BC049762	BC049762;BC049762;BC049762	protein_coding;protein_coding;protein_coding	ENSMUST00000054226.2;ENSMUST00000065950.9;ENSMUST00000231433.1	7099;7004;317			0.662111	0.78617	0.738057	0.72878	0.327802	0.260745	0.392805	0.327117	0.401662	2.50374	1.36964e-09	9.97125e-08	0.900336	0.886578	0.89819	0.895035	0.817595	0.792334	0.738578	0.782836	0.112199	1.22952	6.76583e-05	0.000598448	WTvsKO_0h	No
cg29525292_TC21	chr11	51621623	51621625	CG	Enhancer	FALSE	+	Nhp2	Nhp2;Nhp2	protein_coding;protein_coding	ENSMUST00000001083.3;ENSMUST00000127405.1	1853;1889		Shore	0.197284	0.295472	0.296919	0.263225	0.0557326	0.0567554	0.0662486	0.0595789	0.203646	2.47754	3.25357e-10	4.42579e-08	0.671696	0.681957	0.72545	0.693034	0.359443	0.352475	0.31677	0.342896	0.350139	2.11832	1.56589e-07	0.000100145	WTvsKO_96h	No
cg29549955_BC21	chr11	53794820	53794822	CG	Enhancer	FALSE	+	Gm12216	Gm12216;Gm12216;Gm12216;Gm12216	protein_coding;protein_coding;protein_coding;protein_coding	ENSMUST00000117316.7;ENSMUST00000135815.7;ENSMUST00000153206.7;ENSMUST00000220191.1	64436;64324;1055;55228			0.159529	0.278616	0.259087	0.232411	0.127251	0.0958025	0.07437	0.0991411	0.13327	1.4561	1.56589e-05	6.35293e-05	0.61656	0.571427	0.665672	0.617886	0.322543	0.308438	0.211677	0.280886	0.337	2.07542	8.85784e-06	0.000224405	WTvsKO_96h	No
cg29589461_TC21	chr11	58274858	58274860	CG	TSS;chr11:58274798;4930438A08Rik;ENSMUST00000108834;+60;1,TSS;chr11:58275059;4930438A08Rik;ENSMUST00000208022;-201;2	FALSE	-	4930438A08Rik	4930438A08Rik;4930438A08Rik	protein_coding;protein_coding	ENSMUST00000108834.2;ENSMUST00000208022.1	60;-201			0.484524	0.579936	0.518472	0.527644	0.176921	0.130502	0.216382	0.174601	0.353042	2.43107	7.78547e-10	7.24514e-08	0.751166	0.745479	0.769441	0.755362	0.570353	0.520523	0.555455	0.548777	0.206585	1.34482	3.37905e-06	0.000164827	WTvsKO_0h	No
cg29594377_TC21	chr11	58816873	58816875	CG	TSS;chr11:58816927;Olfr313;ENSMUST00000082220;-54;2	FALSE	-	Olfr313	Olfr313;Olfr313	protein_coding;protein_coding	ENSMUST00000082220.4;ENSMUST00000217506.1	-54;1874			0.538452	0.616186	0.534372	0.563003	0.199628	0.13561	0.266415	0.200551	0.362452	2.41361	3.7887e-09	1.82933e-07	0.787028	0.776149	0.783632	0.782269	0.608108	0.508757	0.558813	0.558559	0.22371	1.50361	5.97665e-06	0.0001945	WTvsKO_0h	No
cg29596374_TC11	chr11	58962213	58962215	CG	CGI;chr11:58961795-58962215	FALSE	-	H3f4;Trim17	H3f4;Trim17	unprocessed_pseudogene;protein_coding	ENSMUST00000122447.1;ENSMUST00000047697.11	402;7529	CGI:chr11:58961795-58962215	Island	0.519502	0.728836	0.62744	0.625259	0.28646	0.206959	0.319096	0.270839	0.354421	2.21307	6.15397e-08	1.1194e-06	0.789346	0.830355	0.827707	0.815803	0.546978	0.449493	0.569489	0.521987	0.293816	2.02606	2.82423e-06	0.000156986	WTvsKO_0h	No
cg29623470_BC11	chr11	61231670	61231672	CG	CTCF	FALSE	-	Aldh3a2	Aldh3a2	protein_coding	ENSMUST00000066277.9	35515			0.564191	0.709692	0.687178	0.653687	0.35592	0.253148	0.272867	0.293978	0.359709	2.20933	1.10964e-08	3.60331e-07	0.819568	0.83995	0.848916	0.836145	0.653332	0.600057	0.437489	0.563626	0.272519	1.97618	6.04279e-05	0.000561823	WTvsKO_0h	No
cg29623847_BC21	chr11	61265055	61265057	CG	Enhancer	FALSE	-	Aldh3a2	Aldh3a2;Aldh3a2;Aldh3a2;Aldh3a2;Aldh3a2	protein_coding;protein_coding;protein_coding;protein_coding;protein_coding	ENSMUST00000066277.9;ENSMUST00000074127.13;ENSMUST00000108715.2;ENSMUST00000128991.1;ENSMUST00000147291.7	2130;2130;2130;2072;2409		Shore	0.444371	0.503185	0.523058	0.490205	0.232259	0.189638	0.196604	0.206167	0.284038	1.8934	1.15977e-08	3.70722e-07	0.666557	0.624954	0.692443	0.661318	0.338596	0.261991	0.188225	0.262937	0.398381	2.49184	4.47205e-06	0.00017775	WTvsKO_96h	No
cg29623848_BC11	chr11	61265085	61265087	CG	Enhancer	FALSE	-	Aldh3a2	Aldh3a2;Aldh3a2;Aldh3a2;Aldh3a2;Aldh3a2	protein_coding;protein_coding;protein_coding;protein_coding;protein_coding	ENSMUST00000066277.9;ENSMUST00000074127.13;ENSMUST00000108715.2;ENSMUST00000128991.1;ENSMUST00000147291.7	2100;2100;2100;2042;2379		Shore	0.293413	0.411685	0.413409	0.372836	0.111504	0.0834699	0.0826202	0.0925313	0.280305	2.54544	3.00583e-10	4.24651e-08	0.450891	0.46605	0.51796	0.4783	0.187894	0.136106	0.0961056	0.140035	0.338265	2.54483	3.14683e-06	0.000161885	WTvsKO_96h	No
cg29636211_BC21	chr11	62499297	62499299	CG	Enhancer	FALSE	-	Gm12278;Pigl	Gm12278;Pigl;Pigl	antisense;protein_coding;protein_coding	ENSMUST00000153718.1;ENSMUST00000014389.5;ENSMUST00000147918.1	16501;40838;40690			0.10604	0.142154	0.171729	0.139974	0.0577296	0.0386057	0.0563278	0.0508877	0.0890866	1.59818	1.04284e-06	8.30593e-06	0.56538	0.460386	0.579874	0.535213	0.219526	0.213191	0.175082	0.2026	0.332614	2.18845	1.66926e-06	0.000141264	WTvsKO_96h	No
cg29644491_BC11	chr11	63264977	63264979	CG	Random	FALSE	+								0.594975	0.757429	0.681066	0.677823	0.372373	0.275273	0.202919	0.283522	0.394302	2.47187	1.22859e-08	3.84487e-07	0.909339	0.903515	0.915448	0.909434	0.879032	0.822972	0.738919	0.813641	0.0957929	1.13698	0.00317383	0.00728525	WTvsKO_0h	No
cg29674666_TC11	chr11	67016621	67016623	CG	Enhancer	FALSE	-								0.189664	0.462017	0.350746	0.334142	0.106241	0.104671	0.0759659	0.0956257	0.238517	2.1902	5.34709e-07	5.11728e-06	0.748572	0.746584	0.771513	0.755556	0.511761	0.476331	0.287108	0.425067	0.33049	2.08976	7.52802e-05	0.000636295	WTvsKO_96h	No
cg29696056_TC12	chr11	68904366	68904368	CG	GeneBody;Rpl26;NM_009080;inside_[cds_in_exon_4];splice=1	FALSE	+							Shelf	0.303558	0.488522	0.511758	0.434612	0.0763691	0.0556346	0.13297	0.0883247	0.346288	3.06337	1.56822e-09	1.07888e-07	0.857806	0.854557	0.886326	0.86623	0.573819	0.571958	0.588829	0.578202	0.288028	2.24835	7.62648e-08	7.68833e-05	WTvsKO_0h	No
cg29708573_BC21	chr11	69668729	69668731	CG	GeneBody;Eif4a1;NM_144958;inside_[cds_in_exon_6];splice=0	FALSE	-	Eif4a1;Gm24029	Eif4a1;Eif4a1;Eif4a1;Eif4a1;Eif4a1;Eif4a1;Eif4a1;Gm24029	protein_coding;protein_coding;protein_coding;protein_coding;protein_coding;protein_coding;protein_coding;snoRNA	ENSMUST00000102589.11;ENSMUST00000123995.7;ENSMUST00000128519.7;ENSMUST00000133067.1;ENSMUST00000140186.1;ENSMUST00000142348.1;ENSMUST00000163666.2;ENSMUST00000083928.1	3694;3588;3588;-440;-666;-492;3588;-753		Shelf	0.455433	0.513845	0.5154	0.494892	0.137975	0.154237	0.192014	0.161408	0.333484	2.36083	2.80221e-10	4.06888e-08	0.847691	0.832767	0.878313	0.852924	0.551574	0.564526	0.629691	0.58193	0.270993	2.06837	1.12249e-06	0.000133662	WTvsKO_0h	No
cg29708790_TC11	chr11	69678757	69678759	CG	TSS;chr11:69678686;Senp3;ENSMUST00000134942;-71;2	FALSE	-	Senp3	Senp3;Senp3;Senp3;Senp3;Senp3;Senp3	protein_coding;protein_coding;protein_coding;protein_coding;protein_coding;protein_coding	ENSMUST00000005336.8;ENSMUST00000066760.7;ENSMUST00000128355.1;ENSMUST00000130440.1;ENSMUST00000134942.1;ENSMUST00000153516.7	3089;3327;438;-744;-70;-638		Shelf	0.611995	0.677816	0.708481	0.666097	0.254389	0.20385	0.364321	0.274186	0.391911	2.44387	3.1574e-09	1.63743e-07	0.900824	0.90526	0.933961	0.913348	0.694945	0.744254	0.788394	0.742531	0.170817	1.87833	1.28174e-05	0.00026056	WTvsKO_0h	No
cg29709324_TC11	chr11	69714703	69714705	CG	Enhancer	FALSE	-								0.136857	0.30939	0.289236	0.245161	0.0732372	0.0408437	0.0461132	0.053398	0.191763	2.49107	4.28839e-08	8.75505e-07	0.764723	0.690319	0.802848	0.75263	0.423518	0.454385	0.317071	0.398325	0.354305	2.23288	1.27371e-05	0.000259774	WTvsKO_96h	No
cg29721243_BC11	chr11	70495021	70495023	CG	MonoallelicMeth	FALSE	+								0.577529	0.676102	0.628796	0.627475	0.234486	0.200522	0.28116	0.238723	0.388753	2.44321	3.24684e-10	4.42198e-08	0.751339	0.79489	0.780436	0.775555	0.625167	0.586682	0.566051	0.592633	0.182922	1.25085	1.63888e-05	0.000289856	WTvsKO_0h	No
cg29734496_TC11	chr11	71956560	71956562	CG	MonoallelicMeth	FALSE	-								0.603736	0.703923	0.615539	0.641066	0.328273	0.238149	0.267594	0.278005	0.363061	2.23304	2.44802e-09	1.39928e-07	0.828492	0.795954	0.840126	0.821524	0.74011	0.688211	0.624561	0.684294	0.13723	1.08109	0.000508522	0.00207129	WTvsKO_0h	No
cg29749037_BC21	chr11	73392224	73392226	CG	PseudogeneTSS;chr11:73392214;Olfr377-ps1;ENSMUST00000134011;11	FALSE	-	Olfr377-ps1	Olfr377-ps1	polymorphic_pseudogene	ENSMUST00000134011.3	-10			0.468042	0.585003	0.493957	0.515667	0.177138	0.183606	0.18921	0.183318	0.332349	2.24785	7.67786e-10	7.18597e-08	0.670058	0.735716	0.685126	0.696967	0.457385	0.412449	0.456919	0.442251	0.254716	1.54233	4.09007e-06	0.000173866	WTvsKO_0h	No
cg29749179_BC11	chr11	73428759	73428761	CG	TSS;chr11:73428476;Olfr378;ENSMUST00000069790;-283;1	FALSE	-	Olfr378	Olfr378	protein_coding	ENSMUST00000069790.4	-282			0.733966	0.783539	0.792904	0.770137	0.379188	0.363998	0.514332	0.419173	0.350964	2.23016	4.85179e-09	2.12896e-07	0.905842	0.912471	0.88942	0.902578	0.855156	0.788364	0.780054	0.807858	0.0947194	1.12348	0.000393806	0.00175335	WTvsKO_0h	No
cg29749180_TC11	chr11	73428776	73428778	CG	TSS;chr11:73428476;Olfr378;ENSMUST00000069790;-300;2	FALSE	+	Olfr378	Olfr378	protein_coding	ENSMUST00000069790.4	-299			0.739371	0.839261	0.73583	0.771487	0.383498	0.405336	0.505618	0.431484	0.340003	2.19067	1.66506e-08	4.6854e-07	0.886853	0.800095	0.823432	0.836794	0.773935	0.754208	0.784315	0.770819	0.0659743	0.645761	0.0206327	0.0312443	WTvsKO_0h	No
cg29749922_BC11	chr11	73592621	73592623	CG	TSS;chr11:73593007;Olfr385;ENSMUST00000215689;+386;1	FALSE	-	Olfr385	Olfr385	protein_coding	ENSMUST00000215689.1	387			0.671826	0.795815	0.741349	0.73633	0.347405	0.253156	0.372381	0.324314	0.412016	2.57959	7.87244e-10	7.27482e-08	0.844836	0.883542	0.879122	0.869166	0.75895	0.705322	0.731859	0.732044	0.137123	1.28949	3.21189e-05	0.000399926	WTvsKO_0h	No
cg29749948_BC11	chr11	73602383	73602385	CG	TSS;chr11:73602581;Olfr384;ENSMUST00000072993;-198;1	FALSE	-	Olfr384	Olfr384;Olfr384	protein_coding;protein_coding	ENSMUST00000072993.1;ENSMUST00000214228.1	-198;3790			0.54577	0.694992	0.638724	0.626496	0.334722	0.228845	0.310186	0.291251	0.335244	2.05728	3.74469e-08	8.01577e-07	0.782209	0.786203	0.806882	0.791765	0.717383	0.616295	0.620197	0.651292	0.140473	1.01705	0.000433375	0.00186584	WTvsKO_0h	No
cg29750399_BC11	chr11	73688569	73688571	CG	Random,TSS;chr11:73688777;Zfp735;ENSMUST00000080407;-208;2	FALSE	+	Zfp735	Zfp735;Zfp735	protein_coding;protein_coding	ENSMUST00000080407.5;ENSMUST00000149560.1	-208;-229			0.714734	0.783001	0.755798	0.751178	0.318313	0.256517	0.38314	0.319324	0.431854	2.70911	7.79058e-11	2.03838e-08	0.868785	0.886428	0.878134	0.877782	0.70369	0.687318	0.712345	0.701118	0.176664	1.61608	4.85917e-07	0.000122995	WTvsKO_0h	No
cg29750563_BC21	chr11	73727427	73727429	CG	PseudogeneTSS;chr11:73727511;Olfr388-ps1;ENSMUST00000118336;82	FALSE	+	Olfr388-ps1	Olfr388-ps1	polymorphic_pseudogene	ENSMUST00000118336.3	84			0.588492	0.664963	0.559691	0.604382	0.265986	0.225345	0.306292	0.265874	0.338508	2.09215	5.96422e-09	2.42939e-07	0.784654	0.800903	0.779568	0.788375	0.639413	0.604632	0.612521	0.618855	0.16952	1.19866	6.36805e-06	0.000198362	WTvsKO_0h	No
cg29750747_BC21	chr11	73773365	73773367	CG	PseudogeneTSS;chr11:73772120;Gm12328;ENSMUST00000118611;1246	FALSE	-	Gm12328	Gm12328	processed_pseudogene	ENSMUST00000118611.1	-1245			0.668936	0.71236	0.669726	0.683674	0.326162	0.292795	0.367314	0.328757	0.354917	2.14885	1.08334e-09	8.75586e-08	0.825148	0.826197	0.828088	0.826478	0.697448	0.711074	0.754209	0.72091	0.105567	0.877977	0.000164814	0.0010088	WTvsKO_0h	No
cg29750769_BC11	chr11	73783048	73783050	CG	TSS;chr11:73782963;Olfr390;ENSMUST00000120081;+85;1,TSS;chr11:73782965;Olfr390;ENSMUST00000215161;+83;1,TSS;chr11:73782983;Olfr390;ENSMUST00000206815;+65;1	FALSE	+	Olfr390	Olfr390;Olfr390;Olfr390	protein_coding;protein_coding;protein_coding	ENSMUST00000120081.2;ENSMUST00000206815.1;ENSMUST00000215161.1	85;65;83			0.520613	0.589377	0.557267	0.555752	0.140589	0.120587	0.160418	0.140531	0.415221	2.94617	2.67618e-12	2.01461e-09	0.695987	0.749297	0.742371	0.729218	0.479612	0.388671	0.421907	0.430064	0.299155	1.84227	2.00663e-06	0.00014491	WTvsKO_0h	No
cg29751029_BC21	chr11	73847667	73847669	CG	TSS;chr11:73848122;Olfr393;ENSMUST00000102523;+455;1	TRUE	+	Olfr393	Olfr393;Olfr393	protein_coding;protein_coding	ENSMUST00000102523.1;ENSMUST00000213365.1	456;3787			0.520838	0.672764	0.557642	0.583748	0.216715	0.15939	0.243997	0.2067	0.377048	2.45946	1.71983e-09	1.13994e-07	0.754268	0.79039	0.769947	0.771535	0.622702	0.56894	0.596551	0.596064	0.175471	1.19605	1.48337e-05	0.000277171	WTvsKO_0h	No
cg29751247_BC21	chr11	73889330	73889332	CG	TSS;chr11:73888369;Olfr394;ENSMUST00000071478;-961;1	FALSE	+	Olfr394	Olfr394;Olfr394;Olfr394	protein_coding;protein_coding;protein_coding	ENSMUST00000071478.1;ENSMUST00000214284.1;ENSMUST00000216608.1	-960;1441;1441			0.633668	0.711779	0.639428	0.661625	0.302663	0.256528	0.37604	0.311744	0.349881	2.1304	6.59385e-09	2.59795e-07	0.852607	0.848409	0.830102	0.843706	0.723702	0.670328	0.690037	0.694689	0.149017	1.24594	1.14364e-05	0.000248352	WTvsKO_0h	No
cg29751279_TC11	chr11	73903106	73903108	CG	Random	FALSE	-								0.68193	0.752012	0.728615	0.720853	0.303663	0.320723	0.400379	0.341588	0.379264	2.32942	6.11071e-10	6.29605e-08	0.821269	0.813706	0.838272	0.824416	0.768853	0.740839	0.659759	0.72315	0.101265	0.832084	0.00226176	0.00571816	WTvsKO_0h	No
cg29751291_BC11	chr11	73907522	73907524	CG	TSS;chr11:73907489;Olfr395;ENSMUST00000072991;-33;1	FALSE	-	Olfr395	Olfr395;Olfr395	protein_coding;protein_coding	ENSMUST00000072991.1;ENSMUST00000215690.1	-32;1777			0.779914	0.844021	0.783243	0.802393	0.460461	0.419424	0.519332	0.466406	0.335987	2.23356	1.86909e-09	1.19055e-07	0.88986	0.89047	0.90701	0.89578	0.855007	0.848509	0.800866	0.834794	0.0609858	0.756655	0.00178353	0.00483773	WTvsKO_0h	No
cg29751370_TC11	chr11	73930669	73930671	CG	Random	FALSE	-								0.636406	0.765667	0.688605	0.696893	0.319113	0.281432	0.374256	0.324934	0.371959	2.28265	3.1647e-09	1.63894e-07	0.866553	0.869954	0.87792	0.871476	0.783989	0.7621	0.734148	0.760079	0.111397	1.09413	2.77157e-05	0.000372623	WTvsKO_0h	No
cg29751387_BC11	chr11	73937956	73937958	CG	TSS;chr11:73936676;Olfr23;ENSMUST00000214210;+1280;1	FALSE	+	Olfr23	Olfr23	protein_coding	ENSMUST00000214210.1	1280			0.727298	0.803741	0.775202	0.768747	0.401303	0.362285	0.396396	0.386661	0.382086	2.41157	1.67275e-10	3.04633e-08	0.876837	0.888754	0.881722	0.882437	0.785416	0.722058	0.752095	0.75319	0.129248	1.29251	1.33847e-05	0.000265055	WTvsKO_0h	No
cg29751394_TC11	chr11	73939751	73939753	CG	TSS;chr11:73940247;Olfr23;ENSMUST00000092917;-496;2	FALSE	-	Olfr23	Olfr23;Olfr23	protein_coding;protein_coding	ENSMUST00000092917.3;ENSMUST00000214210.1	-496;3075			0.74325	0.866792	0.798718	0.80292	0.487023	0.368832	0.501193	0.452349	0.350571	2.35568	1.13762e-08	3.65983e-07	0.922654	0.917481	0.911246	0.917127	0.871329	0.832993	0.817021	0.840448	0.0766796	1.05821	0.000154906	0.00097241	WTvsKO_0h	No
cg29751506_TC21	chr11	73961125	73961127	CG	TSS;chr11:73960816;Olfr397;ENSMUST00000213134-ENSMUST00000216291;+309;1	FALSE	-	Olfr397	Olfr397;Olfr397;Olfr397	protein_coding;protein_coding;protein_coding	ENSMUST00000213134.1;ENSMUST00000215020.1;ENSMUST00000216291.1	309;236;309			0.53878	0.548906	0.524326	0.537337	0.0922536	0.0870607	0.132046	0.103787	0.433551	3.35116	3.20841e-13	3.69205e-10	0.696315	0.756448	0.65122	0.701328	0.394277	0.374418	0.422062	0.396919	0.304409	1.84882	4.07106e-06	0.000173642	WTvsKO_0h	No
cg29751520_BC21	chr11	73964592	73964594	CG	TSS;chr11:73964529;Olfr397;ENSMUST00000121280;+63;2	FALSE	-	Olfr397	Olfr397;Olfr397;Olfr397;Olfr397	protein_coding;protein_coding;protein_coding;protein_coding	ENSMUST00000121280.2;ENSMUST00000213134.1;ENSMUST00000215020.1;ENSMUST00000216291.1	63;3776;3703;3776			0.625243	0.669438	0.601443	0.632041	0.270199	0.236887	0.36063	0.289239	0.342803	2.09915	8.31691e-09	2.99784e-07	0.767723	0.80593	0.786986	0.78688	0.67604	0.676056	0.711325	0.687807	0.0990726	0.746817	0.000528426	0.00212408	WTvsKO_0h	No
cg29752009_TC21	chr11	74069537	74069539	CG	TSS;chr11:74069954;Zfp616;ENSMUST00000074813-ENSMUST00000108463;-417;1,TSS;chr11:74070184;Zfp616;ENSMUST00000116546;-647;1	FALSE	+	Zfp616	Zfp616;Zfp616;Zfp616;Zfp616	protein_coding;protein_coding;protein_coding;protein_coding	ENSMUST00000074813.11;ENSMUST00000108463.7;ENSMUST00000116546.2;ENSMUST00000137407.1	-417;-417;-647;-627			0.630417	0.698548	0.617397	0.648787	0.237559	0.209809	0.301862	0.249743	0.399044	2.49276	2.49817e-10	3.84316e-08	0.811603	0.801461	0.814693	0.809252	0.67116	0.647026	0.658567	0.658918	0.150335	1.1351	6.46409e-06	0.000199454	WTvsKO_0h	No
cg29752918_TC21	chr11	74268360	74268362	CG	TSS;chr11:74269343;Olfr406;ENSMUST00000133561;-983;2	FALSE	+	Olfr406	Olfr406;Olfr406;Olfr406	protein_coding;protein_coding;protein_coding	ENSMUST00000133561.5;ENSMUST00000214303.1;ENSMUST00000217016.1	-983;8468;8553			0.722154	0.690165	0.652748	0.688355	0.311795	0.274047	0.297793	0.294545	0.39381	2.40976	1.03117e-10	2.40716e-08	0.837392	0.818234	0.812382	0.822669	0.683458	0.620996	0.611693	0.638716	0.183954	1.39029	9.41007e-06	0.000229558	WTvsKO_0h	No
cg29753003_BC11	chr11	74283238	74283240	CG	TSS;chr11:74283735;Olfr59;ENSMUST00000143976-ENSMUST00000214048;-497;1,TSS;chr11:74283793;Olfr59;ENSMUST00000205790;-555;1,TSS;chr11:74283832;Olfr59;ENSMUST00000206659;-594;1	FALSE	+	Olfr59	Olfr59;Olfr59;Olfr59;Olfr59	protein_coding;protein_coding;protein_coding;protein_coding	ENSMUST00000143976.3;ENSMUST00000205790.1;ENSMUST00000206659.1;ENSMUST00000214048.2	-497;-555;-594;-497			0.595954	0.594221	0.591892	0.594022	0.267214	0.207079	0.275409	0.249901	0.344121	2.14512	1.12435e-09	8.90273e-08	0.796494	0.793753	0.750926	0.780391	0.686183	0.657385	0.660527	0.668032	0.112359	0.825287	0.000319946	0.00153373	WTvsKO_0h	No
cg29757342_TC21	chr11	74725222	74725224	CG	Enhancer	FALSE	+	Pafah1b1	Pafah1b1;Pafah1b1;Pafah1b1;Pafah1b1	protein_coding;protein_coding;protein_coding;protein_coding	ENSMUST00000021091.14;ENSMUST00000102520.8;ENSMUST00000126341.7;ENSMUST00000156794.1	-552;-1364;-887;-904		Shore	0.470938	0.549895	0.508846	0.509893	0.196906	0.154398	0.176789	0.176031	0.333862	2.29089	3.66656e-10	4.74146e-08	0.718225	0.739249	0.73853	0.732001	0.563071	0.501977	0.453725	0.506258	0.225743	1.41392	1.56528e-05	0.00028419	WTvsKO_0h	No
cg29765195_TC21	chr11	75383781	75383783	CG	Enhancer	FALSE	-	Smyd4	Smyd4	protein_coding	ENSMUST00000044530.2	35349			0.43853	0.456317	0.436855	0.443901	0.282252	0.24508	0.154638	0.227323	0.216578	1.48154	4.65909e-06	2.51996e-05	0.722061	0.635299	0.714867	0.690743	0.399291	0.378776	0.23114	0.336402	0.35434	2.18036	3.45558e-05	0.00041561	WTvsKO_96h	No
cg29778012_BC21	chr11	76401256	76401258	CG	Enhancer	FALSE	+							Shore	0.557384	0.612927	0.586975	0.585762	0.242391	0.207941	0.205287	0.218539	0.367222	2.34305	1.45698e-10	2.87482e-08	0.736235	0.760258	0.772895	0.756463	0.620305	0.604194	0.501909	0.575469	0.180993	1.19448	0.000151795	0.00096042	WTvsKO_0h	No
cg29787513_TC11	chr11	77355429	77355431	CG	Enhancer	FALSE	+	Ssh2	Ssh2;Ssh2;Ssh2;Ssh2;Ssh2	protein_coding;protein_coding;protein_coding;protein_coding;protein_coding	ENSMUST00000037912.11;ENSMUST00000127890.8;ENSMUST00000156488.7;ENSMUST00000180554.1;ENSMUST00000181283.2	139143;7150;139143;7142;7148			0.506362	0.726214	0.638702	0.623759	0.298204	0.225939	0.279046	0.26773	0.356029	2.21556	3.80397e-08	8.09709e-07	0.838722	0.89591	0.884282	0.872971	0.813477	0.76736	0.731616	0.770818	0.102153	1.04157	0.00124877	0.00377619	WTvsKO_0h	No
cg29793696_TC11	chr11	77892104	77892106	CG	Enhancer	FALSE	-	Pipox	Pipox	protein_coding	ENSMUST00000017597.4	1992			0.312279	0.546591	0.519107	0.459326	0.184398	0.165193	0.134682	0.161424	0.297901	2.13566	1.47549e-07	2.03263e-06	0.798934	0.799479	0.864483	0.820965	0.539304	0.492776	0.42816	0.486747	0.334218	2.29698	2.70636e-06	0.000155553	WTvsKO_96h	No
cg29802310_BC11	chr11	78514269	78514271	CG	Enhancer	FALSE	+	Poldip2	Poldip2;Poldip2	protein_coding;protein_coding	ENSMUST00000001127.10;ENSMUST00000133601.1	2077;1854		Shore	0.676193	0.77986	0.800332	0.752128	0.370166	0.280153	0.440263	0.363527	0.388601	2.45492	4.66185e-09	2.07703e-07	0.89943	0.903376	0.914396	0.905734	0.783272	0.794387	0.814966	0.797542	0.108192	1.28675	6.12769e-06	0.000196619	WTvsKO_0h	No
cg29808508_TC21	chr11	79096221	79096223	CG	Enhancer	FALSE	-	Ksr1	Ksr1;Ksr1	protein_coding;protein_coding	ENSMUST00000018478.10;ENSMUST00000108264.7	50186;50186			0.225278	0.325493	0.321841	0.290871	0.0967142	0.0805971	0.108787	0.0953663	0.195504	1.95369	2.6028e-08	6.28375e-07	0.678294	0.63827	0.744424	0.686996	0.337961	0.337563	0.265976	0.313833	0.373163	2.28167	1.63425e-06	0.000141065	WTvsKO_96h	No
cg29808599_TC21	chr11	79103225	79103227	CG	GeneBody;Ksr1;NM_013571;inside_[intron_between_exon_1_and_2];splice=0	FALSE	-	Ksr1	Ksr1;Ksr1	protein_coding;protein_coding	ENSMUST00000018478.10;ENSMUST00000108264.7	43182;43182			0.181088	0.231866	0.230515	0.214489	0.192953	0.161713	0.189253	0.181306	0.0331829	0.29774	0.18452	0.210736	0.666139	0.580484	0.71347	0.653364	0.293679	0.301312	0.199334	0.264775	0.388589	2.42225	5.92364e-06	0.000193996	WTvsKO_96h	No
cg29814706_TC11	chr11	79689755	79689757	CG	EPIC;cg04740002	FALSE	-	Rab11fip4	Rab11fip4	protein_coding	ENSMUST00000017783.12	98544			0.712072	0.802419	0.740906	0.751799	0.47325	0.37521	0.410051	0.419504	0.332295	2.08634	7.62987e-09	2.8448e-07	0.945671	0.955906	0.968427	0.956668	0.905242	0.841879	0.808763	0.851962	0.104706	1.91656	0.000123171	0.00084555	WTvsKO_0h	No
cg29819806_BC21	chr11	80139321	80139323	CG	GeneBody;Tefm;NM_183275;inside_[intron_between_exon_2_and_3];splice=0	FALSE	+	Tefm	Tefm;Tefm;Tefm	protein_coding;protein_coding;protein_coding	ENSMUST00000050207.9;ENSMUST00000131601.1;ENSMUST00000136996.1	2854;2822;588			0.170443	0.27434	0.309893	0.251559	0.123036	0.10944	0.134347	0.122275	0.129284	1.2348	6.70211e-05	0.000199244	0.700658	0.641464	0.743271	0.695131	0.337997	0.34727	0.368481	0.351249	0.343882	2.08577	9.05732e-07	0.00013069	WTvsKO_96h	No
cg29819827_BC11	chr11	80140229	80140231	CG	Random	FALSE	-	Tefm	Tefm;Tefm;Tefm	protein_coding;protein_coding;protein_coding	ENSMUST00000050207.9;ENSMUST00000131601.1;ENSMUST00000136996.1	1946;1914;-320			0.0826006	0.21626	0.22617	0.17501	0.0590747	0.0515047	0.0461374	0.0522389	0.122771	1.82019	6.85248e-06	3.37927e-05	0.55923	0.553407	0.61051	0.574383	0.226238	0.2511	0.193692	0.223677	0.350706	2.23645	2.24091e-07	0.000108644	WTvsKO_96h	No
cg29844198_BC21	chr11	82766988	82766990	CG	GeneBody;Zfp830;NM_025884;inside_[3-UTR;noncoding_exon_1];splice=0	FALSE	-							Shelf	0.576301	0.66289	0.62659	0.621927	0.314355	0.263374	0.272244	0.283324	0.338603	2.06451	2.83182e-09	1.53074e-07	0.837995	0.847322	0.878436	0.854584	0.746799	0.71068	0.733798	0.730426	0.124158	1.12557	5.68515e-05	0.000542057	WTvsKO_0h	No
cg29849842_BC21	chr11	83308219	83308221	CG	TSS;chr11:83308237;Ap2b1;ENSMUST00000176523;-18;1	FALSE	+	Ap2b1	Ap2b1;Ap2b1;Ap2b1;Ap2b1;Ap2b1;Ap2b1;Ap2b1	protein_coding;protein_coding;protein_coding;protein_coding;protein_coding;protein_coding;protein_coding	ENSMUST00000018875.12;ENSMUST00000065692.13;ENSMUST00000132178.2;ENSMUST00000142680.1;ENSMUST00000176430.7;ENSMUST00000176523.1;ENSMUST00000176944.7	5737;5446;5517;5268;5486;-18;9196			0.605153	0.666695	0.628444	0.633431	0.327531	0.27066	0.299066	0.299086	0.334345	2.02372	2.84434e-09	1.5339e-07	0.802535	0.812925	0.848811	0.821424	0.735044	0.713309	0.645129	0.697827	0.123597	0.994056	0.000560007	0.00220536	WTvsKO_0h	No
cg29852626_BC11	chr11	83573095	83573097	CG	Enhancer,GeneBody;Ccl9;NM_011338;inside_[3-UTR;noncoding_exon_4];splice=0	FALSE	+	Ccl9	Ccl9	protein_coding	ENSMUST00000019266.5	5541			0.484566	0.666977	0.632787	0.594777	0.506246	0.40177	0.286235	0.398084	0.196693	1.18485	0.000609547	0.00121255	0.802246	0.77005	0.821697	0.797998	0.565526	0.555979	0.232357	0.451287	0.34671	2.3292	0.00084	0.00288706	WTvsKO_96h	No
cg29853742_TC21	chr11	83750132	83750134	CG	Enhancer,GeneBody;Wfdc21;NM_183249;inside_[3-UTR;intron_between_exon_2_and_3];splice=0	FALSE	-	Wfdc21	Wfdc21	protein_coding	ENSMUST00000070832.2	3193		Shelf	0.573734	0.642329	0.599226	0.605097	0.257171	0.215919	0.329775	0.267622	0.337475	2.0892	7.4694e-09	2.80418e-07	0.729799	0.745971	0.73636	0.737377	0.62624	0.608859	0.616963	0.617354	0.120023	0.799571	9.52246e-05	0.000727476	WTvsKO_0h	No
cg29890784_BC11	chr11	87405114	87405116	CG	TSS;chr11:87405064;Tex14;ENSMUST00000060835;+50;1	FALSE	-	Rad51c;Tex14	Rad51c;Rad51c;Rad51c;Rad51c;Tex14	protein_coding;protein_coding;protein_coding;protein_coding;protein_coding	ENSMUST00000007790.10;ENSMUST00000067692.12;ENSMUST00000129400.1;ENSMUST00000153073.7;ENSMUST00000060835.11	-160;-591;-691;-608;50		Shore	0.189674	0.36358	0.335054	0.296103	0.0952339	0.0692427	0.0745265	0.0796677	0.216435	2.2465	3.03916e-08	6.97003e-07	0.636117	0.562926	0.666346	0.621796	0.31341	0.265665	0.248735	0.275937	0.345859	2.12058	1.37969e-06	0.00013771	WTvsKO_96h	No
cg29894909_TC21	chr11	87756287	87756289	CG	Enhancer	FALSE	-	Mir142;Mir142hg	Mir142;Mir142hg	miRNA;lincRNA	ENSMUST00000198092.1;ENSMUST00000123700.1	-576;711			0.537006	0.600785	0.561192	0.566328	0.43276	0.384581	0.221155	0.346166	0.220163	1.34783	7.2391e-05	0.00021188	0.740644	0.725115	0.760621	0.742127	0.510612	0.471245	0.232379	0.404745	0.337381	2.13663	0.000370238	0.00168526	WTvsKO_96h	No
cg29894910_TC21	chr11	87756298	87756300	CG	Enhancer	FALSE	+	Mir142;Mir142hg	Mir142;Mir142hg	miRNA;lincRNA	ENSMUST00000198092.1;ENSMUST00000123700.1	-565;722			0.530342	0.605043	0.558733	0.564706	0.401922	0.314047	0.167619	0.294529	0.270177	1.71459	9.53688e-06	4.34634e-05	0.749524	0.743744	0.805112	0.766127	0.516389	0.451259	0.190696	0.386115	0.380012	2.47935	0.000480923	0.00199747	WTvsKO_96h	No
cg29894946_TC21	chr11	87757334	87757336	CG	miRNA;chr11:87756864;Mir142;ENSMUST00000198092;471;3,miRNA;chr11:87756955;Mir142b;ENSMUST00000083486;380;3	FALSE	-	Mir142b	Mir142b	miRNA	ENSMUST00000083486.2	-379			0.429627	0.486686	0.455128	0.457147	0.266348	0.205206	0.106825	0.192793	0.264354	1.91122	1.01759e-06	8.16207e-06	0.701694	0.670025	0.730051	0.70059	0.44513	0.391448	0.202212	0.346263	0.354327	2.20861	0.000170948	0.00103168	WTvsKO_96h	No
cg29897704_TC11	chr11	87983972	87983974	CG	TSS;chr11:87984011;Dynll2;ENSMUST00000178105;+39;1	FALSE	+	Dynll2	Dynll2;Dynll2;Dynll2;Dynll2	protein_coding;protein_coding;protein_coding;protein_coding	ENSMUST00000020775.8;ENSMUST00000107923.9;ENSMUST00000146941.1;ENSMUST00000178105.2	3561;2613;3384;40		Shelf	0.663228	0.761645	0.707496	0.71079	0.341558	0.288266	0.384412	0.338079	0.372711	2.28606	1.44641e-09	1.02699e-07	0.902266	0.904617	0.891011	0.899298	0.793102	0.751837	0.759073	0.768004	0.131294	1.43001	3.13228e-06	0.000161774	WTvsKO_0h	No
cg29897725_TC11	chr11	87985579	87985581	CG	Enhancer	FALSE	-	Dynll2	Dynll2;Dynll2;Dynll2	protein_coding;protein_coding;protein_coding	ENSMUST00000020775.8;ENSMUST00000107923.9;ENSMUST00000146941.1	1954;1006;1777		Shore	0.567399	0.684204	0.646992	0.632865	0.257622	0.154077	0.309801	0.2405	0.392365	2.50675	5.4979e-09	2.31005e-07	0.702408	0.787731	0.820633	0.770258	0.601679	0.586545	0.556408	0.581544	0.188713	1.29937	0.000254537	0.00132432	WTvsKO_0h	No
cg29898639_BC11	chr11	88051138	88051140	CG	EPIC;cg16177812,GeneBody;Srsf1;NM_001078167;inside_[3-UTR;noncoding_exon_3];splice=0,GeneBody;Srsf1;NM_173374;inside_[3-UTR;noncoding_exon_4];splice=0	FALSE	+	Srsf1	Srsf1;Srsf1;Srsf1	protein_coding;protein_coding;protein_coding	ENSMUST00000079866.10;ENSMUST00000134824.8;ENSMUST00000139129.8	3421;2572;3766		Shelf	0.412627	0.510256	0.562926	0.495269	0.13456	0.121636	0.150058	0.135418	0.359851	2.65136	9.4291e-11	2.27429e-08	0.798865	0.786572	0.823151	0.802863	0.519075	0.472927	0.461506	0.484503	0.31836	2.1197	1.56161e-07	0.000100145	WTvsKO_0h	No
cg29903391_BC11	chr11	88394724	88394726	CG	Enhancer	FALSE	-	Msi2	Msi2;Msi2;Msi2	protein_coding;protein_coding;protein_coding	ENSMUST00000092794.11;ENSMUST00000107909.7;ENSMUST00000148013.7	323377;323505;195423			0.248135	0.48338	0.380389	0.370635	0.271894	0.214135	0.134207	0.206745	0.16389	1.19575	0.000989857	0.00182754	0.751098	0.629995	0.745776	0.708956	0.436147	0.402662	0.269444	0.369418	0.339539	2.09745	6.21497e-05	0.000570928	WTvsKO_96h	No
cg29908789_BC21	chr11	88803739	88803741	CG	Enhancer	FALSE	+								0.122553	0.196779	0.196881	0.172071	0.0522063	0.0404748	0.0633783	0.0520198	0.120051	1.9125	9.24227e-08	1.47553e-06	0.561961	0.549948	0.637004	0.582971	0.26857	0.288095	0.193704	0.250123	0.332848	2.08933	4.79443e-06	0.00018049	WTvsKO_96h	No
cg29910690_TC21	chr11	88931049	88931051	CG	Enhancer	FALSE	-	Scpep1;Scpep1os	Scpep1;Scpep1os	protein_coding;antisense	ENSMUST00000000287.8;ENSMUST00000139592.2	24416;25122			0.196901	0.307861	0.308718	0.27116	0.0832399	0.0725603	0.105435	0.0870784	0.184082	1.95405	6.51829e-08	1.16488e-06	0.692247	0.679343	0.74073	0.704107	0.367285	0.351803	0.363725	0.360938	0.343169	2.08008	1.55737e-07	0.000100145	WTvsKO_96h	No
cg29910725_TC21	chr11	88933384	88933386	CG	Enhancer	FALSE	+	Scpep1;Scpep1os	Scpep1;Scpep1os	protein_coding;antisense	ENSMUST00000000287.8;ENSMUST00000139592.2	22081;27457			0.14412	0.220289	0.232396	0.198935	0.0665823	0.0659776	0.0647787	0.0657795	0.133155	1.78899	9.98049e-08	1.55452e-06	0.604117	0.50264	0.59723	0.567996	0.251088	0.22937	0.194623	0.225027	0.342969	2.18909	1.13541e-06	0.000134083	WTvsKO_96h	No
cg29928159_BC11	chr11	90640106	90640108	CG	TSS;chr11:90640177;Cox11;ENSMUST00000099960;-71;2	FALSE	-	Cox11	Cox11;Cox11	protein_coding;protein_coding	ENSMUST00000020851.14;ENSMUST00000099960.2	1934;-71		Shore	0.536646	0.654708	0.629773	0.607042	0.266656	0.246687	0.280399	0.264581	0.342462	2.11037	3.19449e-09	1.64815e-07	0.845864	0.854387	0.838237	0.846163	0.787578	0.727581	0.716448	0.743869	0.102294	0.912477	0.000376901	0.0017051	WTvsKO_0h	No
cg29929611_TC11	chr11	90804739	90804741	CG	lincRNATSS;chr11:90804692;4930405D11Rik;ENSMUST00000142521;48	FALSE	-	4930405D11Rik	4930405D11Rik	lincRNA	ENSMUST00000142521.1	48			0.730876	0.818321	0.741385	0.763527	0.437951	0.356801	0.493692	0.429482	0.334046	2.12617	1.42545e-08	4.24376e-07	0.922662	0.929128	0.914688	0.922159	0.876981	0.84896	0.856599	0.860847	0.0613124	0.936197	0.000117707	0.000823089	WTvsKO_0h	No
cg29933372_BC21	chr11	91439643	91439645	CG	Adenoma	FALSE	-								0.580453	0.676615	0.597224	0.618097	0.243652	0.23369	0.293893	0.257078	0.361019	2.23796	1.1367e-09	8.93922e-08	0.792561	0.797291	0.828298	0.80605	0.624009	0.637015	0.619004	0.626676	0.179374	1.31244	4.88464e-06	0.000181865	WTvsKO_0h	No
cg29935192_TC11	chr11	91832346	91832348	CG	Random	FALSE	+	Gm11498	Gm11498	processed_pseudogene	ENSMUST00000120660.1	-956			0.763708	0.848145	0.774531	0.795461	0.459286	0.344222	0.45566	0.419722	0.375739	2.45879	1.1803e-09	9.14618e-08	0.923711	0.941882	0.948733	0.938109	0.890128	0.851504	0.875191	0.872275	0.0658339	1.15954	0.000182487	0.00107431	WTvsKO_0h	No
cg29935685_BC11	chr11	91940763	91940765	CG	Random	FALSE	-								0.533005	0.675985	0.610427	0.606472	0.195574	0.180418	0.245358	0.207116	0.399356	2.58143	2.52563e-10	3.85938e-08	0.832821	0.842462	0.852405	0.842562	0.648537	0.596291	0.624602	0.623143	0.219419	1.69479	5.49081e-07	0.000123618	WTvsKO_0h	No
cg29935813_TC11	chr11	91971712	91971714	CG	PMDsoloWCGW	FALSE	-								0.461109	0.628366	0.55945	0.549642	0.210718	0.17164	0.265335	0.215898	0.333744	2.1743	1.7899e-08	4.9079e-07	0.712854	0.749761	0.73748	0.733365	0.590627	0.556806	0.572529	0.573321	0.160045	1.03518	2.69405e-05	0.000367104	WTvsKO_0h	No
cg29935826_TC21	chr11	91977267	91977269	CG	PMDsoloWCGW	FALSE	+								0.478371	0.598843	0.488313	0.521843	0.147636	0.127411	0.1922	0.155749	0.366094	2.58743	2.54012e-10	3.86896e-08	0.737457	0.754079	0.744017	0.745184	0.619042	0.579529	0.601642	0.600071	0.145114	0.962566	3.37418e-05	0.000410605	WTvsKO_0h	No
cg29935828_BC11	chr11	91977791	91977793	CG	Random	FALSE	+								0.60864	0.731827	0.673822	0.67143	0.208349	0.161291	0.255473	0.208371	0.463059	2.99322	2.67123e-11	1.06325e-08	0.838762	0.857642	0.847872	0.848092	0.591099	0.577526	0.652446	0.607024	0.241068	1.8524	6.72923e-07	0.000127457	WTvsKO_0h	No
cg29935836_TC21	chr11	91980072	91980074	CG	PMDsoloWCGW	FALSE	-								0.472853	0.614489	0.525706	0.537683	0.143314	0.141652	0.256526	0.180497	0.357185	2.45942	5.8899e-09	2.41142e-07	0.776192	0.805323	0.789519	0.790344	0.566912	0.539791	0.587269	0.564657	0.225687	1.54084	1.19785e-06	0.000135434	WTvsKO_0h	No
cg29936229_TC21	chr11	92072886	92072888	CG	PMDsoloWCGW	FALSE	+								0.560852	0.594209	0.596311	0.583791	0.232195	0.209728	0.259627	0.23385	0.34994	2.20567	4.4485e-10	5.29891e-08	0.785203	0.74668	0.736838	0.75624	0.593223	0.594771	0.585008	0.591001	0.165239	1.10724	2.37207e-05	0.000344451	WTvsKO_0h	No
cg29936840_TC21	chr11	92206422	92206424	CG	PMDsoloWCGW	FALSE	+								0.467868	0.603193	0.542871	0.537977	0.168084	0.114873	0.1869	0.156619	0.381358	2.68026	2.35069e-10	3.68133e-08	0.81529	0.815578	0.826149	0.819006	0.650002	0.610764	0.630966	0.630577	0.188429	1.40618	1.44043e-06	0.00013778	WTvsKO_0h	No
cg29937413_BC21	chr11	92352984	92352986	CG	PMDsoloWCGW	FALSE	+								0.601433	0.6529	0.585741	0.613358	0.24774	0.245915	0.315306	0.269653	0.343704	2.11417	2.27271e-09	1.34103e-07	0.779261	0.817799	0.803376	0.800145	0.670198	0.633956	0.613912	0.639355	0.16079	1.17739	2.49048e-05	0.000353056	WTvsKO_0h	No
cg29937662_BC21	chr11	92405070	92405072	CG	PMDsoloWCGW	FALSE	-								0.534049	0.70385	0.568094	0.601998	0.243007	0.211046	0.285887	0.246647	0.355351	2.23451	1.04861e-08	3.47918e-07	0.798722	0.811147	0.78625	0.798706	0.671067	0.682079	0.645855	0.666334	0.132373	0.991155	3.57242e-05	0.000423022	WTvsKO_0h	No
cg29937984_BC21	chr11	92482770	92482772	CG	PMDsoloWCGW	FALSE	+								0.479796	0.632432	0.546095	0.552774	0.180405	0.160741	0.220192	0.187113	0.365662	2.4418	7.86174e-10	7.27482e-08	0.79279	0.779108	0.794041	0.788646	0.674022	0.629924	0.626586	0.643511	0.145135	1.04635	2.83883e-05	0.000377001	WTvsKO_0h	No
cg29938054_TC21	chr11	92504233	92504235	CG	MonoallelicMeth	FALSE	+								0.647493	0.699662	0.648517	0.665224	0.304093	0.252849	0.363802	0.306915	0.35831	2.1816	2.29094e-09	1.34884e-07	0.840251	0.82358	0.819884	0.827905	0.659657	0.622145	0.662214	0.648006	0.179899	1.38635	2.64018e-06	0.00015404	WTvsKO_0h	No
cg29938295_BC21	chr11	92561401	92561403	CG	PMDsoloWCGW	FALSE	+								0.443643	0.535109	0.474245	0.484332	0.14149	0.101983	0.163394	0.135622	0.34871	2.60777	1.3664e-10	2.77551e-08	0.713473	0.738266	0.745835	0.732525	0.49587	0.467081	0.467131	0.476694	0.255831	1.58978	6.21024e-07	0.000126753	WTvsKO_0h	No
cg29938743_BC21	chr11	92666599	92666601	CG	PMDsoloWCGW	FALSE	-								0.622537	0.701038	0.618543	0.647373	0.246348	0.199481	0.353877	0.266569	0.380804	2.37838	4.24487e-09	1.96429e-07	0.781945	0.810821	0.811769	0.801512	0.681682	0.663171	0.673965	0.67294	0.128572	0.975641	4.00772e-05	0.000449524	WTvsKO_0h	No
cg29939637_BC21	chr11	92869661	92869663	CG	Adenoma	FALSE	-								0.706719	0.749515	0.671451	0.709228	0.314655	0.292108	0.363539	0.323434	0.385794	2.3631	3.07536e-10	4.29298e-08	0.840665	0.852504	0.833364	0.842178	0.7086	0.70397	0.734003	0.715525	0.126653	1.08554	1.5804e-05	0.00028538	WTvsKO_0h	No
cg29949186_TC11	chr11	94179700	94179702	CG	Enhancer	FALSE	-								0.124959	0.2807	0.297895	0.234518	0.0399227	0.0263805	0.0207147	0.029006	0.205512	3.31812	4.28039e-10	5.16213e-08	0.81857	0.761012	0.856329	0.811971	0.466757	0.451032	0.183648	0.367146	0.444825	3.01598	0.000110549	0.000792958	WTvsKO_96h	No
cg29958633_BC11	chr11	94938863	94938865	CG	MonoallelicMeth	FALSE	+	Col1a1	Col1a1;Col1a1	protein_coding;protein_coding	ENSMUST00000001547.7;ENSMUST00000148593.1	2640;-148			0.666395	0.796378	0.743133	0.735302	0.404891	0.365942	0.443185	0.404673	0.330629	2.05877	1.78839e-08	4.90712e-07	0.855685	0.88375	0.87741	0.872282	0.76341	0.723905	0.689472	0.725596	0.146686	1.3674	2.03772e-05	0.000320536	WTvsKO_0h	No
cg29964435_BC11	chr11	95305708	95305710	CG	Enhancer	FALSE	-	Kat7	Kat7;Kat7;Kat7;Kat7;Kat7;Kat7;Kat7;Kat7	protein_coding;protein_coding;protein_coding;protein_coding;protein_coding;protein_coding;protein_coding;protein_coding	ENSMUST00000072621.11;ENSMUST00000092766.11;ENSMUST00000103159.9;ENSMUST00000107733.9;ENSMUST00000107734.9;ENSMUST00000144456.7;ENSMUST00000146365.1;ENSMUST00000154327.1	3894;3894;4493;4538;4538;4481;4500;3805		Shelf	0.149169	0.234018	0.250894	0.21136	0.0562053	0.0380551	0.0576046	0.0506217	0.160739	2.32029	4.62729e-09	2.06836e-07	0.640436	0.62113	0.765488	0.675685	0.336777	0.32146	0.352939	0.337059	0.338626	2.0609	1.11335e-05	0.000246066	WTvsKO_96h	No
cg29985494_TC21	chr11	96795964	96795966	CG	GeneBody;Cbx1;NM_007622;inside_[5-UTR;intron_between_exon_1_and_2];splice=0	FALSE	-	Cbx1;Gm11517	Cbx1;Cbx1;Cbx1;Cbx1;Cbx1;Gm11517	protein_coding;protein_coding;protein_coding;protein_coding;protein_coding;processed_pseudogene	ENSMUST00000018810.9;ENSMUST00000079702.3;ENSMUST00000093943.9;ENSMUST00000134585.7;ENSMUST00000141257.1;ENSMUST00000119491.1	6838;6716;6806;6828;6790;-139			0.179688	0.236999	0.256204	0.224297	0.0954342	0.0924172	0.118669	0.102173	0.122124	1.33937	5.54468e-06	2.87747e-05	0.655873	0.581975	0.688678	0.642176	0.312825	0.301763	0.30892	0.307836	0.33434	2.02017	9.24544e-07	0.000130832	WTvsKO_96h	No
cg29991698_BC11	chr11	97184945	97184947	CG	EPIC;cg04057642	FALSE	-	Kpnb1	Kpnb1	protein_coding	ENSMUST00000001479.4	2936		Shelf	0.452104	0.612491	0.625124	0.56324	0.235767	0.18539	0.271995	0.231051	0.332189	2.1245	3.75098e-08	8.01888e-07	0.891787	0.889326	0.921088	0.900734	0.636246	0.624801	0.703457	0.654835	0.245899	2.26855	8.30285e-07	0.000128622	WTvsKO_0h	No
cg29993321_BC21	chr11	97322654	97322656	CG	PseudogeneTSS;chr11:97322489;Gm11594;ENSMUST00000122313;166	FALSE	-	Gm11594;Mrpl45	Gm11594;Mrpl45	processed_pseudogene;protein_coding	ENSMUST00000122313.1;ENSMUST00000019026.9	-165;6939			0.197941	0.306034	0.308798	0.270924	0.110972	0.0998121	0.0985431	0.103109	0.167815	1.66872	4.18104e-07	4.29277e-06	0.780681	0.7456	0.82618	0.784154	0.448009	0.46265	0.368661	0.42644	0.357714	2.30835	1.45577e-06	0.000138181	WTvsKO_96h	No
cg30005610_TC21	chr11	98067084	98067086	CG	Enhancer	FALSE	+								0.181537	0.109384	0.123033	0.137985	0.0441004	0.0216067	0.0306595	0.0321222	0.105863	2.29665	1.24555e-08	3.87843e-07	0.462299	0.312902	0.430944	0.402048	0.0678181	0.0502657	0.0401167	0.0527335	0.349315	3.61583	2.17256e-07	0.000108644	WTvsKO_96h	No
cg30028570_TC21	chr11	99866966	99866968	CG	VMR;chr11:99866847-99867025	FALSE	-								0.528314	0.644023	0.560446	0.577594	0.2119	0.20356	0.216446	0.210635	0.366959	2.36286	3.01307e-10	4.25215e-08	0.804939	0.794832	0.806573	0.802115	0.664684	0.624513	0.59266	0.627286	0.174829	1.26558	1.0753e-05	0.000242669	WTvsKO_0h	No
cg30037580_TC11	chr11	100613395	100613397	CG	TSS;chr11:100613341;Dnajc7;ENSMUST00000146840;-54;1	FALSE	-	Dnajc7	Dnajc7;Dnajc7;Dnajc7;Dnajc7;Dnajc7;Dnajc7;Dnajc7;Dnajc7;Dnajc7;Dnajc7;Dnajc7;Dnajc7	protein_coding;protein_coding;protein_coding;protein_coding;protein_coding;protein_coding;protein_coding;protein_coding;protein_coding;protein_coding;protein_coding;protein_coding	ENSMUST00000014339.14;ENSMUST00000132886.2;ENSMUST00000137688.8;ENSMUST00000146840.2;ENSMUST00000154972.8;ENSMUST00000155152.8;ENSMUST00000239389.1;ENSMUST00000239410.1;ENSMUST00000239418.1;ENSMUST00000239479.1;ENSMUST00000239490.1;ENSMUST00000239499.1	6773;6264;6202;-38;6225;6216;6212;6793;6243;6232;6783;6236			0.117757	0.263001	0.26031	0.213689	0.0351196	0.0390544	0.084008	0.0527274	0.160962	2.31633	5.27534e-07	5.06568e-06	0.650577	0.615877	0.735558	0.667337	0.331663	0.279365	0.291372	0.3008	0.366537	2.23795	1.63327e-06	0.000141065	WTvsKO_96h	No
cg30068142_BC11	chr11	102694390	102694392	CG	Random	FALSE	-	Ccdc43	Ccdc43;Ccdc43;Ccdc43;Ccdc43;Ccdc43	protein_coding;protein_coding;protein_coding;protein_coding;protein_coding	ENSMUST00000092569.12;ENSMUST00000124869.7;ENSMUST00000138147.1;ENSMUST00000153157.7;ENSMUST00000164506.2	3392;3146;3280;3344;3344		Shelf	0.234619	0.283086	0.285865	0.267856	0.0542114	0.0708706	0.0653204	0.0634675	0.204389	2.43635	1.05527e-10	2.43183e-08	0.761687	0.694068	0.798792	0.751516	0.421388	0.34759	0.277803	0.348927	0.402588	2.5305	4.02809e-06	0.000172996	WTvsKO_96h	No
cg30097104_TC11	chr11	105117225	105117227	CG	MonoallelicMeth	FALSE	-	Efcab3;Gm11639	Efcab3;Efcab3;Gm11639	protein_coding;protein_coding;protein_coding	ENSMUST00000021029.5;ENSMUST00000154543.1;ENSMUST00000212287.1	25020;4570;431519			0.646639	0.737864	0.631287	0.67193	0.340185	0.215208	0.205108	0.2535	0.41843	2.63912	8.28743e-10	7.47608e-08	0.899932	0.92727	0.920567	0.915923	0.818926	0.768258	0.618627	0.73527	0.180653	1.92394	0.000214374	0.00118732	WTvsKO_0h	No
cg30097654_BC11	chr11	105156890	105156892	CG	Enhancer	FALSE	-								0.256551	0.426726	0.439456	0.374244	0.17027	0.103461	0.0893508	0.121028	0.253217	2.14581	2.19697e-07	2.70168e-06	0.652406	0.610296	0.702039	0.654914	0.334661	0.29385	0.215507	0.281339	0.373575	2.30408	3.60315e-06	0.000168391	WTvsKO_96h	No
cg30104783_BC11	chr11	105969029	105969031	CG	VMR;chr11:105968908-105969152	FALSE	+	Ace;Gm11651	Ace;Gm11651	protein_coding;antisense	ENSMUST00000001963.13;ENSMUST00000152925.1	1085;16665		Shore	0.535547	0.678392	0.589667	0.601202	0.29901	0.217266	0.292185	0.269487	0.331715	2.05338	2.30091e-08	5.80267e-07	0.768532	0.850324	0.787377	0.802078	0.698008	0.635316	0.517492	0.616939	0.185139	1.33856	0.00116759	0.00360636	WTvsKO_0h	No
cg30121845_BC11	chr11	107337626	107337628	CG	TSS;chr11:107337636;Pitpnc1;ENSMUST00000040380;+10;1	FALSE	-	Gm11716;Pitpnc1	Gm11716;Pitpnc1;Pitpnc1;Pitpnc1;Pitpnc1	antisense;protein_coding;protein_coding;protein_coding;protein_coding	ENSMUST00000154414.1;ENSMUST00000040380.12;ENSMUST00000103064.9;ENSMUST00000134763.1;ENSMUST00000146680.1	-423;11;133073;10504;-100			0.416642	0.586845	0.554312	0.519267	0.185149	0.177613	0.202047	0.18827	0.330997	2.22198	4.68466e-09	2.08301e-07	0.853662	0.886465	0.895511	0.878546	0.701838	0.690405	0.633484	0.675242	0.203304	1.80904	3.66714e-06	0.000168872	WTvsKO_0h	No
cg30122886_TC11	chr11	107408435	107408437	CG	Enhancer	FALSE	+	Pitpnc1	Pitpnc1	protein_coding	ENSMUST00000103064.9	62264			0.544755	0.630734	0.603971	0.593153	0.279785	0.183853	0.168568	0.210735	0.382418	2.48562	8.02074e-10	7.34889e-08	0.877142	0.870177	0.880436	0.875918	0.719879	0.674384	0.554601	0.649621	0.226297	1.91085	1.8359e-05	0.000304502	WTvsKO_0h	No
cg30134745_BC11	chr11	108381035	108381037	CG	TSS;chr11:108381163;Apoh;ENSMUST00000146050;-128;1,TSS;chr11:108381168;Apoh;ENSMUST00000152958;-133;1	FALSE	+	Apoh;Gm11656	Apoh;Apoh;Apoh;Gm11656	protein_coding;protein_coding;protein_coding;sense_intronic	ENSMUST00000133383.7;ENSMUST00000146050.1;ENSMUST00000152958.7;ENSMUST00000137462.1	37682;-128;-133;3143			0.614731	0.770117	0.676159	0.687002	0.343197	0.256083	0.371968	0.323749	0.363253	2.23699	1.68749e-08	4.73068e-07	0.85498	0.860484	0.86129	0.858918	0.752598	0.670972	0.703124	0.708898	0.15002	1.31393	1.80035e-05	0.000301506	WTvsKO_0h	No
cg30153523_TC11	chr11	110163257	110163259	CG	Random	FALSE	+	Abca9	Abca9;Abca9	protein_coding;protein_coding	ENSMUST00000044850.3;ENSMUST00000126499.1	4939;4798			0.662891	0.723319	0.694003	0.693404	0.31692	0.251267	0.412424	0.32687	0.366534	2.24573	5.33969e-09	2.26765e-07	0.9043	0.901747	0.893672	0.899906	0.745231	0.719392	0.725023	0.729882	0.170024	1.73471	2.25279e-07	0.000108644	WTvsKO_0h	No
cg30165018_BC21	chr11	111569348	111569350	CG	EnhancerVista;chr11:111568522-111569439	FALSE	+								0.7378	0.792358	0.745206	0.758455	0.408801	0.337471	0.45637	0.400881	0.357574	2.2436	1.48263e-09	1.04078e-07	0.918652	0.918055	0.914245	0.916984	0.814833	0.79706	0.812003	0.807965	0.109019	1.39181	1.12163e-06	0.000133662	WTvsKO_0h	No
cg30165233_BC21	chr11	111605487	111605489	CG	MonoallelicMeth	FALSE	+								0.451976	0.521335	0.439613	0.470975	0.123115	0.119236	0.154398	0.13225	0.338725	2.55522	5.9219e-11	1.75786e-08	0.670515	0.728326	0.690004	0.696282	0.424108	0.419175	0.403246	0.41551	0.280772	1.69317	7.16279e-07	0.000127457	WTvsKO_0h	No
cg30165400_TC21	chr11	111627684	111627686	CG	EnhancerVista;chr11:111627111-111628109	FALSE	+								0.629914	0.739972	0.623596	0.664494	0.293677	0.265829	0.342908	0.300805	0.363689	2.22481	3.60002e-09	1.77574e-07	0.838724	0.824026	0.830441	0.831064	0.73031	0.72142	0.737322	0.729684	0.10138	0.866377	5.61974e-05	0.000539081	WTvsKO_0h	No
cg30165543_TC11	chr11	111648499	111648501	CG	EnhancerVista;chr11:111647327-111648996	FALSE	-								0.776452	0.764742	0.753506	0.7649	0.439884	0.355817	0.456116	0.417273	0.347628	2.18931	1.02892e-09	8.51894e-08	0.909891	0.868527	0.8893	0.889239	0.807929	0.800137	0.742347	0.783471	0.105769	1.1551	0.000252067	0.00131595	WTvsKO_0h	No
cg30198304_BC11	chr11	114485880	114485882	CG	Enhancer	FALSE	-								0.44479	0.648593	0.566174	0.553186	0.296172	0.185223	0.182691	0.221362	0.331824	2.16527	9.62062e-08	1.51619e-06	0.826538	0.827811	0.841449	0.831932	0.668306	0.634089	0.359597	0.553997	0.277935	1.98481	0.000756439	0.0026903	WTvsKO_0h	No
cg30209970_BC21	chr11	115335779	115335781	CG	MonoallelicMeth,Random	FALSE	+	Otop3	Otop3;Otop3	protein_coding;protein_coding	ENSMUST00000019006.4;ENSMUST00000106543.7	1046;1049		Shore	0.524066	0.58065	0.482834	0.529183	0.191275	0.142672	0.216105	0.18335	0.345833	2.34516	9.01213e-10	7.85237e-08	0.630034	0.699568	0.680353	0.669985	0.426	0.357891	0.388189	0.390694	0.279291	1.66903	3.06349e-06	0.000160642	WTvsKO_0h	No
cg30211404_TC11	chr11	115418591	115418593	CG	TSS;chr11:115418740;Atp5h;ENSMUST00000137754;+149;1	FALSE	-	Atp5h	Atp5h;Atp5h;Atp5h;Atp5h;Atp5h;Atp5h;Atp5h	protein_coding;protein_coding;protein_coding;protein_coding;protein_coding;protein_coding;protein_coding	ENSMUST00000043931.8;ENSMUST00000073791.9;ENSMUST00000106537.7;ENSMUST00000137563.7;ENSMUST00000137754.1;ENSMUST00000138779.1;ENSMUST00000180072.7	1371;1371;1326;-569;150;482;-84		Shore	0.452282	0.588407	0.573132	0.53794	0.142211	0.154828	0.228787	0.175275	0.362665	2.48625	1.43236e-09	1.02257e-07	0.80508	0.853525	0.872363	0.843656	0.628853	0.643691	0.602699	0.625081	0.218575	1.71558	7.25916e-06	0.000207913	WTvsKO_0h	No
cg30226525_TC21	chr11	116307417	116307419	CG	TSS;chr11:116307232;Exoc7;ENSMUST00000124281;-185;2	FALSE	-	Exoc7	Exoc7;Exoc7;Exoc7;Exoc7;Exoc7;Exoc7;Exoc7	protein_coding;protein_coding;protein_coding;protein_coding;protein_coding;protein_coding;protein_coding	ENSMUST00000021147.13;ENSMUST00000106411.9;ENSMUST00000106413.9;ENSMUST00000124281.1;ENSMUST00000126731.7;ENSMUST00000133468.1;ENSMUST00000139699.7	-683;-683;-683;-184;-765;-690;-683		Shore	0.39913	0.481725	0.475355	0.45207	0.160614	0.139812	0.177001	0.159142	0.292928	2.12867	1.73824e-09	1.14493e-07	0.775715	0.757852	0.792772	0.775446	0.407629	0.425718	0.427309	0.420219	0.355228	2.25516	2.89139e-08	4.44288e-05	WTvsKO_96h	No
cg30229221_TC11	chr11	116465867	116465869	CG	EPIC;cg00150989	FALSE	+	Gm11739;Qrich2	Gm11739;Qrich2	antisense;protein_coding	ENSMUST00000125269.1;ENSMUST00000208602.1	-451;374			0.772014	0.870868	0.807588	0.816823	0.380455	0.26637	0.381819	0.342881	0.473942	3.14765	2.72436e-11	1.07663e-08	0.948738	0.954462	0.95475	0.95265	0.851674	0.819398	0.784889	0.818654	0.133997	2.14268	5.61192e-07	0.000123708	WTvsKO_0h	No
cg30229626_TC11	chr11	116489108	116489110	CG	Enhancer	FALSE	-	Prpsap1	Prpsap1;Prpsap1;Prpsap1;Prpsap1;Prpsap1;Prpsap1	protein_coding;protein_coding;protein_coding;protein_coding;protein_coding;protein_coding	ENSMUST00000106391.7;ENSMUST00000130835.7;ENSMUST00000135196.1;ENSMUST00000144154.1;ENSMUST00000152496.7;ENSMUST00000152874.7	1240;1181;1227;1219;5094;1206		Shore	0.171241	0.29268	0.325351	0.263091	0.0786235	0.0433942	0.0402845	0.0541007	0.20899	2.66244	5.14387e-09	2.21181e-07	0.607323	0.575902	0.679977	0.621067	0.283497	0.20823	0.170698	0.220809	0.400259	2.56762	2.43693e-06	0.000150669	WTvsKO_96h	No
cg30231095_TC11	chr11	116573745	116573747	CG	Enhancer	FALSE	-	Ube2o	Ube2o	protein_coding	ENSMUST00000082152.4	7702			0.360552	0.566007	0.572517	0.499692	0.159745	0.143218	0.165767	0.156243	0.343449	2.42835	6.13015e-09	2.47536e-07	0.816874	0.803522	0.861973	0.827457	0.593906	0.573152	0.419829	0.528962	0.298494	2.10834	2.42054e-05	0.000348066	WTvsKO_0h	No
cg30235551_BC11	chr11	116850234	116850236	CG	Random	FALSE	-	Mettl23;Srsf2	Mettl23;Mettl23;Srsf2;Srsf2;Srsf2;Srsf2;Srsf2;Srsf2	protein_coding;protein_coding;protein_coding;protein_coding;protein_coding;protein_coding;protein_coding;protein_coding	ENSMUST00000143184.1;ENSMUST00000175930.7;ENSMUST00000092404.12;ENSMUST00000136914.7;ENSMUST00000138484.2;ENSMUST00000176834.7;ENSMUST00000177429.1;ENSMUST00000190993.6	1334;6680;2860;2838;1985;1852;1337;2838		Shore	0.122096	0.249985	0.310478	0.22752	0.079551	0.0439613	0.0674974	0.0636699	0.16385	2.06037	1.37453e-06	1.01666e-05	0.64164	0.614105	0.719715	0.658487	0.243521	0.307508	0.250029	0.267019	0.391468	2.42078	7.2196e-07	0.000127645	WTvsKO_96h	No
cg30235553_TC21	chr11	116850350	116850352	CG	GeneBody;Srsf2;NM_011358;inside_[3-UTR;noncoding_exon_3];splice=0	FALSE	-	Mettl23;Srsf2	Mettl23;Mettl23;Srsf2;Srsf2;Srsf2;Srsf2;Srsf2;Srsf2	protein_coding;protein_coding;protein_coding;protein_coding;protein_coding;protein_coding;protein_coding;protein_coding	ENSMUST00000143184.1;ENSMUST00000175930.7;ENSMUST00000092404.12;ENSMUST00000136914.7;ENSMUST00000138484.2;ENSMUST00000176834.7;ENSMUST00000177429.1;ENSMUST00000190993.6	1450;6796;2744;2722;1869;1736;1221;2722		Shore	0.177557	0.256099	0.280349	0.238002	0.0648815	0.0814593	0.0721345	0.0728251	0.165176	1.97317	2.25271e-08	5.7224e-07	0.583024	0.637991	0.737163	0.652726	0.304616	0.322001	0.311488	0.312702	0.340025	2.06609	7.0826e-06	0.000206041	WTvsKO_96h	No
cg30237908_TC11	chr11	116990299	116990301	CG	Enhancer	FALSE	-								0.509559	0.66181	0.607722	0.59303	0.275871	0.20334	0.158302	0.212504	0.380526	2.47608	3.05305e-09	1.6045e-07	0.891274	0.882108	0.897199	0.890194	0.781002	0.741213	0.534568	0.685594	0.204599	1.8373	0.000519242	0.00209911	WTvsKO_0h	No
cg30272978_TC11	chr11	119259225	119259227	CG	Enhancer	FALSE	-	Ccdc40	Ccdc40;Ccdc40;Ccdc40;Ccdc40;Ccdc40;Ccdc40	protein_coding;protein_coding;protein_coding;protein_coding;protein_coding;protein_coding	ENSMUST00000053440.7;ENSMUST00000126652.1;ENSMUST00000133788.7;ENSMUST00000155683.1;ENSMUST00000235971.1;ENSMUST00000236813.1	30097;299;5673;-540;30654;30628			0.8016	0.881534	0.811549	0.831561	0.507059	0.390284	0.374047	0.423797	0.407765	2.78741	2.11419e-10	3.49315e-08	0.920026	0.960232	0.932305	0.937521	0.903213	0.848595	0.759413	0.837074	0.100447	1.51143	0.00328542	0.00746756	WTvsKO_0h	No
cg30321321_BO11	chr12	4231606	4231608	CG	Random	FALSE	-								0.687912	0.768182	0.723303	0.726466	0.404156	0.327067	0.454923	0.395382	0.331084	2.03892	1.38413e-08	4.15924e-07	0.916581	0.907339	0.900857	0.908259	0.82899	0.819695	0.827977	0.825554	0.0827051	1.06808	1.63488e-05	0.000289632	WTvsKO_0h	No
cg30326200_TC21	chr12	4812327	4812329	CG	Enhancer	FALSE	+	CT025683.1	CT025683.1	unitary_pseudogene	ENSMUST00000239170.1	1834			0.494669	0.614046	0.509233	0.539316	0.202691	0.166036	0.231731	0.200153	0.339163	2.24198	2.41903e-09	1.38878e-07	0.762543	0.782503	0.758878	0.767975	0.56232	0.529077	0.554331	0.548576	0.219399	1.44669	1.23991e-06	0.00013617	WTvsKO_0h	No
cg30333828_BC11	chr12	5591225	5591227	CG	PseudogeneTSS;chr12:5590624;Gm5652;ENSMUST00000182336;602	FALSE	-	Gm48599;Gm5652	Gm48599;Gm5652	processed_pseudogene;processed_pseudogene	ENSMUST00000219669.1;ENSMUST00000182336.1	307;-601			0.756081	0.830757	0.784096	0.790311	0.474534	0.437194	0.4453	0.452343	0.337969	2.2055	1.03986e-09	8.57691e-08	0.911755	0.912164	0.889773	0.904564	0.796864	0.778136	0.778706	0.784569	0.119995	1.38702	4.759e-06	0.00018021	WTvsKO_0h	No
cg30339907_TC21	chr12	6882736	6882738	CG	Random	FALSE	-								0.724668	0.780025	0.71652	0.740405	0.3728	0.325836	0.41712	0.371919	0.368486	2.28077	7.32149e-10	6.98507e-08	0.857029	0.872772	0.882112	0.870638	0.794775	0.716892	0.750545	0.754071	0.116567	1.12748	0.000119625	0.000830988	WTvsKO_0h	No
cg30345204_BC11	chr12	7949095	7949097	CG	Random	FALSE	+	Gm48633	Gm48633	lincRNA	ENSMUST00000218264.1	966			0.574158	0.654054	0.666091	0.631434	0.306638	0.260009	0.23062	0.265756	0.365679	2.25682	1.12823e-09	8.91999e-08	0.700805	0.76644	0.760006	0.742417	0.674963	0.609904	0.553289	0.612718	0.129699	0.865892	0.00252942	0.00619581	WTvsKO_0h	No
cg30345735_BC11	chr12	8016004	8016006	CG	EPIC;cg05333014	FALSE	+	Apob	Apob;Apob;Apob	protein_coding;protein_coding;protein_coding	ENSMUST00000037520.13;ENSMUST00000037811.12;ENSMUST00000171239.1	38226;38357;3646			0.701056	0.742392	0.685739	0.709729	0.309551	0.284315	0.396156	0.330007	0.379721	2.32655	7.31227e-10	6.98222e-08	0.850292	0.870403	0.859124	0.85994	0.74661	0.656841	0.733908	0.712453	0.147487	1.30086	4.36081e-05	0.000470521	WTvsKO_0h	No
cg30363338_TC11	chr12	10368647	10368649	CG	PseudogeneTSS;chr12:10368670;Gm48794;ENSMUST00000219281;21	FALSE	+	Gm48794;Nt5c1b	Gm48794;Nt5c1b;Nt5c1b;Nt5c1b;Nt5c1b;Nt5c1b;Nt5c1b;Nt5c1b;Nt5c1b;Nt5c1b;Nt5c1b;Nt5c1b;Nt5c1b;Nt5c1b;Nt5c1b;Nt5c1b;Nt5c1b;Nt5c1b	processed_pseudogene;protein_coding;protein_coding;protein_coding;protein_coding;protein_coding;protein_coding;protein_coding;protein_coding;protein_coding;protein_coding;protein_coding;protein_coding;protein_coding;protein_coding;protein_coding;protein_coding;protein_coding	ENSMUST00000219281.1;ENSMUST00000002456.9;ENSMUST00000118657.7;ENSMUST00000143739.8;ENSMUST00000147323.7;ENSMUST00000217944.1;ENSMUST00000218026.1;ENSMUST00000218287.1;ENSMUST00000218327.1;ENSMUST00000218339.2;ENSMUST00000218417.1;ENSMUST00000218551.1;ENSMUST00000219049.1;ENSMUST00000219292.1;ENSMUST00000219826.1;ENSMUST00000220257.1;ENSMUST00000220611.1;ENSMUST00000223534.1	23;-1325;-1331;-1325;-1325;-1325;-1325;-1325;-1325;-1325;-1346;-1325;-1325;-1325;-1325;-1325;-1325;-1331			0.548379	0.71426	0.620045	0.627561	0.248737	0.193511	0.277515	0.239921	0.38764	2.44756	1.99727e-09	1.24191e-07	0.794897	0.833008	0.840808	0.822905	0.730924	0.685676	0.674852	0.697151	0.125754	1.01784	0.000173906	0.0010422	WTvsKO_0h	No
cg30363864_TC21	chr12	10446521	10446523	CG	lincRNATSS;chr12:10446388;Gm38407;ENSMUST00000219221;134	FALSE	-	Gm38407	Gm38407	lincRNA	ENSMUST00000219221.1	134			0.63797	0.730141	0.643808	0.67064	0.326471	0.245645	0.389496	0.320537	0.350102	2.13972	1.63674e-08	4.64018e-07	0.831263	0.824309	0.830493	0.828688	0.703327	0.668059	0.681526	0.684304	0.144384	1.15711	6.81335e-06	0.00020315	WTvsKO_0h	No
cg30371137_TC21	chr12	11615605	11615607	CG	Adenoma	FALSE	+								0.526792	0.531799	0.491054	0.516548	0.193286	0.163191	0.193614	0.183364	0.333185	2.25494	2.64631e-10	3.95305e-08	0.748957	0.755791	0.782168	0.762305	0.533726	0.478301	0.498801	0.503609	0.258696	1.66279	8.61446e-07	0.000129562	WTvsKO_0h	No
cg30371762_TC11	chr12	11741148	11741150	CG	Random	FALSE	-								0.482819	0.675283	0.584255	0.580786	0.159666	0.138498	0.193903	0.164022	0.416763	2.84551	1.45663e-10	2.87482e-08	0.809107	0.85653	0.837257	0.834298	0.617506	0.538285	0.598516	0.584769	0.249529	1.84532	2.16478e-06	0.000147207	WTvsKO_0h	No
cg30376767_BC11	chr12	12567874	12567876	CG	EPIC;cg01352230	FALSE	-								0.606928	0.712971	0.667047	0.662315	0.313203	0.240989	0.341314	0.298502	0.363813	2.22609	3.18429e-09	1.64549e-07	0.830296	0.845084	0.899471	0.858284	0.76158	0.675894	0.682845	0.706773	0.151511	1.3525	0.00038673	0.00173386	WTvsKO_0h	No
cg30441774_TC11	chr12	21285282	21285284	CG	EPIC;cg23092028,TSS;chr12:21285390;Cpsf3;ENSMUST00000221711;-108;2	FALSE	+	Cpsf3;Itgb1bp1	Cpsf3;Cpsf3;Cpsf3;Cpsf3;Cpsf3;Cpsf3;Itgb1bp1;Itgb1bp1;Itgb1bp1;Itgb1bp1	protein_coding;protein_coding;protein_coding;protein_coding;protein_coding;protein_coding;protein_coding;protein_coding;protein_coding;protein_coding	ENSMUST00000067284.9;ENSMUST00000221145.1;ENSMUST00000221507.1;ENSMUST00000221711.1;ENSMUST00000222474.1;ENSMUST00000222968.1;ENSMUST00000076260.11;ENSMUST00000172834.1;ENSMUST00000173729.7;ENSMUST00000232072.1	-1075;-1116;-242;-108;-690;-1116;1002;903;815;937		Shore	0.406643	0.501055	0.466411	0.458037	0.133246	0.0975614	0.148895	0.126567	0.331469	2.56428	1.44573e-10	2.86387e-08	0.584951	0.656501	0.637945	0.626466	0.471369	0.466418	0.418132	0.451973	0.174493	1.02766	0.000112696	0.000802033	WTvsKO_0h	No
cg30463668_BC11	chr12	24712819	24712821	CG	GeneBody;Rrm2;NM_009104;inside_[intron_between_exon_8_and_9];splice=0	FALSE	+	Rrm2	Rrm2;Rrm2	protein_coding;protein_coding	ENSMUST00000020980.11;ENSMUST00000154588.1	4579;3791			0.45745	0.714288	0.692158	0.621298	0.16634	0.155122	0.258785	0.193416	0.427882	2.8445	6.98043e-09	2.68779e-07	0.958419	0.962292	0.974947	0.965219	0.794458	0.807414	0.865806	0.822559	0.14266	2.59145	1.86086e-06	0.0001425	WTvsKO_0h	No
cg30491861_BC21	chr12	28633031	28633033	CG	GeneBody;Rps7;NM_011300;inside_[intron_between_exon_5_and_6];splice=0	FALSE	+	Rps7	Rps7;Rps7;Rps7;Rps7;Rps7	protein_coding;protein_coding;protein_coding;protein_coding;protein_coding	ENSMUST00000074267.4;ENSMUST00000221871.1;ENSMUST00000222808.1;ENSMUST00000223153.1;ENSMUST00000223318.1	2922;2826;877;-1114;-641		Shelf	0.190468	0.265317	0.292649	0.249478	0.0599275	0.066052	0.0712196	0.065733	0.183745	2.22265	1.93355e-09	1.21728e-07	0.563101	0.563166	0.671305	0.599191	0.222881	0.223366	0.275745	0.240664	0.358527	2.25188	1.51554e-06	0.000140138	WTvsKO_96h	No
cg30526024_BC11	chr12	32878317	32878319	CG	lincRNATSS;chr12:32878305;Gm47948;ENSMUST00000219636;13	FALSE	+	Gm47948	Gm47948	lincRNA	ENSMUST00000219636.1	13			0.581196	0.692303	0.645613	0.639704	0.285234	0.231975	0.299884	0.272364	0.36734	2.26123	1.335e-09	9.85016e-08	0.851066	0.873176	0.878159	0.867467	0.68781	0.6494	0.557294	0.631501	0.235966	1.92886	5.67597e-06	0.000191415	WTvsKO_0h	No
cg30553679_BC21	chr12	36610878	36610880	CG	GeneBody;Ispd;NM_001289502;inside_[intron_between_exon_8_and_9];splice=0	FALSE	-	Crppa	Crppa;Crppa;Crppa	protein_coding;protein_coding;protein_coding	ENSMUST00000062041.5;ENSMUST00000221177.1;ENSMUST00000223205.1	229360;228699;229122			0.636734	0.686047	0.626381	0.649721	0.291906	0.262821	0.346012	0.300247	0.349474	2.12257	2.06715e-09	1.26578e-07	0.844357	0.842612	0.854536	0.847168	0.697083	0.685042	0.722038	0.701388	0.145781	1.238	4.91695e-06	0.000182057	WTvsKO_0h	No
cg30555088_BC21	chr12	36878068	36878070	CG	lincRNATSS;chr12:36877965;Gm40394;ENSMUST00000221321;104	FALSE	-	Gm40394	Gm40394	lincRNA	ENSMUST00000221321.1	104			0.677382	0.68596	0.651719	0.671687	0.303787	0.2533	0.316389	0.291158	0.380529	2.32298	2.0246e-10	3.41865e-08	0.817689	0.813501	0.804509	0.811899	0.623987	0.577098	0.629586	0.610224	0.201676	1.46221	1.78618e-06	0.000141929	WTvsKO_0h	No
cg30555525_TC21	chr12	36969829	36969831	CG	PseudogeneTSS;chr12:36969150;Gm18026;ENSMUST00000222789;680	FALSE	-	Gm18026	Gm18026	processed_pseudogene	ENSMUST00000222789.1	-679			0.53865	0.68933	0.581482	0.603154	0.174405	0.154192	0.288573	0.205723	0.397431	2.61604	2.95359e-09	1.57231e-07	0.78625	0.784917	0.788399	0.786522	0.579103	0.556109	0.622776	0.585996	0.200526	1.37849	3.6881e-06	0.000168936	WTvsKO_0h	No
cg30560653_TC11	chr12	38089324	38089326	CG	Random	FALSE	-	Dgkb;Gm35755	Dgkb;Dgkb;Dgkb;Dgkb;Dgkb;Dgkb;Gm35755	protein_coding;protein_coding;protein_coding;protein_coding;protein_coding;protein_coding;processed_pseudogene	ENSMUST00000040500.8;ENSMUST00000220606.1;ENSMUST00000220990.1;ENSMUST00000221098.1;ENSMUST00000221176.1;ENSMUST00000221540.1;ENSMUST00000222392.1	208620;70145;208988;208609;209151;208778;-577			0.561313	0.730989	0.702477	0.664926	0.290102	0.206602	0.316079	0.270928	0.393999	2.46101	4.93693e-09	2.15248e-07	0.883657	0.894904	0.865672	0.881411	0.790498	0.764929	0.7023	0.752576	0.128835	1.28231	8.47723e-05	0.000680376	WTvsKO_0h	No
cg30561667_TC11	chr12	38304752	38304754	CG	MonoallelicMeth	FALSE	+	Dgkb	Dgkb;Dgkb;Dgkb	protein_coding;protein_coding;protein_coding	ENSMUST00000040500.8;ENSMUST00000220990.1;ENSMUST00000221540.1	424048;424416;424206			0.586643	0.773149	0.661868	0.673887	0.262583	0.265263	0.313456	0.280434	0.393453	2.44455	3.17728e-09	1.64447e-07	0.806808	0.855304	0.845353	0.835821	0.696378	0.62615	0.688041	0.67019	0.165632	1.33113	3.83782e-05	0.000439488	WTvsKO_0h	No
cg30561683_BC11	chr12	38307879	38307881	CG	Random	FALSE	-	Dgkb	Dgkb;Dgkb;Dgkb	protein_coding;protein_coding;protein_coding	ENSMUST00000040500.8;ENSMUST00000220990.1;ENSMUST00000221540.1	427175;427543;427333			0.604414	0.732503	0.725875	0.687597	0.363887	0.206738	0.327994	0.29954	0.388057	2.41678	1.03716e-08	3.45436e-07	0.868034	0.857949	0.874254	0.866746	0.814836	0.789325	0.761806	0.788656	0.07809	0.796338	0.000501333	0.00205254	WTvsKO_0h	No
cg30587015_BC21	chr12	42723851	42723853	CG	PMDsoloWCGW	FALSE	+								0.497285	0.495909	0.461118	0.484771	0.0868908	0.0757465	0.156739	0.106459	0.378312	3.05535	3.38615e-11	1.24933e-08	0.640437	0.66588	0.664834	0.65705	0.339222	0.315596	0.360763	0.338527	0.318523	1.90661	1.51352e-07	0.000100085	WTvsKO_0h	No
cg30587146_BC21	chr12	42757632	42757634	CG	PMDsoloWCGW	FALSE	-								0.490587	0.593802	0.487826	0.524072	0.164359	0.138357	0.202046	0.168254	0.355817	2.46318	4.03653e-10	5.04025e-08	0.748265	0.757246	0.779188	0.761566	0.516875	0.481123	0.523435	0.507144	0.254422	1.6361	6.62437e-07	0.000127457	WTvsKO_0h	No
cg30587507_BC21	chr12	42848939	42848941	CG	PMDsoloWCGW	FALSE	+								0.599617	0.666704	0.609872	0.625398	0.247551	0.196393	0.303258	0.249067	0.37633	2.35472	8.63077e-10	7.66844e-08	0.825524	0.82816	0.838504	0.830729	0.689982	0.647509	0.661635	0.666376	0.164354	1.29615	3.6555e-06	0.000168872	WTvsKO_0h	No
cg30588042_TC11	chr12	42973037	42973039	CG	Random	FALSE	+	Gm33340	Gm33340;Gm33340;Gm33340	lincRNA;lincRNA;lincRNA	ENSMUST00000219475.1;ENSMUST00000219846.1;ENSMUST00000220044.1	61180;61145;42422			0.504339	0.626916	0.599848	0.577034	0.236987	0.225956	0.26761	0.243517	0.333517	2.0912	4.45987e-09	2.02082e-07	0.8452	0.84742	0.850742	0.847787	0.676451	0.624829	0.62499	0.64209	0.205698	1.63217	7.50923e-07	0.000128621	WTvsKO_0h	No
cg30588090_TC21	chr12	42987857	42987859	CG	PMDsoloWCGW	FALSE	-	Gm33340	Gm33340;Gm33340;Gm33340	lincRNA;lincRNA;lincRNA	ENSMUST00000219475.1;ENSMUST00000219846.1;ENSMUST00000220044.1	46360;46325;27602			0.564069	0.679332	0.633013	0.625471	0.255368	0.21295	0.338576	0.268964	0.356507	2.21244	8.05089e-09	2.94078e-07	0.791362	0.816031	0.82308	0.810158	0.693999	0.67299	0.650288	0.672426	0.137732	1.05763	3.59716e-05	0.000424546	WTvsKO_0h	No
cg30588718_TC21	chr12	43158892	43158894	CG	PMDsoloWCGW	FALSE	+								0.667503	0.721471	0.655381	0.681452	0.34661	0.258681	0.420978	0.34209	0.339362	2.06643	2.55101e-08	6.2069e-07	0.842252	0.838046	0.845489	0.841929	0.739543	0.683208	0.756461	0.726404	0.115525	0.996885	0.000128803	0.000868822	WTvsKO_0h	No
cg30589306_TC21	chr12	43306744	43306746	CG	lincRNATSS;chr12:43306143;Gm47030;ENSMUST00000217732;602	FALSE	+	Gm47030	Gm47030	lincRNA	ENSMUST00000217732.1	602			0.587353	0.674605	0.619737	0.627232	0.255543	0.216121	0.369297	0.28032	0.346912	2.14648	1.96442e-08	5.20957e-07	0.832411	0.853945	0.825041	0.837132	0.67994	0.630816	0.676816	0.662524	0.174608	1.39037	5.4322e-06	0.000188917	WTvsKO_0h	No
cg30589924_TC11	chr12	43472404	43472406	CG	PMDsoloWCGW	FALSE	-								0.441908	0.598818	0.457904	0.499543	0.155605	0.118638	0.163493	0.145912	0.353632	2.56199	5.19811e-10	5.73415e-08	0.693302	0.733384	0.735465	0.720717	0.466193	0.4467	0.471094	0.461329	0.259388	1.59427	8.37874e-07	0.000128952	WTvsKO_0h	No
cg30589982_BC21	chr12	43486557	43486559	CG	PMDsoloWCGW	FALSE	-								0.542471	0.627223	0.558567	0.576087	0.21838	0.192291	0.273279	0.227983	0.348104	2.21903	1.72116e-09	1.14053e-07	0.78455	0.791837	0.796682	0.791023	0.588466	0.542666	0.614507	0.58188	0.209143	1.44226	3.19393e-06	0.000162347	WTvsKO_0h	No
cg30590465_BC21	chr12	43598435	43598437	CG	PMDsoloWCGW	FALSE	+								0.641591	0.726493	0.674501	0.680862	0.327039	0.291392	0.429835	0.349422	0.33144	2.01042	2.63631e-08	6.3342e-07	0.868368	0.852017	0.875604	0.86533	0.782228	0.763478	0.772892	0.772866	0.0924634	0.920103	6.63315e-05	0.000591996	WTvsKO_0h	No
cg30591754_TC21	chr12	43875200	43875202	CG	Adenoma	FALSE	+								0.54145	0.693365	0.625587	0.620134	0.215343	0.189559	0.320028	0.241643	0.378491	2.40206	6.37305e-09	2.53852e-07	0.792639	0.794988	0.80246	0.796696	0.641867	0.597204	0.64195	0.627007	0.169689	1.21993	6.55186e-06	0.000200415	WTvsKO_0h	No
cg30603674_TC21	chr12	45978947	45978949	CG	MonoallelicMeth	FALSE	+								0.417069	0.569277	0.538102	0.508149	0.150774	0.100919	0.227671	0.159788	0.348361	2.51697	1.11787e-08	3.61936e-07	0.743981	0.743341	0.736022	0.741114	0.513913	0.508978	0.521802	0.514898	0.226217	1.4315	6.46652e-07	0.000127457	WTvsKO_0h	No
cg30604537_BC21	chr12	46174083	46174085	CG	PMDsoloWCGW	FALSE	+								0.50513	0.515636	0.568507	0.529758	0.188311	0.157972	0.228453	0.191579	0.338179	2.26519	7.9759e-10	7.33364e-08	0.6967	0.706813	0.737864	0.713793	0.530312	0.52626	0.536637	0.53107	0.182723	1.14124	1.04093e-05	0.000239859	WTvsKO_0h	No
cg30604955_BC21	chr12	46267863	46267865	CG	Adenoma	FALSE	+								0.539065	0.646052	0.5281	0.571072	0.200239	0.184605	0.284423	0.223089	0.347983	2.24277	6.11396e-09	2.47035e-07	0.77572	0.830845	0.811153	0.805906	0.679903	0.593291	0.668254	0.647149	0.158757	1.18245	0.000136652	0.000900047	WTvsKO_0h	No
cg30605923_TC21	chr12	46479506	46479508	CG	PseudogeneTSS;chr12:46479327;Gm7422;ENSMUST00000220115;180	FALSE	+	Gm7422	Gm7422	processed_pseudogene	ENSMUST00000220115.1	-179			0.585796	0.67679	0.5939	0.618829	0.252708	0.187172	0.351787	0.263889	0.354939	2.22641	2.13601e-08	5.51833e-07	0.850317	0.844318	0.824044	0.83956	0.697298	0.651532	0.703871	0.684234	0.155326	1.27234	1.12312e-05	0.000246705	WTvsKO_0h	No
cg30606837_TC21	chr12	46667109	46667111	CG	lincRNATSS;chr12:46667317;B230217J21Rik;ENSMUST00000218349;206	FALSE	+	B230217J21Rik;Gm48535	B230217J21Rik;Gm48535	lincRNA;lincRNA	ENSMUST00000218349.1;ENSMUST00000217951.1	-207;-1400			0.588582	0.664139	0.597121	0.616614	0.276673	0.255248	0.293859	0.27526	0.341354	2.08803	1.78627e-09	1.15987e-07	0.800076	0.829232	0.805086	0.811465	0.69918	0.672052	0.669455	0.680229	0.131235	1.0189	3.63994e-05	0.000427511	WTvsKO_0h	No
cg30607141_TC21	chr12	46720805	46720807	CG	TSS;chr12:46720858;Nova1;ENSMUST00000219886;+53;1	FALSE	+	Nova1	Nova1;Nova1;Nova1;Nova1;Nova1	protein_coding;protein_coding;protein_coding;protein_coding;protein_coding	ENSMUST00000021438.7;ENSMUST00000218829.1;ENSMUST00000219330.1;ENSMUST00000219886.1;ENSMUST00000220258.1	98124;97970;96155;54;97185			0.742375	0.785361	0.703102	0.743612	0.41439	0.384632	0.438014	0.412346	0.331267	2.05952	3.55362e-09	1.76009e-07	0.888473	0.871916	0.882013	0.880801	0.767633	0.747262	0.753019	0.755971	0.124829	1.25564	3.98467e-06	0.000172695	WTvsKO_0h	No
cg30610479_TC21	chr12	47404826	47404828	CG	Random	FALSE	+								0.710284	0.759811	0.707529	0.725875	0.310655	0.279719	0.391054	0.327143	0.398732	2.46105	2.5503e-10	3.87995e-08	0.863504	0.850192	0.864397	0.859365	0.784376	0.739027	0.75964	0.761014	0.0983504	0.937821	8.60282e-05	0.000686051	WTvsKO_0h	No
cg30614678_TC21	chr12	48460126	48460128	CG	PMDsoloWCGW	FALSE	-								0.491343	0.586733	0.530008	0.536028	0.171742	0.16873	0.238669	0.193047	0.342981	2.291	1.16109e-09	9.051e-08	0.720071	0.755258	0.772181	0.74917	0.635002	0.545823	0.600664	0.59383	0.15534	1.03228	0.00020303	0.00114823	WTvsKO_0h	No
cg30616039_BC11	chr12	48770956	48770958	CG	Random	FALSE	+								0.614427	0.746437	0.753242	0.704702	0.391186	0.338883	0.380357	0.370142	0.33456	2.04876	2.27136e-08	5.75414e-07	0.830042	0.869431	0.895064	0.864846	0.789463	0.756726	0.715059	0.753749	0.111097	1.08146	0.000846349	0.00290105	WTvsKO_0h	No
cg30616780_TC11	chr12	48959840	48959842	CG	Adenoma	FALSE	-								0.556021	0.661504	0.615414	0.61098	0.205254	0.153871	0.256051	0.205059	0.405921	2.64018	2.42782e-10	3.76823e-08	0.788034	0.823846	0.799755	0.803878	0.562345	0.516474	0.545103	0.541307	0.262571	1.8	4.39325e-07	0.000121972	WTvsKO_0h	No
cg30616790_TC21	chr12	48961693	48961695	CG	MonoallelicMeth	FALSE	-								0.552948	0.629228	0.592891	0.591689	0.185695	0.146066	0.269763	0.200508	0.391182	2.57631	6.11724e-10	6.29605e-08	0.768791	0.809636	0.746617	0.775015	0.53689	0.518526	0.573764	0.54306	0.231955	1.54397	6.29455e-06	0.000198057	WTvsKO_0h	No
cg30621888_TC21	chr12	49963756	49963758	CG	MonoallelicMeth	FALSE	+								0.52965	0.558885	0.531436	0.53999	0.090374	0.0926703	0.154639	0.112561	0.427429	3.25592	2.18817e-12	1.72686e-09	0.708731	0.711275	0.713951	0.711319	0.40876	0.408863	0.405862	0.407828	0.30349	1.83911	6.48269e-08	7.04099e-05	WTvsKO_0h	No
cg30622929_TC21	chr12	50192301	50192303	CG	Enhancer	FALSE	+								0.602735	0.662799	0.658011	0.641182	0.257725	0.215163	0.316978	0.263289	0.377893	2.34039	6.65918e-10	6.61375e-08	0.805707	0.813175	0.82809	0.815657	0.626163	0.603198	0.670391	0.633251	0.182406	1.35648	6.83342e-06	0.000203444	WTvsKO_0h	No
cg30622966_TC21	chr12	50198025	50198027	CG	VMR;chr12:50197863-50198031	FALSE	+								0.571395	0.620913	0.632143	0.608151	0.230899	0.208128	0.30775	0.248925	0.359225	2.24702	1.50172e-09	1.04803e-07	0.777815	0.750717	0.781049	0.769861	0.638209	0.573326	0.575338	0.595624	0.174236	1.18326	2.71499e-05	0.000368478	WTvsKO_0h	No
cg30623443_TC11	chr12	50304958	50304960	CG	Random	FALSE	-								0.661814	0.782305	0.711467	0.718528	0.319213	0.220605	0.33384	0.291219	0.427309	2.67546	3.96002e-10	4.97612e-08	0.87256	0.875357	0.870027	0.872648	0.782946	0.710358	0.660786	0.71803	0.154618	1.40775	7.3903e-05	0.000629751	WTvsKO_0h	No
cg30626027_TC21	chr12	50709308	50709310	CG	Enhancer	FALSE	-								0.457159	0.611626	0.503614	0.524133	0.1471	0.150346	0.284169	0.193871	0.330261	2.26509	6.02139e-08	1.1024e-06	0.806099	0.77764	0.77775	0.787163	0.583046	0.569257	0.560556	0.570953	0.21621	1.47727	1.20025e-06	0.000135434	WTvsKO_0h	No
cg30661902_TC11	chr12	54760316	54760318	CG	GeneBody;Snx6;NM_026998;inside_[intron_between_exon_9_and_10];splice=0	FALSE	+	Snx6	Snx6;Snx6;Snx6	protein_coding;protein_coding;protein_coding	ENSMUST00000005798.8;ENSMUST00000218934.1;ENSMUST00000219722.1	35387;35166;167			0.524593	0.648623	0.581701	0.584972	0.297444	0.25708	0.17562	0.243381	0.341591	2.16799	1.78395e-08	4.90115e-07	0.90571	0.895908	0.910591	0.90407	0.863399	0.801971	0.715866	0.793745	0.110324	1.23555	0.00169825	0.00467456	WTvsKO_0h	No
cg30667153_TC11	chr12	55376751	55376753	CG	Adenoma	FALSE	+	Prorp	Prorp;Prorp;Prorp;Prorp;Prorp	protein_coding;protein_coding;protein_coding;protein_coding;protein_coding	ENSMUST00000021411.14;ENSMUST00000183475.7;ENSMUST00000183654.1;ENSMUST00000184766.7;ENSMUST00000184980.7	74115;73491;73466;73509;77175			0.186667	0.25542	0.27555	0.239212	0.140699	0.119091	0.110373	0.123387	0.115825	1.14893	5.01859e-05	0.000158331	0.650307	0.625642	0.718934	0.664961	0.367808	0.275555	0.304252	0.315872	0.349089	2.12005	2.4571e-06	0.00015119	WTvsKO_96h	No
cg30667158_TC21	chr12	55377170	55377172	CG	Enhancer	FALSE	+	Prorp	Prorp;Prorp;Prorp;Prorp;Prorp	protein_coding;protein_coding;protein_coding;protein_coding;protein_coding	ENSMUST00000021411.14;ENSMUST00000183475.7;ENSMUST00000183654.1;ENSMUST00000184766.7;ENSMUST00000184980.7	74534;73910;73885;73928;77594			0.132652	0.193376	0.222989	0.183006	0.0824498	0.0911151	0.11395	0.0958383	0.0871674	1.06104	0.000229591	0.000538991	0.643511	0.557455	0.686835	0.629267	0.281424	0.248307	0.272058	0.267263	0.362004	2.2295	1.20209e-06	0.000135434	WTvsKO_96h	No
cg30682833_TC11	chr12	57142490	57142492	CG	Random	FALSE	+	Slc25a21	Slc25a21;Slc25a21;Slc25a21	protein_coding;protein_coding;protein_coding	ENSMUST00000044634.11;ENSMUST00000110680.2;ENSMUST00000217690.1	54982;16754;18153			0.597042	0.695461	0.652112	0.648205	0.296557	0.220687	0.292377	0.269874	0.378331	2.33551	8.04886e-10	7.35883e-08	0.829231	0.819765	0.814428	0.821141	0.686769	0.623641	0.626809	0.64574	0.175402	1.32985	7.94962e-06	0.000214995	WTvsKO_0h	No
cg30687740_BC21	chr12	57729341	57729343	CG	EPIC;cg27186318	FALSE	+	Ttc6	Ttc6	protein_coding	ENSMUST00000172939.7	153525			0.537017	0.648447	0.543197	0.576221	0.20937	0.184172	0.32978	0.241107	0.335113	2.14482	4.41476e-08	8.91621e-07	0.808517	0.818988	0.814627	0.814044	0.634981	0.594783	0.610146	0.613304	0.200741	1.4643	9.91212e-07	0.000131915	WTvsKO_0h	No
cg30702047_TC21	chr12	59978377	59978379	CG	PseudogeneTSS;chr12:59977225;Gm29809;ENSMUST00000218423;1153	FALSE	+	Gm29809	Gm29809	processed_pseudogene	ENSMUST00000218423.1	-1152			0.587037	0.663365	0.607618	0.61934	0.241519	0.194051	0.28848	0.24135	0.37799	2.37487	5.83227e-10	6.14378e-08	0.788849	0.845384	0.824016	0.819416	0.65228	0.617506	0.672889	0.647558	0.171858	1.31348	2.79479e-05	0.000374202	WTvsKO_0h	No
cg30703667_TC11	chr12	60364443	60364445	CG	Random	FALSE	-								0.752862	0.851502	0.812057	0.805474	0.45645	0.381297	0.514791	0.450846	0.354627	2.36761	2.81575e-09	1.52441e-07	0.878753	0.896549	0.894373	0.889892	0.831527	0.815649	0.744293	0.797156	0.0927353	1.02157	0.0006058	0.00232208	WTvsKO_0h	No
cg30703893_BC21	chr12	60424056	60424058	CG	PseudogeneTSS;chr12:60424136;Gm20049;ENSMUST00000219950;78	FALSE	+	Gm20049	Gm20049	processed_pseudogene	ENSMUST00000219950.1	80			0.501777	0.569212	0.528112	0.533034	0.150169	0.143166	0.179314	0.15755	0.375484	2.61697	2.29049e-11	9.6625e-09	0.774996	0.826239	0.817598	0.806277	0.577492	0.554041	0.580466	0.570666	0.235611	1.65521	1.67691e-06	0.000141264	WTvsKO_0h	No
cg30704154_TC21	chr12	60493145	60493147	CG	PMDsoloWCGW	FALSE	-								0.400711	0.523855	0.470968	0.465178	0.111692	0.103154	0.18042	0.131755	0.333423	2.56149	8.13584e-10	7.4043e-08	0.72402	0.747789	0.733522	0.73511	0.462831	0.447093	0.457916	0.455946	0.279164	1.72836	1.71285e-07	0.000103616	WTvsKO_0h	No
cg30706685_BC21	chr12	61132707	61132709	CG	Adenoma	FALSE	-								0.67659	0.753896	0.680546	0.703677	0.308367	0.268408	0.412927	0.3299	0.373777	2.29691	3.61017e-09	1.77698e-07	0.857388	0.873566	0.885114	0.872023	0.761095	0.706551	0.752142	0.739929	0.132093	1.26041	2.11209e-05	0.00032623	WTvsKO_0h	No
cg30707055_TC11	chr12	61219955	61219957	CG	Random	FALSE	-	Gm48301	Gm48301	lincRNA	ENSMUST00000220664.1	24830			0.589925	0.689899	0.620827	0.63355	0.305382	0.255531	0.307742	0.289552	0.343999	2.09584	3.37186e-09	1.70399e-07	0.823986	0.868651	0.86931	0.853982	0.697122	0.651432	0.69437	0.680975	0.173007	1.46575	1.26288e-05	0.000258777	WTvsKO_0h	No
cg30707135_BC21	chr12	61244729	61244731	CG	PMDsoloWCGW	FALSE	+								0.58707	0.641426	0.602814	0.610436	0.258566	0.194201	0.271264	0.241344	0.369093	2.31563	5.05799e-10	5.6605e-08	0.765646	0.78561	0.838897	0.796718	0.68178	0.678966	0.634263	0.665003	0.131715	0.995968	0.000488746	0.00201866	WTvsKO_0h	No
cg30707141_TC11	chr12	61247674	61247676	CG	Random	FALSE	-								0.688973	0.835614	0.814865	0.779818	0.43591	0.373724	0.537394	0.449009	0.330808	2.17722	9.24955e-08	1.47624e-06	0.881808	0.880909	0.890926	0.884548	0.879844	0.828152	0.811857	0.839951	0.0445967	0.521921	0.0253093	0.0370794	WTvsKO_0h	No
cg30708952_TC21	chr12	61672984	61672986	CG	PMDsoloWCGW	FALSE	+	Lrfn5	Lrfn5;Lrfn5	protein_coding;protein_coding	ENSMUST00000055815.13;ENSMUST00000119481.1	149037;149037			0.611566	0.747696	0.674652	0.677971	0.333025	0.293687	0.415835	0.347516	0.330456	2.01089	5.00496e-08	9.72688e-07	0.832612	0.827398	0.872498	0.844169	0.799212	0.731108	0.733433	0.754584	0.0895851	0.818028	0.00252039	0.00618048	WTvsKO_0h	No
cg30709111_TC11	chr12	61713301	61713303	CG	Random	FALSE	-	Lrfn5	Lrfn5;Lrfn5	protein_coding;protein_coding	ENSMUST00000055815.13;ENSMUST00000119481.1	189354;189354			0.650678	0.737411	0.706357	0.698148	0.29557	0.215762	0.467432	0.326255	0.371894	2.3188	8.33073e-08	1.37757e-06	0.859036	0.909057	0.867509	0.878534	0.800742	0.760886	0.720062	0.760564	0.11797	1.2	0.000433978	0.00186758	WTvsKO_0h	No
cg30709531_BC11	chr12	61838444	61838446	CG	PMDsoloWCGW	FALSE	+	Lrfn5	Lrfn5;Lrfn5	protein_coding;protein_coding	ENSMUST00000055815.13;ENSMUST00000119481.1	314497;314497			0.694362	0.77637	0.74025	0.736994	0.332916	0.224553	0.374362	0.310611	0.426383	2.67398	3.72473e-10	4.7873e-08	0.88735	0.906453	0.906584	0.900129	0.812916	0.763579	0.760523	0.779006	0.121123	1.35163	1.70396e-05	0.000294305	WTvsKO_0h	No
cg30709779_BC21	chr12	61890507	61890509	CG	PseudogeneTSS;chr12:61890604;Gm7753;ENSMUST00000221007;95	FALSE	+	Gm7753	Gm7753	processed_pseudogene	ENSMUST00000221007.1	97			0.545487	0.673565	0.582764	0.600605	0.232571	0.200193	0.294989	0.242584	0.358021	2.25597	3.98707e-09	1.88627e-07	0.815926	0.791167	0.798223	0.801772	0.677595	0.66648	0.626399	0.656824	0.144948	1.0793	2.94425e-05	0.000383379	WTvsKO_0h	No
cg30711406_TC11	chr12	62257437	62257439	CG	PseudogeneTSS;chr12:62257849;Gm48365;ENSMUST00000220734;410	FALSE	+	Gm48365	Gm48365	processed_pseudogene	ENSMUST00000220734.1	-411			0.711834	0.804722	0.755526	0.757361	0.357852	0.328625	0.495746	0.394074	0.363287	2.29139	8.25968e-09	2.98599e-07	0.896619	0.907823	0.917686	0.907376	0.800025	0.799238	0.775319	0.791527	0.115849	1.37166	4.64291e-06	0.000179427	WTvsKO_0h	No
cg30711931_TC11	chr12	62380906	62380908	CG	PMDsoloWCGW	FALSE	-								0.729232	0.818285	0.793306	0.780274	0.35391	0.277759	0.470452	0.367373	0.412901	2.65278	1.15056e-09	8.99308e-08	0.900899	0.914847	0.902956	0.906234	0.768361	0.720183	0.741892	0.743479	0.162756	1.73691	6.74208e-07	0.000127457	WTvsKO_0h	No
cg30712258_TC21	chr12	62463121	62463123	CG	PseudogeneTSS;chr12:62464279;Gm48367;ENSMUST00000223532;1156	FALSE	+								0.540537	0.613778	0.60432	0.586212	0.185776	0.14538	0.246093	0.192416	0.393796	2.60541	2.1667e-10	3.53518e-08	0.784699	0.775551	0.814595	0.791615	0.606823	0.564297	0.597856	0.589659	0.201956	1.40624	4.14925e-06	0.000174291	WTvsKO_0h	No
cg30716740_TC21	chr12	63557864	63557866	CG	PMDsoloWCGW	FALSE	-								0.555433	0.649707	0.610949	0.605363	0.168368	0.151144	0.239088	0.1862	0.419163	2.77588	5.75457e-11	1.72782e-08	0.785873	0.794677	0.81014	0.796897	0.508751	0.441836	0.571564	0.507384	0.289513	1.93079	2.66735e-06	0.000154728	WTvsKO_0h	No
cg30718274_TC21	chr12	63924571	63924573	CG	PMDsoloWCGW	FALSE	+								0.551457	0.711725	0.548233	0.603805	0.288275	0.234369	0.246562	0.256402	0.347403	2.16812	1.65407e-08	4.67058e-07	0.814018	0.790238	0.785206	0.796487	0.674501	0.673882	0.637687	0.662024	0.134464	0.999889	4.63043e-05	0.000485129	WTvsKO_0h	No
cg30718489_BC21	chr12	63978469	63978471	CG	PMDsoloWCGW	FALSE	+								0.638995	0.671427	0.662761	0.657728	0.290296	0.26391	0.342682	0.298963	0.358765	2.17959	8.19738e-10	7.4248e-08	0.846092	0.842081	0.852911	0.847028	0.721606	0.712621	0.720414	0.718214	0.128814	1.1198	5.87554e-06	0.000193647	WTvsKO_0h	No
cg30718495_BC21	chr12	63980884	63980886	CG	PMDsoloWCGW	FALSE	+								0.577383	0.673217	0.625567	0.625389	0.268985	0.227426	0.375276	0.290562	0.334827	2.05843	3.36543e-08	7.45636e-07	0.79033	0.811924	0.823882	0.808712	0.669435	0.646755	0.673922	0.663371	0.145341	1.10411	1.84545e-05	0.00030528	WTvsKO_0h	No
cg30718992_BC21	chr12	64099336	64099338	CG	PMDsoloWCGW	FALSE	-								0.681993	0.756014	0.712584	0.716864	0.34874	0.306672	0.437086	0.364166	0.352697	2.16172	4.89893e-09	2.14067e-07	0.887338	0.861812	0.861438	0.870196	0.844271	0.772146	0.787512	0.80131	0.068886	0.72169	0.00481264	0.00991246	WTvsKO_0h	No
cg30720686_BC11	chr12	64471673	64471675	CG	GeneBody;Fscb;NM_001163271;inside_[cds_in_exon_1];splice=0	FALSE	+	Fscb	Fscb	protein_coding	ENSMUST00000059833.7	3017			0.666481	0.765318	0.718629	0.716809	0.340751	0.271127	0.482958	0.364945	0.351864	2.17804	6.01298e-08	1.10136e-06	0.862092	0.882109	0.873971	0.872724	0.788035	0.735629	0.725671	0.749779	0.122945	1.18907	4.07663e-05	0.000453611	WTvsKO_0h	No
cg30720695_TC11	chr12	64473813	64473815	CG	Random	FALSE	-	Fscb	Fscb	protein_coding	ENSMUST00000059833.7	877			0.43665	0.550383	0.510746	0.49926	0.14697	0.122224	0.193897	0.154364	0.344896	2.47442	5.35649e-10	5.83251e-08	0.718379	0.757657	0.749071	0.741702	0.586658	0.535632	0.552738	0.558342	0.18336	1.18556	1.53585e-05	0.00028156	WTvsKO_0h	No
cg30720698_TC21	chr12	64474622	64474624	CG	TSS;chr12:64474689;Fscb;ENSMUST00000059833;+67;1	FALSE	+	Fscb	Fscb	protein_coding	ENSMUST00000059833.7	68			0.529658	0.622858	0.637901	0.596806	0.202541	0.197371	0.31979	0.239901	0.356905	2.26732	8.2352e-09	2.98477e-07	0.770505	0.787956	0.773061	0.777174	0.690778	0.623218	0.669794	0.661264	0.11591	0.834475	0.00029623	0.00145912	WTvsKO_0h	No
cg30722506_BC21	chr12	64832555	64832557	CG	Enhancer	FALSE	+								0.601954	0.669914	0.609746	0.627205	0.29303	0.226398	0.285407	0.268278	0.358926	2.20969	1.04501e-09	8.59517e-08	0.815966	0.836823	0.836583	0.829791	0.688633	0.62104	0.656966	0.655546	0.174244	1.35591	7.50888e-06	0.000210933	WTvsKO_0h	No
cg30723468_TC21	chr12	64963885	64963887	CG	TSS;chr12:64963369;Klhl28;ENSMUST00000021331;-516;2	FALSE	-	Klhl28	Klhl28;Klhl28;Klhl28	protein_coding;protein_coding;protein_coding	ENSMUST00000021331.8;ENSMUST00000221957.1;ENSMUST00000222508.1	-515;1628;1649		Shore	0.509153	0.625123	0.532924	0.555734	0.199733	0.176746	0.282078	0.219519	0.336215	2.18354	9.61603e-09	3.29309e-07	0.756327	0.805894	0.778802	0.780341	0.655196	0.571941	0.614551	0.613896	0.166445	1.16218	7.57805e-05	0.00063857	WTvsKO_0h	No
cg30725655_BC11	chr12	65226007	65226009	CG	CGI;chr12:65225693-65226020,TSS;chr12:65226067;Wdr20rt;ENSMUST00000222822;-60;2,ZygoteUnmeth	FALSE	-	Wdr20rt	Wdr20rt;Wdr20rt;Wdr20rt;Wdr20rt	protein_coding;protein_coding;protein_coding;protein_coding	ENSMUST00000046331.4;ENSMUST00000221658.1;ENSMUST00000221980.1;ENSMUST00000222822.1	491;484;287;-60	CGI:chr12:65225693-65226020	Island	0.242006	0.312695	0.268962	0.274554	0.148907	0.113135	0.104314	0.122119	0.152435	1.45391	1.63349e-06	1.15524e-05	0.791931	0.737703	0.800852	0.776829	0.495348	0.425914	0.345913	0.422392	0.354437	2.26816	3.6952e-06	0.000168958	WTvsKO_96h	No
cg30732212_TC21	chr12	66513345	66513347	CG	EPIC;cg19087284	TRUE	+	Mdga2	Mdga2;Mdga2;Mdga2;Mdga2;Mdga2;Mdga2;Mdga2	protein_coding;protein_coding;protein_coding;protein_coding;protein_coding;protein_coding;protein_coding	ENSMUST00000037181.15;ENSMUST00000101379.9;ENSMUST00000178814.8;ENSMUST00000222623.1;ENSMUST00000222987.1;ENSMUST00000223141.1;ENSMUST00000223289.1	709204;707857;707876;47638;47630;707697;141998			0.494433	0.586186	0.519198	0.533272	0.143871	0.128649	0.205984	0.159501	0.373771	2.6202	1.60927e-10	2.99197e-08	0.777144	0.805646	0.792848	0.79188	0.508099	0.498182	0.540253	0.515511	0.276368	1.84028	2.22375e-07	0.000108644	WTvsKO_0h	No
cg30734077_BC11	chr12	66886587	66886589	CG	Random	FALSE	+	Mdga2	Mdga2;Mdga2;Mdga2;Mdga2	protein_coding;protein_coding;protein_coding;protein_coding	ENSMUST00000037181.15;ENSMUST00000101379.9;ENSMUST00000178814.8;ENSMUST00000223141.1	335962;334615;334634;334455			0.484577	0.636165	0.579691	0.566811	0.19642	0.155127	0.220451	0.190666	0.376145	2.49363	6.41538e-10	6.49735e-08	0.775978	0.836328	0.815185	0.809164	0.653237	0.560163	0.572259	0.59522	0.213944	1.53474	2.51437e-05	0.000354501	WTvsKO_0h	No
cg30734917_BC21	chr12	67068164	67068166	CG	Adenoma	FALSE	-	Mdga2	Mdga2;Mdga2;Mdga2;Mdga2	protein_coding;protein_coding;protein_coding;protein_coding	ENSMUST00000037181.15;ENSMUST00000101379.9;ENSMUST00000178814.8;ENSMUST00000223141.1	154385;153038;153057;152878			0.528488	0.574005	0.59192	0.564804	0.212521	0.177952	0.285948	0.225473	0.339331	2.183	3.98889e-09	1.88627e-07	0.755615	0.791757	0.763183	0.770185	0.607498	0.583338	0.609972	0.600269	0.169916	1.16092	1.18893e-05	0.00025224	WTvsKO_0h	No
cg30737111_BC21	chr12	67509545	67509547	CG	PseudogeneTSS;chr12:67510756;Rpl17-ps3;ENSMUST00000221295;1209	FALSE	+	Rpl17-ps3	Rpl17-ps3	processed_pseudogene	ENSMUST00000221295.1	-1210			0.65345	0.707753	0.63447	0.665225	0.320445	0.268744	0.356899	0.315363	0.349862	2.12161	2.80109e-09	1.51962e-07	0.830308	0.834213	0.832615	0.832379	0.656944	0.65696	0.658127	0.657344	0.175035	1.37221	8.52248e-07	0.000129433	WTvsKO_0h	No
cg30741679_BC21	chr12	68531525	68531527	CG	lincRNATSS;chr12:68532231;Gm47489;ENSMUST00000222659;704	FALSE	+	Gm47489	Gm47489	lincRNA	ENSMUST00000222659.1	706			0.541581	0.60978	0.549974	0.567111	0.129227	0.119394	0.220945	0.156522	0.410589	2.87568	8.89795e-11	2.20523e-08	0.799448	0.819152	0.807182	0.808594	0.516585	0.491788	0.548098	0.518823	0.289771	1.97109	1.36836e-07	9.6868e-05	WTvsKO_0h	No
cg30763040_TC11	chr12	70650709	70650711	CG	lincRNATSS;chr12:70650182;Gm24474;ENSMUST00000220504;528	FALSE	+	Gm24474	Gm24474	lincRNA	ENSMUST00000220504.1	528			0.658203	0.824606	0.685049	0.72262	0.437306	0.354596	0.381304	0.391069	0.331551	2.0752	1.13974e-07	1.70666e-06	0.84907	0.862281	0.841637	0.850996	0.796761	0.740032	0.722393	0.753062	0.0979343	0.896148	0.000545398	0.00216726	WTvsKO_0h	No
cg30770717_BC11	chr12	71318614	71318616	CG	CGI;chr12:71317978-71318774	FALSE	-	4930474H06Rik;Dact1	4930474H06Rik;Dact1;Dact1	processed_transcript;protein_coding;protein_coding	ENSMUST00000132822.1;ENSMUST00000061273.11;ENSMUST00000150639.1	3046;8731;8631	CGI:chr12:71317978-71318774	Island	0.260356	0.508552	0.433609	0.400839	0.149932	0.109277	0.25543	0.171546	0.229293	1.74378	3.15498e-05	0.000109713	0.77784	0.707813	0.785342	0.756999	0.422386	0.429743	0.4239	0.425343	0.331656	2.08597	5.6226e-07	0.000123735	WTvsKO_96h	No
cg30776421_BC21	chr12	71889776	71889778	CG	TSS;chr12:71889729;Daam1;ENSMUST00000221317;+47;1	FALSE	+	Daam1	Daam1;Daam1;Daam1;Daam1;Daam1	protein_coding;protein_coding;protein_coding;protein_coding;protein_coding	ENSMUST00000085299.3;ENSMUST00000221317.1;ENSMUST00000221971.1;ENSMUST00000222327.1;ENSMUST00000223272.1	58614;47;58629;58661;58699			0.257842	0.374101	0.33834	0.323428	0.16313	0.102088	0.128252	0.131157	0.192271	1.67511	6.50982e-07	5.88547e-06	0.67161	0.57748	0.681212	0.643434	0.375074	0.332087	0.200145	0.302435	0.340999	2.10726	7.0972e-05	0.000614965	WTvsKO_96h	No
cg30785654_TC11	chr12	72764097	72764099	CG	Enhancer	FALSE	+	Ppm1a	Ppm1a;Ppm1a;Ppm1a;Ppm1a;Ppm1a	protein_coding;protein_coding;protein_coding;protein_coding;protein_coding	ENSMUST00000021514.9;ENSMUST00000221502.1;ENSMUST00000221628.1;ENSMUST00000222790.1;ENSMUST00000223410.1	2887;3297;6643;3357;2783		Shelf	0.536272	0.704198	0.680242	0.640237	0.268541	0.253875	0.336369	0.286262	0.353975	2.17712	1.78923e-08	4.90773e-07	0.820276	0.857336	0.873377	0.85033	0.78421	0.741192	0.688422	0.737941	0.112389	1.01346	0.00101111	0.00326917	WTvsKO_0h	No
cg30786449_BC11	chr12	72844782	72844784	CG	Enhancer	FALSE	-								0.111934	0.246006	0.270646	0.209529	0.122658	0.111601	0.0760013	0.10342	0.106109	1.13369	0.00122952	0.00219944	0.818273	0.752135	0.859018	0.809809	0.57014	0.548424	0.301814	0.473459	0.336349	2.30053	0.00030113	0.00147455	WTvsKO_96h	No
cg30826422_TC11	chr12	76857392	76857394	CG	Enhancer	FALSE	+	Fntb	Fntb;Fntb;Fntb;Fntb	protein_coding;protein_coding;protein_coding;protein_coding	ENSMUST00000041008.9;ENSMUST00000123887.1;ENSMUST00000125842.7;ENSMUST00000137826.7	19979;17098;91804;91795			0.363257	0.444274	0.454572	0.420701	0.1196	0.0782012	0.0898143	0.095872	0.324829	2.79492	2.81114e-11	1.09928e-08	0.840969	0.852065	0.909937	0.867657	0.547307	0.583914	0.45578	0.529	0.338657	2.58623	4.22267e-06	0.000175	WTvsKO_96h	No
cg30836726_BC21	chr12	78196867	78196869	CG	TSS;chr12:78197173;Gm6657;ENSMUST00000188791;-306;2	FALSE	+	Gm6657	Gm6657;Gm6657	protein_coding;protein_coding	ENSMUST00000188791.1;ENSMUST00000211288.2	-306;2626			0.548389	0.65573	0.633568	0.612562	0.32018	0.221645	0.294785	0.27887	0.333692	2.05216	1.46505e-08	4.32282e-07	0.776031	0.813733	0.804426	0.798063	0.660005	0.682879	0.654177	0.665687	0.132377	0.992348	5.26474e-05	0.00051967	WTvsKO_0h	No
cg30861329_TC21	chr12	80948337	80948339	CG	Enhancer	FALSE	-	Srsf5	Srsf5;Srsf5;Srsf5;Srsf5;Srsf5;Srsf5;Srsf5;Srsf5;Srsf5	protein_coding;protein_coding;protein_coding;protein_coding;protein_coding;protein_coding;protein_coding;protein_coding;protein_coding	ENSMUST00000094693.10;ENSMUST00000110351.7;ENSMUST00000110352.9;ENSMUST00000110354.7;ENSMUST00000110356.2;ENSMUST00000125814.8;ENSMUST00000133783.7;ENSMUST00000151036.1;ENSMUST00000153056.7	2834;2806;2806;2818;2753;2790;2818;1962;2806		Shelf	0.196361	0.261956	0.289772	0.249363	0.0640506	0.0657708	0.0780041	0.0692752	0.180088	2.14658	2.83842e-09	1.53255e-07	0.723605	0.695405	0.767528	0.728846	0.348423	0.369105	0.387477	0.368335	0.360511	2.21324	2.12105e-07	0.000108644	WTvsKO_96h	No
cg30861345_TC11	chr12	80949148	80949150	CG	Random	FALSE	-	Srsf5	Srsf5;Srsf5;Srsf5;Srsf5;Srsf5;Srsf5;Srsf5;Srsf5	protein_coding;protein_coding;protein_coding;protein_coding;protein_coding;protein_coding;protein_coding;protein_coding	ENSMUST00000094693.10;ENSMUST00000110351.7;ENSMUST00000110352.9;ENSMUST00000110354.7;ENSMUST00000110356.2;ENSMUST00000133783.7;ENSMUST00000151036.1;ENSMUST00000153056.7	3645;3617;3617;3629;3564;3629;2773;3617		Shelf	0.546804	0.595291	0.6163	0.586132	0.241596	0.24213	0.254565	0.246097	0.340035	2.11928	8.68102e-10	7.69215e-08	0.876814	0.851944	0.889099	0.872619	0.645549	0.644418	0.673993	0.654653	0.217966	1.86284	6.31805e-07	0.000126954	WTvsKO_0h	No
cg30881570_BC11	chr12	83087935	83087937	CG	Random	FALSE	+	Gm29530;Rgs6	Gm29530;Rgs6;Rgs6;Rgs6;Rgs6;Rgs6;Rgs6;Rgs6;Rgs6;Rgs6;Rgs6;Rgs6;Rgs6;Rgs6;Rgs6	antisense;protein_coding;protein_coding;protein_coding;protein_coding;protein_coding;protein_coding;protein_coding;protein_coding;protein_coding;protein_coding;protein_coding;protein_coding;protein_coding;protein_coding	ENSMUST00000187556.1;ENSMUST00000101234.8;ENSMUST00000161801.7;ENSMUST00000185665.6;ENSMUST00000185674.6;ENSMUST00000186081.6;ENSMUST00000186309.6;ENSMUST00000186323.6;ENSMUST00000186458.6;ENSMUST00000186848.4;ENSMUST00000191107.6;ENSMUST00000191311.6;ENSMUST00000191352.6;ENSMUST00000200911.3;ENSMUST00000202210.3	10939;436107;471011;470991;436107;470364;470282;436107;470437;471300;436107;436107;436107;470898;470437			0.595497	0.6469	0.63148	0.624626	0.324019	0.232677	0.198246	0.251647	0.372978	2.33556	1.49814e-09	1.04665e-07	0.830049	0.82433	0.843436	0.832605	0.684626	0.608988	0.333859	0.542491	0.290114	2.06237	0.00106834	0.00339399	WTvsKO_0h	No
cg30894595_TC11	chr12	84202305	84202307	CG	Enhancer	FALSE	-	Elmsan1	Elmsan1;Elmsan1	protein_coding;protein_coding	ENSMUST00000046266.12;ENSMUST00000220974.1	16576;16576			0.141212	0.323967	0.292295	0.252491	0.164786	0.155648	0.111396	0.143943	0.108548	0.945182	0.00462153	0.00697943	0.706726	0.696537	0.797091	0.733451	0.465852	0.446538	0.292777	0.401722	0.331729	2.07364	6.52591e-05	0.000586461	WTvsKO_96h	No
cg30907798_TC21	chr12	85272891	85272893	CG	Enhancer	FALSE	-	Acyp1;Zc2hc1c	Acyp1;Acyp1;Acyp1;Zc2hc1c;Zc2hc1c	protein_coding;protein_coding;protein_coding;protein_coding;protein_coding	ENSMUST00000008966.12;ENSMUST00000117138.2;ENSMUST00000121930.1;ENSMUST00000239335.1;ENSMUST00000239352.1	7544;7415;15547;-1394;-1447		Shelf	0.170415	0.299171	0.310516	0.260034	0.0921107	0.0878488	0.087333	0.0890975	0.170937	1.80016	4.05631e-07	4.19876e-06	0.806027	0.784777	0.842591	0.811132	0.503751	0.524581	0.405438	0.477923	0.333208	2.24349	1.92847e-06	0.000143673	WTvsKO_96h	No
cg30930634_BC21	chr12	87158475	87158477	CG	GeneBody;Gstz1;NM_001252556;inside_[5-UTR;intron_between_exon_2_and_3];splice=0	FALSE	-	Gstz1	Gstz1;Gstz1;Gstz1;Gstz1	protein_coding;protein_coding;protein_coding;protein_coding	ENSMUST00000063117.9;ENSMUST00000220574.1;ENSMUST00000222222.1;ENSMUST00000222885.1	10758;10704;868;11311			0.620898	0.658195	0.606251	0.628448	0.305964	0.249178	0.296023	0.283722	0.344726	2.10084	1.43073e-09	1.02221e-07	0.845267	0.828834	0.849622	0.841241	0.717328	0.663563	0.671405	0.684099	0.157142	1.28976	8.95847e-06	0.00022554	WTvsKO_0h	No
cg30942958_BC21	chr12	89074871	89074873	CG	Enhancer	FALSE	+	Nrxn3	Nrxn3;Nrxn3;Nrxn3;Nrxn3;Nrxn3;Nrxn3	protein_coding;protein_coding;protein_coding;protein_coding;protein_coding;protein_coding	ENSMUST00000057634.13;ENSMUST00000163134.7;ENSMUST00000167103.7;ENSMUST00000167734.7;ENSMUST00000170533.1;ENSMUST00000190626.6	121473;280368;351763;351996;121482;351886			0.674009	0.722865	0.66215	0.686341	0.339406	0.316831	0.391745	0.349327	0.337014	2.0353	3.63164e-09	1.7818e-07	0.858983	0.873525	0.831023	0.85451	0.714393	0.697044	0.717527	0.709655	0.144855	1.27435	1.4636e-05	0.000275718	WTvsKO_0h	No
cg30947324_TC11	chr12	89901717	89901719	CG	MonoallelicMeth	FALSE	+	Nrxn3	Nrxn3;Nrxn3;Nrxn3;Nrxn3;Nrxn3;Nrxn3;Nrxn3;Nrxn3	protein_coding;protein_coding;protein_coding;protein_coding;protein_coding;protein_coding;protein_coding;protein_coding	ENSMUST00000057634.13;ENSMUST00000110130.3;ENSMUST00000110133.8;ENSMUST00000163134.7;ENSMUST00000167103.7;ENSMUST00000167887.7;ENSMUST00000190626.6;ENSMUST00000238943.1	948319;89235;89235;1107214;1178609;708612;1178732;89310			0.477958	0.56266	0.531923	0.52418	0.115957	0.107097	0.146668	0.123241	0.40094	2.98379	3.25506e-12	2.30979e-09	0.701678	0.754475	0.716503	0.724219	0.490069	0.47838	0.458531	0.47566	0.248559	1.53773	1.80063e-06	0.000141929	WTvsKO_0h	No
cg30947631_BC11	chr12	89963785	89963787	CG	Random	FALSE	-	Nrxn3	Nrxn3;Nrxn3;Nrxn3;Nrxn3;Nrxn3;Nrxn3;Nrxn3;Nrxn3	protein_coding;protein_coding;protein_coding;protein_coding;protein_coding;protein_coding;protein_coding;protein_coding	ENSMUST00000057634.13;ENSMUST00000110130.3;ENSMUST00000110133.8;ENSMUST00000163134.7;ENSMUST00000167103.7;ENSMUST00000167887.7;ENSMUST00000190626.6;ENSMUST00000238943.1	1010387;151303;151303;1169282;1240677;770680;1240800;151378			0.766302	0.822234	0.78654	0.791692	0.468973	0.381742	0.506747	0.452488	0.339205	2.21345	2.25047e-09	1.33426e-07	0.91565	0.938034	0.928492	0.927392	0.890469	0.854087	0.865337	0.869964	0.0574278	0.934245	0.000451339	0.00191634	WTvsKO_0h	No
cg30949129_TC21	chr12	90254265	90254267	CG	Random	FALSE	-	Nrxn3	Nrxn3;Nrxn3;Nrxn3;Nrxn3;Nrxn3;Nrxn3;Nrxn3;Nrxn3	protein_coding;protein_coding;protein_coding;protein_coding;protein_coding;protein_coding;protein_coding;protein_coding	ENSMUST00000057634.13;ENSMUST00000110130.3;ENSMUST00000110133.8;ENSMUST00000163134.7;ENSMUST00000167103.7;ENSMUST00000167887.7;ENSMUST00000190626.6;ENSMUST00000238943.1	1300867;441783;441783;1459762;1531157;1061160;1531280;441858			0.687659	0.759562	0.654812	0.700678	0.377464	0.282084	0.405614	0.355054	0.345624	2.11419	1.45167e-08	4.29515e-07	0.806794	0.825161	0.83078	0.820912	0.733977	0.714622	0.758995	0.735865	0.0850471	0.717587	0.00063485	0.00239373	WTvsKO_0h	No
cg30950319_BC21	chr12	90492815	90492817	CG	Random	FALSE	+								0.633846	0.735045	0.632099	0.666997	0.317504	0.268334	0.410068	0.331968	0.335029	2.04017	4.21825e-08	8.66716e-07	0.842499	0.850863	0.857502	0.850288	0.705139	0.685701	0.722341	0.704394	0.145894	1.25271	4.60843e-06	0.000179006	WTvsKO_0h	No
cg30950476_BC11	chr12	90527477	90527479	CG	Random	FALSE	-								0.633435	0.775209	0.695888	0.701511	0.324207	0.320238	0.442693	0.362379	0.339131	2.08236	4.71926e-08	9.33414e-07	0.840591	0.859089	0.817567	0.839082	0.714843	0.697708	0.694288	0.70228	0.136802	1.15158	2.4481e-05	0.000350152	WTvsKO_0h	No
cg30960992_TC11	chr12	91791867	91791869	CG	miRNA;chr12:91791674;Gm22015;ENSMUST00000103908;194;2	FALSE	-	Gm22015	Gm22015	miRNA	ENSMUST00000103908.1	-193			0.399819	0.592207	0.549971	0.513999	0.183314	0.141813	0.216185	0.180437	0.333562	2.28419	1.41542e-08	4.22247e-07	0.698749	0.759717	0.76795	0.742139	0.576239	0.529612	0.462792	0.522881	0.219258	1.40058	6.24084e-05	0.000572069	WTvsKO_0h	No
cg30961698_TC11	chr12	91847914	91847916	CG	Enhancer	FALSE	-	Sel1l	Sel1l;Sel1l;Sel1l;Sel1l;Sel1l;Sel1l;Sel1l	protein_coding;protein_coding;protein_coding;protein_coding;protein_coding;protein_coding;protein_coding	ENSMUST00000021347.11;ENSMUST00000166691.7;ENSMUST00000167466.1;ENSMUST00000167594.7;ENSMUST00000169843.1;ENSMUST00000172246.7;ENSMUST00000178462.7	1243;1216;1215;1216;1226;1225;1243		Shore	0.698228	0.793551	0.770216	0.753999	0.360381	0.273109	0.372087	0.335192	0.418806	2.63088	1.73241e-10	3.10952e-08	0.86251	0.905423	0.893818	0.88725	0.800995	0.773495	0.826225	0.800239	0.0870116	0.98384	0.00055375	0.00218988	WTvsKO_0h	No
cg30964174_TC11	chr12	92219365	92219367	CG	PseudogeneTSS;chr12:92219377;Gm6841;ENSMUST00000220602;10	FALSE	-	Gm6841	Gm6841	processed_pseudogene	ENSMUST00000220602.1	-11			0.686118	0.785376	0.708642	0.726712	0.403967	0.338417	0.444946	0.395777	0.330935	2.04312	1.58883e-08	4.55029e-07	0.839622	0.882726	0.854756	0.859035	0.787245	0.742772	0.723803	0.751273	0.107761	1.01666	0.000339109	0.00159244	WTvsKO_0h	No
cg30965320_BC21	chr12	92450811	92450813	CG	PMDsoloWCGW	FALSE	+								0.551109	0.594495	0.544758	0.563454	0.16985	0.146927	0.253533	0.190103	0.373351	2.49716	5.19564e-10	5.73384e-08	0.789127	0.794098	0.792238	0.791821	0.553837	0.518106	0.581433	0.551125	0.240696	1.63056	7.10641e-07	0.000127457	WTvsKO_0h	No
cg30965876_TC21	chr12	92582782	92582784	CG	PMDsoloWCGW	FALSE	+								0.514364	0.62331	0.55656	0.564745	0.212342	0.183306	0.30799	0.234546	0.330199	2.11731	2.10631e-08	5.47115e-07	0.785466	0.793489	0.791843	0.790266	0.61888	0.63282	0.648176	0.633292	0.156974	1.12521	6.821e-06	0.000203244	WTvsKO_0h	No
cg30966158_BC21	chr12	92646951	92646953	CG	Adenoma	FALSE	-								0.534629	0.610151	0.591757	0.578845	0.209497	0.18096	0.265423	0.218627	0.360218	2.3149	7.75512e-10	7.22978e-08	0.824838	0.795079	0.827557	0.815825	0.695927	0.684876	0.660948	0.680584	0.135241	1.0589	3.41306e-05	0.000413099	WTvsKO_0h	No
cg30966352_BC21	chr12	92684746	92684748	CG	PMDsoloWCGW	FALSE	+								0.571669	0.699174	0.631573	0.634139	0.257663	0.214783	0.370267	0.280904	0.353234	2.19124	2.76081e-08	6.53298e-07	0.812562	0.833446	0.835156	0.827055	0.682119	0.663002	0.729098	0.691407	0.135648	1.09132	5.47209e-05	0.000531244	WTvsKO_0h	No
cg30966747_TC21	chr12	92766993	92766995	CG	PMDsoloWCGW	FALSE	+								0.526131	0.63944	0.567148	0.577573	0.179759	0.145247	0.277433	0.200813	0.37676	2.49844	2.69892e-09	1.48642e-07	0.774562	0.778066	0.797059	0.783229	0.581643	0.548832	0.580511	0.570329	0.2129	1.44575	1.32927e-06	0.000137112	WTvsKO_0h	No
cg30967650_TC11	chr12	92932833	92932835	CG	Random	FALSE	+								0.642335	0.758015	0.767867	0.722739	0.307982	0.326348	0.406084	0.346805	0.375934	2.32666	3.31185e-09	1.6855e-07	0.859588	0.861618	0.859321	0.860176	0.765669	0.743799	0.64968	0.719716	0.14046	1.2421	0.000154748	0.00097183	WTvsKO_0h	No
cg30967702_BC21	chr12	92946569	92946571	CG	PMDsoloWCGW	FALSE	-								0.478645	0.577669	0.481597	0.512637	0.150193	0.113783	0.229157	0.164377	0.34826	2.47804	3.16728e-09	1.63963e-07	0.763075	0.785549	0.792032	0.780219	0.540013	0.488097	0.606819	0.544976	0.235242	1.56696	1.15707e-05	0.000249255	WTvsKO_0h	No
cg30968254_TC21	chr12	93084498	93084500	CG	PMDsoloWCGW	FALSE	-								0.554793	0.654262	0.556823	0.588626	0.224318	0.210794	0.306319	0.247144	0.341482	2.14691	7.23991e-09	2.75124e-07	0.839126	0.818686	0.83912	0.832311	0.676265	0.654764	0.663327	0.664785	0.167525	1.32538	2.4734e-06	0.000151446	WTvsKO_0h	No
cg30969231_TC11	chr12	93279345	93279347	CG	Random	FALSE	-								0.576859	0.766684	0.704505	0.682683	0.17158	0.174053	0.333111	0.226248	0.456435	2.97878	2.17844e-09	1.30726e-07	0.87014	0.843025	0.795815	0.836327	0.711923	0.617961	0.699219	0.676368	0.159959	1.30526	0.000264457	0.00135667	WTvsKO_0h	No
cg30969384_BC21	chr12	93314793	93314795	CG	Adenoma	FALSE	+								0.648249	0.704422	0.676116	0.676262	0.344071	0.284332	0.367947	0.332117	0.344146	2.07993	2.70108e-09	1.48667e-07	0.853233	0.846914	0.850411	0.850186	0.76036	0.76552	0.764617	0.763499	0.0866873	0.813978	6.90217e-05	0.000605225	WTvsKO_0h	No
cg30969615_BC11	chr12	93369324	93369326	CG	Random	FALSE	-								0.603649	0.726982	0.601233	0.643955	0.288024	0.180062	0.33967	0.269252	0.374703	2.35465	2.11079e-08	5.47788e-07	0.836468	0.8695	0.858355	0.854774	0.664544	0.628655	0.709055	0.667418	0.187356	1.55309	6.95938e-06	0.000204918	WTvsKO_0h	No
cg30970294_BC11	chr12	93525142	93525144	CG	PMDsoloWCGW	FALSE	+								0.477349	0.635766	0.58855	0.567222	0.120817	0.144168	0.226825	0.163937	0.403285	2.79714	5.71022e-10	6.07429e-08	0.754434	0.813603	0.809319	0.792452	0.524668	0.472756	0.495388	0.497604	0.294848	1.95743	8.71083e-07	0.000129729	WTvsKO_0h	No
cg30970336_BC21	chr12	93536382	93536384	CG	PMDsoloWCGW	FALSE	+								0.495657	0.539888	0.521915	0.519153	0.149665	0.164409	0.17326	0.162445	0.356709	2.47949	3.56694e-11	1.29052e-08	0.716187	0.748401	0.760088	0.741558	0.56583	0.548538	0.506917	0.540428	0.20113	1.28958	1.09011e-05	0.000244197	WTvsKO_0h	No
cg30971167_BC21	chr12	93705797	93705799	CG	Adenoma	FALSE	+								0.492498	0.564769	0.501437	0.519568	0.14167	0.136845	0.185454	0.154657	0.364911	2.57729	5.87417e-11	1.74917e-08	0.75577	0.749111	0.739584	0.748155	0.544353	0.515744	0.628229	0.562775	0.18538	1.20312	7.64724e-05	0.000641968	WTvsKO_0h	No
cg30971168_TC21	chr12	93706146	93706148	CG	Random	FALSE	-								0.4232	0.552161	0.472136	0.482499	0.128051	0.122187	0.20722	0.152486	0.330013	2.41418	2.61286e-09	1.4547e-07	0.761564	0.805602	0.808203	0.79179	0.532068	0.531234	0.578781	0.547361	0.244428	1.6591	1.96282e-06	0.000144108	WTvsKO_0h	No
cg30971400_TC11	chr12	93759972	93759974	CG	Random	FALSE	-								0.648846	0.749361	0.725187	0.707798	0.259819	0.218518	0.287478	0.255272	0.452526	2.84134	1.84222e-11	8.28265e-09	0.845795	0.856786	0.860528	0.85437	0.67739	0.630259	0.711483	0.673044	0.181326	1.50656	4.85581e-06	0.000181553	WTvsKO_0h	No
cg30971537_BC21	chr12	93798058	93798060	CG	PMDsoloWCGW	FALSE	-								0.509278	0.560191	0.584731	0.5514	0.156437	0.15593	0.196012	0.16946	0.381941	2.59998	3.42554e-11	1.26208e-08	0.713754	0.72214	0.802049	0.745981	0.623585	0.581376	0.566779	0.59058	0.155401	1.04163	0.000533256	0.00213571	WTvsKO_0h	No
cg30971615_TC21	chr12	93821109	93821111	CG	PMDsoloWCGW	FALSE	+								0.689653	0.712936	0.691715	0.698101	0.333564	0.280151	0.413089	0.342268	0.355833	2.16566	2.90713e-09	1.55551e-07	0.866617	0.838506	0.846531	0.850551	0.763769	0.741576	0.777059	0.760801	0.08975	0.841541	0.000232509	0.00125118	WTvsKO_0h	No
cg30973585_TC21	chr12	94247068	94247070	CG	Adenoma	FALSE	+								0.441267	0.606592	0.573443	0.540434	0.144619	0.121882	0.211323	0.159275	0.381159	2.67478	8.82333e-10	7.75773e-08	0.763078	0.815426	0.815735	0.79808	0.637788	0.573315	0.66042	0.623841	0.174239	1.25835	7.79068e-05	0.000648968	WTvsKO_0h	No
cg30975160_BC11	chr12	94574200	94574202	CG	Random	FALSE	+								0.739437	0.800977	0.751815	0.764076	0.418206	0.369548	0.511997	0.43325	0.330826	2.09675	9.39118e-09	3.24191e-07	0.905775	0.903651	0.916505	0.908644	0.861193	0.844834	0.836109	0.847378	0.0612654	0.840575	0.000167565	0.0010194	WTvsKO_0h	No
cg30976069_TC11	chr12	94768339	94768341	CG	Random	FALSE	-								0.658682	0.773142	0.717189	0.716338	0.269213	0.238485	0.29047	0.266056	0.450282	2.82136	2.23972e-11	9.54419e-09	0.862904	0.907905	0.901924	0.890911	0.74113	0.700634	0.7359	0.725888	0.165023	1.64457	9.03878e-06	0.000226399	WTvsKO_0h	No
cg30981021_TC21	chr12	95772606	95772608	CG	Adenoma,GeneBody;Flrt2;NM_201518;inside_[5-UTR;intron_between_exon_1_and_2];splice=0	FALSE	-	Flrt2	Flrt2;Flrt2	protein_coding;protein_coding	ENSMUST00000057324.3;ENSMUST00000110117.1	80381;77250			0.636887	0.689176	0.67576	0.667274	0.316144	0.26612	0.386093	0.322786	0.344489	2.08816	5.45527e-09	2.29953e-07	0.811651	0.820946	0.852267	0.828288	0.70495	0.667564	0.680238	0.684251	0.144037	1.16041	2.99829e-05	0.000386728	WTvsKO_0h	No
cg30982393_BC21	chr12	96047108	96047110	CG	PseudogeneTSS;chr12:96047120;1700019M22Rik;ENSMUST00000073560;10	FALSE	+	1700019M22Rik	1700019M22Rik	processed_pseudogene	ENSMUST00000073560.4	12			0.708392	0.759558	0.710412	0.726121	0.409403	0.325226	0.399485	0.378038	0.348083	2.13477	1.93849e-09	1.21782e-07	0.852253	0.872711	0.854305	0.859756	0.75516	0.74612	0.755506	0.752262	0.107494	1.0165	2.36153e-05	0.000343819	WTvsKO_0h	No
cg30983005_BC11	chr12	96184178	96184180	CG	Adenoma,PMDsoloWCGW	FALSE	-								0.441835	0.621718	0.524706	0.52942	0.12613	0.103977	0.21389	0.147999	0.38142	2.76664	1.82158e-09	1.17622e-07	0.793379	0.808389	0.808841	0.803536	0.574121	0.537427	0.509732	0.540427	0.263109	1.7985	3.77545e-07	0.000118874	WTvsKO_0h	No
cg30983155_TC11	chr12	96219359	96219361	CG	PMDsoloWCGW	FALSE	+								0.668283	0.79745	0.751806	0.73918	0.374451	0.300355	0.434744	0.36985	0.36933	2.30852	6.79335e-09	2.64582e-07	0.929264	0.916775	0.910303	0.91878	0.826187	0.810675	0.820421	0.819094	0.0996861	1.3271	5.20349e-06	0.000186355	WTvsKO_0h	No
cg30983197_BC21	chr12	96227597	96227599	CG	PMDsoloWCGW	FALSE	+								0.553303	0.65058	0.613749	0.605878	0.171123	0.136206	0.272203	0.193177	0.4127	2.74451	5.33888e-10	5.82002e-08	0.84005	0.808045	0.838599	0.828898	0.598377	0.607976	0.684052	0.630135	0.198763	1.50705	1.16007e-05	0.000249508	WTvsKO_0h	No
cg30983262_BC21	chr12	96244017	96244019	CG	PMDsoloWCGW	FALSE	+								0.631028	0.740805	0.68564	0.685824	0.284847	0.264551	0.387477	0.312292	0.373532	2.29269	3.6414e-09	1.78429e-07	0.889252	0.864889	0.861914	0.872019	0.733186	0.723287	0.743537	0.733337	0.138682	1.31516	6.25989e-06	0.000197954	WTvsKO_0h	No
cg30983332_TC11	chr12	96257615	96257617	CG	Random	FALSE	-	Gm26480	Gm26480	misc_RNA	ENSMUST00000122619.1	-1378			0.537101	0.661471	0.641438	0.613337	0.201964	0.151109	0.221611	0.191561	0.421775	2.76826	7.37086e-11	1.98701e-08	0.808806	0.843063	0.819882	0.823917	0.613834	0.556139	0.660058	0.61001	0.213906	1.58047	9.64909e-06	0.000232124	WTvsKO_0h	No
cg30983793_BC11	chr12	96361242	96361244	CG	Adenoma	FALSE	-								0.488282	0.677994	0.606061	0.590779	0.159207	0.155146	0.254337	0.189563	0.401216	2.67525	1.67602e-09	1.12345e-07	0.868057	0.87134	0.892494	0.877297	0.71747	0.617929	0.661893	0.665764	0.211533	1.84125	3.14186e-06	0.000161845	WTvsKO_0h	No
cg30984009_TC11	chr12	96423891	96423893	CG	Random	FALSE	-								0.623151	0.719697	0.684473	0.675774	0.272601	0.232548	0.327544	0.277564	0.398209	2.45983	3.65861e-10	4.73587e-08	0.836675	0.886195	0.889858	0.870909	0.636837	0.623381	0.692604	0.65094	0.219969	1.87432	5.98562e-06	0.0001945	WTvsKO_0h	No
cg30984412_TC21	chr12	96525092	96525094	CG	PMDsoloWCGW	FALSE	-								0.568929	0.694806	0.644058	0.635931	0.211331	0.168075	0.371645	0.25035	0.385581	2.46923	2.78522e-08	6.57526e-07	0.806853	0.831327	0.805207	0.814462	0.595981	0.622666	0.675345	0.631331	0.183132	1.35701	1.30787e-05	0.000262415	WTvsKO_0h	No
cg30984481_TC21	chr12	96538995	96538997	CG	PMDsoloWCGW	FALSE	-								0.564156	0.65273	0.572457	0.596448	0.225239	0.185538	0.300707	0.237161	0.359286	2.27926	3.2925e-09	1.6785e-07	0.774412	0.784013	0.792417	0.783614	0.599802	0.623243	0.6433	0.622115	0.161499	1.13707	1.04862e-05	0.000240344	WTvsKO_0h	No
cg30984712_TC21	chr12	96604505	96604507	CG	PMDsoloWCGW	FALSE	+								0.508271	0.657302	0.556673	0.574082	0.17107	0.157501	0.282957	0.203842	0.37024	2.45109	6.44731e-09	2.55951e-07	0.835025	0.835301	0.837906	0.836077	0.60255	0.593739	0.649401	0.61523	0.220847	1.67166	5.59727e-07	0.000123618	WTvsKO_0h	No
cg30984913_TC21	chr12	96653690	96653692	CG	PMDsoloWCGW	FALSE	-								0.556451	0.655624	0.583753	0.59861	0.231866	0.210405	0.340493	0.260921	0.337688	2.11125	1.99444e-08	5.2662e-07	0.784953	0.82935	0.814187	0.809496	0.617863	0.637367	0.673091	0.642773	0.166723	1.24389	2.15829e-05	0.000329432	WTvsKO_0h	No
cg30984914_BC21	chr12	96653992	96653994	CG	Adenoma	FALSE	-								0.478701	0.557728	0.520025	0.518818	0.129971	0.106228	0.173445	0.136548	0.38227	2.79851	3.12976e-11	1.17633e-08	0.73388	0.792493	0.782902	0.769758	0.459578	0.433383	0.490681	0.461214	0.308544	1.97383	6.29089e-07	0.000126888	WTvsKO_0h	No
cg30985069_TC21	chr12	96696512	96696514	CG	PMDsoloWCGW	FALSE	-								0.467328	0.547255	0.490388	0.501657	0.157576	0.126715	0.22611	0.170134	0.331523	2.3359	2.4221e-09	1.38963e-07	0.716832	0.724346	0.740367	0.727182	0.521168	0.472523	0.530594	0.508095	0.219087	1.36843	3.79521e-06	0.000170603	WTvsKO_0h	No
cg30985138_BC21	chr12	96708988	96708990	CG	PMDsoloWCGW	FALSE	-								0.561629	0.601497	0.645761	0.602963	0.233476	0.246535	0.334468	0.271493	0.33147	2.04572	1.03573e-08	3.45081e-07	0.805364	0.76222	0.780221	0.782602	0.583307	0.648578	0.589838	0.607241	0.175361	1.22127	2.98442e-05	0.000386001	WTvsKO_0h	No
cg30986071_TC21	chr12	96898484	96898486	CG	PMDsoloWCGW	FALSE	+								0.498644	0.605147	0.564054	0.555949	0.135656	0.145452	0.214757	0.165288	0.39066	2.69218	1.26049e-10	2.68349e-08	0.722928	0.81538	0.752126	0.763478	0.498282	0.486817	0.474587	0.486562	0.276916	1.78689	5.459e-06	0.000189184	WTvsKO_0h	No
cg30986561_BC21	chr12	96995113	96995115	CG	Adenoma	FALSE	-								0.671024	0.726855	0.666624	0.688167	0.290471	0.251886	0.406036	0.316131	0.372037	2.28261	4.14327e-09	1.93164e-07	0.86482	0.84121	0.844695	0.850242	0.784385	0.720886	0.756955	0.754075	0.0961666	0.885064	0.000354968	0.00163903	WTvsKO_0h	No
cg30987016_BC11	chr12	97100139	97100141	CG	Random	FALSE	-	Gm47397	Gm47397	lincRNA	ENSMUST00000217786.1	2325			0.43389	0.616576	0.540327	0.530264	0.143013	0.0998835	0.211378	0.151425	0.37884	2.72975	2.43934e-09	1.39589e-07	0.774348	0.816929	0.830692	0.807323	0.597898	0.539716	0.595622	0.577745	0.229578	1.62355	5.01595e-06	0.000183459	WTvsKO_0h	No
cg30987022_TC11	chr12	97103065	97103067	CG	lincRNATSS;chr12:97102464;Gm47397;ENSMUST00000217786;602	FALSE	+	Gm47397	Gm47397	lincRNA	ENSMUST00000217786.1	-601			0.638709	0.745623	0.693911	0.692748	0.31047	0.296232	0.461171	0.355958	0.33679	2.05944	6.494e-08	1.16149e-06	0.797954	0.862664	0.832729	0.831116	0.77006	0.752551	0.749507	0.757372	0.0737435	0.672947	0.00402631	0.00867412	WTvsKO_0h	No
cg30990368_TC11	chr12	97762157	97762159	CG	Random	FALSE	+								0.672466	0.781107	0.696947	0.71684	0.286617	0.250185	0.400392	0.312398	0.404442	2.51877	1.7916e-09	1.16273e-07	0.878139	0.880263	0.868876	0.87576	0.776168	0.72471	0.729888	0.743589	0.132171	1.277	1.0289e-05	0.000238716	WTvsKO_0h	No
cg30991810_TC21	chr12	97974175	97974177	CG	Random	FALSE	-								0.72554	0.798061	0.731868	0.751823	0.358292	0.300781	0.368195	0.342422	0.409401	2.55684	9.21121e-11	2.24425e-08	0.8325	0.861356	0.862725	0.852194	0.690571	0.626869	0.627204	0.648215	0.203979	1.64771	3.07699e-06	0.000160896	WTvsKO_0h	No
cg30995525_TC21	chr12	98426953	98426955	CG	Enhancer	FALSE	+								0.595527	0.640194	0.588341	0.608021	0.297605	0.249177	0.242891	0.263224	0.344796	2.125	1.1776e-09	9.13065e-08	0.83303	0.831128	0.830901	0.831686	0.695659	0.6042	0.557662	0.619173	0.212513	1.59251	2.39636e-05	0.000346156	WTvsKO_0h	No
cg30997259_TC21	chr12	98602397	98602399	CG	Enhancer	FALSE	+								0.677164	0.7155	0.684487	0.692384	0.39306	0.325117	0.326371	0.348183	0.344201	2.08082	1.76782e-09	1.15361e-07	0.807798	0.79421	0.825172	0.80906	0.680887	0.608722	0.530104	0.606571	0.202489	1.4512	8.42412e-05	0.00067793	WTvsKO_0h	No
cg31005343_BC11	chr12	99341223	99341225	CG	EnhancerVista;chr12:99338620-99341271	FALSE	-	3300002A11Rik;Foxn3	3300002A11Rik;Foxn3;Foxn3;Foxn3;Foxn3	antisense;protein_coding;protein_coding;protein_coding;protein_coding	ENSMUST00000126476.7;ENSMUST00000046859.11;ENSMUST00000085108.7;ENSMUST00000176311.1;ENSMUST00000177451.7	70;52574;108851;15796;51849			0.0921052	0.157893	0.194605	0.148201	0.0482369	0.049171	0.0560452	0.051151	0.09705	1.62813	2.25594e-06	1.4651e-05	0.597634	0.602685	0.662856	0.621058	0.296167	0.306976	0.189025	0.264056	0.357002	2.22396	6.6261e-06	0.000201217	WTvsKO_96h	No
cg31019485_TC11	chr12	100514327	100514329	CG	Enhancer	FALSE	-	Ttc7b	Ttc7b;Ttc7b;Ttc7b;Ttc7b	protein_coding;protein_coding;protein_coding;protein_coding	ENSMUST00000062957.7;ENSMUST00000220614.1;ENSMUST00000223020.1;ENSMUST00000223444.1	6499;6495;6364;6465			0.435105	0.68776	0.645332	0.589399	0.27085	0.203034	0.296837	0.256907	0.332492	2.09064	4.19459e-07	4.30246e-06	0.939246	0.912818	0.947518	0.933194	0.74613	0.70778	0.606232	0.686714	0.24648	2.68627	2.78147e-06	0.00015616	WTvsKO_0h	No
cg31028194_TC11	chr12	101665582	101665584	CG	GeneBody;Tc2n;NM_001286364;.;splice=0,GeneBody;Tc2n;NM_028924;inside_[cds_in_exon_9];splice=0	FALSE	-	Tc2n	Tc2n;Tc2n;Tc2n;Tc2n	protein_coding;protein_coding;protein_coding;protein_coding	ENSMUST00000110047.8;ENSMUST00000160715.7;ENSMUST00000160830.1;ENSMUST00000162735.7	46323;43954;45991;52941			0.478948	0.640746	0.587571	0.569088	0.158389	0.14593	0.258281	0.187534	0.381555	2.56816	2.70815e-09	1.48739e-07	0.827361	0.828257	0.820482	0.825367	0.675327	0.595578	0.602456	0.624453	0.200913	1.50272	4.85837e-06	0.000181584	WTvsKO_0h	No
cg31028348_BC11	chr12	101704212	101704214	CG	Random	FALSE	-	Tc2n	Tc2n;Tc2n;Tc2n;Tc2n	protein_coding;protein_coding;protein_coding;protein_coding	ENSMUST00000110047.8;ENSMUST00000160715.7;ENSMUST00000160830.1;ENSMUST00000162735.7	7693;5324;7361;14311			0.502761	0.593288	0.568677	0.554909	0.150773	0.0906625	0.168217	0.136551	0.418358	3.02847	2.80473e-11	1.09842e-08	0.789687	0.822528	0.818216	0.810144	0.547527	0.515559	0.516597	0.526561	0.283582	1.94358	1.70218e-07	0.000103616	WTvsKO_0h	No
cg31028903_TC11	chr12	101772863	101772865	CG	Enhancer	FALSE	-	Fbln5	Fbln5;Fbln5;Fbln5	protein_coding;protein_coding;protein_coding	ENSMUST00000021603.8;ENSMUST00000221373.1;ENSMUST00000222587.1	46192;46096;45605			0.808058	0.894544	0.863986	0.85553	0.490337	0.401207	0.513814	0.468453	0.387077	2.7931	1.46165e-10	2.8752e-08	0.919928	0.941869	0.929415	0.930404	0.906521	0.879263	0.808264	0.864683	0.0657211	1.01381	0.00508214	0.0103239	WTvsKO_0h	No
cg31039307_BC11	chr12	102711421	102711423	CG	Random	FALSE	-	Gm28373	Gm28373	processed_transcript	ENSMUST00000178129.1	15912			0.400448	0.563244	0.573657	0.51245	0.176476	0.15856	0.147478	0.160838	0.351611	2.45808	1.20868e-09	9.27255e-08	0.849033	0.838917	0.854345	0.847432	0.64898	0.650084	0.598801	0.632622	0.21481	1.68886	6.21586e-07	0.000126753	WTvsKO_0h	No
cg31040065_BC21	chr12	102761274	102761276	CG	Enhancer	FALSE	-	Ubr7	Ubr7	protein_coding	ENSMUST00000046404.7	3308		Shelf	0.15459	0.234672	0.267649	0.21897	0.0657129	0.0649395	0.0596887	0.063447	0.155523	2.01543	2.30229e-08	5.80365e-07	0.544363	0.495845	0.611646	0.550618	0.218231	0.249246	0.169129	0.212202	0.338416	2.2054	3.19805e-06	0.000162402	WTvsKO_96h	No
cg31040157_BC21	chr12	102771927	102771929	CG	GeneBody;Ubr7;NM_025666;inside_[intron_between_exon_10_and_11];splice=0	FALSE	+	Ubr7	Ubr7	protein_coding	ENSMUST00000046404.7	13961			0.49428	0.555187	0.567091	0.538853	0.260638	0.203985	0.148081	0.204234	0.334618	2.22306	5.63442e-09	2.34627e-07	0.818868	0.788212	0.840256	0.815778	0.602334	0.582831	0.471818	0.552328	0.263451	1.84965	1.17854e-05	0.000251312	WTvsKO_0h	No
cg31059222_TC21	chr12	104760915	104760917	CG	Enhancer	FALSE	+								0.173494	0.253309	0.243803	0.223535	0.0960359	0.0692276	0.0616814	0.0756483	0.147887	1.822	1.23876e-07	1.80614e-06	0.670204	0.596792	0.694555	0.65385	0.341784	0.317397	0.223492	0.294224	0.359627	2.20698	6.52758e-06	0.000200164	WTvsKO_96h	No
cg31060580_TC11	chr12	104857485	104857487	CG	lincRNATSS;chr12:104857371;4930408O17Rik;ENSMUST00000222624;115	FALSE	-	4930408O17Rik;Clmn	4930408O17Rik;Clmn;Clmn;Clmn;Clmn;Clmn;Clmn	lincRNA;protein_coding;protein_coding;protein_coding;protein_coding;protein_coding;protein_coding	ENSMUST00000222624.1;ENSMUST00000109936.2;ENSMUST00000109937.8;ENSMUST00000222412.1;ENSMUST00000223103.1;ENSMUST00000223177.1;ENSMUST00000223342.1	115;7591;7524;2257;7591;7591;7591			0.444976	0.597444	0.540704	0.527708	0.156055	0.0986389	0.116435	0.12371	0.403998	3.01233	2.56935e-11	1.03798e-08	0.753401	0.770774	0.79335	0.772508	0.537726	0.427182	0.305366	0.423425	0.349083	2.23079	3.39443e-05	0.000412071	Common	No
cg31063041_TC11	chr12	105030951	105030953	CG	Clock;Meer435;-0.248133912683,Clock;Meer435;0.0292166263901	FALSE	+	Snhg10	Snhg10;Snhg10	lincRNA;lincRNA	ENSMUST00000222672.1;ENSMUST00000222812.1	1328;1326		Shore	0.257334	0.32503	0.386539	0.322968	0.0510249	0.0349752	0.0791148	0.0550383	0.26793	3.0982	9.89204e-11	2.34482e-08	0.655689	0.607891	0.705034	0.656205	0.305218	0.319648	0.272721	0.299196	0.357009	2.1702	5.78897e-07	0.000124362	WTvsKO_96h	No
cg31081872_TC11	chr12	106447631	106447633	CG	lincRNATSS;chr12:106447666;1700121N20Rik;ENSMUST00000167922;33	FALSE	+	1700121N20Rik	1700121N20Rik	lincRNA	ENSMUST00000167922.1	35			0.0919738	0.178605	0.192983	0.154521	0.0393617	0.0330668	0.0396128	0.0373471	0.117174	2.16994	3.39142e-08	7.49621e-07	0.506988	0.430901	0.590299	0.509397	0.142875	0.111703	0.126506	0.127028	0.382368	2.8432	4.16169e-07	0.000120815	WTvsKO_96h	No
cg31107295_BC11	chr12	108465718	108465720	CG	Enhancer	FALSE	+	Eml1	Eml1;Eml1;Eml1;Eml1;Eml1	protein_coding;protein_coding;protein_coding;protein_coding;protein_coding	ENSMUST00000054955.13;ENSMUST00000109857.7;ENSMUST00000109860.7;ENSMUST00000130999.1;ENSMUST00000138456.7	55177;55057;42903;42641;94762		Shelf	0.236184	0.39716	0.376707	0.336684	0.139422	0.0862586	0.0627473	0.0961425	0.240541	2.30329	7.57405e-08	1.28886e-06	0.699117	0.748626	0.788979	0.745574	0.534375	0.355963	0.222711	0.371016	0.374558	2.38445	0.000276551	0.00139566	WTvsKO_96h	No
cg31119395_BC11	chr12	109525935	109525937	CG	ImprintDMR;chr12:109524493-109534883;P;DMR_Dlk1_Gtl2	FALSE	+							Shelf	0.313737	0.322018	0.32907	0.321608	0.0233721	0.0229062	0.1058	0.0506928	0.270916	3.54927	4.07571e-09	1.91255e-07	0.50532	0.479355	0.506749	0.497141	0.15259	0.121557	0.163696	0.145948	0.351194	2.54339	4.70074e-08	5.81449e-05	WTvsKO_96h	No
cg31119398_TC21	chr12	109526079	109526081	CG	ImprintDMR;chr12:109524493-109534883;P;DMR_Dlk1_Gtl2	FALSE	-							Shelf	0.394731	0.397369	0.366056	0.386052	0.0423987	0.0362991	0.173124	0.0839407	0.302111	3.15799	4.16481e-08	8.60635e-07	0.558669	0.489122	0.509696	0.519162	0.175225	0.161384	0.216246	0.184285	0.334877	2.26778	3.18746e-07	0.000113107	WTvsKO_96h	No
cg31119407_TC11	chr12	109526514	109526516	CG	ImprintDMR;chr12:109524493-109534883;P;DMR_Dlk1_Gtl2	FALSE	-							Shore	0.307583	0.355835	0.376396	0.346605	0.0274675	0.0194801	0.0951906	0.0473794	0.299225	3.76429	8.2081e-10	7.43193e-08	0.605185	0.603045	0.633968	0.614066	0.187635	0.153225	0.173124	0.171328	0.442738	2.94944	4.70747e-09	1.39737e-05	WTvsKO_96h	No
cg31119410_TC21	chr12	109526595	109526597	CG	ImprintDMR;chr12:109524493-109534883;P;DMR_Dlk1_Gtl2	FALSE	+							Shore	0.317036	0.351108	0.340401	0.336182	0.0559602	0.0609514	0.130174	0.0823619	0.25382	2.60485	2.22121e-09	1.32229e-07	0.605931	0.608361	0.639125	0.617806	0.295939	0.278333	0.264933	0.279735	0.338071	2.05929	6.53345e-08	7.04099e-05	WTvsKO_96h	No
cg31119414_TC11	chr12	109526677	109526679	CG	ImprintDMR;chr12:109524493-109534883;P;DMR_Dlk1_Gtl2	FALSE	-							Shore	0.622764	0.64606	0.656446	0.641757	0.0351054	0.0522323	0.268313	0.11855	0.523206	4.31165	6.24776e-09	2.50256e-07	0.907222	0.907147	0.926739	0.913703	0.533822	0.459258	0.481764	0.491615	0.422088	3.46147	4.7012e-09	1.39737e-05	Common	No
cg31119417_BC21	chr12	109526717	109526719	CG	ImprintDMR;chr12:109524493-109534883;P;DMR_Dlk1_Gtl2	FALSE	-							Shore	0.468449	0.461494	0.456429	0.462124	0.0922448	0.081306	0.202454	0.125335	0.336789	2.70595	2.68582e-09	1.48327e-07	0.682172	0.69199	0.732314	0.702158	0.422606	0.412153	0.359036	0.397932	0.304227	1.84007	8.44299e-07	0.000129051	WTvsKO_0h	No
cg31119422_BC21	chr12	109526826	109526828	CG	ImprintDMR;chr12:109524493-109534883;P;DMR_Dlk1_Gtl2	FALSE	-							Shore	0.557704	0.589924	0.564393	0.570674	0.188533	0.157325	0.294076	0.213311	0.357363	2.34102	3.60188e-09	1.77574e-07	0.790343	0.811824	0.821924	0.80803	0.605651	0.607013	0.545221	0.585961	0.222069	1.57404	2.39056e-06	0.000150026	WTvsKO_0h	No
cg31119423_TC21	chr12	109526861	109526863	CG	ImprintDMR;chr12:109524493-109534883;P;DMR_Dlk1_Gtl2	FALSE	-							Shore	0.487127	0.501359	0.493032	0.493839	0.125451	0.108018	0.21261	0.148693	0.345146	2.54311	8.23373e-10	7.44224e-08	0.701463	0.670892	0.716601	0.696319	0.446769	0.44906	0.406423	0.434084	0.262235	1.5827	1.27038e-06	0.00013617	WTvsKO_0h	No
cg31119424_BC11	chr12	109526875	109526877	CG	ImprintDMR;chr12:109524493-109534883;P;DMR_Dlk1_Gtl2	FALSE	+							Shore	0.596809	0.688125	0.669788	0.651574	0.286045	0.240457	0.323983	0.283495	0.368079	2.25597	1.24453e-09	9.43125e-08	0.883005	0.851471	0.887174	0.873884	0.715765	0.681285	0.624081	0.67371	0.200173	1.7502	6.03798e-06	0.000195276	WTvsKO_0h	No
cg31119427_TC21	chr12	109527109	109527111	CG	ImprintDMR;chr12:109524493-109534883;P;DMR_Dlk1_Gtl2	FALSE	-							Shore	0.513526	0.544308	0.531658	0.529831	0.205438	0.150922	0.210578	0.188979	0.340851	2.28912	4.51547e-10	5.32949e-08	0.744304	0.712776	0.733278	0.73012	0.577841	0.495434	0.501066	0.52478	0.205339	1.29302	1.99237e-05	0.000317153	WTvsKO_0h	No
cg31119430_TC21	chr12	109527242	109527244	CG	ImprintDMR;chr12:109524493-109534883;P;DMR_Dlk1_Gtl2	FALSE	-							Shore	0.551872	0.557965	0.556968	0.555601	0.252038	0.182075	0.238191	0.224102	0.3315	2.12689	1.54115e-09	1.06671e-07	0.698774	0.701661	0.710207	0.703547	0.573956	0.563125	0.440561	0.525881	0.177667	1.09649	0.000391437	0.00174683	WTvsKO_0h	No
cg31119444_BC21	chr12	109527575	109527577	CG	ImprintDMR;chr12:109524493-109534883;P;DMR_Dlk1_Gtl2	FALSE	+							Shore	0.66948	0.606322	0.611166	0.62899	0.0881661	0.0557336	0.35781	0.167237	0.461753	3.53021	1.16312e-07	1.73112e-06	0.671968	0.64091	0.648285	0.653721	0.111228	0.114852	0.499238	0.241773	0.411948	2.90046	0.00170025	0.00467851	Common	No
cg31119498_BC11	chr12	109529096	109529098	CG	ImprintDMR;chr12:109524493-109534883;P;DMR_Dlk1_Gtl2	FALSE	+							Shore	0.419089	0.369	0.393387	0.393825	0.0311391	0.0419501	0.148912	0.0740004	0.319825	3.3726	7.60157e-09	2.8387e-07	0.453724	0.41397	0.418556	0.42875	0.0401998	0.0331676	0.159493	0.0776203	0.35113	3.53239	8.14004e-05	0.000665376	WTvsKO_96h	No
cg31119523_TC11	chr12	109530456	109530458	CG	ImprintDMR;chr12:109524493-109534883;P;DMR_Dlk1_Gtl2	FALSE	+	Gm27528	Gm27528	TEC	ENSMUST00000222916.1	-435		Shore	0.419807	0.428037	0.431399	0.426414	0.00788907	0.0132915	0.150448	0.0572096	0.369205	4.80087	7.91651e-08	1.32893e-06	0.453622	0.436246	0.412524	0.434131	0.020688	0.0130899	0.178882	0.0708867	0.363244	4.28383	0.000564875	0.0022186	Common	No
cg31119533_BC11	chr12	109531037	109531039	CG	ImprintDMR;chr12:109524493-109534883;P;DMR_Dlk1_Gtl2	FALSE	+	Gm27528	Gm27528;Gm27528	TEC;misc_RNA	ENSMUST00000222916.1;ENSMUST00000183544.1	146;-1404		Shelf	0.40407	0.401581	0.406471	0.404041	0.0242014	0.0150652	0.164025	0.0677638	0.336277	4.01051	8.38319e-08	1.383e-06	0.43384	0.412867	0.395407	0.414038	0.0418714	0.0528231	0.176165	0.0902865	0.323751	3.13377	0.00010655	0.000776182	WTvsKO_0h	No
cg31119534_TC11	chr12	109531206	109531208	CG	ImprintDMR;chr12:109524493-109534883;P;DMR_Dlk1_Gtl2	FALSE	+	Gm27528	Gm27528;Gm27528	TEC;misc_RNA	ENSMUST00000222916.1;ENSMUST00000183544.1	315;-1235		Shelf	0.481071	0.519524	0.509035	0.50321	0.108004	0.0933988	0.240739	0.147381	0.355829	2.67921	5.94934e-09	2.42522e-07	0.571027	0.571861	0.584303	0.575731	0.313978	0.287447	0.326053	0.30916	0.266571	1.60209	4.9199e-07	0.000123408	WTvsKO_0h	No
cg31119537_BC21	chr12	109531677	109531679	CG	ImprintDMR;chr12:109524493-109534883;P;DMR_Dlk1_Gtl2	FALSE	-	Gm27528	Gm27528;Gm27528	TEC;misc_RNA	ENSMUST00000222916.1;ENSMUST00000183544.1	786;-764		Shelf	0.505226	0.456428	0.455987	0.472547	0.105705	0.113154	0.158198	0.125685	0.346862	2.6621	3.98854e-11	1.39662e-08	0.689218	0.665141	0.724929	0.693096	0.401131	0.382135	0.333356	0.372207	0.320889	1.93614	7.29064e-07	0.000127929	WTvsKO_0h	No
cg31119576_BC11	chr12	109535024	109535026	CG	Random	FALSE	+								0.591148	0.726304	0.665052	0.660835	0.376283	0.315289	0.297426	0.329666	0.331168	2.00583	2.22983e-08	5.68492e-07	0.880971	0.882581	0.908675	0.890742	0.816909	0.798342	0.650105	0.755119	0.135624	1.35869	0.00136186	0.00400888	WTvsKO_0h	No
cg31119653_TC11	chr12	109540457	109540459	CG	MonoallelicMeth	FALSE	+	Gm27596;Meg3	Gm27596;Meg3;Meg3;Meg3	misc_RNA;lincRNA;lincRNA;lincRNA	ENSMUST00000185061.1;ENSMUST00000124106.7;ENSMUST00000129245.7;ENSMUST00000143836.7	-710;-549;-543;-547			0.442503	0.494136	0.483851	0.473497	0.0655399	0.033065	0.155144	0.084583	0.388914	3.56283	1.22491e-09	9.33163e-08	0.533902	0.553126	0.554657	0.547229	0.229907	0.250173	0.286848	0.255643	0.291586	1.82063	4.61124e-07	0.000122103	WTvsKO_0h	No
cg31119663_BC11	chr12	109540806	109540808	CG	MonoallelicMeth	FALSE	+	Gm27596;Meg3	Gm27596;Meg3;Meg3;Meg3;Meg3;Meg3	misc_RNA;lincRNA;lincRNA;lincRNA;lincRNA;lincRNA	ENSMUST00000185061.1;ENSMUST00000124106.7;ENSMUST00000128178.1;ENSMUST00000129245.7;ENSMUST00000143272.7;ENSMUST00000143836.7	-361;-200;-1461;-194;-1216;-198			0.496008	0.496836	0.488441	0.493762	0.0663267	0.0524897	0.265365	0.128061	0.365701	3.11677	1.22855e-07	1.79596e-06	0.50239	0.515938	0.490747	0.503025	0.100484	0.107052	0.286618	0.164718	0.338307	2.53013	0.000157983	0.000984634	Common	No
cg31119715_TC21	chr12	109542170	109542172	CG	EPIC;cg00743158	FALSE	+	Meg3	Meg3;Meg3;Meg3;Meg3;Meg3	lincRNA;lincRNA;lincRNA;lincRNA;lincRNA	ENSMUST00000124106.7;ENSMUST00000128178.1;ENSMUST00000129245.7;ENSMUST00000143272.7;ENSMUST00000143836.7	1164;-97;1170;148;1166			0.431377	0.455228	0.417534	0.434713	0.0298634	0.0658445	0.14447	0.0800592	0.354654	3.42549	2.67805e-09	1.47992e-07	0.503152	0.416915	0.480369	0.466812	0.0577272	0.0725271	0.21179	0.114015	0.352797	3.00746	9.83721e-05	0.000740519	Common	No
cg31119722_BC11	chr12	109542340	109542342	CG	MonoallelicMeth,VMR;chr12:109542189-109542513,lincRNATSS;chr12:109542268;Meg3;ENSMUST00000128178;73	FALSE	-	Meg3	Meg3;Meg3;Meg3;Meg3;Meg3	lincRNA;lincRNA;lincRNA;lincRNA;lincRNA	ENSMUST00000124106.7;ENSMUST00000128178.1;ENSMUST00000129245.7;ENSMUST00000143272.7;ENSMUST00000143836.7	1334;73;1340;318;1336			0.485824	0.450355	0.452571	0.462917	0.0402144	0.0410563	0.278456	0.119909	0.343008	3.28418	9.31073e-07	7.64463e-06	0.459261	0.46726	0.449109	0.458543	0.0473061	0.0337105	0.298959	0.126659	0.331885	3.22771	0.00192903	0.00510751	Common	No
cg31123918_BC11	chr12	109926870	109926872	CG	CTCF	FALSE	+								0.315793	0.622905	0.531265	0.489988	0.166681	0.197978	0.209622	0.191427	0.298561	2.01471	1.48504e-06	1.07717e-05	0.821291	0.860368	0.884165	0.855275	0.55541	0.606648	0.408397	0.523485	0.33179	2.44813	1.351e-05	0.000266465	WTvsKO_96h	No
cg31131498_TC11	chr12	110498437	110498439	CG	Enhancer	FALSE	+	Ppp2r5c	Ppp2r5c;Ppp2r5c;Ppp2r5c;Ppp2r5c;Ppp2r5c;Ppp2r5c	protein_coding;protein_coding;protein_coding;protein_coding;protein_coding;protein_coding	ENSMUST00000084985.10;ENSMUST00000109832.2;ENSMUST00000220509.1;ENSMUST00000221074.1;ENSMUST00000221715.1;ENSMUST00000223168.1	12579;12699;51186;12579;12700;51131			0.106336	0.22811	0.2363	0.190249	0.0248047	0.037742	0.0380574	0.0335347	0.156714	2.70225	3.88e-09	1.8539e-07	0.72293	0.695622	0.813775	0.744109	0.303401	0.27331	0.266853	0.281188	0.462921	2.92387	3.51569e-07	0.000118346	WTvsKO_96h	No
cg31131524_TC21	chr12	110499817	110499819	CG	Random	FALSE	+	Ppp2r5c	Ppp2r5c;Ppp2r5c;Ppp2r5c;Ppp2r5c;Ppp2r5c;Ppp2r5c	protein_coding;protein_coding;protein_coding;protein_coding;protein_coding;protein_coding	ENSMUST00000084985.10;ENSMUST00000109832.2;ENSMUST00000220509.1;ENSMUST00000221074.1;ENSMUST00000221715.1;ENSMUST00000223168.1	13959;14079;52566;13959;14080;52511			0.0927862	0.205942	0.199974	0.166234	0.0295445	0.0203134	0.0458224	0.0318934	0.134341	2.59098	2.67373e-08	6.39412e-07	0.628278	0.598894	0.716782	0.647985	0.295745	0.268569	0.212137	0.258817	0.389168	2.42175	1.88004e-06	0.000142597	WTvsKO_96h	No
cg31134802_BC11	chr12	110693952	110693954	CG	GeneBody;Hsp90aa1;NM_010480;inside_[intron_between_exon_5_and_6];splice=0	FALSE	+	Hsp90aa1	Hsp90aa1;Hsp90aa1;Hsp90aa1;Hsp90aa1	protein_coding;protein_coding;protein_coding;protein_coding	ENSMUST00000021698.12;ENSMUST00000094361.10;ENSMUST00000129005.1;ENSMUST00000134967.1	2337;2443;-772;340		Shore	0.261963	0.413001	0.402327	0.359097	0.198431	0.16395	0.220912	0.194431	0.164666	1.20343	8.98061e-05	0.000251863	0.743003	0.756664	0.83883	0.779499	0.303624	0.346567	0.383397	0.344529	0.43497	2.78203	6.59905e-07	0.000127457	WTvsKO_96h	No
cg31135041_BC21	chr12	110702623	110702625	CG	TSS;chr12:110702727;Hsp90aa1;ENSMUST00000155242;+104;1	FALSE	-	Hsp90aa1	Hsp90aa1	protein_coding	ENSMUST00000155242.7	105			0.0917413	0.177923	0.160206	0.14329	0.0574107	0.0648898	0.0524613	0.0582539	0.0850361	1.38519	1.51712e-05	6.19822e-05	0.613979	0.562585	0.679816	0.618793	0.289527	0.334024	0.222905	0.282152	0.336641	2.07036	9.9938e-06	0.00023574	WTvsKO_96h	No
cg31175323_BC21	chr12	113490389	113490391	CG	TSS;chr12:113489510;Adam6b;ENSMUST00000063317;+879;1	FALSE	+	Adam6b	Adam6b	protein_coding	ENSMUST00000063317.3	879			0.679441	0.701202	0.652969	0.677871	0.302924	0.268077	0.390885	0.320629	0.357242	2.17258	2.8985e-09	1.55407e-07	0.835006	0.825354	0.836097	0.832153	0.730664	0.662041	0.730488	0.707731	0.124421	1.02747	0.000102591	0.00075896	WTvsKO_0h	No
cg31176801_BC21	chr12	113803311	113803313	CG	PseudogeneTSS;chr12:113803333;Gm7003;ENSMUST00000195089;20	FALSE	-	Gm7003	Gm7003	IG_V_pseudogene	ENSMUST00000195089.1	22			0.719937	0.824827	0.713918	0.752894	0.444104	0.307091	0.498011	0.416402	0.336492	2.14205	1.0998e-07	1.66332e-06	0.823821	0.790911	0.792418	0.802383	0.673915	0.679501	0.733385	0.695601	0.106783	0.82866	0.000557449	0.00219948	WTvsKO_0h	No
cg31181877_BC21	chr12	114969305	114969307	CG	PseudogeneTSS;chr12:114970488;Ighv1-45;ENSMUST00000193677;1181	FALSE	-								0.587114	0.646132	0.566787	0.600011	0.231139	0.222879	0.275303	0.243107	0.356904	2.23215	6.8841e-10	6.74516e-08	0.765055	0.816291	0.79704	0.792796	0.582028	0.619852	0.609037	0.603639	0.189156	1.33527	9.32366e-06	0.000229075	WTvsKO_0h	No
cg31181910_BC11	chr12	114979544	114979546	CG	Random	FALSE	+	Ighv1-46	Ighv1-46	IG_V_pseudogene	ENSMUST00000193988.1	-1418			0.690015	0.766712	0.741798	0.732842	0.303969	0.235409	0.354821	0.298066	0.434775	2.71696	8.09564e-11	2.0938e-08	0.860112	0.901925	0.899193	0.887077	0.662837	0.697285	0.676395	0.678839	0.208238	1.9119	1.49061e-06	0.000139345	WTvsKO_0h	No
cg31209212_TC21	chr12	119156909	119156911	CG	Adenoma	FALSE	-								0.633648	0.693349	0.619339	0.648778	0.312586	0.272428	0.35845	0.314488	0.334291	2.0212	6.35436e-09	2.5334e-07	0.825241	0.827019	0.815581	0.822613	0.769819	0.700241	0.762443	0.744168	0.0784458	0.664479	0.0025077	0.00615803	WTvsKO_0h	No
cg31209383_BC11	chr12	119197716	119197718	CG	Adenoma	FALSE	+	Itgb8	Itgb8;Itgb8	protein_coding;protein_coding	ENSMUST00000026360.8;ENSMUST00000151023.7	41086;41085			0.431079	0.569486	0.498466	0.499677	0.139029	0.130293	0.21631	0.161877	0.3378	2.407	2.66666e-09	1.4755e-07	0.680967	0.743542	0.737314	0.720608	0.500512	0.483542	0.521651	0.501902	0.218706	1.36185	9.29407e-06	0.000228649	WTvsKO_0h	No
cg31210323_BC21	chr12	119392616	119392618	CG	TSS;chr12:119392582;Macc1;ENSMUST00000221866;+34;1	FALSE	-	Macc1	Macc1;Macc1;Macc1;Macc1	protein_coding;protein_coding;protein_coding;protein_coding	ENSMUST00000221866.1;ENSMUST00000221917.1;ENSMUST00000222058.1;ENSMUST00000222784.1	34;65009;2242;78347			0.615566	0.669647	0.612084	0.632432	0.216684	0.153843	0.292568	0.221032	0.411401	2.64795	4.5563e-10	5.35312e-08	0.831946	0.826812	0.873762	0.844173	0.656312	0.605096	0.611536	0.624315	0.219859	1.71676	3.69626e-06	0.000168976	WTvsKO_0h	No
cg31210326_TC21	chr12	119393216	119393218	CG	TSS;chr12:119392582;Macc1;ENSMUST00000221866;+634;2	FALSE	-	Macc1	Macc1;Macc1;Macc1;Macc1	protein_coding;protein_coding;protein_coding;protein_coding	ENSMUST00000221866.1;ENSMUST00000221917.1;ENSMUST00000222058.1;ENSMUST00000222784.1	634;65609;2842;78947			0.556971	0.658807	0.556452	0.590743	0.174217	0.148116	0.245875	0.189403	0.401341	2.66411	2.65247e-10	3.95503e-08	0.775222	0.779688	0.830504	0.795138	0.614043	0.57529	0.616519	0.601951	0.193187	1.36983	1.66963e-05	0.000292229	WTvsKO_0h	No
cg31210574_BC21	chr12	119463133	119463135	CG	GeneBody;Macc1;NM_001163136;inside_[intron_between_exon_3_and_4];splice=0	FALSE	+	Macc1	Macc1;Macc1;Macc1;Macc1;Macc1	protein_coding;protein_coding;protein_coding;protein_coding;protein_coding	ENSMUST00000048880.6;ENSMUST00000221866.1;ENSMUST00000221917.1;ENSMUST00000222058.1;ENSMUST00000222784.1	19724;70551;135526;72759;148864			0.640834	0.677023	0.613928	0.643929	0.261888	0.210904	0.311498	0.26143	0.382499	2.37167	5.02375e-10	5.6443e-08	0.823071	0.826536	0.802	0.817202	0.630327	0.59782	0.629353	0.619167	0.198036	1.46095	1.49491e-06	0.00013941	WTvsKO_0h	No
cg31212970_BC21	chr12	120011303	120011305	CG	Adenoma	FALSE	-	Tmem196	Tmem196;Tmem196;Tmem196;Tmem196;Tmem196	protein_coding;protein_coding;protein_coding;protein_coding;protein_coding	ENSMUST00000058644.14;ENSMUST00000183694.7;ENSMUST00000184069.2;ENSMUST00000184209.1;ENSMUST00000184820.7	65347;64894;64734;64880;64746			0.690788	0.785647	0.712446	0.729627	0.406748	0.311199	0.474985	0.397644	0.331982	2.05924	4.27433e-08	8.7359e-07	0.86198	0.855478	0.845175	0.854211	0.819114	0.786935	0.825426	0.810492	0.0437196	0.450535	0.0116299	0.0195708	WTvsKO_0h	No
cg31212980_TC21	chr12	120014079	120014081	CG	GeneBody;Tmem196;NM_001294154;inside_[intron_between_exon_2_and_3];splice=0	FALSE	-	Tmem196	Tmem196;Tmem196;Tmem196;Tmem196;Tmem196	protein_coding;protein_coding;protein_coding;protein_coding;protein_coding	ENSMUST00000058644.14;ENSMUST00000183694.7;ENSMUST00000184069.2;ENSMUST00000184209.1;ENSMUST00000184820.7	68123;67670;67510;67656;67522			0.594031	0.687225	0.602433	0.627896	0.260813	0.199526	0.313172	0.257837	0.370059	2.30821	2.49086e-09	1.41325e-07	0.834605	0.837364	0.821358	0.831109	0.684324	0.678582	0.661563	0.674823	0.156286	1.24634	3.35981e-06	0.000164577	WTvsKO_0h	No
cg31219801_TC21	chr13	3752736	3752738	CG	Enhancer	FALSE	+								0.541949	0.642983	0.558658	0.581197	0.243384	0.213422	0.282253	0.246353	0.334844	2.09873	4.43998e-09	2.01425e-07	0.764794	0.825769	0.785007	0.791856	0.634648	0.533393	0.596572	0.588204	0.203652	1.42008	4.37754e-05	0.000471314	WTvsKO_0h	No
cg31224961_BC21	chr13	4644478	4644480	CG	lincRNATSS;chr13:4643907;Gm40658;ENSMUST00000221900;572	FALSE	-	Gm40658	Gm40658	lincRNA	ENSMUST00000221900.1	572			0.688701	0.755235	0.695627	0.713188	0.3631	0.284622	0.443578	0.363767	0.349421	2.14364	1.16314e-08	3.71436e-07	0.862348	0.870555	0.842914	0.858606	0.782877	0.739193	0.736266	0.752779	0.105827	0.995427	0.000113345	0.000804758	WTvsKO_0h	No
cg31242406_TC21	chr13	7691224	7691226	CG	VMR;chr13:7691219-7691459	FALSE	+								0.686915	0.752201	0.679348	0.706155	0.373218	0.317894	0.37797	0.356361	0.349794	2.12893	2.00841e-09	1.24522e-07	0.846489	0.857388	0.878023	0.860633	0.775264	0.753625	0.749607	0.759499	0.101135	0.972422	8.30215e-05	0.000672899	WTvsKO_0h	No
cg31242764_BC21	chr13	7770687	7770689	CG	PMDsoloWCGW	FALSE	-								0.536602	0.686148	0.662526	0.628425	0.25954	0.219434	0.355705	0.278226	0.350199	2.17116	3.41158e-08	7.52791e-07	0.803208	0.817719	0.792526	0.804484	0.758598	0.696329	0.739652	0.731527	0.0729578	0.590835	0.00383704	0.0083729	WTvsKO_0h	No
cg31242956_BC21	chr13	7820037	7820039	CG	PMDsoloWCGW	FALSE	-								0.485709	0.56967	0.508644	0.521341	0.180057	0.155341	0.208856	0.181418	0.339923	2.30784	4.70975e-10	5.4437e-08	0.721525	0.759113	0.753327	0.744655	0.563363	0.544705	0.543649	0.550572	0.194083	1.25377	5.22534e-06	0.000186574	WTvsKO_0h	No
cg31243585_TC21	chr13	7983061	7983063	CG	PMDsoloWCGW	FALSE	+								0.602993	0.683089	0.679444	0.655175	0.248758	0.246793	0.340589	0.278713	0.376462	2.31739	1.13136e-09	8.92577e-08	0.786301	0.7996	0.815574	0.800492	0.644619	0.616437	0.638955	0.633337	0.167155	1.21786	6.4418e-06	0.000199345	WTvsKO_0h	No
cg31243745_TC11	chr13	8013440	8013442	CG	Random	FALSE	-								0.668575	0.760223	0.721865	0.716888	0.328774	0.250898	0.442515	0.340729	0.376159	2.33135	1.05656e-08	3.48741e-07	0.877882	0.907347	0.893857	0.893029	0.804969	0.813872	0.762636	0.793826	0.0992033	1.11797	9.62639e-05	0.000731863	WTvsKO_0h	No
cg31245402_BC11	chr13	8318296	8318298	CG	PMDsoloWCGW	FALSE	-	Adarb2	Adarb2;Adarb2;Adarb2;Adarb2	protein_coding;protein_coding;protein_coding;protein_coding	ENSMUST00000064473.12;ENSMUST00000123187.1;ENSMUST00000135574.7;ENSMUST00000139438.1	115431;115375;115384;115389			0.392391	0.568138	0.576074	0.512201	0.123229	0.0783924	0.158329	0.119983	0.392218	3.00127	4.49753e-10	5.32325e-08	0.733751	0.804774	0.80605	0.781525	0.575469	0.536176	0.479086	0.530243	0.251282	1.67797	1.60375e-05	0.000287233	WTvsKO_0h	No
cg31252999_BC21	chr13	9268755	9268757	CG	lincRNATSS;chr13:9268684;Gm48825;ENSMUST00000221031;72	FALSE	+	Gm48825	Gm48825	lincRNA	ENSMUST00000221031.1	72			0.62874	0.685521	0.655752	0.656671	0.32476	0.267769	0.360677	0.317735	0.338936	2.04905	4.29352e-09	1.97713e-07	0.845545	0.85233	0.852827	0.850234	0.730488	0.676462	0.715909	0.70762	0.142615	1.22682	9.27827e-06	0.000228557	WTvsKO_0h	No
cg31261131_BC21	chr13	10556604	10556606	CG	lincRNATSS;chr13:10557707;Gm36525;ENSMUST00000222590;1101	FALSE	-	Gm26861;Gm36525	Gm26861;Gm26861;Gm26861;Gm26861;Gm26861;Gm36525	antisense;antisense;antisense;antisense;antisense;lincRNA	ENSMUST00000180807.2;ENSMUST00000221649.1;ENSMUST00000222066.1;ENSMUST00000222633.1;ENSMUST00000223253.1;ENSMUST00000222590.1	199010;1932;1946;1932;1918;1103			0.70212	0.727349	0.670563	0.700011	0.3793	0.344442	0.345986	0.356576	0.343434	2.07852	1.32867e-09	9.82097e-08	0.818544	0.810065	0.8302	0.819603	0.727906	0.682309	0.616452	0.675556	0.144047	1.11619	0.000193944	0.00111566	WTvsKO_0h	No
cg31279212_TC21	chr13	13284337	13284339	CG	PseudogeneTSS;chr13:13283832;Gm48590;ENSMUST00000222393;506	FALSE	+								0.600526	0.610912	0.561269	0.590902	0.190394	0.16483	0.314729	0.223318	0.367584	2.38208	4.62734e-09	2.06836e-07	0.764382	0.768681	0.790655	0.774573	0.609101	0.576627	0.659045	0.614925	0.159648	1.10371	6.11819e-05	0.000565813	WTvsKO_0h	No
cg31288452_TC11	chr13	14637288	14637290	CG	EPIC;cg21485062	FALSE	+	AW209491;Psma2	AW209491;AW209491;Psma2	protein_coding;protein_coding;protein_coding	ENSMUST00000038690.5;ENSMUST00000178289.2;ENSMUST00000221168.1	7041;7135;20517			0.731659	0.849573	0.770123	0.783785	0.416995	0.372237	0.472942	0.420725	0.36306	2.36093	3.48756e-09	1.73983e-07	0.927968	0.932577	0.949557	0.936701	0.837939	0.798579	0.817724	0.818081	0.11862	1.7296	3.75741e-06	0.000170283	WTvsKO_0h	No
cg31304618_TC11	chr13	17801204	17801206	CG	TSS;chr13:17801330;Cdk13;ENSMUST00000222800;+126;2	FALSE	+	Cdk13	Cdk13;Cdk13;Cdk13;Cdk13;Cdk13	protein_coding;protein_coding;protein_coding;protein_coding;protein_coding	ENSMUST00000042365.8;ENSMUST00000221775.1;ENSMUST00000222800.1;ENSMUST00000222848.1;ENSMUST00000223490.1	3447;3443;127;2264;3893		Shelf	0.643678	0.743671	0.708163	0.698504	0.346725	0.331784	0.351958	0.343489	0.355015	2.1578	1.50807e-09	1.05002e-07	0.885069	0.87495	0.901898	0.887306	0.811375	0.754814	0.761871	0.77602	0.111286	1.18248	6.72459e-05	0.000596637	WTvsKO_0h	No
cg31330224_BC21	chr13	21358864	21358866	CG	MonoallelicMeth	FALSE	+							Shelf	0.532901	0.567398	0.570326	0.556875	0.229461	0.179099	0.221683	0.210081	0.346794	2.24864	3.91829e-10	4.93506e-08	0.702348	0.759674	0.718991	0.727004	0.494364	0.498956	0.508174	0.500498	0.226506	1.41523	3.73379e-06	0.000169802	WTvsKO_0h	No
cg31330225_BC11	chr13	21358930	21358932	CG	Random	FALSE	-							Shelf	0.603935	0.660898	0.598986	0.621273	0.313646	0.240066	0.31242	0.288711	0.332562	2.02684	5.53251e-09	2.31825e-07	0.743298	0.776266	0.74616	0.755241	0.604554	0.540405	0.554958	0.566639	0.188602	1.23989	1.54042e-05	0.000281962	WTvsKO_0h	No
cg31330618_TC21	chr13	21405479	21405481	CG	MonoallelicMeth	FALSE	+							Shelf	0.525404	0.528726	0.509688	0.521273	0.195439	0.147227	0.174993	0.172553	0.348719	2.39377	1.06862e-10	2.44006e-08	0.684207	0.680854	0.687289	0.684117	0.47917	0.42752	0.393282	0.433324	0.250793	1.50388	3.46566e-06	0.000165911	WTvsKO_0h	No
cg31331926_TC21	chr13	21542654	21542656	CG	TSS;chr13:21542774;Olfr1366;ENSMUST00000205976;+120;1,TSS;chr13:21542807;Olfr1366;ENSMUST00000175637;+153;1	FALSE	-	Olfr1366	Olfr1366;Olfr1366	protein_coding;protein_coding	ENSMUST00000175637.2;ENSMUST00000205976.2	154;121			0.51407	0.575418	0.520714	0.536734	0.18368	0.152978	0.261555	0.199404	0.33733	2.25259	3.44981e-09	1.72977e-07	0.759272	0.766893	0.750866	0.75901	0.512024	0.485797	0.551705	0.516509	0.242502	1.56001	1.26758e-06	0.00013617	WTvsKO_0h	No
cg31331996_TC11	chr13	21559475	21559477	CG	TSS;chr13:21559892;Olfr1535;ENSMUST00000217519;+417;2	FALSE	-	Olfr1535	Olfr1535	protein_coding	ENSMUST00000217519.1	418			0.620801	0.669126	0.612209	0.634046	0.273774	0.22231	0.274787	0.256957	0.377088	2.33335	2.40443e-10	3.74081e-08	0.786237	0.834994	0.806629	0.809287	0.606537	0.570399	0.625401	0.600779	0.208508	1.50199	5.32375e-06	0.000187624	WTvsKO_0h	No
cg31333699_BC11	chr13	21778173	21778175	CG	Enhancer	FALSE	-							Shelf	0.515288	0.677157	0.602877	0.598441	0.25123	0.151721	0.290831	0.231261	0.36718	2.36792	2.03429e-08	5.34049e-07	0.810429	0.836086	0.841078	0.829198	0.612735	0.564034	0.572607	0.583125	0.246072	1.79836	5.04625e-07	0.000123541	WTvsKO_0h	No
cg31372017_TC11	chr13	27098541	27098543	CG	GeneBody;Prl3d1;NM_001205322;inside_[intron_between_exon_3_and_4];splice=0,GeneBody;Prl3d1;NM_008864;inside_[intron_between_exon_3_and_4];splice=0	FALSE	+	Prl3d1	Prl3d1;Prl3d1	protein_coding;protein_coding	ENSMUST00000082079.4;ENSMUST00000225330.1	4352;4352			0.657277	0.828223	0.744567	0.743356	0.315449	0.284763	0.483388	0.3612	0.382156	2.43157	5.52518e-08	1.03916e-06	0.882575	0.906837	0.908934	0.899449	0.815575	0.804018	0.798618	0.80607	0.0933786	1.11444	3.41384e-05	0.000413099	WTvsKO_0h	No
cg31372112_TC21	chr13	27122420	27122422	CG	TSS;chr13:27121697;Prl3d2;ENSMUST00000080755;+723;2,TSS;chr13:27121741;Prl3d2;ENSMUST00000164964;+679;2	TRUE	+	Prl3d2	Prl3d2;Prl3d2	protein_coding;protein_coding	ENSMUST00000080755.11;ENSMUST00000164964.3	723;679			0.578633	0.628848	0.543751	0.583744	0.188665	0.169806	0.233813	0.197428	0.386316	2.52592	1.06402e-10	2.43737e-08	0.803567	0.817968	0.821639	0.814391	0.641014	0.597542	0.647668	0.628741	0.18565	1.37299	3.24926e-06	0.000163283	WTvsKO_0h	No
cg31372304_TC11	chr13	27169463	27169465	CG	Random	FALSE	-								0.536331	0.66196	0.581637	0.593309	0.136926	0.112468	0.215802	0.155065	0.438244	3.05094	6.30383e-11	1.82222e-08	0.731804	0.775618	0.791569	0.76633	0.515984	0.422709	0.53631	0.491668	0.274663	1.77005	8.95457e-06	0.00022554	WTvsKO_0h	No
cg31372382_BC21	chr13	27195914	27195916	CG	TSS;chr13:27196658;Prl3c1;ENSMUST00000018066;-744;2	FALSE	+	Prl3c1	Prl3c1	protein_coding	ENSMUST00000018066.12	-744			0.672818	0.702834	0.634969	0.670207	0.291434	0.263916	0.358645	0.304665	0.365542	2.22693	1.21288e-09	9.28295e-08	0.849192	0.832102	0.841319	0.840871	0.714912	0.679169	0.727914	0.707331	0.13354	1.12702	1.8393e-05	0.000304809	WTvsKO_0h	No
cg31372397_TC21	chr13	27199123	27199125	CG	TSS;chr13:27198902;Prl3c1;ENSMUST00000110364;+221;1	FALSE	-	Prl3c1	Prl3c1;Prl3c1;Prl3c1	protein_coding;protein_coding;protein_coding	ENSMUST00000018066.12;ENSMUST00000110364.8;ENSMUST00000178072.1	2465;221;-229			0.536161	0.564734	0.506817	0.535904	0.163731	0.14184	0.195597	0.167056	0.368848	2.53791	5.70547e-11	1.71505e-08	0.691419	0.703966	0.714179	0.703188	0.463972	0.425332	0.487261	0.458855	0.244333	1.48359	1.86343e-06	0.0001425	WTvsKO_0h	No
cg31372411_TC21	chr13	27201529	27201531	CG	GeneBody;Prl3c1;NM_001163218;inside_[intron_between_exon_3_and_4];splice=0	FALSE	+	Prl3c1	Prl3c1;Prl3c1;Prl3c1	protein_coding;protein_coding;protein_coding	ENSMUST00000018066.12;ENSMUST00000110364.8;ENSMUST00000178072.1	4871;2627;2177			0.557534	0.733323	0.605395	0.632084	0.208487	0.231897	0.293585	0.244656	0.387428	2.44318	3.4023e-09	1.71475e-07	0.799382	0.804508	0.800253	0.801381	0.670268	0.649386	0.689782	0.669812	0.131569	0.990738	2.65378e-05	0.000364124	WTvsKO_0h	No
cg31372542_BC21	chr13	27233428	27233430	CG	Random	FALSE	-								0.62914	0.659452	0.589359	0.625984	0.230833	0.222145	0.314353	0.255777	0.370207	2.30224	9.05559e-10	7.87596e-08	0.776506	0.750171	0.78274	0.769806	0.599188	0.606181	0.648361	0.61791	0.151896	1.04905	4.05516e-05	0.000452416	WTvsKO_0h	No
cg31372635_TC21	chr13	27259369	27259371	CG	TSS;chr13:27259435;Prl3a1;ENSMUST00000049463;-66;1	FALSE	+	Prl3a1	Prl3a1	protein_coding	ENSMUST00000049463.3	-66			0.499468	0.608707	0.549866	0.55268	0.119039	0.11188	0.179812	0.136911	0.41577	2.99635	1.66151e-11	7.75032e-09	0.767837	0.803421	0.771119	0.780793	0.567737	0.504672	0.534593	0.535667	0.245125	1.62962	1.6183e-06	0.000141014	WTvsKO_0h	No
cg31372928_BC21	chr13	27313270	27313272	CG	PseudogeneTSS;chr13:27314084;Gm11357;ENSMUST00000119758;812,TSS;chr13:27313945;Prl6a1;ENSMUST00000091679;-675;1	FALSE	-	Gm11357;Prl6a1	Gm11357;Prl6a1;Prl6a1	processed_pseudogene;protein_coding;protein_coding	ENSMUST00000119758.1;ENSMUST00000091679.3;ENSMUST00000091680.8	-813;-675;644			0.648804	0.68936	0.639511	0.659225	0.302099	0.261284	0.411029	0.324804	0.334421	2.02963	2.16594e-08	5.56819e-07	0.796184	0.791299	0.822546	0.803343	0.689277	0.648873	0.738349	0.692166	0.111177	0.856406	0.000842774	0.0028932	WTvsKO_0h	No
cg31373049_BC21	chr13	27350212	27350214	CG	TSS;chr13:27350142;Prl8a2;ENSMUST00000223918;+70;1	FALSE	+	Prl8a2	Prl8a2;Prl8a2;Prl8a2	protein_coding;protein_coding;protein_coding	ENSMUST00000018403.7;ENSMUST00000110363.8;ENSMUST00000223918.1	4540;4530;70			0.5072	0.571742	0.484701	0.521214	0.10259	0.0799132	0.152729	0.111744	0.40947	3.16537	9.94794e-12	5.47896e-09	0.751873	0.768622	0.743366	0.75462	0.401603	0.361629	0.452187	0.405139	0.349481	2.17926	2.26289e-07	0.000108644	Common	No
cg31373052_TC11	chr13	27350995	27350997	CG	GeneBody;Prl8a2;NM_010088;inside_[cds_in_exon_4];splice=0,TSS;chr13:27350142;Prl8a2;ENSMUST00000223918;+853;2	FALSE	-	Prl8a2	Prl8a2;Prl8a2;Prl8a2	protein_coding;protein_coding;protein_coding	ENSMUST00000018403.7;ENSMUST00000110363.8;ENSMUST00000223918.1	5323;5313;853			0.477843	0.644274	0.608435	0.576851	0.138226	0.0977717	0.161144	0.132381	0.44447	3.19706	1.88844e-11	8.44687e-09	0.84008	0.889092	0.900649	0.876607	0.648211	0.604189	0.611558	0.62132	0.255288	2.14326	1.99076e-06	0.00014463	WTvsKO_0h	No
cg31373053_TC21	chr13	27351007	27351009	CG	GeneBody;Prl8a2;NM_001289919;inside_[cds_in_exon_4];splice=0	FALSE	-	Prl8a2	Prl8a2;Prl8a2;Prl8a2	protein_coding;protein_coding;protein_coding	ENSMUST00000018403.7;ENSMUST00000110363.8;ENSMUST00000223918.1	5335;5325;865			0.437794	0.542489	0.50134	0.493875	0.143407	0.112763	0.1602	0.13879	0.355085	2.61246	7.80286e-11	2.03838e-08	0.72618	0.736085	0.757139	0.739801	0.507466	0.452681	0.484197	0.481448	0.258354	1.61645	8.94268e-07	0.000130543	WTvsKO_0h	No
cg31373255_TC11	chr13	27385240	27385242	CG	Random	FALSE	+	Prl2b1	Prl2b1;Prl2b1	protein_coding;protein_coding	ENSMUST00000091678.2;ENSMUST00000102954.9	5606;5606			0.601715	0.720648	0.684764	0.669042	0.177963	0.19272	0.299179	0.223288	0.445755	2.86129	1.50736e-10	2.90805e-08	0.817741	0.810569	0.817381	0.81523	0.674941	0.650546	0.562193	0.629227	0.186004	1.37124	3.20811e-05	0.000399745	WTvsKO_0h	No
cg31373259_TC21	chr13	27385557	27385559	CG	GeneBody;Prl2b1;NM_025532;inside_[intron_between_exon_3_and_4];splice=0	FALSE	+	Prl2b1	Prl2b1;Prl2b1	protein_coding;protein_coding	ENSMUST00000091678.2;ENSMUST00000102954.9	5289;5289			0.463301	0.550705	0.475401	0.496469	0.139573	0.104822	0.214539	0.152978	0.343491	2.50998	2.05229e-09	1.25941e-07	0.716552	0.749522	0.736224	0.734099	0.45566	0.429157	0.568911	0.484576	0.249523	1.55601	3.24692e-05	0.000402258	WTvsKO_0h	No
cg31373270_TC21	chr13	27390776	27390778	CG	TSS;chr13:27390845;Prl2b1;ENSMUST00000091678-ENSMUST00000102954;+69;2	FALSE	-	Prl2b1	Prl2b1;Prl2b1	protein_coding;protein_coding	ENSMUST00000091678.2;ENSMUST00000102954.9	70;70			0.575126	0.614958	0.562273	0.584119	0.19348	0.164031	0.265112	0.207541	0.376578	2.45116	4.20051e-10	5.13215e-08	0.779307	0.813595	0.788828	0.79391	0.581409	0.535766	0.583994	0.567057	0.226853	1.55907	1.69595e-06	0.000141264	WTvsKO_0h	No
cg31373411_TC11	chr13	27433593	27433595	CG	GeneBody;Prl8a6;NM_001271379;inside_[intron_between_exon_4_and_5];splice=0,GeneBody;Prl8a6;NM_011167;inside_[intron_between_exon_5_and_6];splice=0	FALSE	-	Prl8a6	Prl8a6;Prl8a6;Prl8a6	protein_coding;protein_coding;protein_coding	ENSMUST00000018392.8;ENSMUST00000080762.11;ENSMUST00000110355.9	5042;5095;5045			0.491717	0.61357	0.53513	0.546806	0.15884	0.128212	0.186542	0.157864	0.388941	2.7057	6.8512e-11	1.91408e-08	0.702601	0.756372	0.710298	0.723091	0.500452	0.471539	0.505448	0.49248	0.230611	1.43298	4.18829e-06	0.000174607	WTvsKO_0h	No
cg31373419_TC21	chr13	27434941	27434943	CG	GeneBody;Prl8a6;NM_001271378;inside_[intron_between_exon_4_and_5];splice=0	FALSE	-	Prl8a6	Prl8a6;Prl8a6;Prl8a6	protein_coding;protein_coding;protein_coding	ENSMUST00000018392.8;ENSMUST00000080762.11;ENSMUST00000110355.9	3694;3747;3697			0.53815	0.614784	0.540631	0.564521	0.170754	0.134131	0.208696	0.171194	0.393328	2.6744	6.92448e-11	1.92222e-08	0.815311	0.817336	0.814438	0.815695	0.538567	0.529114	0.562889	0.543523	0.272172	1.89395	7.74026e-08	7.7154e-05	WTvsKO_0h	No
cg31373432_BC21	chr13	27438588	27438590	CG	TSS;chr13:27438634;Prl8a6;ENSMUST00000018392;+46;1,TSS;chr13:27438637;Prl8a6;ENSMUST00000110355;+49;1,TSS;chr13:27438687;Prl8a6;ENSMUST00000080762;+99;1	FALSE	-	Prl8a6	Prl8a6;Prl8a6;Prl8a6	protein_coding;protein_coding;protein_coding	ENSMUST00000018392.8;ENSMUST00000080762.11;ENSMUST00000110355.9	47;100;50			0.616161	0.705687	0.61869	0.646846	0.274132	0.225748	0.346876	0.282252	0.364594	2.2462	4.08785e-09	1.91366e-07	0.846362	0.835879	0.864315	0.848852	0.724377	0.663119	0.700955	0.696151	0.152701	1.29384	1.41459e-05	0.000272084	WTvsKO_0h	No
cg31373999_BC21	chr13	27579507	27579509	CG	GeneBody;Prl8a1;NM_028477;inside_[intron_between_exon_2_and_3];splice=0	FALSE	-	Prl8a1	Prl8a1;Prl8a1	protein_coding;protein_coding	ENSMUST00000006664.7;ENSMUST00000095926.1	2664;2664			0.621919	0.660596	0.660732	0.647749	0.218123	0.197902	0.287227	0.234417	0.413332	2.60416	6.1173e-11	1.79059e-08	0.813091	0.817569	0.82753	0.819397	0.645779	0.588377	0.618988	0.617715	0.201682	1.48855	1.62843e-06	0.000141028	WTvsKO_0h	No
cg31374102_BC11	chr13	27607021	27607023	CG	GeneBody;Prl7b1;NM_029355;inside_[cds_in_exon_2];splice=0	FALSE	+	Prl7b1	Prl7b1	protein_coding	ENSMUST00000080595.2	3561			0.590681	0.756658	0.685894	0.677744	0.282709	0.224358	0.268588	0.258552	0.419193	2.62355	4.15523e-10	5.10487e-08	0.842185	0.870765	0.876917	0.863289	0.744641	0.702098	0.722361	0.723033	0.140255	1.28021	1.60514e-05	0.000287373	WTvsKO_0h	No
cg31374111_BC21	chr13	27610717	27610719	CG	TSS;chr13:27610581;Prl7b1;ENSMUST00000080595;-136;1	FALSE	+	Prl7b1	Prl7b1	protein_coding	ENSMUST00000080595.2	-135			0.608479	0.679182	0.60342	0.63036	0.213924	0.176183	0.263845	0.217984	0.412376	2.63561	8.8043e-11	2.19319e-08	0.800741	0.82987	0.815312	0.815308	0.605099	0.563053	0.624901	0.597684	0.217623	1.57245	1.81541e-06	0.000141929	WTvsKO_0h	No
cg31374234_TC21	chr13	27642035	27642037	CG	TSS;chr13:27642463;Prl7a1;ENSMUST00000095924;+428;2,TSS;chr13:27642492;Prl7a1;ENSMUST00000006659-ENSMUST00000224852;+457;2	FALSE	+	Prl7a1	Prl7a1;Prl7a1;Prl7a1	protein_coding;protein_coding;protein_coding	ENSMUST00000006659.7;ENSMUST00000095924.10;ENSMUST00000224852.1	458;429;458			0.616086	0.702203	0.603119	0.640469	0.252923	0.220298	0.301293	0.258171	0.382298	2.37439	6.60414e-10	6.58965e-08	0.771413	0.7957	0.795319	0.787477	0.617925	0.570069	0.638517	0.608837	0.17864	1.25102	1.37511e-05	0.000268988	WTvsKO_0h	No
cg31374276_BC21	chr13	27658658	27658660	CG	GeneBody;Prl7a2;NM_011168;inside_[3-UTR;noncoding_exon_6];splice=0	FALSE	-	Prl7a2	Prl7a2	protein_coding	ENSMUST00000006660.6	9378			0.640782	0.736932	0.679269	0.685661	0.296636	0.291988	0.42858	0.339068	0.346593	2.11404	1.84242e-08	5.00024e-07	0.839517	0.849019	0.836011	0.841516	0.770053	0.7294	0.76403	0.754494	0.0870215	0.786422	0.00026151	0.001347	WTvsKO_0h	No
cg31374300_BC21	chr13	27668028	27668030	CG	TSS;chr13:27668035;Prl7a2;ENSMUST00000006660;+7;1	FALSE	+	Prl7a2	Prl7a2	protein_coding	ENSMUST00000006660.6	8			0.637702	0.705581	0.645246	0.662843	0.329017	0.281955	0.362334	0.324435	0.338408	2.04396	4.42031e-09	2.00847e-07	0.809818	0.818261	0.833959	0.82068	0.72991	0.67613	0.706878	0.704306	0.116374	0.941077	0.000103867	0.000764417	WTvsKO_0h	No
cg31374301_TC11	chr13	27668077	27668079	CG	TSS;chr13:27668035;Prl7a2;ENSMUST00000006660;-42;2	FALSE	-	Prl7a2	Prl7a2	protein_coding	ENSMUST00000006660.6	-41			0.594546	0.741846	0.716933	0.684442	0.253242	0.212015	0.322568	0.262608	0.421834	2.64681	6.69795e-10	6.63242e-08	0.80759	0.802493	0.813577	0.807887	0.685847	0.652178	0.659841	0.665955	0.141931	1.07616	1.25425e-05	0.00025802	WTvsKO_0h	No
cg31374831_TC21	chr13	27801668	27801670	CG	TSS;chr13:27801653;Prl2a1;ENSMUST00000023602;+15;1	FALSE	-	Prl2a1	Prl2a1	protein_coding	ENSMUST00000023602.5	15			0.510004	0.591259	0.537619	0.546294	0.167554	0.144032	0.202864	0.171483	0.374811	2.55535	8.1228e-11	2.0946e-08	0.776062	0.771879	0.795976	0.781306	0.540768	0.519042	0.548641	0.53615	0.245155	1.62944	4.24535e-07	0.000121257	WTvsKO_0h	No
cg31375402_TC21	chr13	27929543	27929545	CG	PseudogeneTSS;chr13:27929606;Gm34165;ENSMUST00000222012;61	FALSE	-	Gm34165	Gm34165	processed_pseudogene	ENSMUST00000222012.1	-62			0.585155	0.659342	0.640446	0.628314	0.249345	0.210579	0.350038	0.269987	0.358327	2.2237	6.25866e-09	2.5052e-07	0.835157	0.812439	0.776844	0.808146	0.647565	0.61786	0.596916	0.62078	0.187366	1.37271	1.6241e-05	0.000288722	WTvsKO_0h	No
cg31375791_TC21	chr13	28016291	28016293	CG	TSS;chr13:28016211;Prl4a1;ENSMUST00000021779;+80;1	FALSE	+	Prl4a1	Prl4a1	protein_coding	ENSMUST00000021779.7	80			0.702455	0.729005	0.712589	0.714683	0.378006	0.328719	0.405422	0.370716	0.343967	2.09264	1.39698e-09	1.00849e-07	0.822782	0.828309	0.827739	0.826277	0.751043	0.722348	0.714757	0.729383	0.096894	0.817414	0.000132921	0.000885259	WTvsKO_0h	No
cg31375792_BC21	chr13	28016364	28016366	CG	TSS;chr13:28016211;Prl4a1;ENSMUST00000021779;+153;2	FALSE	-	Prl4a1	Prl4a1	protein_coding	ENSMUST00000021779.7	153			0.517886	0.636869	0.529164	0.561306	0.208568	0.156217	0.254846	0.206544	0.354763	2.32915	3.3849e-09	1.70959e-07	0.772329	0.778591	0.794594	0.781838	0.5854	0.54576	0.573103	0.568088	0.21375	1.44691	1.3682e-06	0.000137652	WTvsKO_0h	No
cg31375800_TC21	chr13	28018585	28018587	CG	MonoallelicMeth	FALSE	-	Prl4a1	Prl4a1	protein_coding	ENSMUST00000021779.7	2374			0.448342	0.523196	0.448876	0.473471	0.128708	0.10421	0.172875	0.135265	0.338207	2.55327	2.26504e-10	3.59898e-08	0.666208	0.712557	0.650197	0.676321	0.468245	0.429127	0.420425	0.439266	0.237055	1.41983	6.22816e-06	0.000197566	WTvsKO_0h	No
cg31388917_TC11	chr13	29739815	29739817	CG	Random	FALSE	-	Cdkal1	Cdkal1;Cdkal1;Cdkal1;Cdkal1;Cdkal1;Cdkal1	protein_coding;protein_coding;protein_coding;protein_coding;protein_coding;protein_coding	ENSMUST00000006353.13;ENSMUST00000123641.7;ENSMUST00000131792.7;ENSMUST00000137225.7;ENSMUST00000140278.7;ENSMUST00000153086.7	115859;115842;115828;115824;115832;115828			0.607175	0.744068	0.673064	0.674769	0.375349	0.272751	0.362437	0.336846	0.337924	2.05805	2.90929e-08	6.76846e-07	0.82394	0.845057	0.830406	0.833135	0.809456	0.715458	0.647391	0.724102	0.109033	0.890634	0.008021	0.0146246	WTvsKO_0h	No
cg31402109_TC11	chr13	31241065	31241067	CG	lincRNATSS;chr13:31241086;4930401O12Rik;ENSMUST00000153175;19	FALSE	+	4930401O12Rik	4930401O12Rik	lincRNA	ENSMUST00000153175.2	21			0.531214	0.677002	0.61281	0.607009	0.285214	0.20299	0.262342	0.250182	0.356827	2.23352	5.09898e-09	2.19975e-07	0.833451	0.844671	0.836953	0.838359	0.707796	0.65188	0.68149	0.680389	0.15797	1.28245	6.18776e-06	0.000197228	WTvsKO_0h	No
cg31413697_TC11	chr13	32734651	32734653	CG	VMR;chr13:32734538-32734657	FALSE	+	Mylk4	Mylk4;Mylk4;Mylk4;Mylk4	protein_coding;protein_coding;protein_coding;protein_coding	ENSMUST00000057428.12;ENSMUST00000229922.1;ENSMUST00000230119.1;ENSMUST00000238977.2	47128;41898;41762;49303			0.53284	0.669827	0.631579	0.611416	0.17679	0.102877	0.209054	0.162907	0.448509	3.08376	1.0871e-10	2.46288e-08	0.861769	0.864039	0.875909	0.867239	0.732284	0.71129	0.614999	0.686191	0.181048	1.56643	2.25223e-05	0.000336254	WTvsKO_0h	No
cg31416314_BC11	chr13	33200967	33200969	CG	GeneBody;Serpinb9d;NM_011460;inside_[intron_between_exon_6_and_7];splice=0	FALSE	+	Serpinb9d	Serpinb9d	protein_coding	ENSMUST00000067198.2	8009			0.484308	0.629222	0.548497	0.554009	0.205832	0.159746	0.276809	0.214129	0.33988	2.22723	1.53809e-08	4.45358e-07	0.744889	0.770663	0.767089	0.76088	0.585862	0.522339	0.557162	0.555121	0.205759	1.35113	5.13631e-06	0.00018525	WTvsKO_0h	No
cg31416919_BC21	chr13	33328159	33328161	CG	GeneBody;Serpinb9f;NM_183197;inside_[intron_between_exon_4_and_5];splice=0	FALSE	-	Serpinb9f	Serpinb9f	protein_coding	ENSMUST00000075515.6	4083			0.646458	0.691573	0.648001	0.662011	0.364538	0.253089	0.359728	0.325785	0.336225	2.03695	1.06985e-08	3.51614e-07	0.830405	0.877162	0.842995	0.850187	0.755525	0.71065	0.752284	0.739486	0.110701	1.00861	0.00024703	0.00129981	WTvsKO_0h	No
cg31417695_TC11	chr13	33542357	33542359	CG	PseudogeneTSS;chr13:33542999;Gm11393;ENSMUST00000118019;640	FALSE	-	Gm11393	Gm11393	unprocessed_pseudogene	ENSMUST00000118019.1	-641			0.69063	0.775554	0.748832	0.738338	0.368702	0.316947	0.399461	0.361703	0.376635	2.33175	6.04908e-10	6.25492e-08	0.866738	0.874674	0.845502	0.862305	0.741447	0.671354	0.691707	0.701503	0.160802	1.41344	1.22398e-05	0.00025513	WTvsKO_0h	No
cg31418257_BC21	chr13	33655589	33655591	CG	MonoallelicMeth	FALSE	-								0.495866	0.628692	0.642723	0.589094	0.231098	0.214928	0.297742	0.247923	0.341171	2.14141	1.39171e-08	4.17576e-07	0.723367	0.719155	0.732308	0.724943	0.566018	0.553523	0.617653	0.579064	0.145879	0.936658	9.14687e-05	0.000711038	WTvsKO_0h	No
cg31419092_TC21	chr13	33793539	33793541	CG	MonoallelicMeth	FALSE	+	Vmn2r-ps94	Vmn2r-ps94	unprocessed_pseudogene	ENSMUST00000116665.3	26620			0.550637	0.590531	0.522261	0.554476	0.20932	0.175345	0.267124	0.217263	0.337213	2.18569	2.49157e-09	1.41334e-07	0.752003	0.720985	0.697229	0.723406	0.538714	0.464732	0.501252	0.501566	0.22184	1.38208	1.1579e-05	0.000249255	WTvsKO_0h	No
cg31430140_TC11	chr13	35222299	35222301	CG	MonoallelicMeth	FALSE	+								0.570951	0.730086	0.637439	0.646159	0.312882	0.221856	0.338081	0.29094	0.355219	2.19217	2.44821e-08	6.0429e-07	0.804637	0.852701	0.815462	0.824267	0.742507	0.676172	0.679683	0.699454	0.124813	1.01459	0.000337334	0.00158775	WTvsKO_0h	No
cg31430997_TC21	chr13	35395407	35395409	CG	lincRNATSS;chr13:35395383;Gm48703;ENSMUST00000226101;25	FALSE	-	Gm48703	Gm48703	lincRNA	ENSMUST00000226101.1	25			0.443844	0.580632	0.512493	0.512323	0.24233	0.228161	0.242785	0.237759	0.274564	1.75331	8.60412e-08	1.40692e-06	0.730054	0.732264	0.766914	0.743077	0.477498	0.443632	0.270402	0.397177	0.3459	2.16457	4.22356e-05	0.000462746	WTvsKO_96h	No
cg31438158_BC21	chr13	36296811	36296813	CG	Enhancer	FALSE	+	Fars2	Fars2;Fars2;Fars2;Fars2;Fars2;Fars2;Fars2	protein_coding;protein_coding;protein_coding;protein_coding;protein_coding;protein_coding;protein_coding	ENSMUST00000021857.12;ENSMUST00000099582.3;ENSMUST00000224241.1;ENSMUST00000224611.1;ENSMUST00000224619.1;ENSMUST00000224916.1;ENSMUST00000225525.1	179400;178954;166912;178937;64542;178932;178940			0.47803	0.501725	0.487238	0.488998	0.403398	0.361868	0.345732	0.370333	0.118665	0.704202	0.00277782	0.00445687	0.733594	0.701297	0.792501	0.742464	0.471192	0.419043	0.317808	0.402681	0.339783	2.12192	1.43654e-05	0.000273836	WTvsKO_96h	No
cg31442325_BC11	chr13	36866002	36866004	CG	Random	FALSE	+	Gm47675;Gm49144	Gm47675;Gm49144	lincRNA;antisense	ENSMUST00000224473.1;ENSMUST00000225846.1	-1377;29637			0.605999	0.717003	0.649581	0.657527	0.293315	0.193434	0.298829	0.261859	0.395668	2.47058	1.16527e-09	9.06463e-08	0.860486	0.846853	0.855402	0.854247	0.725264	0.702816	0.668412	0.698831	0.155416	1.3343	5.37944e-06	0.00018819	WTvsKO_0h	No
cg31503826_TC11	chr13	43301963	43301965	CG	Enhancer	FALSE	-	Gfod1	Gfod1;Gfod1	protein_coding;protein_coding	ENSMUST00000055341.6;ENSMUST00000222779.1	2209;1442		Shore	0.154143	0.299759	0.298664	0.250855	0.118065	0.131678	0.192891	0.147545	0.103311	0.925168	0.00392024	0.00603172	0.677693	0.661949	0.676636	0.672093	0.304094	0.292134	0.423654	0.339961	0.332132	2.00739	4.75685e-06	0.00018021	WTvsKO_96h	No
cg31505120_BC11	chr13	43399412	43399414	CG	Enhancer	FALSE	-	Nol7	Nol7;Nol7;Nol7;Nol7	protein_coding;protein_coding;protein_coding;protein_coding	ENSMUST00000071926.4;ENSMUST00000220997.1;ENSMUST00000222305.1;ENSMUST00000222499.1	1023;778;-1272;1021		Shore	0.258982	0.402005	0.369469	0.343486	0.0559652	0.047473	0.0732762	0.0589048	0.284581	3.06762	2.01018e-11	8.78088e-09	0.71925	0.703508	0.756802	0.72652	0.275471	0.286666	0.291397	0.284511	0.442009	2.74464	9.45553e-09	2.24543e-05	WTvsKO_96h	No
cg31520137_TC21	chr13	44702160	44702162	CG	Enhancer	FALSE	+								0.153768	0.255019	0.228941	0.212576	0.107244	0.0794402	0.0789702	0.0885514	0.124024	1.45901	4.80973e-06	2.58192e-05	0.648683	0.551614	0.638088	0.612795	0.332558	0.312522	0.202202	0.282428	0.330368	2.04146	2.49309e-05	0.000353118	WTvsKO_96h	No
[truncated: 5,663 more rows]
