# Supplementary figures and images for: Chromatin activity of IκBα mediates the exit from naïve pluripotency
Source: eLife journal article supplement (doi:10.7554/elife.102784), 2025-01-16

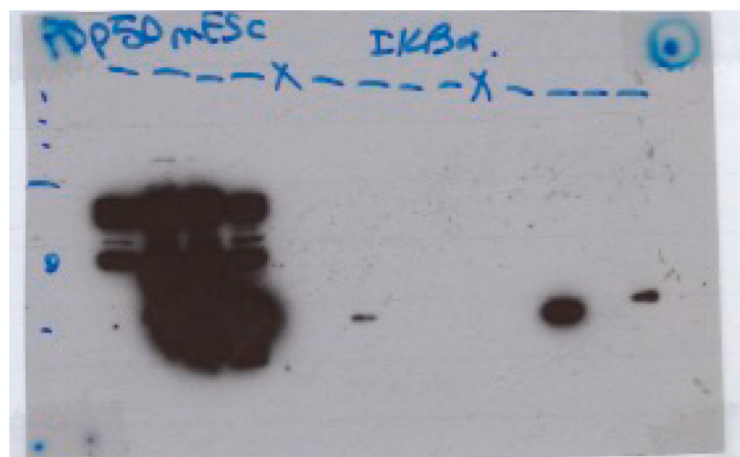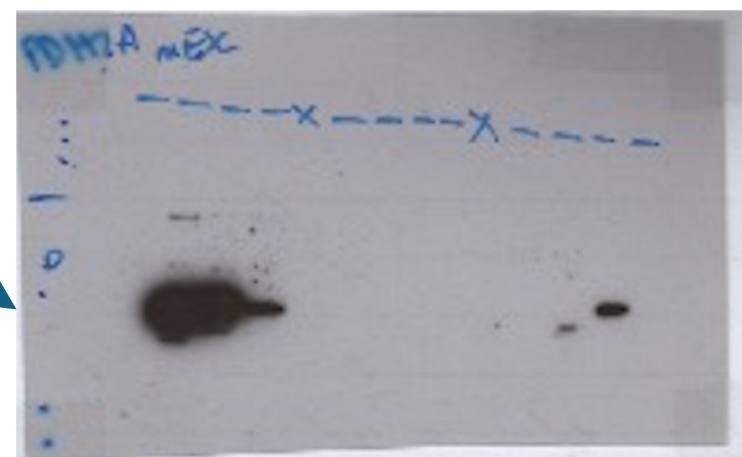

IkBa

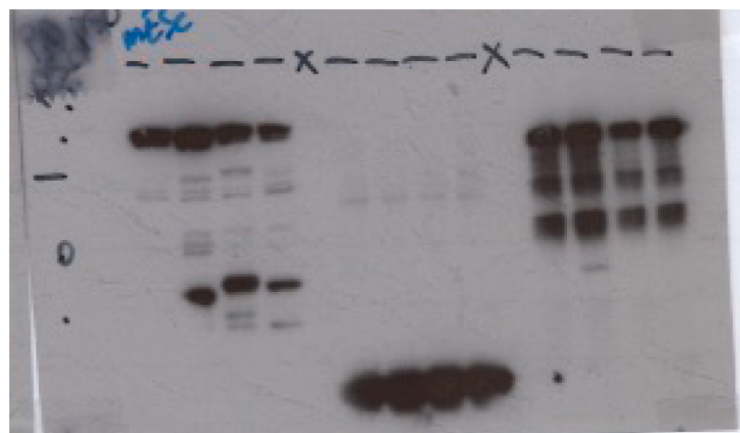

GSP-p50'

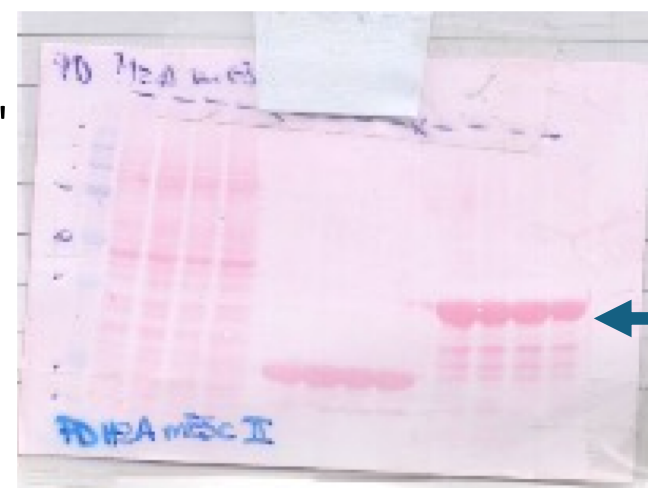

GST-H2A

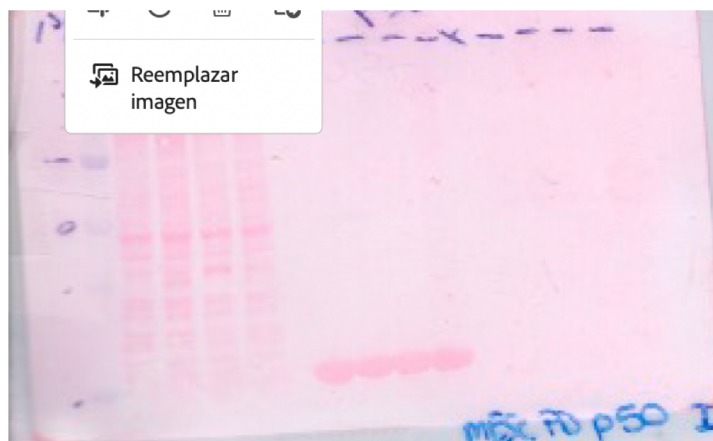

Figure 5. Source data 1. Original membranes corresponding to Figure 5, panel C.

Supplement: fig5-data1 [file Figure5C-annotated.pdf › Figure 5_source data 1/Figure5C-annotated.pdf]
